# Supplementary material for: Gene expression networks in the Drosophila Genetic Reference Panel
Source: HighWire-hosted journal article supplement (doi:10.1101/gr.257592.119), 2020-03-01
Supplement: Supplemental_Fig_S2.docx [file Supplemental_Fig_S2.docx]

**Supplemental Figure S2. Distribution of mapping ambiguity for difference classes of transcripts.** Density distributions for ΔBitscore (log scale) are plotted for all known genes, NTRs filtered for low expression across the DGRP, and NTRs retained after filtering. The bitscore was obtained by mapping transcript sequences to the reference genome using blat (https://genome.ucsc.edu/FAQ/FAQblat.html). The ΔBitscore is the difference between the bit scores of the best alignment and the second best alignment. The greater the ΔBitscore, the less ambiguous is the alignment. The majority of NTRs retained after filtering had higher ΔBitscores than transcripts from known genes.
