# Supplementary material for: Gene expression networks in the Drosophila Genetic Reference Panel
Source: HighWire-hosted journal article supplement (doi:10.1101/gr.257592.119), 2020-03-01
Supplement: Supplemental_Fig_S3.docx [file Supplemental_Fig_S3.docx]

**Supplemental Fig S3. Distribution of median and maximum expression across a diverse set of cell lines.** Density distributions for the median and maximum expression across 41 cell lines exposed or not exposed to ecdysone (Stoiber et al. 2016) for the three classes of transcripts (for known genes, NTRs filtered for low expression across the DGRP, and NTRs retained after filtering). The expression (in terms of transcripts per million [TPM]) was estimated using kallisto (Bray et al. 2016), an alignment-free abundance estimator. Expression was not lower for retained NTRs than known genes, suggesting that NTRs inferred from variation among DGRP lines are also expressed in at least some cell lines in an independent data set.
