# Supplementary material for: Gene expression networks in the Drosophila Genetic Reference Panel
Source: HighWire-hosted journal article supplement (doi:10.1101/gr.257592.119), 2020-03-01
Supplement: Supplemental_Fig_S4.docx [file Supplemental_Fig_S4.docx]

**Supplemental Figure S4.** **Comparison of RNA-seq and tiling arrays.** Scatter plots show the broad-sense heritability (*H*2) estimates from RNA-seq in this study compared to tiling array data26. (A) Female gene expression (*r* = 0.56, *P* < 1E-15). (B) Male gene expression (*r* = 0.55, *P* = 1E-15).
