# Supplementary material for: Gene expression networks in the Drosophila Genetic Reference Panel
Source: HighWire-hosted journal article supplement (doi:10.1101/gr.257592.119), 2020-03-01

**Supplemental Figure S5.** **Small *cis*-*trans* eQTL genetic networks in females and males.** Symbols and color coding are as in Figure 3.


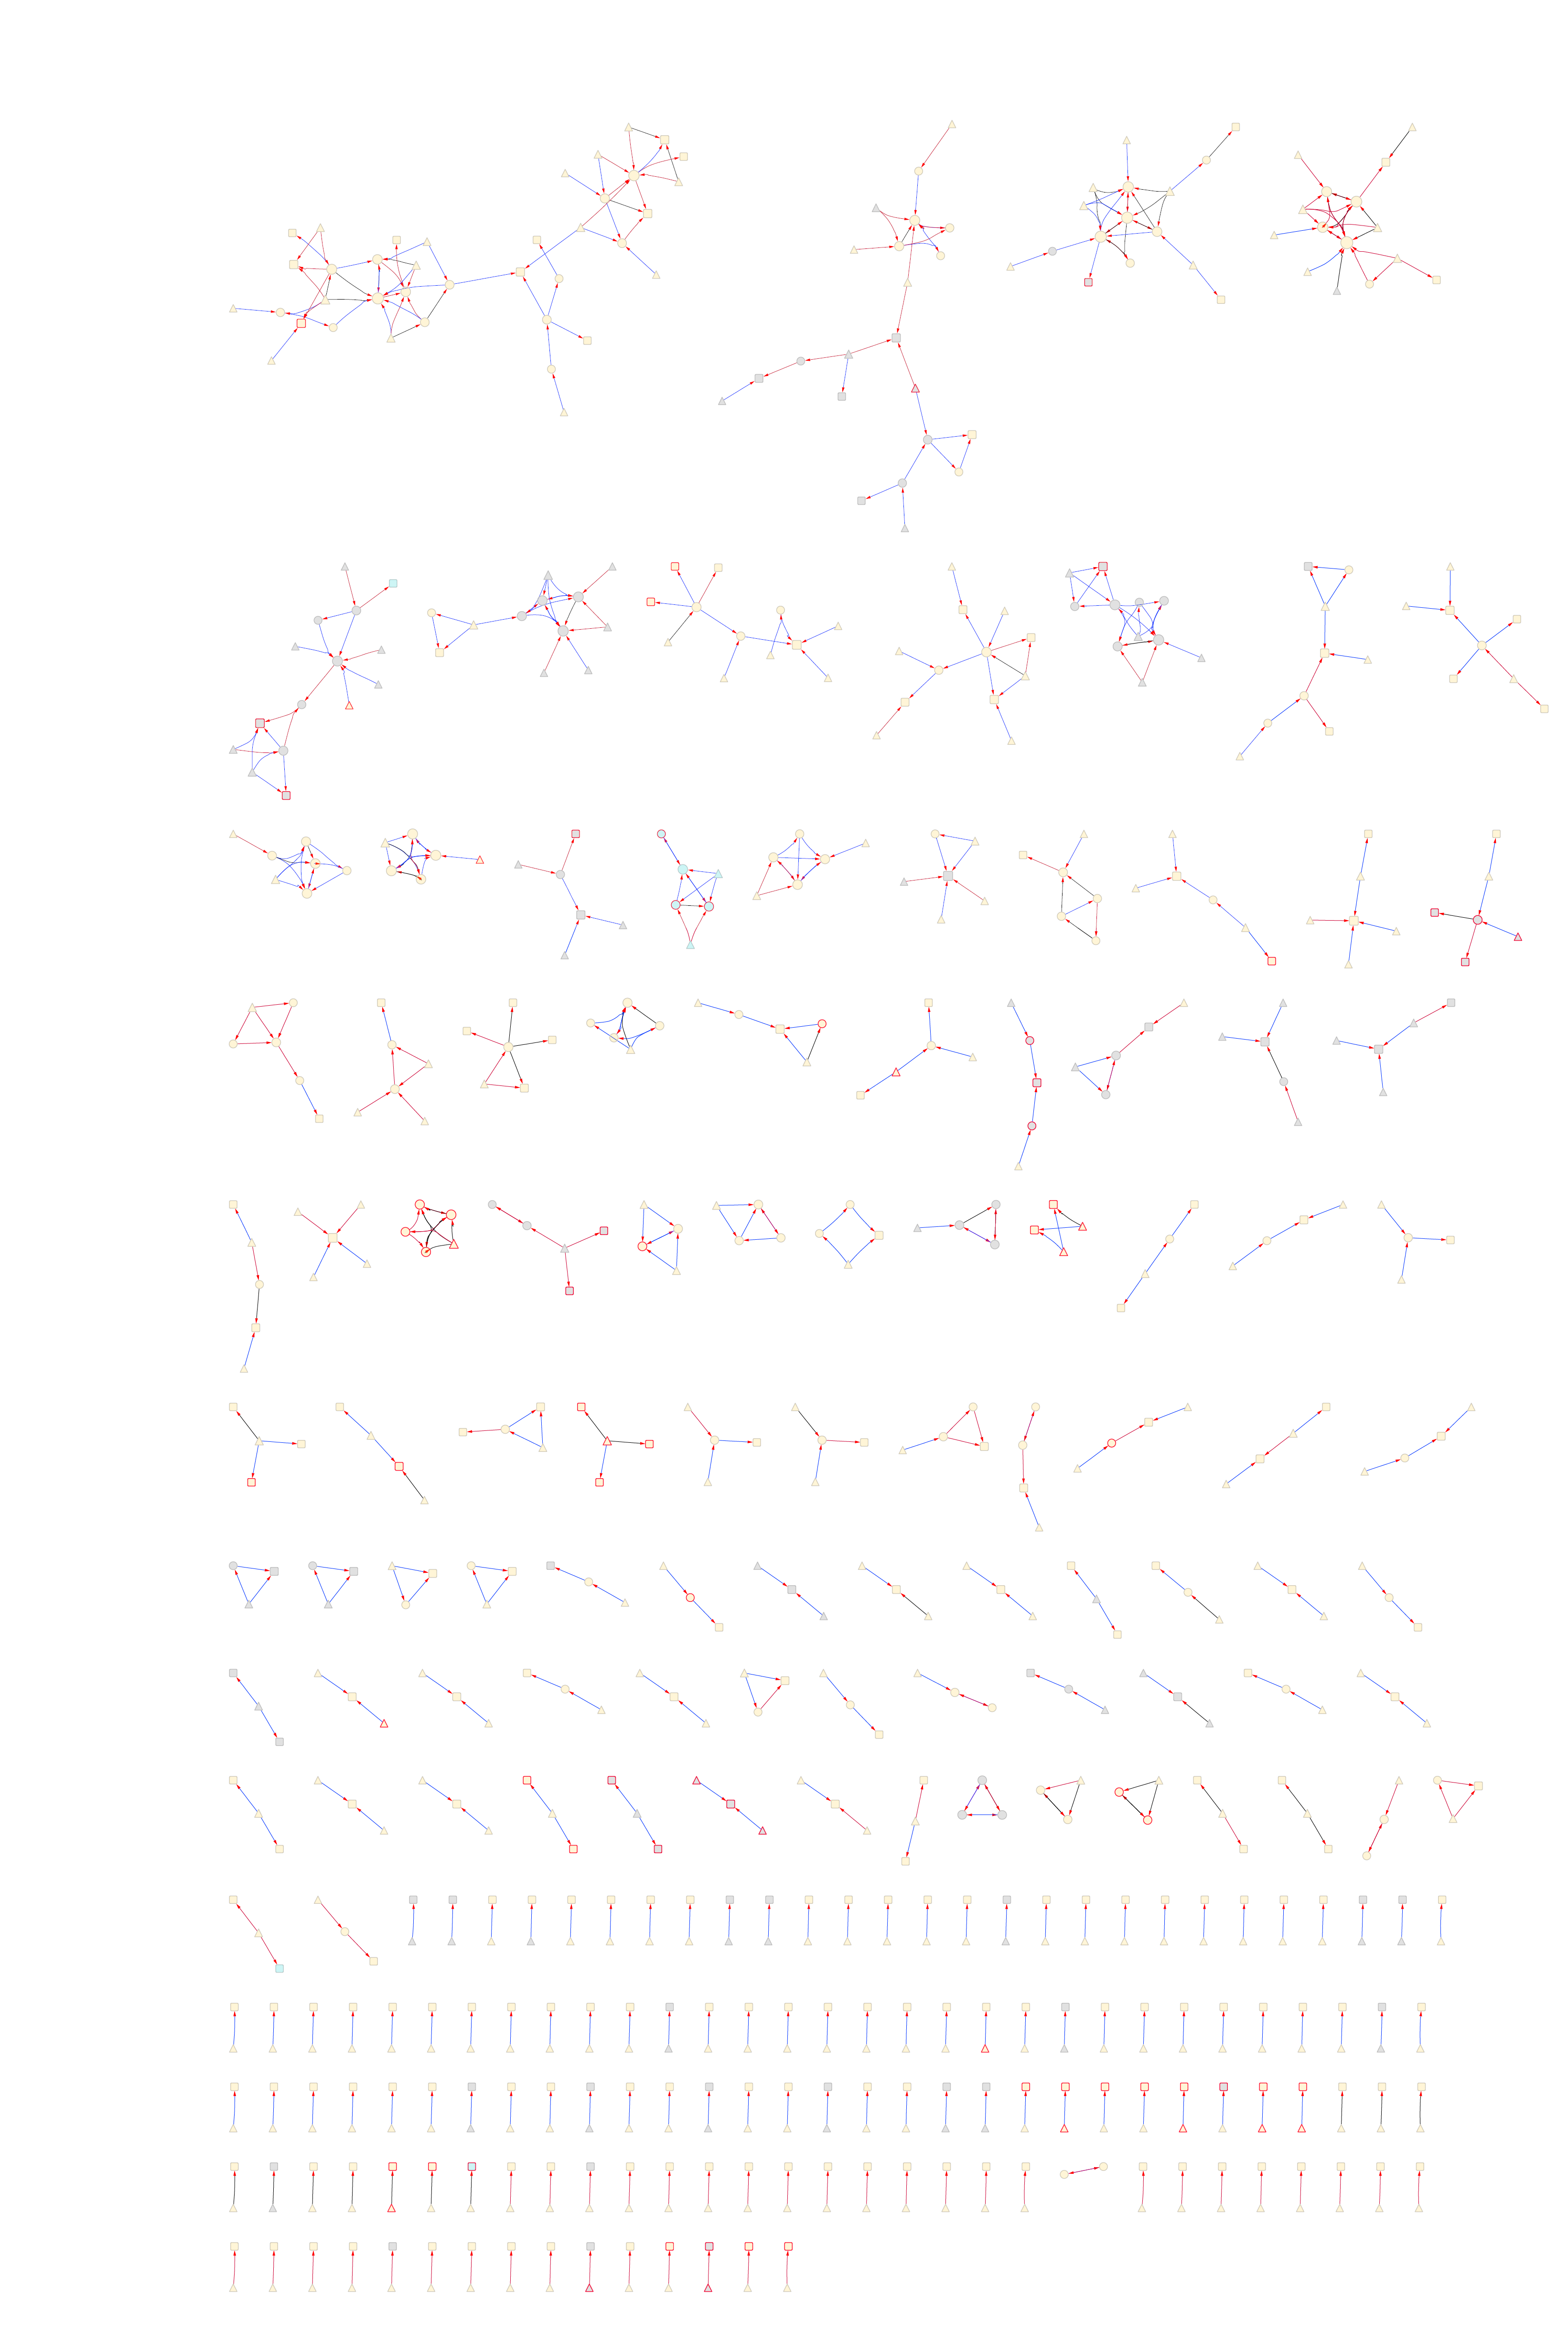

Supplement: Supplemental_Fig_S5.docx [file Supplemental_Fig_S5.docx]
