# Supplementary material for: Gene expression networks in the Drosophila Genetic Reference Panel
Source: HighWire-hosted journal article supplement (doi:10.1101/gr.257592.119), 2020-03-01

**Supplemental Figure S6. Female *cis*-*trans* eQTL genetic network.** Symbols and color-coding are as for Figure 3. (**A**) Network 1 and 2. (**B**) Other networks.


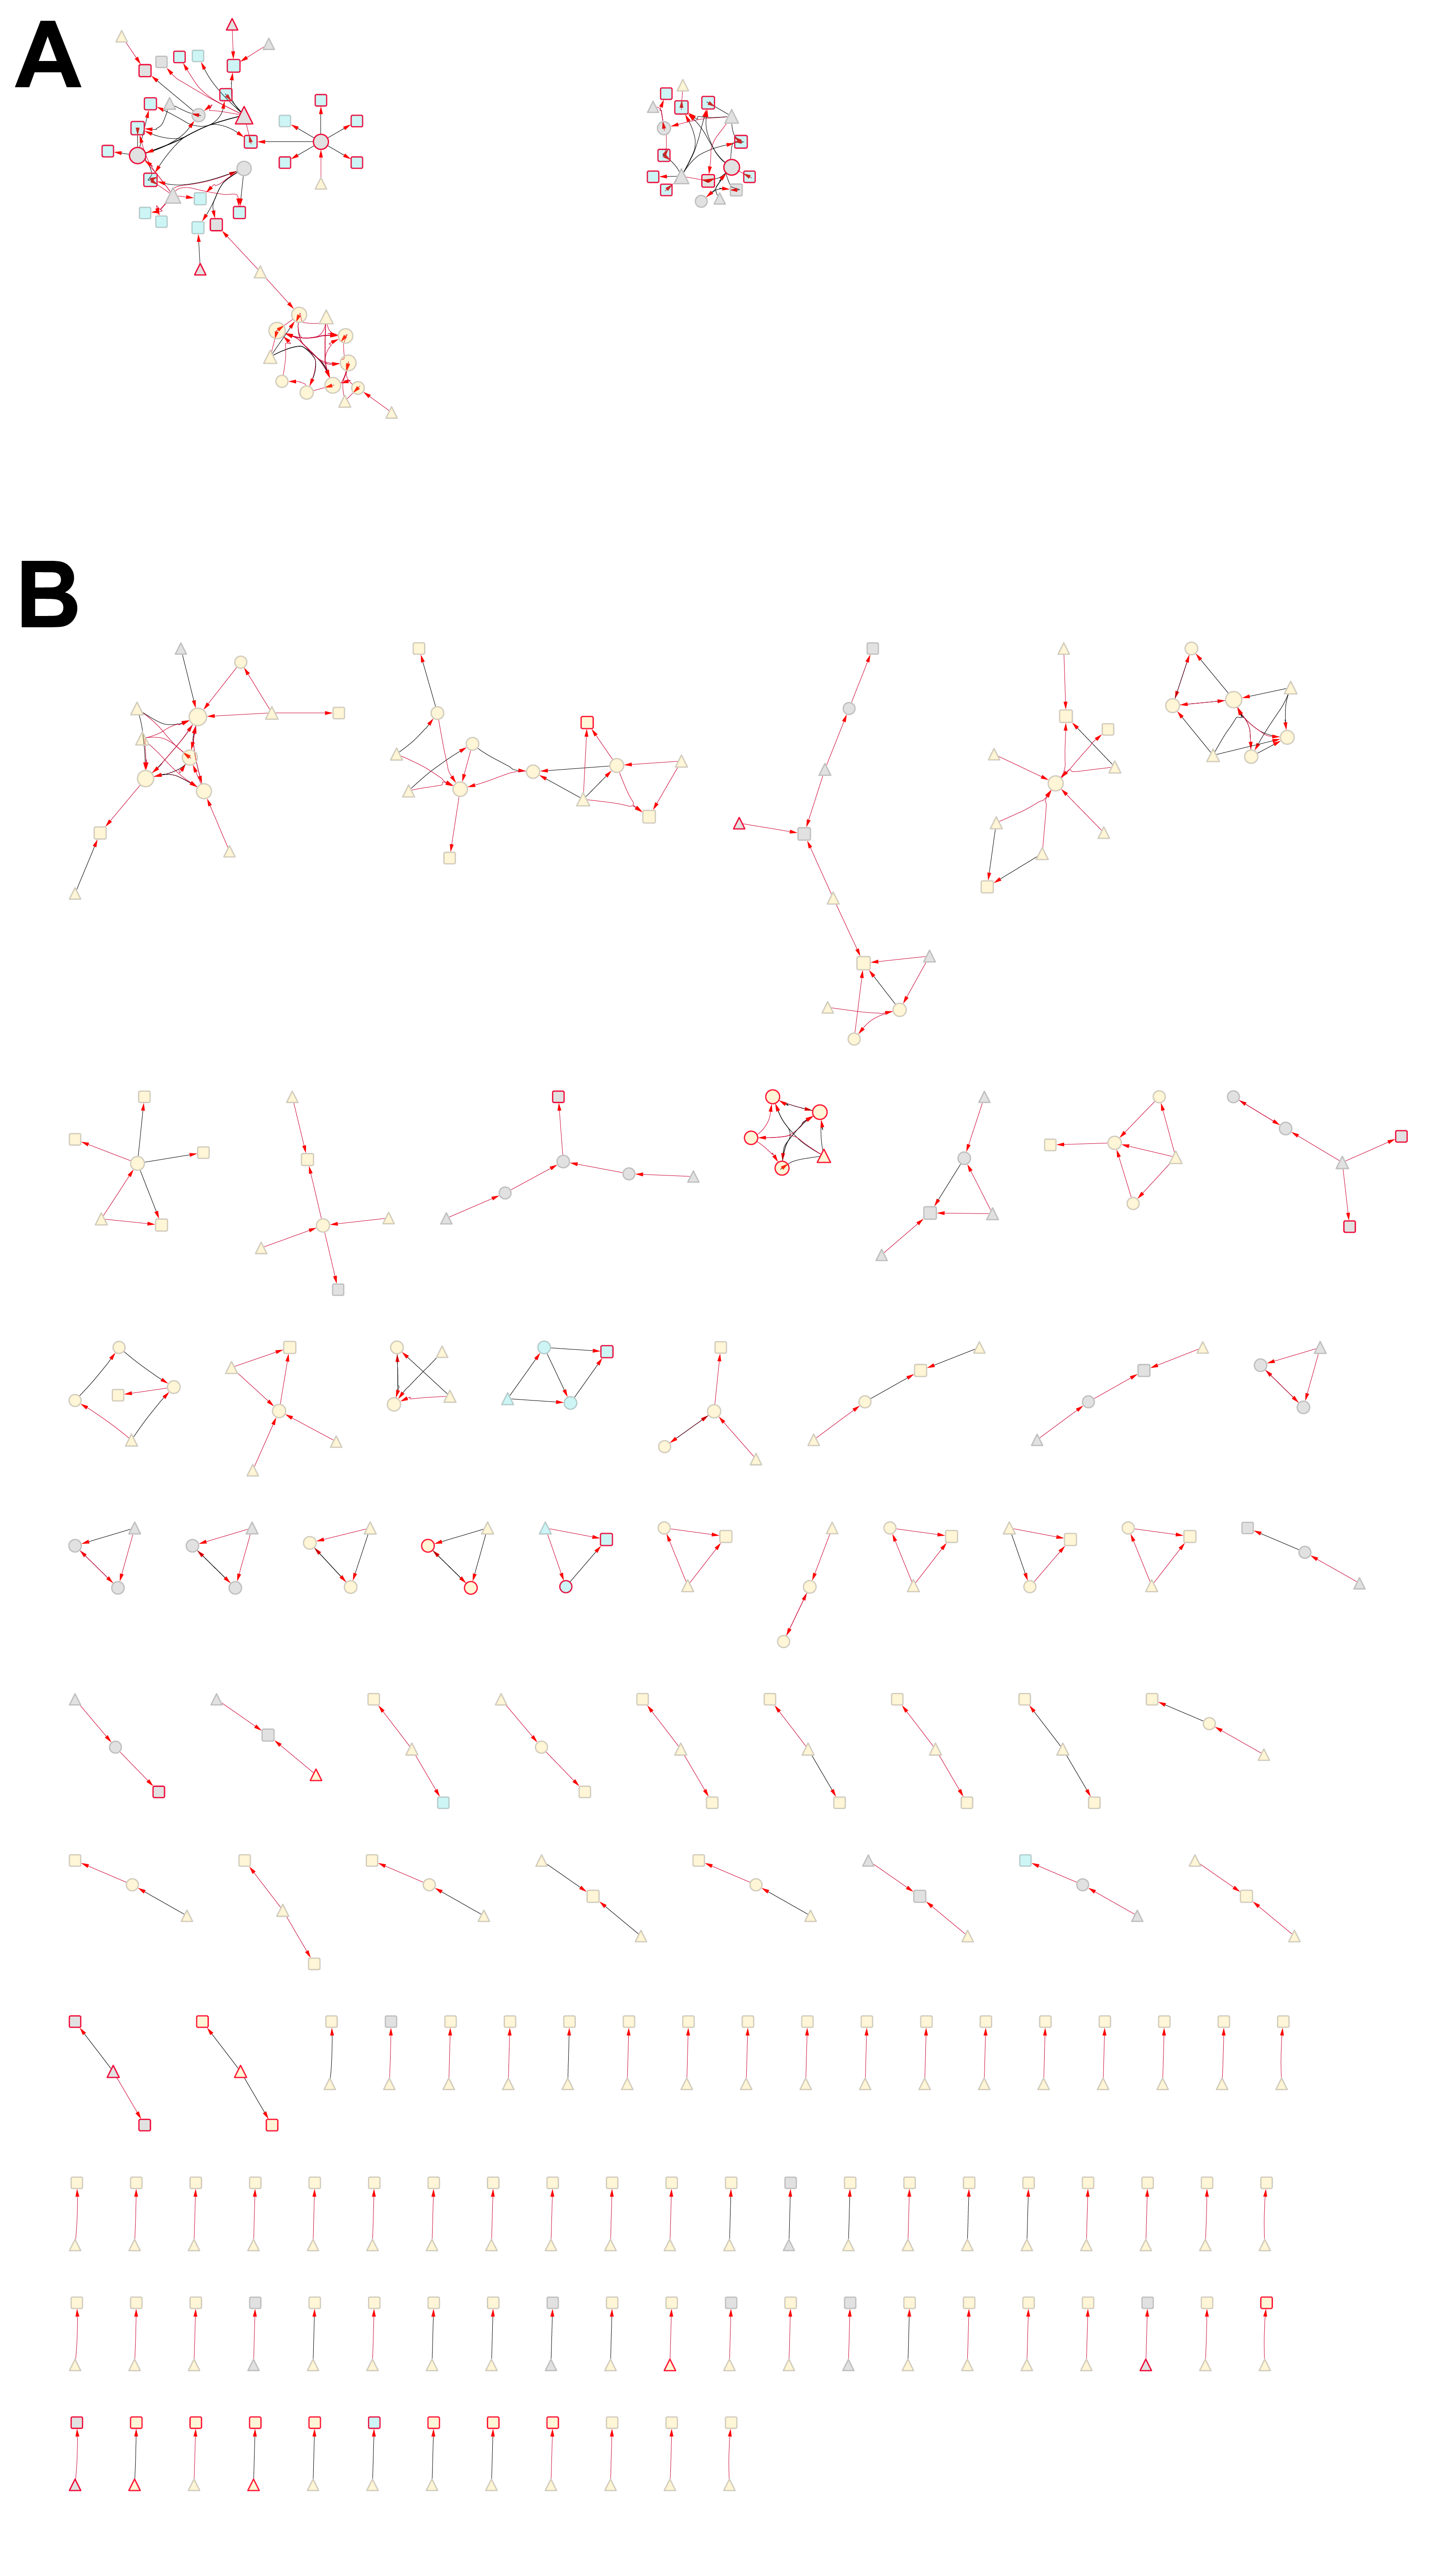

Supplement: Supplemental_Fig_S6.docx [file Supplemental_Fig_S6.docx]
