# Supplementary material for: Gene expression networks in the Drosophila Genetic Reference Panel
Source: HighWire-hosted journal article supplement (doi:10.1101/gr.257592.119), 2020-03-01

**Supplemental Figure S8. Genomic location of eQTLs for TE expression and associated TEs.** eQTL chromosome positions (bp) are given on the *X*-axis, and the TEs with which they are associated on the *Y*-axis. Red points denote female-specific eQTLs, blue indicates male-specific eQTLs, and black shows eQTLs shared by males and females. (**A**) Chromosome *2*. (**B**) Chromosome *3*. **C**) Chromosome *X*. (**D**) Chromosome *4*.


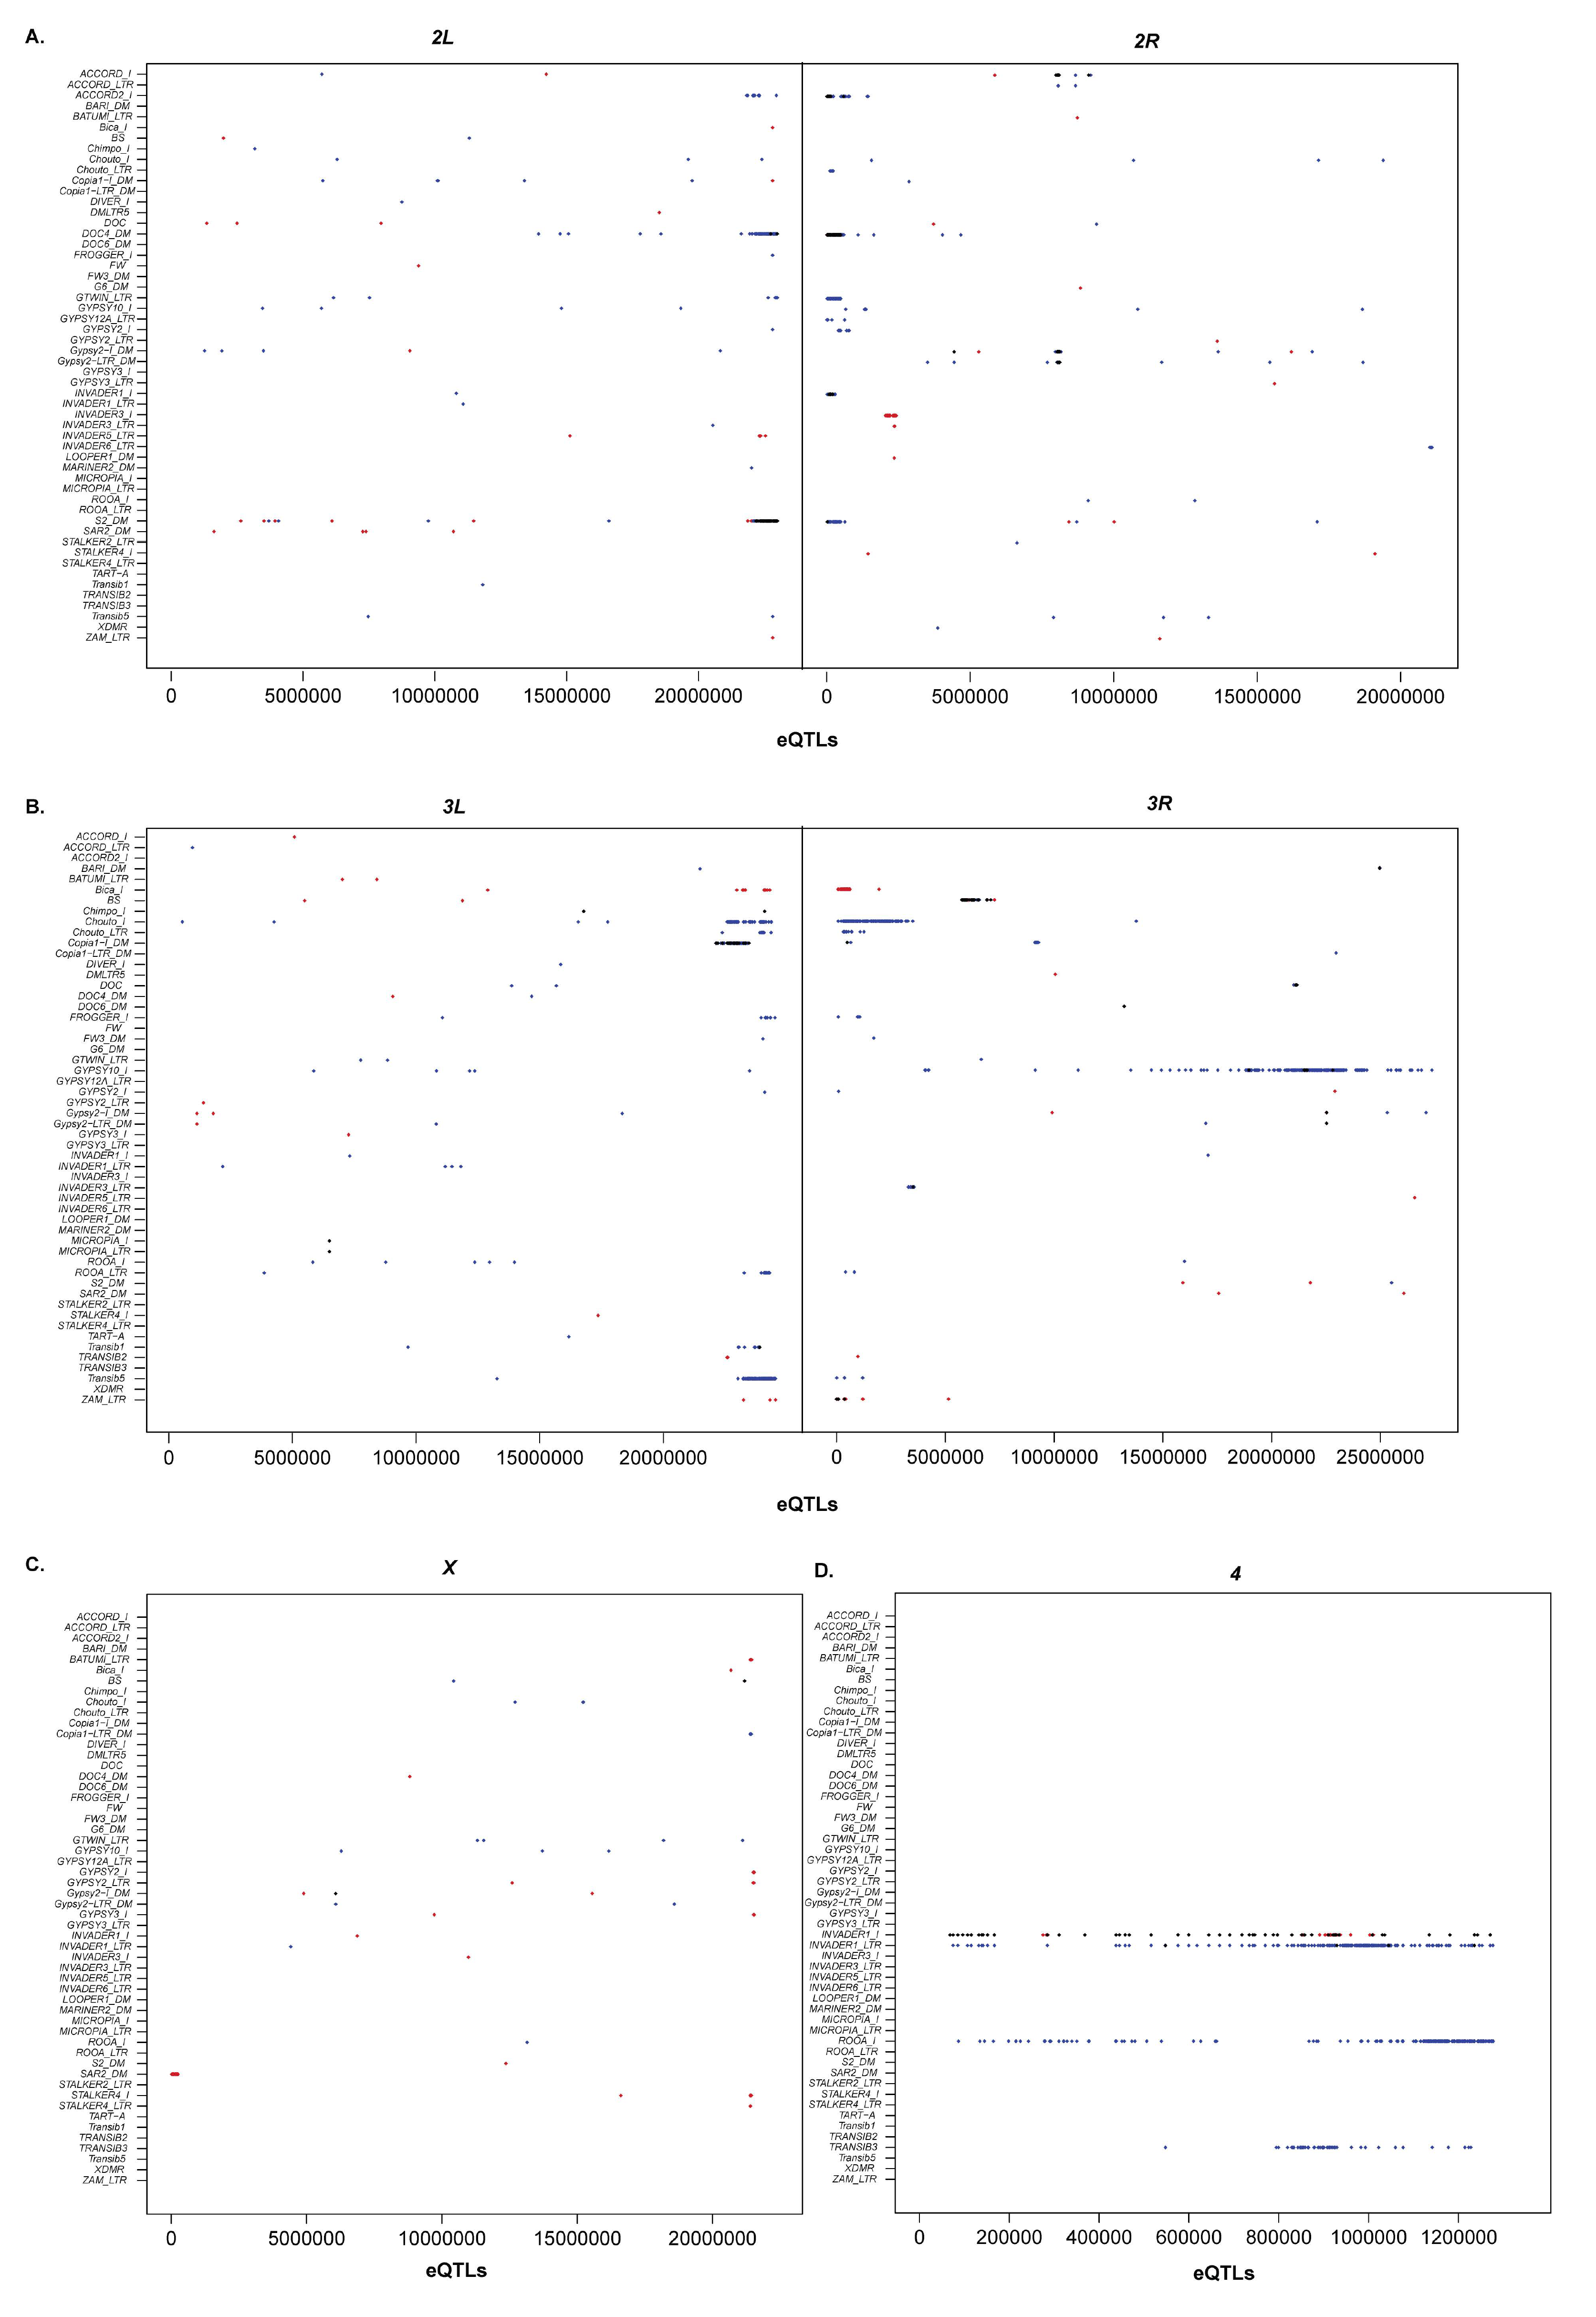

Supplement: Supplemental_Fig_S8.docx [file Supplemental_Fig_S8.docx]
