# Supplementary material for: Gene expression networks in the Drosophila Genetic Reference Panel
Source: HighWire-hosted journal article supplement (doi:10.1101/gr.257592.119), 2020-03-01
Supplement: Supplemental_Table__S11.xlsx.xlsx [file Supplemental_Table__S11.xlsx.xlsx]

## Sheet: Table S11A
Microbial Species	Variant ID	FDR	P-Value	FlyBase Gene ID	FlyBase Gene Symbol	FlyBase Gene Name	Distance From Start (bp)	Site Class	Strand	GO Biological Process	GO Cellular Component	GO Molecular Function	Human Orthologs
Podospora anserina	3R_16110563_SNP	0	8.51e-11	FBgn0262582	cic	capicua	0	INTRON	+	negative regulation of transcription from RNA polymerase II promoter ; GO:0000122 | inferred from direct assay <newline> negative regulation of cell growth ; GO:0030308 | inferred from mutant phenotype <newline> eye morphogenesis ; GO:0048592 | inferred from mutant phenotype <newline> regulation of transcription, DNA-templated ; GO:0006355 | inferred from mutant phenotype <newline> negative regul…	nucleus ; GO:0005634 | inferred from direct assay	transcriptional repressor activity, RNA polymerase II transcription regulatory region sequence-specific binding ; GO:0001227 | inferred from mutant phenotype <newline> repressing transcription factor binding ; GO:0070491 | inferred from physical interaction with gro <newline> RNA polymerase II regulatory region sequence-specific DNA binding ; GO:0000977 | inferred from direct assay <newline> sequ…	Hsap\CIC
Podospora anserina	3R_16110563_SNP	0	8.51e-11	XLOC_021469			39	5PRIME	+
Borrelia coriaceae	3R_3548461_DEL	0	1.17e-10	FBgn0037512	CG2616	CG2616	0	EXON	+	mitochondrial transport ; GO:0006839 | inferred from biological aspect of ancestor with PANTHER:PTN000211803	mitochondrial inner membrane ; GO:0005743 | inferred from biological aspect of ancestor with PANTHER:PTN000211803 <newline> integral component of membrane ; GO:0016021 | inferred from biological aspect of ancestor with PANTHER:PTN000211803	transmembrane transporter activity ; GO:0022857 | inferred from biological aspect of ancestor with PANTHER:PTN000211803	Hsap\SLC25A40 <newline> Hsap\SLC25A39
Leuconostoc pseudomesenteroides	3L_1622254_SNP	0.044359	8.68e-08	FBgn0035244	ABCB7	ATP binding cassette subfamily B member 7	0	EXON	+	transmembrane transport ; GO:0055085 | inferred from electronic annotation with InterPro:IPR011527 <newline> heme transport ; GO:0015886 | inferred from sequence or structural similarity with UniProtKB:O75027 <newline> iron-sulfur cluster assembly ; GO:0016226 | inferred from sequence or structural similarity with UniProtKB:O75027 <newline> cellular iron ion homeostasis ; GO:0006879 | inferred fr…	integral component of membrane ; GO:0016021 | inferred from electronic annotation with InterPro:IPR011527 <newline> mitochondrial inner membrane ; GO:0005743 | inferred from biological aspect of ancestor with PANTHER:PTN000657864 <newline> mitochondrial inner membrane ; GO:0005743 | inferred from sequence or structural similarity with UniProtKB:O75027	ATP binding ; GO:0005524 | inferred from electronic annotation with InterPro:IPR003439, InterPro:IPR011527, InterPro:IPR017871 <newline> heme transporter activity ; GO:0015232 | inferred from sequence or structural similarity with UniProtKB:O75027 <newline> ATPase activity, coupled to transmembrane movement of substances ; GO:0042626 | inferred from sequence or structural similarity with UniProtK…	Hsap\ABCB7 <newline> Hsap\ABCB6
Leuconostoc pseudomesenteroides	3L_1622254_SNP	0.044359	8.68e-08	FBgn0035245	GC	gamma-glutamyl carboxylase	925	3PRIME	-	protein carboxylation ; GO:0018214 | inferred from direct assay <newline> peptidyl-glutamic acid carboxylation ; GO:0017187 | inferred from direct assay	-	gamma-glutamyl carboxylase activity ; GO:0008488 | inferred from direct assay	Hsap\GGCX
Leuconostoc pseudomesenteroides	3L_1626925_SNP	0.044359	3.76e-10	FBgn0035245	GC	gamma-glutamyl carboxylase	0	INTRON	-	protein carboxylation ; GO:0018214 | inferred from direct assay <newline> peptidyl-glutamic acid carboxylation ; GO:0017187 | inferred from direct assay	-	gamma-glutamyl carboxylase activity ; GO:0008488 | inferred from direct assay	Hsap\GGCX
Leuconostoc pseudomesenteroides	3L_1626925_SNP	0.044359	3.76e-10	FBgn0035246	CG13928	CG13928	0	EXON	-	negative regulation of translation ; GO:0017148 | inferred from direct assay <newline> positive regulation of nuclear-transcribed mRNA poly(A) tail shortening ; GO:0060213 | inferred from direct assay	-	-	-
Leuconostoc pseudomesenteroides	3L_1626928_SNP	0.044359	1.04e-09	FBgn0035245	GC	gamma-glutamyl carboxylase	0	INTRON	-	protein carboxylation ; GO:0018214 | inferred from direct assay <newline> peptidyl-glutamic acid carboxylation ; GO:0017187 | inferred from direct assay	-	gamma-glutamyl carboxylase activity ; GO:0008488 | inferred from direct assay	Hsap\GGCX
Leuconostoc pseudomesenteroides	3L_1626928_SNP	0.044359	1.04e-09	FBgn0035246	CG13928	CG13928	0	EXON	-	negative regulation of translation ; GO:0017148 | inferred from direct assay <newline> positive regulation of nuclear-transcribed mRNA poly(A) tail shortening ; GO:0060213 | inferred from direct assay	-	-	-
Leuconostoc pseudomesenteroides	3L_1626990_SNP	0.044359	6.35e-10	FBgn0035245	GC	gamma-glutamyl carboxylase	0	INTRON	-	protein carboxylation ; GO:0018214 | inferred from direct assay <newline> peptidyl-glutamic acid carboxylation ; GO:0017187 | inferred from direct assay	-	gamma-glutamyl carboxylase activity ; GO:0008488 | inferred from direct assay	Hsap\GGCX
Leuconostoc pseudomesenteroides	3L_1626990_SNP	0.044359	6.35e-10	FBgn0035246	CG13928	CG13928	0	EXON	-	negative regulation of translation ; GO:0017148 | inferred from direct assay <newline> positive regulation of nuclear-transcribed mRNA poly(A) tail shortening ; GO:0060213 | inferred from direct assay	-	-	-
Leuconostoc pseudomesenteroides	3L_1627882_SNP	0.044359	6.37e-11	FBgn0035245	GC	gamma-glutamyl carboxylase	0	INTRON	-	protein carboxylation ; GO:0018214 | inferred from direct assay <newline> peptidyl-glutamic acid carboxylation ; GO:0017187 | inferred from direct assay	-	gamma-glutamyl carboxylase activity ; GO:0008488 | inferred from direct assay	Hsap\GGCX
Leuconostoc pseudomesenteroides	3L_1627882_SNP	0.044359	6.37e-11	FBgn0035246	CG13928	CG13928	0	EXON	-	negative regulation of translation ; GO:0017148 | inferred from direct assay <newline> positive regulation of nuclear-transcribed mRNA poly(A) tail shortening ; GO:0060213 | inferred from direct assay	-	-	-
Leuconostoc pseudomesenteroides	3L_1627965_SNP	0.044359	5.83e-12	FBgn0035245	GC	gamma-glutamyl carboxylase	0	INTRON	-	protein carboxylation ; GO:0018214 | inferred from direct assay <newline> peptidyl-glutamic acid carboxylation ; GO:0017187 | inferred from direct assay	-	gamma-glutamyl carboxylase activity ; GO:0008488 | inferred from direct assay	Hsap\GGCX
Leuconostoc pseudomesenteroides	3L_1627965_SNP	0.044359	5.83e-12	FBgn0035246	CG13928	CG13928	0	EXON	-	negative regulation of translation ; GO:0017148 | inferred from direct assay <newline> positive regulation of nuclear-transcribed mRNA poly(A) tail shortening ; GO:0060213 | inferred from direct assay	-	-	-
Leuconostoc pseudomesenteroides	3L_1628027_SNP	0.044359	1.12e-09	FBgn0035245	GC	gamma-glutamyl carboxylase	0	INTRON	-	protein carboxylation ; GO:0018214 | inferred from direct assay <newline> peptidyl-glutamic acid carboxylation ; GO:0017187 | inferred from direct assay	-	gamma-glutamyl carboxylase activity ; GO:0008488 | inferred from direct assay	Hsap\GGCX
Leuconostoc pseudomesenteroides	3L_1628027_SNP	0.044359	1.12e-09	FBgn0035246	CG13928	CG13928	0	EXON	-	negative regulation of translation ; GO:0017148 | inferred from direct assay <newline> positive regulation of nuclear-transcribed mRNA poly(A) tail shortening ; GO:0060213 | inferred from direct assay	-	-	-
Leuconostoc pseudomesenteroides	3L_1628158_SNP	0.044359	1.2e-12	FBgn0035245	GC	gamma-glutamyl carboxylase	0	INTRON	-	protein carboxylation ; GO:0018214 | inferred from direct assay <newline> peptidyl-glutamic acid carboxylation ; GO:0017187 | inferred from direct assay	-	gamma-glutamyl carboxylase activity ; GO:0008488 | inferred from direct assay	Hsap\GGCX
Leuconostoc pseudomesenteroides	3L_1628158_SNP	0.044359	1.2e-12	FBgn0035246	CG13928	CG13928	0	EXON	-	negative regulation of translation ; GO:0017148 | inferred from direct assay <newline> positive regulation of nuclear-transcribed mRNA poly(A) tail shortening ; GO:0060213 | inferred from direct assay	-	-	-
Leuconostoc pseudomesenteroides	3L_1628476_SNP	0.044359	1.76e-11	FBgn0035245	GC	gamma-glutamyl carboxylase	0	INTRON	-	protein carboxylation ; GO:0018214 | inferred from direct assay <newline> peptidyl-glutamic acid carboxylation ; GO:0017187 | inferred from direct assay	-	gamma-glutamyl carboxylase activity ; GO:0008488 | inferred from direct assay	Hsap\GGCX
Leuconostoc pseudomesenteroides	3L_1628476_SNP	0.044359	1.76e-11	FBgn0035246	CG13928	CG13928	99	5PRIME	-	negative regulation of translation ; GO:0017148 | inferred from direct assay <newline> positive regulation of nuclear-transcribed mRNA poly(A) tail shortening ; GO:0060213 | inferred from direct assay	-	-	-
Leuconostoc pseudomesenteroides	3L_1628537_SNP	0.044359	1.91e-11	FBgn0035245	GC	gamma-glutamyl carboxylase	0	INTRON	-	protein carboxylation ; GO:0018214 | inferred from direct assay <newline> peptidyl-glutamic acid carboxylation ; GO:0017187 | inferred from direct assay	-	gamma-glutamyl carboxylase activity ; GO:0008488 | inferred from direct assay	Hsap\GGCX
Leuconostoc pseudomesenteroides	3L_1628537_SNP	0.044359	1.91e-11	FBgn0035246	CG13928	CG13928	160	5PRIME	-	negative regulation of translation ; GO:0017148 | inferred from direct assay <newline> positive regulation of nuclear-transcribed mRNA poly(A) tail shortening ; GO:0060213 | inferred from direct assay	-	-	-
Leuconostoc pseudomesenteroides	3L_1628680_SNP	0.044359	6.39e-07	FBgn0035245	GC	gamma-glutamyl carboxylase	0	INTRON	-	protein carboxylation ; GO:0018214 | inferred from direct assay <newline> peptidyl-glutamic acid carboxylation ; GO:0017187 | inferred from direct assay	-	gamma-glutamyl carboxylase activity ; GO:0008488 | inferred from direct assay	Hsap\GGCX
Leuconostoc pseudomesenteroides	3L_1628680_SNP	0.044359	6.39e-07	FBgn0035246	CG13928	CG13928	303	5PRIME	-	negative regulation of translation ; GO:0017148 | inferred from direct assay <newline> positive regulation of nuclear-transcribed mRNA poly(A) tail shortening ; GO:0060213 | inferred from direct assay	-	-	-
Leuconostoc pseudomesenteroides	3L_1628722_DEL	0.044359	6.39e-08	FBgn0035245	GC	gamma-glutamyl carboxylase	0	INTRON	-	protein carboxylation ; GO:0018214 | inferred from direct assay <newline> peptidyl-glutamic acid carboxylation ; GO:0017187 | inferred from direct assay	-	gamma-glutamyl carboxylase activity ; GO:0008488 | inferred from direct assay	Hsap\GGCX
Leuconostoc pseudomesenteroides	3L_1628722_DEL	0.044359	6.39e-08	FBgn0035246	CG13928	CG13928	345	5PRIME	-	negative regulation of translation ; GO:0017148 | inferred from direct assay <newline> positive regulation of nuclear-transcribed mRNA poly(A) tail shortening ; GO:0060213 | inferred from direct assay	-	-	-
Leuconostoc pseudomesenteroides	3L_1628852_SNP	0.044359	6.85e-13	FBgn0035245	GC	gamma-glutamyl carboxylase	0	INTRON	-	protein carboxylation ; GO:0018214 | inferred from direct assay <newline> peptidyl-glutamic acid carboxylation ; GO:0017187 | inferred from direct assay	-	gamma-glutamyl carboxylase activity ; GO:0008488 | inferred from direct assay	Hsap\GGCX
Leuconostoc pseudomesenteroides	3L_1628852_SNP	0.044359	6.85e-13	FBgn0035246	CG13928	CG13928	475	5PRIME	-	negative regulation of translation ; GO:0017148 | inferred from direct assay <newline> positive regulation of nuclear-transcribed mRNA poly(A) tail shortening ; GO:0060213 | inferred from direct assay	-	-	-
Leuconostoc pseudomesenteroides	3L_1628978_SNP	0.044359	4.2e-12	FBgn0035245	GC	gamma-glutamyl carboxylase	0	INTRON	-	protein carboxylation ; GO:0018214 | inferred from direct assay <newline> peptidyl-glutamic acid carboxylation ; GO:0017187 | inferred from direct assay	-	gamma-glutamyl carboxylase activity ; GO:0008488 | inferred from direct assay	Hsap\GGCX
Leuconostoc pseudomesenteroides	3L_1628978_SNP	0.044359	4.2e-12	FBgn0035246	CG13928	CG13928	601	5PRIME	-	negative regulation of translation ; GO:0017148 | inferred from direct assay <newline> positive regulation of nuclear-transcribed mRNA poly(A) tail shortening ; GO:0060213 | inferred from direct assay	-	-	-
Leuconostoc pseudomesenteroides	3L_1629536_SNP	0.044359	2.24e-13	FBgn0013342	nSyb	neuronal Synaptobrevin	812	3PRIME	-	exocytosis ; GO:0006887 | inferred from biological aspect of ancestor with PANTHER:PTN000473885 <newline> vesicle-mediated transport ; GO:0016192 | inferred from sequence or structural similarity <newline> vesicle-mediated transport ; GO:0016192 | non-traceable author statement <newline> neurotransmitter secretion ; GO:0007269 | non-traceable author statement <newline> vesicle fusion ; GO:0006906…	integral component of membrane ; GO:0016021 | inferred from electronic annotation with InterPro:IPR001388 <newline> synaptic vesicle ; GO:0008021 | colocalizes_with inferred from direct assay <newline> terminal bouton ; GO:0043195 | inferred from direct assay <newline> plasma membrane ; GO:0005886 | inferred from direct assay <newline> SNARE complex ; GO:0031201 | inferred from direct assay <newl…	SNAP receptor activity ; GO:0005484 | inferred from sequence or structural similarity <newline> SNAP receptor activity ; GO:0005484 | inferred from direct assay <newline> SNARE binding ; GO:0000149 | inferred from physical interaction with Snap25, Syx1A <newline> SNAP receptor activity ; GO:0005484 | non-traceable author statement	Hsap\VAMP2 <newline> Hsap\VAMP8 <newline> Hsap\VAMP3 <newline> Hsap\VAMP4 <newline> Hsap\VAMP5 <newline> Hsap\VAMP1 <newline> Hsap\SEC22C <newline> Hsap\SEC22B <newline> Hsap\YKT6 <newline> Hsap\VAMP7
Leuconostoc pseudomesenteroides	3L_1629536_SNP	0.044359	2.24e-13	FBgn0035245	GC	gamma-glutamyl carboxylase	235	5PRIME	-	protein carboxylation ; GO:0018214 | inferred from direct assay <newline> peptidyl-glutamic acid carboxylation ; GO:0017187 | inferred from direct assay	-	gamma-glutamyl carboxylase activity ; GO:0008488 | inferred from direct assay	Hsap\GGCX
Leuconostoc pseudomesenteroides	3L_1630015_DEL	0.044359	4.32e-13	FBgn0013342	nSyb	neuronal Synaptobrevin	333	3PRIME	-	exocytosis ; GO:0006887 | inferred from biological aspect of ancestor with PANTHER:PTN000473885 <newline> vesicle-mediated transport ; GO:0016192 | inferred from sequence or structural similarity <newline> vesicle-mediated transport ; GO:0016192 | non-traceable author statement <newline> neurotransmitter secretion ; GO:0007269 | non-traceable author statement <newline> vesicle fusion ; GO:0006906…	integral component of membrane ; GO:0016021 | inferred from electronic annotation with InterPro:IPR001388 <newline> synaptic vesicle ; GO:0008021 | colocalizes_with inferred from direct assay <newline> terminal bouton ; GO:0043195 | inferred from direct assay <newline> plasma membrane ; GO:0005886 | inferred from direct assay <newline> SNARE complex ; GO:0031201 | inferred from direct assay <newl…	SNAP receptor activity ; GO:0005484 | inferred from sequence or structural similarity <newline> SNAP receptor activity ; GO:0005484 | inferred from direct assay <newline> SNARE binding ; GO:0000149 | inferred from physical interaction with Snap25, Syx1A <newline> SNAP receptor activity ; GO:0005484 | non-traceable author statement	Hsap\VAMP2 <newline> Hsap\VAMP8 <newline> Hsap\VAMP3 <newline> Hsap\VAMP4 <newline> Hsap\VAMP5 <newline> Hsap\VAMP1 <newline> Hsap\SEC22C <newline> Hsap\SEC22B <newline> Hsap\YKT6 <newline> Hsap\VAMP7
Leuconostoc pseudomesenteroides	3L_1630015_DEL	0.044359	4.32e-13	FBgn0035245	GC	gamma-glutamyl carboxylase	714	5PRIME	-	protein carboxylation ; GO:0018214 | inferred from direct assay <newline> peptidyl-glutamic acid carboxylation ; GO:0017187 | inferred from direct assay	-	gamma-glutamyl carboxylase activity ; GO:0008488 | inferred from direct assay	Hsap\GGCX
Leuconostoc pseudomesenteroides	3L_1630031_SNP	0.044359	7.69e-12	FBgn0013342	nSyb	neuronal Synaptobrevin	317	3PRIME	-	exocytosis ; GO:0006887 | inferred from biological aspect of ancestor with PANTHER:PTN000473885 <newline> vesicle-mediated transport ; GO:0016192 | inferred from sequence or structural similarity <newline> vesicle-mediated transport ; GO:0016192 | non-traceable author statement <newline> neurotransmitter secretion ; GO:0007269 | non-traceable author statement <newline> vesicle fusion ; GO:0006906…	integral component of membrane ; GO:0016021 | inferred from electronic annotation with InterPro:IPR001388 <newline> synaptic vesicle ; GO:0008021 | colocalizes_with inferred from direct assay <newline> terminal bouton ; GO:0043195 | inferred from direct assay <newline> plasma membrane ; GO:0005886 | inferred from direct assay <newline> SNARE complex ; GO:0031201 | inferred from direct assay <newl…	SNAP receptor activity ; GO:0005484 | inferred from sequence or structural similarity <newline> SNAP receptor activity ; GO:0005484 | inferred from direct assay <newline> SNARE binding ; GO:0000149 | inferred from physical interaction with Snap25, Syx1A <newline> SNAP receptor activity ; GO:0005484 | non-traceable author statement	Hsap\VAMP2 <newline> Hsap\VAMP8 <newline> Hsap\VAMP3 <newline> Hsap\VAMP4 <newline> Hsap\VAMP5 <newline> Hsap\VAMP1 <newline> Hsap\SEC22C <newline> Hsap\SEC22B <newline> Hsap\YKT6 <newline> Hsap\VAMP7
Leuconostoc pseudomesenteroides	3L_1630031_SNP	0.044359	7.69e-12	FBgn0035245	GC	gamma-glutamyl carboxylase	730	5PRIME	-	protein carboxylation ; GO:0018214 | inferred from direct assay <newline> peptidyl-glutamic acid carboxylation ; GO:0017187 | inferred from direct assay	-	gamma-glutamyl carboxylase activity ; GO:0008488 | inferred from direct assay	Hsap\GGCX
Leuconostoc pseudomesenteroides	3L_1630105_SNP	0.044359	1.14e-07	FBgn0013342	nSyb	neuronal Synaptobrevin	243	3PRIME	-	exocytosis ; GO:0006887 | inferred from biological aspect of ancestor with PANTHER:PTN000473885 <newline> vesicle-mediated transport ; GO:0016192 | inferred from sequence or structural similarity <newline> vesicle-mediated transport ; GO:0016192 | non-traceable author statement <newline> neurotransmitter secretion ; GO:0007269 | non-traceable author statement <newline> vesicle fusion ; GO:0006906…	integral component of membrane ; GO:0016021 | inferred from electronic annotation with InterPro:IPR001388 <newline> synaptic vesicle ; GO:0008021 | colocalizes_with inferred from direct assay <newline> terminal bouton ; GO:0043195 | inferred from direct assay <newline> plasma membrane ; GO:0005886 | inferred from direct assay <newline> SNARE complex ; GO:0031201 | inferred from direct assay <newl…	SNAP receptor activity ; GO:0005484 | inferred from sequence or structural similarity <newline> SNAP receptor activity ; GO:0005484 | inferred from direct assay <newline> SNARE binding ; GO:0000149 | inferred from physical interaction with Snap25, Syx1A <newline> SNAP receptor activity ; GO:0005484 | non-traceable author statement	Hsap\VAMP2 <newline> Hsap\VAMP8 <newline> Hsap\VAMP3 <newline> Hsap\VAMP4 <newline> Hsap\VAMP5 <newline> Hsap\VAMP1 <newline> Hsap\SEC22C <newline> Hsap\SEC22B <newline> Hsap\YKT6 <newline> Hsap\VAMP7
Leuconostoc pseudomesenteroides	3L_1630105_SNP	0.044359	1.14e-07	FBgn0035245	GC	gamma-glutamyl carboxylase	804	5PRIME	-	protein carboxylation ; GO:0018214 | inferred from direct assay <newline> peptidyl-glutamic acid carboxylation ; GO:0017187 | inferred from direct assay	-	gamma-glutamyl carboxylase activity ; GO:0008488 | inferred from direct assay	Hsap\GGCX
Leuconostoc pseudomesenteroides	3L_1630157_SNP	0.044359	1.52e-12	FBgn0013342	nSyb	neuronal Synaptobrevin	191	3PRIME	-	exocytosis ; GO:0006887 | inferred from biological aspect of ancestor with PANTHER:PTN000473885 <newline> vesicle-mediated transport ; GO:0016192 | inferred from sequence or structural similarity <newline> vesicle-mediated transport ; GO:0016192 | non-traceable author statement <newline> neurotransmitter secretion ; GO:0007269 | non-traceable author statement <newline> vesicle fusion ; GO:0006906…	integral component of membrane ; GO:0016021 | inferred from electronic annotation with InterPro:IPR001388 <newline> synaptic vesicle ; GO:0008021 | colocalizes_with inferred from direct assay <newline> terminal bouton ; GO:0043195 | inferred from direct assay <newline> plasma membrane ; GO:0005886 | inferred from direct assay <newline> SNARE complex ; GO:0031201 | inferred from direct assay <newl…	SNAP receptor activity ; GO:0005484 | inferred from sequence or structural similarity <newline> SNAP receptor activity ; GO:0005484 | inferred from direct assay <newline> SNARE binding ; GO:0000149 | inferred from physical interaction with Snap25, Syx1A <newline> SNAP receptor activity ; GO:0005484 | non-traceable author statement	Hsap\VAMP2 <newline> Hsap\VAMP8 <newline> Hsap\VAMP3 <newline> Hsap\VAMP4 <newline> Hsap\VAMP5 <newline> Hsap\VAMP1 <newline> Hsap\SEC22C <newline> Hsap\SEC22B <newline> Hsap\YKT6 <newline> Hsap\VAMP7
Leuconostoc pseudomesenteroides	3L_1630157_SNP	0.044359	1.52e-12	FBgn0035245	GC	gamma-glutamyl carboxylase	856	5PRIME	-	protein carboxylation ; GO:0018214 | inferred from direct assay <newline> peptidyl-glutamic acid carboxylation ; GO:0017187 | inferred from direct assay	-	gamma-glutamyl carboxylase activity ; GO:0008488 | inferred from direct assay	Hsap\GGCX
Leuconostoc pseudomesenteroides	3L_1630239_SNP	0.044359	1.04e-11	FBgn0013342	nSyb	neuronal Synaptobrevin	109	3PRIME	-	exocytosis ; GO:0006887 | inferred from biological aspect of ancestor with PANTHER:PTN000473885 <newline> vesicle-mediated transport ; GO:0016192 | inferred from sequence or structural similarity <newline> vesicle-mediated transport ; GO:0016192 | non-traceable author statement <newline> neurotransmitter secretion ; GO:0007269 | non-traceable author statement <newline> vesicle fusion ; GO:0006906…	integral component of membrane ; GO:0016021 | inferred from electronic annotation with InterPro:IPR001388 <newline> synaptic vesicle ; GO:0008021 | colocalizes_with inferred from direct assay <newline> terminal bouton ; GO:0043195 | inferred from direct assay <newline> plasma membrane ; GO:0005886 | inferred from direct assay <newline> SNARE complex ; GO:0031201 | inferred from direct assay <newl…	SNAP receptor activity ; GO:0005484 | inferred from sequence or structural similarity <newline> SNAP receptor activity ; GO:0005484 | inferred from direct assay <newline> SNARE binding ; GO:0000149 | inferred from physical interaction with Snap25, Syx1A <newline> SNAP receptor activity ; GO:0005484 | non-traceable author statement	Hsap\VAMP2 <newline> Hsap\VAMP8 <newline> Hsap\VAMP3 <newline> Hsap\VAMP4 <newline> Hsap\VAMP5 <newline> Hsap\VAMP1 <newline> Hsap\SEC22C <newline> Hsap\SEC22B <newline> Hsap\YKT6 <newline> Hsap\VAMP7
Leuconostoc pseudomesenteroides	3L_1630239_SNP	0.044359	1.04e-11	FBgn0035245	GC	gamma-glutamyl carboxylase	938	5PRIME	-	protein carboxylation ; GO:0018214 | inferred from direct assay <newline> peptidyl-glutamic acid carboxylation ; GO:0017187 | inferred from direct assay	-	gamma-glutamyl carboxylase activity ; GO:0008488 | inferred from direct assay	Hsap\GGCX
Leuconostoc pseudomesenteroides	3L_1630271_SNP	0.044359	4.47e-08	FBgn0013342	nSyb	neuronal Synaptobrevin	77	3PRIME	-	exocytosis ; GO:0006887 | inferred from biological aspect of ancestor with PANTHER:PTN000473885 <newline> vesicle-mediated transport ; GO:0016192 | inferred from sequence or structural similarity <newline> vesicle-mediated transport ; GO:0016192 | non-traceable author statement <newline> neurotransmitter secretion ; GO:0007269 | non-traceable author statement <newline> vesicle fusion ; GO:0006906…	integral component of membrane ; GO:0016021 | inferred from electronic annotation with InterPro:IPR001388 <newline> synaptic vesicle ; GO:0008021 | colocalizes_with inferred from direct assay <newline> terminal bouton ; GO:0043195 | inferred from direct assay <newline> plasma membrane ; GO:0005886 | inferred from direct assay <newline> SNARE complex ; GO:0031201 | inferred from direct assay <newl…	SNAP receptor activity ; GO:0005484 | inferred from sequence or structural similarity <newline> SNAP receptor activity ; GO:0005484 | inferred from direct assay <newline> SNARE binding ; GO:0000149 | inferred from physical interaction with Snap25, Syx1A <newline> SNAP receptor activity ; GO:0005484 | non-traceable author statement	Hsap\VAMP2 <newline> Hsap\VAMP8 <newline> Hsap\VAMP3 <newline> Hsap\VAMP4 <newline> Hsap\VAMP5 <newline> Hsap\VAMP1 <newline> Hsap\SEC22C <newline> Hsap\SEC22B <newline> Hsap\YKT6 <newline> Hsap\VAMP7
Leuconostoc pseudomesenteroides	3L_1630271_SNP	0.044359	4.47e-08	FBgn0035245	GC	gamma-glutamyl carboxylase	970	5PRIME	-	protein carboxylation ; GO:0018214 | inferred from direct assay <newline> peptidyl-glutamic acid carboxylation ; GO:0017187 | inferred from direct assay	-	gamma-glutamyl carboxylase activity ; GO:0008488 | inferred from direct assay	Hsap\GGCX
Leuconostoc pseudomesenteroides	3L_1630570_SNP	0.044359	3.95e-11	FBgn0013342	nSyb	neuronal Synaptobrevin	0	EXON	-	exocytosis ; GO:0006887 | inferred from biological aspect of ancestor with PANTHER:PTN000473885 <newline> vesicle-mediated transport ; GO:0016192 | inferred from sequence or structural similarity <newline> vesicle-mediated transport ; GO:0016192 | non-traceable author statement <newline> neurotransmitter secretion ; GO:0007269 | non-traceable author statement <newline> vesicle fusion ; GO:0006906…	integral component of membrane ; GO:0016021 | inferred from electronic annotation with InterPro:IPR001388 <newline> synaptic vesicle ; GO:0008021 | colocalizes_with inferred from direct assay <newline> terminal bouton ; GO:0043195 | inferred from direct assay <newline> plasma membrane ; GO:0005886 | inferred from direct assay <newline> SNARE complex ; GO:0031201 | inferred from direct assay <newl…	SNAP receptor activity ; GO:0005484 | inferred from sequence or structural similarity <newline> SNAP receptor activity ; GO:0005484 | inferred from direct assay <newline> SNARE binding ; GO:0000149 | inferred from physical interaction with Snap25, Syx1A <newline> SNAP receptor activity ; GO:0005484 | non-traceable author statement	Hsap\VAMP2 <newline> Hsap\VAMP8 <newline> Hsap\VAMP3 <newline> Hsap\VAMP4 <newline> Hsap\VAMP5 <newline> Hsap\VAMP1 <newline> Hsap\SEC22C <newline> Hsap\SEC22B <newline> Hsap\YKT6 <newline> Hsap\VAMP7
Leuconostoc pseudomesenteroides	3L_1630925_SNP	0.044359	2.84e-09	FBgn0013342	nSyb	neuronal Synaptobrevin	0	EXON	-	exocytosis ; GO:0006887 | inferred from biological aspect of ancestor with PANTHER:PTN000473885 <newline> vesicle-mediated transport ; GO:0016192 | inferred from sequence or structural similarity <newline> vesicle-mediated transport ; GO:0016192 | non-traceable author statement <newline> neurotransmitter secretion ; GO:0007269 | non-traceable author statement <newline> vesicle fusion ; GO:0006906…	integral component of membrane ; GO:0016021 | inferred from electronic annotation with InterPro:IPR001388 <newline> synaptic vesicle ; GO:0008021 | colocalizes_with inferred from direct assay <newline> terminal bouton ; GO:0043195 | inferred from direct assay <newline> plasma membrane ; GO:0005886 | inferred from direct assay <newline> SNARE complex ; GO:0031201 | inferred from direct assay <newl…	SNAP receptor activity ; GO:0005484 | inferred from sequence or structural similarity <newline> SNAP receptor activity ; GO:0005484 | inferred from direct assay <newline> SNARE binding ; GO:0000149 | inferred from physical interaction with Snap25, Syx1A <newline> SNAP receptor activity ; GO:0005484 | non-traceable author statement	Hsap\VAMP2 <newline> Hsap\VAMP8 <newline> Hsap\VAMP3 <newline> Hsap\VAMP4 <newline> Hsap\VAMP5 <newline> Hsap\VAMP1 <newline> Hsap\SEC22C <newline> Hsap\SEC22B <newline> Hsap\YKT6 <newline> Hsap\VAMP7
Leuconostoc pseudomesenteroides	3L_1631111_SNP	0.044359	1.77e-11	FBgn0013342	nSyb	neuronal Synaptobrevin	0	EXON	-	exocytosis ; GO:0006887 | inferred from biological aspect of ancestor with PANTHER:PTN000473885 <newline> vesicle-mediated transport ; GO:0016192 | inferred from sequence or structural similarity <newline> vesicle-mediated transport ; GO:0016192 | non-traceable author statement <newline> neurotransmitter secretion ; GO:0007269 | non-traceable author statement <newline> vesicle fusion ; GO:0006906…	integral component of membrane ; GO:0016021 | inferred from electronic annotation with InterPro:IPR001388 <newline> synaptic vesicle ; GO:0008021 | colocalizes_with inferred from direct assay <newline> terminal bouton ; GO:0043195 | inferred from direct assay <newline> plasma membrane ; GO:0005886 | inferred from direct assay <newline> SNARE complex ; GO:0031201 | inferred from direct assay <newl…	SNAP receptor activity ; GO:0005484 | inferred from sequence or structural similarity <newline> SNAP receptor activity ; GO:0005484 | inferred from direct assay <newline> SNARE binding ; GO:0000149 | inferred from physical interaction with Snap25, Syx1A <newline> SNAP receptor activity ; GO:0005484 | non-traceable author statement	Hsap\VAMP2 <newline> Hsap\VAMP8 <newline> Hsap\VAMP3 <newline> Hsap\VAMP4 <newline> Hsap\VAMP5 <newline> Hsap\VAMP1 <newline> Hsap\SEC22C <newline> Hsap\SEC22B <newline> Hsap\YKT6 <newline> Hsap\VAMP7
Leuconostoc pseudomesenteroides	3L_1631116_SNP	0.044359	3.02e-12	FBgn0013342	nSyb	neuronal Synaptobrevin	0	EXON	-	exocytosis ; GO:0006887 | inferred from biological aspect of ancestor with PANTHER:PTN000473885 <newline> vesicle-mediated transport ; GO:0016192 | inferred from sequence or structural similarity <newline> vesicle-mediated transport ; GO:0016192 | non-traceable author statement <newline> neurotransmitter secretion ; GO:0007269 | non-traceable author statement <newline> vesicle fusion ; GO:0006906…	integral component of membrane ; GO:0016021 | inferred from electronic annotation with InterPro:IPR001388 <newline> synaptic vesicle ; GO:0008021 | colocalizes_with inferred from direct assay <newline> terminal bouton ; GO:0043195 | inferred from direct assay <newline> plasma membrane ; GO:0005886 | inferred from direct assay <newline> SNARE complex ; GO:0031201 | inferred from direct assay <newl…	SNAP receptor activity ; GO:0005484 | inferred from sequence or structural similarity <newline> SNAP receptor activity ; GO:0005484 | inferred from direct assay <newline> SNARE binding ; GO:0000149 | inferred from physical interaction with Snap25, Syx1A <newline> SNAP receptor activity ; GO:0005484 | non-traceable author statement	Hsap\VAMP2 <newline> Hsap\VAMP8 <newline> Hsap\VAMP3 <newline> Hsap\VAMP4 <newline> Hsap\VAMP5 <newline> Hsap\VAMP1 <newline> Hsap\SEC22C <newline> Hsap\SEC22B <newline> Hsap\YKT6 <newline> Hsap\VAMP7
Leuconostoc pseudomesenteroides	3L_1631626_SNP	0.044359	3.69e-08	FBgn0013342	nSyb	neuronal Synaptobrevin	0	EXON	-	exocytosis ; GO:0006887 | inferred from biological aspect of ancestor with PANTHER:PTN000473885 <newline> vesicle-mediated transport ; GO:0016192 | inferred from sequence or structural similarity <newline> vesicle-mediated transport ; GO:0016192 | non-traceable author statement <newline> neurotransmitter secretion ; GO:0007269 | non-traceable author statement <newline> vesicle fusion ; GO:0006906…	integral component of membrane ; GO:0016021 | inferred from electronic annotation with InterPro:IPR001388 <newline> synaptic vesicle ; GO:0008021 | colocalizes_with inferred from direct assay <newline> terminal bouton ; GO:0043195 | inferred from direct assay <newline> plasma membrane ; GO:0005886 | inferred from direct assay <newline> SNARE complex ; GO:0031201 | inferred from direct assay <newl…	SNAP receptor activity ; GO:0005484 | inferred from sequence or structural similarity <newline> SNAP receptor activity ; GO:0005484 | inferred from direct assay <newline> SNARE binding ; GO:0000149 | inferred from physical interaction with Snap25, Syx1A <newline> SNAP receptor activity ; GO:0005484 | non-traceable author statement	Hsap\VAMP2 <newline> Hsap\VAMP8 <newline> Hsap\VAMP3 <newline> Hsap\VAMP4 <newline> Hsap\VAMP5 <newline> Hsap\VAMP1 <newline> Hsap\SEC22C <newline> Hsap\SEC22B <newline> Hsap\YKT6 <newline> Hsap\VAMP7
Leuconostoc pseudomesenteroides	3L_1631785_SNP	0.044359	2.81e-09	FBgn0013342	nSyb	neuronal Synaptobrevin	0	EXON	-	exocytosis ; GO:0006887 | inferred from biological aspect of ancestor with PANTHER:PTN000473885 <newline> vesicle-mediated transport ; GO:0016192 | inferred from sequence or structural similarity <newline> vesicle-mediated transport ; GO:0016192 | non-traceable author statement <newline> neurotransmitter secretion ; GO:0007269 | non-traceable author statement <newline> vesicle fusion ; GO:0006906…	integral component of membrane ; GO:0016021 | inferred from electronic annotation with InterPro:IPR001388 <newline> synaptic vesicle ; GO:0008021 | colocalizes_with inferred from direct assay <newline> terminal bouton ; GO:0043195 | inferred from direct assay <newline> plasma membrane ; GO:0005886 | inferred from direct assay <newline> SNARE complex ; GO:0031201 | inferred from direct assay <newl…	SNAP receptor activity ; GO:0005484 | inferred from sequence or structural similarity <newline> SNAP receptor activity ; GO:0005484 | inferred from direct assay <newline> SNARE binding ; GO:0000149 | inferred from physical interaction with Snap25, Syx1A <newline> SNAP receptor activity ; GO:0005484 | non-traceable author statement	Hsap\VAMP2 <newline> Hsap\VAMP8 <newline> Hsap\VAMP3 <newline> Hsap\VAMP4 <newline> Hsap\VAMP5 <newline> Hsap\VAMP1 <newline> Hsap\SEC22C <newline> Hsap\SEC22B <newline> Hsap\YKT6 <newline> Hsap\VAMP7
Leuconostoc pseudomesenteroides	3L_1631830_SNP	0.044359	1.07e-09	FBgn0013342	nSyb	neuronal Synaptobrevin	0	EXON	-	exocytosis ; GO:0006887 | inferred from biological aspect of ancestor with PANTHER:PTN000473885 <newline> vesicle-mediated transport ; GO:0016192 | inferred from sequence or structural similarity <newline> vesicle-mediated transport ; GO:0016192 | non-traceable author statement <newline> neurotransmitter secretion ; GO:0007269 | non-traceable author statement <newline> vesicle fusion ; GO:0006906…	integral component of membrane ; GO:0016021 | inferred from electronic annotation with InterPro:IPR001388 <newline> synaptic vesicle ; GO:0008021 | colocalizes_with inferred from direct assay <newline> terminal bouton ; GO:0043195 | inferred from direct assay <newline> plasma membrane ; GO:0005886 | inferred from direct assay <newline> SNARE complex ; GO:0031201 | inferred from direct assay <newl…	SNAP receptor activity ; GO:0005484 | inferred from sequence or structural similarity <newline> SNAP receptor activity ; GO:0005484 | inferred from direct assay <newline> SNARE binding ; GO:0000149 | inferred from physical interaction with Snap25, Syx1A <newline> SNAP receptor activity ; GO:0005484 | non-traceable author statement	Hsap\VAMP2 <newline> Hsap\VAMP8 <newline> Hsap\VAMP3 <newline> Hsap\VAMP4 <newline> Hsap\VAMP5 <newline> Hsap\VAMP1 <newline> Hsap\SEC22C <newline> Hsap\SEC22B <newline> Hsap\YKT6 <newline> Hsap\VAMP7
Leuconostoc pseudomesenteroides	3L_1632260_SNP	0.044359	7.14e-10	FBgn0013342	nSyb	neuronal Synaptobrevin	0	EXON	-	exocytosis ; GO:0006887 | inferred from biological aspect of ancestor with PANTHER:PTN000473885 <newline> vesicle-mediated transport ; GO:0016192 | inferred from sequence or structural similarity <newline> vesicle-mediated transport ; GO:0016192 | non-traceable author statement <newline> neurotransmitter secretion ; GO:0007269 | non-traceable author statement <newline> vesicle fusion ; GO:0006906…	integral component of membrane ; GO:0016021 | inferred from electronic annotation with InterPro:IPR001388 <newline> synaptic vesicle ; GO:0008021 | colocalizes_with inferred from direct assay <newline> terminal bouton ; GO:0043195 | inferred from direct assay <newline> plasma membrane ; GO:0005886 | inferred from direct assay <newline> SNARE complex ; GO:0031201 | inferred from direct assay <newl…	SNAP receptor activity ; GO:0005484 | inferred from sequence or structural similarity <newline> SNAP receptor activity ; GO:0005484 | inferred from direct assay <newline> SNARE binding ; GO:0000149 | inferred from physical interaction with Snap25, Syx1A <newline> SNAP receptor activity ; GO:0005484 | non-traceable author statement	Hsap\VAMP2 <newline> Hsap\VAMP8 <newline> Hsap\VAMP3 <newline> Hsap\VAMP4 <newline> Hsap\VAMP5 <newline> Hsap\VAMP1 <newline> Hsap\SEC22C <newline> Hsap\SEC22B <newline> Hsap\YKT6 <newline> Hsap\VAMP7
Leuconostoc pseudomesenteroides	3L_1632743_SNP	0.044359	1.21e-08	FBgn0013342	nSyb	neuronal Synaptobrevin	0	INTRON	-	exocytosis ; GO:0006887 | inferred from biological aspect of ancestor with PANTHER:PTN000473885 <newline> vesicle-mediated transport ; GO:0016192 | inferred from sequence or structural similarity <newline> vesicle-mediated transport ; GO:0016192 | non-traceable author statement <newline> neurotransmitter secretion ; GO:0007269 | non-traceable author statement <newline> vesicle fusion ; GO:0006906…	integral component of membrane ; GO:0016021 | inferred from electronic annotation with InterPro:IPR001388 <newline> synaptic vesicle ; GO:0008021 | colocalizes_with inferred from direct assay <newline> terminal bouton ; GO:0043195 | inferred from direct assay <newline> plasma membrane ; GO:0005886 | inferred from direct assay <newline> SNARE complex ; GO:0031201 | inferred from direct assay <newl…	SNAP receptor activity ; GO:0005484 | inferred from sequence or structural similarity <newline> SNAP receptor activity ; GO:0005484 | inferred from direct assay <newline> SNARE binding ; GO:0000149 | inferred from physical interaction with Snap25, Syx1A <newline> SNAP receptor activity ; GO:0005484 | non-traceable author statement	Hsap\VAMP2 <newline> Hsap\VAMP8 <newline> Hsap\VAMP3 <newline> Hsap\VAMP4 <newline> Hsap\VAMP5 <newline> Hsap\VAMP1 <newline> Hsap\SEC22C <newline> Hsap\SEC22B <newline> Hsap\YKT6 <newline> Hsap\VAMP7
Leuconostoc pseudomesenteroides	3L_1633154_SNP	0.044359	2.27e-08	FBgn0013342	nSyb	neuronal Synaptobrevin	0	EXON	-	exocytosis ; GO:0006887 | inferred from biological aspect of ancestor with PANTHER:PTN000473885 <newline> vesicle-mediated transport ; GO:0016192 | inferred from sequence or structural similarity <newline> vesicle-mediated transport ; GO:0016192 | non-traceable author statement <newline> neurotransmitter secretion ; GO:0007269 | non-traceable author statement <newline> vesicle fusion ; GO:0006906…	integral component of membrane ; GO:0016021 | inferred from electronic annotation with InterPro:IPR001388 <newline> synaptic vesicle ; GO:0008021 | colocalizes_with inferred from direct assay <newline> terminal bouton ; GO:0043195 | inferred from direct assay <newline> plasma membrane ; GO:0005886 | inferred from direct assay <newline> SNARE complex ; GO:0031201 | inferred from direct assay <newl…	SNAP receptor activity ; GO:0005484 | inferred from sequence or structural similarity <newline> SNAP receptor activity ; GO:0005484 | inferred from direct assay <newline> SNARE binding ; GO:0000149 | inferred from physical interaction with Snap25, Syx1A <newline> SNAP receptor activity ; GO:0005484 | non-traceable author statement	Hsap\VAMP2 <newline> Hsap\VAMP8 <newline> Hsap\VAMP3 <newline> Hsap\VAMP4 <newline> Hsap\VAMP5 <newline> Hsap\VAMP1 <newline> Hsap\SEC22C <newline> Hsap\SEC22B <newline> Hsap\YKT6 <newline> Hsap\VAMP7
Leuconostoc pseudomesenteroides	3L_1633920_SNP	0.044359	9.4e-09	FBgn0013342	nSyb	neuronal Synaptobrevin	0	INTRON	-	exocytosis ; GO:0006887 | inferred from biological aspect of ancestor with PANTHER:PTN000473885 <newline> vesicle-mediated transport ; GO:0016192 | inferred from sequence or structural similarity <newline> vesicle-mediated transport ; GO:0016192 | non-traceable author statement <newline> neurotransmitter secretion ; GO:0007269 | non-traceable author statement <newline> vesicle fusion ; GO:0006906…	integral component of membrane ; GO:0016021 | inferred from electronic annotation with InterPro:IPR001388 <newline> synaptic vesicle ; GO:0008021 | colocalizes_with inferred from direct assay <newline> terminal bouton ; GO:0043195 | inferred from direct assay <newline> plasma membrane ; GO:0005886 | inferred from direct assay <newline> SNARE complex ; GO:0031201 | inferred from direct assay <newl…	SNAP receptor activity ; GO:0005484 | inferred from sequence or structural similarity <newline> SNAP receptor activity ; GO:0005484 | inferred from direct assay <newline> SNARE binding ; GO:0000149 | inferred from physical interaction with Snap25, Syx1A <newline> SNAP receptor activity ; GO:0005484 | non-traceable author statement	Hsap\VAMP2 <newline> Hsap\VAMP8 <newline> Hsap\VAMP3 <newline> Hsap\VAMP4 <newline> Hsap\VAMP5 <newline> Hsap\VAMP1 <newline> Hsap\SEC22C <newline> Hsap\SEC22B <newline> Hsap\YKT6 <newline> Hsap\VAMP7
Leuconostoc pseudomesenteroides	3L_1634298_SNP	0.044359	4.01e-08	FBgn0013342	nSyb	neuronal Synaptobrevin	0	INTRON	-	exocytosis ; GO:0006887 | inferred from biological aspect of ancestor with PANTHER:PTN000473885 <newline> vesicle-mediated transport ; GO:0016192 | inferred from sequence or structural similarity <newline> vesicle-mediated transport ; GO:0016192 | non-traceable author statement <newline> neurotransmitter secretion ; GO:0007269 | non-traceable author statement <newline> vesicle fusion ; GO:0006906…	integral component of membrane ; GO:0016021 | inferred from electronic annotation with InterPro:IPR001388 <newline> synaptic vesicle ; GO:0008021 | colocalizes_with inferred from direct assay <newline> terminal bouton ; GO:0043195 | inferred from direct assay <newline> plasma membrane ; GO:0005886 | inferred from direct assay <newline> SNARE complex ; GO:0031201 | inferred from direct assay <newl…	SNAP receptor activity ; GO:0005484 | inferred from sequence or structural similarity <newline> SNAP receptor activity ; GO:0005484 | inferred from direct assay <newline> SNARE binding ; GO:0000149 | inferred from physical interaction with Snap25, Syx1A <newline> SNAP receptor activity ; GO:0005484 | non-traceable author statement	Hsap\VAMP2 <newline> Hsap\VAMP8 <newline> Hsap\VAMP3 <newline> Hsap\VAMP4 <newline> Hsap\VAMP5 <newline> Hsap\VAMP1 <newline> Hsap\SEC22C <newline> Hsap\SEC22B <newline> Hsap\YKT6 <newline> Hsap\VAMP7
Leuconostoc pseudomesenteroides	3L_1635100_SNP	0.044359	3.14e-09	FBgn0013342	nSyb	neuronal Synaptobrevin	0	INTRON	-	exocytosis ; GO:0006887 | inferred from biological aspect of ancestor with PANTHER:PTN000473885 <newline> vesicle-mediated transport ; GO:0016192 | inferred from sequence or structural similarity <newline> vesicle-mediated transport ; GO:0016192 | non-traceable author statement <newline> neurotransmitter secretion ; GO:0007269 | non-traceable author statement <newline> vesicle fusion ; GO:0006906…	integral component of membrane ; GO:0016021 | inferred from electronic annotation with InterPro:IPR001388 <newline> synaptic vesicle ; GO:0008021 | colocalizes_with inferred from direct assay <newline> terminal bouton ; GO:0043195 | inferred from direct assay <newline> plasma membrane ; GO:0005886 | inferred from direct assay <newline> SNARE complex ; GO:0031201 | inferred from direct assay <newl…	SNAP receptor activity ; GO:0005484 | inferred from sequence or structural similarity <newline> SNAP receptor activity ; GO:0005484 | inferred from direct assay <newline> SNARE binding ; GO:0000149 | inferred from physical interaction with Snap25, Syx1A <newline> SNAP receptor activity ; GO:0005484 | non-traceable author statement	Hsap\VAMP2 <newline> Hsap\VAMP8 <newline> Hsap\VAMP3 <newline> Hsap\VAMP4 <newline> Hsap\VAMP5 <newline> Hsap\VAMP1 <newline> Hsap\SEC22C <newline> Hsap\SEC22B <newline> Hsap\YKT6 <newline> Hsap\VAMP7
Leuconostoc pseudomesenteroides	3L_1635759_SNP	0.044359	6.83e-09	FBgn0013342	nSyb	neuronal Synaptobrevin	0	INTRON	-	exocytosis ; GO:0006887 | inferred from biological aspect of ancestor with PANTHER:PTN000473885 <newline> vesicle-mediated transport ; GO:0016192 | inferred from sequence or structural similarity <newline> vesicle-mediated transport ; GO:0016192 | non-traceable author statement <newline> neurotransmitter secretion ; GO:0007269 | non-traceable author statement <newline> vesicle fusion ; GO:0006906…	integral component of membrane ; GO:0016021 | inferred from electronic annotation with InterPro:IPR001388 <newline> synaptic vesicle ; GO:0008021 | colocalizes_with inferred from direct assay <newline> terminal bouton ; GO:0043195 | inferred from direct assay <newline> plasma membrane ; GO:0005886 | inferred from direct assay <newline> SNARE complex ; GO:0031201 | inferred from direct assay <newl…	SNAP receptor activity ; GO:0005484 | inferred from sequence or structural similarity <newline> SNAP receptor activity ; GO:0005484 | inferred from direct assay <newline> SNARE binding ; GO:0000149 | inferred from physical interaction with Snap25, Syx1A <newline> SNAP receptor activity ; GO:0005484 | non-traceable author statement	Hsap\VAMP2 <newline> Hsap\VAMP8 <newline> Hsap\VAMP3 <newline> Hsap\VAMP4 <newline> Hsap\VAMP5 <newline> Hsap\VAMP1 <newline> Hsap\SEC22C <newline> Hsap\SEC22B <newline> Hsap\YKT6 <newline> Hsap\VAMP7
Leuconostoc pseudomesenteroides	3L_1635887_SNP	0.044359	6.29e-07	FBgn0013342	nSyb	neuronal Synaptobrevin	0	INTRON	-	exocytosis ; GO:0006887 | inferred from biological aspect of ancestor with PANTHER:PTN000473885 <newline> vesicle-mediated transport ; GO:0016192 | inferred from sequence or structural similarity <newline> vesicle-mediated transport ; GO:0016192 | non-traceable author statement <newline> neurotransmitter secretion ; GO:0007269 | non-traceable author statement <newline> vesicle fusion ; GO:0006906…	integral component of membrane ; GO:0016021 | inferred from electronic annotation with InterPro:IPR001388 <newline> synaptic vesicle ; GO:0008021 | colocalizes_with inferred from direct assay <newline> terminal bouton ; GO:0043195 | inferred from direct assay <newline> plasma membrane ; GO:0005886 | inferred from direct assay <newline> SNARE complex ; GO:0031201 | inferred from direct assay <newl…	SNAP receptor activity ; GO:0005484 | inferred from sequence or structural similarity <newline> SNAP receptor activity ; GO:0005484 | inferred from direct assay <newline> SNARE binding ; GO:0000149 | inferred from physical interaction with Snap25, Syx1A <newline> SNAP receptor activity ; GO:0005484 | non-traceable author statement	Hsap\VAMP2 <newline> Hsap\VAMP8 <newline> Hsap\VAMP3 <newline> Hsap\VAMP4 <newline> Hsap\VAMP5 <newline> Hsap\VAMP1 <newline> Hsap\SEC22C <newline> Hsap\SEC22B <newline> Hsap\YKT6 <newline> Hsap\VAMP7
Leuconostoc pseudomesenteroides	3L_1636616_SNP	0.044359	1.86e-07	FBgn0013342	nSyb	neuronal Synaptobrevin	0	INTRON	-	exocytosis ; GO:0006887 | inferred from biological aspect of ancestor with PANTHER:PTN000473885 <newline> vesicle-mediated transport ; GO:0016192 | inferred from sequence or structural similarity <newline> vesicle-mediated transport ; GO:0016192 | non-traceable author statement <newline> neurotransmitter secretion ; GO:0007269 | non-traceable author statement <newline> vesicle fusion ; GO:0006906…	integral component of membrane ; GO:0016021 | inferred from electronic annotation with InterPro:IPR001388 <newline> synaptic vesicle ; GO:0008021 | colocalizes_with inferred from direct assay <newline> terminal bouton ; GO:0043195 | inferred from direct assay <newline> plasma membrane ; GO:0005886 | inferred from direct assay <newline> SNARE complex ; GO:0031201 | inferred from direct assay <newl…	SNAP receptor activity ; GO:0005484 | inferred from sequence or structural similarity <newline> SNAP receptor activity ; GO:0005484 | inferred from direct assay <newline> SNARE binding ; GO:0000149 | inferred from physical interaction with Snap25, Syx1A <newline> SNAP receptor activity ; GO:0005484 | non-traceable author statement	Hsap\VAMP2 <newline> Hsap\VAMP8 <newline> Hsap\VAMP3 <newline> Hsap\VAMP4 <newline> Hsap\VAMP5 <newline> Hsap\VAMP1 <newline> Hsap\SEC22C <newline> Hsap\SEC22B <newline> Hsap\YKT6 <newline> Hsap\VAMP7
Leuconostoc pseudomesenteroides	3L_1637978_SNP	0.044359	1.95e-07	FBgn0013342	nSyb	neuronal Synaptobrevin	226	5PRIME	-	exocytosis ; GO:0006887 | inferred from biological aspect of ancestor with PANTHER:PTN000473885 <newline> vesicle-mediated transport ; GO:0016192 | inferred from sequence or structural similarity <newline> vesicle-mediated transport ; GO:0016192 | non-traceable author statement <newline> neurotransmitter secretion ; GO:0007269 | non-traceable author statement <newline> vesicle fusion ; GO:0006906…	integral component of membrane ; GO:0016021 | inferred from electronic annotation with InterPro:IPR001388 <newline> synaptic vesicle ; GO:0008021 | colocalizes_with inferred from direct assay <newline> terminal bouton ; GO:0043195 | inferred from direct assay <newline> plasma membrane ; GO:0005886 | inferred from direct assay <newline> SNARE complex ; GO:0031201 | inferred from direct assay <newl…	SNAP receptor activity ; GO:0005484 | inferred from sequence or structural similarity <newline> SNAP receptor activity ; GO:0005484 | inferred from direct assay <newline> SNARE binding ; GO:0000149 | inferred from physical interaction with Snap25, Syx1A <newline> SNAP receptor activity ; GO:0005484 | non-traceable author statement	Hsap\VAMP2 <newline> Hsap\VAMP8 <newline> Hsap\VAMP3 <newline> Hsap\VAMP4 <newline> Hsap\VAMP5 <newline> Hsap\VAMP1 <newline> Hsap\SEC22C <newline> Hsap\SEC22B <newline> Hsap\YKT6 <newline> Hsap\VAMP7
Leuconostoc pseudomesenteroides	3L_1637978_SNP	0.044359	1.95e-07	FBgn0035247	metl	methyltransferase-like	0	EXON	-	biological_process ; GO:0008150 | no biological data available	cellular_component ; GO:0005575 | no biological data available	S-adenosylmethionine-dependent methyltransferase activity ; GO:0008757 | inferred from sequence or structural similarity with EMBL:BC006985	Hsap\METTL2A <newline> Hsap\METTL2B <newline> Hsap\METTL8 <newline> Hsap\METTL6
Leuconostoc pseudomesenteroides	3L_1638206_SNP	0.044359	5.81e-08	FBgn0013342	nSyb	neuronal Synaptobrevin	454	5PRIME	-	exocytosis ; GO:0006887 | inferred from biological aspect of ancestor with PANTHER:PTN000473885 <newline> vesicle-mediated transport ; GO:0016192 | inferred from sequence or structural similarity <newline> vesicle-mediated transport ; GO:0016192 | non-traceable author statement <newline> neurotransmitter secretion ; GO:0007269 | non-traceable author statement <newline> vesicle fusion ; GO:0006906…	integral component of membrane ; GO:0016021 | inferred from electronic annotation with InterPro:IPR001388 <newline> synaptic vesicle ; GO:0008021 | colocalizes_with inferred from direct assay <newline> terminal bouton ; GO:0043195 | inferred from direct assay <newline> plasma membrane ; GO:0005886 | inferred from direct assay <newline> SNARE complex ; GO:0031201 | inferred from direct assay <newl…	SNAP receptor activity ; GO:0005484 | inferred from sequence or structural similarity <newline> SNAP receptor activity ; GO:0005484 | inferred from direct assay <newline> SNARE binding ; GO:0000149 | inferred from physical interaction with Snap25, Syx1A <newline> SNAP receptor activity ; GO:0005484 | non-traceable author statement	Hsap\VAMP2 <newline> Hsap\VAMP8 <newline> Hsap\VAMP3 <newline> Hsap\VAMP4 <newline> Hsap\VAMP5 <newline> Hsap\VAMP1 <newline> Hsap\SEC22C <newline> Hsap\SEC22B <newline> Hsap\YKT6 <newline> Hsap\VAMP7
Leuconostoc pseudomesenteroides	3L_1638206_SNP	0.044359	5.81e-08	FBgn0035247	metl	methyltransferase-like	0	EXON	-	biological_process ; GO:0008150 | no biological data available	cellular_component ; GO:0005575 | no biological data available	S-adenosylmethionine-dependent methyltransferase activity ; GO:0008757 | inferred from sequence or structural similarity with EMBL:BC006985	Hsap\METTL2A <newline> Hsap\METTL2B <newline> Hsap\METTL8 <newline> Hsap\METTL6
Acidovorax temperans	2L_14158415_SNP	0.02	4.31e-10	FBgn0028906	CG46301	CG46301	0	EXON	+	biological_process ; GO:0008150 | no biological data available	nucleoplasm ; GO:0005654 | inferred from sequence or structural similarity with HGNC:16106	molecular_function ; GO:0003674 | no biological data available	Hsap\NOL4L <newline> Hsap\NOL4
Microbe Sum	3L_22430444_SNP	0	3.6e-12	XLOC_018697			0	EXON	-

## Sheet: Table S11B
Microbial Species	Variant ID	P-Value	FlyBase Gene ID	FlyBase Gene Symbol	FlyBase Gene Name	Distance From Start (bp)	Site Class	Strand	GO Biological Process	GO Cellular Component	GO Molecular Function	Human Orthologs
Microbe Sum	X_3347122_SNP	5.41e-07	FBgn0266350	CR44999	CR44999	0	INTRON	+	-	-	-	-
Microbe Sum	X_3791153_SNP	5.79e-06	FBgn0260658	CG42541	CG42541	0	INTRON	-	small GTPase mediated signal transduction ; GO:0007264 | inferred from electronic annotation with InterPro:IPR001806 <newline> GTP catabolic process ; GO:0006184 | inferred from electronic annotation with InterPro:IPR020849 <newline> phagocytosis ; GO:0006909 | inferred from mutant phenotype	membrane ; GO:0016020 | inferred from electronic annotation with InterPro:IPR020849	GTP binding ; GO:0005525 | inferred from sequence or structural similarity with EMBL:U91601	-
Microbe Sum	X_13961862_SNP	1.15e-06	Intergenic
Microbe Sum	X_19110696_SNP	9.89e-06	FBgn0031000	Muc18B	Mucin 18B	3	3PRIME	+	chitin metabolic process ; GO:0006030 | inferred from electronic annotation with InterPro:IPR002557	extracellular region ; GO:0005576 | inferred from electronic annotation with InterPro:IPR002557 <newline> extracellular matrix ; GO:0031012 | inferred from sequence model	chitin binding ; GO:0008061 | inferred from electronic annotation with InterPro:IPR002557 <newline> extracellular matrix structural constituent ; GO:0005201 | inferred from sequence model	-
Microbe Sum	X_19110696_SNP	9.89e-06	Intergenic
Microbe Sum	X_20296914_SNP	8.08e-06	FBgn0031114	cactin	cactin	0	EXON	+	dorsal/ventral axis specification ; GO:0009950 | inferred from genetic interaction with cact <newline> defense response ; GO:0006952 | non-traceable author statement <newline> signal transduction ; GO:0007165 | non-traceable author statement <newline> mRNA splicing, via spliceosome ; GO:0000398 | inferred by curator from GO:0071013 <newline> neurogenesis ; GO:0022008 | inferred from mutant phenot…	catalytic step 2 spliceosome ; GO:0071013 | inferred from direct assay	-	Hsap\ENSG00000105298
Microbe Sum	X_20296914_SNP	8.08e-06	FBgn0040650	CG15456	CG15456	544	3PRIME	-	cell redox homeostasis ; GO:0045454 | inferred from electronic annotation with InterPro:IPR011893	-	selenium binding ; GO:0008430 | inferred from electronic annotation with InterPro:IPR011893	Hsap\MIEN1
Microbe Sum	X_20304619_SNP	8.89e-06	FBgn0002641	mal	maroon-like	382	3PRIME	+	ommochrome biosynthetic process ; GO:0006727 | inferred from mutant phenotype <newline> Mo-molybdopterin cofactor biosynthetic process ; GO:0006777 | non-traceable author statement <newline> molybdopterin cofactor metabolic process ; GO:0043545 | inferred from mutant phenotype <newline> Mo-molybdopterin cofactor biosynthetic process ; GO:0006777 | inferred from electronic annotation with InterPro…	cellular_component ; GO:0005575 | no biological data available	Mo-molybdopterin cofactor sulfurase activity ; GO:0008265 | non-traceable author statement <newline> Mo-molybdopterin cofactor sulfurase activity ; GO:0008265 | inferred from mutant phenotype <newline> molybdenum ion binding ; GO:0030151 | inferred from electronic annotation with InterPro:IPR005302 <newline> pyridoxal phosphate binding ; GO:0030170 | inferred from electronic annotation with Inter…	Hsap\MOCOS
Microbe Sum	X_20304619_SNP	8.89e-06	FBgn0031116	CG1695	CG1695	358	5PRIME	+	regulation of Rab GTPase activity ; GO:0032313 | inferred from sequence or structural similarity with Evi5	-	Rab GTPase activator activity ; GO:0005097 | inferred from sequence or structural similarity with Evi5	Hsap\ENSG00000167037 <newline> Hsap\ENSG00000141258
Microbe Sum	X_20304874_SNP	4.88e-06	FBgn0002641	mal	maroon-like	637	3PRIME	+	ommochrome biosynthetic process ; GO:0006727 | inferred from mutant phenotype <newline> Mo-molybdopterin cofactor biosynthetic process ; GO:0006777 | non-traceable author statement <newline> molybdopterin cofactor metabolic process ; GO:0043545 | inferred from mutant phenotype <newline> Mo-molybdopterin cofactor biosynthetic process ; GO:0006777 | inferred from electronic annotation with InterPro…	cellular_component ; GO:0005575 | no biological data available	Mo-molybdopterin cofactor sulfurase activity ; GO:0008265 | non-traceable author statement <newline> Mo-molybdopterin cofactor sulfurase activity ; GO:0008265 | inferred from mutant phenotype <newline> molybdenum ion binding ; GO:0030151 | inferred from electronic annotation with InterPro:IPR005302 <newline> pyridoxal phosphate binding ; GO:0030170 | inferred from electronic annotation with Inter…	Hsap\MOCOS
Microbe Sum	X_20304874_SNP	4.88e-06	FBgn0031116	CG1695	CG1695	103	5PRIME	+	regulation of Rab GTPase activity ; GO:0032313 | inferred from sequence or structural similarity with Evi5	-	Rab GTPase activator activity ; GO:0005097 | inferred from sequence or structural similarity with Evi5	Hsap\ENSG00000167037 <newline> Hsap\ENSG00000141258
Microbe Sum	X_20305619_SNP	8.97e-06	FBgn0031116	CG1695	CG1695	0	INTRON	+	regulation of Rab GTPase activity ; GO:0032313 | inferred from sequence or structural similarity with Evi5	-	Rab GTPase activator activity ; GO:0005097 | inferred from sequence or structural similarity with Evi5	Hsap\ENSG00000167037 <newline> Hsap\ENSG00000141258
Microbe Sum	X_20306283_SNP	4.4e-06	FBgn0031116	CG1695	CG1695	0	INTRON	+	regulation of Rab GTPase activity ; GO:0032313 | inferred from sequence or structural similarity with Evi5	-	Rab GTPase activator activity ; GO:0005097 | inferred from sequence or structural similarity with Evi5	Hsap\ENSG00000167037 <newline> Hsap\ENSG00000141258
Microbe Sum	X_20307490_SNP	9.43e-06	FBgn0031116	CG1695	CG1695	0	INTRON	+	regulation of Rab GTPase activity ; GO:0032313 | inferred from sequence or structural similarity with Evi5	-	Rab GTPase activator activity ; GO:0005097 | inferred from sequence or structural similarity with Evi5	Hsap\ENSG00000167037 <newline> Hsap\ENSG00000141258
Microbe Sum	X_20885684_SNP	2.99e-06	Intergenic
Microbe Sum	X_20885779_SNP	3.36e-06	Intergenic
Microbe Sum	X_21898877_SNP	6.47e-06	FBgn0027279	l(1)G0196	lethal (1) G0196	0	INTRON	+	-	-	acid phosphatase activity ; GO:0003993 | inferred from electronic annotation with InterPro:IPR000560	Hsap\PPIP5K1 <newline> Hsap\ENSG00000145725
Microbe Sum	X_21898929_SNP	6.3e-06	FBgn0027279	l(1)G0196	lethal (1) G0196	0	INTRON	+	-	-	acid phosphatase activity ; GO:0003993 | inferred from electronic annotation with InterPro:IPR000560	Hsap\PPIP5K1 <newline> Hsap\ENSG00000145725
Microbe Sum	2R_7799059_SNP	4.53e-06	FBgn0033667	CG13183	CG13183	0	INTRON	-	regulation of transcription, DNA-templated ; GO:0006355 | inferred from electronic annotation with InterPro:IPR001132	intracellular ; GO:0005622 | inferred from electronic annotation with InterPro:IPR001132	-	-
Microbe Sum	2R_9423743_DEL	6.08e-06	FBgn0011896	tRNA:K2:50C	transfer RNA:lys2:50C	121	5PRIME	-	translation ; GO:0006412 | non-traceable author statement <newline> translation ; GO:0006412 | inferred by curator from GO:0033444	cytosol ; GO:0005829 | non-traceable author statement <newline> cytosol ; GO:0005829 | inferred by curator from GO:0033444	triplet codon-amino acid adaptor activity ; GO:0030533 | non-traceable author statement <newline> AAG codon-amino acid adaptor activity ; GO:0033444 | inferred from sequence model	-
Microbe Sum	2R_9423743_DEL	6.08e-06	Intergenic
Microbe Sum	2R_9423743_DEL	6.08e-06	Intergenic
Microbe Sum	2R_9423743_DEL	6.08e-06	Intergenic
Microbe Sum	2R_10048945_SNP	4.29e-06	FBgn0033900	CG8257	CG8257	178	5PRIME	-	cysteinyl-tRNA aminoacylation ; GO:0006423 | inferred from biological aspect of ancestor with PANTHER:PTN000095308	cytosol ; GO:0005829 | inferred from biological aspect of ancestor with PANTHER:PTN000095308	cysteine-tRNA ligase activity ; GO:0004817 | inferred from sequence or structural similarity with EMBL:AB015589; protein_id:BAA29032 <newline> ATP binding ; GO:0005524 | inferred from electronic annotation with InterPro:IPR009080, InterPro:IPR015273, InterPro:IPR015803 <newline> cysteine-tRNA ligase activity ; GO:0004817 | inferred from biological aspect of ancestor with PANTHER:PTN000095308	Hsap\CARS2
Microbe Sum	2R_10048945_SNP	4.29e-06	FBgn0033901	O-fut1	O-fucosyltransferase 1	0	EXON	+	negative regulation of Notch signaling pathway ; GO:0045746 | inferred from mutant phenotype <newline> endocytosis ; GO:0006897 | inferred from mutant phenotype <newline> protein catabolic process ; GO:0030163 | inferred from mutant phenotype <newline> lateral inhibition ; GO:0046331 | inferred from mutant phenotype <newline> protein O-linked glycosylation ; GO:0006493 | inferred from sequence or…	cytoplasmic vesicle ; GO:0031410 | inferred from direct assay <newline> integral component of Golgi membrane ; GO:0030173 | inferred from sequence or structural similarity <newline> Golgi apparatus ; GO:0005794 | NOT inferred from direct assay <newline> endoplasmic reticulum ; GO:0005783 | inferred from direct assay	Notch binding ; GO:0005112 | inferred from direct assay <newline> fucosyltransferase activity ; GO:0008417 | inferred from sequence or structural similarity with UniProtKB:Q9H488 <newline> fucosyltransferase activity ; GO:0008417 | inferred from sequence or structural similarity <newline> fucosyltransferase activity ; GO:0008417 | inferred from direct assay <newline> fucosyltransferase activity ;…	Hsap\POFUT1
Microbe Sum	2R_12883576_SNP	1.84e-06	FBgn0004580	Cbp53E	Calbindin 53E	14	3PRIME	+	cellular calcium ion homeostasis ; GO:0006874 | inferred from sequence or structural similarity with UniProtKB:P12658	-	calcium ion binding ; GO:0005509 | inferred from sequence or structural similarity with UniProtKB:P12658 <newline> calcium ion binding ; GO:0005509 | traceable author statement <newline> calcium ion binding ; GO:0005509 | non-traceable author statement	Hsap\CALB2 <newline> Hsap\SCGN <newline> Hsap\CALB1
Microbe Sum	2R_12883576_SNP	1.84e-06	FBgn0050461	CG30461	CG30461	0	EXON	-	-	-	-	-
Microbe Sum	2R_12883576_SNP	1.84e-06	FBgn0050462	ste24c	ste24c prenyl protease type I	0	EXON	-	proteolysis ; GO:0006508 | inferred from electronic annotation with InterPro:IPR001915 <newline> spermatogenesis ; GO:0007283 | inferred from mutant phenotype <newline> CAAX-box protein processing ; GO:0071586 | inferred from electronic annotation with InterPro:IPR027057	membrane ; GO:0016020 | inferred from electronic annotation with InterPro:IPR001915	metalloendopeptidase activity ; GO:0004222 | inferred from electronic annotation with InterPro:IPR001915	Hsap\ZMPSTE24
Microbe Sum	2R_18326448_SNP	7.52e-06	Intergenic
Microbe Sum	2R_18372276_SNP	1.75e-06	FBgn0034734	CG4554	CG4554	0	EXON	+	neurogenesis ; GO:0022008 | inferred from mutant phenotype	-	-	Hsap\UTP20
Microbe Sum	2R_18372278_SNP	6.86e-06	FBgn0034734	CG4554	CG4554	0	EXON	+	neurogenesis ; GO:0022008 | inferred from mutant phenotype	-	-	Hsap\UTP20
Microbe Sum	2R_18372337_SNP	7.93e-06	FBgn0034734	CG4554	CG4554	0	EXON	+	neurogenesis ; GO:0022008 | inferred from mutant phenotype	-	-	Hsap\UTP20
Microbe Sum	2R_18373334_SNP	3.43e-07	FBgn0034734	CG4554	CG4554	0	EXON	+	neurogenesis ; GO:0022008 | inferred from mutant phenotype	-	-	Hsap\UTP20
Microbe Sum	2L_898343_SNP	3.77e-06	FBgn0002563	Lsp1beta	Larval serum protein 1 beta	157	5PRIME	+	lateral inhibition ; GO:0046331 | inferred from mutant phenotype	lipid particle ; GO:0005811 | inferred from direct assay <newline> larval serum protein complex ; GO:0005616 | inferred from direct assay <newline> extracellular region ; GO:0005576 | non-traceable author statement	nutrient reservoir activity ; GO:0045735 | non-traceable author statement	-
Microbe Sum	2L_898343_SNP	3.77e-06	FBgn0266887	CR45348	CR45348	293	5PRIME	-	-	-	-	-
Microbe Sum	2L_1732949_SNP	2.17e-08	FBgn0031361	CG17652	CG17652	593	5PRIME	-	phagocytosis ; GO:0006909 | inferred from mutant phenotype	small-subunit processome ; GO:0032040 | inferred from electronic annotation with InterPro:IPR006984	-	Hsap\UTP23
Microbe Sum	2L_1732949_SNP	2.17e-08	FBgn0264494	CG17646	CG17646	0	INTRON	+	triglyceride metabolic process ; GO:0006641 | inferred from mutant phenotype	ATP-binding cassette (ABC) transporter complex ; GO:0043190 | inferred from sequence or structural similarity with EMBL:AY048757	ATP binding ; GO:0005524 | inferred from electronic annotation with InterPro:IPR003439, InterPro:IPR017871, InterPro:IPR020064 <newline> ATPase activity, coupled to transmembrane movement of substances ; GO:0042626 | inferred from sequence or structural similarity with EMBL:AY048757 <newline> transporter activity ; GO:0005215 | inferred from sequence or structural similarity with EMBL:AY048757	Hsap\ABCG4 <newline> Hsap\ENSG00000160179
Microbe Sum	2L_2602846_SNP	2.2e-06	Intergenic
Microbe Sum	3R_1949856_SNP	1.51e-06	FBgn0037402	Vha14-2	Vacuolar H[+] ATPase 14kD subunit 2	0	EXON	+	ATP hydrolysis coupled proton transport ; GO:0015991 | inferred from electronic annotation with InterPro:IPR005772, InterPro:IPR008218 <newline> ATP hydrolysis coupled proton transport ; GO:0015991 | inferred by curator from GO:0033176	vacuolar proton-transporting V-type ATPase, V1 domain ; GO:0000221 | inferred from sequence or structural similarity with UniProtKB:P31478 <newline> vacuolar proton-transporting V-type ATPase, V1 domain ; GO:0000221 | non-traceable author statement <newline> proton-transporting V-type ATPase complex ; GO:0033176 | inferred from sequence or structural similarity with Vha14-1	proton-transporting ATPase activity, rotational mechanism ; GO:0046961 | inferred from electronic annotation with InterPro:IPR005772, InterPro:IPR008218 <newline> proton-transporting ATPase activity, rotational mechanism ; GO:0046961 | contributes_to inferred by curator from GO:0033176	Hsap\ATP6V1F
Microbe Sum	3R_1949857_SNP	1.51e-06	FBgn0037402	Vha14-2	Vacuolar H[+] ATPase 14kD subunit 2	0	EXON	+	ATP hydrolysis coupled proton transport ; GO:0015991 | inferred from electronic annotation with InterPro:IPR005772, InterPro:IPR008218 <newline> ATP hydrolysis coupled proton transport ; GO:0015991 | inferred by curator from GO:0033176	vacuolar proton-transporting V-type ATPase, V1 domain ; GO:0000221 | inferred from sequence or structural similarity with UniProtKB:P31478 <newline> vacuolar proton-transporting V-type ATPase, V1 domain ; GO:0000221 | non-traceable author statement <newline> proton-transporting V-type ATPase complex ; GO:0033176 | inferred from sequence or structural similarity with Vha14-1	proton-transporting ATPase activity, rotational mechanism ; GO:0046961 | inferred from electronic annotation with InterPro:IPR005772, InterPro:IPR008218 <newline> proton-transporting ATPase activity, rotational mechanism ; GO:0046961 | contributes_to inferred by curator from GO:0033176	Hsap\ATP6V1F
Microbe Sum	3R_2088830_SNP	7.98e-06	FBgn0037417	Osi10	Osiris 10	868	5PRIME	+	biological_process ; GO:0008150 | no biological data available	integral component of plasma membrane ; GO:0005887 | inferred from sequence model	molecular_function ; GO:0003674 | no biological data available	-
Microbe Sum	3R_2088830_SNP	7.98e-06	Intergenic
Microbe Sum	3R_2148018_SNP	1.05e-07	FBgn0037427	Osi17	Osiris 17	0	INTRON	+	biological_process ; GO:0008150 | no biological data available	integral component of plasma membrane ; GO:0005887 | inferred from sequence model	molecular_function ; GO:0003674 | no biological data available	-
Microbe Sum	3R_2148018_SNP	1.05e-07	Intergenic
Microbe Sum	3R_3723454_SNP	1.73e-06	FBgn0037529	mRpS9	mitochondrial ribosomal protein S9	0	INTRON	-	translation ; GO:0006412 | inferred from sequence or structural similarity with UniProtKB:P82933	mitochondrial small ribosomal subunit ; GO:0005763 | inferred from sequence or structural similarity with UniProtKB:P82933	structural constituent of ribosome ; GO:0003735 | inferred from sequence or structural similarity with UniProtKB:P82933	Hsap\MRPS9
Microbe Sum	3R_3723454_SNP	1.73e-06	FBgn0260005	wtrw	water witch	0	INTRON	+	response to humidity ; GO:0009270 | inferred from mutant phenotype <newline> calcium ion transport ; GO:0006816 | inferred from sequence or structural similarity <newline> cation transport ; GO:0006812 | inferred from sequence or structural similarity with pyx <newline> transmembrane transport ; GO:0055085 | inferred from electronic annotation with InterPro:IPR005821 <newline> sensory perception …	cation channel complex ; GO:0034703 | inferred from sequence or structural similarity with pyx	calcium channel activity ; GO:0005262 | inferred from sequence or structural similarity <newline> cation channel activity ; GO:0005261 | inferred from sequence or structural similarity with pyx	-
Microbe Sum	3R_3723455_SNP	1.52e-06	FBgn0037529	mRpS9	mitochondrial ribosomal protein S9	0	INTRON	-	translation ; GO:0006412 | inferred from sequence or structural similarity with UniProtKB:P82933	mitochondrial small ribosomal subunit ; GO:0005763 | inferred from sequence or structural similarity with UniProtKB:P82933	structural constituent of ribosome ; GO:0003735 | inferred from sequence or structural similarity with UniProtKB:P82933	Hsap\MRPS9
Microbe Sum	3R_3723455_SNP	1.52e-06	FBgn0260005	wtrw	water witch	0	INTRON	+	response to humidity ; GO:0009270 | inferred from mutant phenotype <newline> calcium ion transport ; GO:0006816 | inferred from sequence or structural similarity <newline> cation transport ; GO:0006812 | inferred from sequence or structural similarity with pyx <newline> transmembrane transport ; GO:0055085 | inferred from electronic annotation with InterPro:IPR005821 <newline> sensory perception …	cation channel complex ; GO:0034703 | inferred from sequence or structural similarity with pyx	calcium channel activity ; GO:0005262 | inferred from sequence or structural similarity <newline> cation channel activity ; GO:0005261 | inferred from sequence or structural similarity with pyx	-
Microbe Sum	3R_3729269_SNP	5.18e-06	FBgn0037529	mRpS9	mitochondrial ribosomal protein S9	880	5PRIME	-	translation ; GO:0006412 | inferred from sequence or structural similarity with UniProtKB:P82933	mitochondrial small ribosomal subunit ; GO:0005763 | inferred from sequence or structural similarity with UniProtKB:P82933	structural constituent of ribosome ; GO:0003735 | inferred from sequence or structural similarity with UniProtKB:P82933	Hsap\MRPS9
Microbe Sum	3R_3729269_SNP	5.18e-06	FBgn0037530	CG2943	CG2943	0	EXON	-	-	ER membrane protein complex ; GO:0072546 | inferred from electronic annotation with InterPro:IPR026895	-	Hsap\KIAA0090
Microbe Sum	3R_3729481_SNP	3.98e-07	FBgn0037530	CG2943	CG2943	0	EXON	-	-	ER membrane protein complex ; GO:0072546 | inferred from electronic annotation with InterPro:IPR026895	-	Hsap\KIAA0090
Microbe Sum	3R_3729523_SNP	5.37e-07	FBgn0037530	CG2943	CG2943	0	EXON	-	-	ER membrane protein complex ; GO:0072546 | inferred from electronic annotation with InterPro:IPR026895	-	Hsap\KIAA0090
Microbe Sum	3R_3729623_SNP	1.62e-07	FBgn0037530	CG2943	CG2943	0	INTRON	-	-	ER membrane protein complex ; GO:0072546 | inferred from electronic annotation with InterPro:IPR026895	-	Hsap\KIAA0090
Microbe Sum	3R_3729665_SNP	3.6e-08	FBgn0037530	CG2943	CG2943	0	INTRON	-	-	ER membrane protein complex ; GO:0072546 | inferred from electronic annotation with InterPro:IPR026895	-	Hsap\KIAA0090
Microbe Sum	3R_3729905_DEL	1.82e-07	FBgn0037530	CG2943	CG2943	0	INTRON	-	-	ER membrane protein complex ; GO:0072546 | inferred from electronic annotation with InterPro:IPR026895	-	Hsap\KIAA0090
Microbe Sum	3R_3824016_SNP	8.49e-06	FBgn0267817			0	EXON	-
Microbe Sum	3R_3824016_SNP	8.49e-06	FBgn0267818			859	5PRIME	-
Microbe Sum	3R_4868519_SNP	9.32e-06	FBgn0010222	Nmdmc	NAD-dependent methylenetetrahydrofolate dehydrogenase	0	INTRON	-	10-formyltetrahydrofolate metabolic process ; GO:0009256 | inferred from sequence or structural similarity with UniProtKB:P13995 <newline> carbohydrate metabolic process ; GO:0005975 | inferred from sequence or structural similarity with UniProtKB:P13995 <newline> oxidation-reduction process ; GO:0055114 | inferred from electronic annotation with InterPro:IPR000672, InterPro:IPR020630, InterPro:I…	mitochondrion ; GO:0005739 | inferred from sequence or structural similarity <newline> mitochondrion ; GO:0005739 | non-traceable author statement <newline> mitochondrion ; GO:0005739 | inferred from sequence or structural similarity with UniProtKB:P13995 <newline> mitochondrion ; GO:0005739 | inferred from biological aspect of ancestor with PANTHER:PTN000002327 <newline> cytosol ; GO:0005829 | N…	methenyltetrahydrofolate cyclohydrolase activity ; GO:0004477 | inferred from sequence or structural similarity <newline> methenyltetrahydrofolate cyclohydrolase activity ; GO:0004477 | inferred from sequence or structural similarity with UniProtKB:P18155 <newline> methylenetetrahydrofolate dehydrogenase (NADP+) activity ; GO:0004488 | inferred from sequence or structural similarity with UniProtK…	Hsap\ENSG00000163738 <newline> Hsap\MTHFD2
Microbe Sum	3R_4868519_SNP	9.32e-06	FBgn0037657	hyx	hyrax	448	3PRIME	+	positive regulation of smoothened signaling pathway ; GO:0045880 | inferred from mutant phenotype inferred from genetic interaction with ptc inferred from genetic interaction with ci <newline> positive regulation of transcription, DNA-templated ; GO:0045893 | inferred from mutant phenotype <newline> chaeta morphogenesis ; GO:0008407 | inferred from mutant phenotype <newline> compound eye morphoge…	protein complex ; GO:0043234 | inferred from physical interaction with ci <newline> Cdc73/Paf1 complex ; GO:0016593 | inferred from direct assay <newline> nucleus ; GO:0005634 | inferred from direct assay	transcription factor binding ; GO:0008134 | inferred from physical interaction with ci	Hsap\CDC73
Microbe Sum	3R_4868538_SNP	9.61e-06	FBgn0010222	Nmdmc	NAD-dependent methylenetetrahydrofolate dehydrogenase	0	INTRON	-	10-formyltetrahydrofolate metabolic process ; GO:0009256 | inferred from sequence or structural similarity with UniProtKB:P13995 <newline> carbohydrate metabolic process ; GO:0005975 | inferred from sequence or structural similarity with UniProtKB:P13995 <newline> oxidation-reduction process ; GO:0055114 | inferred from electronic annotation with InterPro:IPR000672, InterPro:IPR020630, InterPro:I…	mitochondrion ; GO:0005739 | inferred from sequence or structural similarity <newline> mitochondrion ; GO:0005739 | non-traceable author statement <newline> mitochondrion ; GO:0005739 | inferred from sequence or structural similarity with UniProtKB:P13995 <newline> mitochondrion ; GO:0005739 | inferred from biological aspect of ancestor with PANTHER:PTN000002327 <newline> cytosol ; GO:0005829 | N…	methenyltetrahydrofolate cyclohydrolase activity ; GO:0004477 | inferred from sequence or structural similarity <newline> methenyltetrahydrofolate cyclohydrolase activity ; GO:0004477 | inferred from sequence or structural similarity with UniProtKB:P18155 <newline> methylenetetrahydrofolate dehydrogenase (NADP+) activity ; GO:0004488 | inferred from sequence or structural similarity with UniProtK…	Hsap\ENSG00000163738 <newline> Hsap\MTHFD2
Microbe Sum	3R_4868538_SNP	9.61e-06	FBgn0037657	hyx	hyrax	467	3PRIME	+	positive regulation of smoothened signaling pathway ; GO:0045880 | inferred from mutant phenotype inferred from genetic interaction with ptc inferred from genetic interaction with ci <newline> positive regulation of transcription, DNA-templated ; GO:0045893 | inferred from mutant phenotype <newline> chaeta morphogenesis ; GO:0008407 | inferred from mutant phenotype <newline> compound eye morphoge…	protein complex ; GO:0043234 | inferred from physical interaction with ci <newline> Cdc73/Paf1 complex ; GO:0016593 | inferred from direct assay <newline> nucleus ; GO:0005634 | inferred from direct assay	transcription factor binding ; GO:0008134 | inferred from physical interaction with ci	Hsap\CDC73
Microbe Sum	3R_5028609_SNP	9.72e-06	FBgn0003165	pum	pumilio	0	INTRON	-	regulation of synaptic transmission ; GO:0050804 | inferred from mutant phenotype <newline> head involution ; GO:0008258 | inferred from mutant phenotype <newline> long-term memory ; GO:0007616 | inferred from mutant phenotype <newline> cell fate determination ; GO:0001709 | traceable author statement <newline> germ cell development ; GO:0007281 | traceable author statement <newline> germ-line st…	cytoplasm ; GO:0005737 | non-traceable author statement <newline> cytoplasm ; GO:0005737 | inferred from direct assay <newline> type Is terminal bouton ; GO:0061177 | inferred from direct assay <newline> type Ib terminal bouton ; GO:0061176 | inferred from direct assay <newline> neuromuscular junction ; GO:0031594 | inferred from direct assay <newline> muscle cell postsynaptic density ; GO:009748…	mRNA 3'-UTR binding ; GO:0003730 | traceable author statement <newline> translation repressor activity, nucleic acid binding ; GO:0000900 | traceable author statement <newline> mRNA 3'-UTR binding ; GO:0003730 | inferred from direct assay <newline> RNA binding ; GO:0003723 | inferred from physical interaction with dlg1 inferred from physical interaction with Ace	Hsap\ENSG00000055917 <newline> Hsap\PUM1
Microbe Sum	3R_5028609_SNP	9.72e-06	Intergenic
Microbe Sum	3R_5028609_SNP	9.72e-06	Intergenic
Microbe Sum	3R_5028609_SNP	9.72e-06	XLOC_023555			0	EXON	-
Microbe Sum	3R_5984280_SNP	6.37e-06	FBgn0037794	CG6254	CG6254	586	3PRIME	-	-	nucleus ; GO:0005634 | inferred from electronic annotation with InterPro:IPR012934	zinc ion binding ; GO:0008270 | inferred from electronic annotation with InterPro:IPR007087, InterPro:IPR012934, InterPro:IPR015880 <newline> nucleic acid binding ; GO:0003676 | inferred from electronic annotation with InterPro:IPR013087	-
Microbe Sum	3R_5984280_SNP	6.37e-06	FBgn0086359	Invadolysin	Invadolysin	0	EXON	+	mitotic chromosome condensation ; GO:0007076 | inferred from mutant phenotype <newline> imaginal disc development ; GO:0007444 | inferred from mutant phenotype <newline> brain development ; GO:0007420 | inferred from mutant phenotype <newline> chromatin remodeling ; GO:0006338 | inferred from mutant phenotype <newline> mitotic spindle organization ; GO:0007052 | inferred from mutant phenotype <ne…	cell leading edge ; GO:0031252 | inferred from sequence or structural similarity with UniProtKB:Q96KR4 <newline> cytoplasm ; GO:0005737 | inferred from direct assay <newline> membrane ; GO:0016020 | inferred from electronic annotation with InterPro:IPR001577	metalloendopeptidase activity ; GO:0004222 | inferred from sequence or structural similarity with EMBL:M94364 <newline> metalloendopeptidase activity ; GO:0004222 | inferred from direct assay <newline> peptidase activity ; GO:0008233 | inferred from direct assay	Hsap\LMLN
Microbe Sum	3R_5984358_SNP	2.1e-06	FBgn0037794	CG6254	CG6254	508	3PRIME	-	-	nucleus ; GO:0005634 | inferred from electronic annotation with InterPro:IPR012934	zinc ion binding ; GO:0008270 | inferred from electronic annotation with InterPro:IPR007087, InterPro:IPR012934, InterPro:IPR015880 <newline> nucleic acid binding ; GO:0003676 | inferred from electronic annotation with InterPro:IPR013087	-
Microbe Sum	3R_5984358_SNP	2.1e-06	FBgn0086359	Invadolysin	Invadolysin	0	EXON	+	mitotic chromosome condensation ; GO:0007076 | inferred from mutant phenotype <newline> imaginal disc development ; GO:0007444 | inferred from mutant phenotype <newline> brain development ; GO:0007420 | inferred from mutant phenotype <newline> chromatin remodeling ; GO:0006338 | inferred from mutant phenotype <newline> mitotic spindle organization ; GO:0007052 | inferred from mutant phenotype <ne…	cell leading edge ; GO:0031252 | inferred from sequence or structural similarity with UniProtKB:Q96KR4 <newline> cytoplasm ; GO:0005737 | inferred from direct assay <newline> membrane ; GO:0016020 | inferred from electronic annotation with InterPro:IPR001577	metalloendopeptidase activity ; GO:0004222 | inferred from sequence or structural similarity with EMBL:M94364 <newline> metalloendopeptidase activity ; GO:0004222 | inferred from direct assay <newline> peptidase activity ; GO:0008233 | inferred from direct assay	Hsap\LMLN
Microbe Sum	3R_9990129_SNP	5.44e-06	FBgn0011582	Dop1R1	Dopamine 1-like receptor 1	972	3PRIME	-	dopamine receptor signaling pathway ; GO:0007212 | inferred from sequence or structural similarity <newline> adenylate cyclase-activating dopamine receptor signaling pathway ; GO:0007191 | inferred from direct assay <newline> thermosensory behavior ; GO:0040040 | inferred from mutant phenotype <newline> thermotaxis ; GO:0043052 | inferred from mutant phenotype <newline> regulation of olfactory le…	integral component of plasma membrane ; GO:0005887 | non-traceable author statement <newline> integral component of membrane ; GO:0016021 | inferred from sequence or structural similarity <newline> integral component of plasma membrane ; GO:0005887 | inferred from sequence model <newline> integral component of plasma membrane ; GO:0005887 | inferred from electronic annotation with InterPro:IPR000…	dopamine neurotransmitter receptor activity ; GO:0004952 | non-traceable author statement <newline> dopamine neurotransmitter receptor activity, coupled via Gs ; GO:0001588 | non-traceable author statement <newline> dopamine neurotransmitter receptor activity ; GO:0004952 | inferred from sequence or structural similarity <newline> G-protein coupled receptor activity ; GO:0004930 | inferred from s…	-
Microbe Sum	3R_9990129_SNP	5.44e-06	FBgn0038210	CG3199	CG3199	782	3PRIME	+	biological_process ; GO:0008150 | no biological data available	cellular_component ; GO:0005575 | no biological data available	molecular_function ; GO:0003674 | no biological data available	-
Microbe Sum	3R_9990137_SNP	6.03e-06	FBgn0011582	Dop1R1	Dopamine 1-like receptor 1	964	3PRIME	-	dopamine receptor signaling pathway ; GO:0007212 | inferred from sequence or structural similarity <newline> adenylate cyclase-activating dopamine receptor signaling pathway ; GO:0007191 | inferred from direct assay <newline> thermosensory behavior ; GO:0040040 | inferred from mutant phenotype <newline> thermotaxis ; GO:0043052 | inferred from mutant phenotype <newline> regulation of olfactory le…	integral component of plasma membrane ; GO:0005887 | non-traceable author statement <newline> integral component of membrane ; GO:0016021 | inferred from sequence or structural similarity <newline> integral component of plasma membrane ; GO:0005887 | inferred from sequence model <newline> integral component of plasma membrane ; GO:0005887 | inferred from electronic annotation with InterPro:IPR000…	dopamine neurotransmitter receptor activity ; GO:0004952 | non-traceable author statement <newline> dopamine neurotransmitter receptor activity, coupled via Gs ; GO:0001588 | non-traceable author statement <newline> dopamine neurotransmitter receptor activity ; GO:0004952 | inferred from sequence or structural similarity <newline> G-protein coupled receptor activity ; GO:0004930 | inferred from s…	-
Microbe Sum	3R_9990137_SNP	6.03e-06	FBgn0038210	CG3199	CG3199	790	3PRIME	+	biological_process ; GO:0008150 | no biological data available	cellular_component ; GO:0005575 | no biological data available	molecular_function ; GO:0003674 | no biological data available	-
Microbe Sum	3R_10019744_SNP	3.39e-06	FBgn0011582	Dop1R1	Dopamine 1-like receptor 1	0	INTRON	-	dopamine receptor signaling pathway ; GO:0007212 | inferred from sequence or structural similarity <newline> adenylate cyclase-activating dopamine receptor signaling pathway ; GO:0007191 | inferred from direct assay <newline> thermosensory behavior ; GO:0040040 | inferred from mutant phenotype <newline> thermotaxis ; GO:0043052 | inferred from mutant phenotype <newline> regulation of olfactory le…	integral component of plasma membrane ; GO:0005887 | non-traceable author statement <newline> integral component of membrane ; GO:0016021 | inferred from sequence or structural similarity <newline> integral component of plasma membrane ; GO:0005887 | inferred from sequence model <newline> integral component of plasma membrane ; GO:0005887 | inferred from electronic annotation with InterPro:IPR000…	dopamine neurotransmitter receptor activity ; GO:0004952 | non-traceable author statement <newline> dopamine neurotransmitter receptor activity, coupled via Gs ; GO:0001588 | non-traceable author statement <newline> dopamine neurotransmitter receptor activity ; GO:0004952 | inferred from sequence or structural similarity <newline> G-protein coupled receptor activity ; GO:0004930 | inferred from s…	-
Microbe Sum	3R_10019744_SNP	3.39e-06	Intergenic
Microbe Sum	3R_10831413_SNP	2.41e-07	FBgn0267159	CR45599	CR45599	749	5PRIME	-	-	-	-	-
Microbe Sum	3R_12504794_SNP	4.74e-06	FBgn0003944	Ubx	Ultrabithorax	0	INTRON	-	specification of segmental identity, thorax ; GO:0007384 | inferred from mutant phenotype <newline> regulation of transcription, DNA-templated ; GO:0006355 | inferred from direct assay <newline> haltere development ; GO:0007482 | inferred from mutant phenotype <newline> specification of organ identity ; GO:0010092 | inferred from mutant phenotype <newline> heart development ; GO:0007507 | inferre…	nucleus ; GO:0005634 | inferred from direct assay <newline> nucleus ; GO:0005634 | inferred from sequence or structural similarity with UniProtKB:P09629 <newline> nucleus ; GO:0005634 | non-traceable author statement	protein binding ; GO:0005515 | inferred from physical interaction with DIP1 <newline> sequence-specific DNA binding transcription factor activity ; GO:0003700 | inferred from sequence or structural similarity with UniProtKB:P09629 <newline> DNA binding ; GO:0003677 | inferred from direct assay <newline> sequence-specific DNA binding transcription factor activity ; GO:0003700 | traceable author st…	-
Microbe Sum	3R_15046197_SNP	5.54e-08	FBgn0262468	vib	vibrator	0	INTRON	-	meiosis I cytokinesis ; GO:0007110 | inferred from mutant phenotype <newline> meiosis II cytokinesis ; GO:0007111 | inferred from mutant phenotype <newline> actomyosin contractile ring contraction ; GO:0000916 | inferred from mutant phenotype <newline> meiotic spindle stabilization ; GO:0043147 | inferred from mutant phenotype <newline> embryonic development via the syncytial blastoderm ; GO:0001…	Golgi apparatus ; GO:0005794 | inferred from direct assay <newline> spindle envelope ; GO:0070732 | inferred from direct assay <newline> cleavage furrow ; GO:0032154 | inferred from direct assay <newline> Nebenkern ; GO:0016006 | inferred from direct assay <newline> nuclear membrane ; GO:0031965 | inferred from direct assay <newline> plasma membrane ; GO:0005886 | inferred from direct assay	phospholipid transporter activity ; GO:0005548 | inferred from sequence or structural similarity <newline> phospholipid transporter activity ; GO:0005548 | non-traceable author statement <newline> phosphatidylinositol binding ; GO:0035091 | inferred from sequence or structural similarity with UniProtKB:P53811	Hsap\PITPNB <newline> Hsap\PITPNA
Microbe Sum	3R_17040140_SNP	1.62e-06	FBgn0038868	CG5862	CG5862	661	5PRIME	+	-	-	-	Hsap\ENSG00000198171
Microbe Sum	3R_17040140_SNP	1.62e-06	FBgn0264357	SNF4Agamma	SNF4/AMP-activated protein kinase gamma subunit	149	3PRIME	+	lipid metabolic process ; GO:0006629 | inferred from mutant phenotype <newline> sequestering of triglyceride ; GO:0030730 | inferred from mutant phenotype <newline> behavioral response to starvation ; GO:0042595 | inferred from mutant phenotype <newline> cellular response to starvation ; GO:0009267 | inferred from mutant phenotype <newline> protein phosphorylation ; GO:0006468 | inferred from seq…	cytoplasm ; GO:0005737 | inferred from direct assay <newline> nucleus ; GO:0005634 | inferred from direct assay	protein serine/threonine kinase activity ; GO:0004674 | non-traceable author statement <newline> AMP-activated protein kinase activity ; GO:0004679 | inferred from sequence or structural similarity <newline> AMP-activated protein kinase activity ; GO:0004679 | non-traceable author statement <newline> adenyl nucleotide binding ; GO:0030554 | inferred from electronic annotation with InterPro:IPR000…	Hsap\PRKAG2 <newline> Hsap\PRKAG3
Microbe Sum	3R_17040494_SNP	4.69e-06	FBgn0038868	CG5862	CG5862	307	5PRIME	+	-	-	-	Hsap\ENSG00000198171
Microbe Sum	3R_17040494_SNP	4.69e-06	FBgn0264357	SNF4Agamma	SNF4/AMP-activated protein kinase gamma subunit	503	3PRIME	+	lipid metabolic process ; GO:0006629 | inferred from mutant phenotype <newline> sequestering of triglyceride ; GO:0030730 | inferred from mutant phenotype <newline> behavioral response to starvation ; GO:0042595 | inferred from mutant phenotype <newline> cellular response to starvation ; GO:0009267 | inferred from mutant phenotype <newline> protein phosphorylation ; GO:0006468 | inferred from seq…	cytoplasm ; GO:0005737 | inferred from direct assay <newline> nucleus ; GO:0005634 | inferred from direct assay	protein serine/threonine kinase activity ; GO:0004674 | non-traceable author statement <newline> AMP-activated protein kinase activity ; GO:0004679 | inferred from sequence or structural similarity <newline> AMP-activated protein kinase activity ; GO:0004679 | non-traceable author statement <newline> adenyl nucleotide binding ; GO:0030554 | inferred from electronic annotation with InterPro:IPR000…	Hsap\PRKAG2 <newline> Hsap\PRKAG3
Microbe Sum	3R_17040663_SNP	9.1e-06	FBgn0038868	CG5862	CG5862	138	5PRIME	+	-	-	-	Hsap\ENSG00000198171
Microbe Sum	3R_17040663_SNP	9.1e-06	FBgn0264357	SNF4Agamma	SNF4/AMP-activated protein kinase gamma subunit	672	3PRIME	+	lipid metabolic process ; GO:0006629 | inferred from mutant phenotype <newline> sequestering of triglyceride ; GO:0030730 | inferred from mutant phenotype <newline> behavioral response to starvation ; GO:0042595 | inferred from mutant phenotype <newline> cellular response to starvation ; GO:0009267 | inferred from mutant phenotype <newline> protein phosphorylation ; GO:0006468 | inferred from seq…	cytoplasm ; GO:0005737 | inferred from direct assay <newline> nucleus ; GO:0005634 | inferred from direct assay	protein serine/threonine kinase activity ; GO:0004674 | non-traceable author statement <newline> AMP-activated protein kinase activity ; GO:0004679 | inferred from sequence or structural similarity <newline> AMP-activated protein kinase activity ; GO:0004679 | non-traceable author statement <newline> adenyl nucleotide binding ; GO:0030554 | inferred from electronic annotation with InterPro:IPR000…	Hsap\PRKAG2 <newline> Hsap\PRKAG3
Microbe Sum	3R_19254902_SNP	1.67e-06	FBgn0039078	CG4374	CG4374	0	INTRON	-	-	-	nucleic acid binding ; GO:0003676 | inferred from electronic annotation with InterPro:IPR013087 <newline> metal ion binding ; GO:0046872 | inferred from electronic annotation with InterPro:IPR007087	-
Microbe Sum	3R_19254902_SNP	1.67e-06	Intergenic
Microbe Sum	3R_19254941_SNP	3.55e-08	FBgn0039078	CG4374	CG4374	0	INTRON	-	-	-	nucleic acid binding ; GO:0003676 | inferred from electronic annotation with InterPro:IPR013087 <newline> metal ion binding ; GO:0046872 | inferred from electronic annotation with InterPro:IPR007087	-
Microbe Sum	3R_19254941_SNP	3.55e-08	Intergenic
Microbe Sum	3R_19254944_SNP	1.37e-08	FBgn0039078	CG4374	CG4374	0	INTRON	-	-	-	nucleic acid binding ; GO:0003676 | inferred from electronic annotation with InterPro:IPR013087 <newline> metal ion binding ; GO:0046872 | inferred from electronic annotation with InterPro:IPR007087	-
Microbe Sum	3R_19254944_SNP	1.37e-08	Intergenic
Microbe Sum	3R_19254953_SNP	1.24e-08	FBgn0039078	CG4374	CG4374	0	INTRON	-	-	-	nucleic acid binding ; GO:0003676 | inferred from electronic annotation with InterPro:IPR013087 <newline> metal ion binding ; GO:0046872 | inferred from electronic annotation with InterPro:IPR007087	-
Microbe Sum	3R_19254953_SNP	1.24e-08	Intergenic
Microbe Sum	3R_19254980_SNP	4.14e-08	FBgn0039078	CG4374	CG4374	0	INTRON	-	-	-	nucleic acid binding ; GO:0003676 | inferred from electronic annotation with InterPro:IPR013087 <newline> metal ion binding ; GO:0046872 | inferred from electronic annotation with InterPro:IPR007087	-
Microbe Sum	3R_19254981_SNP	4.1e-08	FBgn0039078	CG4374	CG4374	0	INTRON	-	-	-	nucleic acid binding ; GO:0003676 | inferred from electronic annotation with InterPro:IPR013087 <newline> metal ion binding ; GO:0046872 | inferred from electronic annotation with InterPro:IPR007087	-
Microbe Sum	3R_19255679_SNP	8.37e-07	FBgn0039078	CG4374	CG4374	0	INTRON	-	-	-	nucleic acid binding ; GO:0003676 | inferred from electronic annotation with InterPro:IPR013087 <newline> metal ion binding ; GO:0046872 | inferred from electronic annotation with InterPro:IPR007087	-
Microbe Sum	3R_19257989_SNP	6.67e-06	FBgn0039078	CG4374	CG4374	0	INTRON	-	-	-	nucleic acid binding ; GO:0003676 | inferred from electronic annotation with InterPro:IPR013087 <newline> metal ion binding ; GO:0046872 | inferred from electronic annotation with InterPro:IPR007087	-
Microbe Sum	3R_19258008_SNP	7.44e-06	FBgn0039078	CG4374	CG4374	0	INTRON	-	-	-	nucleic acid binding ; GO:0003676 | inferred from electronic annotation with InterPro:IPR013087 <newline> metal ion binding ; GO:0046872 | inferred from electronic annotation with InterPro:IPR007087	-
Microbe Sum	3R_19258541_SNP	1.96e-06	FBgn0039078	CG4374	CG4374	0	INTRON	-	-	-	nucleic acid binding ; GO:0003676 | inferred from electronic annotation with InterPro:IPR013087 <newline> metal ion binding ; GO:0046872 | inferred from electronic annotation with InterPro:IPR007087	-
Microbe Sum	3R_19259006_SNP	6.38e-07	FBgn0039078	CG4374	CG4374	0	INTRON	-	-	-	nucleic acid binding ; GO:0003676 | inferred from electronic annotation with InterPro:IPR013087 <newline> metal ion binding ; GO:0046872 | inferred from electronic annotation with InterPro:IPR007087	-
Microbe Sum	3R_19805522_SNP	9.51e-07	FBgn0051140	CG31140	CG31140	0	INTRON	+	phosphorylation ; GO:0016310 | non-traceable author statement <newline> lateral inhibition ; GO:0046331 | inferred from mutant phenotype <newline> protein kinase C-activating G-protein coupled receptor signaling pathway ; GO:0007205 | inferred from electronic annotation with InterPro:IPR000756, InterPro:IPR001206 <newline> intracellular signal transduction ; GO:0035556 | inferred from electronic …	-	diacylglycerol kinase activity ; GO:0004143 | non-traceable author statement <newline> diacylglycerol binding ; GO:0019992 | inferred from sequence or structural similarity with InterPro:IPR002219 <newline> diacylglycerol kinase activity ; GO:0004143 | inferred from sequence or structural similarity with EMBL:AF085219 <newline> NAD+ kinase activity ; GO:0003951 | inferred from electronic annotati…	Hsap\DGKQ <newline> Hsap\DGKE
Microbe Sum	3R_21980002_SNP	4.87e-07	Intergenic
Microbe Sum	3R_21980002_SNP	4.87e-07	Intergenic
Microbe Sum	3R_24935188_SNP	4.15e-06	FBgn0039633	CG11873	CG11873	518	3PRIME	+	-	-	-	-
Microbe Sum	3R_24935188_SNP	4.15e-06	FBgn0039634	alpha-Man-Ib	alpha Mannosidase Ib	0	EXON	-	encapsulation of foreign target ; GO:0035010 | inferred from mutant phenotype	membrane ; GO:0016020 | inferred from electronic annotation with InterPro:IPR001382	mannosyl-oligosaccharide 1,2-alpha-mannosidase activity ; GO:0004571 | inferred from sequence or structural similarity with UniProtKB:Q9UKM7 <newline> calcium ion binding ; GO:0005509 | inferred from electronic annotation with InterPro:IPR001382	Hsap\MAN1B1
Microbe Sum	3L_2669107_DEL	2.38e-06	FBgn0264606	Fife	Fife	0	INTRON	-	positive regulation of synaptic vesicle clustering ; GO:2000809 | inferred from mutant phenotype <newline> positive regulation of neurotransmitter secretion ; GO:0001956 | inferred from mutant phenotype	presynaptic active zone ; GO:0048786 | inferred from direct assay	molecular_function ; GO:0003674 | no biological data available	-
Microbe Sum	3L_2669107_DEL	2.38e-06	Intergenic
Microbe Sum	3L_2670245_INS	1.6e-06	FBgn0264606	Fife	Fife	0	INTRON	-	positive regulation of synaptic vesicle clustering ; GO:2000809 | inferred from mutant phenotype <newline> positive regulation of neurotransmitter secretion ; GO:0001956 | inferred from mutant phenotype	presynaptic active zone ; GO:0048786 | inferred from direct assay	molecular_function ; GO:0003674 | no biological data available	-
Microbe Sum	3L_2670245_INS	1.6e-06	Intergenic
Microbe Sum	3L_5162467_SNP	4.77e-06	FBgn0052423	shep	alan shepard	0	INTRON	-	gravitaxis ; GO:0042332 | inferred from mutant phenotype <newline> response to gravity ; GO:0009629 | inferred from mutant phenotype	cellular_component ; GO:0005575 | no biological data available	mRNA binding ; GO:0003729 | inferred from sequence or structural similarity <newline> RNA binding ; GO:0003723 | inferred from electronic annotation with InterPro:IPR002343 <newline> nucleotide binding ; GO:0000166 | inferred from electronic annotation with InterPro:IPR012677	Hsap\RBMS1 <newline> Hsap\RBMS2 <newline> Hsap\RBMS3
Microbe Sum	3L_5162467_SNP	4.77e-06	XLOC_016240			0	EXON	-
Microbe Sum	3L_5971333_DEL	3e-08	Intergenic
Microbe Sum	3L_6888952_SNP	5.79e-06	Intergenic
Microbe Sum	3L_6888952_SNP	5.79e-06	Intergenic
Microbe Sum	3L_6890373_SNP	5.9e-06	Intergenic
Microbe Sum	3L_6890373_SNP	5.9e-06	Intergenic
Microbe Sum	3L_6890373_SNP	5.9e-06	Intergenic
Microbe Sum	3L_6890493_SNP	8.7e-06	Intergenic
Microbe Sum	3L_6890493_SNP	8.7e-06	Intergenic
Microbe Sum	3L_6890493_SNP	8.7e-06	Intergenic
Microbe Sum	3L_7592859_DEL	1.65e-06	FBgn0035802	CG33275	CG33275	0	INTRON	+	imaginal disc-derived leg morphogenesis ; GO:0007480 | inferred from mutant phenotype <newline> positive regulation of Rho protein signal transduction ; GO:0035025 | inferred from sequence or structural similarity with RhoGEF4	cellular_component ; GO:0005575 | no biological data available	guanyl-nucleotide exchange factor activity ; GO:0005085 | inferred from sequence or structural similarity with EMBL:AF048834 AND inferred from sequence or structural similarity with EMBL:AF091395 <newline> Rho guanyl-nucleotide exchange factor activity ; GO:0005089 | inferred from sequence or structural similarity with RhoGEF4	-
Microbe Sum	3L_7592859_DEL	1.65e-06	Intergenic
Microbe Sum	3L_7592868_SNP	2.2e-06	FBgn0035802	CG33275	CG33275	0	INTRON	+	imaginal disc-derived leg morphogenesis ; GO:0007480 | inferred from mutant phenotype <newline> positive regulation of Rho protein signal transduction ; GO:0035025 | inferred from sequence or structural similarity with RhoGEF4	cellular_component ; GO:0005575 | no biological data available	guanyl-nucleotide exchange factor activity ; GO:0005085 | inferred from sequence or structural similarity with EMBL:AF048834 AND inferred from sequence or structural similarity with EMBL:AF091395 <newline> Rho guanyl-nucleotide exchange factor activity ; GO:0005089 | inferred from sequence or structural similarity with RhoGEF4	-
Microbe Sum	3L_7592868_SNP	2.2e-06	Intergenic
Microbe Sum	3L_10440379_SNP	2.7e-06	Intergenic
Microbe Sum	3L_12157189_SNP	3.04e-06	FBgn0036259	CG9760	CG9760	354	5PRIME	-	-	-	-	-
Microbe Sum	3L_12157189_SNP	3.04e-06	FBgn0036260	Rh7	Rhodopsin 7	116	3PRIME	-	G-protein coupled receptor signaling pathway ; GO:0007186 | inferred from sequence or structural similarity with Rh3 <newline> visual perception ; GO:0007601 | inferred from electronic annotation with InterPro:IPR001760	integral component of membrane ; GO:0016021 | inferred from sequence or structural similarity with Rh3	G-protein coupled photoreceptor activity ; GO:0008020 | inferred from sequence or structural similarity with Rh3	Hsap\COMMD2
Microbe Sum	3L_12157189_SNP	3.04e-06	Intergenic
Microbe Sum	3L_12162980_SNP	6.9e-06	FBgn0036260	Rh7	Rhodopsin 7	0	INTRON	-	G-protein coupled receptor signaling pathway ; GO:0007186 | inferred from sequence or structural similarity with Rh3 <newline> visual perception ; GO:0007601 | inferred from electronic annotation with InterPro:IPR001760	integral component of membrane ; GO:0016021 | inferred from sequence or structural similarity with Rh3	G-protein coupled photoreceptor activity ; GO:0008020 | inferred from sequence or structural similarity with Rh3	Hsap\COMMD2
Microbe Sum	3L_12396206_SNP	3.89e-06	FBgn0052103	CG32103	CG32103	0	EXON	-	transport ; GO:0006810 | inferred from sequence or structural similarity with UniProtKB:O18757 <newline> transmembrane transport ; GO:0055085 | inferred from electronic annotation with InterPro:IPR002067	peroxisomal membrane ; GO:0005778 | inferred from sequence or structural similarity with EMBL:AF004161 <newline> mitochondrial envelope ; GO:0005740 | inferred from sequence or structural similarity <newline> mitochondrial inner membrane ; GO:0005743 | inferred from electronic annotation with InterPro:IPR002067, InterPro:IPR002167	transmembrane transporter activity ; GO:0022857 | inferred from sequence or structural similarity with EMBL:AF004161 <newline> transmembrane transporter activity ; GO:0022857 | inferred from sequence or structural similarity <newline> calcium ion binding ; GO:0005509 | inferred from electronic annotation with InterPro:IPR002048, InterPro:IPR011992	Hsap\SLC25A24 <newline> Hsap\SLC25A41 <newline> Hsap\ENSG00000148339
Microbe Sum	3L_12668004_SNP	8.62e-06	Intergenic
Microbe Sum	3L_12668004_SNP	8.62e-06	Intergenic
Microbe Sum	3L_12668004_SNP	8.62e-06	Intergenic
Microbe Sum	3L_12936658_SNP	9.11e-06	Intergenic
Microbe Sum	3L_12936658_SNP	9.11e-06	Intergenic
Microbe Sum	3L_12936661_SNP	3.12e-06	Intergenic
Microbe Sum	3L_12936661_SNP	3.12e-06	Intergenic
Microbe Sum	3L_21120074_SNP	6.49e-06	FBgn0020294	ko	knockout	0	INTRON	-	motor neuron axon guidance ; GO:0008045 | inferred from mutant phenotype	cellular_component ; GO:0005575 | no biological data available	molecular_function ; GO:0003674 | no biological data available	-
Microbe Sum	3L_21120074_SNP	6.49e-06	XLOC_018558			984	5PRIME	-
Microbe Sum	3L_21120074_SNP	6.49e-06	XLOC_018559			451	3PRIME	-
Microbe Sum	3L_22173458_SNP	6.29e-06	FBgn0037153	olf413	olf413	0	INTRON	+	oxidation-reduction process ; GO:0055114 | inferred from electronic annotation with InterPro:IPR000323, InterPro:IPR000945, InterPro:IPR014783, InterPro:IPR014784	extracellular space ; GO:0005615 | inferred from sequence or structural similarity with to	dopamine beta-monooxygenase activity ; GO:0004500 | inferred from sequence or structural similarity with UniProtKB:P15101 <newline> copper ion binding ; GO:0005507 | inferred from electronic annotation with InterPro:IPR000323	-
Microbe Sum	3L_22186521_SNP	5.93e-06	FBgn0037153	olf413	olf413	0	INTRON	+	oxidation-reduction process ; GO:0055114 | inferred from electronic annotation with InterPro:IPR000323, InterPro:IPR000945, InterPro:IPR014783, InterPro:IPR014784	extracellular space ; GO:0005615 | inferred from sequence or structural similarity with to	dopamine beta-monooxygenase activity ; GO:0004500 | inferred from sequence or structural similarity with UniProtKB:P15101 <newline> copper ion binding ; GO:0005507 | inferred from electronic annotation with InterPro:IPR000323	-
Microbe Sum	3L_22194081_SNP	6.74e-06	FBgn0037153	olf413	olf413	0	INTRON	+	oxidation-reduction process ; GO:0055114 | inferred from electronic annotation with InterPro:IPR000323, InterPro:IPR000945, InterPro:IPR014783, InterPro:IPR014784	extracellular space ; GO:0005615 | inferred from sequence or structural similarity with to	dopamine beta-monooxygenase activity ; GO:0004500 | inferred from sequence or structural similarity with UniProtKB:P15101 <newline> copper ion binding ; GO:0005507 | inferred from electronic annotation with InterPro:IPR000323	-
Microbe Sum	3L_22216150_SNP	7.26e-06	FBgn0037153	olf413	olf413	0	INTRON	+	oxidation-reduction process ; GO:0055114 | inferred from electronic annotation with InterPro:IPR000323, InterPro:IPR000945, InterPro:IPR014783, InterPro:IPR014784	extracellular space ; GO:0005615 | inferred from sequence or structural similarity with to	dopamine beta-monooxygenase activity ; GO:0004500 | inferred from sequence or structural similarity with UniProtKB:P15101 <newline> copper ion binding ; GO:0005507 | inferred from electronic annotation with InterPro:IPR000323	-
Microbe Sum	3L_22301616_SNP	6.28e-06	FBgn0004449	Ten-m	Tenascin major	0	INTRON	-	cell adhesion ; GO:0007155 | inferred from mutant phenotype <newline> regulation of cell shape ; GO:0008360 | inferred from mutant phenotype <newline> cell adhesion ; GO:0007155 | inferred from sequence or structural similarity with EMBL:AB025410 <newline> compound eye photoreceptor development ; GO:0042051 | inferred from mutant phenotype <newline> R7 cell development ; GO:0045467 | inferred fro…	proteinaceous extracellular matrix ; GO:0005578 | inferred from sequence or structural similarity <newline> integral component of plasma membrane ; GO:0005887 | inferred from direct assay <newline> proteinaceous extracellular matrix ; GO:0005578 | inferred from sequence or structural similarity with EMBL:AB025410 <newline> neuromuscular junction ; GO:0031594 | inferred from direct assay <newline>…	filamin binding ; GO:0031005 | inferred from direct assay <newline> identical protein binding ; GO:0042802 | inferred from direct assay	-
Microbe Sum	3L_22335684_SNP	6.93e-06	FBgn0004449	Ten-m	Tenascin major	0	INTRON	-	cell adhesion ; GO:0007155 | inferred from mutant phenotype <newline> regulation of cell shape ; GO:0008360 | inferred from mutant phenotype <newline> cell adhesion ; GO:0007155 | inferred from sequence or structural similarity with EMBL:AB025410 <newline> compound eye photoreceptor development ; GO:0042051 | inferred from mutant phenotype <newline> R7 cell development ; GO:0045467 | inferred fro…	proteinaceous extracellular matrix ; GO:0005578 | inferred from sequence or structural similarity <newline> integral component of plasma membrane ; GO:0005887 | inferred from direct assay <newline> proteinaceous extracellular matrix ; GO:0005578 | inferred from sequence or structural similarity with EMBL:AB025410 <newline> neuromuscular junction ; GO:0031594 | inferred from direct assay <newline>…	filamin binding ; GO:0031005 | inferred from direct assay <newline> identical protein binding ; GO:0042802 | inferred from direct assay	-
Microbe Sum	3L_22352508_SNP	6.38e-06	FBgn0004449	Ten-m	Tenascin major	0	INTRON	-	cell adhesion ; GO:0007155 | inferred from mutant phenotype <newline> regulation of cell shape ; GO:0008360 | inferred from mutant phenotype <newline> cell adhesion ; GO:0007155 | inferred from sequence or structural similarity with EMBL:AB025410 <newline> compound eye photoreceptor development ; GO:0042051 | inferred from mutant phenotype <newline> R7 cell development ; GO:0045467 | inferred fro…	proteinaceous extracellular matrix ; GO:0005578 | inferred from sequence or structural similarity <newline> integral component of plasma membrane ; GO:0005887 | inferred from direct assay <newline> proteinaceous extracellular matrix ; GO:0005578 | inferred from sequence or structural similarity with EMBL:AB025410 <newline> neuromuscular junction ; GO:0031594 | inferred from direct assay <newline>…	filamin binding ; GO:0031005 | inferred from direct assay <newline> identical protein binding ; GO:0042802 | inferred from direct assay	-
Microbe Sum	3L_22352508_SNP	6.38e-06	FBgn0267627			50	3PRIME	-
Microbe Sum	3L_22364278_SNP	7.65e-06	FBgn0004449	Ten-m	Tenascin major	0	INTRON	-	cell adhesion ; GO:0007155 | inferred from mutant phenotype <newline> regulation of cell shape ; GO:0008360 | inferred from mutant phenotype <newline> cell adhesion ; GO:0007155 | inferred from sequence or structural similarity with EMBL:AB025410 <newline> compound eye photoreceptor development ; GO:0042051 | inferred from mutant phenotype <newline> R7 cell development ; GO:0045467 | inferred fro…	proteinaceous extracellular matrix ; GO:0005578 | inferred from sequence or structural similarity <newline> integral component of plasma membrane ; GO:0005887 | inferred from direct assay <newline> proteinaceous extracellular matrix ; GO:0005578 | inferred from sequence or structural similarity with EMBL:AB025410 <newline> neuromuscular junction ; GO:0031594 | inferred from direct assay <newline>…	filamin binding ; GO:0031005 | inferred from direct assay <newline> identical protein binding ; GO:0042802 | inferred from direct assay	-
Microbe Sum	3L_22413282_DEL	2.86e-06	FBgn0266772	CR45237	CR45237	673	3PRIME	-	-	-	-	-
Microbe Sum	3L_22419832_SNP	1.01e-06	Intergenic
Microbe Sum	3L_22422086_DEL	2.05e-07	Intergenic
Microbe Sum	3L_22428929_SNP	2.05e-06	Intergenic
Microbe Sum	3L_22430444_SNP	3.6e-12	Intergenic
Microbe Sum	3L_22435648_SNP	1.64e-06	Intergenic
Microbe Sum	3L_22439138_SNP	4e-06	Intergenic
Microbe Sum	3L_22452325_SNP	2.58e-07	FBgn0037163	laza	lazaro	0	EXON	-	dephosphorylation ; GO:0016311 | non-traceable author statement <newline> phototransduction ; GO:0007602 | inferred from mutant phenotype <newline> response to light intensity ; GO:0009642 | inferred from mutant phenotype <newline> thermotaxis ; GO:0043052 | inferred from direct assay <newline> phototransduction ; GO:0007602 | inferred from mutant phenotype inferred from genetic interaction with …	membrane ; GO:0016020 | inferred from electronic annotation with InterPro:IPR000326	phosphatidate phosphatase activity ; GO:0008195 | non-traceable author statement <newline> phosphatidate phosphatase activity ; GO:0008195 | inferred from sequence or structural similarity with MGD:Ppap2a; MGI:MGI:108412	Hsap\PPAP2C <newline> Hsap\PPAP2B <newline> Hsap\PPAP2A
Microbe Sum	3L_22475520_SNP	9.95e-06	Intergenic
Microbe Sum	3L_22475779_SNP	9.87e-08	Intergenic
Microbe Sum	3L_22479180_SNP	4.45e-06	Intergenic
Microbe Sum	3L_22479330_SNP	6.19e-06	Intergenic
Microbe Sum	3L_22482281_SNP	2.93e-06	Intergenic
Microbe Sum	3L_22482281_SNP	2.93e-06	Intergenic
Microbe Sum	3L_22497634_SNP	3.27e-06	FBgn0263034	CG43329	CG43329	0	EXON	-	biological_process ; GO:0008150 | no biological data available	cellular_component ; GO:0005575 | no biological data available	molecular_function ; GO:0003674 | no biological data available	-
Microbe Sum	3L_22497634_SNP	3.27e-06	FBgn0263035	CG43330	CG43330	111	5PRIME	-	biological_process ; GO:0008150 | no biological data available	cellular_component ; GO:0005575 | no biological data available	molecular_function ; GO:0003674 | no biological data available	-
Microbe Sum	3L_22497634_SNP	3.27e-06	FBgn0263036	CG43331	CG43331	704	5PRIME	-	biological_process ; GO:0008150 | no biological data available	cellular_component ; GO:0005575 | no biological data available	molecular_function ; GO:0003674 | no biological data available	-
Microbe Sum	3L_22497640_SNP	6.15e-06	FBgn0263034	CG43329	CG43329	0	EXON	-	biological_process ; GO:0008150 | no biological data available	cellular_component ; GO:0005575 | no biological data available	molecular_function ; GO:0003674 | no biological data available	-
Microbe Sum	3L_22497640_SNP	6.15e-06	FBgn0263035	CG43330	CG43330	117	5PRIME	-	biological_process ; GO:0008150 | no biological data available	cellular_component ; GO:0005575 | no biological data available	molecular_function ; GO:0003674 | no biological data available	-
Microbe Sum	3L_22497640_SNP	6.15e-06	FBgn0263036	CG43331	CG43331	710	5PRIME	-	biological_process ; GO:0008150 | no biological data available	cellular_component ; GO:0005575 | no biological data available	molecular_function ; GO:0003674 | no biological data available	-
Microbe Sum	3L_22533598_SNP	9.6e-06	Intergenic
Microbe Sum	3L_22533598_SNP	9.6e-06	Intergenic
Microbe Sum	3L_22536901_SNP	3.12e-06	Intergenic
Microbe Sum	3L_22536901_SNP	3.12e-06	XLOC_018720			0	EXON	-
Microbe Sum	3L_22788360_INS	6.77e-06	FBgn0027339	jim	jim	0	EXON	-	regulation of chromatin silencing ; GO:0031935 | inferred from mutant phenotype <newline> dendrite morphogenesis ; GO:0048813 | inferred from mutant phenotype	nucleus ; GO:0005634 | inferred from sequence or structural similarity with EMBL:AB007407; protein_id:BAA25190	sequence-specific DNA binding transcription factor activity ; GO:0003700 | inferred from sequence or structural similarity with EMBL:AB007407; protein_id:BAA25190 <newline> nucleic acid binding ; GO:0003676 | inferred from electronic annotation with InterPro:IPR013087 <newline> metal ion binding ; GO:0046872 | inferred from electronic annotation with InterPro:IPR007087	-
Microbe Sum	3L_23034357_SNP	3.25e-06	FBgn0262509	nrm	neuromusculin	957	3PRIME	+	cell adhesion ; GO:0007155 | non-traceable author statement <newline> synaptic target recognition ; GO:0008039 | inferred from mutant phenotype	plasma membrane ; GO:0005886 | inferred from direct assay AND inferred from sequence or structural similarity	molecular_function ; GO:0003674 | no biological data available	-
Microbe Sum	3L_23034357_SNP	3.25e-06	Intergenic
Microbe Sum	3L_23048121_SNP	4.68e-06	Intergenic
Microbe Sum	3L_23048121_SNP	4.68e-06	Intergenic
Microbe Sum	3L_23048121_SNP	4.68e-06	Intergenic
Microbe Sum	3L_23048121_SNP	4.68e-06	Intergenic
Microbe Sum	3L_23048121_SNP	4.68e-06	Intergenic
Microbe Sum	3L_23060403_SNP	4.81e-06	Intergenic
Microbe Sum	3L_23060403_SNP	4.81e-06	Intergenic
Microbe Sum	3L_23088086_SNP	3.94e-06	FBgn0024733	RpL10	Ribosomal protein L10	0	EXON	-	translation ; GO:0006412 | inferred from sequence or structural similarity with NCBI_gi:5174431 <newline> mitotic spindle elongation ; GO:0000022 | inferred from mutant phenotype <newline> mitotic spindle organization ; GO:0007052 | inferred from mutant phenotype <newline> centrosome duplication ; GO:0051298 | inferred from mutant phenotype <newline> centrosome organization ; GO:0051297 | inferre…	cytosolic large ribosomal subunit ; GO:0022625 | inferred from sequence or structural similarity with NCBI_gi:5174431 <newline> ribosome ; GO:0005840 | non-traceable author statement <newline> neuronal cell body ; GO:0043025 | inferred from direct assay <newline> cytoplasm ; GO:0005737 | inferred from direct assay <newline> ribosome ; GO:0005840 | inferred from direct assay	structural constituent of ribosome ; GO:0003735 | inferred from sequence or structural similarity with NCBI_gi:5174431 <newline> structural constituent of ribosome ; GO:0003735 | non-traceable author statement <newline> structural constituent of ribosome ; GO:0003735 | inferred from direct assay	Hsap\RPL10L <newline> Hsap\RPL10
Microbe Sum	3L_23088086_SNP	3.94e-06	Intergenic
Microbe Sum	3L_23089110_SNP	2.44e-06	FBgn0024733	RpL10	Ribosomal protein L10	539	5PRIME	-	translation ; GO:0006412 | inferred from sequence or structural similarity with NCBI_gi:5174431 <newline> mitotic spindle elongation ; GO:0000022 | inferred from mutant phenotype <newline> mitotic spindle organization ; GO:0007052 | inferred from mutant phenotype <newline> centrosome duplication ; GO:0051298 | inferred from mutant phenotype <newline> centrosome organization ; GO:0051297 | inferre…	cytosolic large ribosomal subunit ; GO:0022625 | inferred from sequence or structural similarity with NCBI_gi:5174431 <newline> ribosome ; GO:0005840 | non-traceable author statement <newline> neuronal cell body ; GO:0043025 | inferred from direct assay <newline> cytoplasm ; GO:0005737 | inferred from direct assay <newline> ribosome ; GO:0005840 | inferred from direct assay	structural constituent of ribosome ; GO:0003735 | inferred from sequence or structural similarity with NCBI_gi:5174431 <newline> structural constituent of ribosome ; GO:0003735 | non-traceable author statement <newline> structural constituent of ribosome ; GO:0003735 | inferred from direct assay	Hsap\RPL10L <newline> Hsap\RPL10
Microbe Sum	3L_23089110_SNP	2.44e-06	Intergenic
Microbe Sum	3L_23093325_SNP	1.09e-06	FBgn0264492	CkIIalpha	casein kinase IIalpha	0	EXON	+	regulation of protein stability ; GO:0031647 | inferred from mutant phenotype <newline> negative regulation of protein ubiquitination ; GO:0031397 | inferred from mutant phenotype <newline> positive regulation of hh target transcription factor activity ; GO:0007228 | inferred from mutant phenotype <newline> positive regulation of smoothened signaling pathway ; GO:0045880 | inferred from mutant ph…	protein kinase CK2 complex ; GO:0005956 | inferred from sequence or structural similarity <newline> cytosol ; GO:0005829 | inferred from direct assay <newline> nucleus ; GO:0005634 | inferred from direct assay <newline> protein kinase CK2 complex ; GO:0005956 | inferred from direct assay <newline> protein kinase CK2 complex ; GO:0005956 | non-traceable author statement <newline> cytoplasm ; GO:00…	ATP binding ; GO:0005524 | inferred from electronic annotation with InterPro:IPR000719, InterPro:IPR002290, InterPro:IPR017441 <newline> protein binding ; GO:0005515 | inferred from physical interaction with CkII_-i1 <newline> protein kinase activity ; GO:0004672 | non-traceable author statement <newline> protein serine/threonine kinase activity ; GO:0004674 | inferred from direct assay <newline>…	Hsap\ENSG00000254598 <newline> Hsap\CSNK2A2 <newline> Hsap\CSNK2A1
Microbe Sum	3L_23093325_SNP	1.09e-06	XLOC_015378			109	3PRIME	+
Microbe Sum	3L_23094984_SNP	4.17e-06	FBgn0264492	CkIIalpha	casein kinase IIalpha	0	INTRON	+	regulation of protein stability ; GO:0031647 | inferred from mutant phenotype <newline> negative regulation of protein ubiquitination ; GO:0031397 | inferred from mutant phenotype <newline> positive regulation of hh target transcription factor activity ; GO:0007228 | inferred from mutant phenotype <newline> positive regulation of smoothened signaling pathway ; GO:0045880 | inferred from mutant ph…	protein kinase CK2 complex ; GO:0005956 | inferred from sequence or structural similarity <newline> cytosol ; GO:0005829 | inferred from direct assay <newline> nucleus ; GO:0005634 | inferred from direct assay <newline> protein kinase CK2 complex ; GO:0005956 | inferred from direct assay <newline> protein kinase CK2 complex ; GO:0005956 | non-traceable author statement <newline> cytoplasm ; GO:00…	ATP binding ; GO:0005524 | inferred from electronic annotation with InterPro:IPR000719, InterPro:IPR002290, InterPro:IPR017441 <newline> protein binding ; GO:0005515 | inferred from physical interaction with CkII_-i1 <newline> protein kinase activity ; GO:0004672 | non-traceable author statement <newline> protein serine/threonine kinase activity ; GO:0004674 | inferred from direct assay <newline>…	Hsap\ENSG00000254598 <newline> Hsap\CSNK2A2 <newline> Hsap\CSNK2A1
Microbe Sum	3L_23097157_SNP	9.47e-07	FBgn0264492	CkIIalpha	casein kinase IIalpha	597	3PRIME	+	regulation of protein stability ; GO:0031647 | inferred from mutant phenotype <newline> negative regulation of protein ubiquitination ; GO:0031397 | inferred from mutant phenotype <newline> positive regulation of hh target transcription factor activity ; GO:0007228 | inferred from mutant phenotype <newline> positive regulation of smoothened signaling pathway ; GO:0045880 | inferred from mutant ph…	protein kinase CK2 complex ; GO:0005956 | inferred from sequence or structural similarity <newline> cytosol ; GO:0005829 | inferred from direct assay <newline> nucleus ; GO:0005634 | inferred from direct assay <newline> protein kinase CK2 complex ; GO:0005956 | inferred from direct assay <newline> protein kinase CK2 complex ; GO:0005956 | non-traceable author statement <newline> cytoplasm ; GO:00…	ATP binding ; GO:0005524 | inferred from electronic annotation with InterPro:IPR000719, InterPro:IPR002290, InterPro:IPR017441 <newline> protein binding ; GO:0005515 | inferred from physical interaction with CkII_-i1 <newline> protein kinase activity ; GO:0004672 | non-traceable author statement <newline> protein serine/threonine kinase activity ; GO:0004674 | inferred from direct assay <newline>…	Hsap\ENSG00000254598 <newline> Hsap\CSNK2A2 <newline> Hsap\CSNK2A1
Microbe Sum	3L_23097445_SNP	4.91e-07	FBgn0264492	CkIIalpha	casein kinase IIalpha	885	3PRIME	+	regulation of protein stability ; GO:0031647 | inferred from mutant phenotype <newline> negative regulation of protein ubiquitination ; GO:0031397 | inferred from mutant phenotype <newline> positive regulation of hh target transcription factor activity ; GO:0007228 | inferred from mutant phenotype <newline> positive regulation of smoothened signaling pathway ; GO:0045880 | inferred from mutant ph…	protein kinase CK2 complex ; GO:0005956 | inferred from sequence or structural similarity <newline> cytosol ; GO:0005829 | inferred from direct assay <newline> nucleus ; GO:0005634 | inferred from direct assay <newline> protein kinase CK2 complex ; GO:0005956 | inferred from direct assay <newline> protein kinase CK2 complex ; GO:0005956 | non-traceable author statement <newline> cytoplasm ; GO:00…	ATP binding ; GO:0005524 | inferred from electronic annotation with InterPro:IPR000719, InterPro:IPR002290, InterPro:IPR017441 <newline> protein binding ; GO:0005515 | inferred from physical interaction with CkII_-i1 <newline> protein kinase activity ; GO:0004672 | non-traceable author statement <newline> protein serine/threonine kinase activity ; GO:0004674 | inferred from direct assay <newline>…	Hsap\ENSG00000254598 <newline> Hsap\CSNK2A2 <newline> Hsap\CSNK2A1
Microbe Sum	3L_23116381_SNP	5.81e-06	Intergenic
Microbe Sum	3L_23116381_SNP	5.81e-06	Intergenic
Microbe Sum	3L_23138526_SNP	3.94e-06	Intergenic
Microbe Sum	3L_23143204_SNP	3.94e-06	FBgn0052350	CG32350	CG32350	0	EXON	-	protein transport ; GO:0015031 | inferred from sequence or structural similarity with UniProtKB:Q9H270 <newline> endosomal transport ; GO:0016197 | inferred from sequence or structural similarity with SGD_LOCUS:PEP5; SGD:S000004844 <newline> regulation of SNARE complex assembly ; GO:0035542 | inferred from sequence or structural similarity with SGD_LOCUS:PEP5; SGD:S000004844	CORVET complex ; GO:0033263 | inferred from sequence or structural similarity with SGD_LOCUS:PEP5; SGD:S000004844 <newline> HOPS complex ; GO:0030897 | inferred from sequence or structural similarity with SGD_LOCUS:PEP5; SGD:S000004844	zinc ion binding ; GO:0008270 | inferred from electronic annotation with InterPro:IPR001841 <newline> molecular_function ; GO:0003674 | no biological data available	-
Microbe Sum	3L_23143204_SNP	3.94e-06	FBgn0266657	CR45164	CR45164	0	EXON	+	-	-	-	-
Microbe Sum	3L_23148609_SNP	2.27e-06	Intergenic
Microbe Sum	3L_23171443_SNP	5.35e-06	FBgn0054031	CG34031	CG34031	0	INTRON	+	regulation of transcription, DNA-templated ; GO:0006355 | inferred from electronic annotation with InterPro:IPR001356, InterPro:IPR017970	nucleus ; GO:0005634 | inferred from electronic annotation with InterPro:IPR017970	sequence-specific DNA binding ; GO:0043565 | inferred from electronic annotation with InterPro:IPR001356, InterPro:IPR017970 <newline> sequence-specific DNA binding transcription factor activity ; GO:0003700 | inferred from electronic annotation with InterPro:IPR001356	-
Microbe Sum	3L_23172173_SNP	3.94e-06	FBgn0054031	CG34031	CG34031	0	INTRON	+	regulation of transcription, DNA-templated ; GO:0006355 | inferred from electronic annotation with InterPro:IPR001356, InterPro:IPR017970	nucleus ; GO:0005634 | inferred from electronic annotation with InterPro:IPR017970	sequence-specific DNA binding ; GO:0043565 | inferred from electronic annotation with InterPro:IPR001356, InterPro:IPR017970 <newline> sequence-specific DNA binding transcription factor activity ; GO:0003700 | inferred from electronic annotation with InterPro:IPR001356	-
Microbe Sum	3L_23176220_SNP	2.62e-06	FBgn0054031	CG34031	CG34031	0	INTRON	+	regulation of transcription, DNA-templated ; GO:0006355 | inferred from electronic annotation with InterPro:IPR001356, InterPro:IPR017970	nucleus ; GO:0005634 | inferred from electronic annotation with InterPro:IPR017970	sequence-specific DNA binding ; GO:0043565 | inferred from electronic annotation with InterPro:IPR001356, InterPro:IPR017970 <newline> sequence-specific DNA binding transcription factor activity ; GO:0003700 | inferred from electronic annotation with InterPro:IPR001356	-
Microbe Sum	3L_23176220_SNP	2.62e-06	FBgn0264698	CR43967	CR43967	479	3PRIME	-	-	-	-	-
Microbe Sum	3L_23955747_SNP	6.05e-06	FBgn0058470	CG40470	CG40470	0	INTRON	-	proteolysis ; GO:0006508 | inferred from electronic annotation with InterPro:IPR001930	-	metallopeptidase activity ; GO:0008237 | inferred from electronic annotation with InterPro:IPR014782 <newline> zinc ion binding ; GO:0008270 | inferred from electronic annotation with InterPro:IPR014782	-
Microbe Sum	3L_23955747_SNP	6.05e-06	Intergenic
Microbe Sum	3L_23955747_SNP	6.05e-06	Intergenic
Microbe Sum	3L_24225839_SNP	3.89e-06	FBgn0011288	Snap25	Synaptosomal-associated protein 25kDa	0	INTRON	+	neurotransmitter secretion ; GO:0007269 | non-traceable author statement <newline> vesicle-mediated transport ; GO:0016192 | non-traceable author statement <newline> Golgi to plasma membrane transport ; GO:0006893 | inferred from sequence or structural similarity <newline> synaptic vesicle docking involved in exocytosis ; GO:0016081 | non-traceable author statement <newline> synaptic transmission…	plasma membrane ; GO:0005886 | non-traceable author statement <newline> synapse ; GO:0045202 | non-traceable author statement <newline> plasma membrane ; GO:0005886 | inferred from direct assay <newline> SNARE complex ; GO:0031201 | inferred from direct assay <newline> terminal bouton ; GO:0043195 | inferred from direct assay	SNAP receptor activity ; GO:0005484 | inferred from sequence or structural similarity <newline> SNAP receptor activity ; GO:0005484 | non-traceable author statement <newline> SNARE binding ; GO:0000149 | inferred from physical interaction with nSyb, Syx1A <newline> SNAP receptor activity ; GO:0005484 | inferred from direct assay <newline> protein binding ; GO:0005515 | inferred from physical inte…	Hsap\SNAP23 <newline> Hsap\SNAP25
Microbe Sum	3L_24225839_SNP	3.89e-06	Intergenic
Microbe Sum	3L_24225839_SNP	3.89e-06	XLOC_015540			794	5PRIME	+
Microbe Sum	3L_24225840_SNP	3.57e-06	FBgn0011288	Snap25	Synaptosomal-associated protein 25kDa	0	INTRON	+	neurotransmitter secretion ; GO:0007269 | non-traceable author statement <newline> vesicle-mediated transport ; GO:0016192 | non-traceable author statement <newline> Golgi to plasma membrane transport ; GO:0006893 | inferred from sequence or structural similarity <newline> synaptic vesicle docking involved in exocytosis ; GO:0016081 | non-traceable author statement <newline> synaptic transmission…	plasma membrane ; GO:0005886 | non-traceable author statement <newline> synapse ; GO:0045202 | non-traceable author statement <newline> plasma membrane ; GO:0005886 | inferred from direct assay <newline> SNARE complex ; GO:0031201 | inferred from direct assay <newline> terminal bouton ; GO:0043195 | inferred from direct assay	SNAP receptor activity ; GO:0005484 | inferred from sequence or structural similarity <newline> SNAP receptor activity ; GO:0005484 | non-traceable author statement <newline> SNARE binding ; GO:0000149 | inferred from physical interaction with nSyb, Syx1A <newline> SNAP receptor activity ; GO:0005484 | inferred from direct assay <newline> protein binding ; GO:0005515 | inferred from physical inte…	Hsap\SNAP23 <newline> Hsap\SNAP25
Microbe Sum	3L_24225840_SNP	3.57e-06	Intergenic
Microbe Sum	3L_24225840_SNP	3.57e-06	XLOC_015540			793	5PRIME	+
Wolbachia	X_12509103_SNP	7.36e-06	FBgn0030407	CG2543	CG2543	0	EXON	+	tetrahydrofolylpolyglutamate biosynthetic process ; GO:0046901 | inferred from sequence or structural similarity with UniProtKB:Q05932	cytoplasm ; GO:0005737 | inferred from sequence or structural similarity with UniProtKB:Q05932 <newline> mitochondrion ; GO:0005739 | inferred from sequence or structural similarity with UniProtKB:Q05932	tetrahydrofolylpolyglutamate synthase activity ; GO:0004326 | inferred from sequence or structural similarity with UniProtKB:P48760 <newline> tetrahydrofolylpolyglutamate synthase activity ; GO:0004326 | inferred from sequence or structural similarity with UniProtKB:Q05932 <newline> ATP binding ; GO:0005524 | inferred from electronic annotation with InterPro:IPR001645, InterPro:IPR004101, InterPr…	Hsap\FPGS
Wolbachia	X_12509103_SNP	7.36e-06	FBgn0267181	CR45621	CR45621	0	INTRON	-	-	-	-	-
Wolbachia	X_12509228_SNP	7.45e-06	FBgn0030407	CG2543	CG2543	0	EXON	+	tetrahydrofolylpolyglutamate biosynthetic process ; GO:0046901 | inferred from sequence or structural similarity with UniProtKB:Q05932	cytoplasm ; GO:0005737 | inferred from sequence or structural similarity with UniProtKB:Q05932 <newline> mitochondrion ; GO:0005739 | inferred from sequence or structural similarity with UniProtKB:Q05932	tetrahydrofolylpolyglutamate synthase activity ; GO:0004326 | inferred from sequence or structural similarity with UniProtKB:P48760 <newline> tetrahydrofolylpolyglutamate synthase activity ; GO:0004326 | inferred from sequence or structural similarity with UniProtKB:Q05932 <newline> ATP binding ; GO:0005524 | inferred from electronic annotation with InterPro:IPR001645, InterPro:IPR004101, InterPr…	Hsap\FPGS
Wolbachia	X_12509228_SNP	7.45e-06	FBgn0267181	CR45621	CR45621	0	INTRON	-	-	-	-	-
Wolbachia	X_19362302_SNP	4.04e-06	FBgn0031016	kek5	kekkon5	0	INTRON	+	regulation of BMP signaling pathway ; GO:0030510 | inferred from direct assay <newline> negative regulation of epidermal growth factor receptor signaling pathway ; GO:0042059 | NOT inferred from mutant phenotype	plasma membrane ; GO:0005886 | inferred from direct assay <newline> integral component of plasma membrane ; GO:0005887 | inferred from sequence model	-	-
Wolbachia	X_19362302_SNP	4.04e-06	Intergenic
Wolbachia	X_19725504_SNP	6.72e-06	FBgn0261811	pico	pico	0	EXON	-	positive regulation of growth ; GO:0045927 | inferred from mutant phenotype <newline> imaginal disc development ; GO:0007444 | inferred from mutant phenotype <newline> positive regulation of cell division ; GO:0051781 | inferred from mutant phenotype <newline> regulation of cell size ; GO:0008361 | inferred from mutant phenotype <newline> actin filament organization ; GO:0007015 | inferred from m…	filopodium tip ; GO:0032433 | colocalizes_with inferred from direct assay	protein phosphatase 1 binding ; GO:0008157 | inferred from physical interaction with flw inferred from physical interaction with Pp1-87B inferred from physical interaction with Pp1-13C inferred from physical interaction with Pp1_-96A	Hsap\APBB1IP <newline> Hsap\RAPH1
Wolbachia	2R_16289447_SNP	3.71e-06	Intergenic
Wolbachia	2R_16289447_SNP	3.71e-06	Intergenic
Wolbachia	2R_16289447_SNP	3.71e-06	Intergenic
Wolbachia	2L_5070014_SNP	4.91e-06	FBgn0028572	qtc	quick-to-court	0	INTRON	+	male courtship behavior ; GO:0008049 | inferred from mutant phenotype <newline> courtship behavior ; GO:0007619 | traceable author statement <newline> lateral inhibition ; GO:0046331 | inferred from mutant phenotype <newline> protein targeting to Golgi ; GO:0000042 | inferred from electronic annotation with InterPro:IPR000237 <newline> mating behavior, sex discrimination ; GO:0048047 | inferred f…	-	-	-
Wolbachia	2L_5070014_SNP	4.91e-06	FBgn0261608	RpL37A	Ribosomal protein L37A	943	5PRIME	+	translation ; GO:0006412 | inferred from sequence or structural similarity with NCBI_gi:4506643 <newline> mitotic spindle elongation ; GO:0000022 | inferred from mutant phenotype <newline> mitotic spindle organization ; GO:0007052 | inferred from mutant phenotype	cytosolic large ribosomal subunit ; GO:0022625 | inferred from sequence or structural similarity with NCBI_gi:4506643	structural constituent of ribosome ; GO:0003735 | inferred from sequence or structural similarity with NCBI_gi:4506643	Hsap\RPL37A
Wolbachia	2L_5070014_SNP	4.91e-06	FBgn0266843	CR45305	CR45305	873	3PRIME	-	-	-	-	-
Wolbachia	2L_9377253_SNP	8.91e-06	FBgn0085395	Shawl	Shaw-like	0	INTRON	-	protein homooligomerization ; GO:0051260 | inferred from electronic annotation with InterPro:IPR003131 <newline> transmembrane transport ; GO:0055085 | inferred from electronic annotation with InterPro:IPR005821 <newline> potassium ion transport ; GO:0006813 | inferred from sequence or structural similarity with eag	voltage-gated potassium channel complex ; GO:0008076 | inferred from sequence or structural similarity with eag	voltage-gated potassium channel activity ; GO:0005249 | inferred from sequence or structural similarity with HGNC_gene:KCNC2; HGNC:6234; OMIM:176256 <newline> voltage-gated cation channel activity ; GO:0022843 | inferred from sequence or structural similarity with eag <newline> delayed rectifier potassium channel activity ; GO:0005251 | inferred from biological aspect of ancestor with PANTHER:PTN…	Hsap\KCNS2 <newline> Hsap\ENSG00000129159 <newline> Hsap\KCNV1 <newline> Hsap\KCNC3 <newline> Hsap\KCNV2 <newline> Hsap\ENSG00000166006 <newline> Hsap\KCNB2 <newline> Hsap\KCNF1 <newline> Hsap\KCNC4 <newline> Hsap\KCNB1 <newline> Hsap\KCNS1 <newline> Hsap\KCNS3
Wolbachia	2L_10152543_SNP	8.43e-06	FBgn0032187	CG4839	CG4839	0	INTRON	+	protein phosphorylation ; GO:0006468 | non-traceable author statement <newline> protein phosphorylation ; GO:0006468 | inferred from electronic annotation with InterPro:IPR000719, InterPro:IPR000961, InterPro:IPR002290, InterPro:IPR008271	-	protein serine/threonine kinase activity ; GO:0004674 | non-traceable author statement <newline> cGMP-dependent protein kinase activity ; GO:0004692 | inferred from sequence or structural similarity with UniProtKB:Q61410 <newline> ATP binding ; GO:0005524 | inferred from electronic annotation with InterPro:IPR000719, InterPro:IPR000961, InterPro:IPR002290	Hsap\PRKG1 <newline> Hsap\PRKG2
Wolbachia	2L_10152543_SNP	8.43e-06	FBgn0265002	CG44153	CG44153	0	INTRON	-	biological_process ; GO:0008150 | no biological data available	membrane ; GO:0016020 | inferred from electronic annotation with InterPro:IPR001879 <newline> cellular_component ; GO:0005575 | no biological data available	G-protein coupled receptor activity ; GO:0004930 | inferred from electronic annotation with InterPro:IPR001879 <newline> molecular_function ; GO:0003674 | no biological data available	-
Wolbachia	2L_10152543_SNP	8.43e-06	XLOC_001382			0	EXON	+
Wolbachia	2L_10606239_SNP	3.76e-06	FBgn0051721	Trim9	Trim9	0	INTRON	+	axon midline choice point recognition ; GO:0016199 | inferred from mutant phenotype <newline> axon guidance ; GO:0007411 | inferred from mutant phenotype <newline> neurogenesis ; GO:0022008 | inferred from mutant phenotype <newline> netrin-activated signaling pathway ; GO:0038007 | inferred from genetic interaction with fra inferred from physical interaction with fra inferred from physical intera…	intracellular ; GO:0005622 | inferred from electronic annotation with InterPro:IPR000315, InterPro:IPR003649	zinc ion binding ; GO:0008270 | inferred from electronic annotation with InterPro:IPR000315, InterPro:IPR001841	Hsap\TRIM9 <newline> Hsap\TRIM67
Wolbachia	2L_10606239_SNP	3.76e-06	XLOC_001428			0	EXON	+
Wolbachia	2L_12737893_SNP	1.27e-06	FBgn0032456	MRP	Multidrug-Resistance like Protein 1	0	INTRON	+	response to methotrexate ; GO:0031427 | inferred from expression pattern <newline> transmembrane transport ; GO:0055085 | inferred from electronic annotation with InterPro:IPR001140, InterPro:IPR011527	integral component of membrane ; GO:0016021 | inferred from electronic annotation with InterPro:IPR001140, InterPro:IPR005292, InterPro:IPR011527	ATPase activity, coupled to transmembrane movement of substances ; GO:0042626 | inferred from direct assay <newline> ATPase activity, coupled to movement of substances ; GO:0043492 | inferred from direct assay <newline> xenobiotic-transporting ATPase activity ; GO:0008559 | inferred from sequence or structural similarity with EMBL:AF022908 <newline> ATP binding ; GO:0005524 | inferred from electr…	Hsap\ABCC4 <newline> Hsap\ABCC8 <newline> Hsap\ABCC2 <newline> Hsap\ABCC12 <newline> Hsap\ABCC9 <newline> Hsap\ABCC6 <newline> Hsap\ABCC1 <newline> Hsap\ABCC10 <newline> Hsap\ABCC5 <newline> Hsap\ABCC11
Wolbachia	2L_12737926_SNP	1.37e-06	FBgn0032456	MRP	Multidrug-Resistance like Protein 1	0	INTRON	+	response to methotrexate ; GO:0031427 | inferred from expression pattern <newline> transmembrane transport ; GO:0055085 | inferred from electronic annotation with InterPro:IPR001140, InterPro:IPR011527	integral component of membrane ; GO:0016021 | inferred from electronic annotation with InterPro:IPR001140, InterPro:IPR005292, InterPro:IPR011527	ATPase activity, coupled to transmembrane movement of substances ; GO:0042626 | inferred from direct assay <newline> ATPase activity, coupled to movement of substances ; GO:0043492 | inferred from direct assay <newline> xenobiotic-transporting ATPase activity ; GO:0008559 | inferred from sequence or structural similarity with EMBL:AF022908 <newline> ATP binding ; GO:0005524 | inferred from electr…	Hsap\ABCC4 <newline> Hsap\ABCC8 <newline> Hsap\ABCC2 <newline> Hsap\ABCC12 <newline> Hsap\ABCC9 <newline> Hsap\ABCC6 <newline> Hsap\ABCC1 <newline> Hsap\ABCC10 <newline> Hsap\ABCC5 <newline> Hsap\ABCC11
Wolbachia	2L_12737928_SNP	3.18e-06	FBgn0032456	MRP	Multidrug-Resistance like Protein 1	0	INTRON	+	response to methotrexate ; GO:0031427 | inferred from expression pattern <newline> transmembrane transport ; GO:0055085 | inferred from electronic annotation with InterPro:IPR001140, InterPro:IPR011527	integral component of membrane ; GO:0016021 | inferred from electronic annotation with InterPro:IPR001140, InterPro:IPR005292, InterPro:IPR011527	ATPase activity, coupled to transmembrane movement of substances ; GO:0042626 | inferred from direct assay <newline> ATPase activity, coupled to movement of substances ; GO:0043492 | inferred from direct assay <newline> xenobiotic-transporting ATPase activity ; GO:0008559 | inferred from sequence or structural similarity with EMBL:AF022908 <newline> ATP binding ; GO:0005524 | inferred from electr…	Hsap\ABCC4 <newline> Hsap\ABCC8 <newline> Hsap\ABCC2 <newline> Hsap\ABCC12 <newline> Hsap\ABCC9 <newline> Hsap\ABCC6 <newline> Hsap\ABCC1 <newline> Hsap\ABCC10 <newline> Hsap\ABCC5 <newline> Hsap\ABCC11
Wolbachia	3R_14335540_SNP	8.54e-06	FBgn0004652	fru	fruitless	0	INTRON	-	male courtship behavior, veined wing vibration ; GO:0016545 | inferred from mutant phenotype <newline> male courtship behavior ; GO:0008049 | inferred from mutant phenotype <newline> mating ; GO:0007618 | inferred from mutant phenotype <newline> multicellular organismal development ; GO:0007275 | inferred from mutant phenotype <newline> male courtship behavior, veined wing generated song producti…	nucleus ; GO:0005634 | non-traceable author statement	sequence-specific DNA binding transcription factor activity ; GO:0003700 | non-traceable author statement <newline> sequence-specific DNA binding transcription factor activity ; GO:0003700 | traceable author statement <newline> nucleic acid binding ; GO:0003676 | inferred from electronic annotation with InterPro:IPR013087 <newline> metal ion binding ; GO:0046872 | inferred from electronic annotat…	-
Wolbachia	3R_20743593_SNP	8.78e-06	FBgn0039249	CG11168	CG11168	235	5PRIME	+	-	-	-	-
Wolbachia	3R_20743593_SNP	8.78e-06	FBgn0265189	CG44254	CG44254	7	5PRIME	-	oxidation-reduction process ; GO:0055114 | inferred from sequence model with InterPro:IPR005123, InterPro:IPR006620, InterPro:IPR019601 <newline> oxidation-reduction process ; GO:0055114 | inferred from electronic annotation with InterPro:IPR005123, InterPro:IPR006620, InterPro:IPR019601	cellular_component ; GO:0005575 | no biological data available	oxidoreductase activity, acting on paired donors, with incorporation or reduction of molecular oxygen, 2-oxoglutarate as one donor, and incorporation of one atom each of oxygen into both donors ; GO:0016706 | inferred from sequence model with InterPro:IPR005123, InterPro:IPR019601 <newline> iron ion binding ; GO:0005506 | inferred from sequence model with InterPro:IPR006620, InterPro:IPR019601 <n…	Hsap\OGFOD1
Wolbachia	3R_20743593_SNP	8.78e-06	FBgn0265190	PIG-S	Phosphatidylinositol glycan anchor biosynthesis, class S ortholog (H. sapiens)	7	5PRIME	-	regulation of Golgi to plasma membrane protein transport ; GO:0042996 | inferred from mutant phenotype <newline> rhabdomere membrane biogenesis ; GO:0045313 | inferred from mutant phenotype <newline> attachment of GPI anchor to protein ; GO:0016255 | inferred from electronic annotation with InterPro:IPR019540	cellular_component ; GO:0005575 | no biological data available <newline> GPI-anchor transamidase complex ; GO:0042765 | inferred from electronic annotation with InterPro:IPR019540	GPI-anchor transamidase activity ; GO:0003923 | contributes_to inferred from sequence or structural similarity with MGD:Pigs; MGI:MGI:2687325	Hsap\ENSG00000087111
Wolbachia	3R_20745362_SNP	5.7e-06	FBgn0039249	CG11168	CG11168	0	INTRON	+	-	-	-	-
Wolbachia	3R_20745362_SNP	5.7e-06	XLOC_025523			0	EXON	-
Wolbachia	3L_9843986_SNP	4.95e-06	FBgn0004390	RasGAP1	Ras GTPase activating protein 1	0	INTRON	-	Ras protein signal transduction ; GO:0007265 | inferred from mutant phenotype <newline> negative regulation of Ras protein signal transduction ; GO:0046580 | non-traceable author statement <newline> anterior/posterior axis specification, embryo ; GO:0008595 | traceable author statement <newline> torso signaling pathway ; GO:0008293 | non-traceable author statement <newline> Ras protein signal tra…	plasma membrane ; GO:0005886 | inferred from direct assay <newline> cytoplasm ; GO:0005737 | inferred from biological aspect of ancestor with PANTHER:PTN000022879 <newline> intrinsic component of the cytoplasmic side of the plasma membrane ; GO:0031235 | inferred from biological aspect of ancestor with PANTHER:PTN000022879	Ras GTPase activator activity ; GO:0005099 | inferred from mutant phenotype <newline> Ras GTPase activator activity ; GO:0005099 | inferred from sequence or structural similarity with EMBL:U20238 <newline> Ras GTPase activator activity ; GO:0005099 | non-traceable author statement	Hsap\RASA3 <newline> Hsap\RASA4 <newline> Hsap\RASA4B <newline> Hsap\RASAL1 <newline> Hsap\RASA2
Wolbachia	3L_10470820_SNP	1.54e-06	Intergenic
Wolbachia	3L_10470834_SNP	3.6e-06	Intergenic
Wolbachia	3L_14619005_SNP	4.31e-06	FBgn0036433	CG9628	CG9628	0	INTRON	+	biological_process ; GO:0008150 | no biological data available	cellular_component ; GO:0005575 | no biological data available	molecular_function ; GO:0003674 | no biological data available	-
Wolbachia	3L_14965402_SNP	7.31e-06	FBgn0000216	Brd	Bearded	365	5PRIME	+	Notch signaling pathway ; GO:0007219 | inferred from mutant phenotype <newline> cell fate specification ; GO:0001708 | inferred from mutant phenotype <newline> sensory organ development ; GO:0007423 | inferred from mutant phenotype <newline> sensory organ precursor cell fate determination ; GO:0016360 | traceable author statement	-	protein binding ; GO:0005515 | inferred from physical interaction with neur	-
Wolbachia	3L_14965402_SNP	7.31e-06	Intergenic
Wolbachia	3L_14965402_SNP	7.31e-06	Intergenic
Wolbachia	3L_17477591_SNP	2.44e-06	FBgn0036731	CG6333	CG6333	0	INTRON	-	-	-	-	-
Xanthomonas vesicatoria	2R_4946138_SNP	6.81e-07	FBgn0033368	CG13743	CG13743	0	INTRON	-	amino acid transmembrane transport ; GO:0003333 | inferred from sequence or structural similarity with Eaat1	-	amino acid transmembrane transporter activity ; GO:0015171 | inferred from sequence or structural similarity with Eaat1	Hsap\ENSG00000169507
Xanthomonas vesicatoria	2R_7748779_SNP	6e-06	FBgn0013756	Mtor	Megator	72	3PRIME	+	spindle assembly ; GO:0051225 | inferred from direct assay <newline> protein import into nucleus ; GO:0006606 | inferred from electronic annotation with InterPro:IPR012929 <newline> regulation of mitotic cell cycle ; GO:0007346 | inferred from mutant phenotype <newline> mitotic spindle assembly checkpoint ; GO:0007094 | inferred from mutant phenotype <newline> regulation of mitotic sister chromat…	nuclear pore ; GO:0005643 | inferred from direct assay <newline> nuclear pore ; GO:0005643 | non-traceable author statement <newline> nucleus ; GO:0005634 | inferred from direct assay <newline> spindle midzone ; GO:0051233 | inferred from direct assay <newline> nuclear envelope ; GO:0005635 | inferred from direct assay <newline> mitotic spindle ; GO:0072686 | colocalizes_with inferred from direct…	ribonucleoprotein complex binding ; GO:0043021 | inferred from sequence or structural similarity with SGD_LOCUS:MLP1; SGD:S000001803	Hsap\TPR
Xanthomonas vesicatoria	2R_7748779_SNP	6e-06	FBgn0085259	CG34230	CG34230	36	5PRIME	+	-	-	-	-
Xanthomonas vesicatoria	2R_8391655_DEL	1.76e-06	FBgn0045063	fdl	fused lobes	0	INTRON	-	brain development ; GO:0007420 | inferred from mutant phenotype <newline> chitin catabolic process ; GO:0006032 | NOT inferred from direct assay <newline> N-glycan processing ; GO:0006491 | inferred from mutant phenotype	plasma membrane ; GO:0005886 | inferred from direct assay <newline> endoplasmic reticulum ; GO:0005783 | colocalizes_with inferred from direct assay <newline> Golgi apparatus ; GO:0005794 | colocalizes_with inferred from direct assay <newline> late endosome ; GO:0005770 | inferred from direct assay	beta-N-acetylhexosaminidase activity ; GO:0004563 | inferred from sequence or structural similarity with MGD:Hexb; MGI:MGI:96074 <newline> beta-N-acetylhexosaminidase activity ; GO:0004563 | inferred from sequence or structural similarity with UniProtKB:P49010 <newline> beta-N-acetylglucosaminidase activity ; GO:0016231 | inferred from direct assay <newline> beta-N-acetylgalactosaminidase activit…	-
Xanthomonas vesicatoria	2R_8391693_SNP	8.84e-06	FBgn0045063	fdl	fused lobes	0	INTRON	-	brain development ; GO:0007420 | inferred from mutant phenotype <newline> chitin catabolic process ; GO:0006032 | NOT inferred from direct assay <newline> N-glycan processing ; GO:0006491 | inferred from mutant phenotype	plasma membrane ; GO:0005886 | inferred from direct assay <newline> endoplasmic reticulum ; GO:0005783 | colocalizes_with inferred from direct assay <newline> Golgi apparatus ; GO:0005794 | colocalizes_with inferred from direct assay <newline> late endosome ; GO:0005770 | inferred from direct assay	beta-N-acetylhexosaminidase activity ; GO:0004563 | inferred from sequence or structural similarity with MGD:Hexb; MGI:MGI:96074 <newline> beta-N-acetylhexosaminidase activity ; GO:0004563 | inferred from sequence or structural similarity with UniProtKB:P49010 <newline> beta-N-acetylglucosaminidase activity ; GO:0016231 | inferred from direct assay <newline> beta-N-acetylgalactosaminidase activit…	-
Xanthomonas vesicatoria	2R_8391725_SNP	1.87e-06	FBgn0045063	fdl	fused lobes	0	INTRON	-	brain development ; GO:0007420 | inferred from mutant phenotype <newline> chitin catabolic process ; GO:0006032 | NOT inferred from direct assay <newline> N-glycan processing ; GO:0006491 | inferred from mutant phenotype	plasma membrane ; GO:0005886 | inferred from direct assay <newline> endoplasmic reticulum ; GO:0005783 | colocalizes_with inferred from direct assay <newline> Golgi apparatus ; GO:0005794 | colocalizes_with inferred from direct assay <newline> late endosome ; GO:0005770 | inferred from direct assay	beta-N-acetylhexosaminidase activity ; GO:0004563 | inferred from sequence or structural similarity with MGD:Hexb; MGI:MGI:96074 <newline> beta-N-acetylhexosaminidase activity ; GO:0004563 | inferred from sequence or structural similarity with UniProtKB:P49010 <newline> beta-N-acetylglucosaminidase activity ; GO:0016231 | inferred from direct assay <newline> beta-N-acetylgalactosaminidase activit…	-
Xanthomonas vesicatoria	2R_15582266_SNP	1.74e-06	FBgn0265699	CR44506	CR44506	0	EXON	+	-	-	-	-
Xanthomonas vesicatoria	2R_15582306_SNP	1.12e-06	FBgn0265699	CR44506	CR44506	0	EXON	+	-	-	-	-
Xanthomonas vesicatoria	2L_2288240_SNP	4.76e-06	FBgn0031410	CG17237	CG17237	263	3PRIME	-	-	myosin complex ; GO:0016459 | inferred from sequence or structural similarity	ATPase activity, coupled ; GO:0042623 | inferred from sequence or structural similarity <newline> calcium ion binding ; GO:0005509 | inferred from electronic annotation with InterPro:IPR011992	-
Xanthomonas vesicatoria	2L_2288240_SNP	4.76e-06	FBgn0261523	CG42658	CG42658	307	5PRIME	-	-	-	structural molecule activity ; GO:0005198 | inferred from electronic annotation with InterPro:IPR000535	-
Xanthomonas vesicatoria	2L_4213620_SNP	2.21e-07	FBgn0001075	ft	fat	0	EXON	-	establishment of planar polarity ; GO:0001736 | inferred from mutant phenotype <newline> calcium-dependent cell-cell adhesion ; GO:0016339 | non-traceable author statement <newline> cell proliferation ; GO:0008283 | inferred from mutant phenotype <newline> cell morphogenesis involved in differentiation ; GO:0000904 | inferred from mutant phenotype <newline> imaginal disc growth ; GO:0007446 | inf…	integral component of plasma membrane ; GO:0005887 | non-traceable author statement <newline> integral component of membrane ; GO:0016021 | traceable author statement <newline> integral component of plasma membrane ; GO:0005887 | inferred from sequence or structural similarity <newline> integral component of plasma membrane ; GO:0005887 | inferred from direct assay	cell adhesion molecule binding ; GO:0050839 | inferred from sequence or structural similarity <newline> receptor activity ; GO:0004872 | inferred from sequence or structural similarity <newline> cadherin binding ; GO:0045296 | inferred from physical interaction with ds <newline> calcium ion binding ; GO:0005509 | inferred from direct assay	Hsap\FAT4 <newline> Hsap\DCHS1 <newline> Hsap\DCHS2
Xanthomonas vesicatoria	2L_7262815_SNP	1.24e-06	FBgn0010453	Wnt4	Wnt oncogene analog 4	0	INTRON	-	cellular component movement ; GO:0006928 | traceable author statement <newline> focal adhesion assembly ; GO:0048041 | traceable author statement <newline> salivary gland morphogenesis ; GO:0007435 | inferred from mutant phenotype <newline> Wnt signaling pathway ; GO:0016055 | inferred from sequence or structural similarity with wg <newline> Wnt signaling pathway, planar cell polarity pathway ; G…	extracellular region ; GO:0005576 | inferred from sequence model <newline> extracellular region ; GO:0005576 | inferred from sequence or structural similarity with wg <newline> cell surface ; GO:0009986 | inferred from direct assay <newline> plasma membrane ; GO:0005886 | inferred from biological aspect of ancestor with PANTHER:PTN000246517 <newline> extracellular space ; GO:0005615 | inferred fr…	protein binding ; GO:0005515 | inferred from physical interaction with fj <newline> receptor binding ; GO:0005102 | inferred from sequence or structural similarity with wg <newline> frizzled binding ; GO:0005109 | inferred from physical interaction with fz, fz2, fz4 <newline> G-protein coupled receptor binding ; GO:0001664 | inferred from biological aspect of ancestor with PANTHER:PTN000246517	Hsap\WNT9A <newline> Hsap\WNT9B
Xanthomonas vesicatoria	2L_7397074_SNP	1.5e-06	FBgn0031906	CG5160	CG5160	0	INTRON	-	neurogenesis ; GO:0022008 | inferred from mutant phenotype <newline> small GTPase mediated signal transduction ; GO:0007264 | inferred from electronic annotation with InterPro:IPR001806 <newline> GTP catabolic process ; GO:0006184 | inferred from electronic annotation with InterPro:IPR020849	membrane ; GO:0016020 | inferred from electronic annotation with InterPro:IPR020849 <newline> cellular_component ; GO:0005575 | no biological data available	GTPase activity ; GO:0003924 | inferred from sequence or structural similarity with EMBL:K01970 <newline> GTP binding ; GO:0005525 | inferred from electronic annotation with InterPro:IPR001806, InterPro:IPR020849	Hsap\RERG
Xanthomonas vesicatoria	2L_7398225_SNP	5.91e-06	FBgn0031906	CG5160	CG5160	0	INTRON	-	neurogenesis ; GO:0022008 | inferred from mutant phenotype <newline> small GTPase mediated signal transduction ; GO:0007264 | inferred from electronic annotation with InterPro:IPR001806 <newline> GTP catabolic process ; GO:0006184 | inferred from electronic annotation with InterPro:IPR020849	membrane ; GO:0016020 | inferred from electronic annotation with InterPro:IPR020849 <newline> cellular_component ; GO:0005575 | no biological data available	GTPase activity ; GO:0003924 | inferred from sequence or structural similarity with EMBL:K01970 <newline> GTP binding ; GO:0005525 | inferred from electronic annotation with InterPro:IPR001806, InterPro:IPR020849	Hsap\RERG
Xanthomonas vesicatoria	2L_7400230_SNP	1.44e-06	FBgn0264888	CR44079	CR44079	301	3PRIME	+	-	-	-	-
Xanthomonas vesicatoria	2L_8805257_SNP	5.23e-07	Intergenic
Xanthomonas vesicatoria	3R_11144086_SNP	6.4e-06	FBgn0038315	CG14866	CG14866	79	3PRIME	+	-	-	carbohydrate binding ; GO:0030246 | inferred from sequence or structural similarity with Lectin-galC1	-
Xanthomonas vesicatoria	3R_11144086_SNP	6.4e-06	FBgn0038316	CG6276	CG6276	0	EXON	-	-	-	DNA binding ; GO:0003677 | inferred from electronic annotation with InterPro:IPR004210	-
Xanthomonas vesicatoria	3R_13582479_SNP	3.48e-06	FBgn0038542	TyrR	Tyramine receptor	0	INTRON	-	G-protein coupled receptor signaling pathway ; GO:0007186 | inferred from sequence or structural similarity <newline> octopamine or tyramine signaling pathway ; GO:0007211 | inferred by curator from GO:0008226 <newline> tyramine signaling pathway ; GO:0071928 | inferred from direct assay <newline> positive regulation of phospholipase C-activating G-protein coupled receptor signaling pathway ; GO:…	integral component of membrane ; GO:0016021 | inferred from sequence or structural similarity <newline> integral component of plasma membrane ; GO:0005887 | inferred by curator from GO:0008226 inferred from direct assay <newline> integral component of plasma membrane ; GO:0005887 | inferred from direct assay	G-protein coupled amine receptor activity ; GO:0008227 | inferred from sequence or structural similarity <newline> tyramine receptor activity ; GO:0008226 | inferred from direct assay	-
Xanthomonas vesicatoria	3R_13582529_SNP	3.48e-06	FBgn0038542	TyrR	Tyramine receptor	0	INTRON	-	G-protein coupled receptor signaling pathway ; GO:0007186 | inferred from sequence or structural similarity <newline> octopamine or tyramine signaling pathway ; GO:0007211 | inferred by curator from GO:0008226 <newline> tyramine signaling pathway ; GO:0071928 | inferred from direct assay <newline> positive regulation of phospholipase C-activating G-protein coupled receptor signaling pathway ; GO:…	integral component of membrane ; GO:0016021 | inferred from sequence or structural similarity <newline> integral component of plasma membrane ; GO:0005887 | inferred by curator from GO:0008226 inferred from direct assay <newline> integral component of plasma membrane ; GO:0005887 | inferred from direct assay	G-protein coupled amine receptor activity ; GO:0008227 | inferred from sequence or structural similarity <newline> tyramine receptor activity ; GO:0008226 | inferred from direct assay	-
Xanthomonas vesicatoria	3R_13582533_SNP	3.48e-06	FBgn0038542	TyrR	Tyramine receptor	0	INTRON	-	G-protein coupled receptor signaling pathway ; GO:0007186 | inferred from sequence or structural similarity <newline> octopamine or tyramine signaling pathway ; GO:0007211 | inferred by curator from GO:0008226 <newline> tyramine signaling pathway ; GO:0071928 | inferred from direct assay <newline> positive regulation of phospholipase C-activating G-protein coupled receptor signaling pathway ; GO:…	integral component of membrane ; GO:0016021 | inferred from sequence or structural similarity <newline> integral component of plasma membrane ; GO:0005887 | inferred by curator from GO:0008226 inferred from direct assay <newline> integral component of plasma membrane ; GO:0005887 | inferred from direct assay	G-protein coupled amine receptor activity ; GO:0008227 | inferred from sequence or structural similarity <newline> tyramine receptor activity ; GO:0008226 | inferred from direct assay	-
Xanthomonas vesicatoria	3R_13588778_SNP	4.12e-06	FBgn0038542	TyrR	Tyramine receptor	0	EXON	-	G-protein coupled receptor signaling pathway ; GO:0007186 | inferred from sequence or structural similarity <newline> octopamine or tyramine signaling pathway ; GO:0007211 | inferred by curator from GO:0008226 <newline> tyramine signaling pathway ; GO:0071928 | inferred from direct assay <newline> positive regulation of phospholipase C-activating G-protein coupled receptor signaling pathway ; GO:…	integral component of membrane ; GO:0016021 | inferred from sequence or structural similarity <newline> integral component of plasma membrane ; GO:0005887 | inferred by curator from GO:0008226 inferred from direct assay <newline> integral component of plasma membrane ; GO:0005887 | inferred from direct assay	G-protein coupled amine receptor activity ; GO:0008227 | inferred from sequence or structural similarity <newline> tyramine receptor activity ; GO:0008226 | inferred from direct assay	-
Xanthomonas vesicatoria	3R_13777245_SNP	6.17e-06	FBgn0263995	cpo	couch potato	0	INTRON	+	dormancy process ; GO:0022611 | inferred from mutant phenotype <newline> synaptic transmission ; GO:0007268 | inferred from mutant phenotype <newline> peripheral nervous system development ; GO:0007422 | non-traceable author statement <newline> cellular process ; GO:0009987 | inferred from mutant phenotype <newline> olfactory behavior ; GO:0042048 | inferred from mutant phenotype <newline> regula…	nucleus ; GO:0005634 | inferred from direct assay <newline> nucleus ; GO:0005634 | non-traceable author statement	nucleotide binding ; GO:0000166 | inferred from electronic annotation with InterPro:IPR012677 <newline> nucleic acid binding ; GO:0003676 | inferred from electronic annotation with InterPro:IPR000504 <newline> mRNA binding ; GO:0003729 | inferred from sequence or structural similarity	Hsap\RBPMS2 <newline> Hsap\RBPMS
Xanthomonas vesicatoria	3R_13777245_SNP	6.17e-06	XLOC_021144			0	EXON	+
Xanthomonas vesicatoria	3R_17308174_SNP	1.27e-06	FBgn0038889	CG7922	CG7922	0	EXON	+	-	-	helicase activity ; GO:0004386 | inferred from sequence or structural similarity <newline> ATP-dependent RNA helicase activity ; GO:0004004 | inferred from sequence or structural similarity with UniProtKB:P40562 <newline> ATP binding ; GO:0005524 | inferred from electronic annotation with InterPro:IPR001650, InterPro:IPR006935 <newline> DNA binding ; GO:0003677 | inferred from electronic annotati…	Hsap\FANCM
Xanthomonas vesicatoria	3R_17308196_SNP	6.89e-06	FBgn0038889	CG7922	CG7922	0	INTRON	+	-	-	helicase activity ; GO:0004386 | inferred from sequence or structural similarity <newline> ATP-dependent RNA helicase activity ; GO:0004004 | inferred from sequence or structural similarity with UniProtKB:P40562 <newline> ATP binding ; GO:0005524 | inferred from electronic annotation with InterPro:IPR001650, InterPro:IPR006935 <newline> DNA binding ; GO:0003677 | inferred from electronic annotati…	Hsap\FANCM
Xanthomonas vesicatoria	3R_17308798_SNP	7.7e-07	FBgn0038889	CG7922	CG7922	0	EXON	+	-	-	helicase activity ; GO:0004386 | inferred from sequence or structural similarity <newline> ATP-dependent RNA helicase activity ; GO:0004004 | inferred from sequence or structural similarity with UniProtKB:P40562 <newline> ATP binding ; GO:0005524 | inferred from electronic annotation with InterPro:IPR001650, InterPro:IPR006935 <newline> DNA binding ; GO:0003677 | inferred from electronic annotati…	Hsap\FANCM
Xanthomonas vesicatoria	3R_17309448_SNP	7.18e-06	FBgn0038889	CG7922	CG7922	0	EXON	+	-	-	helicase activity ; GO:0004386 | inferred from sequence or structural similarity <newline> ATP-dependent RNA helicase activity ; GO:0004004 | inferred from sequence or structural similarity with UniProtKB:P40562 <newline> ATP binding ; GO:0005524 | inferred from electronic annotation with InterPro:IPR001650, InterPro:IPR006935 <newline> DNA binding ; GO:0003677 | inferred from electronic annotati…	Hsap\FANCM
Xanthomonas vesicatoria	3R_17309451_SNP	1.38e-06	FBgn0038889	CG7922	CG7922	0	EXON	+	-	-	helicase activity ; GO:0004386 | inferred from sequence or structural similarity <newline> ATP-dependent RNA helicase activity ; GO:0004004 | inferred from sequence or structural similarity with UniProtKB:P40562 <newline> ATP binding ; GO:0005524 | inferred from electronic annotation with InterPro:IPR001650, InterPro:IPR006935 <newline> DNA binding ; GO:0003677 | inferred from electronic annotati…	Hsap\FANCM
Xanthomonas vesicatoria	3R_17310086_SNP	5.12e-06	FBgn0038889	CG7922	CG7922	0	EXON	+	-	-	helicase activity ; GO:0004386 | inferred from sequence or structural similarity <newline> ATP-dependent RNA helicase activity ; GO:0004004 | inferred from sequence or structural similarity with UniProtKB:P40562 <newline> ATP binding ; GO:0005524 | inferred from electronic annotation with InterPro:IPR001650, InterPro:IPR006935 <newline> DNA binding ; GO:0003677 | inferred from electronic annotati…	Hsap\FANCM
Xanthomonas vesicatoria	3R_17795373_SNP	5.34e-06	FBgn0264490	Eip93F	Ecdysone-induced protein 93F	0	INTRON	+	positive regulation of transcription from RNA polymerase II promoter ; GO:0045944 | inferred from mutant phenotype <newline> cellular response to ecdysone ; GO:0071390 | inferred from mutant phenotype <newline> regulation of transcription, DNA-templated ; GO:0006355 | non-traceable author statement <newline> autophagic cell death ; GO:0048102 | inferred from expression pattern <newline> salivary …	transcriptionally active chromatin ; GO:0035327 | inferred from direct assay colocalizes_with <newline> nucleus ; GO:0005634 | inferred from direct assay <newline> nucleus ; GO:0005634 | traceable author statement <newline> polytene chromosome ; GO:0005700 | traceable author statement <newline> nucleus ; GO:0005634 | non-traceable author statement <newline> polytene chromosome ; GO:0005700 | non-…	DNA binding ; GO:0003677 | inferred from electronic annotation with InterPro:IPR007889, InterPro:IPR011526 <newline> sequence-specific DNA binding transcription factor activity ; GO:0003700 | non-traceable author statement <newline> DNA binding ; GO:0003677 | non-traceable author statement	-
Xanthomonas vesicatoria	3R_17795373_SNP	5.34e-06	Intergenic
Xanthomonas vesicatoria	3R_20193485_SNP	2.44e-06	FBgn0053341	CG33341	CG33341	595	5PRIME	+	biological_process ; GO:0008150 | no biological data available	cellular_component ; GO:0005575 | no biological data available	molecular_function ; GO:0003674 | no biological data available	-
Xanthomonas vesicatoria	3R_20193485_SNP	2.44e-06	FBgn0261993	CG42811	CG42811	543	5PRIME	-	-	-	-	-
Xanthomonas vesicatoria	3R_20193485_SNP	2.44e-06	FBgn0261994	CG42812	CG42812	0	EXON	-	-	-	-	-
Xanthomonas vesicatoria	3R_27191377_SNP	9.28e-06	FBgn0085376	CG34347	CG34347	0	INTRON	+	-	cytoskeleton ; GO:0005856 | inferred from electronic annotation with InterPro:IPR000299	actin binding ; GO:0003779 | inferred from sequence or structural similarity with UniProtKB:Q9Z2H5 <newline> cytoskeletal protein binding ; GO:0008092 | inferred from sequence or structural similarity	Hsap\EPB41L4A
Xanthomonas vesicatoria	3R_27191377_SNP	9.28e-06	Intergenic
Xanthomonas vesicatoria	3L_5650256_SNP	8.43e-06	FBgn0035626	lin-28	lin-28	0	EXON	+	cell fate specification ; GO:0001708 | inferred from sequence or structural similarity with UniProtKB:P92186 <newline> regulation of transcription, DNA-templated ; GO:0006355 | inferred from electronic annotation with InterPro:IPR002059	cytoplasm ; GO:0005737 | inferred from sequence or structural similarity with UniProtKB:P92186	DNA binding ; GO:0003677 | inferred from electronic annotation with InterPro:IPR002059 <newline> zinc ion binding ; GO:0008270 | inferred from electronic annotation with InterPro:IPR001878, InterPro:IPR013084	Hsap\LIN28B <newline> Hsap\LIN28A
Xanthomonas vesicatoria	3L_5650256_SNP	8.43e-06	FBgn0085447	sif	still life	757	5PRIME	+	regulation of axonogenesis ; GO:0050770 | inferred from genetic interaction with LIMK1 <newline> actin cytoskeleton organization ; GO:0030036 | non-traceable author statement <newline> synaptic transmission ; GO:0007268 | non-traceable author statement <newline> regulation of synapse structure and activity ; GO:0050803 | traceable author statement <newline> positive regulation of filopodium assem…	synapse ; GO:0045202 | non-traceable author statement <newline> synapse ; GO:0045202 | inferred from direct assay	Rho guanyl-nucleotide exchange factor activity ; GO:0005089 | inferred from sequence or structural similarity <newline> guanyl-nucleotide exchange factor activity ; GO:0005085 | non-traceable author statement <newline> receptor signaling protein activity ; GO:0005057 | inferred from electronic annotation with InterPro:IPR003116 <newline> Rac guanyl-nucleotide exchange factor activity ; GO:0030676…	-
Xanthomonas vesicatoria	3L_10267894_SNP	9.59e-06	FBgn0036080	Or67d	Odorant receptor 67d	170	3PRIME	+	response to pheromone ; GO:0019236 | inferred from mutant phenotype <newline> courtship behavior ; GO:0007619 | inferred from mutant phenotype <newline> sensory perception of smell ; GO:0007608 | inferred from sequence or structural similarity with UniProtKB:P81909	integral component of membrane ; GO:0016021 | inferred from sequence or structural similarity with UniProtKB:P81909	olfactory receptor activity ; GO:0004984 | inferred from sequence or structural similarity with UniProtKB:P81909 <newline> pheromone receptor activity ; GO:0016503 | inferred from mutant phenotype <newline> odorant binding ; GO:0005549 | inferred from electronic annotation with InterPro:IPR004117	-
Xanthomonas vesicatoria	3L_10267894_SNP	9.59e-06	Intergenic
Xanthomonas vesicatoria	3L_10267894_SNP	9.59e-06	Intergenic
Xanthomonas vesicatoria	3L_11297898_SNP	5.02e-06	Intergenic
Xanthomonas vesicatoria	3L_11297898_SNP	5.02e-06	Intergenic
Streptococcus salivarius	X_15158625_SNP	6.45e-06	Intergenic
Streptococcus salivarius	X_18862015_SNP	3.4e-06	FBgn0264090	CG43759	CG43759	0	INTRON	+	inter-male aggressive behavior ; GO:0002121 | inferred from mutant phenotype	-	-	-
Streptococcus salivarius	X_21912819_SNP	4.17e-06	Intergenic
Streptococcus salivarius	X_21912819_SNP	4.17e-06	Intergenic
Streptococcus salivarius	X_21912853_SNP	4.29e-06	Intergenic
Streptococcus salivarius	X_21912853_SNP	4.29e-06	Intergenic
Streptococcus salivarius	2R_4223210_SNP	7.09e-07	FBgn0261588	pdm3	pou domain motif 3	0	INTRON	+	regulation of transcription, DNA-templated ; GO:0006355 | inferred from electronic annotation with InterPro:IPR000327, InterPro:IPR001356, InterPro:IPR012287 <newline> sensory perception of smell ; GO:0007608 | inferred from mutant phenotype <newline> axonogenesis ; GO:0007409 | inferred from mutant phenotype <newline> axon guidance ; GO:0007411 | inferred from mutant phenotype <newline> axon tar…	nucleus ; GO:0005634 | inferred from sequence or structural similarity with UniProtKB:P56223	sequence-specific DNA binding transcription factor activity ; GO:0003700 | inferred from sequence or structural similarity with UniProtKB:P56223 <newline> sequence-specific DNA binding ; GO:0043565 | inferred from electronic annotation with InterPro:IPR001356	Hsap\POU6F1 <newline> Hsap\POU6F2
Streptococcus salivarius	2R_10375380_SNP	3.44e-06	FBgn0001332	L	Lobe	0	INTRON	+	negative regulation of programmed cell death ; GO:0043069 | inferred from mutant phenotype <newline> eye-antennal disc development ; GO:0035214 | inferred from mutant phenotype <newline> negative regulation of Wnt signaling pathway ; GO:0030178 | inferred from mutant phenotype <newline> compound eye development ; GO:0048749 | inferred from mutant phenotype <newline> negative regulation of JNK cas…	cytoplasm ; GO:0005737 | non-traceable author statement	-	-
Streptococcus salivarius	2R_10375380_SNP	3.44e-06	XLOC_007476			0	EXON	+
Streptococcus salivarius	2L_3387069_SNP	3.54e-06	FBgn0259949	Sfp23F	Seminal fluid protein 23F	285	3PRIME	-	multicellular organism reproduction ; GO:0032504 | inferred from expression pattern <newline> negative regulation of proteolysis ; GO:0045861 | inferred from sequence model	extracellular space ; GO:0005615 | inferred from direct assay	serine-type endopeptidase inhibitor activity ; GO:0004867 | inferred from sequence model <newline> serine-type endopeptidase inhibitor activity ; GO:0004867 | inferred from electronic annotation with InterPro:IPR002223	-
Streptococcus salivarius	2L_3387069_SNP	3.54e-06	FBgn0259950	CG42460	CG42460	813	3PRIME	-	-	-	serine-type endopeptidase inhibitor activity ; GO:0004867 | inferred from electronic annotation with InterPro:IPR002223	-
Streptococcus salivarius	2L_3387069_SNP	3.54e-06	FBgn0266839	CR45301	CR45301	0	EXON	-	-	-	-	-
Streptococcus salivarius	2L_3387069_SNP	3.54e-06	Intergenic
Streptococcus salivarius	2L_7295891_SNP	9.53e-06	Intergenic
Streptococcus salivarius	2L_7353223_SNP	4.13e-07	FBgn0031902	Wnt6	Wnt oncogene analog 6	681	3PRIME	+	Wnt signaling pathway ; GO:0016055 | inferred from sequence or structural similarity with wg <newline> canonical Wnt signaling pathway ; GO:0060070 | inferred from biological aspect of ancestor with PANTHER:PTN000246517 <newline> negative regulation of transcription from RNA polymerase II promoter ; GO:0000122 | inferred from biological aspect of ancestor with PANTHER:PTN000246517 <newline> anter…	extracellular region ; GO:0005576 | inferred from sequence or structural similarity with wg <newline> plasma membrane ; GO:0005886 | inferred from biological aspect of ancestor with PANTHER:PTN000246517 <newline> extracellular space ; GO:0005615 | inferred from biological aspect of ancestor with PANTHER:PTN000246517	receptor binding ; GO:0005102 | inferred from sequence or structural similarity with wg <newline> G-protein coupled receptor binding ; GO:0001664 | inferred from biological aspect of ancestor with PANTHER:PTN000246517	Hsap\WNT5A <newline> Hsap\WNT11 <newline> Hsap\WNT8A <newline> Hsap\WNT2B <newline> Hsap\WNT3 <newline> Hsap\WNT7B <newline> Hsap\WNT2 <newline> Hsap\WNT8B <newline> Hsap\WNT6 <newline> Hsap\WNT3A <newline> Hsap\WNT10B <newline> Hsap\WNT1 <newline> Hsap\WNT10A <newline> Hsap\WNT7A <newline> Hsap\WNT16
Streptococcus salivarius	2L_7353223_SNP	4.13e-07	Intergenic
Streptococcus salivarius	2L_10484200_DEL	4.61e-06	FBgn0026431	Grip75	Grip75	0	INTRON	+	mitosis ; GO:0007067 | inferred from mutant phenotype <newline> microtubule nucleation ; GO:0007020 | non-traceable author statement <newline> spindle assembly involved in female meiosis II ; GO:0007058 | inferred from mutant phenotype <newline> male meiosis cytokinesis ; GO:0007112 | inferred from mutant phenotype <newline> mitotic spindle organization ; GO:0007052 | inferred from mutant phenoty…	gamma-tubulin ring complex ; GO:0008274 | non-traceable author statement <newline> spindle pole ; GO:0000922 | inferred from electronic annotation with InterPro:IPR007259 <newline> microtubule organizing center ; GO:0005815 | inferred from electronic annotation with InterPro:IPR007259	structural constituent of cytoskeleton ; GO:0005200 | non-traceable author statement <newline> tubulin binding ; GO:0015631 | inferred from sequence or structural similarity with EMBL:AF052663	Hsap\ENSG00000137822
Streptococcus salivarius	2L_11324176_SNP	5.24e-06	Intergenic
Streptococcus salivarius	3R_14815960_SNP	8.49e-06	FBgn0026239	gukh	GUK-holder	0	INTRON	+	protein localization ; GO:0008104 | inferred from mutant phenotype <newline> axon guidance ; GO:0007411 | inferred from mutant phenotype <newline> actin cytoskeleton organization ; GO:0030036 | inferred from electronic annotation with InterPro:IPR028288	presynaptic membrane ; GO:0042734 | colocalizes_with inferred from direct assay <newline> terminal bouton ; GO:0043195 | inferred from direct assay <newline> cytoskeleton ; GO:0005856 | inferred from electronic annotation with InterPro:IPR028288	protein binding ; GO:0005515 | inferred from physical interaction with dlg1 inferred from physical interaction with scrib	-
Streptococcus salivarius	3R_16437524_SNP	2.84e-06	FBgn0023097	bon	bonus	0	EXON	+	peripheral nervous system development ; GO:0007422 | traceable author statement <newline> dendrite morphogenesis ; GO:0048813 | inferred from mutant phenotype <newline> neuron development ; GO:0048666 | inferred from mutant phenotype <newline> axon guidance ; GO:0007411 | inferred from mutant phenotype <newline> chromatin organization ; GO:0006325 | inferred from mutant phenotype	nucleus ; GO:0005634 | inferred from sequence or structural similarity with EMBL:AF119043 <newline> nucleus ; GO:0005634 | inferred from direct assay <newline> nuclear chromatin ; GO:0000790 | colocalizes_with inferred from direct assay	transcription coactivator activity ; GO:0003713 | inferred from sequence or structural similarity <newline> chromatin binding ; GO:0003682 | inferred from direct assay <newline> zinc ion binding ; GO:0008270 | inferred from electronic annotation with InterPro:IPR000315, InterPro:IPR001841, InterPro:IPR001965	-
Streptococcus salivarius	3R_16437524_SNP	2.84e-06	FBgn0038814	CG15923	CG15923	0	EXON	-	regulation of cell cycle ; GO:0051726 | inferred from direct assay <newline> cilium assembly ; GO:0042384 | inferred from electronic annotation with InterPro:IPR019170 <newline> negative regulation of centrosome duplication ; GO:0010826 | inferred from electronic annotation with InterPro:IPR019170	TCTN-B9D complex ; GO:0036038 | inferred from electronic annotation with InterPro:IPR019170	-	Hsap\TMEM67
Streptococcus salivarius	3L_3050758_SNP	4.46e-06	FBgn0052484	Sk2	Sphingosine kinase 2	599	3PRIME	+	phosphorylation ; GO:0016310 | non-traceable author statement <newline> flight behavior ; GO:0007629 | inferred from mutant phenotype <newline> oviposition ; GO:0018991 | inferred from mutant phenotype <newline> phosphorylation ; GO:0016310 | inferred from direct assay <newline> sphingolipid metabolic process ; GO:0006665 | inferred from direct assay <newline> protein kinase C-activating G-protei…	-	diacylglycerol kinase activity ; GO:0004143 | non-traceable author statement <newline> D-erythro-sphingosine kinase activity ; GO:0017050 | inferred from sequence or structural similarity AND traceable author statement <newline> D-erythro-sphingosine kinase activity ; GO:0017050 | inferred from direct assay <newline> diacylglycerol kinase activity ; GO:0004143 | inferred from electronic annotatio…	-
Streptococcus salivarius	3L_3050758_SNP	4.46e-06	FBgn0052485	CG32485	CG32485	0	INTRON	+	-	-	-	-
Streptococcus salivarius	3L_3050902_SNP	7.06e-06	FBgn0052484	Sk2	Sphingosine kinase 2	743	3PRIME	+	phosphorylation ; GO:0016310 | non-traceable author statement <newline> flight behavior ; GO:0007629 | inferred from mutant phenotype <newline> oviposition ; GO:0018991 | inferred from mutant phenotype <newline> phosphorylation ; GO:0016310 | inferred from direct assay <newline> sphingolipid metabolic process ; GO:0006665 | inferred from direct assay <newline> protein kinase C-activating G-protei…	-	diacylglycerol kinase activity ; GO:0004143 | non-traceable author statement <newline> D-erythro-sphingosine kinase activity ; GO:0017050 | inferred from sequence or structural similarity AND traceable author statement <newline> D-erythro-sphingosine kinase activity ; GO:0017050 | inferred from direct assay <newline> diacylglycerol kinase activity ; GO:0004143 | inferred from electronic annotatio…	-
Streptococcus salivarius	3L_3050902_SNP	7.06e-06	FBgn0052485	CG32485	CG32485	0	INTRON	+	-	-	-	-
Streptococcus salivarius	3L_3050906_SNP	3.75e-06	FBgn0052484	Sk2	Sphingosine kinase 2	747	3PRIME	+	phosphorylation ; GO:0016310 | non-traceable author statement <newline> flight behavior ; GO:0007629 | inferred from mutant phenotype <newline> oviposition ; GO:0018991 | inferred from mutant phenotype <newline> phosphorylation ; GO:0016310 | inferred from direct assay <newline> sphingolipid metabolic process ; GO:0006665 | inferred from direct assay <newline> protein kinase C-activating G-protei…	-	diacylglycerol kinase activity ; GO:0004143 | non-traceable author statement <newline> D-erythro-sphingosine kinase activity ; GO:0017050 | inferred from sequence or structural similarity AND traceable author statement <newline> D-erythro-sphingosine kinase activity ; GO:0017050 | inferred from direct assay <newline> diacylglycerol kinase activity ; GO:0004143 | inferred from electronic annotatio…	-
Streptococcus salivarius	3L_3050906_SNP	3.75e-06	FBgn0052485	CG32485	CG32485	0	INTRON	+	-	-	-	-
Streptococcus salivarius	3L_3050920_SNP	3.84e-06	FBgn0052484	Sk2	Sphingosine kinase 2	761	3PRIME	+	phosphorylation ; GO:0016310 | non-traceable author statement <newline> flight behavior ; GO:0007629 | inferred from mutant phenotype <newline> oviposition ; GO:0018991 | inferred from mutant phenotype <newline> phosphorylation ; GO:0016310 | inferred from direct assay <newline> sphingolipid metabolic process ; GO:0006665 | inferred from direct assay <newline> protein kinase C-activating G-protei…	-	diacylglycerol kinase activity ; GO:0004143 | non-traceable author statement <newline> D-erythro-sphingosine kinase activity ; GO:0017050 | inferred from sequence or structural similarity AND traceable author statement <newline> D-erythro-sphingosine kinase activity ; GO:0017050 | inferred from direct assay <newline> diacylglycerol kinase activity ; GO:0004143 | inferred from electronic annotatio…	-
Streptococcus salivarius	3L_3050920_SNP	3.84e-06	FBgn0052485	CG32485	CG32485	0	INTRON	+	-	-	-	-
Streptococcus salivarius	3L_3050926_SNP	9.64e-06	FBgn0052484	Sk2	Sphingosine kinase 2	767	3PRIME	+	phosphorylation ; GO:0016310 | non-traceable author statement <newline> flight behavior ; GO:0007629 | inferred from mutant phenotype <newline> oviposition ; GO:0018991 | inferred from mutant phenotype <newline> phosphorylation ; GO:0016310 | inferred from direct assay <newline> sphingolipid metabolic process ; GO:0006665 | inferred from direct assay <newline> protein kinase C-activating G-protei…	-	diacylglycerol kinase activity ; GO:0004143 | non-traceable author statement <newline> D-erythro-sphingosine kinase activity ; GO:0017050 | inferred from sequence or structural similarity AND traceable author statement <newline> D-erythro-sphingosine kinase activity ; GO:0017050 | inferred from direct assay <newline> diacylglycerol kinase activity ; GO:0004143 | inferred from electronic annotatio…	-
Streptococcus salivarius	3L_3050926_SNP	9.64e-06	FBgn0052485	CG32485	CG32485	0	INTRON	+	-	-	-	-
Streptococcus salivarius	3L_7705181_SNP	3.74e-06	FBgn0052373	CG32373	CG32373	0	INTRON	+	synaptic target recognition ; GO:0008039 | inferred from mutant phenotype	-	calcium ion binding ; GO:0005509 | inferred from electronic annotation with InterPro:IPR001881, InterPro:IPR018097	Hsap\FBN3 <newline> Hsap\FBN1 <newline> Hsap\FBN2
Streptococcus salivarius	3L_7705181_SNP	3.74e-06	FBgn0261788	Ank2	Ankyrin 2	0	INTRON	-	cytoskeletal anchoring at plasma membrane ; GO:0007016 | inferred from sequence or structural similarity <newline> cytoskeletal anchoring at plasma membrane ; GO:0007016 | non-traceable author statement <newline> axon extension ; GO:0048675 | inferred from mutant phenotype <newline> neuromuscular junction development ; GO:0007528 | inferred from mutant phenotype <newline> microtubule cytoskeleton…	neuromuscular junction ; GO:0031594 | inferred from direct assay <newline> presynaptic membrane ; GO:0042734 | inferred from direct assay <newline> plasma membrane ; GO:0005886 | inferred from sequence or structural similarity <newline> terminal bouton ; GO:0043195 | inferred from direct assay <newline> plasma membrane ; GO:0005886 | inferred from direct assay <newline> presynaptic periactive zon…	structural constituent of cytoskeleton ; GO:0005200 | non-traceable author statement <newline> cytoskeletal protein binding ; GO:0008092 | inferred from sequence or structural similarity <newline> structural constituent of cytoskeleton ; GO:0005200 | inferred from sequence or structural similarity with EMBL:L40632	Hsap\ANKRD50 <newline> Hsap\ANK2 <newline> Hsap\ANKK1 <newline> Hsap\ANKRD29 <newline> Hsap\ENSG00000104321 <newline> Hsap\INVS <newline> Hsap\ANK1 <newline> Hsap\ANK3 <newline> Hsap\ENSG00000134313
Streptococcus salivarius	3L_7705181_SNP	3.74e-06	XLOC_016614			468	5PRIME	-
Streptococcus salivarius	3L_7705181_SNP	3.74e-06	XLOC_016615			205	3PRIME	-
Streptococcus salivarius	3L_7705207_SNP	8.73e-06	FBgn0052373	CG32373	CG32373	0	INTRON	+	synaptic target recognition ; GO:0008039 | inferred from mutant phenotype	-	calcium ion binding ; GO:0005509 | inferred from electronic annotation with InterPro:IPR001881, InterPro:IPR018097	Hsap\FBN3 <newline> Hsap\FBN1 <newline> Hsap\FBN2
Streptococcus salivarius	3L_7705207_SNP	8.73e-06	FBgn0261788	Ank2	Ankyrin 2	0	INTRON	-	cytoskeletal anchoring at plasma membrane ; GO:0007016 | inferred from sequence or structural similarity <newline> cytoskeletal anchoring at plasma membrane ; GO:0007016 | non-traceable author statement <newline> axon extension ; GO:0048675 | inferred from mutant phenotype <newline> neuromuscular junction development ; GO:0007528 | inferred from mutant phenotype <newline> microtubule cytoskeleton…	neuromuscular junction ; GO:0031594 | inferred from direct assay <newline> presynaptic membrane ; GO:0042734 | inferred from direct assay <newline> plasma membrane ; GO:0005886 | inferred from sequence or structural similarity <newline> terminal bouton ; GO:0043195 | inferred from direct assay <newline> plasma membrane ; GO:0005886 | inferred from direct assay <newline> presynaptic periactive zon…	structural constituent of cytoskeleton ; GO:0005200 | non-traceable author statement <newline> cytoskeletal protein binding ; GO:0008092 | inferred from sequence or structural similarity <newline> structural constituent of cytoskeleton ; GO:0005200 | inferred from sequence or structural similarity with EMBL:L40632	Hsap\ANKRD50 <newline> Hsap\ANK2 <newline> Hsap\ANKK1 <newline> Hsap\ANKRD29 <newline> Hsap\ENSG00000104321 <newline> Hsap\INVS <newline> Hsap\ANK1 <newline> Hsap\ANK3 <newline> Hsap\ENSG00000134313
Streptococcus salivarius	3L_7705207_SNP	8.73e-06	XLOC_016614			494	5PRIME	-
Streptococcus salivarius	3L_7705207_SNP	8.73e-06	XLOC_016615			179	3PRIME	-
Streptococcus salivarius	3L_7705634_SNP	2.07e-06	FBgn0052373	CG32373	CG32373	0	INTRON	+	synaptic target recognition ; GO:0008039 | inferred from mutant phenotype	-	calcium ion binding ; GO:0005509 | inferred from electronic annotation with InterPro:IPR001881, InterPro:IPR018097	Hsap\FBN3 <newline> Hsap\FBN1 <newline> Hsap\FBN2
Streptococcus salivarius	3L_7705634_SNP	2.07e-06	FBgn0261788	Ank2	Ankyrin 2	0	INTRON	-	cytoskeletal anchoring at plasma membrane ; GO:0007016 | inferred from sequence or structural similarity <newline> cytoskeletal anchoring at plasma membrane ; GO:0007016 | non-traceable author statement <newline> axon extension ; GO:0048675 | inferred from mutant phenotype <newline> neuromuscular junction development ; GO:0007528 | inferred from mutant phenotype <newline> microtubule cytoskeleton…	neuromuscular junction ; GO:0031594 | inferred from direct assay <newline> presynaptic membrane ; GO:0042734 | inferred from direct assay <newline> plasma membrane ; GO:0005886 | inferred from sequence or structural similarity <newline> terminal bouton ; GO:0043195 | inferred from direct assay <newline> plasma membrane ; GO:0005886 | inferred from direct assay <newline> presynaptic periactive zon…	structural constituent of cytoskeleton ; GO:0005200 | non-traceable author statement <newline> cytoskeletal protein binding ; GO:0008092 | inferred from sequence or structural similarity <newline> structural constituent of cytoskeleton ; GO:0005200 | inferred from sequence or structural similarity with EMBL:L40632	Hsap\ANKRD50 <newline> Hsap\ANK2 <newline> Hsap\ANKK1 <newline> Hsap\ANKRD29 <newline> Hsap\ENSG00000104321 <newline> Hsap\INVS <newline> Hsap\ANK1 <newline> Hsap\ANK3 <newline> Hsap\ENSG00000134313
Streptococcus salivarius	3L_7705634_SNP	2.07e-06	XLOC_016614			921	5PRIME	-
Streptococcus salivarius	3L_7705634_SNP	2.07e-06	XLOC_016615			0	EXON	-
Streptococcus salivarius	3L_8774510_SNP	6.26e-06	FBgn0266084	Fhos	Formin homology 2 domain containing ortholog	0	INTRON	+	muscle cell cellular homeostasis ; GO:0046716 | inferred from mutant phenotype inferred from genetic interaction with Dys inferred from genetic interaction with Dg <newline> muscle system process ; GO:0003012 | inferred from genetic interaction with Mhc inferred from expression pattern <newline> developmental programmed cell death ; GO:0010623 | inferred from mutant phenotype <newline> salivary g…	nucleus ; GO:0005634 | inferred from direct assay <newline> perinuclear region of cytoplasm ; GO:0048471 | inferred from direct assay <newline> cytoplasm ; GO:0005737 | inferred from direct assay	actin binding ; GO:0003779 | inferred from sequence or structural similarity	Hsap\ENSG00000134775 <newline> Hsap\FHOD1
Streptococcus salivarius	3L_8774510_SNP	6.26e-06	XLOC_013306			715	3PRIME	+
Streptococcus salivarius	3L_8774510_SNP	6.26e-06	XLOC_013307			406	3PRIME	+
Streptococcus salivarius	3L_8774510_SNP	6.26e-06	Intergenic
Streptococcus salivarius	3L_8774678_SNP	3.48e-06	FBgn0266084	Fhos	Formin homology 2 domain containing ortholog	0	INTRON	+	muscle cell cellular homeostasis ; GO:0046716 | inferred from mutant phenotype inferred from genetic interaction with Dys inferred from genetic interaction with Dg <newline> muscle system process ; GO:0003012 | inferred from genetic interaction with Mhc inferred from expression pattern <newline> developmental programmed cell death ; GO:0010623 | inferred from mutant phenotype <newline> salivary g…	nucleus ; GO:0005634 | inferred from direct assay <newline> perinuclear region of cytoplasm ; GO:0048471 | inferred from direct assay <newline> cytoplasm ; GO:0005737 | inferred from direct assay	actin binding ; GO:0003779 | inferred from sequence or structural similarity	Hsap\ENSG00000134775 <newline> Hsap\FHOD1
Streptococcus salivarius	3L_8774678_SNP	3.48e-06	XLOC_013306			883	3PRIME	+
Streptococcus salivarius	3L_8774678_SNP	3.48e-06	XLOC_013307			574	3PRIME	+
Streptococcus salivarius	3L_8774678_SNP	3.48e-06	Intergenic
Rhizobacter sp.	X_6783287_SNP	4.89e-06	Intergenic
Rhizobacter sp.	X_15804999_SNP	9.43e-06	FBgn0030706	CG8909	CG8909	0	EXON	+	-	-	low-density lipoprotein receptor activity ; GO:0005041 | inferred from sequence or structural similarity with EMBL:AF077847; protein_id:AAC70183 <newline> calcium ion binding ; GO:0005509 | inferred from electronic annotation with InterPro:IPR001881, InterPro:IPR018097	Hsap\LRP5 <newline> Hsap\LRP6 <newline> Hsap\LRP4
Rhizobacter sp.	X_21373247_SNP	6.41e-09	FBgn0266457	CR45082	CR45082	0	INTRON	-	-	-	-	-
Rhizobacter sp.	X_21373247_SNP	6.41e-09	XLOC_030730			0	INTRON	+
Rhizobacter sp.	X_21373362_SNP	1.34e-07	FBgn0266457	CR45082	CR45082	0	INTRON	-	-	-	-	-
Rhizobacter sp.	X_21373362_SNP	1.34e-07	XLOC_030730			0	INTRON	+
Rhizobacter sp.	X_21373572_SNP	2.07e-06	FBgn0266457	CR45082	CR45082	0	INTRON	-	-	-	-	-
Rhizobacter sp.	X_21373572_SNP	2.07e-06	XLOC_030730			0	INTRON	+
Rhizobacter sp.	X_21373578_SNP	8.74e-07	FBgn0266457	CR45082	CR45082	0	INTRON	-	-	-	-	-
Rhizobacter sp.	X_21373578_SNP	8.74e-07	XLOC_030730			0	INTRON	+
Rhizobacter sp.	X_22324093_SNP	1.28e-06	Intergenic
Rhizobacter sp.	2R_317483_SNP	8.64e-06	FBgn0260798	Gprk1	G protein-coupled receptor kinase 1	0	INTRON	-	metarhodopsin inactivation ; GO:0016060 | inferred from mutant phenotype <newline> phototransduction, visible light ; GO:0007603 | inferred from mutant phenotype <newline> protein phosphorylation ; GO:0006468 | inferred from mutant phenotype <newline> protein phosphorylation ; GO:0006468 | inferred from sequence or structural similarity <newline> signal transduction ; GO:0007165 | inferred from s…	-	G-protein coupled receptor binding ; GO:0001664 | inferred from physical interaction with ninaE <newline> ATP binding ; GO:0005524 | inferred from mutant phenotype <newline> rhodopsin kinase activity ; GO:0050254 | inferred from mutant phenotype <newline> phosphatidylinositol binding ; GO:0035091 | inferred from direct assay <newline> G-protein coupled receptor kinase activity ; GO:0004703 | infe…	Hsap\ADRBK1 <newline> Hsap\ADRBK2
Rhizobacter sp.	2R_4412545_SNP	8.3e-06	FBgn0050361	mtt	mangetout	0	INTRON	-	phospholipase C-activating G-protein coupled receptor signaling pathway ; GO:0007200 | inferred from direct assay <newline> response to insecticide ; GO:0017085 | inferred from direct assay inferred from mutant phenotype <newline> adult feeding behavior ; GO:0008343 | inferred from mutant phenotype	dendrite ; GO:0030425 | inferred from direct assay <newline> integral component of plasma membrane ; GO:0005887 | inferred from direct assay <newline> integral component of membrane ; GO:0016021 | inferred from sequence or structural similarity with mGluR	G-protein coupled receptor activity ; GO:0004930 | inferred from direct assay <newline> glutamate binding ; GO:0016595 | NOT inferred from direct assay AND inferred from sequence or structural similarity <newline> glutamate receptor activity ; GO:0008066 | NOT inferred from direct assay	Hsap\GRM2 <newline> Hsap\GRM6 <newline> Hsap\GRM1 <newline> Hsap\ENSG00000196277 <newline> Hsap\GRM5 <newline> Hsap\GRM4 <newline> Hsap\GRM8 <newline> Hsap\GRM3
Rhizobacter sp.	2R_7899321_DEL	6.31e-06	FBgn0004839	otk	off-track	0	INTRON	-	cell adhesion ; GO:0007155 | inferred from direct assay AND inferred from sequence or structural similarity <newline> protein phosphorylation ; GO:0006468 | non-traceable author statement <newline> axon guidance ; GO:0007411 | inferred from genetic interaction with Sema-1a AND inferred from genetic interaction with PlexA AND inferred from mutant phenotype <newline> axon guidance ; GO:0007411 | in…	plasma membrane ; GO:0005886 | inferred from direct assay	cell adhesion molecule binding ; GO:0050839 | inferred from direct assay AND inferred from sequence or structural similarity <newline> protein kinase activity ; GO:0004672 | inferred from direct assay <newline> receptor activity ; GO:0004872 | inferred from direct assay AND inferred from sequence or structural similarity <newline> transmembrane receptor protein tyrosine kinase activity ; GO:00047…	Hsap\PTK7
Rhizobacter sp.	2R_12885593_SNP	9.52e-06	FBgn0034175	ste24b	ste24b prenyl protease type I	522	3PRIME	-	proteolysis ; GO:0006508 | inferred from electronic annotation with InterPro:IPR001915 <newline> spermatogenesis ; GO:0007283 | inferred from mutant phenotype <newline> CAAX-box protein processing ; GO:0071586 | inferred from electronic annotation with InterPro:IPR027057	membrane ; GO:0016020 | inferred from electronic annotation with InterPro:IPR001915	metalloendopeptidase activity ; GO:0004222 | inferred from sequence or structural similarity with SGD_LOCUS:STE24; SGD:S0003878	Hsap\ZMPSTE24
Rhizobacter sp.	2R_12885593_SNP	9.52e-06	FBgn0050461	CG30461	CG30461	0	EXON	-	-	-	-	-
Rhizobacter sp.	2R_12885593_SNP	9.52e-06	FBgn0050462	ste24c	ste24c prenyl protease type I	0	EXON	-	proteolysis ; GO:0006508 | inferred from electronic annotation with InterPro:IPR001915 <newline> spermatogenesis ; GO:0007283 | inferred from mutant phenotype <newline> CAAX-box protein processing ; GO:0071586 | inferred from electronic annotation with InterPro:IPR027057	membrane ; GO:0016020 | inferred from electronic annotation with InterPro:IPR001915	metalloendopeptidase activity ; GO:0004222 | inferred from electronic annotation with InterPro:IPR001915	Hsap\ZMPSTE24
Rhizobacter sp.	2R_12891348_SNP	9.68e-06	FBgn0026402	NiPp1	Nuclear inhibitor of Protein phosphatase 1	0	INTRON	-	negative regulation of protein dephosphorylation ; GO:0035308 | inferred from mutant phenotype <newline> axon guidance ; GO:0007411 | inferred from mutant phenotype	nuclear speck ; GO:0016607 | inferred from direct assay <newline> nucleus ; GO:0005634 | inferred from sequence or structural similarity with UniProtKB:Q12972	protein phosphatase inhibitor activity ; GO:0004864 | inferred from sequence or structural similarity <newline> protein phosphatase inhibitor activity ; GO:0004864 | non-traceable author statement <newline> protein phosphatase inhibitor activity ; GO:0004864 | inferred from mutant phenotype <newline> mRNA binding ; GO:0003729 | inferred from direct assay <newline> protein serine/threonine phospha…	Hsap\PPP1R8
Rhizobacter sp.	2R_12891348_SNP	9.68e-06	FBgn0034177	CG6796	CG6796	244	3PRIME	+	asparaginyl-tRNA aminoacylation ; GO:0006421 | inferred from electronic annotation with InterPro:IPR004522	cytoplasm ; GO:0005737 | inferred from electronic annotation with InterPro:IPR002312, InterPro:IPR004364, InterPro:IPR004522, InterPro:IPR006195, InterPro:IPR018150	asparagine-tRNA ligase activity ; GO:0004816 | inferred from sequence or structural similarity with UniProtKB:P25345 <newline> ATP binding ; GO:0005524 | inferred from electronic annotation with InterPro:IPR002312, InterPro:IPR004364, InterPro:IPR004522, InterPro:IPR006195, InterPro:IPR018150 <newline> nucleic acid binding ; GO:0003676 | inferred from electronic annotation with InterPro:IPR004365	Hsap\NARS2
Rhizobacter sp.	2R_17080581_SNP	6.18e-06	FBgn0003891	tud	tudor	163	3PRIME	+	pole plasm assembly ; GO:0007315 | inferred from mutant phenotype <newline> embryo development ; GO:0009790 | traceable author statement <newline> pole plasm assembly ; GO:0007315 | traceable author statement <newline> mitochondrial rRNA export from mitochondrion ; GO:0019090 | inferred from mutant phenotype <newline> intracellular mRNA localization ; GO:0008298 | traceable author statement <newl…	mitochondrion ; GO:0005739 | traceable author statement <newline> P granule ; GO:0043186 | traceable author statement <newline> P granule ; GO:0043186 | inferred from direct assay <newline> cytoplasm ; GO:0005737 | inferred from direct assay <newline> pole plasm ; GO:0045495 | inferred from direct assay <newline> mitochondrion ; GO:0005739 | inferred from direct assay <newline> nucleus ; GO:00056…	-	-
Rhizobacter sp.	2R_17080581_SNP	6.18e-06	FBgn0034602	Lapsyn	Leucine-rich repeat activity-regulated protein at synapses	495	5PRIME	+	nervous system development ; GO:0007399 | inferred from mutant phenotype	neuronal cell body ; GO:0043025 | inferred from direct assay <newline> presynaptic membrane ; GO:0042734 | colocalizes_with inferred from direct assay	-	-
Rhizobacter sp.	2R_17493375_SNP	1.11e-06	FBgn0034638	CG10433	CG10433	0	EXON	-	defense response ; GO:0006952 | inferred from sequence or structural similarity <newline> multicellular organism reproduction ; GO:0032504 | inferred from expression pattern	extracellular space ; GO:0005615 | inferred from direct assay <newline> extracellular space ; GO:0005615 | inferred from sequence model	molecular_function ; GO:0003674 | no biological data available	-
Rhizobacter sp.	2R_17493375_SNP	1.11e-06	Intergenic
Rhizobacter sp.	2R_17493430_SNP	4.04e-07	FBgn0034638	CG10433	CG10433	0	EXON	-	defense response ; GO:0006952 | inferred from sequence or structural similarity <newline> multicellular organism reproduction ; GO:0032504 | inferred from expression pattern	extracellular space ; GO:0005615 | inferred from direct assay <newline> extracellular space ; GO:0005615 | inferred from sequence model	molecular_function ; GO:0003674 | no biological data available	-
Rhizobacter sp.	2R_17493430_SNP	4.04e-07	Intergenic
Rhizobacter sp.	2R_17493478_DEL	1.18e-06	FBgn0034638	CG10433	CG10433	0	EXON	-	defense response ; GO:0006952 | inferred from sequence or structural similarity <newline> multicellular organism reproduction ; GO:0032504 | inferred from expression pattern	extracellular space ; GO:0005615 | inferred from direct assay <newline> extracellular space ; GO:0005615 | inferred from sequence model	molecular_function ; GO:0003674 | no biological data available	-
Rhizobacter sp.	2R_17493478_DEL	1.18e-06	Intergenic
Rhizobacter sp.	2L_1720616_SNP	9.14e-06	FBgn0031359	Rim2	Rim2 ortholog (S. cerevisiae)	0	INTRON	-	mitochondrial transport ; GO:0006839 | inferred from electronic annotation with InterPro:IPR002030 <newline> deoxynucleotide transport ; GO:0030302 | inferred from mutant phenotype <newline> locomotion ; GO:0040011 | inferred from mutant phenotype <newline> mitochondrion distribution ; GO:0048311 | inferred from mutant phenotype <newline> mitochondrion organization ; GO:0007005 | inferred from mu…	mitochondrial envelope ; GO:0005740 | inferred from sequence or structural similarity <newline> mitochondrial membrane ; GO:0031966 | inferred from electronic annotation with InterPro:IPR002030 <newline> mitochondrion ; GO:0005739 | inferred from direct assay	transmembrane transporter activity ; GO:0022857 | inferred from sequence or structural similarity	Hsap\SLC25A33 <newline> Hsap\ENSG00000114120
Rhizobacter sp.	2L_1720616_SNP	9.14e-06	Intergenic
Rhizobacter sp.	2L_2384278_SNP	8.79e-06	FBgn0031422	CG9870	CG9870	0	EXON	+	GPI anchor biosynthetic process ; GO:0006506 | inferred from electronic annotation with InterPro:IPR009447	endoplasmic reticulum membrane ; GO:0005789 | inferred from electronic annotation with InterPro:IPR009447 <newline> integral component of membrane ; GO:0016021 | inferred from electronic annotation with InterPro:IPR009447	transferase activity, transferring acyl groups ; GO:0016746 | inferred from electronic annotation with InterPro:IPR009447	Hsap\PIGW
Rhizobacter sp.	2L_2384278_SNP	8.79e-06	FBgn0031423	CG3557	CG3557	483	3PRIME	-	-	-	-	-
Rhizobacter sp.	2L_6755342_SNP	1.22e-06	FBgn0031855	CG11221	CG11221	0	EXON	+	protein phosphorylation ; GO:0006468 | non-traceable author statement <newline> protein phosphorylation ; GO:0006468 | inferred from electronic annotation with InterPro:IPR000719, InterPro:IPR008271	-	protein kinase activity ; GO:0004672 | non-traceable author statement <newline> protein serine/threonine kinase activity ; GO:0004674 | inferred from sequence or structural similarity with EMBL:AB010154 <newline> ATP binding ; GO:0005524 | inferred from electronic annotation with InterPro:IPR000719	-
Rhizobacter sp.	2L_6755372_SNP	1.57e-06	FBgn0031855	CG11221	CG11221	0	EXON	+	protein phosphorylation ; GO:0006468 | non-traceable author statement <newline> protein phosphorylation ; GO:0006468 | inferred from electronic annotation with InterPro:IPR000719, InterPro:IPR008271	-	protein kinase activity ; GO:0004672 | non-traceable author statement <newline> protein serine/threonine kinase activity ; GO:0004674 | inferred from sequence or structural similarity with EMBL:AB010154 <newline> ATP binding ; GO:0005524 | inferred from electronic annotation with InterPro:IPR000719	-
Rhizobacter sp.	2L_11963021_SNP	9.92e-06	FBgn0263019	CR43314	CR43314	0	INTRON	-	-	-	-	-
Rhizobacter sp.	2L_11963021_SNP	9.92e-06	Intergenic
Rhizobacter sp.	2L_12389124_SNP	4.43e-06	FBgn0262475	bru-2	bruno-2	0	INTRON	+	negative regulation of translation ; GO:0017148 | inferred from sequence alignment with aret	cellular_component ; GO:0005575 | no biological data available	mRNA binding ; GO:0003729 | inferred from sequence or structural similarity with EMBL:U53931; protein_id:AAA98566.1 <newline> RNA binding ; GO:0003723 | inferred from sequence alignment with aret <newline> nucleotide binding ; GO:0000166 | inferred from electronic annotation with InterPro:IPR012677	Hsap\CELF1 <newline> Hsap\CELF6 <newline> Hsap\TNRC4 <newline> Hsap\CELF4 <newline> Hsap\CELF5 <newline> Hsap\ENSG00000048740
Rhizobacter sp.	2L_14151903_SNP	6.31e-06	FBgn0028906	CG17341	CG17341	0	INTRON	+	-	-	-	Hsap\NOL4 <newline> Hsap\C20orf112
Rhizobacter sp.	2L_15031000_SNP	5.4e-06	FBgn0051832	CG31832	CG31832	0	EXON	-	-	-	-	Hsap\ANGPTL3 <newline> Hsap\FGL1 <newline> Hsap\ANGPTL6 <newline> Hsap\FCN1 <newline> Hsap\ANGPT2 <newline> Hsap\FCN3 <newline> Hsap\FN1 <newline> Hsap\ANGPTL1 <newline> Hsap\FGL2 <newline> Hsap\FIBCD1 <newline> Hsap\ANGPTL4 <newline> Hsap\TNXB <newline> Hsap\ANGPTL7 <newline> Hsap\DKFZp686L10222 <newline> Hsap\TNC <newline> Hsap\FGA <newline> Hsap\FGB <newline> Hsap\ANGPT4 <newline> Hsap\MFAP4 <…
Rhizobacter sp.	2L_15031000_SNP	5.4e-06	FBgn0260446	GABA-B-R1	metabotropic GABA-B receptor subtype 1	0	INTRON	+	G-protein coupled receptor signaling pathway ; GO:0007186 | inferred from sequence or structural similarity <newline> gamma-aminobutyric acid signaling pathway ; GO:0007214 | inferred from direct assay <newline> negative regulation of adenylate cyclase activity ; GO:0007194 | inferred from direct assay	integral component of membrane ; GO:0016021 | inferred from sequence or structural similarity <newline> integral component of plasma membrane ; GO:0005887 | inferred from direct assay <newline> G-protein coupled receptor heterodimeric complex ; GO:0038039 | inferred from physical interaction with GABA-B-R2	G-protein coupled GABA receptor activity ; GO:0004965 | inferred from sequence or structural similarity <newline> G-protein coupled GABA receptor activity ; GO:0004965 | inferred from sequence or structural similarity with EMBL:AL078630; protein_id:CAB44993.1 <newline> G-protein coupled GABA receptor activity ; GO:0004965 | contributes_to inferred from direct assay <newline> protein heterodimeriz…	Hsap\GABBR2 <newline> Hsap\GABBR1
Rhizobacter sp.	2L_16104604_DEL	1.77e-06	Intergenic
Rhizobacter sp.	2L_19193851_SNP	1.05e-06	FBgn0015380	drl	derailed	0	INTRON	+	axon guidance ; GO:0007411 | inferred from mutant phenotype <newline> signal transduction ; GO:0007165 | inferred from mutant phenotype <newline> learning or memory ; GO:0007611 | inferred from mutant phenotype <newline> muscle attachment ; GO:0016203 | inferred from mutant phenotype <newline> protein phosphorylation ; GO:0006468 | non-traceable author statement <newline> olfactory learning ; GO:…	plasma membrane ; GO:0005886 | inferred from sequence or structural similarity <newline> axon ; GO:0030424 | inferred from direct assay	transmembrane receptor protein tyrosine kinase activity ; GO:0004714 | inferred from sequence or structural similarity <newline> protein tyrosine kinase activity ; GO:0004713 | non-traceable author statement <newline> transmembrane receptor protein tyrosine kinase activity ; GO:0004714 | non-traceable author statement <newline> Wnt-protein binding ; GO:0017147 | inferred from physical interaction…	Hsap\ENSG00000163785
Rhizobacter sp.	2L_20953577_SNP	9.18e-07	Intergenic
Rhizobacter sp.	2L_20953577_SNP	9.18e-07	Intergenic
Rhizobacter sp.	2L_20987969_SNP	2.29e-07	FBgn0250867	CG42238	CG42238	0	INTRON	-	-	-	-	-
Rhizobacter sp.	3R_18441229_SNP	9.11e-06	FBgn0051159	EF-G2	Elongation Factor G2	0	EXON	+	translational elongation ; GO:0006414 | inferred from sequence or structural similarity with SGD_LOCUS:MEF2; SGD:S0003638	mitochondrion ; GO:0005739 | inferred from sequence or structural similarity with SGD_LOCUS:MEF1; SGD:S0003638	translation elongation factor activity ; GO:0003746 | inferred from sequence or structural similarity with SGD_LOCUS:MEF1; SGD:S0003638 <newline> GTP binding ; GO:0005525 | inferred from electronic annotation with InterPro:IPR000640, InterPro:IPR000795, InterPro:IPR004161, InterPro:IPR005225 <newline> GTPase activity ; GO:0003924 | inferred from electronic annotation with InterPro:IPR000795	Hsap\GFM2
Rhizobacter sp.	3R_18742038_SNP	7.73e-07	FBgn0017590	klg	klingon	0	INTRON	+	R7 cell differentiation ; GO:0045466 | inferred from mutant phenotype <newline> R7 cell fate commitment ; GO:0007465 | inferred from genetic interaction with sev, Sos <newline> homophilic cell adhesion ; GO:0007156 | inferred from direct assay <newline> learning or memory ; GO:0007611 | inferred from mutant phenotype <newline> olfactory learning ; GO:0008355 | inferred from mutant phenotype <newl…	extrinsic component of plasma membrane ; GO:0019897 | inferred from sequence or structural similarity	-	-
Rhizobacter sp.	3R_21408891_SNP	9.46e-06	FBgn0011666	msi	musashi	0	INTRON	+	mRNA processing ; GO:0006397 | inferred from sequence or structural similarity with SGD_LOCUS:HRP1; SGD:S0005483 <newline> cell fate determination ; GO:0001709 | traceable author statement <newline> negative regulation of translation ; GO:0017148 | inferred from mutant phenotype <newline> negative regulation of translation ; GO:0017148 | traceable author statement <newline> stem cell maintenance …	nucleus ; GO:0005634 | inferred from direct assay	mRNA binding ; GO:0003729 | non-traceable author statement <newline> mRNA binding ; GO:0003729 | inferred from sequence or structural similarity with SGD_LOCUS:HRP1; SGD:S0005483 <newline> mRNA binding ; GO:0003729 | inferred from sequence or structural similarity <newline> translation regulator activity ; GO:0045182 | traceable author statement <newline> mRNA binding ; GO:0003729 | traceable aut…	Hsap\HNRNPA0 <newline> Hsap\DAZAP1 <newline> Hsap\HNRNPA2B1 <newline> Hsap\ENSG00000197451 <newline> Hsap\HNRNPD <newline> Hsap\MSI2 <newline> Hsap\HNRNPA1L2 <newline> Hsap\ENSG00000135486 <newline> Hsap\HNRNPA3 <newline> Hsap\HNRPDL <newline> Hsap\MSI1
Rhizobacter sp.	3R_21408891_SNP	9.46e-06	FBgn0039344	CG4582	CG4582	0	EXON	-	lipid catabolic process ; GO:0016042 | inferred from sequence or structural similarity with MGD:Lpl; MGI:MGI:96820	cellular_component ; GO:0005575 | no biological data available	lipase activity ; GO:0016298 | inferred from sequence or structural similarity with MGD:Lpl; MGI:MGI:96820	-
Rhizobacter sp.	3R_24249592_SNP	8.6e-07	FBgn0039584	beat-VI	beat-VI	0	INTRON	+	heterophilic cell-cell adhesion ; GO:0007157 | inferred from sequence or structural similarity with beat-Ic	extracellular region ; GO:0005576 | non-traceable author statement <newline> anchored component of membrane ; GO:0031225 | inferred from sequence model	molecular_function ; GO:0003674 | no biological data available	-
Rhizobacter sp.	3L_3826294_SNP	1.08e-06	FBgn0004875	enc	encore	0	INTRON	+	cystoblast division ; GO:0007282 | inferred from mutant phenotype <newline> germarium-derived egg chamber formation ; GO:0007293 | inferred from mutant phenotype <newline> germarium-derived oocyte fate determination ; GO:0007294 | inferred from mutant phenotype <newline> oocyte dorsal/ventral axis specification ; GO:0007310 | traceable author statement <newline> regulation of pole plasm oskar mRN…	cytoplasm ; GO:0005737 | non-traceable author statement <newline> cytoplasm ; GO:0005737 | inferred from direct assay	nucleic acid binding ; GO:0003676 | inferred from electronic annotation with InterPro:IPR001374	-
Rhizobacter sp.	3L_3826294_SNP	1.08e-06	FBgn0064227	Rdh	Rdh	0	INTRON	+	biological_process ; GO:0008150 | no biological data available	cellular_component ; GO:0005575 | no biological data available	molecular_function ; GO:0003674 | no biological data available	-
Rhizobacter sp.	3L_3826294_SNP	1.08e-06	XLOC_012600			0	EXON	+
Rhizobacter sp.	3L_5733349_SNP	1.78e-07	FBgn0085447	sif	still life	0	EXON	+	regulation of axonogenesis ; GO:0050770 | inferred from genetic interaction with LIMK1 <newline> actin cytoskeleton organization ; GO:0030036 | non-traceable author statement <newline> synaptic transmission ; GO:0007268 | non-traceable author statement <newline> regulation of synapse structure and activity ; GO:0050803 | traceable author statement <newline> positive regulation of filopodium assem…	synapse ; GO:0045202 | non-traceable author statement <newline> synapse ; GO:0045202 | inferred from direct assay	Rho guanyl-nucleotide exchange factor activity ; GO:0005089 | inferred from sequence or structural similarity <newline> guanyl-nucleotide exchange factor activity ; GO:0005085 | non-traceable author statement <newline> receptor signaling protein activity ; GO:0005057 | inferred from electronic annotation with InterPro:IPR003116 <newline> Rac guanyl-nucleotide exchange factor activity ; GO:0030676…	-
Rhizobacter sp.	3L_5733349_SNP	1.78e-07	Intergenic
Rhizobacter sp.	3L_5733349_SNP	1.78e-07	Intergenic
Rhizobacter sp.	3L_5734188_SNP	2.52e-06	FBgn0085447	sif	still life	0	EXON	+	regulation of axonogenesis ; GO:0050770 | inferred from genetic interaction with LIMK1 <newline> actin cytoskeleton organization ; GO:0030036 | non-traceable author statement <newline> synaptic transmission ; GO:0007268 | non-traceable author statement <newline> regulation of synapse structure and activity ; GO:0050803 | traceable author statement <newline> positive regulation of filopodium assem…	synapse ; GO:0045202 | non-traceable author statement <newline> synapse ; GO:0045202 | inferred from direct assay	Rho guanyl-nucleotide exchange factor activity ; GO:0005089 | inferred from sequence or structural similarity <newline> guanyl-nucleotide exchange factor activity ; GO:0005085 | non-traceable author statement <newline> receptor signaling protein activity ; GO:0005057 | inferred from electronic annotation with InterPro:IPR003116 <newline> Rac guanyl-nucleotide exchange factor activity ; GO:0030676…	-
Rhizobacter sp.	3L_5734188_SNP	2.52e-06	Intergenic
Rhizobacter sp.	3L_6501462_DEL	1.26e-06	FBgn0020251	sfl	sulfateless	0	INTRON	+	segment polarity determination ; GO:0007367 | inferred from mutant phenotype <newline> fibroblast growth factor receptor signaling pathway ; GO:0008543 | inferred from genetic interaction with htl AND inferred from mutant phenotype <newline> mesoderm migration involved in gastrulation ; GO:0007509 | inferred from mutant phenotype <newline> epithelial cell migration, open tracheal system ; GO:0007…	intracellular ; GO:0005622 | inferred by curator from GO:0048312 <newline> Golgi cis cisterna ; GO:0000137 | inferred from direct assay <newline> endoplasmic reticulum ; GO:0005783 | inferred from direct assay	[heparan sulfate]-glucosamine N-sulfotransferase activity ; GO:0015016 | inferred from sequence or structural similarity <newline> [heparan sulfate]-glucosamine N-sulfotransferase activity ; GO:0015016 | inferred from sequence or structural similarity with NCBI_gi:4505353 <newline> [heparan sulfate]-glucosamine N-sulfotransferase activity ; GO:0015016 | inferred from mutant phenotype <newline> [h…	Hsap\ENSG00000166507 <newline> Hsap\NDST1 <newline> Hsap\NDST3 <newline> Hsap\NDST4
Rhizobacter sp.	3L_9451071_SNP	4.71e-06	FBgn0035998	CG3437	CG3437	302	5PRIME	-	-	-	-	-
Rhizobacter sp.	3L_9451071_SNP	4.71e-06	FBgn0035999	CG3552	CG3552	0	EXON	+	-	-	catalytic activity ; GO:0003824 | inferred from electronic annotation with InterPro:IPR011146, InterPro:IPR011151	Hsap\C15orf58
Rhizobacter sp.	3L_9451079_SNP	3.31e-06	FBgn0035998	CG3437	CG3437	310	5PRIME	-	-	-	-	-
Rhizobacter sp.	3L_9451079_SNP	3.31e-06	FBgn0035999	CG3552	CG3552	0	EXON	+	-	-	catalytic activity ; GO:0003824 | inferred from electronic annotation with InterPro:IPR011146, InterPro:IPR011151	Hsap\C15orf58
Rhizobacter sp.	3L_11649982_SNP	6.83e-06	FBgn0052085	CG32085	CG32085	0	INTRON	-	-	-	-	Hsap\FBXL16
Rhizobacter sp.	3L_11650000_SNP	2.91e-06	FBgn0052085	CG32085	CG32085	0	INTRON	-	-	-	-	Hsap\FBXL16
Rhizobacter sp.	3L_11650009_SNP	3.28e-06	FBgn0052085	CG32085	CG32085	0	INTRON	-	-	-	-	Hsap\FBXL16
Rhizobacter sp.	3L_11650075_SNP	1.16e-06	FBgn0052085	CG32085	CG32085	0	INTRON	-	-	-	-	Hsap\FBXL16
Rhizobacter sp.	3L_18186833_SNP	9.34e-06	Intergenic
Rhizobacter sp.	3L_18186833_SNP	9.34e-06	Intergenic
Rhizobacter sp.	3L_18186833_SNP	9.34e-06	Intergenic
Rhizobacter sp.	3L_18717548_DEL	8.86e-06	FBgn0264717	CR43985	CR43985	136	3PRIME	+	-	-	-	-
Rhizobacter sp.	3L_18717548_DEL	8.86e-06	Intergenic
Rhizobacter sp.	3L_22106148_SNP	5.79e-06	Intergenic
Rhizobacter sp.	3L_22106798_SNP	5.08e-06	Intergenic
Rhizobacter sp.	3L_22106798_SNP	5.08e-06	Intergenic
Drosophila A	X_2523398_SNP	1.36e-07	FBgn0267350	PI4KIIIalpha	Phosphatidylinositol 4-kinase III alpha	0	EXON	+	phosphorylation ; GO:0016310 | non-traceable author statement <newline> oocyte development ; GO:0048599 | inferred from mutant phenotype <newline> hippo signaling ; GO:0035329 | inferred from mutant phenotype <newline> regulation of synaptic growth at neuromuscular junction ; GO:0008582 | inferred from mutant phenotype <newline> phosphatidylinositol-mediated signaling ; GO:0048015 | inferred from…	cellular_component ; GO:0005575 | no biological data available	1-phosphatidylinositol 4-kinase activity ; GO:0004430 | non-traceable author statement <newline> 1-phosphatidylinositol 4-kinase activity ; GO:0004430 | inferred from sequence or structural similarity <newline> 1-phosphatidylinositol 4-kinase activity ; GO:0004430 | inferred from sequence or structural similarity with EMBL:D83538; protein_id:BAA19614	Hsap\PI4KA
Drosophila A	X_3937902_SNP	4.99e-06	Intergenic
Drosophila A	X_3937902_SNP	4.99e-06	Intergenic
Drosophila A	X_15486424_INS	6.57e-06	FBgn0030662	CG9220	CG9220	0	INTRON	-	chondroitin sulfate biosynthetic process ; GO:0030206 | non-traceable author statement	Golgi cisterna membrane ; GO:0032580 | inferred from electronic annotation with InterPro:IPR008428	acetylglucosaminyltransferase activity ; GO:0008375 | non-traceable author statement <newline> glucuronosyltransferase activity ; GO:0015020 | non-traceable author statement <newline> transferase activity, transferring hexosyl groups ; GO:0016758 | inferred from electronic annotation with InterPro:IPR008428	Hsap\CHSY1 <newline> Hsap\CHSY3
Drosophila A	X_16908542_SNP	2.93e-07	FBgn0266354	CG45002	CG45002	0	INTRON	-	proteolysis ; GO:0006508 | inferred from electronic annotation with InterPro:IPR001375, InterPro:IPR002469	membrane ; GO:0016020 | inferred from electronic annotation with InterPro:IPR002469	dipeptidyl-peptidase activity ; GO:0008239 | inferred from sequence or structural similarity with EMBL:AF092507 <newline> serine-type peptidase activity ; GO:0008236 | inferred from electronic annotation with InterPro:IPR001375	-
Drosophila A	X_16908542_SNP	2.93e-07	Intergenic
Drosophila A	2R_3568261_SNP	5.28e-06	FBgn0033212	CG1399	CG1399	0	INTRON	-	cilium assembly ; GO:0042384 | inferred from sequence model	-	myosin I binding ; GO:0017024 | inferred from sequence or structural similarity with EMBL:U89688	Hsap\RLTPR <newline> Hsap\LRRC16A <newline> Hsap\LRRC16B
Drosophila A	2R_3568261_SNP	5.28e-06	Intergenic
Drosophila A	2R_16189254_SNP	9.54e-06	FBgn0265851	CR44640	CR44640	446	5PRIME	+	-	-	-	-
Drosophila A	2R_16189254_SNP	9.54e-06	Intergenic
Drosophila A	2R_16189254_SNP	9.54e-06	Intergenic
Drosophila A	2L_11399848_SNP	8.65e-06	Intergenic
Drosophila A	2L_14223697_SNP	8.07e-06	FBgn0016930	Dyrk2	Dual-specificity tyrosine phosphorylation-regulated kinase 2	0	INTRON	-	protein phosphorylation ; GO:0006468 | non-traceable author statement <newline> protein phosphorylation ; GO:0006468 | inferred from direct assay <newline> olfactory behavior ; GO:0042048 | inferred from mutant phenotype <newline> sensory perception of smell ; GO:0007608 | inferred from mutant phenotype <newline> response to light stimulus ; GO:0009416 | inferred from mutant phenotype	cytosol ; GO:0005829 | inferred from direct assay	protein kinase activity ; GO:0004672 | non-traceable author statement <newline> protein serine/threonine kinase activity ; GO:0004674 | inferred from sequence or structural similarity <newline> ATP binding ; GO:0005524 | inferred from direct assay <newline> protein tyrosine kinase activity ; GO:0004713 | NOT inferred from direct assay <newline> protein serine/threonine kinase activity ; GO:000467…	Hsap\DYRK3 <newline> Hsap\DYRK1B <newline> Hsap\ENSG00000157540 <newline> Hsap\DYRK2 <newline> Hsap\DYRK4
Drosophila A	3R_17760408_SNP	8.57e-06	Intergenic
Drosophila A	3L_5853823_SNP	2.03e-06	Intergenic
Acidovorax temperans	2R_8673055_SNP	2.85e-06	FBgn0003326	sca	scabrous	0	INTRON	+	chaeta morphogenesis ; GO:0008407 | inferred from mutant phenotype <newline> nervous system development ; GO:0007399 | inferred from genetic interaction with N <newline> female meiosis chromosome segregation ; GO:0016321 | inferred from mutant phenotype <newline> ommatidial rotation ; GO:0016318 | inferred from mutant phenotype <newline> nervous system development ; GO:0007399 | non-traceable aut…	fibrinogen complex ; GO:0005577 | inferred from sequence or structural similarity with NCBI_gi:4758348 <newline> extracellular region ; GO:0005576 | non-traceable author statement	signal transducer activity ; GO:0004871 | traceable author statement	Hsap\ANGPTL3 <newline> Hsap\FGL1 <newline> Hsap\ANGPTL6 <newline> Hsap\FCN1 <newline> Hsap\ANGPT2 <newline> Hsap\FCN3 <newline> Hsap\FN1 <newline> Hsap\ANGPTL1 <newline> Hsap\FGL2 <newline> Hsap\FIBCD1 <newline> Hsap\ANGPTL4 <newline> Hsap\TNXB <newline> Hsap\ANGPTL7 <newline> Hsap\DKFZp686L10222 <newline> Hsap\TNC <newline> Hsap\FGA <newline> Hsap\FGB <newline> Hsap\ANGPT4 <newline> Hsap\MFAP4 <…
Acidovorax temperans	2R_8673055_SNP	2.85e-06	FBgn0266630	CR45137	CR45137	0	EXON	-	-	-	-	-
Acidovorax temperans	2R_17260792_SNP	4.83e-06	FBgn0000395	cv-2	crossveinless 2	0	INTRON	-	imaginal disc-derived wing vein specification ; GO:0007474 | inferred from mutant phenotype <newline> imaginal disc-derived wing morphogenesis ; GO:0007476 | inferred from mutant phenotype <newline> regulation of BMP signaling pathway ; GO:0030510 | inferred from genetic interaction with sog inferred from physical interaction with tkv inferred from physical interaction with dpp inferred from phys…	cell surface ; GO:0009986 | inferred from direct assay	BMP binding ; GO:0036122 | inferred from physical interaction with dpp inferred from physical interaction with gbb <newline> BMP receptor binding ; GO:0070700 | inferred from physical interaction with tkv <newline> heparan sulfate proteoglycan binding ; GO:0043395 | inferred from genetic interaction with botv	Hsap\BMPER
Acidovorax temperans	2R_17260795_SNP	4.83e-06	FBgn0000395	cv-2	crossveinless 2	0	INTRON	-	imaginal disc-derived wing vein specification ; GO:0007474 | inferred from mutant phenotype <newline> imaginal disc-derived wing morphogenesis ; GO:0007476 | inferred from mutant phenotype <newline> regulation of BMP signaling pathway ; GO:0030510 | inferred from genetic interaction with sog inferred from physical interaction with tkv inferred from physical interaction with dpp inferred from phys…	cell surface ; GO:0009986 | inferred from direct assay	BMP binding ; GO:0036122 | inferred from physical interaction with dpp inferred from physical interaction with gbb <newline> BMP receptor binding ; GO:0070700 | inferred from physical interaction with tkv <newline> heparan sulfate proteoglycan binding ; GO:0043395 | inferred from genetic interaction with botv	Hsap\BMPER
Acidovorax temperans	2R_17260810_SNP	4.83e-06	FBgn0000395	cv-2	crossveinless 2	0	INTRON	-	imaginal disc-derived wing vein specification ; GO:0007474 | inferred from mutant phenotype <newline> imaginal disc-derived wing morphogenesis ; GO:0007476 | inferred from mutant phenotype <newline> regulation of BMP signaling pathway ; GO:0030510 | inferred from genetic interaction with sog inferred from physical interaction with tkv inferred from physical interaction with dpp inferred from phys…	cell surface ; GO:0009986 | inferred from direct assay	BMP binding ; GO:0036122 | inferred from physical interaction with dpp inferred from physical interaction with gbb <newline> BMP receptor binding ; GO:0070700 | inferred from physical interaction with tkv <newline> heparan sulfate proteoglycan binding ; GO:0043395 | inferred from genetic interaction with botv	Hsap\BMPER
Acidovorax temperans	2R_17260811_SNP	4.83e-06	FBgn0000395	cv-2	crossveinless 2	0	INTRON	-	imaginal disc-derived wing vein specification ; GO:0007474 | inferred from mutant phenotype <newline> imaginal disc-derived wing morphogenesis ; GO:0007476 | inferred from mutant phenotype <newline> regulation of BMP signaling pathway ; GO:0030510 | inferred from genetic interaction with sog inferred from physical interaction with tkv inferred from physical interaction with dpp inferred from phys…	cell surface ; GO:0009986 | inferred from direct assay	BMP binding ; GO:0036122 | inferred from physical interaction with dpp inferred from physical interaction with gbb <newline> BMP receptor binding ; GO:0070700 | inferred from physical interaction with tkv <newline> heparan sulfate proteoglycan binding ; GO:0043395 | inferred from genetic interaction with botv	Hsap\BMPER
Acidovorax temperans	2R_17260821_SNP	4.83e-06	FBgn0000395	cv-2	crossveinless 2	0	INTRON	-	imaginal disc-derived wing vein specification ; GO:0007474 | inferred from mutant phenotype <newline> imaginal disc-derived wing morphogenesis ; GO:0007476 | inferred from mutant phenotype <newline> regulation of BMP signaling pathway ; GO:0030510 | inferred from genetic interaction with sog inferred from physical interaction with tkv inferred from physical interaction with dpp inferred from phys…	cell surface ; GO:0009986 | inferred from direct assay	BMP binding ; GO:0036122 | inferred from physical interaction with dpp inferred from physical interaction with gbb <newline> BMP receptor binding ; GO:0070700 | inferred from physical interaction with tkv <newline> heparan sulfate proteoglycan binding ; GO:0043395 | inferred from genetic interaction with botv	Hsap\BMPER
Acidovorax temperans	2R_17260825_SNP	5.35e-06	FBgn0000395	cv-2	crossveinless 2	0	INTRON	-	imaginal disc-derived wing vein specification ; GO:0007474 | inferred from mutant phenotype <newline> imaginal disc-derived wing morphogenesis ; GO:0007476 | inferred from mutant phenotype <newline> regulation of BMP signaling pathway ; GO:0030510 | inferred from genetic interaction with sog inferred from physical interaction with tkv inferred from physical interaction with dpp inferred from phys…	cell surface ; GO:0009986 | inferred from direct assay	BMP binding ; GO:0036122 | inferred from physical interaction with dpp inferred from physical interaction with gbb <newline> BMP receptor binding ; GO:0070700 | inferred from physical interaction with tkv <newline> heparan sulfate proteoglycan binding ; GO:0043395 | inferred from genetic interaction with botv	Hsap\BMPER
Acidovorax temperans	2R_19870314_SNP	9.35e-06	FBgn0005612	Sox14	Sox box protein 14	0	INTRON	+	metamorphosis ; GO:0007552 | inferred from mutant phenotype <newline> dendrite morphogenesis ; GO:0048813 | inferred from genetic interaction with Mical <newline> neuron remodeling ; GO:0016322 | inferred from genetic interaction with Mical <newline> regulation of transcription, DNA-templated ; GO:0006355 | inferred from sequence or structural similarity with UniProtKB:Q06945 <newline> regulation…	nucleus ; GO:0005634 | inferred from sequence or structural similarity with UniProtKB:Q06945 <newline> nucleus ; GO:0005634 | non-traceable author statement <newline> nucleus ; GO:0005634 | inferred from mutant phenotype	sequence-specific DNA binding transcription factor activity ; GO:0003700 | inferred from sequence or structural similarity with UniProtKB:Q06945 <newline> DNA binding, bending ; GO:0008301 | inferred from direct assay <newline> sequence-specific DNA binding ; GO:0043565 | inferred from direct assay	-
Acidovorax temperans	2L_1906936_SNP	1.52e-06	FBgn0031374	CG7337	CG7337	0	INTRON	+	-	-	-	Hsap\WDR62 <newline> Hsap\MAPKBP1
Acidovorax temperans	2L_1906936_SNP	1.52e-06	XLOC_000249			0	EXON	+
Acidovorax temperans	2L_1906936_SNP	1.52e-06	XLOC_000250			326	5PRIME	+
Acidovorax temperans	2L_6832029_SNP	6.36e-06	FBgn0051632	sens-2	senseless-2	0	INTRON	+	-	nucleus ; GO:0005634 | inferred from sequence or structural similarity with InterPro:IPR007087	nucleic acid binding ; GO:0003676 | inferred from sequence or structural similarity with InterPro:IPR007087 <newline> zinc ion binding ; GO:0008270 | inferred from electronic annotation with InterPro:IPR001878, InterPro:IPR007087, InterPro:IPR015880	Hsap\GFI1B <newline> Hsap\GFI1
Acidovorax temperans	2L_6832029_SNP	6.36e-06	Intergenic
Acidovorax temperans	2L_9345227_SNP	1.74e-06	FBgn0032110	CG3748	CG3748	450	3PRIME	+	-	-	-	-
Acidovorax temperans	2L_11448729_SNP	3.52e-06	Intergenic
Acidovorax temperans	2L_11448729_SNP	3.52e-06	Intergenic
Acidovorax temperans	2L_11448729_SNP	3.52e-06	Intergenic
Acidovorax temperans	2L_11448729_SNP	3.52e-06	Intergenic
Acidovorax temperans	2L_12488916_SNP	4.92e-06	FBgn0259176	bun	bunched	0	INTRON	-	decapentaplegic signaling pathway ; GO:0008101 | inferred from genetic interaction with dpp <newline> compound eye photoreceptor cell differentiation ; GO:0001751 | inferred from mutant phenotype <newline> segmentation ; GO:0035282 | inferred from mutant phenotype <newline> dorsal appendage formation ; GO:0046843 | inferred from mutant phenotype <newline> chorion-containing eggshell formation ; G…	cytoplasm ; GO:0005737 | inferred from direct assay <newline> nucleus ; GO:0005634 | non-traceable author statement <newline> cytoplasm ; GO:0005737 | non-traceable author statement	protein homodimerization activity ; GO:0042803 | inferred from sequence or structural similarity <newline> sequence-specific DNA binding transcription factor activity ; GO:0003700 | inferred from electronic annotation with InterPro:IPR000580	-
Acidovorax temperans	2L_12511638_SNP	4.91e-06	FBgn0259176	bun	bunched	0	INTRON	-	decapentaplegic signaling pathway ; GO:0008101 | inferred from genetic interaction with dpp <newline> compound eye photoreceptor cell differentiation ; GO:0001751 | inferred from mutant phenotype <newline> segmentation ; GO:0035282 | inferred from mutant phenotype <newline> dorsal appendage formation ; GO:0046843 | inferred from mutant phenotype <newline> chorion-containing eggshell formation ; G…	cytoplasm ; GO:0005737 | inferred from direct assay <newline> nucleus ; GO:0005634 | non-traceable author statement <newline> cytoplasm ; GO:0005737 | non-traceable author statement	protein homodimerization activity ; GO:0042803 | inferred from sequence or structural similarity <newline> sequence-specific DNA binding transcription factor activity ; GO:0003700 | inferred from electronic annotation with InterPro:IPR000580	-
Acidovorax temperans	2L_14139197_SNP	1.9e-06	FBgn0028906	CG17341	CG17341	0	INTRON	+	-	-	-	Hsap\NOL4 <newline> Hsap\C20orf112
Acidovorax temperans	2L_14140915_SNP	5.25e-07	FBgn0028906	CG17341	CG17341	0	INTRON	+	-	-	-	Hsap\NOL4 <newline> Hsap\C20orf112
Acidovorax temperans	2L_14158139_SNP	1.41e-06	FBgn0028906	CG17341	CG17341	0	EXON	+	-	-	-	Hsap\NOL4 <newline> Hsap\C20orf112
Acidovorax temperans	2L_14158415_SNP	4.31e-10	FBgn0028906	CG17341	CG17341	0	EXON	+	-	-	-	Hsap\NOL4 <newline> Hsap\C20orf112
Acidovorax temperans	2L_14163181_SNP	1.79e-06	FBgn0263037	CG43332	CG43332	0	INTRON	-	biological_process ; GO:0008150 | no biological data available	cellular_component ; GO:0005575 | no biological data available	molecular_function ; GO:0003674 | no biological data available	-
Acidovorax temperans	2L_14163181_SNP	1.79e-06	FBgn0263038	CG43333	CG43333	327	3PRIME	-	biological_process ; GO:0008150 | no biological data available	cellular_component ; GO:0005575 | no biological data available	molecular_function ; GO:0003674 | no biological data available	-
Acidovorax temperans	2L_14163181_SNP	1.79e-06	Intergenic
Acidovorax temperans	2L_14163338_SNP	1.71e-06	FBgn0263037	CG43332	CG43332	116	5PRIME	-	biological_process ; GO:0008150 | no biological data available	cellular_component ; GO:0005575 | no biological data available	molecular_function ; GO:0003674 | no biological data available	-
Acidovorax temperans	2L_14163338_SNP	1.71e-06	FBgn0263038	CG43333	CG43333	170	3PRIME	-	biological_process ; GO:0008150 | no biological data available	cellular_component ; GO:0005575 | no biological data available	molecular_function ; GO:0003674 | no biological data available	-
Acidovorax temperans	2L_14163338_SNP	1.71e-06	Intergenic
Acidovorax temperans	2L_14164119_SNP	1.1e-06	FBgn0263037	CG43332	CG43332	897	5PRIME	-	biological_process ; GO:0008150 | no biological data available	cellular_component ; GO:0005575 | no biological data available	molecular_function ; GO:0003674 | no biological data available	-
Acidovorax temperans	2L_14164119_SNP	1.1e-06	FBgn0263038	CG43333	CG43333	0	EXON	-	biological_process ; GO:0008150 | no biological data available	cellular_component ; GO:0005575 | no biological data available	molecular_function ; GO:0003674 | no biological data available	-
Acidovorax temperans	2L_14164119_SNP	1.1e-06	Intergenic
Acidovorax temperans	2L_14164119_SNP	1.1e-06	Intergenic
Acidovorax temperans	3R_15810178_DEL	2.48e-09	FBgn0038755	Hs6st	Heparan sulfate 6-O-sulfotransferase	0	INTRON	-	fibroblast growth factor receptor signaling pathway ; GO:0008543 | traceable author statement <newline> heparan sulfate proteoglycan biosynthetic process ; GO:0015012 | traceable author statement <newline> primary branching, open tracheal system ; GO:0007428 | traceable author statement <newline> open tracheal system development ; GO:0007424 | inferred from mutant phenotype inferred from genetic …	integral component of membrane ; GO:0016021 | inferred from electronic annotation with InterPro:IPR005331, InterPro:IPR010635	heparan sulfate 6-O-sulfotransferase activity ; GO:0017095 | non-traceable author statement <newline> sulfotransferase activity ; GO:0008146 | inferred from electronic annotation with InterPro:IPR005331, InterPro:IPR010635	Hsap\HS6ST2 <newline> Hsap\HS6ST1 <newline> Hsap\HS6ST3
Acidovorax temperans	3R_15810178_DEL	2.48e-09	XLOC_024923			0	EXON	-
Acidovorax temperans	3R_15810959_SNP	8.71e-08	FBgn0038755	Hs6st	Heparan sulfate 6-O-sulfotransferase	0	INTRON	-	fibroblast growth factor receptor signaling pathway ; GO:0008543 | traceable author statement <newline> heparan sulfate proteoglycan biosynthetic process ; GO:0015012 | traceable author statement <newline> primary branching, open tracheal system ; GO:0007428 | traceable author statement <newline> open tracheal system development ; GO:0007424 | inferred from mutant phenotype inferred from genetic …	integral component of membrane ; GO:0016021 | inferred from electronic annotation with InterPro:IPR005331, InterPro:IPR010635	heparan sulfate 6-O-sulfotransferase activity ; GO:0017095 | non-traceable author statement <newline> sulfotransferase activity ; GO:0008146 | inferred from electronic annotation with InterPro:IPR005331, InterPro:IPR010635	Hsap\HS6ST2 <newline> Hsap\HS6ST1 <newline> Hsap\HS6ST3
Acidovorax temperans	3R_15810959_SNP	8.71e-08	XLOC_024923			0	EXON	-
Acidovorax temperans	3R_17829484_SNP	5.26e-06	FBgn0264490	Eip93F	Ecdysone-induced protein 93F	0	INTRON	+	positive regulation of transcription from RNA polymerase II promoter ; GO:0045944 | inferred from mutant phenotype <newline> cellular response to ecdysone ; GO:0071390 | inferred from mutant phenotype <newline> regulation of transcription, DNA-templated ; GO:0006355 | non-traceable author statement <newline> autophagic cell death ; GO:0048102 | inferred from expression pattern <newline> salivary …	transcriptionally active chromatin ; GO:0035327 | inferred from direct assay colocalizes_with <newline> nucleus ; GO:0005634 | inferred from direct assay <newline> nucleus ; GO:0005634 | traceable author statement <newline> polytene chromosome ; GO:0005700 | traceable author statement <newline> nucleus ; GO:0005634 | non-traceable author statement <newline> polytene chromosome ; GO:0005700 | non-…	DNA binding ; GO:0003677 | inferred from electronic annotation with InterPro:IPR007889, InterPro:IPR011526 <newline> sequence-specific DNA binding transcription factor activity ; GO:0003700 | non-traceable author statement <newline> DNA binding ; GO:0003677 | non-traceable author statement	-
Acidovorax temperans	3R_22418705_SNP	1.28e-06	FBgn0263289	scrib	scribbled	0	INTRON	+	Malpighian tubule development ; GO:0072002 | inferred from mutant phenotype <newline> stem cell proliferation ; GO:0072089 | inferred from mutant phenotype <newline> stem cell differentiation ; GO:0048863 | inferred from mutant phenotype <newline> positive regulation of antibacterial peptide biosynthetic process ; GO:0006963 | inferred from mutant phenotype <newline> cell proliferation ; GO:00082…	basolateral plasma membrane ; GO:0016323 | inferred from direct assay <newline> septate junction ; GO:0005918 | inferred from direct assay <newline> apicolateral plasma membrane ; GO:0016327 | inferred from direct assay <newline> lateral plasma membrane ; GO:0016328 | inferred from direct assay <newline> septate junction ; GO:0005918 | traceable author statement <newline> septate junction ; GO:00…	protein binding ; GO:0005515 | inferred from physical interaction with gukh	Hsap\ENSG00000180900
Acidovorax temperans	3R_23363533_SNP	7.75e-06	FBgn0265315	CR44288	CR44288	422	5PRIME	+	-	-	-	-
Acidovorax temperans	3R_23363533_SNP	7.75e-06	FBgn0265316	CR44289	CR44289	0	EXON	-	-	-	-	-
Acidovorax temperans	3R_23363533_SNP	7.75e-06	Intergenic
Acidovorax temperans	3R_25287571_SNP	7.59e-06	FBgn0004369	Ptp99A	Protein tyrosine phosphatase 99A	0	EXON	+	protein dephosphorylation ; GO:0006470 | inferred from sequence or structural similarity with EMBL:X54132; protein_id:CAA38067.1 <newline> defasciculation of motor neuron axon ; GO:0007415 | inferred from genetic interaction with Ptp69D <newline> motor neuron axon guidance ; GO:0008045 | inferred from genetic interaction with Ptp69D <newline> axonal defasciculation ; GO:0007414 | traceable author…	plasma membrane ; GO:0005886 | inferred from sequence or structural similarity <newline> plasma membrane ; GO:0005886 | non-traceable author statement <newline> axon ; GO:0030424 | inferred from direct assay <newline> plasma membrane ; GO:0005886 | inferred from direct assay	transmembrane receptor protein tyrosine phosphatase activity ; GO:0005001 | inferred from sequence or structural similarity <newline> protein tyrosine phosphatase activity ; GO:0004725 | inferred from sequence or structural similarity with EMBL:X54132; protein_id:CAA38067.1 <newline> protein tyrosine phosphatase activity ; GO:0004725 | inferred from sequence or structural similarity with HGNC_gen…	-
Acidovorax temperans	3R_25287571_SNP	7.59e-06	Intergenic
Acidovorax temperans	3L_8054502_SNP	5.68e-06	FBgn0052359	tRNA:CR32359	transfer RNA:CR32359	869	5PRIME	-	translation ; GO:0006412 | inferred by curator from GO:0033420	cytosol ; GO:0005829 | inferred by curator from GO:0033420	CUG codon-amino acid adaptor activity ; GO:0033420 | inferred from sequence model	-
Acidovorax temperans	3L_8054502_SNP	5.68e-06	FBgn0052360	tRNA:CR32360	transfer RNA:CR32360	646	5PRIME	-	translation ; GO:0006412 | inferred by curator from GO:0033420	cytosol ; GO:0005829 | inferred by curator from GO:0033420	CUG codon-amino acid adaptor activity ; GO:0033420 | inferred from sequence model	-
Acidovorax temperans	3L_8054502_SNP	5.68e-06	Intergenic
Acidovorax temperans	3L_8071893_SNP	4.46e-06	FBgn0262579	Ect4	Ectoderm-expressed 4	0	INTRON	+	signal transduction ; GO:0007165 | inferred from electronic annotation with InterPro:IPR000157 <newline> regulation of neuron death ; GO:1901214 | inferred from mutant phenotype	neuronal cell body ; GO:0043025 | inferred from direct assay <newline> neuron projection ; GO:0043005 | inferred from direct assay	-	Hsap\ENSG00000004139
Acidovorax temperans	3L_11667524_SNP	8.85e-06	FBgn0052085	CG32085	CG32085	0	EXON	-	-	-	-	Hsap\FBXL16
Acidovorax temperans	3L_17047921_SNP	1.13e-06	FBgn0036697	rogdi	rogdi	0	EXON	+	learning or memory ; GO:0007611 | inferred from mutant phenotype <newline> olfactory learning ; GO:0008355 | inferred from mutant phenotype <newline> behavioral response to ethanol ; GO:0048149 | inferred from mutant phenotype	cellular_component ; GO:0005575 | no biological data available	molecular_function ; GO:0003674 | no biological data available	Hsap\ROGDI
Acidovorax temperans	3L_17047921_SNP	1.13e-06	FBgn0036698	CG7724	CG7724	792	5PRIME	+	oxidation-reduction process ; GO:0055114 | inferred from electronic annotation with InterPro:IPR002225 <newline> steroid biosynthetic process ; GO:0006694 | inferred from electronic annotation with InterPro:IPR002225	-	oxidoreductase activity, acting on CH-OH group of donors ; GO:0016614 | inferred from sequence or structural similarity with NCBI_gi:4504509 <newline> 3-beta-hydroxy-delta5-steroid dehydrogenase activity ; GO:0003854 | inferred from electronic annotation with InterPro:IPR002225	-
Acidovorax temperans	3L_17047921_SNP	1.13e-06	XLOC_014598			601	3PRIME	+
Acidovorax temperans	3L_17053466_SNP	3.06e-07	FBgn0260943	Rbp6	RNA-binding protein 6	0	EXON	-	-	-	mRNA binding ; GO:0003729 | non-traceable author statement <newline> nucleic acid binding ; GO:0003676 | inferred from electronic annotation with InterPro:IPR000504 <newline> nucleotide binding ; GO:0000166 | inferred from electronic annotation with InterPro:IPR012677	Hsap\HNRNPA0 <newline> Hsap\DAZAP1 <newline> Hsap\HNRNPA2B1 <newline> Hsap\ENSG00000197451 <newline> Hsap\HNRNPD <newline> Hsap\MSI2 <newline> Hsap\HNRNPA1L2 <newline> Hsap\ENSG00000135486 <newline> Hsap\HNRNPA3 <newline> Hsap\HNRPDL <newline> Hsap\MSI1
Fimbriimonas ginsengisoli	X_6384337_SNP	2.07e-06	FBgn0259242	CG42340	CG42340	0	INTRON	-	potassium ion transmembrane transport ; GO:0071805 | inferred from electronic annotation with InterPro:IPR003280	membrane ; GO:0016020 | inferred from electronic annotation with InterPro:IPR003280	potassium channel activity ; GO:0005267 | inferred from sequence or structural similarity with SGD_LOCUS:TOK1; SGD:S0003629	-
Fimbriimonas ginsengisoli	X_6384487_SNP	6.5e-06	FBgn0259242	CG42340	CG42340	0	INTRON	-	potassium ion transmembrane transport ; GO:0071805 | inferred from electronic annotation with InterPro:IPR003280	membrane ; GO:0016020 | inferred from electronic annotation with InterPro:IPR003280	potassium channel activity ; GO:0005267 | inferred from sequence or structural similarity with SGD_LOCUS:TOK1; SGD:S0003629	-
Fimbriimonas ginsengisoli	X_6384949_SNP	4.38e-06	FBgn0259242	CG42340	CG42340	0	INTRON	-	potassium ion transmembrane transport ; GO:0071805 | inferred from electronic annotation with InterPro:IPR003280	membrane ; GO:0016020 | inferred from electronic annotation with InterPro:IPR003280	potassium channel activity ; GO:0005267 | inferred from sequence or structural similarity with SGD_LOCUS:TOK1; SGD:S0003629	-
Fimbriimonas ginsengisoli	X_8707913_SNP	9.88e-06	Intergenic
Fimbriimonas ginsengisoli	X_12486426_SNP	4.55e-06	FBgn0030403	CG1824	CG1824	162	3PRIME	-	transmembrane transport ; GO:0055085 | inferred from biological aspect of ancestor with PANTHER:PTN000657188	mitochondrial inner membrane ; GO:0005743 | inferred from sequence or structural similarity with UniProtKB:Q9NUT2 <newline> integral component of membrane ; GO:0016021 | inferred from biological aspect of ancestor with PANTHER:PTN000657188	ATPase activity, coupled to transmembrane movement of substances ; GO:0042626 | inferred from sequence or structural similarity with UniProtKB:Q9NUT2 <newline> transporter activity ; GO:0005215 | inferred from sequence or structural similarity with UniProtKB:Q9NUT2 <newline> ATP binding ; GO:0005524 | inferred from electronic annotation with InterPro:IPR001140, InterPro:IPR003439, InterPro:IPR011…	Hsap\ABCB9 <newline> Hsap\TAP1 <newline> Hsap\ABCB11 <newline> Hsap\ABCB10 <newline> Hsap\ABCB1 <newline> Hsap\ENSG00000004846 <newline> Hsap\ENSG00000197150 <newline> Hsap\ENSG00000005471 <newline> Hsap\ENSG00000250264
Fimbriimonas ginsengisoli	X_12486426_SNP	4.55e-06	FBgn0041203	LIMK1	LIM-kinase1	200	5PRIME	-	protein phosphorylation ; GO:0006468 | inferred from direct assay <newline> actin cytoskeleton organization ; GO:0030036 | non-traceable author statement <newline> protein phosphorylation ; GO:0006468 | non-traceable author statement <newline> regulation of axonogenesis ; GO:0050770 | inferred from mutant phenotype <newline> synaptic growth at neuromuscular junction ; GO:0051124 | inferred from m…	-	protein serine/threonine kinase activity ; GO:0004674 | inferred from sequence or structural similarity <newline> protein serine/threonine kinase activity ; GO:0004674 | inferred from direct assay <newline> protein serine/threonine kinase activity ; GO:0004674 | non-traceable author statement <newline> protein kinase activity ; GO:0004672 | non-traceable author statement <newline> protein serine/…	Hsap\LIMK1 <newline> Hsap\LIMK2
Fimbriimonas ginsengisoli	X_12486426_SNP	4.55e-06	XLOC_031862			480	5PRIME	-
Fimbriimonas ginsengisoli	X_14306698_SNP	8.77e-09	FBgn0052600	dpr8	dpr8	0	INTRON	+	sensory perception of chemical stimulus ; GO:0007606 | inferred from sequence or structural similarity with dpr	cellular_component ; GO:0005575 | no biological data available	molecular_function ; GO:0003674 | no biological data available	-
Fimbriimonas ginsengisoli	X_14306712_SNP	3.09e-06	FBgn0052600	dpr8	dpr8	0	INTRON	+	sensory perception of chemical stimulus ; GO:0007606 | inferred from sequence or structural similarity with dpr	cellular_component ; GO:0005575 | no biological data available	molecular_function ; GO:0003674 | no biological data available	-
Fimbriimonas ginsengisoli	X_17414775_SNP	4.63e-06	FBgn0263706	CG43658	CG43658	0	INTRON	-	imaginal disc-derived leg morphogenesis ; GO:0007480 | inferred from mutant phenotype <newline> regulation of Rho protein signal transduction ; GO:0035023 | inferred from electronic annotation with InterPro:IPR000219 <newline> positive regulation of Rho protein signal transduction ; GO:0035025 | inferred by curator from GO:0005089	cellular_component ; GO:0005575 | no biological data available	Rho guanyl-nucleotide exchange factor activity ; GO:0005089 | inferred from sequence or structural similarity with HGNC_gene:ARHGEF10; HGNC:14103	-
Fimbriimonas ginsengisoli	X_17414775_SNP	4.63e-06	Intergenic
Fimbriimonas ginsengisoli	X_17414777_SNP	4.62e-06	FBgn0263706	CG43658	CG43658	0	INTRON	-	imaginal disc-derived leg morphogenesis ; GO:0007480 | inferred from mutant phenotype <newline> regulation of Rho protein signal transduction ; GO:0035023 | inferred from electronic annotation with InterPro:IPR000219 <newline> positive regulation of Rho protein signal transduction ; GO:0035025 | inferred by curator from GO:0005089	cellular_component ; GO:0005575 | no biological data available	Rho guanyl-nucleotide exchange factor activity ; GO:0005089 | inferred from sequence or structural similarity with HGNC_gene:ARHGEF10; HGNC:14103	-
Fimbriimonas ginsengisoli	X_17414777_SNP	4.62e-06	Intergenic
Fimbriimonas ginsengisoli	X_17415125_SNP	5.89e-07	FBgn0263706	CG43658	CG43658	0	INTRON	-	imaginal disc-derived leg morphogenesis ; GO:0007480 | inferred from mutant phenotype <newline> regulation of Rho protein signal transduction ; GO:0035023 | inferred from electronic annotation with InterPro:IPR000219 <newline> positive regulation of Rho protein signal transduction ; GO:0035025 | inferred by curator from GO:0005089	cellular_component ; GO:0005575 | no biological data available	Rho guanyl-nucleotide exchange factor activity ; GO:0005089 | inferred from sequence or structural similarity with HGNC_gene:ARHGEF10; HGNC:14103	-
Fimbriimonas ginsengisoli	X_17415125_SNP	5.89e-07	Intergenic
Fimbriimonas ginsengisoli	2R_2743201_SNP	1.05e-06	Intergenic
Fimbriimonas ginsengisoli	2R_2743201_SNP	1.05e-06	Intergenic
Fimbriimonas ginsengisoli	2R_3864842_SNP	1.19e-06	FBgn0033246	ACC	Acetyl-CoA carboxylase	0	INTRON	-	cell morphogenesis ; GO:0000902 | inferred from mutant phenotype <newline> fatty acid biosynthetic process ; GO:0006633 | inferred from electronic annotation with InterPro:IPR013537	lipid particle ; GO:0005811 | inferred from direct assay <newline> cytoplasm ; GO:0005737 | inferred from direct assay	acetyl-CoA carboxylase activity ; GO:0003989 | inferred from sequence or structural similarity with EMBL:X68968 <newline> ATP binding ; GO:0005524 | inferred from electronic annotation with InterPro:IPR005479, InterPro:IPR011761, InterPro:IPR011764, InterPro:IPR013537, InterPro:IPR013815, InterPro:IPR013816, InterPro:IPR013817, InterPro:IPR016185 <newline> biotin carboxylase activity ; GO:0004075…	Hsap\ACACB <newline> Hsap\ENSG00000132142
Fimbriimonas ginsengisoli	2R_6822174_SNP	3.56e-07	Intergenic
Fimbriimonas ginsengisoli	2R_6822177_SNP	4.66e-07	Intergenic
Fimbriimonas ginsengisoli	2R_7964522_SNP	1.36e-06	FBgn0033679	CG8888	CG8888	0	INTRON	-	metabolic process ; GO:0008152 | inferred from electronic annotation with InterPro:IPR002198	-	oxidoreductase activity, acting on CH-OH group of donors ; GO:0016614 | inferred from sequence or structural similarity with EMBL:AF030513	Hsap\DHRS9 <newline> Hsap\HSD11B2 <newline> Hsap\HSD17B6 <newline> Hsap\BDH1 <newline> Hsap\RDH16 <newline> Hsap\SDR9C7
Fimbriimonas ginsengisoli	2R_7964522_SNP	1.36e-06	Intergenic
Fimbriimonas ginsengisoli	2R_7964522_SNP	1.36e-06	Intergenic
Fimbriimonas ginsengisoli	2R_12236293_SNP	5.22e-06	FBgn0034120	CG15710	CG15710	261	5PRIME	-	-	-	metal ion binding ; GO:0046872 | inferred from electronic annotation with InterPro:IPR007087	-
Fimbriimonas ginsengisoli	2R_20598677_SNP	8.15e-07	FBgn0053988	Mid1	Mid1 ortholog (S. cerevisiae)	0	INTRON	-	locomotor rhythm ; GO:0045475 | inferred from mutant phenotype <newline> social behavior ; GO:0035176 | inferred from mutant phenotype	cellular_component ; GO:0005575 | no biological data available	molecular_function ; GO:0003674 | no biological data available	-
Fimbriimonas ginsengisoli	2L_5889964_SNP	8.22e-07	Intergenic
Fimbriimonas ginsengisoli	2L_6596031_SNP	3.36e-06	FBgn0031835	CG11319	CG11319	0	INTRON	-	proteolysis ; GO:0006508 | inferred from electronic annotation with InterPro:IPR001375, InterPro:IPR002469	membrane ; GO:0016020 | inferred from electronic annotation with InterPro:IPR002469	dipeptidyl-peptidase activity ; GO:0008239 | inferred from sequence or structural similarity with UniProtKB:P46101 <newline> serine-type peptidase activity ; GO:0008236 | inferred from electronic annotation with InterPro:IPR001375	-
Fimbriimonas ginsengisoli	2L_6596031_SNP	3.36e-06	Intergenic
Fimbriimonas ginsengisoli	2L_6596031_SNP	3.36e-06	Intergenic
Fimbriimonas ginsengisoli	2L_6596031_SNP	3.36e-06	Intergenic
Fimbriimonas ginsengisoli	2L_6596031_SNP	3.36e-06	Intergenic
Fimbriimonas ginsengisoli	2L_9058126_SNP	5.88e-07	FBgn0051708	CG31708	CG31708	0	INTRON	-	-	-	-	-
Fimbriimonas ginsengisoli	2L_9611692_SNP	3.27e-06	FBgn0019809	gcm2	gcm2	0	EXON	+	glial cell differentiation ; GO:0010001 | inferred from genetic interaction with gcm AND inferred from mutant phenotype <newline> gliogenesis ; GO:0042063 | inferred from genetic interaction with gcm AND inferred from mutant phenotype <newline> crystal cell differentiation ; GO:0042688 | NOT inferred from mutant phenotype <newline> cell proliferation ; GO:0008283 | inferred from mutant phenotype …	nucleus ; GO:0005634 | non-traceable author statement	sequence-specific DNA binding transcription factor activity ; GO:0003700 | inferred from direct assay <newline> DNA binding ; GO:0003677 | inferred from sequence or structural similarity with gcm <newline> sequence-specific DNA binding transcription factor activity ; GO:0003700 | non-traceable author statement	Hsap\GCM1 <newline> Hsap\GCM2
Fimbriimonas ginsengisoli	2L_9611692_SNP	3.27e-06	Intergenic
Fimbriimonas ginsengisoli	2L_11139205_SNP	4.32e-06	FBgn0010197	Gyc32E	Guanyl cyclase at 32E	0	INTRON	-	cGMP biosynthetic process ; GO:0006182 | non-traceable author statement <newline> signal transduction ; GO:0007165 | inferred from sequence or structural similarity with UniProtKB:P18293 <newline> intracellular signal transduction ; GO:0035556 | inferred from electronic annotation with InterPro:IPR001054, InterPro:IPR018297 <newline> cyclic nucleotide biosynthetic process ; GO:0009190 | inferred …	plasma membrane ; GO:0005886 | inferred from sequence or structural similarity <newline> plasma membrane ; GO:0005886 | inferred from sequence or structural similarity with UniProtKB:P18293	guanylate cyclase activity ; GO:0004383 | non-traceable author statement <newline> receptor activity ; GO:0004872 | non-traceable author statement <newline> guanylate cyclase activity ; GO:0004383 | inferred from sequence or structural similarity with MGD:Npr1; MGI:MGI:97371 <newline> receptor activity ; GO:0004872 | inferred from sequence or structural similarity with UniProtKB:P18293 <newline> …	Hsap\NPR1 <newline> Hsap\NPR2
Fimbriimonas ginsengisoli	2L_11139205_SNP	4.32e-06	FBgn0040211	hgo	homogentisate 1,2-dioxygenase	640	3PRIME	+	L-phenylalanine catabolic process ; GO:0006559 | non-traceable author statement <newline> tyrosine catabolic process ; GO:0006572 | non-traceable author statement <newline> oxidation-reduction process ; GO:0055114 | inferred from electronic annotation with InterPro:IPR005708 <newline> L-phenylalanine catabolic process ; GO:0006559 | inferred from electronic annotation with InterPro:IPR005708 <new…	-	homogentisate 1,2-dioxygenase activity ; GO:0004411 | non-traceable author statement <newline> homogentisate 1,2-dioxygenase activity ; GO:0004411 | inferred from sequence or structural similarity with EMBL:U58988	Hsap\HGD
Fimbriimonas ginsengisoli	2L_11139226_SNP	6.93e-06	FBgn0010197	Gyc32E	Guanyl cyclase at 32E	0	INTRON	-	cGMP biosynthetic process ; GO:0006182 | non-traceable author statement <newline> signal transduction ; GO:0007165 | inferred from sequence or structural similarity with UniProtKB:P18293 <newline> intracellular signal transduction ; GO:0035556 | inferred from electronic annotation with InterPro:IPR001054, InterPro:IPR018297 <newline> cyclic nucleotide biosynthetic process ; GO:0009190 | inferred …	plasma membrane ; GO:0005886 | inferred from sequence or structural similarity <newline> plasma membrane ; GO:0005886 | inferred from sequence or structural similarity with UniProtKB:P18293	guanylate cyclase activity ; GO:0004383 | non-traceable author statement <newline> receptor activity ; GO:0004872 | non-traceable author statement <newline> guanylate cyclase activity ; GO:0004383 | inferred from sequence or structural similarity with MGD:Npr1; MGI:MGI:97371 <newline> receptor activity ; GO:0004872 | inferred from sequence or structural similarity with UniProtKB:P18293 <newline> …	Hsap\NPR1 <newline> Hsap\NPR2
Fimbriimonas ginsengisoli	2L_11139226_SNP	6.93e-06	FBgn0040211	hgo	homogentisate 1,2-dioxygenase	661	3PRIME	+	L-phenylalanine catabolic process ; GO:0006559 | non-traceable author statement <newline> tyrosine catabolic process ; GO:0006572 | non-traceable author statement <newline> oxidation-reduction process ; GO:0055114 | inferred from electronic annotation with InterPro:IPR005708 <newline> L-phenylalanine catabolic process ; GO:0006559 | inferred from electronic annotation with InterPro:IPR005708 <new…	-	homogentisate 1,2-dioxygenase activity ; GO:0004411 | non-traceable author statement <newline> homogentisate 1,2-dioxygenase activity ; GO:0004411 | inferred from sequence or structural similarity with EMBL:U58988	Hsap\HGD
Fimbriimonas ginsengisoli	2L_16049620_SNP	9.96e-06	FBgn0000182	BicC	Bicaudal C	863	3PRIME	+	ovarian follicle cell migration ; GO:0007297 | inferred from mutant phenotype <newline> negative regulation of oskar mRNA translation ; GO:0007319 | traceable author statement <newline> oogenesis ; GO:0048477 | inferred from mutant phenotype <newline> oogenesis ; GO:0048477 | non-traceable author statement <newline> oogenesis ; GO:0048477 | traceable author statement <newline> microtubule cytoske…	integral component of plasma membrane ; GO:0005887 | non-traceable author statement	mRNA binding ; GO:0003729 | traceable author statement <newline> mRNA binding ; GO:0003729 | non-traceable author statement <newline> mRNA binding ; GO:0003729 | inferred from sequence or structural similarity <newline> protein binding ; GO:0005515 | inferred from physical interaction with orb <newline> RNA binding ; GO:0003723 | inferred from electronic annotation with InterPro:IPR004087, InterP…	Hsap\BICC1
Fimbriimonas ginsengisoli	2L_16049620_SNP	9.96e-06	FBgn0013433	beat-Ia	beaten path Ia	345	5PRIME	+	defasciculation of motor neuron axon ; GO:0007415 | inferred from mutant phenotype <newline> Bolwig's organ morphogenesis ; GO:0001746 | inferred from mutant phenotype <newline> axon choice point recognition ; GO:0016198 | traceable author statement <newline> axon guidance ; GO:0007411 | inferred from genetic interaction with SoxN	extracellular region ; GO:0005576 | inferred from sequence or structural similarity	molecular_function ; GO:0003674 | no biological data available	Hsap\NUP35
Fimbriimonas ginsengisoli	2L_16049620_SNP	9.96e-06	FBgn0266459	CG45084	CG45084	863	3PRIME	+	-	-	-	-
Fimbriimonas ginsengisoli	2L_18333697_SNP	6.04e-06	FBgn0000636	Fas3	Fasciclin 3	0	INTRON	+	axon guidance ; GO:0007411 | inferred from expression pattern <newline> synaptic target recognition ; GO:0008039 | inferred from direct assay <newline> ovarian follicle cell development ; GO:0030707 | traceable author statement <newline> axonal fasciculation ; GO:0007413 | traceable author statement <newline> homophilic cell adhesion ; GO:0007156 | traceable author statement <newline> synaptic ta…	lateral plasma membrane ; GO:0016328 | traceable author statement <newline> septate junction ; GO:0005918 | traceable author statement <newline> basolateral plasma membrane ; GO:0016323 | non-traceable author statement <newline> plasma membrane ; GO:0005886 | traceable author statement <newline> integral component of membrane ; GO:0016021 | non-traceable author statement <newline> plasma membrane…	-	-
Fimbriimonas ginsengisoli	2L_18477428_SNP	4.36e-06	FBgn0032681	CG10283	CG10283	0	INTRON	-	-	-	-	Hsap\CCDC50
Fimbriimonas ginsengisoli	2L_18477428_SNP	4.36e-06	Intergenic
Fimbriimonas ginsengisoli	2L_18477428_SNP	4.36e-06	Intergenic
Fimbriimonas ginsengisoli	2L_18477428_SNP	4.36e-06	Intergenic
Fimbriimonas ginsengisoli	2L_18564827_SNP	5.54e-06	FBgn0085370	Pde11	Phosphodiesterase 11	0	INTRON	-	cAMP metabolic process ; GO:0046058 | inferred from direct assay <newline> cGMP metabolic process ; GO:0046068 | inferred from direct assay <newline> lateral inhibition ; GO:0046331 | inferred from mutant phenotype <newline> signal transduction ; GO:0007165 | inferred from electronic annotation with InterPro:IPR002073	cellular_component ; GO:0005575 | no biological data available	3',5'-cyclic-AMP phosphodiesterase activity ; GO:0004115 | inferred from sequence or structural similarity with HGNC_gene:PDE11A; HGNC:8773; OMIM:604961 <newline> 3',5'-cyclic-GMP phosphodiesterase activity ; GO:0047555 | inferred from sequence or structural similarity with HGNC_gene:PDE11A; HGNC:8773; OMIM:604961 <newline> 3',5'-cyclic-AMP phosphodiesterase activity ; GO:0004115 | inferred from …	Hsap\PDE11A <newline> Hsap\PDE5A
Fimbriimonas ginsengisoli	2L_19197474_SNP	4.92e-06	FBgn0015380	drl	derailed	0	INTRON	+	axon guidance ; GO:0007411 | inferred from mutant phenotype <newline> signal transduction ; GO:0007165 | inferred from mutant phenotype <newline> learning or memory ; GO:0007611 | inferred from mutant phenotype <newline> muscle attachment ; GO:0016203 | inferred from mutant phenotype <newline> protein phosphorylation ; GO:0006468 | non-traceable author statement <newline> olfactory learning ; GO:…	plasma membrane ; GO:0005886 | inferred from sequence or structural similarity <newline> axon ; GO:0030424 | inferred from direct assay	transmembrane receptor protein tyrosine kinase activity ; GO:0004714 | inferred from sequence or structural similarity <newline> protein tyrosine kinase activity ; GO:0004713 | non-traceable author statement <newline> transmembrane receptor protein tyrosine kinase activity ; GO:0004714 | non-traceable author statement <newline> Wnt-protein binding ; GO:0017147 | inferred from physical interaction…	Hsap\ENSG00000163785
Fimbriimonas ginsengisoli	2L_22430329_SNP	1.25e-06	FBgn0040009	CG17490	CG17490	71	5PRIME	+	-	-	-	-
Fimbriimonas ginsengisoli	2L_22430329_SNP	1.25e-06	FBgn0064225	RpL5	Ribosomal protein L5	713	5PRIME	-	translation ; GO:0006412 | inferred from sequence or structural similarity <newline> translation ; GO:0006412 | inferred from electronic annotation with InterPro:IPR005484, InterPro:IPR005485	cytosolic large ribosomal subunit ; GO:0022625 | non-traceable author statement <newline> cytosolic large ribosomal subunit ; GO:0022625 | inferred from sequence or structural similarity with MGD:Rpl5; MGI:MGI:102854 <newline> ribosome ; GO:0005840 | inferred from direct assay	structural constituent of ribosome ; GO:0003735 | inferred from sequence or structural similarity <newline> 5S rRNA binding ; GO:0008097 | non-traceable author statement <newline> protein binding ; GO:0005515 | inferred from physical interaction with Fmr1 <newline> structural constituent of ribosome ; GO:0003735 | non-traceable author statement <newline> structural constituent of ribosome ; GO:00…	Hsap\RPL5
Fimbriimonas ginsengisoli	3R_8281139_SNP	4.81e-07	FBgn0038053	CG18549	CG18549	0	EXON	+	-	-	-	Hsap\MFSD11
Fimbriimonas ginsengisoli	3R_16383397_SNP	5.35e-06	FBgn0043457	CG5180	CG5180	255	5PRIME	+	-	-	-	-
Fimbriimonas ginsengisoli	3R_16383397_SNP	5.35e-06	FBgn0067783	att-ORFA	alternative testis transcripts open reading frame A	8	5PRIME	-	defense response to Gram-negative bacterium ; GO:0050829 | inferred from mutant phenotype <newline> positive regulation of innate immune response ; GO:0045089 | inferred from mutant phenotype <newline> transmembrane transport ; GO:0055085 | inferred from electronic annotation with InterPro:IPR002067	mitochondrial envelope ; GO:0005740 | inferred from sequence or structural similarity with UniProtKB:P38702 <newline> mitochondrial envelope ; GO:0005740 | inferred from sequence or structural similarity <newline> integral component of membrane ; GO:0016021 | inferred from sequence model <newline> mitochondrial inner membrane ; GO:0005743 | inferred from electronic annotation with InterPro:IPR002…	transmembrane transporter activity ; GO:0022857 | inferred from sequence or structural similarity with UniProtKB:P38702 <newline> transmembrane transporter activity ; GO:0022857 | inferred from sequence or structural similarity	Hsap\SLC25A42
Fimbriimonas ginsengisoli	3R_22757229_SNP	9.63e-06	FBgn0015541	sda	slamdance	0	INTRON	+	mechanosensory behavior ; GO:0007638 | inferred from mutant phenotype <newline> response to mechanical stimulus ; GO:0009612 | inferred from mutant phenotype <newline> response to mechanical stimulus ; GO:0009612 | inferred from genetic interaction with kcc <newline> regulation of membrane potential ; GO:0042391 | inferred from mutant phenotype <newline> proteolysis ; GO:0006508 | inferred from e…	-	aminopeptidase activity ; GO:0004177 | inferred from sequence or structural similarity with UniProtKB:P15541 <newline> metallopeptidase activity ; GO:0008237 | inferred from electronic annotation with InterPro:IPR014782 <newline> zinc ion binding ; GO:0008270 | inferred from electronic annotation with InterPro:IPR014782	Hsap\ENSG00000164307 <newline> Hsap\ENPEP <newline> Hsap\TRHDE <newline> Hsap\NPEPPS <newline> Hsap\ENSG00000172901 <newline> Hsap\ERAP2 <newline> Hsap\LNPEP <newline> Hsap\ANPEP
Fimbriimonas ginsengisoli	3R_22757229_SNP	9.63e-06	Intergenic
Fimbriimonas ginsengisoli	3R_24720433_SNP	9.49e-06	FBgn0265998	Doa	Darkener of apricot	0	EXON	+	central nervous system development ; GO:0007417 | non-traceable author statement <newline> chitin-based embryonic cuticle biosynthetic process ; GO:0008362 | non-traceable author statement <newline> photoreceptor cell maintenance ; GO:0045494 | non-traceable author statement <newline> negative regulation of male germ cell proliferation ; GO:2000255 | inferred from mutant phenotype <newline> sex d…	nucleus ; GO:0005634 | non-traceable author statement <newline> cytoplasm ; GO:0005737 | inferred from direct assay <newline> nucleus ; GO:0005634 | inferred from direct assay <newline> endoplasmic reticulum ; GO:0005783 | inferred from direct assay <newline> nucleus ; GO:0005634 | inferred by curator from GO:0000381 <newline> microtubule associated complex ; GO:0005875 | inferred from direct ass…	protein serine/threonine kinase activity ; GO:0004674 | inferred from direct assay <newline> protein kinase activity ; GO:0004672 | inferred from sequence or structural similarity with NCBI_NP:003984 <newline> protein serine/threonine kinase activity ; GO:0004674 | non-traceable author statement <newline> protein serine/threonine/tyrosine kinase activity ; GO:0004712 | non-traceable author statem…	Hsap\CLK1 <newline> Hsap\ENSG00000176444 <newline> Hsap\CLK4 <newline> Hsap\CLK3
Fimbriimonas ginsengisoli	3L_8006403_SNP	8.92e-06	FBgn0011817	nmo	nemo	0	INTRON	+	ommatidial rotation ; GO:0016318 | inferred from genetic interaction with fz <newline> protein phosphorylation ; GO:0006468 | non-traceable author statement <newline> imaginal disc-derived wing morphogenesis ; GO:0007476 | inferred from mutant phenotype <newline> imaginal disc-derived wing vein specification ; GO:0007474 | inferred from mutant phenotype <newline> ommatidial rotation ; GO:0016318 …	-	protein serine/threonine kinase activity ; GO:0004674 | inferred from sequence or structural similarity <newline> protein serine/threonine kinase activity ; GO:0004674 | non-traceable author statement <newline> protein serine/threonine kinase activity ; GO:0004674 | inferred from sequence or structural similarity with EMBL:AF036332 <newline> protein kinase activity ; GO:0004672 | inferred from di…	Hsap\NLK
Fimbriimonas ginsengisoli	3L_8006403_SNP	8.92e-06	Intergenic
Fimbriimonas ginsengisoli	3L_12780140_SNP	5.18e-06	FBgn0260945	Atg1	Autophagy-specific gene 1	0	INTRON	-	regulation of autophagy ; GO:0010506 | inferred from mutant phenotype <newline> protein phosphorylation ; GO:0006468 | non-traceable author statement <newline> autophagy ; GO:0006914 | inferred from mutant phenotype <newline> synapse organization ; GO:0050808 | inferred from mutant phenotype <newline> synaptic growth at neuromuscular junction ; GO:0051124 | inferred from mutant phenotype <newline…	Atg1p signaling complex ; GO:0034273 | inferred from direct assay	protein kinase activity ; GO:0004672 | non-traceable author statement <newline> protein serine/threonine kinase activity ; GO:0004674 | inferred from sequence or structural similarity with UniProtKB:Q23023 <newline> kinesin binding ; GO:0019894 | inferred from mutant phenotype <newline> protein kinase activity ; GO:0004672 | inferred from sequence or structural similarity with WB:unc-51; WP:CE245…	-
Fimbriimonas ginsengisoli	3L_18152663_SNP	1.23e-06	FBgn0036781	CG13699	CG13699	0	EXON	-	-	-	-	-
Fimbriimonas ginsengisoli	3L_18152663_SNP	1.23e-06	Intergenic
Fimbriimonas ginsengisoli	3L_20317656_SNP	4.55e-06	Intergenic
Agrobacterium tumefaciens	X_15268523_SNP	7e-06	FBgn0000028	acj6	abnormal chemosensory jump 6	0	INTRON	-	synaptic target recognition ; GO:0008039 | inferred from mutant phenotype <newline> dendrite morphogenesis ; GO:0048813 | inferred from mutant phenotype <newline> dendrite morphogenesis ; GO:0048813 | traceable author statement <newline> axon guidance ; GO:0007411 | inferred from mutant phenotype <newline> dendrite guidance ; GO:0070983 | inferred from mutant phenotype <newline> chemosensory jump…	nucleus ; GO:0005634 | inferred from sequence or structural similarity with WB:unc-86; WP:CE00099 <newline> nucleus ; GO:0005634 | non-traceable author statement	protein serine/threonine phosphatase activity ; GO:0004722 | inferred from sequence or structural similarity with EMBL:U53276 <newline> transcription corepressor activity ; GO:0003714 | inferred from genetic interaction with vvl inferred from physical interaction with vvl <newline> sequence-specific DNA binding transcription factor activity ; GO:0003700 | inferred from direct assay <newline> sequ…	Hsap\POU4F2 <newline> Hsap\POU4F1 <newline> Hsap\POU4F3
Agrobacterium tumefaciens	X_16938744_SNP	1.58e-06	FBgn0266354	CG45002	CG45002	0	INTRON	-	proteolysis ; GO:0006508 | inferred from electronic annotation with InterPro:IPR001375, InterPro:IPR002469	membrane ; GO:0016020 | inferred from electronic annotation with InterPro:IPR002469	dipeptidyl-peptidase activity ; GO:0008239 | inferred from sequence or structural similarity with EMBL:AF092507 <newline> serine-type peptidase activity ; GO:0008236 | inferred from electronic annotation with InterPro:IPR001375	-
Agrobacterium tumefaciens	X_16938744_SNP	1.58e-06	XLOC_032300			148	5PRIME	-
Agrobacterium tumefaciens	2R_12987466_SNP	5e-06	FBgn0010226	GstS1	Glutathione S transferase S1	460	5PRIME	-	response to oxidative stress ; GO:0006979 | non-traceable author statement <newline> glutathione metabolic process ; GO:0006749 | inferred from direct assay	cytoplasm ; GO:0005737 | inferred from sequence or structural similarity with RGD:Gsto1; RGD:70952	glutathione transferase activity ; GO:0004364 | non-traceable author statement <newline> glutathione peroxidase activity ; GO:0004602 | inferred from direct assay <newline> glutathione transferase activity ; GO:0004364 | inferred from direct assay <newline> glutathione transferase activity ; GO:0004364 | inferred from sequence or structural similarity with UniProtKB:P46437	Hsap\HPGDS
Agrobacterium tumefaciens	2R_12987466_SNP	5e-06	FBgn0050456	CG30456	CG30456	280	5PRIME	+	imaginal disc-derived leg morphogenesis ; GO:0007480 | inferred from mutant phenotype <newline> positive regulation of Rho protein signal transduction ; GO:0035025 | inferred from sequence or structural similarity with trio	cellular_component ; GO:0005575 | no biological data available	Rho guanyl-nucleotide exchange factor activity ; GO:0005089 | inferred from sequence or structural similarity with trio	-
Agrobacterium tumefaciens	2R_14475417_SNP	7.87e-06	FBgn0050115	GEFmeso	Guanine nucleotide exchange factor in mesoderm	0	INTRON	-	imaginal disc-derived leg morphogenesis ; GO:0007480 | inferred from mutant phenotype <newline> imaginal disc-derived wing vein specification ; GO:0007474 | inferred from mutant phenotype <newline> regulation of Cdc42 protein signal transduction ; GO:0032489 | inferred from physical interaction with Cdc42	cellular_component ; GO:0005575 | no biological data available	guanyl-nucleotide exchange factor activity ; GO:0005085 | inferred from sequence or structural similarity with EMBL:AF091395 <newline> Ral GTPase binding ; GO:0017160 | inferred from direct assay <newline> Rho guanyl-nucleotide exchange factor activity ; GO:0005089 | inferred from physical interaction with Cdc42	Hsap\PLEKHG2 <newline> Hsap\PLEKHG3 <newline> Hsap\PLEKHG1
Agrobacterium tumefaciens	2R_14475417_SNP	7.87e-06	Intergenic
Agrobacterium tumefaciens	2R_15993236_SNP	5.86e-06	Intergenic
Agrobacterium tumefaciens	2R_15993236_SNP	5.86e-06	Intergenic
Agrobacterium tumefaciens	2R_19110757_SNP	1.66e-07	Intergenic
Agrobacterium tumefaciens	2R_19201871_SNP	3.94e-06	FBgn0263084	HP1Lcsd	Heterochromatin Protein 1L chromoshadow domain	494	5PRIME	-	chromosome organization ; GO:0051276 | inferred from sequence or structural similarity with Su(var)205	chromatin ; GO:0000785 | inferred from sequence or structural similarity with Su(var)205	chromatin binding ; GO:0003682 | inferred from sequence or structural similarity with Su(var)205	-
Agrobacterium tumefaciens	2L_8801327_SNP	9.29e-06	Intergenic
Agrobacterium tumefaciens	3R_9139696_SNP	3.3e-06	FBgn0264991	CG44142	CG44142	786	5PRIME	-	-	-	-	-
Agrobacterium tumefaciens	3R_17194701_SNP	1.04e-06	FBgn0002781	mod(mdg4)	modifier of mdg4	0	EXON	.	regulation of chromatin assembly or disassembly ; GO:0001672 | inferred from mutant phenotype <newline> chromatin organization ; GO:0006325 | non-traceable author statement <newline> germ cell migration ; GO:0008354 | inferred from genetic interaction with wun2 AND inferred from mutant phenotype <newline> oogenesis ; GO:0048477 | inferred from mutant phenotype <newline> male meiosis I ; GO:000714…	chromatin ; GO:0000785 | inferred from mutant phenotype <newline> nucleus ; GO:0005634 | non-traceable author statement <newline> nucleus ; GO:0005634 | inferred from direct assay <newline> polytene chromosome ; GO:0005700 | inferred from direct assay <newline> plasma membrane ; GO:0005886 | inferred from sequence or structural similarity <newline> nucleolus ; GO:0005730 | colocalizes_with inferr…	protein binding ; GO:0005515 | inferred from physical interaction with su(Hw) <newline> chromatin binding ; GO:0003682 | inferred from mutant phenotype <newline> phosphatidate phosphatase activity ; GO:0008195 | inferred from sequence or structural similarity <newline> protein binding ; GO:0005515 | inferred from physical interaction with UniProtKB:Q24478 <newline> POZ domain binding ; GO:0031208…	-
Agrobacterium tumefaciens	3R_17194701_SNP	1.04e-06	FBgn0261840	pre-mod(mdg4)-X	pre-mod(mdg4)-X	0	EXON	+	-	-	-	-
Agrobacterium tumefaciens	3R_17194701_SNP	1.04e-06	FBgn0261841	pre-mod(mdg4)-AD	pre-mod(mdg4)-AD	700	3PRIME	+	-	-	-	-
Agrobacterium tumefaciens	3R_17194701_SNP	1.04e-06	FBgn0261842	pre-mod(mdg4)-AE	pre-mod(mdg4)-AE	700	3PRIME	+	-	-	-	-
Agrobacterium tumefaciens	3R_17194701_SNP	1.04e-06	FBgn0261843	pre-mod(mdg4)-W	pre-mod(mdg4)-W	700	3PRIME	+	-	-	-	-
Agrobacterium tumefaciens	3R_17194701_SNP	1.04e-06	FBgn0261844	pre-mod(mdg4)-V	pre-mod(mdg4)-V	0	EXON	+	-	-	-	-
Agrobacterium tumefaciens	3R_17194701_SNP	1.04e-06	FBgn0261845	pre-mod(mdg4)-U	pre-mod(mdg4)-U	0	EXON	+	-	-	-	-
Agrobacterium tumefaciens	3R_21017812_SNP	5.81e-06	FBgn0039286	dan	distal antenna	0	EXON	+	regulation of transcription, DNA-templated ; GO:0006355 | inferred from mutant phenotype <newline> segment specification ; GO:0007379 | inferred from mutant phenotype <newline> compound eye development ; GO:0048749 | inferred from mutant phenotype <newline> central nervous system formation ; GO:0021556 | inferred from mutant phenotype	nucleus ; GO:0005634 | inferred from direct assay	DNA binding ; GO:0003677 | non-traceable author statement <newline> protein binding ; GO:0005515 | inferred from physical interaction with UniProtKB:O18381 inferred from physical interaction with UniProtKB:Q24027 <newline> sequence-specific DNA binding transcription factor activity ; GO:0003700 | inferred from mutant phenotype <newline> DNA binding ; GO:0003677 | inferred from electronic annotati…	-
Agrobacterium tumefaciens	3R_21017812_SNP	5.81e-06	FBgn0083946	lobo	lost boys	0	INTRON	-	sperm motility ; GO:0030317 | inferred from mutant phenotype <newline> sperm storage ; GO:0046693 | inferred from mutant phenotype	motile cilium ; GO:0031514 | inferred from direct assay	molecular_function ; GO:0003674 | no biological data available	Hsap\CCDC135
Agrobacterium tumefaciens	3L_2760528_SNP	2.91e-06	FBgn0052296	Mrtf	Myocardin-related transcription factor	0	INTRON	-	positive regulation of transcription, DNA-templated ; GO:0045893 | non-traceable author statement <newline> actin cytoskeleton organization ; GO:0030036 | inferred from mutant phenotype <newline> border follicle cell migration ; GO:0007298 | inferred from mutant phenotype <newline> mesodermal cell migration ; GO:0008078 | inferred from mutant phenotype <newline> open tracheal system development ;…	cytoplasm ; GO:0005737 | inferred from direct assay <newline> nucleus ; GO:0005634 | inferred from direct assay	RNA polymerase II transcription coactivator activity ; GO:0001105 | inferred from direct assay <newline> activating transcription factor binding ; GO:0033613 | inferred from physical interaction with bs <newline> RNA polymerase II core promoter proximal region sequence-specific DNA binding transcription factor activity involved in positive regulation of transcription ; GO:0001077 | contributes_to…	-
Agrobacterium tumefaciens	3L_6802681_SNP	7.68e-06	Intergenic
Agrobacterium tumefaciens	3L_6802681_SNP	7.68e-06	Intergenic
Agrobacterium tumefaciens	3L_13621644_SNP	5.47e-07	FBgn0264001	bru-3	bruno-3	0	INTRON	-	negative regulation of translation ; GO:0017148 | inferred from sequence alignment with aret	protein complex ; GO:0043234 | inferred from direct assay	nucleotide binding ; GO:0000166 | inferred from electronic annotation with InterPro:IPR012677 <newline> mRNA binding ; GO:0003729 | inferred from sequence or structural similarity <newline> mRNA binding ; GO:0003729 | inferred from sequence or structural similarity with EMBL:U16800 <newline> RNA binding ; GO:0003723 | inferred from direct assay <newline> protein homodimerization activity ; GO:004…	Hsap\CELF1 <newline> Hsap\CELF6 <newline> Hsap\TNRC4 <newline> Hsap\CELF4 <newline> Hsap\CELF5 <newline> Hsap\ENSG00000048740
Agrobacterium tumefaciens	3L_13621644_SNP	5.47e-07	Intergenic
Agrobacterium tumefaciens	3L_16019583_SNP	8.29e-07	FBgn0044028	Notum	Notum	0	INTRON	+	GPI anchor release ; GO:0006507 | inferred from mutant phenotype <newline> negative regulation of Wnt signaling pathway ; GO:0030178 | non-traceable author statement <newline> Wnt signaling pathway ; GO:0016055 | inferred from mutant phenotype <newline> Wnt signaling pathway ; GO:0016055 | non-traceable author statement <newline> proteoglycan metabolic process ; GO:0006029 | non-traceable author …	extracellular space ; GO:0005615 | inferred from direct assay	deacetylase activity ; GO:0019213 | NOT inferred from direct assay	Hsap\NOTUM
Agrobacterium tumefaciens	3L_16019583_SNP	8.29e-07	Intergenic
Agrobacterium tumefaciens	3L_16020227_SNP	6.68e-06	FBgn0044028	Notum	Notum	0	INTRON	+	GPI anchor release ; GO:0006507 | inferred from mutant phenotype <newline> negative regulation of Wnt signaling pathway ; GO:0030178 | non-traceable author statement <newline> Wnt signaling pathway ; GO:0016055 | inferred from mutant phenotype <newline> Wnt signaling pathway ; GO:0016055 | non-traceable author statement <newline> proteoglycan metabolic process ; GO:0006029 | non-traceable author …	extracellular space ; GO:0005615 | inferred from direct assay	deacetylase activity ; GO:0019213 | NOT inferred from direct assay	Hsap\NOTUM
Agrobacterium tumefaciens	3L_16020227_SNP	6.68e-06	Intergenic
Agrobacterium tumefaciens	3L_21724448_SNP	7.77e-06	FBgn0037122	CG14570	CG14570	894	5PRIME	-	-	-	-	-
Agrobacterium tumefaciens	3L_21724448_SNP	7.77e-06	FBgn0037123	CG14569	CG14569	0	EXON	-	-	-	-	-
Agrobacterium tumefaciens	3L_21730330_SNP	9.79e-06	FBgn0037126	CG14567	CG14567	476	3PRIME	-	-	-	-	-
Agrobacterium tumefaciens	3L_21735477_SNP	9.27e-06	FBgn0037128	CG14572	CG14572	0	EXON	+	-	-	-	-
Agrobacterium tumefaciens	3L_21735477_SNP	9.27e-06	FBgn0037129	CG14565	CG14565	871	3PRIME	-	-	-	-	-
Agrobacterium tumefaciens	3L_21735477_SNP	9.27e-06	Intergenic
Agrobacterium tumefaciens	3L_21741652_SNP	9.77e-06	FBgn0037130	Syn1	Syntrophin-like 1	0	INTRON	-	regulation of synaptic growth at neuromuscular junction ; GO:0008582 | inferred from genetic interaction with Nsf2	syntrophin complex ; GO:0016013 | inferred from sequence or structural similarity with HGNC_gene:SNTA1; HGNC:11167; OMIM:601017 AND inferred from sequence or structural similarity with HGNC_gene:SNTB1; HGNC:11168; OMIM:600026 AND inferred from sequence or structural similarity with HGNC_gene:SNTB2; HGNC:11169; OMIM:600027 <newline> syntrophin complex ; GO:0016013 | non-traceable author statement …	structural constituent of muscle ; GO:0008307 | inferred from sequence or structural similarity with HGNC_gene:SNTA1; HGNC:11167; OMIM:601017 AND inferred from sequence or structural similarity with HGNC_gene:SNTB1; HGNC:11168; OMIM:600026 AND inferred from sequence or structural similarity with HGNC_gene:SNTB2; HGNC:11169; OMIM:600027 <newline> cytoskeletal protein binding ; GO:0008092 | inferre…	Hsap\SNTB1 <newline> Hsap\SNTB2 <newline> Hsap\SNTA1
Agrobacterium tumefaciens	3L_21741675_SNP	1.69e-06	FBgn0037130	Syn1	Syntrophin-like 1	0	INTRON	-	regulation of synaptic growth at neuromuscular junction ; GO:0008582 | inferred from genetic interaction with Nsf2	syntrophin complex ; GO:0016013 | inferred from sequence or structural similarity with HGNC_gene:SNTA1; HGNC:11167; OMIM:601017 AND inferred from sequence or structural similarity with HGNC_gene:SNTB1; HGNC:11168; OMIM:600026 AND inferred from sequence or structural similarity with HGNC_gene:SNTB2; HGNC:11169; OMIM:600027 <newline> syntrophin complex ; GO:0016013 | non-traceable author statement …	structural constituent of muscle ; GO:0008307 | inferred from sequence or structural similarity with HGNC_gene:SNTA1; HGNC:11167; OMIM:601017 AND inferred from sequence or structural similarity with HGNC_gene:SNTB1; HGNC:11168; OMIM:600026 AND inferred from sequence or structural similarity with HGNC_gene:SNTB2; HGNC:11169; OMIM:600027 <newline> cytoskeletal protein binding ; GO:0008092 | inferre…	Hsap\SNTB1 <newline> Hsap\SNTB2 <newline> Hsap\SNTA1
Agrobacterium tumefaciens	3L_21751597_SNP	2.47e-06	FBgn0037130	Syn1	Syntrophin-like 1	0	INTRON	-	regulation of synaptic growth at neuromuscular junction ; GO:0008582 | inferred from genetic interaction with Nsf2	syntrophin complex ; GO:0016013 | inferred from sequence or structural similarity with HGNC_gene:SNTA1; HGNC:11167; OMIM:601017 AND inferred from sequence or structural similarity with HGNC_gene:SNTB1; HGNC:11168; OMIM:600026 AND inferred from sequence or structural similarity with HGNC_gene:SNTB2; HGNC:11169; OMIM:600027 <newline> syntrophin complex ; GO:0016013 | non-traceable author statement …	structural constituent of muscle ; GO:0008307 | inferred from sequence or structural similarity with HGNC_gene:SNTA1; HGNC:11167; OMIM:601017 AND inferred from sequence or structural similarity with HGNC_gene:SNTB1; HGNC:11168; OMIM:600026 AND inferred from sequence or structural similarity with HGNC_gene:SNTB2; HGNC:11169; OMIM:600027 <newline> cytoskeletal protein binding ; GO:0008092 | inferre…	Hsap\SNTB1 <newline> Hsap\SNTB2 <newline> Hsap\SNTA1
Agrobacterium tumefaciens	3L_21751597_SNP	2.47e-06	FBgn0037131	CG14564	CG14564	451	3PRIME	+	-	-	-	-
Agrobacterium tumefaciens	3L_21751597_SNP	2.47e-06	Intergenic
Corynebacterium terpenotabidum	X_901651_INS	3.66e-07	Intergenic
Corynebacterium terpenotabidum	X_8553726_DEL	7.35e-07	Intergenic
Corynebacterium terpenotabidum	X_11681749_SNP	1.77e-07	FBgn0030334	Karl	Karl	0	EXON	+	imaginal disc-derived wing morphogenesis ; GO:0007476 | inferred from mutant phenotype	cellular_component ; GO:0005575 | no biological data available	molecular_function ; GO:0003674 | no biological data available	-
Corynebacterium terpenotabidum	X_14785348_SNP	2.49e-06	FBgn0030592	CG9514	CG9514	0	INTRON	-	oxidation-reduction process ; GO:0055114 | inferred from electronic annotation with InterPro:IPR000172, InterPro:IPR007867 <newline> ecdysteroid metabolic process ; GO:0045455 | inferred from genomic context with Eo inferred from sequence or structural similarity with Eo	-	choline dehydrogenase activity ; GO:0008812 | inferred from sequence or structural similarity with EMBL:Z66494; protein_id:CAA91263 <newline> flavin adenine dinucleotide binding ; GO:0050660 | inferred from electronic annotation with InterPro:IPR000172 <newline> oxidoreductase activity ; GO:0016491 | inferred from sequence or structural similarity with Eo	-
Corynebacterium terpenotabidum	X_14785348_SNP	2.49e-06	FBgn0264078	Flo2	Flotillin 2	0	INTRON	+	cell adhesion ; GO:0007155 | non-traceable author statement <newline> melanotic encapsulation of foreign target ; GO:0035011 | inferred from mutant phenotype	flotillin complex ; GO:0016600 | non-traceable author statement <newline> plasma membrane ; GO:0005886 | inferred from direct assay	structural molecule activity ; GO:0005198 | non-traceable author statement	Hsap\FLOT2 <newline> Hsap\FLOT1
Corynebacterium terpenotabidum	X_14786524_SNP	8.93e-06	FBgn0030592	CG9514	CG9514	0	INTRON	-	oxidation-reduction process ; GO:0055114 | inferred from electronic annotation with InterPro:IPR000172, InterPro:IPR007867 <newline> ecdysteroid metabolic process ; GO:0045455 | inferred from genomic context with Eo inferred from sequence or structural similarity with Eo	-	choline dehydrogenase activity ; GO:0008812 | inferred from sequence or structural similarity with EMBL:Z66494; protein_id:CAA91263 <newline> flavin adenine dinucleotide binding ; GO:0050660 | inferred from electronic annotation with InterPro:IPR000172 <newline> oxidoreductase activity ; GO:0016491 | inferred from sequence or structural similarity with Eo	-
Corynebacterium terpenotabidum	X_14786524_SNP	8.93e-06	FBgn0264078	Flo2	Flotillin 2	0	INTRON	+	cell adhesion ; GO:0007155 | non-traceable author statement <newline> melanotic encapsulation of foreign target ; GO:0035011 | inferred from mutant phenotype	flotillin complex ; GO:0016600 | non-traceable author statement <newline> plasma membrane ; GO:0005886 | inferred from direct assay	structural molecule activity ; GO:0005198 | non-traceable author statement	Hsap\FLOT2 <newline> Hsap\FLOT1
Corynebacterium terpenotabidum	X_14786577_SNP	8.39e-06	FBgn0030592	CG9514	CG9514	0	INTRON	-	oxidation-reduction process ; GO:0055114 | inferred from electronic annotation with InterPro:IPR000172, InterPro:IPR007867 <newline> ecdysteroid metabolic process ; GO:0045455 | inferred from genomic context with Eo inferred from sequence or structural similarity with Eo	-	choline dehydrogenase activity ; GO:0008812 | inferred from sequence or structural similarity with EMBL:Z66494; protein_id:CAA91263 <newline> flavin adenine dinucleotide binding ; GO:0050660 | inferred from electronic annotation with InterPro:IPR000172 <newline> oxidoreductase activity ; GO:0016491 | inferred from sequence or structural similarity with Eo	-
Corynebacterium terpenotabidum	X_14786577_SNP	8.39e-06	FBgn0264078	Flo2	Flotillin 2	0	INTRON	+	cell adhesion ; GO:0007155 | non-traceable author statement <newline> melanotic encapsulation of foreign target ; GO:0035011 | inferred from mutant phenotype	flotillin complex ; GO:0016600 | non-traceable author statement <newline> plasma membrane ; GO:0005886 | inferred from direct assay	structural molecule activity ; GO:0005198 | non-traceable author statement	Hsap\FLOT2 <newline> Hsap\FLOT1
Corynebacterium terpenotabidum	X_14787606_SNP	4.03e-06	FBgn0030592	CG9514	CG9514	0	INTRON	-	oxidation-reduction process ; GO:0055114 | inferred from electronic annotation with InterPro:IPR000172, InterPro:IPR007867 <newline> ecdysteroid metabolic process ; GO:0045455 | inferred from genomic context with Eo inferred from sequence or structural similarity with Eo	-	choline dehydrogenase activity ; GO:0008812 | inferred from sequence or structural similarity with EMBL:Z66494; protein_id:CAA91263 <newline> flavin adenine dinucleotide binding ; GO:0050660 | inferred from electronic annotation with InterPro:IPR000172 <newline> oxidoreductase activity ; GO:0016491 | inferred from sequence or structural similarity with Eo	-
Corynebacterium terpenotabidum	X_14787606_SNP	4.03e-06	FBgn0264078	Flo2	Flotillin 2	0	INTRON	+	cell adhesion ; GO:0007155 | non-traceable author statement <newline> melanotic encapsulation of foreign target ; GO:0035011 | inferred from mutant phenotype	flotillin complex ; GO:0016600 | non-traceable author statement <newline> plasma membrane ; GO:0005886 | inferred from direct assay	structural molecule activity ; GO:0005198 | non-traceable author statement	Hsap\FLOT2 <newline> Hsap\FLOT1
Corynebacterium terpenotabidum	X_14787656_SNP	4.91e-06	FBgn0030592	CG9514	CG9514	0	INTRON	-	oxidation-reduction process ; GO:0055114 | inferred from electronic annotation with InterPro:IPR000172, InterPro:IPR007867 <newline> ecdysteroid metabolic process ; GO:0045455 | inferred from genomic context with Eo inferred from sequence or structural similarity with Eo	-	choline dehydrogenase activity ; GO:0008812 | inferred from sequence or structural similarity with EMBL:Z66494; protein_id:CAA91263 <newline> flavin adenine dinucleotide binding ; GO:0050660 | inferred from electronic annotation with InterPro:IPR000172 <newline> oxidoreductase activity ; GO:0016491 | inferred from sequence or structural similarity with Eo	-
Corynebacterium terpenotabidum	X_14787656_SNP	4.91e-06	FBgn0264078	Flo2	Flotillin 2	0	INTRON	+	cell adhesion ; GO:0007155 | non-traceable author statement <newline> melanotic encapsulation of foreign target ; GO:0035011 | inferred from mutant phenotype	flotillin complex ; GO:0016600 | non-traceable author statement <newline> plasma membrane ; GO:0005886 | inferred from direct assay	structural molecule activity ; GO:0005198 | non-traceable author statement	Hsap\FLOT2 <newline> Hsap\FLOT1
Corynebacterium terpenotabidum	X_14787700_SNP	7.5e-07	FBgn0030592	CG9514	CG9514	0	INTRON	-	oxidation-reduction process ; GO:0055114 | inferred from electronic annotation with InterPro:IPR000172, InterPro:IPR007867 <newline> ecdysteroid metabolic process ; GO:0045455 | inferred from genomic context with Eo inferred from sequence or structural similarity with Eo	-	choline dehydrogenase activity ; GO:0008812 | inferred from sequence or structural similarity with EMBL:Z66494; protein_id:CAA91263 <newline> flavin adenine dinucleotide binding ; GO:0050660 | inferred from electronic annotation with InterPro:IPR000172 <newline> oxidoreductase activity ; GO:0016491 | inferred from sequence or structural similarity with Eo	-
Corynebacterium terpenotabidum	X_14787700_SNP	7.5e-07	FBgn0264078	Flo2	Flotillin 2	0	INTRON	+	cell adhesion ; GO:0007155 | non-traceable author statement <newline> melanotic encapsulation of foreign target ; GO:0035011 | inferred from mutant phenotype	flotillin complex ; GO:0016600 | non-traceable author statement <newline> plasma membrane ; GO:0005886 | inferred from direct assay	structural molecule activity ; GO:0005198 | non-traceable author statement	Hsap\FLOT2 <newline> Hsap\FLOT1
Corynebacterium terpenotabidum	X_16066413_SNP	8.08e-06	Intergenic
Corynebacterium terpenotabidum	X_16184494_SNP	5.75e-06	FBgn0011571	caz	cabeza	0	INTRON	+	transcription initiation from RNA polymerase II promoter ; GO:0006367 | inferred from sequence or structural similarity with HGNC_gene:TAF12; HGNC:11545; OMIM:600773 <newline> mRNA splicing, via spliceosome ; GO:0000398 | inferred by curator from GO:0071013 <newline> adult locomotory behavior ; GO:0008344 | inferred from mutant phenotype <newline> compound eye development ; GO:0048749 | inferred …	transcription factor TFIID complex ; GO:0005669 | inferred from sequence or structural similarity with HGNC_gene:TAF12; HGNC:11545; OMIM:600773 <newline> nucleus ; GO:0005634 | non-traceable author statement <newline> catalytic step 2 spliceosome ; GO:0071013 | inferred from direct assay <newline> nucleus ; GO:0005634 | inferred from direct assay <newline> transcriptionally active chromatin ; GO:…	mRNA binding ; GO:0003729 | inferred from sequence or structural similarity <newline> zinc ion binding ; GO:0008270 | inferred from electronic annotation with InterPro:IPR001876 <newline> nucleic acid binding ; GO:0003676 | inferred from electronic annotation with InterPro:IPR000504 <newline> nucleotide binding ; GO:0000166 | inferred from electronic annotation with InterPro:IPR012677	Hsap\FUS <newline> Hsap\EWSR1 <newline> Hsap\TAF15
Corynebacterium terpenotabidum	2R_818045_DEL	4.9e-06	FBgn0040849	Ir41a	Ionotropic receptor 41a	0	INTRON	+	ionotropic glutamate receptor signaling pathway ; GO:0035235 | inferred from sequence or structural similarity with UniProtKB:Q61627 <newline> detection of chemical stimulus ; GO:0009593 | inferred from sequence or structural similarity with Ir92a	integral component of membrane ; GO:0016021 | inferred from sequence or structural similarity with UniProtKB:Q61627 <newline> integral component of membrane ; GO:0016021 | inferred from sequence model	ionotropic glutamate receptor activity ; GO:0004970 | inferred from sequence or structural similarity with UniProtKB:Q61627 <newline> ligand-gated ion channel activity ; GO:0015276 | inferred from sequence model <newline> extracellular-glutamate-gated ion channel activity ; GO:0005234 | inferred from electronic annotation with InterPro:IPR001320	-
Corynebacterium terpenotabidum	2R_818045_DEL	4.9e-06	Intergenic
Corynebacterium terpenotabidum	2R_1993362_DEL	6.84e-07	FBgn0000546	EcR	Ecdysone receptor	0	INTRON	-	spermatid development ; GO:0007286 | inferred from mutant phenotype <newline> sperm individualization ; GO:0007291 | inferred from mutant phenotype <newline> cell adhesion ; GO:0007155 | inferred from mutant phenotype <newline> regulation of transcription from RNA polymerase II promoter ; GO:0006357 | inferred from mutant phenotype <newline> imaginal disc-derived wing morphogenesis ; GO:0007476 |…	nucleus ; GO:0005634 | inferred from direct assay <newline> cytoplasm ; GO:0005737 | inferred from direct assay <newline> dendrite ; GO:0030425 | inferred from mutant phenotype <newline> nucleus ; GO:0005634 | non-traceable author statement <newline> polytene chromosome ; GO:0005700 | non-traceable author statement <newline> ecdysone receptor holocomplex ; GO:0008230 | traceable author statement …	ecdysteroid hormone receptor activity ; GO:0004884 | inferred from direct assay <newline> ligand-activated sequence-specific DNA binding RNA polymerase II transcription factor activity ; GO:0004879 | traceable author statement <newline> DNA binding ; GO:0003677 | non-traceable author statement <newline> steroid binding ; GO:0005496 | non-traceable author statement <newline> ligand-activated seque…	Hsap\NR1H3 <newline> Hsap\NR1H4
Corynebacterium terpenotabidum	2R_2430079_SNP	6.52e-08	FBgn0086655	jing	jing	0	INTRON	+	specification of segmental identity, maxillary segment ; GO:0007382 | inferred from expression pattern AND inferred from genetic interaction with Dfd <newline> border follicle cell migration ; GO:0007298 | inferred from mutant phenotype <newline> central nervous system development ; GO:0007417 | inferred from mutant phenotype <newline> open tracheal system development ; GO:0007424 | inferred from…	nucleus ; GO:0005634 | non-traceable author statement <newline> nucleus ; GO:0005634 | inferred from direct assay AND inferred from sequence or structural similarity with ci AND inferred from sequence or structural similarity with MGD:Aebp2; MGI:MGI:1338038 <newline> ESC/E(Z) complex ; GO:0035098 | inferred from direct assay	sequence-specific DNA binding transcription factor activity ; GO:0003700 | non-traceable author statement <newline> nucleic acid binding ; GO:0003676 | inferred from electronic annotation with InterPro:IPR013087 <newline> metal ion binding ; GO:0046872 | inferred from electronic annotation with InterPro:IPR007087	Hsap\AEBP2
Corynebacterium terpenotabidum	2R_2432138_DEL	8.74e-07	FBgn0086655	jing	jing	0	INTRON	+	specification of segmental identity, maxillary segment ; GO:0007382 | inferred from expression pattern AND inferred from genetic interaction with Dfd <newline> border follicle cell migration ; GO:0007298 | inferred from mutant phenotype <newline> central nervous system development ; GO:0007417 | inferred from mutant phenotype <newline> open tracheal system development ; GO:0007424 | inferred from…	nucleus ; GO:0005634 | non-traceable author statement <newline> nucleus ; GO:0005634 | inferred from direct assay AND inferred from sequence or structural similarity with ci AND inferred from sequence or structural similarity with MGD:Aebp2; MGI:MGI:1338038 <newline> ESC/E(Z) complex ; GO:0035098 | inferred from direct assay	sequence-specific DNA binding transcription factor activity ; GO:0003700 | non-traceable author statement <newline> nucleic acid binding ; GO:0003676 | inferred from electronic annotation with InterPro:IPR013087 <newline> metal ion binding ; GO:0046872 | inferred from electronic annotation with InterPro:IPR007087	Hsap\AEBP2
Corynebacterium terpenotabidum	2R_2494193_SNP	3.7e-06	FBgn0086655	jing	jing	0	INTRON	+	specification of segmental identity, maxillary segment ; GO:0007382 | inferred from expression pattern AND inferred from genetic interaction with Dfd <newline> border follicle cell migration ; GO:0007298 | inferred from mutant phenotype <newline> central nervous system development ; GO:0007417 | inferred from mutant phenotype <newline> open tracheal system development ; GO:0007424 | inferred from…	nucleus ; GO:0005634 | non-traceable author statement <newline> nucleus ; GO:0005634 | inferred from direct assay AND inferred from sequence or structural similarity with ci AND inferred from sequence or structural similarity with MGD:Aebp2; MGI:MGI:1338038 <newline> ESC/E(Z) complex ; GO:0035098 | inferred from direct assay	sequence-specific DNA binding transcription factor activity ; GO:0003700 | non-traceable author statement <newline> nucleic acid binding ; GO:0003676 | inferred from electronic annotation with InterPro:IPR013087 <newline> metal ion binding ; GO:0046872 | inferred from electronic annotation with InterPro:IPR007087	Hsap\AEBP2
Corynebacterium terpenotabidum	2R_2494193_SNP	3.7e-06	XLOC_006583			0	EXON	+
Corynebacterium terpenotabidum	2R_2494193_SNP	3.7e-06	XLOC_006584			270	5PRIME	+
Corynebacterium terpenotabidum	2R_6776629_INS	3.64e-06	FBgn0050020	CG30020	CG30020	0	INTRON	+	-	nucleus ; GO:0005634 | inferred from sequence or structural similarity with InterPro:IPR007087	nucleic acid binding ; GO:0003676 | inferred from sequence or structural similarity with InterPro:IPR007087 <newline> zinc ion binding ; GO:0008270 | inferred from electronic annotation with InterPro:IPR007087, InterPro:IPR012934, InterPro:IPR015880 <newline> DNA binding ; GO:0003677 | inferred from direct assay	-
Corynebacterium terpenotabidum	2R_6776629_INS	3.64e-06	XLOC_007034			0	EXON	+
Corynebacterium terpenotabidum	2R_18970910_SNP	4.34e-06	FBgn0045482	Gr59b	Gustatory receptor 59b	21	3PRIME	+	sensory perception of taste ; GO:0050909 | inferred from electronic annotation with InterPro:IPR013604	integral component of membrane ; GO:0016021 | inferred from electronic annotation with InterPro:IPR013604	taste receptor activity ; GO:0008527 | inferred from sequence or structural similarity with Gr5a	-
Corynebacterium terpenotabidum	2R_18970921_SNP	7.27e-06	FBgn0045482	Gr59b	Gustatory receptor 59b	32	3PRIME	+	sensory perception of taste ; GO:0050909 | inferred from electronic annotation with InterPro:IPR013604	integral component of membrane ; GO:0016021 | inferred from electronic annotation with InterPro:IPR013604	taste receptor activity ; GO:0008527 | inferred from sequence or structural similarity with Gr5a	-
Corynebacterium terpenotabidum	2L_2540876_SNP	4.61e-06	Intergenic
Corynebacterium terpenotabidum	2L_2540876_SNP	4.61e-06	Intergenic
Corynebacterium terpenotabidum	2L_2540876_SNP	4.61e-06	Intergenic
Corynebacterium terpenotabidum	2L_4328044_SNP	4.33e-06	FBgn0028482	CG16857	CG16857	0	INTRON	+	cell adhesion ; GO:0007155 | inferred from sequence or structural similarity with EMBL:AF074901	-	-	-
Corynebacterium terpenotabidum	2L_5626970_SNP	4.74e-06	FBgn0051646	CG31646	CG31646	0	EXON	-	-	-	-	-
Corynebacterium terpenotabidum	2L_11570962_DEL	5.26e-06	Intergenic
Corynebacterium terpenotabidum	2L_12304724_SNP	7.38e-06	FBgn0000114	aret	arrest	0	INTRON	+	spermatid development ; GO:0007286 | inferred from mutant phenotype <newline> negative regulation of oskar mRNA translation ; GO:0007319 | traceable author statement <newline> germarium-derived female germ-line cyst formation ; GO:0030727 | traceable author statement <newline> germ-line stem cell division ; GO:0042078 | non-traceable author statement <newline> mRNA polyadenylation ; GO:0006378 | …	nucleus ; GO:0005634 | inferred by curator from GO:0000381 <newline> P granule ; GO:0043186 | inferred from direct assay <newline> cytoplasm ; GO:0005737 | inferred from direct assay <newline> nucleus ; GO:0005634 | inferred from genetic interaction with sbr	mRNA binding ; GO:0003729 | inferred from sequence or structural similarity with HGNC_gene:CUGBP2; HGNC:2550; OMIM:602538 <newline> mRNA 3'-UTR binding ; GO:0003730 | inferred from direct assay <newline> mRNA binding ; GO:0003729 | non-traceable author statement <newline> mRNA 3'-UTR binding ; GO:0003730 | traceable author statement <newline> mRNA binding ; GO:0003729 | traceable author statement…	Hsap\CELF1 <newline> Hsap\CELF6 <newline> Hsap\TNRC4 <newline> Hsap\CELF4 <newline> Hsap\CELF5 <newline> Hsap\ENSG00000048740
Corynebacterium terpenotabidum	2L_12304724_SNP	7.38e-06	Intergenic
Corynebacterium terpenotabidum	2L_12306086_SNP	1.56e-06	FBgn0000114	aret	arrest	0	INTRON	+	spermatid development ; GO:0007286 | inferred from mutant phenotype <newline> negative regulation of oskar mRNA translation ; GO:0007319 | traceable author statement <newline> germarium-derived female germ-line cyst formation ; GO:0030727 | traceable author statement <newline> germ-line stem cell division ; GO:0042078 | non-traceable author statement <newline> mRNA polyadenylation ; GO:0006378 | …	nucleus ; GO:0005634 | inferred by curator from GO:0000381 <newline> P granule ; GO:0043186 | inferred from direct assay <newline> cytoplasm ; GO:0005737 | inferred from direct assay <newline> nucleus ; GO:0005634 | inferred from genetic interaction with sbr	mRNA binding ; GO:0003729 | inferred from sequence or structural similarity with HGNC_gene:CUGBP2; HGNC:2550; OMIM:602538 <newline> mRNA 3'-UTR binding ; GO:0003730 | inferred from direct assay <newline> mRNA binding ; GO:0003729 | non-traceable author statement <newline> mRNA 3'-UTR binding ; GO:0003730 | traceable author statement <newline> mRNA binding ; GO:0003729 | traceable author statement…	Hsap\CELF1 <newline> Hsap\CELF6 <newline> Hsap\TNRC4 <newline> Hsap\CELF4 <newline> Hsap\CELF5 <newline> Hsap\ENSG00000048740
Corynebacterium terpenotabidum	2L_12306413_DEL	5.04e-06	FBgn0000114	aret	arrest	0	INTRON	+	spermatid development ; GO:0007286 | inferred from mutant phenotype <newline> negative regulation of oskar mRNA translation ; GO:0007319 | traceable author statement <newline> germarium-derived female germ-line cyst formation ; GO:0030727 | traceable author statement <newline> germ-line stem cell division ; GO:0042078 | non-traceable author statement <newline> mRNA polyadenylation ; GO:0006378 | …	nucleus ; GO:0005634 | inferred by curator from GO:0000381 <newline> P granule ; GO:0043186 | inferred from direct assay <newline> cytoplasm ; GO:0005737 | inferred from direct assay <newline> nucleus ; GO:0005634 | inferred from genetic interaction with sbr	mRNA binding ; GO:0003729 | inferred from sequence or structural similarity with HGNC_gene:CUGBP2; HGNC:2550; OMIM:602538 <newline> mRNA 3'-UTR binding ; GO:0003730 | inferred from direct assay <newline> mRNA binding ; GO:0003729 | non-traceable author statement <newline> mRNA 3'-UTR binding ; GO:0003730 | traceable author statement <newline> mRNA binding ; GO:0003729 | traceable author statement…	Hsap\CELF1 <newline> Hsap\CELF6 <newline> Hsap\TNRC4 <newline> Hsap\CELF4 <newline> Hsap\CELF5 <newline> Hsap\ENSG00000048740
Corynebacterium terpenotabidum	2L_12480961_SNP	6.28e-06	FBgn0259176	bun	bunched	0	INTRON	-	decapentaplegic signaling pathway ; GO:0008101 | inferred from genetic interaction with dpp <newline> compound eye photoreceptor cell differentiation ; GO:0001751 | inferred from mutant phenotype <newline> segmentation ; GO:0035282 | inferred from mutant phenotype <newline> dorsal appendage formation ; GO:0046843 | inferred from mutant phenotype <newline> chorion-containing eggshell formation ; G…	cytoplasm ; GO:0005737 | inferred from direct assay <newline> nucleus ; GO:0005634 | non-traceable author statement <newline> cytoplasm ; GO:0005737 | non-traceable author statement	protein homodimerization activity ; GO:0042803 | inferred from sequence or structural similarity <newline> sequence-specific DNA binding transcription factor activity ; GO:0003700 | inferred from electronic annotation with InterPro:IPR000580	-
Corynebacterium terpenotabidum	2L_13538346_DEL	4.05e-08	FBgn0023407	B4	B4	0	INTRON	-	imaginal disc development ; GO:0007444 | inferred from mutant phenotype <newline> circadian rhythm ; GO:0007623 | inferred from expression pattern	-	-	-
Corynebacterium terpenotabidum	2L_13538346_DEL	4.05e-08	Intergenic
Corynebacterium terpenotabidum	2L_13538346_DEL	4.05e-08	Intergenic
Corynebacterium terpenotabidum	2L_13538364_DEL	4.05e-08	FBgn0023407	B4	B4	0	INTRON	-	imaginal disc development ; GO:0007444 | inferred from mutant phenotype <newline> circadian rhythm ; GO:0007623 | inferred from expression pattern	-	-	-
Corynebacterium terpenotabidum	2L_13538364_DEL	4.05e-08	Intergenic
Corynebacterium terpenotabidum	2L_13538364_DEL	4.05e-08	Intergenic
Corynebacterium terpenotabidum	2L_13538370_INS	6.19e-07	FBgn0023407	B4	B4	0	INTRON	-	imaginal disc development ; GO:0007444 | inferred from mutant phenotype <newline> circadian rhythm ; GO:0007623 | inferred from expression pattern	-	-	-
Corynebacterium terpenotabidum	2L_13538370_INS	6.19e-07	Intergenic
Corynebacterium terpenotabidum	2L_13538370_INS	6.19e-07	Intergenic
Corynebacterium terpenotabidum	2L_13869480_SNP	6.17e-06	FBgn0028509	CenG1A	Centaurin gamma 1A	0	INTRON	+	small GTPase mediated signal transduction ; GO:0007264 | non-traceable author statement <newline> regulation of ARF GTPase activity ; GO:0032312 | inferred from electronic annotation with InterPro:IPR001164 <newline> regulation of ARF GTPase activity ; GO:0032312 | inferred from sequence model	nucleus ; GO:0005634 | non-traceable author statement <newline> intracellular ; GO:0005622 | inferred from electronic annotation with InterPro:IPR013684	ARF GTPase activator activity ; GO:0008060 | non-traceable author statement <newline> ARF GTPase activator activity ; GO:0008060 | inferred from sequence or structural similarity with EMBL:AF075462 <newline> GTP binding ; GO:0005525 | inferred from electronic annotation with InterPro:IPR013684 <newline> zinc ion binding ; GO:0008270 | inferred from electronic annotation with InterPro:IPR001164 <n…	Hsap\AGAP7 <newline> Hsap\ENSG00000135439 <newline> Hsap\CENTG3 <newline> Hsap\AGAP10 <newline> Hsap\AGAP9 <newline> Hsap\AGAP8 <newline> Hsap\AGAP6 <newline> Hsap\AGAP4 <newline> Hsap\ENSG00000172650 <newline> Hsap\AGAP1
Corynebacterium terpenotabidum	2L_13869480_SNP	6.17e-06	Intergenic
Corynebacterium terpenotabidum	2L_18904086_SNP	9.44e-06	Intergenic
Corynebacterium terpenotabidum	2L_19678165_SNP	1.78e-06	FBgn0000464	Lar	Leukocyte-antigen-related-like	0	INTRON	+	protein dephosphorylation ; GO:0006470 | inferred from direct assay <newline> axon guidance ; GO:0007411 | inferred from mutant phenotype <newline> motor neuron axon guidance ; GO:0008045 | inferred from mutant phenotype <newline> motor neuron axon guidance ; GO:0008045 | traceable author statement <newline> protein dephosphorylation ; GO:0006470 | non-traceable author statement <newline> axon gu…	plasma membrane ; GO:0005886 | inferred from sequence or structural similarity <newline> integral component of membrane ; GO:0016021 | non-traceable author statement <newline> axon ; GO:0030424 | inferred from direct assay <newline> microtubule associated complex ; GO:0005875 | inferred from direct assay <newline> plasma membrane ; GO:0005886 | inferred from direct assay <newline> focal adhesion …	protein tyrosine phosphatase activity ; GO:0004725 | inferred from direct assay <newline> transmembrane receptor protein tyrosine phosphatase activity ; GO:0005001 | inferred from sequence or structural similarity <newline> protein tyrosine phosphatase activity ; GO:0004725 | non-traceable author statement <newline> transmembrane receptor protein tyrosine phosphatase activity ; GO:0005001 | infer…	Hsap\ENSG00000105426 <newline> Hsap\PTPRF <newline> Hsap\PTPRD
Corynebacterium terpenotabidum	2L_19678165_SNP	1.78e-06	XLOC_002676			915	3PRIME	+
Corynebacterium terpenotabidum	2L_19678165_SNP	1.78e-06	Intergenic
Corynebacterium terpenotabidum	2L_19678165_SNP	1.78e-06	XLOC_002678			680	5PRIME	+
Corynebacterium terpenotabidum	2L_19678165_SNP	1.78e-06	Intergenic
Corynebacterium terpenotabidum	2L_19684983_SNP	5.44e-06	FBgn0000464	Lar	Leukocyte-antigen-related-like	0	INTRON	+	protein dephosphorylation ; GO:0006470 | inferred from direct assay <newline> axon guidance ; GO:0007411 | inferred from mutant phenotype <newline> motor neuron axon guidance ; GO:0008045 | inferred from mutant phenotype <newline> motor neuron axon guidance ; GO:0008045 | traceable author statement <newline> protein dephosphorylation ; GO:0006470 | non-traceable author statement <newline> axon gu…	plasma membrane ; GO:0005886 | inferred from sequence or structural similarity <newline> integral component of membrane ; GO:0016021 | non-traceable author statement <newline> axon ; GO:0030424 | inferred from direct assay <newline> microtubule associated complex ; GO:0005875 | inferred from direct assay <newline> plasma membrane ; GO:0005886 | inferred from direct assay <newline> focal adhesion …	protein tyrosine phosphatase activity ; GO:0004725 | inferred from direct assay <newline> transmembrane receptor protein tyrosine phosphatase activity ; GO:0005001 | inferred from sequence or structural similarity <newline> protein tyrosine phosphatase activity ; GO:0004725 | non-traceable author statement <newline> transmembrane receptor protein tyrosine phosphatase activity ; GO:0005001 | infer…	Hsap\ENSG00000105426 <newline> Hsap\PTPRF <newline> Hsap\PTPRD
Corynebacterium terpenotabidum	2L_19684983_SNP	5.44e-06	XLOC_002680			0	EXON	+
Corynebacterium terpenotabidum	2L_19684983_SNP	5.44e-06	Intergenic
Corynebacterium terpenotabidum	2L_19684983_SNP	5.44e-06	Intergenic
Corynebacterium terpenotabidum	2L_22943777_DEL	6.24e-06	Intergenic
Corynebacterium terpenotabidum	2L_22943777_DEL	6.24e-06	Intergenic
Corynebacterium terpenotabidum	3R_11698675_SNP	8.78e-06	FBgn0051183	CG31183	CG31183	0	INTRON	-	intracellular signal transduction ; GO:0035556 | inferred from electronic annotation with InterPro:IPR001054, InterPro:IPR018297 <newline> cyclic nucleotide biosynthetic process ; GO:0009190 | inferred from electronic annotation with InterPro:IPR001054, InterPro:IPR018297 <newline> protein phosphorylation ; GO:0006468 | NOT inferred from key residues	integral component of membrane ; GO:0016021 | inferred from electronic annotation with InterPro:IPR001170	guanylate cyclase activity ; GO:0004383 | non-traceable author statement <newline> guanylate cyclase activity ; GO:0004383 | inferred from sequence or structural similarity with MGD:Npr1; MGI:MGI:97371 <newline> natriuretic peptide receptor activity ; GO:0016941 | inferred from sequence or structural similarity with UniProtKB:P55202 <newline> ATP binding ; GO:0005524 | inferred from electronic an…	Hsap\NPR1 <newline> Hsap\NPR2
Corynebacterium terpenotabidum	3R_22503831_SNP	4.5e-07	FBgn0250908	beat-VII	beat-VII	0	INTRON	-	heterophilic cell-cell adhesion ; GO:0007157 | inferred from sequence or structural similarity with beat-Ic	extracellular region ; GO:0005576 | non-traceable author statement	molecular_function ; GO:0003674 | no biological data available	Hsap\NUP35
Corynebacterium terpenotabidum	3L_10242130_SNP	8.59e-06	FBgn0265733	CR44540	CR44540	442	5PRIME	-	-	-	-	-
Corynebacterium terpenotabidum	3L_10242147_SNP	2.37e-06	FBgn0265733	CR44540	CR44540	459	5PRIME	-	-	-	-	-
Corynebacterium terpenotabidum	3L_12706623_SNP	1.1e-06	Intergenic
Corynebacterium terpenotabidum	3L_12706626_SNP	1.1e-06	Intergenic
Corynebacterium terpenotabidum	3L_21193852_DEL	8.08e-06	FBgn0053054	CG33054	CG33054	0	INTRON	-	-	-	-	Hsap\ENSG00000124596
Corynebacterium terpenotabidum	3L_21193852_DEL	8.08e-06	FBgn0053056	CG33056	CG33056	0	INTRON	-	-	-	-	Hsap\ENSG00000124596
Corynebacterium terpenotabidum	3L_21193852_DEL	8.08e-06	XLOC_018564			514	3PRIME	-
Methylobacterium extorquens	X_3808014_SNP	3.82e-06	FBgn0260658	CG42541	CG42541	0	INTRON	-	small GTPase mediated signal transduction ; GO:0007264 | inferred from electronic annotation with InterPro:IPR001806 <newline> GTP catabolic process ; GO:0006184 | inferred from electronic annotation with InterPro:IPR020849 <newline> phagocytosis ; GO:0006909 | inferred from mutant phenotype	membrane ; GO:0016020 | inferred from electronic annotation with InterPro:IPR020849	GTP binding ; GO:0005525 | inferred from sequence or structural similarity with EMBL:U91601	-
Methylobacterium extorquens	X_3808025_SNP	4.21e-06	FBgn0260658	CG42541	CG42541	0	INTRON	-	small GTPase mediated signal transduction ; GO:0007264 | inferred from electronic annotation with InterPro:IPR001806 <newline> GTP catabolic process ; GO:0006184 | inferred from electronic annotation with InterPro:IPR020849 <newline> phagocytosis ; GO:0006909 | inferred from mutant phenotype	membrane ; GO:0016020 | inferred from electronic annotation with InterPro:IPR020849	GTP binding ; GO:0005525 | inferred from sequence or structural similarity with EMBL:U91601	-
Methylobacterium extorquens	X_3808045_INS	8.17e-06	FBgn0260658	CG42541	CG42541	0	INTRON	-	small GTPase mediated signal transduction ; GO:0007264 | inferred from electronic annotation with InterPro:IPR001806 <newline> GTP catabolic process ; GO:0006184 | inferred from electronic annotation with InterPro:IPR020849 <newline> phagocytosis ; GO:0006909 | inferred from mutant phenotype	membrane ; GO:0016020 | inferred from electronic annotation with InterPro:IPR020849	GTP binding ; GO:0005525 | inferred from sequence or structural similarity with EMBL:U91601	-
Methylobacterium extorquens	X_10412575_SNP	8.19e-06	FBgn0085443	spri	sprint	0	INTRON	-	border follicle cell migration ; GO:0007298 | inferred from genetic interaction with Cbl inferred from genetic interaction with Egfr inferred from genetic interaction with Pvr <newline> endocytosis ; GO:0006897 | inferred from sequence or structural similarity with UniProtKB:Q8TB24 <newline> signal transduction ; GO:0007165 | inferred from electronic annotation with InterPro:IPR000159 <newline> r…	cell cortex ; GO:0005938 | inferred from direct assay <newline> endocytic vesicle ; GO:0030139 | inferred from direct assay	Ras GTPase binding ; GO:0017016 | inferred from sequence or structural similarity <newline> Ras GTPase binding ; GO:0017016 | inferred from sequence or structural similarity with EMBL:U80076 <newline> Ras GTPase binding ; GO:0017016 | inferred from sequence or structural similarity with UniProtKB:Q8TB24 <newline> Rab guanyl-nucleotide exchange factor activity ; GO:0017112 | inferred from sequence…	-
Methylobacterium extorquens	X_10412575_SNP	8.19e-06	Intergenic
Methylobacterium extorquens	X_10412713_SNP	7.22e-06	FBgn0085443	spri	sprint	0	INTRON	-	border follicle cell migration ; GO:0007298 | inferred from genetic interaction with Cbl inferred from genetic interaction with Egfr inferred from genetic interaction with Pvr <newline> endocytosis ; GO:0006897 | inferred from sequence or structural similarity with UniProtKB:Q8TB24 <newline> signal transduction ; GO:0007165 | inferred from electronic annotation with InterPro:IPR000159 <newline> r…	cell cortex ; GO:0005938 | inferred from direct assay <newline> endocytic vesicle ; GO:0030139 | inferred from direct assay	Ras GTPase binding ; GO:0017016 | inferred from sequence or structural similarity <newline> Ras GTPase binding ; GO:0017016 | inferred from sequence or structural similarity with EMBL:U80076 <newline> Ras GTPase binding ; GO:0017016 | inferred from sequence or structural similarity with UniProtKB:Q8TB24 <newline> Rab guanyl-nucleotide exchange factor activity ; GO:0017112 | inferred from sequence…	-
Methylobacterium extorquens	X_10412713_SNP	7.22e-06	Intergenic
Methylobacterium extorquens	X_14113441_SNP	9.21e-06	FBgn0026713	l(1)G0007	lethal (1) G0007	0	INTRON	+	mRNA splicing, via spliceosome ; GO:0000398 | inferred from sequence or structural similarity with NCBI_NP:054722 AND inferred from sequence or structural similarity with SGD_LOCUS:PRP16; SGD:S0001794 <newline> regulation of alternative mRNA splicing, via spliceosome ; GO:0000381 | inferred from mutant phenotype <newline> inter-male aggressive behavior ; GO:0002121 | inferred from mutant phenotyp…	spliceosomal complex ; GO:0005681 | inferred from sequence or structural similarity with NCBI_NP:054722 AND inferred from sequence or structural similarity with SGD_LOCUS:PRP16; SGD:S0001794	ATP-dependent RNA helicase activity ; GO:0004004 | inferred from sequence or structural similarity with SGD_LOCUS:PRP16; SGD:S0001794 <newline> ATP-dependent helicase activity ; GO:0008026 | inferred from sequence or structural similarity with UniProtKB:Q92620 <newline> ATP binding ; GO:0005524 | inferred from electronic annotation with InterPro:IPR001650, InterPro:IPR002464, InterPro:IPR011545 <…	Hsap\DHX8 <newline> Hsap\DHX16 <newline> Hsap\DHX38 <newline> Hsap\DHX15
Methylobacterium extorquens	2R_16490397_SNP	2.24e-06	FBgn0015907	bl	bancal	0	INTRON	+	appendage morphogenesis ; GO:0035107 | traceable author statement <newline> cell fate commitment ; GO:0045165 | traceable author statement <newline> cell proliferation ; GO:0008283 | traceable author statement <newline> imaginal disc growth ; GO:0007446 | traceable author statement <newline> regulation of alternative mRNA splicing, via spliceosome ; GO:0000381 | inferred from mutant phenotype	ribonucleoprotein complex ; GO:0030529 | inferred from sequence or structural similarity <newline> chromatin ; GO:0000785 | inferred from direct assay <newline> nucleus ; GO:0005634 | inferred from direct assay <newline> omega speckle ; GO:0035062 | inferred from direct assay <newline> ribonucleoprotein complex ; GO:0030529 | inferred from sequence or structural similarity with HGNC_gene:HNRNPK; …	mRNA binding ; GO:0003729 | non-traceable author statement <newline> mRNA binding ; GO:0003729 | traceable author statement <newline> transcription factor binding ; GO:0008134 | traceable author statement <newline> RNA binding ; GO:0003723 | inferred from electronic annotation with InterPro:IPR004087, InterPro:IPR004088, InterPro:IPR018111	Hsap\HNRPK
Methylobacterium extorquens	2R_16490397_SNP	2.24e-06	XLOC_008295			507	3PRIME	+
Methylobacterium extorquens	2R_16492134_SNP	1.56e-06	FBgn0015907	bl	bancal	0	INTRON	+	appendage morphogenesis ; GO:0035107 | traceable author statement <newline> cell fate commitment ; GO:0045165 | traceable author statement <newline> cell proliferation ; GO:0008283 | traceable author statement <newline> imaginal disc growth ; GO:0007446 | traceable author statement <newline> regulation of alternative mRNA splicing, via spliceosome ; GO:0000381 | inferred from mutant phenotype	ribonucleoprotein complex ; GO:0030529 | inferred from sequence or structural similarity <newline> chromatin ; GO:0000785 | inferred from direct assay <newline> nucleus ; GO:0005634 | inferred from direct assay <newline> omega speckle ; GO:0035062 | inferred from direct assay <newline> ribonucleoprotein complex ; GO:0030529 | inferred from sequence or structural similarity with HGNC_gene:HNRNPK; …	mRNA binding ; GO:0003729 | non-traceable author statement <newline> mRNA binding ; GO:0003729 | traceable author statement <newline> transcription factor binding ; GO:0008134 | traceable author statement <newline> RNA binding ; GO:0003723 | inferred from electronic annotation with InterPro:IPR004087, InterPro:IPR004088, InterPro:IPR018111	Hsap\HNRPK
Methylobacterium extorquens	2R_16492149_SNP	1.56e-06	FBgn0015907	bl	bancal	0	INTRON	+	appendage morphogenesis ; GO:0035107 | traceable author statement <newline> cell fate commitment ; GO:0045165 | traceable author statement <newline> cell proliferation ; GO:0008283 | traceable author statement <newline> imaginal disc growth ; GO:0007446 | traceable author statement <newline> regulation of alternative mRNA splicing, via spliceosome ; GO:0000381 | inferred from mutant phenotype	ribonucleoprotein complex ; GO:0030529 | inferred from sequence or structural similarity <newline> chromatin ; GO:0000785 | inferred from direct assay <newline> nucleus ; GO:0005634 | inferred from direct assay <newline> omega speckle ; GO:0035062 | inferred from direct assay <newline> ribonucleoprotein complex ; GO:0030529 | inferred from sequence or structural similarity with HGNC_gene:HNRNPK; …	mRNA binding ; GO:0003729 | non-traceable author statement <newline> mRNA binding ; GO:0003729 | traceable author statement <newline> transcription factor binding ; GO:0008134 | traceable author statement <newline> RNA binding ; GO:0003723 | inferred from electronic annotation with InterPro:IPR004087, InterPro:IPR004088, InterPro:IPR018111	Hsap\HNRPK
Methylobacterium extorquens	2L_3299748_SNP	6.82e-06	FBgn0031516	CG9663	CG9663	0	INTRON	-	-	ATP-binding cassette (ABC) transporter complex ; GO:0043190 | inferred from sequence or structural similarity with UniProtKB:P45844	ATPase activity, coupled to transmembrane movement of substances ; GO:0042626 | inferred from sequence or structural similarity with UniProtKB:P45844 <newline> transporter activity ; GO:0005215 | inferred from sequence or structural similarity with UniProtKB:P45844 <newline> ATP binding ; GO:0005524 | inferred from electronic annotation with InterPro:IPR003439, InterPro:IPR017871, InterPro:IPR020…	Hsap\ABCG4 <newline> Hsap\ENSG00000160179
Methylobacterium extorquens	3R_18653421_SNP	8.59e-06	FBgn0265450	CR44350	CR44350	439	5PRIME	-	-	-	-	-
Methylobacterium extorquens	3R_18653421_SNP	8.59e-06	Intergenic
Methylobacterium extorquens	3R_18653421_SNP	8.59e-06	Intergenic
Methylobacterium extorquens	3R_18653421_SNP	8.59e-06	Intergenic
Methylobacterium extorquens	3R_26585378_SNP	2e-06	Intergenic
Methylobacterium extorquens	3L_7879399_SNP	5.06e-06	FBgn0052365	CG32365	CG32365	0	INTRON	+	cellular process ; GO:0009987 | inferred from mutant phenotype	-	-	-
Methylobacterium extorquens	3L_8813425_INS	3.24e-06	Intergenic
Methylobacterium extorquens	3L_8813425_INS	3.24e-06	Intergenic
Methylobacterium extorquens	3L_8813425_INS	3.24e-06	Intergenic
Methylobacterium extorquens	3L_18166031_SNP	2.84e-06	FBgn0003997	W	Wrinkled	0	INTRON	-	response to red light ; GO:0010114 | inferred from mutant phenotype <newline> entrainment of circadian clock by photoperiod ; GO:0043153 | inferred from mutant phenotype <newline> head involution ; GO:0008258 | inferred from mutant phenotype <newline> instar larval or pupal development ; GO:0002165 | inferred from mutant phenotype <newline> programmed cell death ; GO:0012501 | inferred from genet…	mitochondrion ; GO:0005739 | inferred from direct assay	protein binding ; GO:0005515 | inferred from physical interaction with th	-
Leuconostoc pseudomesenteroides	X_9180981_SNP	3.99e-06	FBgn0002576	lz	lozenge	0	INTRON	+	crystal cell differentiation ; GO:0042688 | inferred from mutant phenotype <newline> embryonic crystal cell differentiation ; GO:0035165 | inferred from expression pattern <newline> embryonic hemopoiesis ; GO:0035162 | inferred from mutant phenotype <newline> embryonic crystal cell differentiation ; GO:0035165 | inferred from mutant phenotype <newline> embryonic hemocyte differentiation ; GO:0035…	nucleus ; GO:0005634 | inferred from sequence or structural similarity with run AND inferred from sequence or structural similarity with HGNC_gene:RUNX1; HGNC:10471; OMIM:151385 AND inferred from sequence or structural similarity with MGD:Runx2; MGI:MGI:99829 <newline> nucleus ; GO:0005634 | inferred by curator from GO:0003677 <newline> nucleus ; GO:0005634 | inferred from direct assay	RNA polymerase II distal enhancer sequence-specific DNA binding transcription factor activity ; GO:0003705 | non-traceable author statement <newline> sequence-specific DNA binding transcription factor activity ; GO:0003700 | non-traceable author statement <newline> DNA binding ; GO:0003677 | inferred from direct assay <newline> sequence-specific DNA binding ; GO:0043565 | inferred from direct ass…	Hsap\RUNX2 <newline> Hsap\RUNX3 <newline> Hsap\RUNX1
Leuconostoc pseudomesenteroides	X_10044470_SNP	8.11e-06	FBgn0266199	CR44894	CR44894	0	INTRON	-	-	-	-	-
Leuconostoc pseudomesenteroides	2R_9339782_SNP	9.34e-06	FBgn0086757	cbs	centrosomin's beautiful sister	0	INTRON	+	centrosome cycle ; GO:0007098 | inferred from mutant phenotype <newline> protein targeting to Golgi ; GO:0000042 | inferred from electronic annotation with InterPro:IPR000237 <newline> Golgi vesicle transport ; GO:0048193 | inferred by curator from GO:0000138|GO:0017137	chromatin ; GO:0000785 | inferred from direct assay <newline> cytoplasm ; GO:0005737 | inferred from direct assay <newline> spindle ; GO:0005819 | inferred from direct assay <newline> perinuclear region of cytoplasm ; GO:0048471 | inferred from direct assay <newline> centrosome ; GO:0005813 | non-traceable author statement <newline> Golgi trans cisterna ; GO:0000138 | inferred from direct assay	ADP-ribosylation factor binding ; GO:0030306 | inferred from physical interaction with Arl1 <newline> Rab GTPase binding ; GO:0017137 | inferred from physical interaction with Rab6, Rab30, Rab19 <newline> protein homodimerization activity ; GO:0042803 | inferred from sequence model	Hsap\GOLGA1
Leuconostoc pseudomesenteroides	2R_14141748_SNP	2.97e-06	Intergenic
Leuconostoc pseudomesenteroides	2L_5403164_SNP	1.65e-06	Intergenic
Leuconostoc pseudomesenteroides	2L_5403308_SNP	6.78e-06	FBgn0016660	H15	H15	972	5PRIME	+	heart development ; GO:0007507 | inferred from mutant phenotype <newline> cardioblast cell fate commitment ; GO:0042684 | inferred from mutant phenotype <newline> embryonic heart tube development ; GO:0035050 | inferred from mutant phenotype <newline> neurogenesis ; GO:0022008 | inferred from mutant phenotype <newline> heart process ; GO:0003015 | inferred from direct assay <newline> leg disc pat…	nucleus ; GO:0005634 | inferred from sequence or structural similarity with EMBL:AF013282 <newline> nucleus ; GO:0005634 | non-traceable author statement	sequence-specific DNA binding transcription factor activity ; GO:0003700 | inferred from sequence or structural similarity with EMBL:AF013282	Hsap\TBX22 <newline> Hsap\T <newline> Hsap\TBX10 <newline> Hsap\TBX5 <newline> Hsap\TBX15 <newline> Hsap\TBX4 <newline> Hsap\TBX20 <newline> Hsap\TBX18 <newline> Hsap\TBX19 <newline> Hsap\TBX1
Leuconostoc pseudomesenteroides	2L_5403308_SNP	6.78e-06	Intergenic
Leuconostoc pseudomesenteroides	2L_5403316_SNP	6.62e-06	FBgn0016660	H15	H15	964	5PRIME	+	heart development ; GO:0007507 | inferred from mutant phenotype <newline> cardioblast cell fate commitment ; GO:0042684 | inferred from mutant phenotype <newline> embryonic heart tube development ; GO:0035050 | inferred from mutant phenotype <newline> neurogenesis ; GO:0022008 | inferred from mutant phenotype <newline> heart process ; GO:0003015 | inferred from direct assay <newline> leg disc pat…	nucleus ; GO:0005634 | inferred from sequence or structural similarity with EMBL:AF013282 <newline> nucleus ; GO:0005634 | non-traceable author statement	sequence-specific DNA binding transcription factor activity ; GO:0003700 | inferred from sequence or structural similarity with EMBL:AF013282	Hsap\TBX22 <newline> Hsap\T <newline> Hsap\TBX10 <newline> Hsap\TBX5 <newline> Hsap\TBX15 <newline> Hsap\TBX4 <newline> Hsap\TBX20 <newline> Hsap\TBX18 <newline> Hsap\TBX19 <newline> Hsap\TBX1
Leuconostoc pseudomesenteroides	2L_5403316_SNP	6.62e-06	Intergenic
Leuconostoc pseudomesenteroides	2L_5403419_SNP	7.14e-06	FBgn0016660	H15	H15	861	5PRIME	+	heart development ; GO:0007507 | inferred from mutant phenotype <newline> cardioblast cell fate commitment ; GO:0042684 | inferred from mutant phenotype <newline> embryonic heart tube development ; GO:0035050 | inferred from mutant phenotype <newline> neurogenesis ; GO:0022008 | inferred from mutant phenotype <newline> heart process ; GO:0003015 | inferred from direct assay <newline> leg disc pat…	nucleus ; GO:0005634 | inferred from sequence or structural similarity with EMBL:AF013282 <newline> nucleus ; GO:0005634 | non-traceable author statement	sequence-specific DNA binding transcription factor activity ; GO:0003700 | inferred from sequence or structural similarity with EMBL:AF013282	Hsap\TBX22 <newline> Hsap\T <newline> Hsap\TBX10 <newline> Hsap\TBX5 <newline> Hsap\TBX15 <newline> Hsap\TBX4 <newline> Hsap\TBX20 <newline> Hsap\TBX18 <newline> Hsap\TBX19 <newline> Hsap\TBX1
Leuconostoc pseudomesenteroides	2L_5403419_SNP	7.14e-06	Intergenic
Leuconostoc pseudomesenteroides	2L_5403535_SNP	7.93e-06	FBgn0016660	H15	H15	745	5PRIME	+	heart development ; GO:0007507 | inferred from mutant phenotype <newline> cardioblast cell fate commitment ; GO:0042684 | inferred from mutant phenotype <newline> embryonic heart tube development ; GO:0035050 | inferred from mutant phenotype <newline> neurogenesis ; GO:0022008 | inferred from mutant phenotype <newline> heart process ; GO:0003015 | inferred from direct assay <newline> leg disc pat…	nucleus ; GO:0005634 | inferred from sequence or structural similarity with EMBL:AF013282 <newline> nucleus ; GO:0005634 | non-traceable author statement	sequence-specific DNA binding transcription factor activity ; GO:0003700 | inferred from sequence or structural similarity with EMBL:AF013282	Hsap\TBX22 <newline> Hsap\T <newline> Hsap\TBX10 <newline> Hsap\TBX5 <newline> Hsap\TBX15 <newline> Hsap\TBX4 <newline> Hsap\TBX20 <newline> Hsap\TBX18 <newline> Hsap\TBX19 <newline> Hsap\TBX1
Leuconostoc pseudomesenteroides	2L_5403535_SNP	7.93e-06	Intergenic
Leuconostoc pseudomesenteroides	3R_13025799_SNP	2.25e-06	FBgn0038492	Mur89F	Mucin related 89F	0	INTRON	-	chitin metabolic process ; GO:0006030 | inferred from electronic annotation with InterPro:IPR002557	extracellular region ; GO:0005576 | inferred from electronic annotation with InterPro:IPR002557 <newline> extracellular matrix ; GO:0031012 | inferred from sequence model	chitin binding ; GO:0008061 | inferred from electronic annotation with InterPro:IPR002557 <newline> extracellular matrix structural constituent ; GO:0005201 | inferred from sequence model	-
Leuconostoc pseudomesenteroides	3R_13025799_SNP	2.25e-06	Intergenic
Leuconostoc pseudomesenteroides	3R_13025886_SNP	5.5e-06	FBgn0038492	Mur89F	Mucin related 89F	0	INTRON	-	chitin metabolic process ; GO:0006030 | inferred from electronic annotation with InterPro:IPR002557	extracellular region ; GO:0005576 | inferred from electronic annotation with InterPro:IPR002557 <newline> extracellular matrix ; GO:0031012 | inferred from sequence model	chitin binding ; GO:0008061 | inferred from electronic annotation with InterPro:IPR002557 <newline> extracellular matrix structural constituent ; GO:0005201 | inferred from sequence model	-
Leuconostoc pseudomesenteroides	3R_13025886_SNP	5.5e-06	Intergenic
Leuconostoc pseudomesenteroides	3L_1618969_SNP	1.13e-06	FBgn0035243	CG13926	CG13926	811	5PRIME	-	biological_process ; GO:0008150 | no biological data available	cellular_component ; GO:0005575 | no biological data available	molecular_function ; GO:0003674 | no biological data available	Hsap\C11orf73
Leuconostoc pseudomesenteroides	3L_1618969_SNP	1.13e-06	FBgn0035244	ABCB7	ABCB7	0	INTRON	+	heme transport ; GO:0015886 | inferred from sequence or structural similarity with UniProtKB:O75027 <newline> iron-sulfur cluster assembly ; GO:0016226 | inferred from sequence or structural similarity with UniProtKB:O75027 <newline> transmembrane transport ; GO:0055085 | inferred from biological aspect of ancestor with PANTHER:PTN000657188 <newline> cellular iron ion homeostasis ; GO:0006879 | i…	ATP-binding cassette (ABC) transporter complex ; GO:0043190 | inferred from sequence or structural similarity with EMBL:U43892 <newline> mitochondrial inner membrane ; GO:0005743 | inferred from sequence or structural similarity with UniProtKB:O75027 <newline> integral component of membrane ; GO:0016021 | inferred from biological aspect of ancestor with PANTHER:PTN000657188 <newline> mitochondria…	ATPase activity, coupled to transmembrane movement of substances ; GO:0042626 | inferred from sequence or structural similarity with EMBL:U43892 <newline> transporter activity ; GO:0005215 | inferred from sequence or structural similarity with EMBL:U43892 <newline> ATPase activity, coupled to transmembrane movement of substances ; GO:0042626 | inferred from sequence or structural similarity with …	Hsap\ENSG00000131269 <newline> Hsap\ABCB6
Leuconostoc pseudomesenteroides	3L_1618969_SNP	1.13e-06	FBgn0053230	CG33230	CG33230	0	EXON	+	biological_process ; GO:0008150 | no biological data available	cellular_component ; GO:0005575 | no biological data available	molecular_function ; GO:0003674 | no biological data available	Hsap\SETD4
Leuconostoc pseudomesenteroides	3L_1622254_SNP	8.68e-08	FBgn0035244	ABCB7	ABCB7	0	EXON	+	heme transport ; GO:0015886 | inferred from sequence or structural similarity with UniProtKB:O75027 <newline> iron-sulfur cluster assembly ; GO:0016226 | inferred from sequence or structural similarity with UniProtKB:O75027 <newline> transmembrane transport ; GO:0055085 | inferred from biological aspect of ancestor with PANTHER:PTN000657188 <newline> cellular iron ion homeostasis ; GO:0006879 | i…	ATP-binding cassette (ABC) transporter complex ; GO:0043190 | inferred from sequence or structural similarity with EMBL:U43892 <newline> mitochondrial inner membrane ; GO:0005743 | inferred from sequence or structural similarity with UniProtKB:O75027 <newline> integral component of membrane ; GO:0016021 | inferred from biological aspect of ancestor with PANTHER:PTN000657188 <newline> mitochondria…	ATPase activity, coupled to transmembrane movement of substances ; GO:0042626 | inferred from sequence or structural similarity with EMBL:U43892 <newline> transporter activity ; GO:0005215 | inferred from sequence or structural similarity with EMBL:U43892 <newline> ATPase activity, coupled to transmembrane movement of substances ; GO:0042626 | inferred from sequence or structural similarity with …	Hsap\ENSG00000131269 <newline> Hsap\ABCB6
Leuconostoc pseudomesenteroides	3L_1622254_SNP	8.68e-08	FBgn0035245	GC	gamma-glutamyl carboxylase	925	3PRIME	-	peptidyl-glutamic acid carboxylation ; GO:0017187 | inferred from direct assay <newline> protein carboxylation ; GO:0018214 | inferred from direct assay	-	gamma-glutamyl carboxylase activity ; GO:0008488 | inferred from direct assay <newline> gamma-glutamyl carboxylase activity ; GO:0008488 | inferred from sequence or structural similarity <newline> gamma-glutamyl carboxylase activity ; GO:0008488 | inferred from sequence or structural similarity with UniProtKB:Q07175	Hsap\GGCX
Leuconostoc pseudomesenteroides	3L_1622350_SNP	6.71e-06	FBgn0035244	ABCB7	ABCB7	0	EXON	+	heme transport ; GO:0015886 | inferred from sequence or structural similarity with UniProtKB:O75027 <newline> iron-sulfur cluster assembly ; GO:0016226 | inferred from sequence or structural similarity with UniProtKB:O75027 <newline> transmembrane transport ; GO:0055085 | inferred from biological aspect of ancestor with PANTHER:PTN000657188 <newline> cellular iron ion homeostasis ; GO:0006879 | i…	ATP-binding cassette (ABC) transporter complex ; GO:0043190 | inferred from sequence or structural similarity with EMBL:U43892 <newline> mitochondrial inner membrane ; GO:0005743 | inferred from sequence or structural similarity with UniProtKB:O75027 <newline> integral component of membrane ; GO:0016021 | inferred from biological aspect of ancestor with PANTHER:PTN000657188 <newline> mitochondria…	ATPase activity, coupled to transmembrane movement of substances ; GO:0042626 | inferred from sequence or structural similarity with EMBL:U43892 <newline> transporter activity ; GO:0005215 | inferred from sequence or structural similarity with EMBL:U43892 <newline> ATPase activity, coupled to transmembrane movement of substances ; GO:0042626 | inferred from sequence or structural similarity with …	Hsap\ENSG00000131269 <newline> Hsap\ABCB6
Leuconostoc pseudomesenteroides	3L_1622350_SNP	6.71e-06	FBgn0035245	GC	gamma-glutamyl carboxylase	829	3PRIME	-	peptidyl-glutamic acid carboxylation ; GO:0017187 | inferred from direct assay <newline> protein carboxylation ; GO:0018214 | inferred from direct assay	-	gamma-glutamyl carboxylase activity ; GO:0008488 | inferred from direct assay <newline> gamma-glutamyl carboxylase activity ; GO:0008488 | inferred from sequence or structural similarity <newline> gamma-glutamyl carboxylase activity ; GO:0008488 | inferred from sequence or structural similarity with UniProtKB:Q07175	Hsap\GGCX
Leuconostoc pseudomesenteroides	3L_1622773_SNP	3.53e-06	FBgn0035244	ABCB7	ABCB7	0	EXON	+	heme transport ; GO:0015886 | inferred from sequence or structural similarity with UniProtKB:O75027 <newline> iron-sulfur cluster assembly ; GO:0016226 | inferred from sequence or structural similarity with UniProtKB:O75027 <newline> transmembrane transport ; GO:0055085 | inferred from biological aspect of ancestor with PANTHER:PTN000657188 <newline> cellular iron ion homeostasis ; GO:0006879 | i…	ATP-binding cassette (ABC) transporter complex ; GO:0043190 | inferred from sequence or structural similarity with EMBL:U43892 <newline> mitochondrial inner membrane ; GO:0005743 | inferred from sequence or structural similarity with UniProtKB:O75027 <newline> integral component of membrane ; GO:0016021 | inferred from biological aspect of ancestor with PANTHER:PTN000657188 <newline> mitochondria…	ATPase activity, coupled to transmembrane movement of substances ; GO:0042626 | inferred from sequence or structural similarity with EMBL:U43892 <newline> transporter activity ; GO:0005215 | inferred from sequence or structural similarity with EMBL:U43892 <newline> ATPase activity, coupled to transmembrane movement of substances ; GO:0042626 | inferred from sequence or structural similarity with …	Hsap\ENSG00000131269 <newline> Hsap\ABCB6
Leuconostoc pseudomesenteroides	3L_1622773_SNP	3.53e-06	FBgn0035245	GC	gamma-glutamyl carboxylase	406	3PRIME	-	peptidyl-glutamic acid carboxylation ; GO:0017187 | inferred from direct assay <newline> protein carboxylation ; GO:0018214 | inferred from direct assay	-	gamma-glutamyl carboxylase activity ; GO:0008488 | inferred from direct assay <newline> gamma-glutamyl carboxylase activity ; GO:0008488 | inferred from sequence or structural similarity <newline> gamma-glutamyl carboxylase activity ; GO:0008488 | inferred from sequence or structural similarity with UniProtKB:Q07175	Hsap\GGCX
Leuconostoc pseudomesenteroides	3L_1623382_SNP	3.9e-06	FBgn0035244	ABCB7	ABCB7	0	EXON	+	heme transport ; GO:0015886 | inferred from sequence or structural similarity with UniProtKB:O75027 <newline> iron-sulfur cluster assembly ; GO:0016226 | inferred from sequence or structural similarity with UniProtKB:O75027 <newline> transmembrane transport ; GO:0055085 | inferred from biological aspect of ancestor with PANTHER:PTN000657188 <newline> cellular iron ion homeostasis ; GO:0006879 | i…	ATP-binding cassette (ABC) transporter complex ; GO:0043190 | inferred from sequence or structural similarity with EMBL:U43892 <newline> mitochondrial inner membrane ; GO:0005743 | inferred from sequence or structural similarity with UniProtKB:O75027 <newline> integral component of membrane ; GO:0016021 | inferred from biological aspect of ancestor with PANTHER:PTN000657188 <newline> mitochondria…	ATPase activity, coupled to transmembrane movement of substances ; GO:0042626 | inferred from sequence or structural similarity with EMBL:U43892 <newline> transporter activity ; GO:0005215 | inferred from sequence or structural similarity with EMBL:U43892 <newline> ATPase activity, coupled to transmembrane movement of substances ; GO:0042626 | inferred from sequence or structural similarity with …	Hsap\ENSG00000131269 <newline> Hsap\ABCB6
Leuconostoc pseudomesenteroides	3L_1623382_SNP	3.9e-06	FBgn0035245	GC	gamma-glutamyl carboxylase	0	EXON	-	peptidyl-glutamic acid carboxylation ; GO:0017187 | inferred from direct assay <newline> protein carboxylation ; GO:0018214 | inferred from direct assay	-	gamma-glutamyl carboxylase activity ; GO:0008488 | inferred from direct assay <newline> gamma-glutamyl carboxylase activity ; GO:0008488 | inferred from sequence or structural similarity <newline> gamma-glutamyl carboxylase activity ; GO:0008488 | inferred from sequence or structural similarity with UniProtKB:Q07175	Hsap\GGCX
Leuconostoc pseudomesenteroides	3L_1625055_SNP	5.39e-06	FBgn0035245	GC	gamma-glutamyl carboxylase	0	INTRON	-	peptidyl-glutamic acid carboxylation ; GO:0017187 | inferred from direct assay <newline> protein carboxylation ; GO:0018214 | inferred from direct assay	-	gamma-glutamyl carboxylase activity ; GO:0008488 | inferred from direct assay <newline> gamma-glutamyl carboxylase activity ; GO:0008488 | inferred from sequence or structural similarity <newline> gamma-glutamyl carboxylase activity ; GO:0008488 | inferred from sequence or structural similarity with UniProtKB:Q07175	Hsap\GGCX
Leuconostoc pseudomesenteroides	3L_1625055_SNP	5.39e-06	FBgn0035246	CG13928	CG13928	736	3PRIME	-	-	-	zinc ion binding ; GO:0008270 | inferred from electronic annotation with InterPro:IPR001965	-
Leuconostoc pseudomesenteroides	3L_1625152_SNP	1.31e-06	FBgn0035245	GC	gamma-glutamyl carboxylase	0	EXON	-	peptidyl-glutamic acid carboxylation ; GO:0017187 | inferred from direct assay <newline> protein carboxylation ; GO:0018214 | inferred from direct assay	-	gamma-glutamyl carboxylase activity ; GO:0008488 | inferred from direct assay <newline> gamma-glutamyl carboxylase activity ; GO:0008488 | inferred from sequence or structural similarity <newline> gamma-glutamyl carboxylase activity ; GO:0008488 | inferred from sequence or structural similarity with UniProtKB:Q07175	Hsap\GGCX
Leuconostoc pseudomesenteroides	3L_1625152_SNP	1.31e-06	FBgn0035246	CG13928	CG13928	639	3PRIME	-	-	-	zinc ion binding ; GO:0008270 | inferred from electronic annotation with InterPro:IPR001965	-
Leuconostoc pseudomesenteroides	3L_1625275_SNP	9.94e-06	FBgn0035245	GC	gamma-glutamyl carboxylase	0	EXON	-	peptidyl-glutamic acid carboxylation ; GO:0017187 | inferred from direct assay <newline> protein carboxylation ; GO:0018214 | inferred from direct assay	-	gamma-glutamyl carboxylase activity ; GO:0008488 | inferred from direct assay <newline> gamma-glutamyl carboxylase activity ; GO:0008488 | inferred from sequence or structural similarity <newline> gamma-glutamyl carboxylase activity ; GO:0008488 | inferred from sequence or structural similarity with UniProtKB:Q07175	Hsap\GGCX
Leuconostoc pseudomesenteroides	3L_1625275_SNP	9.94e-06	FBgn0035246	CG13928	CG13928	516	3PRIME	-	-	-	zinc ion binding ; GO:0008270 | inferred from electronic annotation with InterPro:IPR001965	-
Leuconostoc pseudomesenteroides	3L_1625353_SNP	1.55e-06	FBgn0035245	GC	gamma-glutamyl carboxylase	0	EXON	-	peptidyl-glutamic acid carboxylation ; GO:0017187 | inferred from direct assay <newline> protein carboxylation ; GO:0018214 | inferred from direct assay	-	gamma-glutamyl carboxylase activity ; GO:0008488 | inferred from direct assay <newline> gamma-glutamyl carboxylase activity ; GO:0008488 | inferred from sequence or structural similarity <newline> gamma-glutamyl carboxylase activity ; GO:0008488 | inferred from sequence or structural similarity with UniProtKB:Q07175	Hsap\GGCX
Leuconostoc pseudomesenteroides	3L_1625353_SNP	1.55e-06	FBgn0035246	CG13928	CG13928	438	3PRIME	-	-	-	zinc ion binding ; GO:0008270 | inferred from electronic annotation with InterPro:IPR001965	-
Leuconostoc pseudomesenteroides	3L_1626925_SNP	3.76e-10	FBgn0035245	GC	gamma-glutamyl carboxylase	0	INTRON	-	peptidyl-glutamic acid carboxylation ; GO:0017187 | inferred from direct assay <newline> protein carboxylation ; GO:0018214 | inferred from direct assay	-	gamma-glutamyl carboxylase activity ; GO:0008488 | inferred from direct assay <newline> gamma-glutamyl carboxylase activity ; GO:0008488 | inferred from sequence or structural similarity <newline> gamma-glutamyl carboxylase activity ; GO:0008488 | inferred from sequence or structural similarity with UniProtKB:Q07175	Hsap\GGCX
Leuconostoc pseudomesenteroides	3L_1626925_SNP	3.76e-10	FBgn0035246	CG13928	CG13928	0	EXON	-	-	-	zinc ion binding ; GO:0008270 | inferred from electronic annotation with InterPro:IPR001965	-
Leuconostoc pseudomesenteroides	3L_1626928_SNP	1.04e-09	FBgn0035245	GC	gamma-glutamyl carboxylase	0	INTRON	-	peptidyl-glutamic acid carboxylation ; GO:0017187 | inferred from direct assay <newline> protein carboxylation ; GO:0018214 | inferred from direct assay	-	gamma-glutamyl carboxylase activity ; GO:0008488 | inferred from direct assay <newline> gamma-glutamyl carboxylase activity ; GO:0008488 | inferred from sequence or structural similarity <newline> gamma-glutamyl carboxylase activity ; GO:0008488 | inferred from sequence or structural similarity with UniProtKB:Q07175	Hsap\GGCX
Leuconostoc pseudomesenteroides	3L_1626928_SNP	1.04e-09	FBgn0035246	CG13928	CG13928	0	EXON	-	-	-	zinc ion binding ; GO:0008270 | inferred from electronic annotation with InterPro:IPR001965	-
Leuconostoc pseudomesenteroides	3L_1626990_SNP	6.35e-10	FBgn0035245	GC	gamma-glutamyl carboxylase	0	INTRON	-	peptidyl-glutamic acid carboxylation ; GO:0017187 | inferred from direct assay <newline> protein carboxylation ; GO:0018214 | inferred from direct assay	-	gamma-glutamyl carboxylase activity ; GO:0008488 | inferred from direct assay <newline> gamma-glutamyl carboxylase activity ; GO:0008488 | inferred from sequence or structural similarity <newline> gamma-glutamyl carboxylase activity ; GO:0008488 | inferred from sequence or structural similarity with UniProtKB:Q07175	Hsap\GGCX
Leuconostoc pseudomesenteroides	3L_1626990_SNP	6.35e-10	FBgn0035246	CG13928	CG13928	0	EXON	-	-	-	zinc ion binding ; GO:0008270 | inferred from electronic annotation with InterPro:IPR001965	-
Leuconostoc pseudomesenteroides	3L_1627539_SNP	2.73e-06	FBgn0035245	GC	gamma-glutamyl carboxylase	0	INTRON	-	peptidyl-glutamic acid carboxylation ; GO:0017187 | inferred from direct assay <newline> protein carboxylation ; GO:0018214 | inferred from direct assay	-	gamma-glutamyl carboxylase activity ; GO:0008488 | inferred from direct assay <newline> gamma-glutamyl carboxylase activity ; GO:0008488 | inferred from sequence or structural similarity <newline> gamma-glutamyl carboxylase activity ; GO:0008488 | inferred from sequence or structural similarity with UniProtKB:Q07175	Hsap\GGCX
Leuconostoc pseudomesenteroides	3L_1627539_SNP	2.73e-06	FBgn0035246	CG13928	CG13928	0	EXON	-	-	-	zinc ion binding ; GO:0008270 | inferred from electronic annotation with InterPro:IPR001965	-
Leuconostoc pseudomesenteroides	3L_1627882_SNP	6.37e-11	FBgn0035245	GC	gamma-glutamyl carboxylase	0	INTRON	-	peptidyl-glutamic acid carboxylation ; GO:0017187 | inferred from direct assay <newline> protein carboxylation ; GO:0018214 | inferred from direct assay	-	gamma-glutamyl carboxylase activity ; GO:0008488 | inferred from direct assay <newline> gamma-glutamyl carboxylase activity ; GO:0008488 | inferred from sequence or structural similarity <newline> gamma-glutamyl carboxylase activity ; GO:0008488 | inferred from sequence or structural similarity with UniProtKB:Q07175	Hsap\GGCX
Leuconostoc pseudomesenteroides	3L_1627882_SNP	6.37e-11	FBgn0035246	CG13928	CG13928	0	EXON	-	-	-	zinc ion binding ; GO:0008270 | inferred from electronic annotation with InterPro:IPR001965	-
Leuconostoc pseudomesenteroides	3L_1627965_SNP	5.83e-12	FBgn0035245	GC	gamma-glutamyl carboxylase	0	INTRON	-	peptidyl-glutamic acid carboxylation ; GO:0017187 | inferred from direct assay <newline> protein carboxylation ; GO:0018214 | inferred from direct assay	-	gamma-glutamyl carboxylase activity ; GO:0008488 | inferred from direct assay <newline> gamma-glutamyl carboxylase activity ; GO:0008488 | inferred from sequence or structural similarity <newline> gamma-glutamyl carboxylase activity ; GO:0008488 | inferred from sequence or structural similarity with UniProtKB:Q07175	Hsap\GGCX
Leuconostoc pseudomesenteroides	3L_1627965_SNP	5.83e-12	FBgn0035246	CG13928	CG13928	0	EXON	-	-	-	zinc ion binding ; GO:0008270 | inferred from electronic annotation with InterPro:IPR001965	-
Leuconostoc pseudomesenteroides	3L_1628027_SNP	1.12e-09	FBgn0035245	GC	gamma-glutamyl carboxylase	0	INTRON	-	peptidyl-glutamic acid carboxylation ; GO:0017187 | inferred from direct assay <newline> protein carboxylation ; GO:0018214 | inferred from direct assay	-	gamma-glutamyl carboxylase activity ; GO:0008488 | inferred from direct assay <newline> gamma-glutamyl carboxylase activity ; GO:0008488 | inferred from sequence or structural similarity <newline> gamma-glutamyl carboxylase activity ; GO:0008488 | inferred from sequence or structural similarity with UniProtKB:Q07175	Hsap\GGCX
Leuconostoc pseudomesenteroides	3L_1628027_SNP	1.12e-09	FBgn0035246	CG13928	CG13928	0	EXON	-	-	-	zinc ion binding ; GO:0008270 | inferred from electronic annotation with InterPro:IPR001965	-
Leuconostoc pseudomesenteroides	3L_1628158_SNP	1.2e-12	FBgn0035245	GC	gamma-glutamyl carboxylase	0	INTRON	-	peptidyl-glutamic acid carboxylation ; GO:0017187 | inferred from direct assay <newline> protein carboxylation ; GO:0018214 | inferred from direct assay	-	gamma-glutamyl carboxylase activity ; GO:0008488 | inferred from direct assay <newline> gamma-glutamyl carboxylase activity ; GO:0008488 | inferred from sequence or structural similarity <newline> gamma-glutamyl carboxylase activity ; GO:0008488 | inferred from sequence or structural similarity with UniProtKB:Q07175	Hsap\GGCX
Leuconostoc pseudomesenteroides	3L_1628158_SNP	1.2e-12	FBgn0035246	CG13928	CG13928	0	EXON	-	-	-	zinc ion binding ; GO:0008270 | inferred from electronic annotation with InterPro:IPR001965	-
Leuconostoc pseudomesenteroides	3L_1628476_SNP	1.76e-11	FBgn0035245	GC	gamma-glutamyl carboxylase	0	INTRON	-	peptidyl-glutamic acid carboxylation ; GO:0017187 | inferred from direct assay <newline> protein carboxylation ; GO:0018214 | inferred from direct assay	-	gamma-glutamyl carboxylase activity ; GO:0008488 | inferred from direct assay <newline> gamma-glutamyl carboxylase activity ; GO:0008488 | inferred from sequence or structural similarity <newline> gamma-glutamyl carboxylase activity ; GO:0008488 | inferred from sequence or structural similarity with UniProtKB:Q07175	Hsap\GGCX
Leuconostoc pseudomesenteroides	3L_1628476_SNP	1.76e-11	FBgn0035246	CG13928	CG13928	99	5PRIME	-	-	-	zinc ion binding ; GO:0008270 | inferred from electronic annotation with InterPro:IPR001965	-
Leuconostoc pseudomesenteroides	3L_1628537_SNP	1.91e-11	FBgn0035245	GC	gamma-glutamyl carboxylase	0	INTRON	-	peptidyl-glutamic acid carboxylation ; GO:0017187 | inferred from direct assay <newline> protein carboxylation ; GO:0018214 | inferred from direct assay	-	gamma-glutamyl carboxylase activity ; GO:0008488 | inferred from direct assay <newline> gamma-glutamyl carboxylase activity ; GO:0008488 | inferred from sequence or structural similarity <newline> gamma-glutamyl carboxylase activity ; GO:0008488 | inferred from sequence or structural similarity with UniProtKB:Q07175	Hsap\GGCX
Leuconostoc pseudomesenteroides	3L_1628537_SNP	1.91e-11	FBgn0035246	CG13928	CG13928	160	5PRIME	-	-	-	zinc ion binding ; GO:0008270 | inferred from electronic annotation with InterPro:IPR001965	-
Leuconostoc pseudomesenteroides	3L_1628680_SNP	6.39e-07	FBgn0035245	GC	gamma-glutamyl carboxylase	0	INTRON	-	peptidyl-glutamic acid carboxylation ; GO:0017187 | inferred from direct assay <newline> protein carboxylation ; GO:0018214 | inferred from direct assay	-	gamma-glutamyl carboxylase activity ; GO:0008488 | inferred from direct assay <newline> gamma-glutamyl carboxylase activity ; GO:0008488 | inferred from sequence or structural similarity <newline> gamma-glutamyl carboxylase activity ; GO:0008488 | inferred from sequence or structural similarity with UniProtKB:Q07175	Hsap\GGCX
Leuconostoc pseudomesenteroides	3L_1628680_SNP	6.39e-07	FBgn0035246	CG13928	CG13928	303	5PRIME	-	-	-	zinc ion binding ; GO:0008270 | inferred from electronic annotation with InterPro:IPR001965	-
Leuconostoc pseudomesenteroides	3L_1628722_DEL	6.39e-08	FBgn0035245	GC	gamma-glutamyl carboxylase	0	INTRON	-	peptidyl-glutamic acid carboxylation ; GO:0017187 | inferred from direct assay <newline> protein carboxylation ; GO:0018214 | inferred from direct assay	-	gamma-glutamyl carboxylase activity ; GO:0008488 | inferred from direct assay <newline> gamma-glutamyl carboxylase activity ; GO:0008488 | inferred from sequence or structural similarity <newline> gamma-glutamyl carboxylase activity ; GO:0008488 | inferred from sequence or structural similarity with UniProtKB:Q07175	Hsap\GGCX
Leuconostoc pseudomesenteroides	3L_1628722_DEL	6.39e-08	FBgn0035246	CG13928	CG13928	345	5PRIME	-	-	-	zinc ion binding ; GO:0008270 | inferred from electronic annotation with InterPro:IPR001965	-
Leuconostoc pseudomesenteroides	3L_1628835_SNP	4.58e-06	FBgn0035245	GC	gamma-glutamyl carboxylase	0	INTRON	-	peptidyl-glutamic acid carboxylation ; GO:0017187 | inferred from direct assay <newline> protein carboxylation ; GO:0018214 | inferred from direct assay	-	gamma-glutamyl carboxylase activity ; GO:0008488 | inferred from direct assay <newline> gamma-glutamyl carboxylase activity ; GO:0008488 | inferred from sequence or structural similarity <newline> gamma-glutamyl carboxylase activity ; GO:0008488 | inferred from sequence or structural similarity with UniProtKB:Q07175	Hsap\GGCX
Leuconostoc pseudomesenteroides	3L_1628835_SNP	4.58e-06	FBgn0035246	CG13928	CG13928	458	5PRIME	-	-	-	zinc ion binding ; GO:0008270 | inferred from electronic annotation with InterPro:IPR001965	-
Leuconostoc pseudomesenteroides	3L_1628846_SNP	2.68e-06	FBgn0035245	GC	gamma-glutamyl carboxylase	0	INTRON	-	peptidyl-glutamic acid carboxylation ; GO:0017187 | inferred from direct assay <newline> protein carboxylation ; GO:0018214 | inferred from direct assay	-	gamma-glutamyl carboxylase activity ; GO:0008488 | inferred from direct assay <newline> gamma-glutamyl carboxylase activity ; GO:0008488 | inferred from sequence or structural similarity <newline> gamma-glutamyl carboxylase activity ; GO:0008488 | inferred from sequence or structural similarity with UniProtKB:Q07175	Hsap\GGCX
Leuconostoc pseudomesenteroides	3L_1628846_SNP	2.68e-06	FBgn0035246	CG13928	CG13928	469	5PRIME	-	-	-	zinc ion binding ; GO:0008270 | inferred from electronic annotation with InterPro:IPR001965	-
Leuconostoc pseudomesenteroides	3L_1628852_SNP	6.85e-13	FBgn0035245	GC	gamma-glutamyl carboxylase	0	INTRON	-	peptidyl-glutamic acid carboxylation ; GO:0017187 | inferred from direct assay <newline> protein carboxylation ; GO:0018214 | inferred from direct assay	-	gamma-glutamyl carboxylase activity ; GO:0008488 | inferred from direct assay <newline> gamma-glutamyl carboxylase activity ; GO:0008488 | inferred from sequence or structural similarity <newline> gamma-glutamyl carboxylase activity ; GO:0008488 | inferred from sequence or structural similarity with UniProtKB:Q07175	Hsap\GGCX
Leuconostoc pseudomesenteroides	3L_1628852_SNP	6.85e-13	FBgn0035246	CG13928	CG13928	475	5PRIME	-	-	-	zinc ion binding ; GO:0008270 | inferred from electronic annotation with InterPro:IPR001965	-
Leuconostoc pseudomesenteroides	3L_1628864_SNP	1.1e-06	FBgn0035245	GC	gamma-glutamyl carboxylase	0	INTRON	-	peptidyl-glutamic acid carboxylation ; GO:0017187 | inferred from direct assay <newline> protein carboxylation ; GO:0018214 | inferred from direct assay	-	gamma-glutamyl carboxylase activity ; GO:0008488 | inferred from direct assay <newline> gamma-glutamyl carboxylase activity ; GO:0008488 | inferred from sequence or structural similarity <newline> gamma-glutamyl carboxylase activity ; GO:0008488 | inferred from sequence or structural similarity with UniProtKB:Q07175	Hsap\GGCX
Leuconostoc pseudomesenteroides	3L_1628864_SNP	1.1e-06	FBgn0035246	CG13928	CG13928	487	5PRIME	-	-	-	zinc ion binding ; GO:0008270 | inferred from electronic annotation with InterPro:IPR001965	-
Leuconostoc pseudomesenteroides	3L_1628978_SNP	4.2e-12	FBgn0035245	GC	gamma-glutamyl carboxylase	0	INTRON	-	peptidyl-glutamic acid carboxylation ; GO:0017187 | inferred from direct assay <newline> protein carboxylation ; GO:0018214 | inferred from direct assay	-	gamma-glutamyl carboxylase activity ; GO:0008488 | inferred from direct assay <newline> gamma-glutamyl carboxylase activity ; GO:0008488 | inferred from sequence or structural similarity <newline> gamma-glutamyl carboxylase activity ; GO:0008488 | inferred from sequence or structural similarity with UniProtKB:Q07175	Hsap\GGCX
Leuconostoc pseudomesenteroides	3L_1628978_SNP	4.2e-12	FBgn0035246	CG13928	CG13928	601	5PRIME	-	-	-	zinc ion binding ; GO:0008270 | inferred from electronic annotation with InterPro:IPR001965	-
Leuconostoc pseudomesenteroides	3L_1629536_SNP	2.24e-13	FBgn0013342	nSyb	neuronal Synaptobrevin	812	3PRIME	-	neurotransmitter secretion ; GO:0007269 | non-traceable author statement <newline> vesicle-mediated transport ; GO:0016192 | non-traceable author statement <newline> synaptic vesicle docking involved in exocytosis ; GO:0016081 | inferred from sequence or structural similarity <newline> vesicle-mediated transport ; GO:0016192 | inferred from sequence or structural similarity <newline> vesicle fusi…	plasma membrane ; GO:0005886 | non-traceable author statement <newline> synaptic vesicle ; GO:0008021 | non-traceable author statement <newline> synaptic vesicle ; GO:0008021 | inferred from sequence or structural similarity <newline> synaptic vesicle ; GO:0008021 | inferred from direct assay <newline> plasma membrane ; GO:0005886 | inferred from direct assay <newline> terminal bouton ; GO:004319…	SNAP receptor activity ; GO:0005484 | inferred from sequence or structural similarity <newline> SNAP receptor activity ; GO:0005484 | non-traceable author statement <newline> SNARE binding ; GO:0000149 | inferred from physical interaction with Snap25, Syx1A <newline> SNAP receptor activity ; GO:0005484 | inferred from direct assay <newline> protein binding ; GO:0005515 | inferred from physical in…	Hsap\ENSG00000139190 <newline> Hsap\VAMP2 <newline> Hsap\VAMP3 <newline> Hsap\ENSG00000263620
Leuconostoc pseudomesenteroides	3L_1629536_SNP	2.24e-13	FBgn0035245	GC	gamma-glutamyl carboxylase	235	5PRIME	-	peptidyl-glutamic acid carboxylation ; GO:0017187 | inferred from direct assay <newline> protein carboxylation ; GO:0018214 | inferred from direct assay	-	gamma-glutamyl carboxylase activity ; GO:0008488 | inferred from direct assay <newline> gamma-glutamyl carboxylase activity ; GO:0008488 | inferred from sequence or structural similarity <newline> gamma-glutamyl carboxylase activity ; GO:0008488 | inferred from sequence or structural similarity with UniProtKB:Q07175	Hsap\GGCX
Leuconostoc pseudomesenteroides	3L_1630015_DEL	4.32e-13	FBgn0013342	nSyb	neuronal Synaptobrevin	333	3PRIME	-	neurotransmitter secretion ; GO:0007269 | non-traceable author statement <newline> vesicle-mediated transport ; GO:0016192 | non-traceable author statement <newline> synaptic vesicle docking involved in exocytosis ; GO:0016081 | inferred from sequence or structural similarity <newline> vesicle-mediated transport ; GO:0016192 | inferred from sequence or structural similarity <newline> vesicle fusi…	plasma membrane ; GO:0005886 | non-traceable author statement <newline> synaptic vesicle ; GO:0008021 | non-traceable author statement <newline> synaptic vesicle ; GO:0008021 | inferred from sequence or structural similarity <newline> synaptic vesicle ; GO:0008021 | inferred from direct assay <newline> plasma membrane ; GO:0005886 | inferred from direct assay <newline> terminal bouton ; GO:004319…	SNAP receptor activity ; GO:0005484 | inferred from sequence or structural similarity <newline> SNAP receptor activity ; GO:0005484 | non-traceable author statement <newline> SNARE binding ; GO:0000149 | inferred from physical interaction with Snap25, Syx1A <newline> SNAP receptor activity ; GO:0005484 | inferred from direct assay <newline> protein binding ; GO:0005515 | inferred from physical in…	Hsap\ENSG00000139190 <newline> Hsap\VAMP2 <newline> Hsap\VAMP3 <newline> Hsap\ENSG00000263620
Leuconostoc pseudomesenteroides	3L_1630015_DEL	4.32e-13	FBgn0035245	GC	gamma-glutamyl carboxylase	714	5PRIME	-	peptidyl-glutamic acid carboxylation ; GO:0017187 | inferred from direct assay <newline> protein carboxylation ; GO:0018214 | inferred from direct assay	-	gamma-glutamyl carboxylase activity ; GO:0008488 | inferred from direct assay <newline> gamma-glutamyl carboxylase activity ; GO:0008488 | inferred from sequence or structural similarity <newline> gamma-glutamyl carboxylase activity ; GO:0008488 | inferred from sequence or structural similarity with UniProtKB:Q07175	Hsap\GGCX
Leuconostoc pseudomesenteroides	3L_1630031_SNP	7.69e-12	FBgn0013342	nSyb	neuronal Synaptobrevin	317	3PRIME	-	neurotransmitter secretion ; GO:0007269 | non-traceable author statement <newline> vesicle-mediated transport ; GO:0016192 | non-traceable author statement <newline> synaptic vesicle docking involved in exocytosis ; GO:0016081 | inferred from sequence or structural similarity <newline> vesicle-mediated transport ; GO:0016192 | inferred from sequence or structural similarity <newline> vesicle fusi…	plasma membrane ; GO:0005886 | non-traceable author statement <newline> synaptic vesicle ; GO:0008021 | non-traceable author statement <newline> synaptic vesicle ; GO:0008021 | inferred from sequence or structural similarity <newline> synaptic vesicle ; GO:0008021 | inferred from direct assay <newline> plasma membrane ; GO:0005886 | inferred from direct assay <newline> terminal bouton ; GO:004319…	SNAP receptor activity ; GO:0005484 | inferred from sequence or structural similarity <newline> SNAP receptor activity ; GO:0005484 | non-traceable author statement <newline> SNARE binding ; GO:0000149 | inferred from physical interaction with Snap25, Syx1A <newline> SNAP receptor activity ; GO:0005484 | inferred from direct assay <newline> protein binding ; GO:0005515 | inferred from physical in…	Hsap\ENSG00000139190 <newline> Hsap\VAMP2 <newline> Hsap\VAMP3 <newline> Hsap\ENSG00000263620
Leuconostoc pseudomesenteroides	3L_1630031_SNP	7.69e-12	FBgn0035245	GC	gamma-glutamyl carboxylase	730	5PRIME	-	peptidyl-glutamic acid carboxylation ; GO:0017187 | inferred from direct assay <newline> protein carboxylation ; GO:0018214 | inferred from direct assay	-	gamma-glutamyl carboxylase activity ; GO:0008488 | inferred from direct assay <newline> gamma-glutamyl carboxylase activity ; GO:0008488 | inferred from sequence or structural similarity <newline> gamma-glutamyl carboxylase activity ; GO:0008488 | inferred from sequence or structural similarity with UniProtKB:Q07175	Hsap\GGCX
Leuconostoc pseudomesenteroides	3L_1630105_SNP	1.14e-07	FBgn0013342	nSyb	neuronal Synaptobrevin	243	3PRIME	-	neurotransmitter secretion ; GO:0007269 | non-traceable author statement <newline> vesicle-mediated transport ; GO:0016192 | non-traceable author statement <newline> synaptic vesicle docking involved in exocytosis ; GO:0016081 | inferred from sequence or structural similarity <newline> vesicle-mediated transport ; GO:0016192 | inferred from sequence or structural similarity <newline> vesicle fusi…	plasma membrane ; GO:0005886 | non-traceable author statement <newline> synaptic vesicle ; GO:0008021 | non-traceable author statement <newline> synaptic vesicle ; GO:0008021 | inferred from sequence or structural similarity <newline> synaptic vesicle ; GO:0008021 | inferred from direct assay <newline> plasma membrane ; GO:0005886 | inferred from direct assay <newline> terminal bouton ; GO:004319…	SNAP receptor activity ; GO:0005484 | inferred from sequence or structural similarity <newline> SNAP receptor activity ; GO:0005484 | non-traceable author statement <newline> SNARE binding ; GO:0000149 | inferred from physical interaction with Snap25, Syx1A <newline> SNAP receptor activity ; GO:0005484 | inferred from direct assay <newline> protein binding ; GO:0005515 | inferred from physical in…	Hsap\ENSG00000139190 <newline> Hsap\VAMP2 <newline> Hsap\VAMP3 <newline> Hsap\ENSG00000263620
Leuconostoc pseudomesenteroides	3L_1630105_SNP	1.14e-07	FBgn0035245	GC	gamma-glutamyl carboxylase	804	5PRIME	-	peptidyl-glutamic acid carboxylation ; GO:0017187 | inferred from direct assay <newline> protein carboxylation ; GO:0018214 | inferred from direct assay	-	gamma-glutamyl carboxylase activity ; GO:0008488 | inferred from direct assay <newline> gamma-glutamyl carboxylase activity ; GO:0008488 | inferred from sequence or structural similarity <newline> gamma-glutamyl carboxylase activity ; GO:0008488 | inferred from sequence or structural similarity with UniProtKB:Q07175	Hsap\GGCX
Leuconostoc pseudomesenteroides	3L_1630157_SNP	1.52e-12	FBgn0013342	nSyb	neuronal Synaptobrevin	191	3PRIME	-	neurotransmitter secretion ; GO:0007269 | non-traceable author statement <newline> vesicle-mediated transport ; GO:0016192 | non-traceable author statement <newline> synaptic vesicle docking involved in exocytosis ; GO:0016081 | inferred from sequence or structural similarity <newline> vesicle-mediated transport ; GO:0016192 | inferred from sequence or structural similarity <newline> vesicle fusi…	plasma membrane ; GO:0005886 | non-traceable author statement <newline> synaptic vesicle ; GO:0008021 | non-traceable author statement <newline> synaptic vesicle ; GO:0008021 | inferred from sequence or structural similarity <newline> synaptic vesicle ; GO:0008021 | inferred from direct assay <newline> plasma membrane ; GO:0005886 | inferred from direct assay <newline> terminal bouton ; GO:004319…	SNAP receptor activity ; GO:0005484 | inferred from sequence or structural similarity <newline> SNAP receptor activity ; GO:0005484 | non-traceable author statement <newline> SNARE binding ; GO:0000149 | inferred from physical interaction with Snap25, Syx1A <newline> SNAP receptor activity ; GO:0005484 | inferred from direct assay <newline> protein binding ; GO:0005515 | inferred from physical in…	Hsap\ENSG00000139190 <newline> Hsap\VAMP2 <newline> Hsap\VAMP3 <newline> Hsap\ENSG00000263620
Leuconostoc pseudomesenteroides	3L_1630157_SNP	1.52e-12	FBgn0035245	GC	gamma-glutamyl carboxylase	856	5PRIME	-	peptidyl-glutamic acid carboxylation ; GO:0017187 | inferred from direct assay <newline> protein carboxylation ; GO:0018214 | inferred from direct assay	-	gamma-glutamyl carboxylase activity ; GO:0008488 | inferred from direct assay <newline> gamma-glutamyl carboxylase activity ; GO:0008488 | inferred from sequence or structural similarity <newline> gamma-glutamyl carboxylase activity ; GO:0008488 | inferred from sequence or structural similarity with UniProtKB:Q07175	Hsap\GGCX
Leuconostoc pseudomesenteroides	3L_1630239_SNP	1.04e-11	FBgn0013342	nSyb	neuronal Synaptobrevin	109	3PRIME	-	neurotransmitter secretion ; GO:0007269 | non-traceable author statement <newline> vesicle-mediated transport ; GO:0016192 | non-traceable author statement <newline> synaptic vesicle docking involved in exocytosis ; GO:0016081 | inferred from sequence or structural similarity <newline> vesicle-mediated transport ; GO:0016192 | inferred from sequence or structural similarity <newline> vesicle fusi…	plasma membrane ; GO:0005886 | non-traceable author statement <newline> synaptic vesicle ; GO:0008021 | non-traceable author statement <newline> synaptic vesicle ; GO:0008021 | inferred from sequence or structural similarity <newline> synaptic vesicle ; GO:0008021 | inferred from direct assay <newline> plasma membrane ; GO:0005886 | inferred from direct assay <newline> terminal bouton ; GO:004319…	SNAP receptor activity ; GO:0005484 | inferred from sequence or structural similarity <newline> SNAP receptor activity ; GO:0005484 | non-traceable author statement <newline> SNARE binding ; GO:0000149 | inferred from physical interaction with Snap25, Syx1A <newline> SNAP receptor activity ; GO:0005484 | inferred from direct assay <newline> protein binding ; GO:0005515 | inferred from physical in…	Hsap\ENSG00000139190 <newline> Hsap\VAMP2 <newline> Hsap\VAMP3 <newline> Hsap\ENSG00000263620
Leuconostoc pseudomesenteroides	3L_1630239_SNP	1.04e-11	FBgn0035245	GC	gamma-glutamyl carboxylase	938	5PRIME	-	peptidyl-glutamic acid carboxylation ; GO:0017187 | inferred from direct assay <newline> protein carboxylation ; GO:0018214 | inferred from direct assay	-	gamma-glutamyl carboxylase activity ; GO:0008488 | inferred from direct assay <newline> gamma-glutamyl carboxylase activity ; GO:0008488 | inferred from sequence or structural similarity <newline> gamma-glutamyl carboxylase activity ; GO:0008488 | inferred from sequence or structural similarity with UniProtKB:Q07175	Hsap\GGCX
Leuconostoc pseudomesenteroides	3L_1630271_SNP	4.47e-08	FBgn0013342	nSyb	neuronal Synaptobrevin	77	3PRIME	-	neurotransmitter secretion ; GO:0007269 | non-traceable author statement <newline> vesicle-mediated transport ; GO:0016192 | non-traceable author statement <newline> synaptic vesicle docking involved in exocytosis ; GO:0016081 | inferred from sequence or structural similarity <newline> vesicle-mediated transport ; GO:0016192 | inferred from sequence or structural similarity <newline> vesicle fusi…	plasma membrane ; GO:0005886 | non-traceable author statement <newline> synaptic vesicle ; GO:0008021 | non-traceable author statement <newline> synaptic vesicle ; GO:0008021 | inferred from sequence or structural similarity <newline> synaptic vesicle ; GO:0008021 | inferred from direct assay <newline> plasma membrane ; GO:0005886 | inferred from direct assay <newline> terminal bouton ; GO:004319…	SNAP receptor activity ; GO:0005484 | inferred from sequence or structural similarity <newline> SNAP receptor activity ; GO:0005484 | non-traceable author statement <newline> SNARE binding ; GO:0000149 | inferred from physical interaction with Snap25, Syx1A <newline> SNAP receptor activity ; GO:0005484 | inferred from direct assay <newline> protein binding ; GO:0005515 | inferred from physical in…	Hsap\ENSG00000139190 <newline> Hsap\VAMP2 <newline> Hsap\VAMP3 <newline> Hsap\ENSG00000263620
Leuconostoc pseudomesenteroides	3L_1630271_SNP	4.47e-08	FBgn0035245	GC	gamma-glutamyl carboxylase	970	5PRIME	-	peptidyl-glutamic acid carboxylation ; GO:0017187 | inferred from direct assay <newline> protein carboxylation ; GO:0018214 | inferred from direct assay	-	gamma-glutamyl carboxylase activity ; GO:0008488 | inferred from direct assay <newline> gamma-glutamyl carboxylase activity ; GO:0008488 | inferred from sequence or structural similarity <newline> gamma-glutamyl carboxylase activity ; GO:0008488 | inferred from sequence or structural similarity with UniProtKB:Q07175	Hsap\GGCX
Leuconostoc pseudomesenteroides	3L_1630570_SNP	3.95e-11	FBgn0013342	nSyb	neuronal Synaptobrevin	0	EXON	-	neurotransmitter secretion ; GO:0007269 | non-traceable author statement <newline> vesicle-mediated transport ; GO:0016192 | non-traceable author statement <newline> synaptic vesicle docking involved in exocytosis ; GO:0016081 | inferred from sequence or structural similarity <newline> vesicle-mediated transport ; GO:0016192 | inferred from sequence or structural similarity <newline> vesicle fusi…	plasma membrane ; GO:0005886 | non-traceable author statement <newline> synaptic vesicle ; GO:0008021 | non-traceable author statement <newline> synaptic vesicle ; GO:0008021 | inferred from sequence or structural similarity <newline> synaptic vesicle ; GO:0008021 | inferred from direct assay <newline> plasma membrane ; GO:0005886 | inferred from direct assay <newline> terminal bouton ; GO:004319…	SNAP receptor activity ; GO:0005484 | inferred from sequence or structural similarity <newline> SNAP receptor activity ; GO:0005484 | non-traceable author statement <newline> SNARE binding ; GO:0000149 | inferred from physical interaction with Snap25, Syx1A <newline> SNAP receptor activity ; GO:0005484 | inferred from direct assay <newline> protein binding ; GO:0005515 | inferred from physical in…	Hsap\ENSG00000139190 <newline> Hsap\VAMP2 <newline> Hsap\VAMP3 <newline> Hsap\ENSG00000263620
Leuconostoc pseudomesenteroides	3L_1630925_SNP	2.84e-09	FBgn0013342	nSyb	neuronal Synaptobrevin	0	EXON	-	neurotransmitter secretion ; GO:0007269 | non-traceable author statement <newline> vesicle-mediated transport ; GO:0016192 | non-traceable author statement <newline> synaptic vesicle docking involved in exocytosis ; GO:0016081 | inferred from sequence or structural similarity <newline> vesicle-mediated transport ; GO:0016192 | inferred from sequence or structural similarity <newline> vesicle fusi…	plasma membrane ; GO:0005886 | non-traceable author statement <newline> synaptic vesicle ; GO:0008021 | non-traceable author statement <newline> synaptic vesicle ; GO:0008021 | inferred from sequence or structural similarity <newline> synaptic vesicle ; GO:0008021 | inferred from direct assay <newline> plasma membrane ; GO:0005886 | inferred from direct assay <newline> terminal bouton ; GO:004319…	SNAP receptor activity ; GO:0005484 | inferred from sequence or structural similarity <newline> SNAP receptor activity ; GO:0005484 | non-traceable author statement <newline> SNARE binding ; GO:0000149 | inferred from physical interaction with Snap25, Syx1A <newline> SNAP receptor activity ; GO:0005484 | inferred from direct assay <newline> protein binding ; GO:0005515 | inferred from physical in…	Hsap\ENSG00000139190 <newline> Hsap\VAMP2 <newline> Hsap\VAMP3 <newline> Hsap\ENSG00000263620
Leuconostoc pseudomesenteroides	3L_1631111_SNP	1.77e-11	FBgn0013342	nSyb	neuronal Synaptobrevin	0	EXON	-	neurotransmitter secretion ; GO:0007269 | non-traceable author statement <newline> vesicle-mediated transport ; GO:0016192 | non-traceable author statement <newline> synaptic vesicle docking involved in exocytosis ; GO:0016081 | inferred from sequence or structural similarity <newline> vesicle-mediated transport ; GO:0016192 | inferred from sequence or structural similarity <newline> vesicle fusi…	plasma membrane ; GO:0005886 | non-traceable author statement <newline> synaptic vesicle ; GO:0008021 | non-traceable author statement <newline> synaptic vesicle ; GO:0008021 | inferred from sequence or structural similarity <newline> synaptic vesicle ; GO:0008021 | inferred from direct assay <newline> plasma membrane ; GO:0005886 | inferred from direct assay <newline> terminal bouton ; GO:004319…	SNAP receptor activity ; GO:0005484 | inferred from sequence or structural similarity <newline> SNAP receptor activity ; GO:0005484 | non-traceable author statement <newline> SNARE binding ; GO:0000149 | inferred from physical interaction with Snap25, Syx1A <newline> SNAP receptor activity ; GO:0005484 | inferred from direct assay <newline> protein binding ; GO:0005515 | inferred from physical in…	Hsap\ENSG00000139190 <newline> Hsap\VAMP2 <newline> Hsap\VAMP3 <newline> Hsap\ENSG00000263620
Leuconostoc pseudomesenteroides	3L_1631116_SNP	3.02e-12	FBgn0013342	nSyb	neuronal Synaptobrevin	0	EXON	-	neurotransmitter secretion ; GO:0007269 | non-traceable author statement <newline> vesicle-mediated transport ; GO:0016192 | non-traceable author statement <newline> synaptic vesicle docking involved in exocytosis ; GO:0016081 | inferred from sequence or structural similarity <newline> vesicle-mediated transport ; GO:0016192 | inferred from sequence or structural similarity <newline> vesicle fusi…	plasma membrane ; GO:0005886 | non-traceable author statement <newline> synaptic vesicle ; GO:0008021 | non-traceable author statement <newline> synaptic vesicle ; GO:0008021 | inferred from sequence or structural similarity <newline> synaptic vesicle ; GO:0008021 | inferred from direct assay <newline> plasma membrane ; GO:0005886 | inferred from direct assay <newline> terminal bouton ; GO:004319…	SNAP receptor activity ; GO:0005484 | inferred from sequence or structural similarity <newline> SNAP receptor activity ; GO:0005484 | non-traceable author statement <newline> SNARE binding ; GO:0000149 | inferred from physical interaction with Snap25, Syx1A <newline> SNAP receptor activity ; GO:0005484 | inferred from direct assay <newline> protein binding ; GO:0005515 | inferred from physical in…	Hsap\ENSG00000139190 <newline> Hsap\VAMP2 <newline> Hsap\VAMP3 <newline> Hsap\ENSG00000263620
Leuconostoc pseudomesenteroides	3L_1631626_SNP	3.69e-08	FBgn0013342	nSyb	neuronal Synaptobrevin	0	EXON	-	neurotransmitter secretion ; GO:0007269 | non-traceable author statement <newline> vesicle-mediated transport ; GO:0016192 | non-traceable author statement <newline> synaptic vesicle docking involved in exocytosis ; GO:0016081 | inferred from sequence or structural similarity <newline> vesicle-mediated transport ; GO:0016192 | inferred from sequence or structural similarity <newline> vesicle fusi…	plasma membrane ; GO:0005886 | non-traceable author statement <newline> synaptic vesicle ; GO:0008021 | non-traceable author statement <newline> synaptic vesicle ; GO:0008021 | inferred from sequence or structural similarity <newline> synaptic vesicle ; GO:0008021 | inferred from direct assay <newline> plasma membrane ; GO:0005886 | inferred from direct assay <newline> terminal bouton ; GO:004319…	SNAP receptor activity ; GO:0005484 | inferred from sequence or structural similarity <newline> SNAP receptor activity ; GO:0005484 | non-traceable author statement <newline> SNARE binding ; GO:0000149 | inferred from physical interaction with Snap25, Syx1A <newline> SNAP receptor activity ; GO:0005484 | inferred from direct assay <newline> protein binding ; GO:0005515 | inferred from physical in…	Hsap\ENSG00000139190 <newline> Hsap\VAMP2 <newline> Hsap\VAMP3 <newline> Hsap\ENSG00000263620
Leuconostoc pseudomesenteroides	3L_1631785_SNP	2.81e-09	FBgn0013342	nSyb	neuronal Synaptobrevin	0	EXON	-	neurotransmitter secretion ; GO:0007269 | non-traceable author statement <newline> vesicle-mediated transport ; GO:0016192 | non-traceable author statement <newline> synaptic vesicle docking involved in exocytosis ; GO:0016081 | inferred from sequence or structural similarity <newline> vesicle-mediated transport ; GO:0016192 | inferred from sequence or structural similarity <newline> vesicle fusi…	plasma membrane ; GO:0005886 | non-traceable author statement <newline> synaptic vesicle ; GO:0008021 | non-traceable author statement <newline> synaptic vesicle ; GO:0008021 | inferred from sequence or structural similarity <newline> synaptic vesicle ; GO:0008021 | inferred from direct assay <newline> plasma membrane ; GO:0005886 | inferred from direct assay <newline> terminal bouton ; GO:004319…	SNAP receptor activity ; GO:0005484 | inferred from sequence or structural similarity <newline> SNAP receptor activity ; GO:0005484 | non-traceable author statement <newline> SNARE binding ; GO:0000149 | inferred from physical interaction with Snap25, Syx1A <newline> SNAP receptor activity ; GO:0005484 | inferred from direct assay <newline> protein binding ; GO:0005515 | inferred from physical in…	Hsap\ENSG00000139190 <newline> Hsap\VAMP2 <newline> Hsap\VAMP3 <newline> Hsap\ENSG00000263620
Leuconostoc pseudomesenteroides	3L_1631830_SNP	1.07e-09	FBgn0013342	nSyb	neuronal Synaptobrevin	0	EXON	-	neurotransmitter secretion ; GO:0007269 | non-traceable author statement <newline> vesicle-mediated transport ; GO:0016192 | non-traceable author statement <newline> synaptic vesicle docking involved in exocytosis ; GO:0016081 | inferred from sequence or structural similarity <newline> vesicle-mediated transport ; GO:0016192 | inferred from sequence or structural similarity <newline> vesicle fusi…	plasma membrane ; GO:0005886 | non-traceable author statement <newline> synaptic vesicle ; GO:0008021 | non-traceable author statement <newline> synaptic vesicle ; GO:0008021 | inferred from sequence or structural similarity <newline> synaptic vesicle ; GO:0008021 | inferred from direct assay <newline> plasma membrane ; GO:0005886 | inferred from direct assay <newline> terminal bouton ; GO:004319…	SNAP receptor activity ; GO:0005484 | inferred from sequence or structural similarity <newline> SNAP receptor activity ; GO:0005484 | non-traceable author statement <newline> SNARE binding ; GO:0000149 | inferred from physical interaction with Snap25, Syx1A <newline> SNAP receptor activity ; GO:0005484 | inferred from direct assay <newline> protein binding ; GO:0005515 | inferred from physical in…	Hsap\ENSG00000139190 <newline> Hsap\VAMP2 <newline> Hsap\VAMP3 <newline> Hsap\ENSG00000263620
Leuconostoc pseudomesenteroides	3L_1632260_SNP	7.14e-10	FBgn0013342	nSyb	neuronal Synaptobrevin	0	EXON	-	neurotransmitter secretion ; GO:0007269 | non-traceable author statement <newline> vesicle-mediated transport ; GO:0016192 | non-traceable author statement <newline> synaptic vesicle docking involved in exocytosis ; GO:0016081 | inferred from sequence or structural similarity <newline> vesicle-mediated transport ; GO:0016192 | inferred from sequence or structural similarity <newline> vesicle fusi…	plasma membrane ; GO:0005886 | non-traceable author statement <newline> synaptic vesicle ; GO:0008021 | non-traceable author statement <newline> synaptic vesicle ; GO:0008021 | inferred from sequence or structural similarity <newline> synaptic vesicle ; GO:0008021 | inferred from direct assay <newline> plasma membrane ; GO:0005886 | inferred from direct assay <newline> terminal bouton ; GO:004319…	SNAP receptor activity ; GO:0005484 | inferred from sequence or structural similarity <newline> SNAP receptor activity ; GO:0005484 | non-traceable author statement <newline> SNARE binding ; GO:0000149 | inferred from physical interaction with Snap25, Syx1A <newline> SNAP receptor activity ; GO:0005484 | inferred from direct assay <newline> protein binding ; GO:0005515 | inferred from physical in…	Hsap\ENSG00000139190 <newline> Hsap\VAMP2 <newline> Hsap\VAMP3 <newline> Hsap\ENSG00000263620
Leuconostoc pseudomesenteroides	3L_1632366_SNP	4.23e-06	FBgn0013342	nSyb	neuronal Synaptobrevin	0	EXON	-	neurotransmitter secretion ; GO:0007269 | non-traceable author statement <newline> vesicle-mediated transport ; GO:0016192 | non-traceable author statement <newline> synaptic vesicle docking involved in exocytosis ; GO:0016081 | inferred from sequence or structural similarity <newline> vesicle-mediated transport ; GO:0016192 | inferred from sequence or structural similarity <newline> vesicle fusi…	plasma membrane ; GO:0005886 | non-traceable author statement <newline> synaptic vesicle ; GO:0008021 | non-traceable author statement <newline> synaptic vesicle ; GO:0008021 | inferred from sequence or structural similarity <newline> synaptic vesicle ; GO:0008021 | inferred from direct assay <newline> plasma membrane ; GO:0005886 | inferred from direct assay <newline> terminal bouton ; GO:004319…	SNAP receptor activity ; GO:0005484 | inferred from sequence or structural similarity <newline> SNAP receptor activity ; GO:0005484 | non-traceable author statement <newline> SNARE binding ; GO:0000149 | inferred from physical interaction with Snap25, Syx1A <newline> SNAP receptor activity ; GO:0005484 | inferred from direct assay <newline> protein binding ; GO:0005515 | inferred from physical in…	Hsap\ENSG00000139190 <newline> Hsap\VAMP2 <newline> Hsap\VAMP3 <newline> Hsap\ENSG00000263620
Leuconostoc pseudomesenteroides	3L_1632743_SNP	1.21e-08	FBgn0013342	nSyb	neuronal Synaptobrevin	0	INTRON	-	neurotransmitter secretion ; GO:0007269 | non-traceable author statement <newline> vesicle-mediated transport ; GO:0016192 | non-traceable author statement <newline> synaptic vesicle docking involved in exocytosis ; GO:0016081 | inferred from sequence or structural similarity <newline> vesicle-mediated transport ; GO:0016192 | inferred from sequence or structural similarity <newline> vesicle fusi…	plasma membrane ; GO:0005886 | non-traceable author statement <newline> synaptic vesicle ; GO:0008021 | non-traceable author statement <newline> synaptic vesicle ; GO:0008021 | inferred from sequence or structural similarity <newline> synaptic vesicle ; GO:0008021 | inferred from direct assay <newline> plasma membrane ; GO:0005886 | inferred from direct assay <newline> terminal bouton ; GO:004319…	SNAP receptor activity ; GO:0005484 | inferred from sequence or structural similarity <newline> SNAP receptor activity ; GO:0005484 | non-traceable author statement <newline> SNARE binding ; GO:0000149 | inferred from physical interaction with Snap25, Syx1A <newline> SNAP receptor activity ; GO:0005484 | inferred from direct assay <newline> protein binding ; GO:0005515 | inferred from physical in…	Hsap\ENSG00000139190 <newline> Hsap\VAMP2 <newline> Hsap\VAMP3 <newline> Hsap\ENSG00000263620
Leuconostoc pseudomesenteroides	3L_1633154_SNP	2.27e-08	FBgn0013342	nSyb	neuronal Synaptobrevin	0	EXON	-	neurotransmitter secretion ; GO:0007269 | non-traceable author statement <newline> vesicle-mediated transport ; GO:0016192 | non-traceable author statement <newline> synaptic vesicle docking involved in exocytosis ; GO:0016081 | inferred from sequence or structural similarity <newline> vesicle-mediated transport ; GO:0016192 | inferred from sequence or structural similarity <newline> vesicle fusi…	plasma membrane ; GO:0005886 | non-traceable author statement <newline> synaptic vesicle ; GO:0008021 | non-traceable author statement <newline> synaptic vesicle ; GO:0008021 | inferred from sequence or structural similarity <newline> synaptic vesicle ; GO:0008021 | inferred from direct assay <newline> plasma membrane ; GO:0005886 | inferred from direct assay <newline> terminal bouton ; GO:004319…	SNAP receptor activity ; GO:0005484 | inferred from sequence or structural similarity <newline> SNAP receptor activity ; GO:0005484 | non-traceable author statement <newline> SNARE binding ; GO:0000149 | inferred from physical interaction with Snap25, Syx1A <newline> SNAP receptor activity ; GO:0005484 | inferred from direct assay <newline> protein binding ; GO:0005515 | inferred from physical in…	Hsap\ENSG00000139190 <newline> Hsap\VAMP2 <newline> Hsap\VAMP3 <newline> Hsap\ENSG00000263620
Leuconostoc pseudomesenteroides	3L_1633580_SNP	1.17e-06	FBgn0013342	nSyb	neuronal Synaptobrevin	0	INTRON	-	neurotransmitter secretion ; GO:0007269 | non-traceable author statement <newline> vesicle-mediated transport ; GO:0016192 | non-traceable author statement <newline> synaptic vesicle docking involved in exocytosis ; GO:0016081 | inferred from sequence or structural similarity <newline> vesicle-mediated transport ; GO:0016192 | inferred from sequence or structural similarity <newline> vesicle fusi…	plasma membrane ; GO:0005886 | non-traceable author statement <newline> synaptic vesicle ; GO:0008021 | non-traceable author statement <newline> synaptic vesicle ; GO:0008021 | inferred from sequence or structural similarity <newline> synaptic vesicle ; GO:0008021 | inferred from direct assay <newline> plasma membrane ; GO:0005886 | inferred from direct assay <newline> terminal bouton ; GO:004319…	SNAP receptor activity ; GO:0005484 | inferred from sequence or structural similarity <newline> SNAP receptor activity ; GO:0005484 | non-traceable author statement <newline> SNARE binding ; GO:0000149 | inferred from physical interaction with Snap25, Syx1A <newline> SNAP receptor activity ; GO:0005484 | inferred from direct assay <newline> protein binding ; GO:0005515 | inferred from physical in…	Hsap\ENSG00000139190 <newline> Hsap\VAMP2 <newline> Hsap\VAMP3 <newline> Hsap\ENSG00000263620
Leuconostoc pseudomesenteroides	3L_1633920_SNP	9.4e-09	FBgn0013342	nSyb	neuronal Synaptobrevin	0	INTRON	-	neurotransmitter secretion ; GO:0007269 | non-traceable author statement <newline> vesicle-mediated transport ; GO:0016192 | non-traceable author statement <newline> synaptic vesicle docking involved in exocytosis ; GO:0016081 | inferred from sequence or structural similarity <newline> vesicle-mediated transport ; GO:0016192 | inferred from sequence or structural similarity <newline> vesicle fusi…	plasma membrane ; GO:0005886 | non-traceable author statement <newline> synaptic vesicle ; GO:0008021 | non-traceable author statement <newline> synaptic vesicle ; GO:0008021 | inferred from sequence or structural similarity <newline> synaptic vesicle ; GO:0008021 | inferred from direct assay <newline> plasma membrane ; GO:0005886 | inferred from direct assay <newline> terminal bouton ; GO:004319…	SNAP receptor activity ; GO:0005484 | inferred from sequence or structural similarity <newline> SNAP receptor activity ; GO:0005484 | non-traceable author statement <newline> SNARE binding ; GO:0000149 | inferred from physical interaction with Snap25, Syx1A <newline> SNAP receptor activity ; GO:0005484 | inferred from direct assay <newline> protein binding ; GO:0005515 | inferred from physical in…	Hsap\ENSG00000139190 <newline> Hsap\VAMP2 <newline> Hsap\VAMP3 <newline> Hsap\ENSG00000263620
Leuconostoc pseudomesenteroides	3L_1634052_SNP	8.12e-07	FBgn0013342	nSyb	neuronal Synaptobrevin	0	INTRON	-	neurotransmitter secretion ; GO:0007269 | non-traceable author statement <newline> vesicle-mediated transport ; GO:0016192 | non-traceable author statement <newline> synaptic vesicle docking involved in exocytosis ; GO:0016081 | inferred from sequence or structural similarity <newline> vesicle-mediated transport ; GO:0016192 | inferred from sequence or structural similarity <newline> vesicle fusi…	plasma membrane ; GO:0005886 | non-traceable author statement <newline> synaptic vesicle ; GO:0008021 | non-traceable author statement <newline> synaptic vesicle ; GO:0008021 | inferred from sequence or structural similarity <newline> synaptic vesicle ; GO:0008021 | inferred from direct assay <newline> plasma membrane ; GO:0005886 | inferred from direct assay <newline> terminal bouton ; GO:004319…	SNAP receptor activity ; GO:0005484 | inferred from sequence or structural similarity <newline> SNAP receptor activity ; GO:0005484 | non-traceable author statement <newline> SNARE binding ; GO:0000149 | inferred from physical interaction with Snap25, Syx1A <newline> SNAP receptor activity ; GO:0005484 | inferred from direct assay <newline> protein binding ; GO:0005515 | inferred from physical in…	Hsap\ENSG00000139190 <newline> Hsap\VAMP2 <newline> Hsap\VAMP3 <newline> Hsap\ENSG00000263620
Leuconostoc pseudomesenteroides	3L_1634298_SNP	4.01e-08	FBgn0013342	nSyb	neuronal Synaptobrevin	0	INTRON	-	neurotransmitter secretion ; GO:0007269 | non-traceable author statement <newline> vesicle-mediated transport ; GO:0016192 | non-traceable author statement <newline> synaptic vesicle docking involved in exocytosis ; GO:0016081 | inferred from sequence or structural similarity <newline> vesicle-mediated transport ; GO:0016192 | inferred from sequence or structural similarity <newline> vesicle fusi…	plasma membrane ; GO:0005886 | non-traceable author statement <newline> synaptic vesicle ; GO:0008021 | non-traceable author statement <newline> synaptic vesicle ; GO:0008021 | inferred from sequence or structural similarity <newline> synaptic vesicle ; GO:0008021 | inferred from direct assay <newline> plasma membrane ; GO:0005886 | inferred from direct assay <newline> terminal bouton ; GO:004319…	SNAP receptor activity ; GO:0005484 | inferred from sequence or structural similarity <newline> SNAP receptor activity ; GO:0005484 | non-traceable author statement <newline> SNARE binding ; GO:0000149 | inferred from physical interaction with Snap25, Syx1A <newline> SNAP receptor activity ; GO:0005484 | inferred from direct assay <newline> protein binding ; GO:0005515 | inferred from physical in…	Hsap\ENSG00000139190 <newline> Hsap\VAMP2 <newline> Hsap\VAMP3 <newline> Hsap\ENSG00000263620
Leuconostoc pseudomesenteroides	3L_1634317_SNP	9.52e-07	FBgn0013342	nSyb	neuronal Synaptobrevin	0	INTRON	-	neurotransmitter secretion ; GO:0007269 | non-traceable author statement <newline> vesicle-mediated transport ; GO:0016192 | non-traceable author statement <newline> synaptic vesicle docking involved in exocytosis ; GO:0016081 | inferred from sequence or structural similarity <newline> vesicle-mediated transport ; GO:0016192 | inferred from sequence or structural similarity <newline> vesicle fusi…	plasma membrane ; GO:0005886 | non-traceable author statement <newline> synaptic vesicle ; GO:0008021 | non-traceable author statement <newline> synaptic vesicle ; GO:0008021 | inferred from sequence or structural similarity <newline> synaptic vesicle ; GO:0008021 | inferred from direct assay <newline> plasma membrane ; GO:0005886 | inferred from direct assay <newline> terminal bouton ; GO:004319…	SNAP receptor activity ; GO:0005484 | inferred from sequence or structural similarity <newline> SNAP receptor activity ; GO:0005484 | non-traceable author statement <newline> SNARE binding ; GO:0000149 | inferred from physical interaction with Snap25, Syx1A <newline> SNAP receptor activity ; GO:0005484 | inferred from direct assay <newline> protein binding ; GO:0005515 | inferred from physical in…	Hsap\ENSG00000139190 <newline> Hsap\VAMP2 <newline> Hsap\VAMP3 <newline> Hsap\ENSG00000263620
Leuconostoc pseudomesenteroides	3L_1635100_SNP	3.14e-09	FBgn0013342	nSyb	neuronal Synaptobrevin	0	INTRON	-	neurotransmitter secretion ; GO:0007269 | non-traceable author statement <newline> vesicle-mediated transport ; GO:0016192 | non-traceable author statement <newline> synaptic vesicle docking involved in exocytosis ; GO:0016081 | inferred from sequence or structural similarity <newline> vesicle-mediated transport ; GO:0016192 | inferred from sequence or structural similarity <newline> vesicle fusi…	plasma membrane ; GO:0005886 | non-traceable author statement <newline> synaptic vesicle ; GO:0008021 | non-traceable author statement <newline> synaptic vesicle ; GO:0008021 | inferred from sequence or structural similarity <newline> synaptic vesicle ; GO:0008021 | inferred from direct assay <newline> plasma membrane ; GO:0005886 | inferred from direct assay <newline> terminal bouton ; GO:004319…	SNAP receptor activity ; GO:0005484 | inferred from sequence or structural similarity <newline> SNAP receptor activity ; GO:0005484 | non-traceable author statement <newline> SNARE binding ; GO:0000149 | inferred from physical interaction with Snap25, Syx1A <newline> SNAP receptor activity ; GO:0005484 | inferred from direct assay <newline> protein binding ; GO:0005515 | inferred from physical in…	Hsap\ENSG00000139190 <newline> Hsap\VAMP2 <newline> Hsap\VAMP3 <newline> Hsap\ENSG00000263620
Leuconostoc pseudomesenteroides	3L_1635759_SNP	6.83e-09	FBgn0013342	nSyb	neuronal Synaptobrevin	0	INTRON	-	neurotransmitter secretion ; GO:0007269 | non-traceable author statement <newline> vesicle-mediated transport ; GO:0016192 | non-traceable author statement <newline> synaptic vesicle docking involved in exocytosis ; GO:0016081 | inferred from sequence or structural similarity <newline> vesicle-mediated transport ; GO:0016192 | inferred from sequence or structural similarity <newline> vesicle fusi…	plasma membrane ; GO:0005886 | non-traceable author statement <newline> synaptic vesicle ; GO:0008021 | non-traceable author statement <newline> synaptic vesicle ; GO:0008021 | inferred from sequence or structural similarity <newline> synaptic vesicle ; GO:0008021 | inferred from direct assay <newline> plasma membrane ; GO:0005886 | inferred from direct assay <newline> terminal bouton ; GO:004319…	SNAP receptor activity ; GO:0005484 | inferred from sequence or structural similarity <newline> SNAP receptor activity ; GO:0005484 | non-traceable author statement <newline> SNARE binding ; GO:0000149 | inferred from physical interaction with Snap25, Syx1A <newline> SNAP receptor activity ; GO:0005484 | inferred from direct assay <newline> protein binding ; GO:0005515 | inferred from physical in…	Hsap\ENSG00000139190 <newline> Hsap\VAMP2 <newline> Hsap\VAMP3 <newline> Hsap\ENSG00000263620
Leuconostoc pseudomesenteroides	3L_1635887_SNP	6.29e-07	FBgn0013342	nSyb	neuronal Synaptobrevin	0	INTRON	-	neurotransmitter secretion ; GO:0007269 | non-traceable author statement <newline> vesicle-mediated transport ; GO:0016192 | non-traceable author statement <newline> synaptic vesicle docking involved in exocytosis ; GO:0016081 | inferred from sequence or structural similarity <newline> vesicle-mediated transport ; GO:0016192 | inferred from sequence or structural similarity <newline> vesicle fusi…	plasma membrane ; GO:0005886 | non-traceable author statement <newline> synaptic vesicle ; GO:0008021 | non-traceable author statement <newline> synaptic vesicle ; GO:0008021 | inferred from sequence or structural similarity <newline> synaptic vesicle ; GO:0008021 | inferred from direct assay <newline> plasma membrane ; GO:0005886 | inferred from direct assay <newline> terminal bouton ; GO:004319…	SNAP receptor activity ; GO:0005484 | inferred from sequence or structural similarity <newline> SNAP receptor activity ; GO:0005484 | non-traceable author statement <newline> SNARE binding ; GO:0000149 | inferred from physical interaction with Snap25, Syx1A <newline> SNAP receptor activity ; GO:0005484 | inferred from direct assay <newline> protein binding ; GO:0005515 | inferred from physical in…	Hsap\ENSG00000139190 <newline> Hsap\VAMP2 <newline> Hsap\VAMP3 <newline> Hsap\ENSG00000263620
Leuconostoc pseudomesenteroides	3L_1636129_SNP	2.45e-06	FBgn0013342	nSyb	neuronal Synaptobrevin	0	INTRON	-	neurotransmitter secretion ; GO:0007269 | non-traceable author statement <newline> vesicle-mediated transport ; GO:0016192 | non-traceable author statement <newline> synaptic vesicle docking involved in exocytosis ; GO:0016081 | inferred from sequence or structural similarity <newline> vesicle-mediated transport ; GO:0016192 | inferred from sequence or structural similarity <newline> vesicle fusi…	plasma membrane ; GO:0005886 | non-traceable author statement <newline> synaptic vesicle ; GO:0008021 | non-traceable author statement <newline> synaptic vesicle ; GO:0008021 | inferred from sequence or structural similarity <newline> synaptic vesicle ; GO:0008021 | inferred from direct assay <newline> plasma membrane ; GO:0005886 | inferred from direct assay <newline> terminal bouton ; GO:004319…	SNAP receptor activity ; GO:0005484 | inferred from sequence or structural similarity <newline> SNAP receptor activity ; GO:0005484 | non-traceable author statement <newline> SNARE binding ; GO:0000149 | inferred from physical interaction with Snap25, Syx1A <newline> SNAP receptor activity ; GO:0005484 | inferred from direct assay <newline> protein binding ; GO:0005515 | inferred from physical in…	Hsap\ENSG00000139190 <newline> Hsap\VAMP2 <newline> Hsap\VAMP3 <newline> Hsap\ENSG00000263620
Leuconostoc pseudomesenteroides	3L_1636616_SNP	1.86e-07	FBgn0013342	nSyb	neuronal Synaptobrevin	0	INTRON	-	neurotransmitter secretion ; GO:0007269 | non-traceable author statement <newline> vesicle-mediated transport ; GO:0016192 | non-traceable author statement <newline> synaptic vesicle docking involved in exocytosis ; GO:0016081 | inferred from sequence or structural similarity <newline> vesicle-mediated transport ; GO:0016192 | inferred from sequence or structural similarity <newline> vesicle fusi…	plasma membrane ; GO:0005886 | non-traceable author statement <newline> synaptic vesicle ; GO:0008021 | non-traceable author statement <newline> synaptic vesicle ; GO:0008021 | inferred from sequence or structural similarity <newline> synaptic vesicle ; GO:0008021 | inferred from direct assay <newline> plasma membrane ; GO:0005886 | inferred from direct assay <newline> terminal bouton ; GO:004319…	SNAP receptor activity ; GO:0005484 | inferred from sequence or structural similarity <newline> SNAP receptor activity ; GO:0005484 | non-traceable author statement <newline> SNARE binding ; GO:0000149 | inferred from physical interaction with Snap25, Syx1A <newline> SNAP receptor activity ; GO:0005484 | inferred from direct assay <newline> protein binding ; GO:0005515 | inferred from physical in…	Hsap\ENSG00000139190 <newline> Hsap\VAMP2 <newline> Hsap\VAMP3 <newline> Hsap\ENSG00000263620
[truncated: 2,555 more rows]

## Sheet: Table S11C
Variant ID	Number Associated Microbial Species	Associated Microbial Species
[truncated: 268 more rows]

## Sheet: Table S11D
GO Category	GO Term	Number of Genes in GO Term (Genome)	Observed Number of Genes in GO Term (List)	Expected Number of Genes in GO Term (List)	Increase (+) or Decrease (-)	Fold Enrichment	P-value	FDR													GO cellular component complete	Drosophila melanogaster - REFLIST (13757)	upload_1 (716)	upload_1 (expected)	upload_1 (over/under)	upload_1 (fold Enrichment)	upload_1 (raw P-value)	upload_1 (FDR)
[truncated: 395 more rows]
