# Supplementary material for: Gene expression networks in the Drosophila Genetic Reference Panel
Source: HighWire-hosted journal article supplement (doi:10.1101/gr.257592.119), 2020-03-01
Supplement: Supplemental_Table_S2.xlsx.xlsx [file Supplemental_Table_S2.xlsx.xlsx]

## Sheet: Table S2A
FlyBase Gene ID	Gene Symbol	Gene Locus (Release 5)	Gene Strand (Release 5)	Gene Locus (Release 6)	Gene Strand (Release 6)	Expressed in DGRP	Mean Log2 FPKM (Females)	Mean Log2 FPKM (Males)
FBgn0000003	7SLRNA:CR32864	3R:2648220-2648518	+	3R:6822498-6822796	+	Yes	4.326	4.514
FBgn0000008	a	2R:18024473-18060339	+	2R:22136968-22172834	+	Yes	3.374	2.127
FBgn0000014	abd-A	3R:12632936-12655771	-	3R:16807214-16830049	-	Yes	0.617	1.249
FBgn0000015	Abd-B	3R:12752932-12797958	-	3R:16927210-16972236	-	Yes	-1.163	1.256
FBgn0000017	Abl	3L:16608966-16640982	-	3L:16615866-16647882	-	Yes	2.874	2.212
FBgn0000018	abo	2L:10973443-10975293	-	2L:10973443-10975293	-	Yes	4.442	2.813
FBgn0000022	ac	X:264064-264980	+	X:370031-370947	+	No	-4.182	-8.807
FBgn0000024	Ace	3R:9048673-9085239	-	3R:13222951-13259517	-	Yes	2.228	3.772
FBgn0000028	acj6	X:15244272-15273097	-	X:15350239-15379064	-	No	-3.517	-0.799
FBgn0000032	Acph-1	3R:25816866-25819133	-	3R:29991144-29993411	-	Yes	5.615	3.804
FBgn0000036	nAChRalpha1	3R:20219618-20282879	-	3R:24393896-24457157	-	Yes	-0.198	1.623
FBgn0000037	mAChR-A	2R:20266153-20277817	-	2R:24378630-24390294	-	Yes	0.331	1.868
FBgn0000038	nAChRbeta1	3L:4429349-4435993	+	3L:4429349-4435993	+	Yes	0.496	2.186
FBgn0000039	nAChRalpha2	3R:20311150-20316869	+	3R:24485428-24491147	+	Yes	0.33	2.004
FBgn0000042	Act5C	X:5794894-5799432	+	X:5900861-5905399	+	Yes	8.382	7.542
FBgn0000043	Act42A	2R:1901415-1903194	-	2R:6013910-6015689	-	Yes	7.258	6.674
FBgn0000044	Act57B	2R:16831526-16833936	+	2R:20944021-20946431	+	Yes	6.616	7.219
FBgn0000045	Act79B	3L:21978310-21980290	+	3L:21985210-21987190	+	Yes	5.923	7.853
FBgn0000046	Act87E	3R:9251705-9254097	+	3R:13425983-13428375	+	Yes	5.02	6.482
FBgn0000047	Act88F	3R:11265691-11267899	+	3R:15439969-15442177	+	Yes	5.845	6.733
FBgn0000052	ade2	2L:6041181-6046050	-	2L:6041181-6046050	-	Yes	5.605	4.826
FBgn0000053	ade3	2L:7014623-7023898	-	2L:7014623-7023898	-	Yes	5.41	4.862
FBgn0000054	Adf1	2R:2549770-2555590	+	2R:6662265-6668085	+	Yes	5.14	3.896
FBgn0000055	Adh	2L:14615552-14618902	+	2L:14615552-14618902	+	Yes	2.591	3.698
FBgn0000056	Adhr	2L:14615552-14618902	+	2L:14615552-14618902	+	No	-9.966	-9.966
FBgn0000057	adp	2R:14039209-14041565	+	2R:18151704-18154060	+	Yes	4.265	4.422
FBgn0000061	al	2L:378112-387439	+	2L:378112-387439	+	No	-3.185	-2.729
FBgn0000063	ald	3R:13496993-13499550	+	3R:17671271-17673828	+	Yes	3.394	1.411
FBgn0000064	Ald	3R:22079791-22087313	-	3R:26254069-26261591	-	Yes	8.617	9.531
FBgn0000071	Ama	3R:2588315-2590983	+	3R:6762593-6765261	+	No	-0.02	-2.705
FBgn0000075	amd	2L:19110154-19114110	+	2L:19110154-19114110	+	Yes	2.006	0.455
FBgn0000077	amx	X:9139948-9141369	-	X:9245915-9247336	-	Yes	4.322	2.753
FBgn0000078	Amy-d	2R:13012269-13013874	+	2R:17124764-17126369	+	Yes	6.629	7.14
FBgn0000079	Amy-p	2R:13006141-13007808	-	2R:17118636-17120303	-	Yes	6.815	7.296
FBgn0000083	AnxB9	3R:16890963-16896639	+	3R:21065241-21070917	+	Yes	6.746	6.842
FBgn0000084	AnxB10	X:20065478-20067547	-	X:20171445-20173514	-	Yes	5.464	5.584
FBgn0000092	CG2650	X:2586765-2587919	-	X:2692732-2693886	-	Yes	-0.238	1.023
FBgn0000094	Anp	3R:26035670-26036104	+	3R:30209948-30210382	+	Yes	-5.476	9.106
FBgn0000097	aop	2L:2156484-2178754	-	2L:2156484-2178754	-	Yes	3.518	2.832
FBgn0000099	ap	2R:1593707-1615030	-	2R:5706202-5727525	-	Yes	2.97	3.764
FBgn0000100	RpLP0	3L:22068967-22070587	+	3L:22075867-22077487	+	Yes	10.293	9.01
FBgn0000108	Appl	X:424534-473077	+	X:530501-579044	+	Yes	2.636	4.279
FBgn0000109	Aprt	3L:1883795-1885019	-	3L:1883795-1885019	-	Yes	4.05	2.78
FBgn0000114	aret	2L:12175004-12313438	+	2L:12175004-12313438	+	Yes	7.291	5.063
FBgn0000115	Arl1	3L:15976235-15977462	+	3L:15983135-15984362	+	Yes	5.832	5.02
FBgn0000116	Argk	3L:9041881-9059127	-	3L:9048781-9066027	-	Yes	8.263	9.362
FBgn0000117	arm	X:1785434-1794679	-	X:1891401-1900646	-	Yes	7.156	5.92
FBgn0000119	arr	2R:9341145-9370734	-	2R:13453640-13483229	-	Yes	3.78	3.453
FBgn0000120	Arr1	2L:18078269-18081307	+	2L:18078269-18081307	+	Yes	7.244	8.616
FBgn0000121	Arr2	3L:8640361-8642036	-	3L:8647261-8648936	-	Yes	8.686	10.036
FBgn0000137	ase	X:354780-357209	+	X:460747-463176	+	No	-4.794	-7.186
FBgn0000139	ash2	3R:20475847-20479098	+	3R:24650125-24653376	+	Yes	4.409	3.592
FBgn0000140	asp	3R:20579571-20586235	+	3R:24753849-24760513	+	Yes	5.333	2.561
FBgn0000146	aub	2L:10997819-11001476	-	2L:10997819-11001476	-	Yes	5.537	1.478
FBgn0000147	aur	3R:7788846-7790548	+	3R:11963124-11964826	+	Yes	5.494	3.941
FBgn0000150	awd	3R:27570894-27571799	-	3R:31745172-31746077	-	Yes	9.816	8.283
FBgn0000152	Axs	X:16574122-16577928	-	X:16680089-16683895	-	Yes	3.404	2.841
FBgn0000153	b	2L:13821248-13823979	+	2L:13821248-13823979	+	Yes	4.407	5.583
FBgn0000157	Dll	2R:20702345-20723190	+	2R:24814822-24835667	+	Yes	0.366	1.782
FBgn0000158	bam	3R:21068761-21070779	-	3R:25243039-25245057	-	Yes	3.99	-0.267
FBgn0000163	baz	X:17054039-17094738	+	X:17160006-17200705	+	Yes	3.586	3.288
FBgn0000166	bcd	3R:2581564-2585188	-	3R:6755842-6759466	-	Yes	4.76	-5.22
FBgn0000173	ben	X:13890378-13893838	+	X:13996345-13999805	+	Yes	6.335	5.525
FBgn0000179	bi	X:4306889-4379680	+	X:4412856-4485647	+	Yes	-1.332	-0.123
FBgn0000180	bib	2L:9984645-9995538	+	2L:9984645-9995538	+	Yes	0.018	-0.051
FBgn0000181	bic	2R:8757754-8759299	+	2R:12870249-12871794	+	Yes	9.21	7.753
FBgn0000182	BicC	2L:16042047-16048757	+	2L:16042047-16048757	+	Yes	-2.564	0.82
FBgn0000183	BicD	2L:17459605-17473215	-	2L:17459605-17473215	-	Yes	4.202	3.549
FBgn0000206	boss	3R:21787716-21792670	+	3R:25961994-25966948	+	Yes	1.781	3.203
FBgn0000210	br	X:1469165-1558902	+	X:1575132-1664869	+	Yes	-0.68	-1.635
FBgn0000212	brm	3L:15963182-15975969	-	3L:15970082-15982869	-	Yes	3.85	3.027
FBgn0000216	Brd	3L:14965767-14966298	+	3L:14972667-14973198	+	No	-2.045	-9.35
FBgn0000221	brn	X:3998375-3999824	+	X:4104342-4105791	+	Yes	3.008	2.073
FBgn0000227	Bsg25A	2L:4683052-4684461	-	2L:4683052-4684461	-	No	-2.078	-8.433
FBgn0000228	Bsg25D	2L:5271728-5278548	-	2L:5271728-5278548	-	Yes	5.145	3.89
FBgn0000229	bsk	2L:10247502-10250501	-	2L:10247502-10250501	-	Yes	4.578	5.212
FBgn0000233	btd	X:9588219-9591591	+	X:9694186-9697558	+	No	-2.733	-2.468
FBgn0000239	bur	2L:21174182-21179683	-	2L:21174182-21179683	-	Yes	6.713	5.453
FBgn0000241	bw	2R:19415328-19426022	-	2R:23527805-23538499	-	Yes	-0.129	1.025
FBgn0000244	by	3R:5353960-5358733	-	3R:9528238-9533011	-	Yes	4.018	4.83
FBgn0000246	c(3)G	3R:11615195-11618301	-	3R:15789473-15792579	-	Yes	4.537	1.743
FBgn0000247	ca	3R:25632533-25640769	+	3R:29806811-29815047	+	Yes	3.639	3.482
FBgn0000250	cact	2L:16313036-16326207	-	2L:16313036-16326207	-	Yes	6.769	5.718
FBgn0000251	cad	2L:20770731-20783135	+	2L:20770731-20783135	+	Yes	5.677	3.696
FBgn0000253	Cam	2R:8146903-8166314	+	2R:12259398-12278809	+	Yes	6.614	6.83
FBgn0000256	capu	2L:3872646-3902860	-	2L:3872646-3902860	-	Yes	3.233	4.981
FBgn0000257	car	X:19460052-19463434	+	X:19566019-19569401	+	Yes	4.324	3.045
FBgn0000259	CkIIbeta	X:11686566-11695620	+	X:11792533-11801587	+	Yes	4.79	3.566
FBgn0000261	Cat	3L:18815704-18821288	+	3L:18822604-18828188	+	Yes	7.333	8.27
FBgn0000273	Pka-C1	2L:9682315-9699297	-	2L:9682315-9699297	-	Yes	4.789	5.152
FBgn0000274	Pka-C2	3R:26521259-26522860	-	3R:30695537-30697138	-	Yes	-0.056	4.694
FBgn0000276	CecA1	3R:26036596-26036995	+	3R:30210874-30211273	+	Yes	2.313	6.085
FBgn0000277	CecA2	3R:26037878-26038290	+	3R:30212156-30212568	+	Yes	1.029	2.374
FBgn0000278	CecB	3R:26039037-26039519	-	3R:30213315-30213797	-	No	-2.091	-2.047
FBgn0000279	CecC	3R:26042206-26042660	+	3R:30216484-30216938	+	Yes	0.782	0.731
FBgn0000280	Cec-Psi1	3R:26037249-26037475	+	3R:30211527-30211753	+	No	-9.463	-8.808
FBgn0000281	Cec2	3R:26038625-26038864	+	3R:30212903-30213142	+	No	-7.422	-5.454
FBgn0000283	Cp190	3R:11096154-11100963	-	3R:15270432-15275241	-	Yes	6.277	4.404
FBgn0000286	Cf2	2L:4876891-4883107	-	2L:4876891-4883107	-	Yes	3.215	3.438
FBgn0000287	salr	2L:11358873-11373636	+	2L:11358873-11373636	+	Yes	0.095	2.365
FBgn0000289	cg	2R:10061198-10070343	+	2R:14173693-14182838	+	Yes	5.375	4.339
FBgn0000299	Cg25C	2L:5029609-5037279	+	2L:5029609-5037279	+	Yes	4.951	4.924
FBgn0000303	Cha	3R:14531223-14558066	+	3R:18705501-18732344	+	Yes	0.712	2.324
FBgn0000307	chif	2L:16342430-16352628	-	2L:16342430-16352628	-	Yes	4.043	2.808
FBgn0000308	chic	2L:5972115-5981018	-	2L:5972115-5981018	-	Yes	6.741	6.352
FBgn0000313	chp	3R:27029902-27036452	-	3R:31204180-31210730	-	Yes	4.166	5.688
FBgn0000316	cin	X:149707-152502	+	X:255674-258469	+	Yes	6.045	3.9
FBgn0000317	ck	2L:15044963-15057862	-	2L:15044963-15057862	-	Yes	4.584	3.651
FBgn0000318	cl	2L:5520135-5521382	+	2L:5520135-5521382	+	Yes	6.934	6.96
FBgn0000319	Chc	X:15722019-15729523	-	X:15827986-15835490	-	Yes	7.096	6.531
FBgn0000320	eya	2L:6527447-6546976	-	2L:6527447-6546976	-	Yes	2.558	2.492
FBgn0000326	clt	2R:17504566-17506584	-	2R:21617061-21619079	-	Yes	3.829	3.185
FBgn0000330	cm	X:6903039-6905178	-	X:7009006-7011145	-	Yes	3.945	2.839
FBgn0000337	cn	2R:3670302-3672572	-	2R:7782797-7785067	-	No	-2.548	-2.234
FBgn0000339	cni	2L:16309292-16310726	-	2L:16309292-16310726	-	Yes	5.518	5.167
FBgn0000346	comt	X:13153054-13156521	+	X:13259021-13262488	+	Yes	3.861	5.3
FBgn0000351	cort	2L:6674682-6676635	-	2L:6674682-6676635	-	Yes	5.105	-0.348
FBgn0000352	cos	2R:3269681-3274620	-	2R:7382176-7387115	-	Yes	4.359	2.387
FBgn0000355	Cp15	3L:8721581-8722166	+	3L:8728481-8729066	+	Yes	11.115	1.462
FBgn0000356	Cp16	3L:8725044-8725699	+	3L:8731944-8732599	+	Yes	8.679	-5.117
FBgn0000357	Cp18	3L:8719891-8720713	+	3L:8726791-8727613	+	Yes	8.89	-0.727
FBgn0000358	Cp19	3L:8722965-8723704	+	3L:8729865-8730604	+	Yes	8.998	-4.146
FBgn0000359	Cp36	X:8373352-8374556	+	X:8479319-8480523	+	Yes	9.694	-4.11
FBgn0000360	Cp38	X:8375870-8377344	+	X:8481837-8483311	+	Yes	8.868	-4.789
FBgn0000370	crc	2L:21310866-21319527	+	2L:21310866-21319527	+	Yes	7.717	8.062
FBgn0000376	crm	X:2628281-2632806	-	X:2734248-2738773	-	Yes	2.986	1.182
FBgn0000377	crn	X:2141627-2144016	-	X:2247594-2249983	-	Yes	4.763	3.298
FBgn0000382	csw	X:1988267-2009734	+	X:2094234-2115701	+	Yes	4.239	4.075
FBgn0000384	cta	2L:22874548-22885683	+	2L:22981816-22992951	+	Yes	5.341	3.756
FBgn0000392	cup	2L:6663664-6674780	+	2L:6663664-6674780	+	No	-9.966	-9.966
FBgn0000394	cv	X:5584035-5587117	+	X:5690002-5693084	+	Yes	4.361	3.726
FBgn0000395	cv-2	2R:17242520-17266969	-	2R:21355015-21379464	-	Yes	1.962	2.781
FBgn0000404	CycA	3L:11819819-11826678	-	3L:11826719-11833578	-	Yes	8.979	3.828
FBgn0000405	CycB	2R:18691026-18694453	-	2R:22803521-22806948	-	Yes	9.059	3.996
FBgn0000406	Cyt-b5-r	2L:16788774-16790721	-	2L:16788774-16790721	-	Yes	7.569	8.124
FBgn0000409	Cyt-c-p	2L:16719932-16722644	+	2L:16719932-16722644	+	Yes	8.997	9.349
FBgn0000411	D	3L:14168710-14171720	-	3L:14175610-14178620	-	Yes	0.174	1.623
FBgn0000412	D1	3R:5063805-5066376	-	3R:9238083-9240654	-	Yes	6.851	5.414
FBgn0000413	da	2L:10388105-10393228	+	2L:10388105-10393228	+	Yes	5.388	4.198
FBgn0000414	Dab	3L:16705226-16717675	+	3L:16712126-16724575	+	Yes	3.117	3.145
FBgn0000416	Sap-r	3R:26709186-26714784	-	3R:30883464-30889062	-	Yes	8.635	8.652
FBgn0000422	Ddc	2L:19116483-19120306	-	2L:19116483-19120306	-	Yes	3.37	4.717
FBgn0000426	SmF	2R:8071349-8071815	-	2R:12183844-12184310	-	Yes	6.23	3.977
FBgn0000427	2019-12-01	X:7761194-7767255	-	X:7867161-7873222	-	Yes	7.062	-1.833
FBgn0000439	Dfd	3R:2617558-2628150	+	3R:6791836-6802428	+	Yes	0.035	1.081
FBgn0000442	Pkg21D	2L:786153-790798	-	2L:786153-790798	-	Yes	1.709	2.56
FBgn0000447	Dhod	3R:4477113-4478638	-	3R:8651391-8652916	-	Yes	5.744	6.325
FBgn0000448	Hr46	2R:6091500-6124853	-	2R:10203995-10237348	-	No	-2.799	-1.599
FBgn0000449	dib	3L:4062292-4064551	+	3L:4062292-4064551	+	No	0.385	-5.259
FBgn0000451	ect	3L:10183376-10194937	-	3L:10190276-10201837	-	Yes	0.022	0.409
FBgn0000454	Dip-B	3R:9608010-9611398	+	3R:13782288-13785676	+	Yes	7.434	5.87
FBgn0000455	Dip-C	3R:8237531-8239481	-	3R:12411809-12413759	-	Yes	5.156	4.875
FBgn0000459	disco	X:16104631-16110783	-	X:16210598-16216750	-	Yes	-0.441	0.658
FBgn0000463	Dl	3R:15128453-15151939	-	3R:19302731-19326217	-	Yes	4.437	1.521
FBgn0000464	Lar	2L:19586623-19732069	+	2L:19586623-19732069	+	Yes	3.011	3.22
FBgn0000473	Cyp6a2	2R:2667254-2668996	-	2R:6779749-6781491	-	Yes	4.113	5.722
FBgn0000477	DNaseII	3R:13845097-13846883	+	3R:18019375-18021161	+	Yes	4.645	5.164
FBgn0000479	dnc	X:3070473-3237800	+	X:3176440-3343767	+	Yes	2.318	2.799
FBgn0000482	dor	X:1559085-1562484	+	X:1665052-1668451	+	Yes	3.402	2.726
FBgn0000489	Pka-C3	3L:15918905-15947897	-	3L:15925805-15954797	-	Yes	3.861	5.408
FBgn0000490	dpp	2L:2428372-2459823	+	2L:2428372-2459823	+	Yes	1.703	2.655
FBgn0000492	Dr	3R:25382108-25390966	+	3R:29556386-29565244	+	Yes	0.703	1.964
FBgn0000497	ds	2L:640013-714983	-	2L:640013-714983	-	Yes	0.025	1.279
FBgn0000499	dsh	X:11249914-11252757	+	X:11355881-11358724	+	Yes	4.524	4.092
FBgn0000500	Dsk	3R:15414-15982	-	3R:4189692-4190260	-	Yes	2.36	3.934
FBgn0000504	dsx	3R:3750045-3793130	-	3R:7924323-7967408	-	Yes	2.159	3.609
FBgn0000520	dwg	X:2621731-2624075	+	X:2727698-2730042	+	Yes	4.236	2.418
FBgn0000524	dx	X:6428032-6432608	+	X:6533999-6538575	+	Yes	4.307	1.467
FBgn0000527	e	3R:17055561-17062899	-	3R:21229839-21237177	-	Yes	1.321	2.996
FBgn0000529	bsh	2L:19765776-19769067	-	2L:19765776-19769067	-	No	-2.754	-1.115
FBgn0000533	ea	3R:11154451-11156130	+	3R:15328729-15330408	+	Yes	4.635	2.496
FBgn0000535	eag	X:14849510-14904022	+	X:14955477-15009989	+	Yes	-1.067	0.586
FBgn0000536	eas	X:16172361-16179651	+	X:16278328-16285618	+	Yes	4.903	5.072
FBgn0000541	E(bx)	3L:233926-246912	-	3L:233926-246912	-	Yes	5.657	4.521
FBgn0000542	ec	X:3705731-3751654	+	X:3811698-3857621	+	Yes	0.544	0.768
FBgn0000543	ecd	3L:2263581-2265857	-	3L:2263581-2265857	-	Yes	4.535	3.673
FBgn0000546	EcR	2R:1975378-2056592	-	2R:6087873-6169087	-	Yes	3.114	2.671
FBgn0000547	ed	2L:4031377-4115749	+	2L:4031377-4115749	+	Yes	4.871	3.986
FBgn0000551	Edg78E	3L:21289863-21290903	-	3L:21296763-21297803	-	No	-4.33	-1.932
FBgn0000552	Edg84A	3R:2510173-2510855	+	3R:6684451-6685133	+	No	-8.478	-7.763
FBgn0000556	Ef1alpha48D	2R:7778640-7783267	+	2R:11891135-11895762	+	Yes	11.846	10.689
FBgn0000557	Ef1alpha100E	3R:27564190-27569028	+	3R:31738468-31743306	+	Yes	5.291	6.84
FBgn0000559	EF2	2L:21677913-21682164	-	2L:21677913-21682164	-	Yes	10.694	9.848
FBgn0000560	eg	3L:21801803-21810700	+	3L:21808703-21817600	+	Yes	-2.326	0.497
FBgn0000562	egl	2R:19622427-19634352	-	2R:23734904-23746829	-	Yes	5.19	4.572
FBgn0000564	Eh	3R:13272364-13274580	-	3R:17446642-17448858	-	No	-5.5	-4.995
FBgn0000565	Eip71CD	3L:15504152-15506302	+	3L:15511052-15513202	+	Yes	5.664	5.818
FBgn0000566	Eip55E	2R:14515423-14516900	+	2R:18627918-18629395	+	Yes	6.512	5.177
FBgn0000567	Eip74EF	3L:17551772-17612425	-	3L:17558672-17619325	-	Yes	0.846	1.599
FBgn0000568	Eip75B	3L:17944053-18057796	-	3L:17950953-18064696	-	Yes	2.74	3.113
FBgn0000575	emc	3L:749400-753492	+	3L:749400-753492	+	Yes	5.443	5.368
FBgn0000576	ems	3R:9727575-9730342	+	3R:13901853-13904620	+	Yes	-2.104	-0.924
FBgn0000577	en	2R:7411511-7415715	-	2R:11524006-11528210	-	Yes	-1.917	0.612
FBgn0000578	ena	2R:15029137-15051210	+	2R:19141632-19163705	+	Yes	3.572	2.541
FBgn0000579	Eno	2L:1724768-1729636	-	2L:1724768-1729636	-	Yes	8.124	8.326
FBgn0000581	E(Pc)	2R:7339548-7352775	+	2R:11452043-11465270	+	Yes	4.362	3.268
FBgn0000588	esc	2L:11827204-11829405	-	2L:11827204-11829405	-	Yes	4.948	1.442
FBgn0000591	E(spl)m8-HLH	3R:21865962-21866730	+	3R:26040240-26041008	+	No	-4.149	-8.453
FBgn0000592	Est-6	3L:12181918-12183805	+	3L:12188818-12190705	+	Yes	6.345	9.105
FBgn0000594	Est-P	3L:12183833-12185628	+	3L:12190733-12192528	+	Yes	-1.972	0.064
FBgn0000606	eve	2R:5866824-5868300	+	2R:9979319-9980795	+	No	-8.092	-8.732
FBgn0000611	exd	X:15886501-15890542	+	X:15992468-15996509	+	Yes	6.2	5.42
FBgn0000615	exu	2R:16554932-16558588	-	2R:20667427-20671083	-	Yes	7.627	8.272
FBgn0000617	e(y)1	X:17736194-17737381	+	X:17842161-17843348	+	Yes	3.801	2.052
FBgn0000618	e(y)2	X:11470151-11470653	-	X:11576118-11576620	-	Yes	4.794	3.411
FBgn0000625	eyg	3L:12455637-12461121	-	3L:12462537-12468021	-	Yes	-1.242	0.446
FBgn0000629	E(z)	3L:10627675-10631230	-	3L:10634575-10638130	-	Yes	5.057	3.347
FBgn0000633	fas	2R:9510549-9636872	+	2R:13623044-13749367	+	Yes	0.385	1.945
FBgn0000635	Fas2	X:4026920-4100126	-	X:4132887-4206093	-	Yes	3.488	4.002
FBgn0000636	Fas3	2L:18320102-18393441	+	2L:18320102-18393441	+	Yes	3.132	3.268
FBgn0000639	Fbp1	3L:14087689-14091153	-	3L:14094589-14098053	-	No	-4.19	-3.829
FBgn0000640	Fbp2	2L:9426784-9427917	+	2L:9426784-9427917	+	No	-3.997	-2.103
FBgn0000644	Fcp3C	X:3067409-3068507	-	X:3173376-3174474	-	Yes	5.068	-0.85
FBgn0000658	fj	2R:14120266-14123816	+	2R:18232761-18236311	+	Yes	-0.317	0.224
FBgn0000659	fkh	3R:24406698-24410986	-	3R:28580976-28585264	-	Yes	1.15	2.153
FBgn0000662	fl(2)d	2R:9707129-9712058	-	2R:13819624-13824553	-	Yes	5.302	4.047
FBgn0000667	Actn	X:1917855-1936344	-	X:2023822-2042311	-	Yes	5.603	6.295
FBgn0000709	fliI	X:21210768-21216115	+	X:21339741-21345088	+	Yes	3.482	2.222
FBgn0000711	flw	X:10279993-10303850	+	X:10385960-10409817	+	Yes	4.442	4.678
FBgn0000715	FMRFa	2R:5793799-5797962	+	2R:9906294-9910457	+	Yes	1.291	2.696
FBgn0000719	fog	X:22226153-22257030	-	X:22824317-22855194	-	Yes	4.483	3.022
FBgn0000721	for	2L:3622074-3656953	-	2L:3622074-3656953	-	Yes	6.007	5.309
FBgn0000723	FER	3R:5193325-5220268	-	3R:9367603-9394546	-	Yes	3.508	4.688
FBgn0000808	gd	X:11879567-11881797	-	X:11985534-11987764	-	Yes	2.491	-1.6
FBgn0000810	fs(1)K10	X:2136171-2140074	+	X:2242138-2246041	+	Yes	3.83	2.341
FBgn0000826	png	X:1250521-1251634	-	X:1356488-1357601	-	Yes	5.188	-1.34
FBgn0000927	fs(1)Ya	X:2618319-2620610	+	X:2724286-2726577	+	Yes	6.721	-0.94
FBgn0000928	fs(1)Yb	X:2614501-2618191	+	X:2720468-2724158	+	Yes	-0.127	-0.36
FBgn0000964	tj	2L:19464267-19467758	+	2L:19464267-19467758	+	Yes	3.002	-0.572
FBgn0000996	dup	2R:11264124-11268493	-	2R:15376619-15380988	-	Yes	5.766	1.3
FBgn0001075	ft	2L:4198404-4221796	-	2L:4198404-4221796	-	Yes	-0.379	0.934
FBgn0001077	ftz	3R:2690046-2691966	+	3R:6864324-6866244	+	No	-6.83	-1.712
FBgn0001078	ftz-f1	3L:18743707-18794409	-	3L:18750607-18801309	-	Yes	4.847	3.487
FBgn0001079	fu	X:18551788-18555237	+	X:18657755-18661204	+	Yes	4.038	1.986
FBgn0001083	fw	X:11886948-11897947	-	X:11992915-12003914	-	Yes	-0.039	1.261
FBgn0001084	fy	2L:8401476-8403280	-	2L:8401476-8403280	-	Yes	3.5	1.487
FBgn0001085	fz	3L:14267443-14361739	+	3L:14274343-14368639	+	Yes	4.71	2.289
FBgn0001086	fzy	2L:16310956-16313097	+	2L:16310956-16313097	+	Yes	5.981	3.03
FBgn0001087	g	X:13621237-13630311	-	X:13727204-13736278	-	Yes	4.731	3.345
FBgn0001089	Gal	2L:6003574-6006827	-	2L:6003574-6006827	-	Yes	4.439	5.121
FBgn0001090	bnb	X:18688279-18691720	-	X:18794246-18797687	-	Yes	1.894	2.914
FBgn0001091	Gapdh1	2R:3679406-3680885	-	2R:7791901-7793380	-	Yes	9.178	9.656
FBgn0001092	Gapdh2	X:15762178-15763694	+	X:15868145-15869661	+	Yes	9.574	8.777
FBgn0001098	Gdh	3R:19761680-19768823	-	3R:23935958-23943101	-	Yes	6.331	6.351
FBgn0001099	gdl	3L:15502545-15504147	+	3L:15509445-15511047	+	Yes	1.327	3.695
FBgn0001104	Galphai	3L:6965850-6973144	-	3L:6972750-6980044	-	Yes	6.516	4.234
FBgn0001105	Gbeta13F	X:15754148-15760208	+	X:15860115-15866175	+	Yes	6.142	5.581
FBgn0001108	Gl	3L:13922487-13927756	+	3L:13929387-13934656	+	Yes	5.471	4.631
FBgn0001112	Gld	3R:3077785-3091425	-	3R:7252063-7265703	-	Yes	1.442	5.448
FBgn0001114	Glt	2L:8672698-8676804	+	2L:8672698-8676804	+	Yes	5.006	5.432
FBgn0001120	gnu	3L:14795480-14796460	-	3L:14802380-14803360	-	Yes	7.123	-3.362
FBgn0001122	Galphao	2R:6325490-6353206	+	2R:10437985-10465701	+	Yes	3.707	3.868
FBgn0001123	Galphas	2R:19830061-19834459	+	2R:23942538-23946936	+	Yes	4.449	5.298
FBgn0001124	Got1	2R:12025857-12029433	+	2R:16138352-16141928	+	Yes	7.145	7.889
FBgn0001125	Got2	2L:1984512-1987758	-	2L:1984512-1987758	-	Yes	7.584	7.463
FBgn0001128	Gpdh	2L:5943643-5948968	+	2L:5943643-5948968	+	Yes	7.206	7.7
FBgn0001133	grau	2R:16897269-16899426	-	2R:21009764-21011921	-	Yes	4.567	3.51
FBgn0001134	Grd	3L:17816433-17832867	+	3L:17823333-17839767	+	Yes	-1.729	-0.231
FBgn0001137	grk	2L:8431086-8433598	-	2L:8431086-8433598	-	Yes	3.738	3.381
FBgn0001138	grn	3R:3973090-4007166	-	3R:8147368-8181444	-	Yes	-0.751	0.43
FBgn0001139	gro	3R:21867458-21875633	+	3R:26041736-26049911	+	Yes	5.569	4.222
FBgn0001142	Gs1	2L:132077-134472	+	2L:132077-134472	+	Yes	7.013	5.871
FBgn0001145	Gs2	X:11316865-11324230	+	X:11422832-11430197	+	Yes	6.315	7.42
FBgn0001147	gsb-n	2R:20927906-20939854	-	2R:25040383-25052331	-	Yes	-3.876	1.451
FBgn0001148	gsb	2R:20949487-20952166	+	2R:25061964-25064643	+	Yes	-3.41	0.047
FBgn0001149	GstD1	3R:8193539-8194990	-	3R:12367817-12369268	-	Yes	8.35	7.93
FBgn0001150	gt	X:2321146-2323000	-	X:2427113-2428967	-	No	-2.374	-1.681
FBgn0001168	h	3L:8668859-8672353	+	3L:8675759-8679253	+	Yes	3.904	4.791
FBgn0001169	H	3R:16447660-16454637	+	3R:20621938-20628915	+	Yes	3.039	1.835
FBgn0001170	H2.0	2L:6013059-6019402	-	2L:6013059-6019402	-	No	-2.998	-1.997
FBgn0001174	halo	2L:1517533-1518148	-	2L:1517533-1518148	-	No	-1.094	-7.223
FBgn0001179	hay	3L:10624179-10627069	+	3L:10631079-10633969	+	Yes	4.307	2.867
FBgn0001180	hb	3R:4516702-4523544	-	3R:8690980-8697822	-	Yes	4.007	0.565
FBgn0001185	her	2L:16677185-16679691	+	2L:16677185-16679691	+	Yes	3.714	2.819
FBgn0001186	Hex-A	X:9479708-9483846	+	X:9585675-9589813	+	Yes	5.519	5.956
FBgn0001187	Hex-C	2R:11106342-11107834	-	2R:15218837-15220329	-	Yes	5.922	6.937
FBgn0001189	hfw	X:1563603-1567641	+	X:1669570-1673608	+	Yes	3.829	3.772
FBgn0001197	His2Av	3R:22692651-22694942	+	3R:26866929-26869220	+	Yes	8.396	5.322
FBgn0001202	hk	2L:19030844-19033498	-	2L:19030844-19033498	-	Yes	5.089	4.418
FBgn0001206	Hmr	X:10484953-10489888	-	X:10590920-10595855	-	Yes	3.241	0.994
FBgn0001208	Hn	3L:7753553-7756266	+	3L:7760453-7763166	+	Yes	5.695	6.202
FBgn0001215	Hrb98DE	3R:24425556-24431499	+	3R:28599834-28605777	+	Yes	6.652	5.922
FBgn0001216	Hsc70-1	3L:13967161-13970861	+	3L:13974061-13977761	+	Yes	3.922	5.77
FBgn0001217	Hsc70-2	3R:8870481-8873110	+	3R:13044759-13047388	+	Yes	0.063	6.447
FBgn0001218	Hsc70-3	X:11695729-11701150	-	X:11801696-11807117	-	Yes	7.78	7.362
FBgn0001220	Hsc70-5	2R:10140103-10143697	-	2R:14252598-14256192	-	Yes	7.006	6.694
FBgn0001222	Hsf	2R:14017808-14022139	-	2R:18130303-18134634	-	Yes	6.35	4.727
FBgn0001223	Hsp22	3L:9366031-9368064	+	3L:9372931-9374964	+	No	-9.966	-9.966
FBgn0001224	Hsp23	3L:9374982-9375865	+	3L:9381882-9382765	+	Yes	3.454	5.243
FBgn0001225	Hsp26	3L:9369518-9370527	-	3L:9376418-9377427	-	Yes	9.48	6.361
FBgn0001226	Hsp27	3L:9377163-9378794	+	3L:9384063-9385694	+	Yes	6.842	4.008
FBgn0001227	Hsp67Ba	3L:9370902-9372634	-	3L:9377802-9379534	-	Yes	0.152	2.307
FBgn0001228	Hsp67Bb	3L:9365822-9368064	+	3L:9372722-9374964	+	Yes	-5.918	2.437
FBgn0001229	Hsp67Bc	3L:9364611-9365597	-	3L:9371511-9372497	-	Yes	0.349	1.541
FBgn0001230	Hsp68	3R:19880802-19883032	-	3R:24055080-24057310	-	Yes	2.338	4.696
FBgn0001233	Hsp83	3L:3192969-3197059	+	3L:3192969-3197059	+	Yes	10.203	8.582
FBgn0001234	Hsromega	3R:17121849-17143558	+	3R:21296127-21317836	+	Yes	5.22	6.215
FBgn0001235	hth	3R:6333283-6465290	-	3R:10507561-10639568	-	Yes	2.346	3.395
FBgn0001247	Ide	3L:20364772-20368996	-	3L:20371672-20375896	-	Yes	5.042	5.076
FBgn0001248	Idh	3L:8349504-8354006	-	3L:8356404-8360906	-	Yes	7.5	7.769
FBgn0001250	if	X:16646222-16677467	-	X:16752189-16783434	-	Yes	3.941	5.016
FBgn0001253	ImpE1	3L:8365505-8384271	+	3L:8372405-8391171	+	No	-2.672	-2.2
FBgn0001254	ImpE2	3L:3510974-3512681	-	3L:3510974-3512681	-	No	-1.603	-5.584
FBgn0001255	ImpE3	3R:3854175-3855268	-	3R:8028453-8029546	-	Yes	0.564	0.808
FBgn0001256	ImpL1	3L:13375865-13377099	+	3L:13382765-13383999	+	No	-1.694	-3.794
FBgn0001257	ImpL2	3L:4224006-4236147	-	3L:4224006-4236147	-	Yes	2.572	3.472
FBgn0001258	ImpL3	3L:6252205-6255794	-	3L:6259105-6262694	-	Yes	3.293	4.219
FBgn0001259	in	3L:20360298-20363359	+	3L:20367198-20370259	+	Yes	-0.758	0.374
FBgn0001263	inaD	2R:18743211-18746317	-	2R:22855688-22858794	-	Yes	3.97	5.405
FBgn0001269	inv	2R:7361970-7397200	+	2R:11474465-11509695	+	Yes	-1.865	0.88
FBgn0001276	ix	2R:7246942-7247668	-	2R:11359437-11360163	-	Yes	4.309	2.576
FBgn0001280	janA	3R:25864344-25865255	-	3R:30038622-30039533	-	Yes	5.968	5.985
FBgn0001281	janB	3R:25863706-25864450	-	3R:30037984-30038728	-	Yes	-2.627	8.202
FBgn0001285	Jon44E	2R:4578953-4580349	+	2R:8691448-8692844	+	Yes	3.035	2.229
FBgn0001291	Jra	2R:5983985-5986061	+	2R:10096480-10098556	+	Yes	5.343	4.935
FBgn0001296	kar	3R:8507908-8515089	-	3R:12682186-12689367	-	Yes	4.573	3.231
FBgn0001297	kay	3R:25591717-25619835	+	3R:29765995-29794113	+	Yes	4.164	4.981
FBgn0001301	kel	2L:18129884-18138083	-	2L:18129884-18138083	-	Yes	4.109	3.866
FBgn0001308	Khc	2R:12154465-12159476	-	2R:16266960-16271971	-	Yes	6.415	5.417
FBgn0001311	kkv	3R:1203815-1218588	-	3R:5378093-5392866	-	Yes	-1.148	0.464
FBgn0001313	kl-2	YHet:81209-148249	+	Y:596995-664173	+	Yes	-9.251	1.376
FBgn0001314	kl-3	YHet:34290-65839	+	Y:489143-561196	+	Yes	-9.219	2.1
FBgn0001315	kl-5	YHet:311-33413	+	Y:27876-129007	-	Yes	-9.125	2.49
FBgn0001316	klar	3L:434083-540614	-	3L:434083-540614	-	Yes	4.968	4.071
FBgn0001319	kn	2R:10660155-10694566	-	2R:14772650-14807061	-	Yes	-1.802	-0.754
FBgn0001320	kni	3L:20685430-20688478	-	3L:20692330-20695378	-	Yes	0.29	1.552
FBgn0001321	knk	3R:5948087-5951386	-	3R:10122365-10125664	-	Yes	0.08	1.278
FBgn0001323	knrl	3L:20590241-20613759	-	3L:20597141-20620659	-	Yes	0.492	1.694
FBgn0001324	kto	3L:19829714-19838044	+	3L:19836614-19844944	+	Yes	2.661	2.545
FBgn0001325	Kr	2R:21114134-21118917	+	2R:25226611-25231394	+	Yes	-1.833	-1.464
FBgn0001330	kz	X:2131891-2136068	-	X:2237858-2242035	-	Yes	3.812	1.153
FBgn0001332	L	2R:10368692-10384817	+	2R:14481187-14497312	+	Yes	3.811	2.871
FBgn0001341	l(1)1Bi	X:523806-527666	+	X:629773-633633	+	Yes	5.009	2.147
FBgn0001404	egh	X:2482536-2493144	+	X:2588503-2599111	+	Yes	4.218	4.178
FBgn0001491	l(1)10Bb	X:11218327-11219341	-	X:11324294-11325308	-	Yes	5.714	4.79
FBgn0001565	Hlc	X:21256545-21258973	-	X:21385518-21387946	-	Yes	6.563	5.323
FBgn0001612	Grip91	X:13630603-13638716	-	X:13736570-13744683	-	Yes	4.323	2.434
FBgn0001624	dlg1	X:11263698-11303809	+	X:11369665-11409776	+	Yes	4.191	4.332
FBgn0001941	ifc	2L:5986348-5988854	+	2L:5986348-5988854	+	Yes	6.088	5.251
FBgn0001942	eIF-4a	2L:5981764-5985909	+	2L:5981764-5985909	+	Yes	9.535	8.915
FBgn0001961	Arpc1	2L:13827941-13829741	-	2L:13827941-13829741	-	Yes	5.216	5.001
FBgn0001965	Sos	2L:13813816-13819826	+	2L:13813816-13819826	+	Yes	3.545	2.844
FBgn0001967	NimC3	2L:14019357-14020208	-	2L:14019357-14020208	-	No	-5.846	-3.244
FBgn0001970	Pgant35A	2L:14359252-14361411	+	2L:14359252-14361411	+	Yes	4.201	2.632
FBgn0001974	l(2)35Bd	2L:15009939-15011764	+	2L:15009939-15011764	+	Yes	4.801	3.012
FBgn0001977	CIAPIN1	2L:15036293-15038861	-	2L:15036293-15038861	-	Yes	4.534	4.277
FBgn0001978	stc	2L:15113480-15118069	+	2L:15113480-15118069	+	Yes	5.479	4.203
FBgn0001981	esg	2L:15333866-15336138	+	2L:15333866-15336138	+	Yes	0.25	1.301
FBgn0001983	wor	2L:15423297-15425580	-	2L:15423297-15425580	-	No	-3.295	-6.382
FBgn0001986	l(2)35Df	2L:15752263-15755900	+	2L:15752263-15755900	+	Yes	4.716	3.14
FBgn0001987	Gli	2L:15756002-15762758	-	2L:15756002-15762758	-	Yes	3.261	3.472
FBgn0001989	l(2)35Di	2L:15749319-15751078	-	2L:15749319-15751078	-	Yes	6.489	6.878
FBgn0001990	wek	2L:15766133-15768349	-	2L:15766133-15768349	-	Yes	4.344	2.669
FBgn0001991	Ca-alpha1D	2L:16165831-16190540	+	2L:16165831-16190540	+	Yes	1.986	3.743
FBgn0001992	Cyp303a1	2L:16294183-16296969	+	2L:16294183-16296969	+	No	-4.644	-2.512
FBgn0001994	crp	2L:16263556-16287730	-	2L:16263556-16287730	-	Yes	4.799	3.922
FBgn0001995	mRpL4	2L:16328059-16329132	-	2L:16328059-16329132	-	Yes	5.494	4.312
FBgn0002021	l(2)37Bb	2L:19049843-19051612	-	2L:19049843-19051612	-	Yes	4.55	3.964
FBgn0002022	Catsup	2L:19041862-19043614	+	2L:19041862-19043614	+	Yes	5.648	5.553
FBgn0002023	Lim3	2L:19079256-19108427	-	2L:19079256-19108427	-	Yes	-0.611	1.394
FBgn0002031	l(2)37Cc	2L:19121345-19123869	-	2L:19121345-19123869	-	Yes	6.288	5.117
FBgn0002036	CG10561	2L:19114401-19116570	+	2L:19114401-19116570	+	Yes	3.986	5.933
FBgn0002044	swm	2L:19493251-19497978	+	2L:19493251-19497978	+	Yes	5.032	4.086
FBgn0002069	Aats-asp	2R:8764509-8770673	+	2R:12877004-12883168	+	Yes	6.665	5.251
FBgn0002121	l(2)gl	2L:9839-21376	-	2L:9839-21376	-	Yes	6.42	5.247
FBgn0002174	l(2)tid	2R:19594436-19596549	+	2R:23706913-23709026	+	Yes	5.027	5.532
FBgn0002183	dre4	3L:1871574-1876312	-	3L:1871574-1876312	-	Yes	6.009	3.848
FBgn0002283	l(3)73Ah	3L:16581575-16583232	+	3L:16588475-16590132	+	Yes	5.637	3.829
FBgn0002284	Prosbeta6	3L:16602500-16603518	-	3L:16609400-16610418	-	Yes	7.47	6.903
FBgn0002306	sas	3R:2988600-3009424	+	3R:7162878-7183702	+	Yes	1.288	2.773
FBgn0002354	l(3)87Df	3R:8856635-8857320	+	3R:13030913-13031598	+	Yes	4.896	4.31
FBgn0002413	dco	3R:26879807-26886932	-	3R:31054085-31061210	-	Yes	6.241	4.14
FBgn0002431	hyd	3R:5540345-5551337	-	3R:9714623-9725615	-	Yes	5.629	5.102
FBgn0002440	l(3)mbn	3L:6117034-6121907	-	3L:6123934-6128807	-	No	-5.725	-3.533
FBgn0002441	l(3)mbt	3R:23092048-23098995	-	3R:27266326-27273273	-	Yes	3.68	2.704
FBgn0002466	sti	3L:12501098-12507915	-	3L:12507998-12514815	-	Yes	4.958	1.402
FBgn0002521	pho	4:1193095-1202254	-	4:1172469-1181628	-	Yes	6.312	5.307
FBgn0002522	lab	3R:2487149-2504312	-	3R:6661427-6678590	-	Yes	-1.524	-0.42
FBgn0002524	lace	2L:15499127-15505018	+	2L:15499127-15505018	+	Yes	5.595	4.141
FBgn0002525	Lam	2L:5542480-5546642	+	2L:5542480-5546642	+	Yes	5.69	4.067
FBgn0002526	LanA	3L:6196931-6211122	-	3L:6203831-6218022	-	Yes	4.344	3.551
FBgn0002531	Lcp1	2R:4317620-4318748	-	2R:8430115-8431243	-	No	-6.907	-6.354
FBgn0002533	Lcp2	2R:4321302-4322290	-	2R:8433797-8434785	-	No	-8.675	-8.39
FBgn0002534	Lcp3	2R:4322815-4323600	+	2R:8435310-8436095	+	No	-4.305	-4.15
FBgn0002535	Lcp4	2R:4325152-4326000	+	2R:8437647-8438495	+	No	-5.964	-6.305
FBgn0002542	lds	3R:3746153-3750213	+	3R:7920431-7924491	+	Yes	5.974	3.184
FBgn0002543	lea	2L:1380086-1420453	-	2L:1380086-1420453	-	Yes	0.732	1.195
FBgn0002552	lin	2R:4802029-4805739	+	2R:8914524-8918234	+	Yes	3.859	2.17
FBgn0002561	l(1)sc	X:303754-304850	+	X:409721-410817	+	No	-2.59	-9.333
FBgn0002562	Lsp1alpha	X:12384324-12387015	+	X:12490291-12492982	+	No	-3.004	-2.602
FBgn0002563	Lsp1beta	2L:898500-901316	+	2L:898500-901316	+	Yes	1.292	1.998
FBgn0002564	Lsp1gamma	3L:66430-68995	+	3L:66430-68995	+	Yes	-0.194	0.893
FBgn0002565	Lsp2	3L:12122493-12124969	+	3L:12129393-12131869	+	Yes	4.723	4.077
FBgn0002566	lt	2L:22817527-22835867	+	2L:22924795-22943135	+	Yes	4.702	4.501
FBgn0002567	ltd	2R:5065369-5073847	-	2R:9177864-9186342	-	Yes	5.191	4.405
FBgn0002569	Mal-A2	2R:4341132-4343287	+	2R:8453627-8455782	+	Yes	4.792	5.54
FBgn0002570	Mal-A1	2R:4337169-4339409	-	2R:8449664-8451904	-	Yes	8.222	9.528
FBgn0002571	Mal-A3	2R:4343414-4345397	-	2R:8455909-8457892	-	Yes	4.6	5.54
FBgn0002573	sens	3L:13389328-13394225	-	3L:13396228-13401125	-	Yes	-1.577	0.13
FBgn0002576	lz	X:9178682-9197669	+	X:9284649-9303636	+	Yes	-1.385	-0.599
FBgn0002577	m	X:11648306-11663541	+	X:11754273-11769508	+	No	-1.538	-1.579
FBgn0002578	Kaz-m1	3R:21840443-21842209	+	3R:26014721-26016487	+	Yes	3.034	2.827
FBgn0002579	RpL36	X:522371-523516	-	X:628338-629483	-	Yes	10.413	9.27
FBgn0002590	RpS5a	X:17037621-17042297	-	X:17143588-17148264	-	Yes	8.819	8.024
FBgn0002592	E(spl)m2-BFM	3R:21842236-21843192	-	3R:26016514-26017470	-	Yes	-1.091	-0.632
FBgn0002593	RpLP1	2L:419952-420864	+	2L:419952-420864	+	Yes	10.656	9.422
FBgn0002607	RpL19	2R:20855400-20857070	-	2R:24967877-24969547	-	Yes	10.12	8.839
FBgn0002609	E(spl)m3-HLH	3R:21847545-21848849	+	3R:26021823-26023127	+	Yes	2.492	0.543
FBgn0002622	RpS3	3R:19184534-19185929	+	3R:23358812-23360207	+	Yes	10.049	8.799
FBgn0002626	RpL32	3R:25870951-25871883	-	3R:30045229-30046161	-	Yes	10.29	9.127
FBgn0002629	E(spl)m4-BFM	3R:21849543-21850301	-	3R:26023821-26024579	-	No	-2.106	-8.849
FBgn0002631	E(spl)m5-HLH	3R:21854576-21855457	-	3R:26028854-26029735	-	No	-3.915	-9.238
FBgn0002632	E(spl)m6-BFM	3R:21858633-21859769	+	3R:26032911-26034047	+	No	-3.347	-6.269
FBgn0002633	E(spl)m7-HLH	3R:21862760-21863741	+	3R:26037038-26038019	+	No	-0.16	-4.036
FBgn0002638	Rcc1	3L:5923362-5925873	-	3L:5930262-5932773	-	Yes	7.5	4.318
FBgn0002641	mal	X:20300702-20304237	+	X:20429675-20433210	+	Yes	3.99	2.969
FBgn0002643	mam	2R:9878708-9947861	+	2R:13991203-14060356	+	Yes	2.845	2.494
FBgn0002645	Map205	3R:27881001-27894163	-	3R:32055279-32068441	-	Yes	5.689	5.201
FBgn0002673	twe	2L:16259414-16261877	-	2L:16259414-16261877	-	Yes	5.572	4.517
FBgn0002707	mei-9	X:4208263-4212834	-	X:4314230-4318801	-	Yes	3.891	1.229
FBgn0002709	mei-218	X:17030018-17037029	-	X:17135985-17142996	-	No	-1.783	-2.513
FBgn0002715	mei-S332	2R:18009606-18012071	+	2R:22122101-22124566	+	Yes	4.302	4.692
FBgn0002716	mei-W68	2R:15343675-15347028	+	2R:19456170-19459523	+	Yes	0.569	0.699
FBgn0002719	Men	3R:8538825-8548164	-	3R:12713103-12722442	-	Yes	7.231	7.776
FBgn0002723	Met	X:11510157-11515313	+	X:11616124-11621280	+	Yes	3.168	2.875
FBgn0002732	E(spl)malpha-BFM	3R:21836615-21837290	+	3R:26010893-26011568	+	Yes	0.244	-0.919
FBgn0002733	E(spl)mbeta-HLH	3R:21830768-21831745	-	3R:26005046-26006023	-	Yes	2.249	1.404
FBgn0002734	E(spl)mdelta-HLH	3R:21823343-21824355	+	3R:25997621-25998633	+	No	-3.908	-7.454
FBgn0002735	E(spl)mgamma-HLH	3R:21825573-21826483	+	3R:25999851-26000761	+	No	-1.77	-7.763
FBgn0002736	mago	2R:17016082-17017242	+	2R:21128577-21129737	+	Yes	6.154	3.893
FBgn0002772	Mlc1	3R:23482800-23485899	-	3R:27657078-27660177	-	Yes	7.81	8.904
FBgn0002773	Mlc2	3R:25997160-26000273	-	3R:30171438-30174551	-	Yes	8.854	9.982
FBgn0002774	mle	2R:1862362-1868283	-	2R:5974857-5980778	-	Yes	3.726	3.505
FBgn0002775	msl-3	3L:7116313-7118633	-	3L:7123213-7125533	-	Yes	5.045	3.174
FBgn0002778	mnd	3L:14978200-14984767	+	3L:14985100-14991667	+	Yes	5.446	3.551
FBgn0002780	mod	3R:27877782-27880696	+	3R:32052060-32054974	+	Yes	8.697	5.493
FBgn0002781	mod(mdg4)	3R:17176568-17203123	.	3R:21350846-21377401	.	Yes	4.175	2.285
FBgn0002783	mor	3R:11793856-11798635	-	3R:15968134-15972913	-	Yes	6.007	3.782
FBgn0002787	Rpn8	2R:20287551-20292050	+	2R:24400028-24404527	+	Yes	6.86	6.114
FBgn0002789	Mp20	2R:9134175-9136385	+	2R:13246670-13248880	+	Yes	7.057	7.729
FBgn0002791	mr	2R:19859954-19862931	+	2R:23972431-23975408	+	Yes	4.719	3.994
FBgn0002838	ms(3)K81	3R:22701574-22702284	+	3R:26875852-26876562	+	Yes	-7.607	2.796
FBgn0002842	sa	3L:21398525-21399838	-	3L:21405425-21406738	-	Yes	-7.448	3.316
FBgn0002855	Acp26Aa	2L:5892883-5893896	-	2L:5892883-5893896	-	Yes	-4.524	8.54
FBgn0002856	Acp26Ab	2L:5892298-5892862	-	2L:5892298-5892862	-	Yes	-5.719	7.713
FBgn0002862	Mst87F	3R:9652873-9653730	-	3R:13827151-13828008	-	Yes	-3.299	9.46
FBgn0002863	Acp95EF	3R:20054697-20055001	+	3R:24228975-24229279	+	Yes	-2.76	11.827
FBgn0002865	Mst98Ca	3R:24117060-24118378	+	3R:28291338-28292656	+	Yes	-5.659	7.878
FBgn0002868	MtnA	3R:5609129-5610092	-	3R:9783407-9784370	-	Yes	8.796	9.855
FBgn0002869	MtnB	3R:16328824-16329468	-	3R:20503102-20503746	-	Yes	2.302	2.757
FBgn0002872	mu2	3L:1942734-1947475	-	3L:1942734-1947475	-	Yes	5	2.215
FBgn0002873	mud	X:14141765-14152628	+	X:14247732-14258595	+	Yes	5.164	3.859
FBgn0002878	mus101	X:13616279-13621146	+	X:13722246-13727113	+	Yes	4.515	1.553
FBgn0002887	mus201	2L:8438169-8442342	+	2L:8438169-8442342	+	Yes	4.196	2.962
FBgn0002891	mus205	2R:3681130-3688549	+	2R:7793625-7801044	+	Yes	3.007	1.636
FBgn0002899	mus301	3L:8130908-8135114	+	3L:8137808-8142014	+	Yes	4.462	0.751
FBgn0002901	mus304	3L:18102914-18105947	+	3L:18109814-18112847	+	Yes	3.928	2.274
FBgn0002905	mus308	3R:8531245-8538021	-	3R:12705523-12712299	-	Yes	3.276	1.606
FBgn0002906	Blm	3R:7562532-7567505	-	3R:11736810-11741783	-	Yes	4.023	2.512
FBgn0002909	mus312	3L:7322232-7326571	+	3L:7329132-7333471	+	No	-9.966	-9.966
FBgn0002914	Myb	X:15748865-15751856	-	X:15854832-15857823	-	Yes	5.846	5.149
FBgn0002917	na	X:14160400-14171449	+	X:14266367-14277416	+	Yes	-0.194	1.604
FBgn0002921	Atpalpha	3R:16774436-16801961	+	3R:20948714-20976239	+	Yes	6.3	6.988
FBgn0002922	nau	3R:19538536-19544079	-	3R:23712814-23718357	-	Yes	-0.342	1.411
FBgn0002924	ncd	3R:25630012-25632849	-	3R:29804290-29807127	-	Yes	4.808	2.118
FBgn0002926	ndl	3L:6587038-6596466	-	3L:6593938-6603366	-	Yes	3.525	-3.426
FBgn0002930	nec	2R:3043982-3045746	-	2R:7156477-7158241	-	Yes	5.081	5.874
FBgn0002931	net	2L:82421-87387	-	2L:82421-87387	-	Yes	1.568	2.829
FBgn0002932	neur	3R:4846070-4865193	-	3R:9020348-9039471	-	Yes	3.832	2.488
FBgn0002933	ng1	X:3136445-3136967	+	X:3242412-3242934	+	No	-8.701	-8.393
FBgn0002936	ninaA	2L:877302-878270	+	2L:877302-878270	+	Yes	2.247	3.719
FBgn0002937	ninaB	3R:9526287-9528886	+	3R:13700565-13703164	+	Yes	1.673	3.162
FBgn0002938	ninaC	2L:7377702-7384344	+	2L:7377702-7384344	+	Yes	5.326	6.741
FBgn0002939	ninaD	2L:18081628-18083608	+	2L:18081628-18083608	+	Yes	3.99	5.53
FBgn0002940	ninaE	3R:15711977-15713928	-	3R:19886255-19888206	-	Yes	9.424	10.742
FBgn0002941	slou	3R:17374383-17382904	-	3R:21548661-21557182	-	No	-2.418	-0.828
FBgn0002945	nkd	3L:18996841-19038549	-	3L:19003741-19045449	-	Yes	1.177	2.228
FBgn0002948	nod	X:11474805-11479783	+	X:11580772-11585750	+	Yes	5.64	0.918
FBgn0002962	nos	3R:14982960-14985924	+	3R:19157238-19160202	+	Yes	8.257	0.008
FBgn0002973	numb	2L:9437469-9464184	+	2L:9437469-9464184	+	Yes	4.548	4.237
FBgn0002985	odd	2L:3604224-3606756	-	2L:3604224-3606756	-	Yes	1.395	2.207
FBgn0002989	okr	2L:2989594-2992759	-	2L:2989594-2992759	-	Yes	3.701	1.5
FBgn0003002	opa	3R:678535-695701	+	3R:4852813-4869979	+	Yes	-1.755	-0.725
FBgn0003008	or	2R:19855462-19856466	+	2R:23967939-23968943	+	Yes	4.962	4.079
FBgn0003009	ord	2R:19158780-19163059	-	2R:23271257-23275536	-	Yes	-3.065	2.058
FBgn0003011	ort	3R:15485470-15489394	+	3R:19659748-19663672	+	Yes	-1.462	0.123
FBgn0003015	osk	3R:4760848-4764117	+	3R:8935126-8938395	+	Yes	8.984	-2.105
FBgn0003016	osp	2L:14599196-14689340	-	2L:14599196-14689340	-	Yes	3.901	3.523
FBgn0003023	otu	X:8379041-8383568	-	X:8485008-8489535	-	Yes	6.428	-1.319
FBgn0003028	ovo	X:4942306-4964962	+	X:5048273-5070929	+	Yes	5.175	1.422
FBgn0003034	SP	3L:13294735-13295022	+	3L:13301635-13301922	+	Yes	-5.602	9.684
FBgn0003041	pbl	3L:7889209-7905054	-	3L:7896109-7911954	-	Yes	4.982	2.752
FBgn0003042	Pc	3L:21299238-21311120	-	3L:21306138-21318020	-	Yes	4.513	2.52
FBgn0003044	Pcl	2R:14022931-14027495	+	2R:18135426-18139990	+	Yes	4.576	2.235
FBgn0003046	Pcp	2L:7021682-7022470	+	2L:7021682-7022470	+	Yes	2.063	-2.279
FBgn0003048	pcx	X:2119329-2132078	+	X:2225296-2238045	+	Yes	3.405	2.803
FBgn0003053	peb	X:4511597-4521239	+	X:4617564-4627206	+	Yes	3.315	3.263
FBgn0003057	CG10598	X:17119190-17120900	-	X:17225157-17226867	-	No	-3.139	-9.062
FBgn0003060	CG9757	3R:9437305-9438155	-	3R:13611583-13612433	-	No	-3.05	-3.99
FBgn0003062	Fib	2R:18960432-18962248	-	2R:23072909-23074725	-	Yes	6.441	3.282
FBgn0003065	CG2150	3R:27589026-27590494	-	3R:31763304-31764772	-	No	-4.025	-6.409
FBgn0003067	Pepck	2R:14424272-14426921	+	2R:18536767-18539416	+	No	-9.966	-9.966
FBgn0003068	per	X:2579613-2586813	+	X:2685580-2692780	+	Yes	1.547	2.344
FBgn0003071	Pfk	2R:5997245-6004962	+	2R:10109740-10117457	+	Yes	5.789	6.806
FBgn0003074	Pgi	2R:4798405-4801574	-	2R:8910900-8914069	-	Yes	7.302	7.979
FBgn0003076	Pgm	3L:16119118-16121631	-	3L:16126018-16128531	-	Yes	7.72	7.996
FBgn0003079	phl	X:2189499-2237903	+	X:2295466-2343870	+	Yes	4.279	2.824
FBgn0003082	phr	2R:3712794-3714824	+	2R:7825289-7827319	+	Yes	3.864	0.837
FBgn0003086	Pig1	X:3142633-3143322	-	X:3248600-3249289	-	No	-7.736	-8.415
FBgn0003087	pim	2L:10362989-10364092	+	2L:10362989-10364092	+	Yes	6.613	4.031
FBgn0003089	pip	3L:19291723-19330709	-	3L:19298623-19337609	-	No	-1.621	-2.761
FBgn0003090	pk	2R:3038208-3110883	+	2R:7150703-7223378	+	Yes	-0.882	0.133
FBgn0003091	Pkc53E	2R:12812160-12832631	+	2R:16924655-16945126	+	Yes	2.267	3.546
FBgn0003093	Pkc98E	3R:24864878-24874870	+	3R:29039156-29049148	+	Yes	3.353	3.836
FBgn0003114	plu	2R:16150463-16151189	-	2R:20262958-20263684	-	Yes	5.474	-2.995
FBgn0003116	pn	X:2075244-2076949	+	X:2181211-2182916	+	Yes	4.511	3.919
FBgn0003117	pnr	3R:11851801-11867518	+	3R:16026079-16041796	+	Yes	-1.011	-0.604
FBgn0003118	pnt	3R:19115953-19171889	-	3R:23290231-23346167	-	Yes	1.445	1.526
FBgn0003124	polo	3L:20302754-20306566	+	3L:20309654-20313466	+	Yes	6.927	4.489
FBgn0003129	Poxm	3R:4144747-4159514	-	3R:8319025-8333792	-	Yes	-0.092	1.375
FBgn0003130	Poxn	2R:11714198-11722560	-	2R:15826693-15835055	-	No	-4.154	-2.817
FBgn0003132	Pp1-13C	X:15253134-15255094	-	X:15359101-15361061	-	Yes	-5.379	5.016
FBgn0003134	Pp1alpha-96A	3R:20343992-20348053	+	3R:24518270-24522331	+	Yes	5.723	5.807
FBgn0003137	Ppn	3R:24346387-24366046	-	3R:28520665-28540324	-	Yes	4.618	4.839
FBgn0003138	Ptp61F	3L:1342493-1475257	-	3L:1342493-1475257	-	Yes	4.618	3.501
FBgn0003139	PpV	X:6265098-6266948	-	X:6371065-6372915	-	Yes	5.517	3.794
FBgn0003140	PpY-55A	2R:13842901-13844075	-	2R:17955396-17956570	-	Yes	-8.387	4.095
FBgn0003141	pr	2L:20073719-20075458	-	2L:20073719-20075458	-	Yes	5.586	4.845
FBgn0003145	prd	2L:12082995-12085827	-	2L:12082995-12085827	-	Yes	-5.285	2.297
FBgn0003149	Prm	3L:8725958-8738410	-	3L:8732858-8745310	-	Yes	5.63	6.803
FBgn0003159	ptr	X:2238982-2260389	-	X:2344949-2366356	-	Yes	3.677	3.831
FBgn0003162	Pu	2R:17062820-17070113	+	2R:21175315-21182608	+	Yes	4.124	5.082
FBgn0003165	pum	3R:4892065-5063404	-	3R:9066343-9237682	-	Yes	4.034	3.136
FBgn0003169	put	3R:10444752-10451425	-	3R:14619030-14625703	-	Yes	5.492	4.255
FBgn0003174	pwn	2R:3170077-3188311	+	2R:7282572-7300806	+	Yes	-0.62	-1.446
FBgn0003175	px	2R:18381802-18449570	-	2R:22494297-22562065	-	Yes	2.331	2.786
FBgn0003178	PyK	3R:18193258-18198468	+	3R:22367536-22372746	+	Yes	8.69	8.91
FBgn0003187	qua	2L:17486806-17497208	-	2L:17486806-17497208	-	Yes	5.499	5.195
FBgn0003189	r	X:16549392-16562745	+	X:16655359-16668712	+	Yes	4.719	2.876
FBgn0003204	ras	X:10638535-10643130	+	X:10744502-10749097	+	Yes	6.258	4.486
FBgn0003205	Ras85D	3R:5336283-5338789	-	3R:9510561-9513067	-	Yes	6.291	5.052
FBgn0003206	Ras64B	3L:4139076-4141398	+	3L:4139076-4141398	+	Yes	5.433	5.173
FBgn0003209	raw	2L:8709880-8740660	-	2L:8709880-8740660	-	Yes	3.979	4.151
FBgn0003210	rb	X:4429668-4434659	-	X:4535635-4540626	-	Yes	5.117	4.221
FBgn0003218	rdgB	X:13656785-13673521	+	X:13762752-13779488	+	Yes	3.822	3.956
FBgn0003227	rec	3R:11648741-11658354	-	3R:15823019-15832632	-	Yes	2.33	-1.228
FBgn0003231	ref(2)P	2L:19542468-19545548	+	2L:19542468-19545548	+	Yes	7.532	7.592
FBgn0003248	Rh2	3R:14725145-14726741	+	3R:18899423-18901019	+	Yes	2.747	4.012
FBgn0003249	Rh3	3R:15906782-15908172	-	3R:20081060-20082450	-	Yes	4.491	5.676
FBgn0003250	Rh4	3L:16845627-16855617	-	3L:16852527-16862517	-	Yes	4.994	6.495
FBgn0003254	rib	2R:15157583-15168901	+	2R:19270078-19281396	+	Yes	-1.708	0.376
FBgn0003255	rk	2L:13982743-14001248	-	2L:13982743-14001248	-	Yes	-1.015	-0.716
FBgn0003256	rl	2RHet:198176-252641	+	2R:1071462-1125927	+	Yes	4.362	3.542
FBgn0003257	r-l	3R:16896279-16899041	-	3R:21070557-21073319	-	Yes	5.606	2.262
FBgn0003261	Rm62	3R:1826148-1834301	-	3R:6000426-6008579	-	Yes	6.861	5.788
FBgn0003267	ro	3R:22702493-22706893	-	3R:26876771-26881171	-	No	-7.706	-3.65
FBgn0003268	rod	3R:27406673-27413966	+	3R:31580951-31588244	+	Yes	4.393	1.257
FBgn0003270	amos	2L:18596136-18596921	-	2L:18596136-18596921	-	No	-5.254	-8.895
FBgn0003274	RpLP2	2R:12473634-12474237	+	2R:16586129-16586732	+	Yes	11.475	10.061
FBgn0003275	RpII18	3R:1197517-1198119	+	3R:5371795-5372397	+	Yes	6.186	5.603
FBgn0003277	RpII215	X:11456833-11464359	-	X:11562800-11570326	-	Yes	4.984	3.633
FBgn0003278	RpI135	2L:404285-407969	+	2L:404285-407969	+	Yes	4.811	1.876
FBgn0003279	RpL4	3R:23748543-23750610	+	3R:27922821-27924888	+	Yes	9.528	8.197
FBgn0003285	rst	X:2844432-2867867	-	X:2950399-2973834	-	Yes	1.532	0.447
FBgn0003292	rt	3L:11577222-11580870	-	3L:11584122-11587770	-	Yes	3.659	-0.178
FBgn0003295	ru	3L:1370628-1387437	+	3L:1370628-1387437	+	Yes	-2.056	-0.381
FBgn0003300	run	X:20561697-20568348	+	X:20690670-20697321	+	No	-3.027	-2.484
FBgn0003301	rut	X:14681511-14720106	-	X:14787478-14826073	-	Yes	2.172	3.227
FBgn0003302	rux	X:5929786-5931833	-	X:6035753-6037800	-	Yes	4.576	4.35
FBgn0003308	ry	3R:8858250-8863742	+	3R:13032528-13038020	+	Yes	3.007	3.701
FBgn0003310	S	2L:1049674-1077815	-	2L:1049674-1077815	-	Yes	4.46	2.911
FBgn0003312	sad	3R:7702957-7705476	+	3R:11877235-11879754	+	Yes	0.738	-1.672
FBgn0003313	sala	2L:11484707-11486949	+	2L:11484707-11486949	+	No	-9.966	-9.966
FBgn0003317	sax	2R:3693989-3697572	+	2R:7806484-7810067	+	Yes	5.035	3.983
FBgn0003319	Sb	3R:11941883-11971006	+	3R:16116161-16145284	+	No	-5.721	-4.455
FBgn0003321	sbr	X:10726785-10741125	-	X:10832752-10847092	-	Yes	5.164	4.658
FBgn0003326	sca	2R:8668046-8689515	+	2R:12780541-12802010	+	Yes	-0.107	0.633
FBgn0003328	scb	2R:11136289-11146003	+	2R:15248784-15258498	+	Yes	4.361	4.24
FBgn0003330	Sce	3R:23506153-23507751	-	3R:27680431-27682029	-	Yes	4.207	2.446
FBgn0003334	Scm	3R:5459081-5463333	-	3R:9633359-9637611	-	Yes	4.763	3.793
FBgn0003339	Scr	3R:2648842-2675703	-	3R:6823120-6849981	-	Yes	-1.074	0.528
FBgn0003345	sd	X:15698403-15721714	+	X:15804370-15827681	+	Yes	3.308	3.38
FBgn0003346	RanGAP	2L:19441959-19447317	+	2L:19441959-19447317	+	Yes	5.962	4.005
FBgn0003353	sei	2R:19934934-19940558	+	2R:24047411-24053035	+	Yes	2.971	2.611
FBgn0003356	Jon99Cii	3R:25749476-25750337	-	3R:29923754-29924615	-	Yes	6.011	5.743
FBgn0003357	Jon99Ciii	3R:25747938-25749177	+	3R:29922216-29923455	+	Yes	7.638	7.454
FBgn0003358	Jon99Ci	3R:25750948-25751911	-	3R:29925226-29926189	-	Yes	6.102	6.651
FBgn0003360	sesB	X:10674926-10680991	-	X:10780893-10786958	-	Yes	10.486	10.817
FBgn0003366	sev	X:10965474-10980332	-	X:11071441-11086299	-	Yes	2.492	3.761
FBgn0003371	sgg	X:2527985-2573586	+	X:2633952-2679553	+	Yes	3.794	3.977
FBgn0003372	Sgs1	2L:4937409-4941423	+	2L:4937409-4941423	+	No	-6.866	-7.293
FBgn0003373	Sgs3	3L:11505321-11506502	+	3L:11512221-11513402	+	No	-8.604	-8.746
FBgn0003374	Sgs4	X:3143534-3145073	+	X:3249501-3251040	+	No	-5.044	-3.794
FBgn0003375	Sgs5	3R:13421084-13421834	+	3R:17595362-17596112	+	No	-8.605	-8.132
FBgn0003377	Sgs7	3L:11502961-11503347	+	3L:11509861-11510247	+	No	-8.76	-8.004
FBgn0003378	Sgs8	3L:11502067-11502494	-	3L:11508967-11509394	-	No	-8.888	-8.564
FBgn0003380	Sh	X:17818340-17957278	-	X:17924307-18063245	-	Yes	0.649	2.318
FBgn0003382	sha	2R:7211819-7223968	+	2R:11324314-11336463	+	No	-4.204	-2.543
FBgn0003386	Shaw	2L:3718185-3729145	+	2L:3718185-3729145	+	Yes	0.819	2.379
FBgn0003388	shd	3L:14607558-14615305	+	3L:14614458-14622205	+	Yes	0.369	1.433
FBgn0003390	shf	X:6665496-6673692	-	X:6771463-6779659	-	Yes	2.69	3.865
FBgn0003391	shg	2R:16937159-16944702	-	2R:21049654-21057197	-	Yes	5.002	3.898
FBgn0003392	shi	X:15786149-15800749	+	X:15892116-15906716	+	Yes	4.877	5.281
FBgn0003396	shn	2R:7046591-7104899	+	2R:11159086-11217394	+	Yes	2.865	3.202
FBgn0003401	shu	2R:19728984-19730809	-	2R:23841461-23843286	-	Yes	5.234	0.279
FBgn0003410	sina	3L:16846851-16851812	+	3L:16853751-16858712	+	Yes	5.273	4.159
FBgn0003411	sisA	X:11215612-11216390	-	X:11321579-11322357	-	Yes	-1.615	-1.546
FBgn0003415	skd	3L:20985914-21020534	-	3L:20992814-21027434	-	Yes	3.886	3.119
FBgn0003416	sl	X:16244348-16250515	+	X:16350315-16356482	+	Yes	4.467	2.731
FBgn0003423	slgA	X:21245029-21256186	+	X:21374002-21385159	+	Yes	5.961	6.037
FBgn0003429	slo	3R:20488213-20537317	+	3R:24662491-24711595	+	Yes	2.645	4.136
FBgn0003430	slp1	2L:3825675-3827099	+	2L:3825675-3827099	+	Yes	-0.701	0.257
FBgn0003435	sm	2R:15405369-15519013	-	2R:19517864-19631508	-	Yes	2.143	5.021
FBgn0003444	smo	2L:277582-282167	+	2L:277582-282167	+	Yes	4.792	2.718
FBgn0003447	sn	X:7858057-7880634	+	X:7964024-7986601	+	Yes	5.311	3.247
FBgn0003448	sna	2L:15476593-15478260	-	2L:15476593-15478260	-	No	-4.809	-8.577
FBgn0003449	snf	X:5203275-5204534	+	X:5309242-5310501	+	Yes	6.357	4.871
FBgn0003450	snk	3R:8865887-8868492	-	3R:13040165-13042770	-	Yes	2.646	-1.257
FBgn0003459	stwl	3L:14396030-14403039	-	3L:14402930-14409939	-	Yes	4.364	2.725
FBgn0003460	so	2R:3306855-3322377	+	2R:7419350-7434872	+	Yes	0.134	2.001
FBgn0003462	Sod	3L:11105381-11106840	-	3L:11112281-11113740	-	Yes	8.66	8.919
FBgn0003463	sog	X:15497316-15527467	-	X:15603283-15633434	-	Yes	2.547	3.684
FBgn0003464	sol	X:21221307-21228939	+	X:21350280-21357912	+	Yes	4.391	3.122
FBgn0003475	spir	2L:20311219-20348386	+	2L:20311219-20348386	+	Yes	3.582	3.776
FBgn0003479	spn-A	3R:25880418-25881759	-	3R:30054696-30056037	-	Yes	4.662	2.772
FBgn0003480	spn-B	3R:10153773-10155330	+	3R:14328051-14329608	+	Yes	3.725	0.477
FBgn0003482	spn-D	3R:22991438-22992844	+	3R:27165716-27167122	+	Yes	3.196	-1.425
FBgn0003483	spn-E	3R:11663141-11670137	+	3R:15837419-15844415	+	Yes	4.946	1.121
FBgn0003486	spo	3L:5583183-5585671	-	3L:5590083-5592571	-	Yes	1.904	-5.388
FBgn0003495	spz	3R:22890712-22895792	-	3R:27064990-27070070	-	Yes	4.408	3.498
FBgn0003499	sr	3R:13916525-13961305	+	3R:18090803-18135583	+	Yes	-0.541	0.699
FBgn0003502	Btk29A	2L:8258373-8301079	-	2L:8258373-8301079	-	Yes	4.608	2.738
FBgn0003507	srp	3R:11811874-11829803	+	3R:15986152-16004081	+	Yes	2.639	2.448
FBgn0003510	Sry-alpha	3R:25866939-25868793	+	3R:30041217-30043071	+	Yes	1.74	-0.123
FBgn0003511	Sry-beta	3R:25865441-25866753	+	3R:30039719-30041031	+	Yes	4.3	2.778
FBgn0003512	Sry-delta	3R:25869063-25870608	+	3R:30043341-30044886	+	Yes	4.697	3.201
FBgn0003513	ss	3R:12200156-12229412	-	3R:16374434-16403690	-	Yes	-1.881	-0.304
FBgn0003514	sqh	X:6117094-6119173	-	X:6223061-6225140	-	Yes	6.037	5.737
FBgn0003515	st	3L:16490751-16493560	+	3L:16497651-16500460	+	Yes	2.676	3.53
FBgn0003517	sta	X:1375830-1377446	-	X:1481797-1483413	-	Yes	10.447	8.959
FBgn0003520	stau	2R:14005401-14013284	-	2R:18117896-18125779	-	Yes	4.172	3.702
FBgn0003525	stg	3R:25077548-25081522	-	3R:29251826-29255800	-	Yes	5.487	-1.016
FBgn0003527	stil	2R:8457872-8459388	+	2R:12570367-12571883	+	Yes	3.825	2.787
FBgn0003545	sub	2R:13633005-13635583	-	2R:17745500-17748078	-	Yes	5.034	3.502
FBgn0003557	Su(dx)	2L:2037714-2044372	+	2L:2037714-2044372	+	Yes	5.213	4.607
FBgn0003559	su(f)	XHet:75589-80249	+	X:23096771-23101431	+	Yes	3.924	3.225
FBgn0003567	su(Hw)	3R:10130177-10134311	-	3R:14304455-14308589	-	Yes	5.461	3.599
FBgn0003575	su(s)	X:529923-537793	+	X:635890-643760	+	Yes	4.805	3.913
FBgn0003598	Su(var)3-7	3R:9090086-9095760	+	3R:13264364-13270038	+	Yes	4.891	2.412
FBgn0003607	Su(var)205	2L:8209626-8211122	-	2L:8209626-8211122	-	Yes	7.408	5.647
FBgn0003612	Su(var)2-10	2R:5003627-5009505	+	2R:9116122-9122000	+	Yes	5.399	3.682
FBgn0003638	su(w[a])	X:906812-940073	+	X:1012779-1046040	+	Yes	3.616	3.86
FBgn0003651	svp	3R:8084459-8128507	+	3R:12258737-12302785	+	Yes	1.966	3.12
FBgn0003654	sw	X:20099035-20107456	-	X:20227961-20236382	-	Yes	2.658	2.699
FBgn0003655	swa	X:6257451-6259741	-	X:6363418-6365708	-	Yes	7.336	-0.783
FBgn0003656	sws	X:7850853-7862269	-	X:7956820-7968236	-	Yes	4.752	4.944
FBgn0003660	Syb	2R:6136940-6139922	-	2R:10249435-10252417	-	Yes	6.323	6.125
FBgn0003676	T-cp1	3R:18314827-18317161	-	3R:22489105-22491439	-	Yes	7.331	4.458
FBgn0003683	term	3L:18585403-18586871	-	3L:18592303-18593771	-	No	-2.691	-8.327
FBgn0003687	Tbp	2R:17573697-17575147	-	2R:21686192-21687642	-	Yes	4.922	2.496
FBgn0003701	thr	2R:13748778-13753468	-	2R:17861273-17865963	-	Yes	4.931	1.631
FBgn0003710	tipE	3L:4188499-4193788	+	3L:4188499-4193788	+	Yes	0.168	1.603
FBgn0003714	tko	X:2336346-2338009	-	X:2442313-2443976	-	Yes	4.738	3.235
FBgn0003716	tkv	2L:5219000-5271384	-	2L:5219000-5271384	-	Yes	4.093	3.815
FBgn0003719	tld	3R:20575453-20579232	+	3R:24749731-24753510	+	Yes	-0.8	-0.677
FBgn0003720	tll	3R:26678037-26680122	+	3R:30852315-30854400	+	No	-4.599	-7.101
FBgn0003721	Tm1	3R:11107093-11134501	+	3R:15281371-15308779	+	Yes	6.083	6.402
FBgn0003731	Egfr	2R:17409925-17447482	+	2R:21522420-21559977	+	Yes	4.188	4.601
FBgn0003732	Top2	2L:19447365-19453490	-	2L:19447365-19453490	-	Yes	7.005	3.987
FBgn0003733	tor	2R:3592688-3596689	-	2R:7705183-7709184	-	Yes	5.264	1.588
FBgn0003741	tra	3L:16583159-16584150	-	3L:16590059-16591050	-	Yes	3.141	2.463
FBgn0003742	tra2	2R:10489509-10491842	-	2R:14602004-14604337	-	Yes	5.157	3.858
FBgn0003744	trc	3L:19823964-19827404	-	3L:19830864-19834304	-	Yes	4.944	3.742
FBgn0003747	Gr5a	X:5574650-5576521	+	X:5680617-5682488	+	No	-4.157	-3.358
FBgn0003748	Treh	2R:16961523-16976450	+	2R:21074018-21088945	+	Yes	6.379	6.773
FBgn0003751	trk	2L:10271443-10272324	-	2L:10271443-10272324	-	Yes	2.515	-1.667
FBgn0003861	trp	3R:25740243-25746011	-	3R:29914521-29920289	-	Yes	5.163	6.642
FBgn0003862	trx	3R:10089080-10112625	-	3R:14263358-14286903	-	Yes	4.42	4.15
FBgn0003863	alphaTry	2R:7231765-7232624	-	2R:11344260-11345119	-	Yes	10.628	10.792
FBgn0003865	tsg	X:11882095-11882981	-	X:11988062-11988948	-	No	-3.807	-9.287
FBgn0003866	tsh	2L:21828593-21837011	+	2L:21828593-21837011	+	Yes	0.955	1.629
FBgn0003867	tsl	3R:17603836-17608258	-	3R:21778114-21782536	-	Yes	3.668	4.233
FBgn0003870	ttk	3R:27539589-27561114	+	3R:31713867-31735392	+	Yes	4.471	3.479
FBgn0003882	tub	3R:213464-215535	+	3R:4387742-4389813	+	Yes	5.598	4.023
FBgn0003884	alphaTub84B	3R:2912321-2914561	+	3R:7086599-7088839	+	Yes	8.232	8.07
FBgn0003885	alphaTub84D	3R:3356475-3358454	+	3R:7530753-7532732	+	Yes	5.17	5.687
FBgn0003886	alphaTub85E	3R:5556943-5558972	-	3R:9731221-9733250	-	Yes	-0.468	3.599
FBgn0003887	betaTub56D	2R:15334824-15339105	-	2R:19447319-19451600	-	Yes	8.166	6.323
FBgn0003888	betaTub60D	2R:20193404-20200622	+	2R:24305881-24313099	+	Yes	3.516	4.001
FBgn0003889	betaTub85D	3R:5234105-5236004	-	3R:9408383-9410282	-	Yes	-2.446	8.423
FBgn0003890	betaTub97EF	3R:23792730-23814106	-	3R:27967008-27988384	-	Yes	4.802	5.222
FBgn0003891	tud	2R:17070827-17080418	+	2R:21183322-21192913	+	Yes	6.197	6.182
FBgn0003892	ptc	2R:4537154-4552728	+	2R:8649649-8665223	+	Yes	0.454	1.393
FBgn0003896	tup	2L:18859507-18881261	-	2L:18859507-18881261	-	Yes	0.313	1.522
FBgn0003900	twi	2R:18872897-18935848	+	2R:22985374-23048325	+	Yes	-1.992	1.406
FBgn0003916	snRNA:U1:21D	2L:901491-901654	-	2L:901491-901654	-	Yes	0.147	-4.616
FBgn0003920	snRNA:U2:14B	X:16148705-16148896	+	X:16254672-16254863	+	Yes	3.352	-2.302
FBgn0003922	snRNA:U2:38ABa	2L:19815614-19815805	-	2L:19815614-19815805	-	No	-7.413	-8.33
FBgn0003923	snRNA:U2:38ABb	2L:19812646-19812836	+	2L:19812646-19812836	+	Yes	0.944	-0.244
FBgn0003926	snRNA:U3:22A	2L:1432711-1432921	+	2L:1432711-1432921	+	No	-9.553	-9.472
FBgn0003930	snRNA:U4:39B	2L:21215036-21215178	-	2L:21215036-21215178	-	Yes	8.34	8.195
FBgn0003931	snRNA:U4:38AB	2L:19810734-19810875	+	2L:19810734-19810875	+	Yes	5.714	4.378
FBgn0003933	snRNA:U5:14B	X:16148041-16148150	-	X:16254008-16254117	-	Yes	3.156	-6.35
FBgn0003934	snRNA:U5:23D	2L:3048701-3048831	+	2L:3048701-3048831	+	Yes	4.1	2.97
FBgn0003935	snRNA:U5:34A	2L:13244848-13244974	+	2L:13244848-13244974	+	Yes	2.883	0.49
FBgn0003936	snRNA:U5:35D	2L:15751557-15751682	-	2L:15751557-15751682	-	No	-8.277	-6.518
FBgn0003938	snRNA:U5:63BC	3L:3090801-3090923	+	3L:3090801-3090923	+	Yes	4.596	4.5
FBgn0003941	RpL40	2L:4227699-4228561	+	2L:4227699-4228561	+	Yes	8.41	7.212
FBgn0003942	RpS27A	2L:10408352-10410456	+	2L:10408352-10410456	+	Yes	10.337	8.985
FBgn0003943	Ubi-p63E	3L:3899259-3903184	-	3L:3899259-3903184	-	Yes	3.648	5.2
FBgn0003944	Ubx	3R:12482345-12560148	-	3R:16656623-16734426	-	Yes	1.66	2.521
FBgn0003950	unc	X:20982441-20987941	-	X:21111414-21116914	-	Yes	-0.014	0.298
FBgn0003961	Uro	2L:7780085-7781415	+	2L:7780085-7781415	+	Yes	5.774	5.355
FBgn0003963	ush	2L:476220-540560	+	2L:476220-540560	+	Yes	1.097	0.244
FBgn0003964	usp	X:1932831-1936344	-	X:2038798-2042311	-	Yes	5.149	3.612
FBgn0003965	v	X:10818005-10819664	+	X:10923972-10925631	+	Yes	4.149	4.822
FBgn0003969	vap	X:15893984-15899845	-	X:15999951-16005812	-	Yes	5.044	3.366
FBgn0003975	vg	2R:8772137-8786890	+	2R:12884632-12899385	+	Yes	0.815	2.006
FBgn0003977	vir	2R:19247715-19253878	-	2R:23360192-23366355	-	Yes	2.92	2.277
FBgn0003978	vls	2L:20064261-20065679	-	2L:20064261-20065679	-	Yes	4.1	1.941
FBgn0003979	Vm26Aa	2L:5959596-5960340	-	2L:5959596-5960340	-	Yes	6.897	-6.771
FBgn0003980	Vm26Ab	2L:5957004-5957639	+	2L:5957004-5957639	+	Yes	3.384	-8.822
FBgn0003983	Vm34Ca	2L:13411141-13411631	-	2L:13411141-13411631	-	Yes	7.693	-6.457
FBgn0003984	vn	3L:5806438-5838764	-	3L:5813338-5845664	-	Yes	0.549	1.756
FBgn0003996	w	X:2684632-2690499	-	X:2790599-2796466	-	Yes	2.413	3.019
FBgn0003997	W	3L:18160845-18178741	-	3L:18167745-18185641	-	Yes	1.98	1.981
FBgn0004003	wbl	2R:15136900-15138422	+	2R:19249395-19250917	+	Yes	2.805	4.648
FBgn0004009	wg	2L:7307159-7316265	+	2L:7307159-7316265	+	Yes	-0.747	0.066
FBgn0004028	wupA	X:17999601-18010955	-	X:18105568-18116922	-	Yes	7.57	8.757
FBgn0004034	y	X:250542-255278	+	X:356509-361245	+	No	-1.416	-2.797
FBgn0004045	Yp1	X:9947844-9949531	+	X:10053811-10055498	+	Yes	12.345	0.657
FBgn0004047	Yp3	X:13653579-13655580	+	X:13759546-13761547	+	Yes	11.551	2.548
FBgn0004049	yrt	3R:9254589-9260706	-	3R:13428867-13434984	-	Yes	3.594	2.841
FBgn0004050	z	X:2341802-2344583	+	X:2447769-2450550	+	Yes	4.626	3.337
FBgn0004052	Z600	3L:15502161-15502613	+	3L:15509061-15509513	+	Yes	-2.188	-1.941
FBgn0004053	zen	3R:2578586-2579916	-	3R:6752864-6754194	-	No	-0.626	-7.647
FBgn0004054	zen2	3R:2568857-2569858	-	3R:6743135-6744136	-	No	-6.446	-8.79
FBgn0004055	uzip	2R:20899585-20919260	+	2R:25012062-25031737	+	Yes	3.596	4.346
FBgn0004057	Zw	X:19561285-19566386	+	X:19667252-19672353	+	Yes	3.55	4.654
FBgn0004066	Prosalpha4	X:16170303-16171620	+	X:16276270-16277587	+	Yes	7.466	6.089
FBgn0004087	Dhfr	3R:12306889-12307600	+	3R:16481167-16481878	+	Yes	5.446	3.738
FBgn0004101	bs	2R:20230384-20263996	+	2R:24342861-24376473	+	Yes	2.206	1.165
FBgn0004102	oc	X:8524192-8544714	-	X:8630159-8650681	-	Yes	-0.469	0.978
FBgn0004103	Pp1-87B	3R:8249343-8251639	-	3R:12423621-12425917	-	Yes	6.389	5.81
FBgn0004106	cdc2	2L:10384739-10386262	-	2L:10384739-10386262	-	Yes	6.741	2.944
FBgn0004107	cdc2c	3R:16561345-16564136	+	3R:20735623-20738414	+	Yes	4.883	0.452
FBgn0004108	Nrt	3L:16759172-16770565	+	3L:16766072-16777465	+	Yes	3.241	2.424
FBgn0004110	tin	3R:17204699-17207692	+	3R:21378977-21381970	+	No	-5.091	-5.387
FBgn0004117	Tm2	3R:11135915-11140919	+	3R:15310193-15315197	+	Yes	6.744	7.766
FBgn0004118	nAChRbeta2	3R:20334950-20340828	-	3R:24509228-24515106	-	Yes	0.121	1.656
FBgn0004132	boca	2R:3453378-3454243	-	2R:7565873-7566738	-	Yes	5.581	4.356
FBgn0004133	blow	2R:3467993-3474584	-	2R:7580488-7587079	-	Yes	1.869	3.138
FBgn0004143	nullo	X:6943509-6944354	+	X:7049476-7050321	+	No	-6.027	-9.313
FBgn0004167	kst	3L:3336860-3368133	+	3L:3336860-3368133	+	Yes	5.411	5.776
FBgn0004168	5-HT1A	2R:14954660-15009463	+	2R:19067155-19121958	+	Yes	-0.143	1.473
FBgn0004169	up	X:13487507-13496611	-	X:13593474-13602578	-	Yes	7.558	8.825
FBgn0004170	sc	X:290093-291530	+	X:396060-397497	+	No	-3.822	-6.946
FBgn0004171	Mst98Cb	3R:24118520-24119585	+	3R:28292798-28293863	+	Yes	-6.673	7.161
FBgn0004172	Mst84Da	3R:3191572-3191984	+	3R:7365850-7366262	+	Yes	-4.768	9.609
FBgn0004173	Mst84Db	3R:3190882-3191349	-	3R:7365160-7365627	-	Yes	-5.61	9.055
FBgn0004174	Mst84Dc	3R:3189976-3190395	-	3R:7364254-7364673	-	Yes	-5.148	8.903
FBgn0004175	Mst84Dd	3R:3189029-3189495	-	3R:7363307-7363773	-	Yes	-6.221	8.312
FBgn0004177	mts	2L:7827650-7833576	+	2L:7827650-7833576	+	Yes	6.987	5.889
FBgn0004179	Csp	3L:22260482-22266845	+	3L:22267382-22273745	+	Yes	5.383	5.132
FBgn0004181	Peb	2R:21062649-21064238	-	2R:25175126-25176715	-	Yes	-1.271	11.354
FBgn0004183	snRNA:U1:82Eb	3R:773655-773818	-	3R:4947933-4948096	-	Yes	4.142	-0.649
FBgn0004185	snRNA:U1:95Ca	3R:19685189-19685352	-	3R:23859467-23859630	-	Yes	1.632	-4.375
FBgn0004186	snRNA:U1:95Cb	3R:19653592-19653755	+	3R:23827870-23828033	+	Yes	2.473	-2.294
FBgn0004187	snRNA:U1:95Cc	3R:19652056-19652219	+	3R:23826334-23826497	+	Yes	6.075	5.356
FBgn0004188	snRNA:U6:96Aa	3R:20381810-20381916	+	3R:24556088-24556194	+	No	-8.409	-6.983
FBgn0004189	snRNA:U6:96Ab	3R:20382414-20382520	+	3R:24556692-24556798	+	No	-3.899	-7.654
FBgn0004190	snRNA:U6:96Ac	3R:20382937-20383043	+	3R:24557215-24557321	+	No	-8.631	-9.278
FBgn0004191	snRNA:U2:34ABa	2L:13211925-13212116	-	2L:13211925-13212116	-	Yes	4.264	2.653
FBgn0004192	snRNA:U2:34ABb	2L:13215839-13216030	+	2L:13215839-13216030	+	Yes	1.315	-2.493
FBgn0004197	Ser	3R:22997812-23019989	-	3R:27172090-27194267	-	Yes	-0.772	0.968
FBgn0004198	ct	X:7503181-7572892	+	X:7609148-7678859	+	Yes	1.363	2.232
FBgn0004227	nonA	X:16255602-16265580	+	X:16361569-16371547	+	Yes	2.71	2.33
FBgn0004228	mex1	3L:15510524-15512692	-	3L:15517424-15519592	-	Yes	4.596	5.078
FBgn0004237	Hrb87F	3R:9482568-9486253	-	3R:13656846-13660531	-	Yes	5.7	4.182
FBgn0004240	Dpt	2R:14753270-14753765	+	2R:18865765-18866260	+	Yes	4.82	4.807
FBgn0004242	Syt1	2L:2772327-2799979	-	2L:2772327-2799979	-	Yes	2.768	4.406
FBgn0004244	Rdl	3L:9138938-9175249	-	3L:9145838-9182149	-	Yes	0.804	2.62
FBgn0004359	T48	3R:22707456-22736719	+	3R:26881734-26910997	+	Yes	4.144	3.588
FBgn0004360	Wnt2	2R:5381671-5390693	+	2R:9494166-9503188	+	Yes	0.089	1.7
FBgn0004362	HmgD	2R:17588963-17604232	+	2R:21701458-21716727	+	Yes	8.169	4.475
FBgn0004363	porin	2L:10847227-10850848	-	2L:10847227-10850848	-	Yes	8.406	8.15
FBgn0004364	18w	2R:15999016-16004437	+	2R:20111511-20116932	+	Yes	3.16	3.841
FBgn0004367	mei-41	X:16285731-16293883	+	X:16391698-16399850	+	Yes	3.162	0.833
FBgn0004368	Ptp4E	X:4833161-4849949	+	X:4939128-4955916	+	Yes	4.335	3.112
FBgn0004369	Ptp99A	3R:25203368-25312853	+	3R:29377646-29487131	+	Yes	2.209	2.727
FBgn0004370	Ptp10D	X:11516048-11571371	+	X:11622015-11677338	+	Yes	3.959	3.414
FBgn0004372	aly	3L:3024129-3026521	-	3L:3024129-3026521	-	Yes	-6.149	1.918
FBgn0004373	fwd	3L:305393-319884	-	3L:305393-319884	-	Yes	5.111	4.914
FBgn0004374	neb	2L:20075757-20089698	+	2L:20075757-20089698	+	Yes	3.696	3.143
FBgn0004378	Klp61F	3L:1241568-1245910	-	3L:1241568-1245910	-	Yes	4.693	1.151
FBgn0004379	Klp67A	3L:9355736-9360146	-	3L:9362636-9367046	-	Yes	5.301	3.675
FBgn0004380	Klp64D	3L:5349964-5352492	-	3L:5356864-5359392	-	Yes	4.916	4.179
FBgn0004381	Klp68D	3L:11788714-11791975	+	3L:11795614-11798875	+	Yes	4.875	3.699
FBgn0004387	Klp98A	3R:23373497-23384867	-	3R:27547775-27559145	-	Yes	3.845	3.93
FBgn0004389	bnk	3R:27019084-27020111	+	3R:31193362-31194389	+	No	-4.611	-8.642
FBgn0004390	RasGAP1	3L:9832193-9848385	-	3L:9839093-9855285	-	Yes	4.64	3.226
FBgn0004391	shtd	X:15349577-15356474	-	X:15455544-15462441	-	Yes	3.599	2.072
FBgn0004394	pdm2	2L:12657165-12686306	+	2L:12657165-12686306	+	Yes	-0.862	-0.802
FBgn0004395	unk	3R:18975375-18983584	-	3R:23149653-23157862	-	Yes	4.151	3.563
FBgn0004396	CrebA	3L:15528495-15546314	+	3L:15535395-15553214	+	Yes	3.061	3.596
FBgn0004397	Vinc	X:2108380-2116600	-	X:2214347-2222567	-	Yes	3.581	3.584
FBgn0004400	rhi	2R:13515996-13521021	-	2R:17628491-17633516	-	Yes	4.784	-0.313
FBgn0004401	Pep	3L:17631203-17638136	-	3L:17638103-17645036	-	Yes	6.905	5.426
FBgn0004403	RpS14a	X:7827775-7828710	+	X:7933742-7934677	+	Yes	9.552	8.37
FBgn0004404	RpS14b	X:7828931-7829825	+	X:7934898-7935792	+	Yes	7.922	7.051
FBgn0004406	tam	2L:13823980-13827772	-	2L:13823980-13827772	-	Yes	3.905	1.859
FBgn0004407	DNApol-gamma35	2L:13831482-13833105	-	2L:13831482-13833105	-	No	-9.966	-9.966
FBgn0004414	msopa	3L:22075820-22076467	+	3L:22082720-22083367	+	Yes	-6.193	7.584
FBgn0004419	me31B	2L:10239341-10242172	+	2L:10239341-10242172	+	Yes	10.082	6.067
FBgn0004425	LysB	3L:1207371-1207981	+	3L:1207371-1207981	+	Yes	6.445	5.561
FBgn0004426	LysC	3L:1210485-1210971	+	3L:1210485-1210971	+	Yes	5.027	4.114
FBgn0004427	LysD	3L:1210717-1211196	-	3L:1210717-1211196	-	Yes	8.748	7.912
FBgn0004428	LysE	3L:1212827-1213406	+	3L:1212827-1213406	+	Yes	4.23	4.722
FBgn0004429	LysP	3L:1218082-1218696	-	3L:1218082-1218696	-	Yes	3.487	3.523
FBgn0004430	LysS	3L:1227747-1228238	+	3L:1227747-1228238	+	No	-4.055	-3.768
FBgn0004431	LysX	3L:1194739-1195302	-	3L:1194739-1195302	-	Yes	0.848	0.677
FBgn0004432	Cyp1	X:16211706-16214403	-	X:16317673-16320370	-	Yes	9.501	8.14
FBgn0004435	Galphaq	2R:8500245-8510702	+	2R:12612740-12623197	+	Yes	3.115	4.125
FBgn0004436	UbcD6	3R:774477-778404	-	3R:4948755-4952682	-	Yes	5.976	6.113
FBgn0004449	Ten-m	3L:22286144-22400963	-	3L:22293044-22407863	-	Yes	3.284	3.995
FBgn0004456	mew	X:13108442-13152523	-	X:13214409-13258490	-	Yes	3.759	4.032
FBgn0004462	Pk17E	X:18682497-18700090	+	X:18788464-18806057	+	Yes	5.28	4.344
FBgn0004463	RpIII128	2R:7926546-7930128	+	2R:12039041-12042623	+	Yes	4.306	2.738
FBgn0004465	Su(P)	3L:16603762-16605299	-	3L:16610662-16612199	-	Yes	5.497	4.548
FBgn0004507	GlyP	2L:2130813-2137296	+	2L:2130813-2137296	+	Yes	7.664	8.047
FBgn0004509	Fur1	3R:21173153-21298780	-	3R:25347431-25473058	-	Yes	4.096	4.102
FBgn0004510	Ets97D	3R:22736497-22738608	-	3R:26910775-26912886	-	Yes	4.735	2.812
FBgn0004511	dy	X:11663802-11672817	-	X:11769769-11778784	-	No	-4.524	-5.541
FBgn0004512	Mdr49	2R:8827828-8833852	-	2R:12940323-12946347	-	Yes	4.037	5.272
FBgn0004513	Mdr65	3L:6233600-6238846	-	3L:6240500-6245746	-	Yes	2.012	2.996
FBgn0004514	Oct-TyrR	3L:22028103-22058379	+	3L:22035003-22065279	+	Yes	-0.371	0.883
FBgn0004516	Gad1	3L:4074077-4088744	-	3L:4074077-4088744	-	Yes	3.612	5.399
FBgn0004552	Akh	3L:4141467-4142070	+	3L:4141467-4142070	+	Yes	1.318	2.626
FBgn0004554	Edg91	3R:13436578-13437233	-	3R:17610856-17611511	-	No	-1.519	-2.553
FBgn0004556	Dbp73D	3L:16721596-16723918	-	3L:16728496-16730818	-	Yes	5.026	2.269
FBgn0004567	slp2	2L:3836840-3839185	+	2L:3836840-3839185	+	Yes	-1.031	0.062
FBgn0004569	aos	3L:16463486-16476750	-	3L:16470386-16483650	-	Yes	2.591	2.827
FBgn0004573	5-HT7	3R:26793958-26842597	-	3R:30968236-31016875	-	Yes	-1.042	0.558
FBgn0004574	Rop	3L:4136359-4138996	-	3L:4136359-4138996	-	Yes	5.589	5.792
FBgn0004575	Syn	3R:6016411-6048164	+	3R:10190689-10222442	+	Yes	2.162	3.91
FBgn0004577	Pxd	3R:12840298-12853709	+	3R:17014576-17027987	+	No	-2.859	-3.029
FBgn0004580	Cbp53E	2R:12861432-12883562	+	2R:16973927-16996057	+	Yes	3.738	5.332
FBgn0004581	bgcn	2R:19740793-19746444	-	2R:23853270-23858921	-	Yes	-2.441	2.92
FBgn0004583	ex	2L:431227-448701	+	2L:431227-448701	+	Yes	1.915	2.555
FBgn0004584	Rrp1	2L:2969773-2972508	-	2L:2969773-2972508	-	Yes	5.469	3.052
FBgn0004587	B52	3R:9487033-9492613	+	3R:13661311-13666891	+	Yes	5.454	4.189
FBgn0004588	Eig71Ea	3L:15642226-15642761	-	3L:15649126-15649661	-	No	-8.944	-7.894
FBgn0004589	Eig71Eb	3L:15643036-15643641	+	3L:15649936-15650541	+	No	-8.951	-0.836
FBgn0004590	Eig71Ec	3L:15644579-15645354	-	3L:15651479-15652254	-	No	-9.16	-7.806
FBgn0004591	Eig71Ed	3L:15645637-15646196	+	3L:15652537-15653096	+	No	-8.654	-8.39
FBgn0004592	Eig71Ee	3L:15647572-15649110	-	3L:15654472-15656010	-	No	-7.954	-8.008
FBgn0004593	Eig71Ef	3L:15649755-15650490	-	3L:15656655-15657390	-	No	-9.383	-8.217
FBgn0004594	Eig71Eg	3L:15650728-15651258	+	3L:15657628-15658158	+	No	-8.984	-5.048
FBgn0004595	pros	3R:7154202-7233349	+	3R:11328480-11407627	+	Yes	1.335	3.091
FBgn0004597	CycC	3R:10714726-10715927	-	3R:14889004-14890205	-	Yes	4.772	3.158
FBgn0004598	Fur2	X:16267119-16275815	+	X:16373086-16381782	+	Yes	5.787	3.809
FBgn0004606	zfh1	3R:26591648-26614924	+	3R:30765926-30789202	+	Yes	1.881	1.302
FBgn0004607	zfh2	4:522436-561500	+	4:501810-540874	+	Yes	1.507	2.903
FBgn0004611	Plc21C	2L:305935-355566	+	2L:305935-355566	+	Yes	3.678	3.547
FBgn0004618	gl	3R:14193649-14198460	-	3R:18367927-18372738	-	Yes	-0.576	0.93
FBgn0004619	GluRIA	3L:6617132-6628159	+	3L:6624032-6635059	+	Yes	-0.296	1.2
FBgn0004620	GluRIIA	2L:5555072-5558994	+	2L:5555072-5558994	+	Yes	0.864	2.087
FBgn0004622	TkR99D	3R:25776518-25795169	-	3R:29950796-29969447	-	Yes	-0.609	0.751
FBgn0004623	Gbeta76C	3L:19680737-19683092	+	3L:19687637-19689992	+	Yes	5.196	6.534
FBgn0004629	Cys	3R:10394825-10395366	-	3R:14569103-14569644	-	Yes	7.57	8.536
FBgn0004635	rho	3L:1463811-1468944	+	3L:1463811-1468944	+	Yes	2.221	3.523
FBgn0004636	R	3L:1859115-1862239	-	3L:1859115-1862239	-	Yes	5.41	4.236
FBgn0004638	drk	2R:9382727-9390346	-	2R:13495222-13502841	-	Yes	5.713	5.037
FBgn0004643	Zw10	X:2498230-2500857	+	X:2604197-2606824	+	Yes	5.769	3.169
FBgn0004644	hh	3R:18953891-18967628	-	3R:23128169-23141906	-	Yes	0.347	1.226
FBgn0004646	ogre	X:6867653-6885351	-	X:6973620-6991318	-	Yes	4.063	3.944
FBgn0004647	N	X:3028903-3066254	+	X:3134870-3172221	+	Yes	4.524	2.516
FBgn0004648	svr	X:390479-403105	+	X:496446-509072	+	Yes	4.765	4.542
FBgn0004649	yl	X:14087247-14093991	+	X:14193214-14199958	+	Yes	8.174	-1.776
FBgn0004650	fs(1)N	X:1216546-1223471	+	X:1322513-1329438	+	Yes	6.037	1.507
FBgn0004652	fru	3R:14239995-14371308	-	3R:18414273-18545586	-	Yes	0.289	1.364
FBgn0004654	Pgd	X:2039169-2042599	+	X:2145136-2148566	+	Yes	6.777	7.019
FBgn0004655	wapl	X:2043969-2053016	-	X:2149936-2158983	-	Yes	4.124	2.217
FBgn0004656	fs(1)h	X:7931841-7955469	-	X:8037808-8061436	-	Yes	3.63	3.151
FBgn0004657	mys	X:7955678-7964270	+	X:8061645-8070237	+	Yes	5.172	4.896
FBgn0004666	sim	3R:8883477-8903846	+	3R:13057755-13078124	+	Yes	2.477	-0.237
FBgn0004687	Mlc-c	X:5513169-5516572	-	X:5619136-5622539	-	Yes	6.996	6.527
FBgn0004698	mus210	2R:11199015-11205744	+	2R:15311510-15318239	+	Yes	5.658	4.132
FBgn0004777	Ccp84Ag	3R:2512450-2513761	+	3R:6686728-6688039	+	No	-4.201	-5.641
FBgn0004778	Ccp84Af	3R:2515324-2515961	-	3R:6689602-6690239	-	No	-8.325	-7.048
FBgn0004779	Ccp84Ae	3R:2516609-2517480	-	3R:6690887-6691758	-	No	-4.213	-7.321
FBgn0004780	Ccp84Ad	3R:2518454-2519239	+	3R:6692732-6693517	+	No	-6.824	-7.904
FBgn0004781	Ccp84Ac	3R:2520870-2521993	-	3R:6695148-6696271	-	No	-7.849	-8.486
FBgn0004782	Ccp84Ab	3R:2527690-2528599	-	3R:6701968-6702877	-	No	-6.478	-7.425
FBgn0004783	Ccp84Aa	3R:2529806-2530625	+	3R:6704084-6704903	+	No	-7.41	-8.298
FBgn0004784	inaC	2R:12786040-12789080	+	2R:16898535-16901575	+	Yes	4.622	6.045
FBgn0004795	retn	2R:19520133-19542343	+	2R:23632610-23654820	+	Yes	5.761	3.563
FBgn0004797	mdy	2L:16816660-16826964	+	2L:16816660-16826964	+	Yes	4.846	4.09
FBgn0004811	fs(2)ltoPP43	2L:19792773-19795851	-	2L:19792773-19795851	-	Yes	4.614	3.294
FBgn0004828	His3.3B	X:9046556-9050702	-	X:9152523-9156669	-	Yes	8.362	7.628
FBgn0004832	Xpac	X:3996988-3998230	-	X:4102955-4104197	-	Yes	4.229	3.558
FBgn0004837	Su(H)	2L:15039488-15043334	+	2L:15039488-15043334	+	Yes	3.752	2.323
FBgn0004838	Hrb27C	2L:6920704-6932057	+	2L:6920704-6932057	+	Yes	6.934	6.081
FBgn0004839	otk	2R:7888978-7907351	-	2R:12001473-12019846	-	Yes	0.256	1.035
FBgn0004841	TkR86C	3R:6563314-6576950	-	3R:10737592-10751228	-	Yes	-1.907	-0.131
FBgn0004842	RYa-R	3R:22822702-22883657	+	3R:26996980-27057935	+	Yes	-1.536	-0.114
FBgn0004852	Ac76E	3L:19932387-19971060	+	3L:19939287-19977960	+	Yes	2.814	3.896
FBgn0004854	B-H2	X:17208614-17218208	+	X:17314581-17324175	+	Yes	-0.862	1.409
FBgn0004855	RpII15	3R:10134811-10135900	+	3R:14309089-14310178	+	Yes	4.95	3.468
FBgn0004856	Bx42	X:8997903-9000637	-	X:9103870-9106604	-	Yes	5.798	4.181
FBgn0004858	elB	2L:14390628-14409549	-	2L:14390628-14409549	-	Yes	2.148	3.072
FBgn0004859	ci	4:68336-77667	-	4:47710-57041	-	Yes	3.243	3.498
FBgn0004860	ph-d	X:2009760-2017319	-	X:2115727-2123286	-	Yes	2.209	1.354
FBgn0004861	ph-p	X:2020243-2032404	-	X:2126210-2138371	-	Yes	1.328	1.889
FBgn0004862	bap	3R:17214602-17216171	+	3R:21388880-21390449	+	Yes	-1.695	-0.638
FBgn0004863	C15	3R:17325708-17338536	+	3R:21499986-21512814	+	Yes	-2.097	-0.263
FBgn0004864	hop	X:11254963-11262131	-	X:11360930-11368098	-	Yes	3.259	2.226
FBgn0004865	Eip78C	3L:21219709-21259603	+	3L:21226609-21266503	+	Yes	-0.321	0.948
FBgn0004867	RpS2	2L:9896265-9897552	-	2L:9896265-9897552	-	Yes	9.769	8.005
FBgn0004868	Gdi	2L:9491176-9494876	-	2L:9491176-9494876	-	Yes	7.261	6.588
FBgn0004870	bab1	3L:1036369-1101089	-	3L:1036369-1101089	-	Yes	-1.882	-0.611
FBgn0004872	piwi	2L:10982205-10987420	-	2L:10982205-10987420	-	Yes	6.471	0.191
FBgn0004875	enc	3L:3818679-3842326	+	3L:3818679-3842326	+	Yes	4.054	3.541
FBgn0004876	cdi	3R:14870604-14919992	-	3R:19044882-19094270	-	Yes	4.691	5.056
FBgn0004878	cas	3R:1538697-1542527	-	3R:5712975-5716805	-	No	-2.65	-8.211
FBgn0004880	scrt	3L:3983896-3994003	+	3L:3983896-3994003	+	Yes	0.789	2.445
FBgn0004882	orb	3R:19086332-19106578	-	3R:23260610-23280856	-	Yes	5.358	3.953
FBgn0004885	tok	3R:20545419-20574847	+	3R:24719697-24749125	+	Yes	3.303	4.293
FBgn0004888	Scsalpha	3L:3814211-3818383	+	3L:3814211-3818383	+	Yes	7.774	7.709
FBgn0004889	tws	3R:5951851-5965494	-	3R:10126129-10139772	-	Yes	4.763	3.844
FBgn0004892	sob	2L:3578013-3580769	-	2L:3578013-3580769	-	Yes	-0.071	1.059
FBgn0004893	bowl	2L:3771700-3784121	+	2L:3771700-3784121	+	Yes	2.382	3.095
FBgn0004895	fd64A	3L:4018878-4021279	+	3L:4018878-4021279	+	No	-4.228	-2.11
FBgn0004896	fd59A	2R:18755682-18758229	+	2R:22868159-22870706	+	Yes	-1.476	0.008
FBgn0004897	fd96Ca	3R:20908406-20910600	+	3R:25082684-25084878	+	No	-4.854	-3.348
FBgn0004898	fd96Cb	3R:20920734-20921821	+	3R:25095012-25096099	+	Yes	-2.369	-0.911
FBgn0004901	Prat	3R:3735320-3737501	-	3R:7909598-7911779	-	Yes	5.515	2.332
FBgn0004903	Rb97D	3R:22697851-22701464	-	3R:26872129-26875742	-	Yes	4.25	4.478
FBgn0004907	14-3-3zeta	2R:5987182-5997192	+	2R:10099677-10109687	+	Yes	8.01	8.032
FBgn0004908	Arl2	3R:4166822-4167594	+	3R:8341100-8341872	+	Yes	4.41	4.556
FBgn0004910	Eip63F-1	3L:3909973-3935617	-	3L:3909973-3935617	-	Yes	4.1	5.067
FBgn0004911	Eip63F-2	3L:3934718-3935992	+	3L:3934718-3935992	+	Yes	-1.814	-0.492
FBgn0004913	Gnf1	3R:732344-735803	+	3R:4906622-4910081	+	Yes	5.751	3.985
FBgn0004914	Hnf4	2L:8687226-8709611	-	2L:8687226-8709611	-	Yes	4.611	4.607
FBgn0004915	TfIIB	2L:10431338-10433116	+	2L:10431338-10433116	+	Yes	5.306	4.584
FBgn0004919	gol	2R:20960150-20971870	-	2R:25072627-25084347	-	Yes	2.794	4.22
FBgn0004921	Ggamma1	2R:4788909-4792296	+	2R:8901404-8904791	+	Yes	6.145	7.085
FBgn0004924	Top1	X:15213512-15222062	+	X:15319479-15328029	+	Yes	6.257	3.886
FBgn0004926	eIF-2beta	3L:12518193-12519831	-	3L:12525093-12526731	-	Yes	8.022	6.555
FBgn0004956	os	X:18199387-18203324	-	X:18305354-18309291	-	No	-1.889	-1.501
FBgn0004957	por	X:18271554-18273887	-	X:18377521-18379854	-	Yes	3.037	1.497
FBgn0004959	phm	X:18579799-18582466	+	X:18685766-18688433	+	Yes	0.317	-1.549
FBgn0005198	gig	3L:20122281-20132110	+	3L:20129181-20139010	+	Yes	3.592	3.013
FBgn0005278	Sam-S	2L:106903-114432	+	2L:106903-114432	+	Yes	7.772	6.61
FBgn0005322	nmd	2L:10302173-10303947	-	2L:10302173-10303947	-	Yes	5.886	4.827
FBgn0005355	Su(fu)	3R:8515595-8517190	-	3R:12689873-12691468	-	Yes	4.839	3.327
FBgn0005386	ash1	3L:19583873-19591855	-	3L:19590773-19598755	-	Yes	4.151	3.2
FBgn0005390	fs(1)M3	X:5852240-5858280	-	X:5958207-5964247	-	Yes	6.213	-2.738
FBgn0005391	Yp2	X:9944984-9946669	-	X:10050951-10052636	-	Yes	11.492	0.102
FBgn0005411	U2af50	X:16250729-16253072	-	X:16356696-16359039	-	Yes	6.786	5.364
FBgn0005427	ewg	X:162542-173751	-	X:268509-279718	-	Yes	4.127	3.234
FBgn0005533	RpS17	3L:9421895-9422921	-	3L:9428795-9429821	-	Yes	10.819	9.545
FBgn0005536	Mbs	3L:16045059-16075126	+	3L:16051959-16082026	+	Yes	4.214	4.837
FBgn0005558	ey	4:718315-741799	+	4:697689-721173	+	Yes	-0.171	1.163
FBgn0005561	sv	4:1109424-1133943	+	4:1088798-1113317	+	Yes	0.574	2.016
FBgn0005564	Shal	3L:19559951-19577668	-	3L:19566851-19584568	-	Yes	1.628	2.932
FBgn0005585	Crc	3R:5454413-5456573	-	3R:9628691-9630851	-	Yes	8.52	8.188
FBgn0005586	Rab3	2R:6608840-6616708	-	2R:10721335-10729203	-	Yes	2.209	3.894
FBgn0005590	scw	2L:19699379-19700968	-	2L:19699379-19700968	-	No	-3.912	-7.246
FBgn0005592	btl	3L:14068872-14076329	+	3L:14075772-14083229	+	Yes	0.717	1.369
FBgn0005593	RpL7	2L:10201004-10202321	+	2L:10201004-10202321	+	Yes	10.51	9.152
FBgn0005596	yem	3R:24944052-24948601	-	3R:29118330-29122879	-	Yes	5.054	2.347
FBgn0005612	Sox14	2R:19866324-19872700	+	2R:23978801-23985177	+	Yes	2.695	2.911
FBgn0005613	Sox15	2R:10088895-10099918	-	2R:14201390-14212413	-	Yes	-1.236	0.198
FBgn0005614	trpl	2R:5641202-5653023	+	2R:9753697-9765518	+	Yes	4.513	5.838
FBgn0005616	msl-2	2L:3462218-3466112	-	2L:3462218-3466112	-	Yes	1.706	2.86
FBgn0005617	msl-1	2L:18683720-18688800	-	2L:18683720-18688800	-	Yes	5.689	3.393
FBgn0005619	Hdc	2R:6125493-6133582	+	2R:10237988-10246077	+	Yes	0.19	1.726
FBgn0005624	Psc	2R:8853502-8868499	-	2R:12965997-12980994	-	Yes	2.004	0.147
FBgn0005626	ple	3L:6706456-6712625	-	3L:6713356-6719525	-	Yes	2.891	3.88
FBgn0005630	lola	2R:6369399-6430796	-	2R:10481894-10543291	-	Yes	5.264	3.925
FBgn0005631	robo	2R:18580029-18588475	-	2R:22692524-22700970	-	Yes	0.867	2.042
FBgn0005632	faf	3R:27602742-27616403	+	3R:31777020-31790681	+	Yes	5.385	4.878
FBgn0005633	fln	3L:19982651-19984320	-	3L:19989551-19991220	-	Yes	6.406	7.153
FBgn0005636	nvy	2R:20163257-20178607	+	2R:24275734-24291084	+	Yes	0.426	2.569
FBgn0005638	slbo	2R:20219045-20221830	-	2R:24331522-24334307	-	Yes	-0.231	0.539
FBgn0005640	Eip63E	3L:3515751-3610521	+	3L:3515751-3610521	+	Yes	3.943	3.844
FBgn0005642	wdn	3R:24633705-24637059	-	3R:28807983-28811337	-	Yes	5.193	3.053
FBgn0005648	Pabp2	2R:4018936-4021879	+	2R:8131431-8134374	+	Yes	5.106	3.889
FBgn0005649	Rox8	3R:19868778-19873987	-	3R:24043056-24048265	-	Yes	6.332	4.799
FBgn0005654	lat	2R:9090233-9094052	-	2R:13202728-13206547	-	No	-9.966	-9.966
FBgn0005655	PCNA	2R:16149259-16150388	-	2R:20261754-20262883	-	Yes	6.913	1.515
FBgn0005658	Ets65A	3L:6090717-6117013	+	3L:6097617-6123913	+	Yes	-1.322	0.273
FBgn0005659	Ets98B	3R:23562260-23574088	+	3R:27736538-27748366	+	Yes	1.985	3.075
FBgn0005660	Ets21C	2L:544925-552923	-	2L:544925-552923	-	Yes	-1.849	-0.471
FBgn0005664	Cry	2L:11944129-11947131	+	2L:11944129-11947131	+	Yes	1.286	2.121
FBgn0005666	bt	4:745026-797100	+	4:724400-776474	+	Yes	6.282	7.592
FBgn0005670	Cyp4d1	X:2053178-2056213	-	X:2159145-2162180	-	Yes	3.308	2.962
FBgn0005671	Vha55	3R:8449484-8453551	-	3R:12623762-12627829	-	Yes	6.837	6.644
FBgn0005672	spi	2L:19567900-19577315	-	2L:19567900-19577315	-	Yes	4.854	4.844
FBgn0005674	Aats-glupro	3R:19777858-19784113	-	3R:23952136-23958391	-	Yes	5.432	4.221
FBgn0005677	dac	2L:16466512-16485998	-	2L:16466512-16485998	-	Yes	-0.181	1.737
FBgn0005683	pie	2L:10420625-10422780	-	2L:10420625-10422780	-	Yes	4.361	1.55
FBgn0005694	Aef1	3L:21426522-21431739	+	3L:21433422-21438639	+	Yes	4.68	2.987
FBgn0005695	gcl	2R:4611763-4616504	+	2R:8724258-8728999	+	Yes	6.516	3.289
FBgn0005696	DNApol-alpha73	3R:23064885-23066950	+	3R:27239163-27241228	+	Yes	5.107	-0.269
FBgn0005771	noc	2L:14490859-14494019	+	2L:14490859-14494019	+	Yes	3.798	4.436
FBgn0005775	Con	3L:4936758-5079033	-	3L:4936758-5079033	-	Yes	0.6	2.155
FBgn0005777	PpD3	3R:5573597-5576816	+	3R:9747875-9751094	+	Yes	5.854	4.61
FBgn0005778	PpD5	2R:17929172-17930450	-	2R:22041667-22042945	-	No	-8.636	3.488
FBgn0005779	PpD6	2L:3109672-3110998	+	2L:3109672-3110998	+	Yes	-7.378	3.162
FBgn0008635	betaCOP	X:18275582-18279275	-	X:18381549-18385242	-	Yes	5.661	5.268
FBgn0008636	hbn	2R:16842173-16848414	-	2R:20954668-20960909	-	Yes	-1.847	-0.152
FBgn0008646	E5	3R:9693067-9702894	-	3R:13867345-13877172	-	Yes	-1.89	-0.701
FBgn0008651	lbl	3R:17235701-17259855	-	3R:21409979-21434133	-	Yes	-1.353	0.526
FBgn0010014	CanB	X:5226532-5228482	+	X:5332499-5334449	+	Yes	2.352	3.728
FBgn0010015	CanA1	3R:26865096-26872543	+	3R:31039374-31046821	+	Yes	1.469	2.752
FBgn0010019	Cyp4g1	X:361090-363368	-	X:467057-469335	-	Yes	11.261	13.053
FBgn0010038	GstD2	3R:8197693-8198426	+	3R:12371971-12372704	+	Yes	2.745	2.959
FBgn0010039	GstD3	3R:8198790-8199535	+	3R:12373068-12373813	+	Yes	5.145	5.09
FBgn0010040	GstD4	3R:8199822-8200546	+	3R:12374100-12374824	+	Yes	-0.306	-1.271
FBgn0010041	GstD5	3R:8201455-8202294	+	3R:12375733-12376572	+	Yes	1.439	2.937
FBgn0010042	GstD6	3R:8202850-8203629	+	3R:12377128-12377907	+	No	-2.106	-2.656
FBgn0010043	GstD7	3R:8204222-8204977	+	3R:12378500-12379255	+	Yes	1.235	1.474
FBgn0010044	GstD8	3R:8205730-8206537	+	3R:12380008-12380815	+	Yes	1.282	2.216
FBgn0010051	Itp-r83A	3R:1342839-1365133	+	3R:5517117-5539411	+	Yes	3.65	3.808
FBgn0010052	Jhe	2R:12007298-12010278	+	2R:16119793-16122773	+	Yes	-0.483	1.184
FBgn0010053	Jheh1	2R:14740939-14742592	-	2R:18853434-18855087	-	Yes	5.577	6.727
FBgn0010078	RpL23	2R:18741906-18743217	+	2R:22854383-22855694	+	Yes	11.495	10.205
FBgn0010097	gammaTub37C	2L:19183863-19185726	-	2L:19183863-19185726	-	Yes	5.613	-4.264
FBgn0010100	Acon	2L:21168570-21173185	+	2L:21168570-21173185	+	Yes	8.227	8.993
FBgn0010105	comm	3L:15714611-15721530	-	3L:15721511-15728430	-	Yes	0.894	2.501
FBgn0010109	dpn	2R:4116476-4119835	-	2R:8228971-8232330	-	No	-0.912	-5.326
FBgn0010113	hdc	3R:26103654-26198104	+	3R:30277932-30372382	+	Yes	2.117	1.429
FBgn0010114	hig	2R:5115290-5134754	-	2R:9227785-9247249	-	Yes	2.472	4.137
FBgn0010173	RpA-70	3R:4087842-4090173	-	3R:8262120-8264451	-	Yes	7.039	4.86
FBgn0010194	Wnt5	X:18395434-18399438	-	X:18501401-18505405	-	Yes	2.023	0.861
FBgn0010197	Gyc32E	2L:11138759-11149101	-	2L:11138759-11149101	-	No	-3.023	-1.15
FBgn0010198	RpS15Aa	X:13229670-13231738	-	X:13335637-13337705	-	Yes	10.408	9.061
FBgn0010213	Sod2	2R:12660290-12661420	-	2R:16772785-16773915	-	Yes	6.687	6.799
FBgn0010215	alpha-Cat	3L:23311746-23331200	-	3L:23318646-23338100	-	Yes	6.468	5.466
FBgn0010217	ATPsyn-beta	4:1052110-1055543	+	4:1031484-1034917	+	Yes	10.071	10.278
FBgn0010220	Dbp45A	2R:4975339-4977307	+	2R:9087834-9089802	+	Yes	4.644	3.279
FBgn0010222	Nmdmc	3R:4868230-4876277	-	3R:9042508-9050555	-	Yes	4.766	4.115
FBgn0010223	Galphaf	3L:16655657-16661034	-	3L:16662557-16667934	-	Yes	3.447	3.645
FBgn0010225	Gel	3R:60939-66779	+	3R:4235217-4241057	+	Yes	6.515	7.297
FBgn0010226	GstS1	2R:12980751-12987006	-	2R:17093246-17099501	-	Yes	6.259	7.946
FBgn0010228	HmgZ	2R:17584993-17595366	-	2R:21697488-21707861	-	Yes	5.522	5.91
FBgn0010235	Klc	3L:12739716-12743156	-	3L:12746616-12750056	-	Yes	6.018	5.409
FBgn0010238	Lac	2R:8340695-8353135	+	2R:12453190-12465630	+	Yes	4.208	3.901
FBgn0010240	Lcch3	X:15819138-15822562	+	X:15925105-15928529	+	Yes	0.778	2.283
FBgn0010241	Mdr50	2R:10134471-10140102	+	2R:14246966-14252597	+	Yes	2.489	3.347
FBgn0010246	Myo61F	3L:1318480-1329617	+	3L:1318480-1329617	+	Yes	5.521	5.501
FBgn0010247	Parp	3RHet:1935206-2026815	+	3R:3461351-3587054	-	Yes	6.201	5.041
FBgn0010258	Rbp4	3R:9480278-9482116	-	3R:13654556-13656394	-	Yes	-2.556	3.652
FBgn0010263	Rbp9	2L:2954762-2968434	+	2L:2954762-2968434	+	Yes	4.273	5.875
FBgn0010265	RpS13	2L:8363477-8364662	-	2L:8363477-8364662	-	Yes	9.389	8.119
FBgn0010269	Dsor1	X:9141375-9144070	+	X:9247342-9250037	+	Yes	4.952	3.015
FBgn0010278	Ssrp	2R:19693884-19696527	-	2R:23806361-23809004	-	Yes	6.12	3.533
FBgn0010280	Taf4	3L:16106312-16114751	+	3L:16113212-16121651	+	Yes	4.96	4.088
FBgn0010282	TfIIFalpha	3R:2206189-2208326	+	3R:6380467-6382604	+	Yes	5.791	4.378
FBgn0010287	Trf	2L:8072895-8073948	+	2L:8072895-8073948	+	Yes	4.317	3.471
FBgn0010288	Uch	2L:2212738-2214211	-	2L:2212738-2214211	-	Yes	7.044	6.687
FBgn0010292	bys	X:7795913-7797676	+	X:7901880-7903643	+	Yes	6.076	3.588
FBgn0010294	ng2	X:3134059-3134604	-	X:3240026-3240571	-	No	-9.122	-9.49
FBgn0010295	ng3	X:3135524-3136117	-	X:3241491-3242084	-	No	-8.816	-9.256
FBgn0010296	ng4	X:3137987-3138253	-	X:3243954-3244220	-	No	-9.083	-9.304
FBgn0010300	brat	2L:19133816-19179758	+	2L:19133816-19179758	+	Yes	4.709	2.038
FBgn0010303	hep	X:12973238-12984467	-	X:13079205-13090434	-	Yes	3.728	2.943
FBgn0010309	pigeon	2L:19186043-19189938	+	2L:19186043-19189938	+	Yes	4.614	3.155
FBgn0010313	corto	3R:903501-912794	-	3R:5077779-5087072	-	Yes	3.077	2.836
FBgn0010314	Cks30A	2L:9330763-9331981	+	2L:9330763-9331981	+	Yes	4.907	1.853
FBgn0010315	CycD	X:15800855-15803709	-	X:15906822-15909676	-	Yes	5.834	2.764
FBgn0010316	dap	2R:5599826-5603761	+	2R:9712321-9716256	+	Yes	6.075	3.219
FBgn0010317	CycJ	3L:3466428-3468098	+	3L:3466428-3468098	+	Yes	5.39	0.113
FBgn0010323	Gsc	2L:583544-594685	-	2L:583544-594685	-	No	-4.815	-2.44
FBgn0010328	woc	3R:23082317-23089777	-	3R:27256595-27264055	-	Yes	6.105	3.934
FBgn0010329	Tbh	X:7889730-7921427	+	X:7995697-8027394	+	Yes	-0.25	1.331
FBgn0010333	Rac1	3L:1300879-1302683	-	3L:1300879-1302683	-	Yes	5.254	4.252
FBgn0010339	128up	2R:7924803-7926356	+	2R:12037298-12038851	+	Yes	6.468	4.78
FBgn0010340	140up	3R:9949885-9951270	-	3R:14124163-14125548	-	Yes	3.843	3.142
FBgn0010341	Cdc42	X:19591124-19593971	+	X:19697091-19699938	+	Yes	6.22	5.231
FBgn0010342	Map60	2R:5478372-5480249	+	2R:9590867-9592744	+	Yes	6.06	2.559
FBgn0010348	Arf79F	3L:22861480-22865331	-	3L:22868380-22872231	-	Yes	7.669	7.066
FBgn0010350	CdsA	3L:8120862-8124775	+	3L:8127762-8131675	+	Yes	5.899	6.383
FBgn0010352	Nc73EF	3L:16947922-16961824	+	3L:16954822-16968724	+	Yes	6.843	7.896
FBgn0010355	Taf1	3R:2472611-2481770	+	3R:6646889-6656048	+	Yes	4.21	3.564
FBgn0010356	Taf5	2R:6764817-6767178	-	2R:10877312-10879673	-	Yes	4.672	2.893
FBgn0010357	betaTry	2R:7233830-7234900	+	2R:11346325-11347395	+	Yes	9.323	9.444
FBgn0010358	deltaTry	2R:7242824-7243633	+	2R:11355319-11356128	+	Yes	1.833	1.295
FBgn0010359	gammaTry	2R:7236566-7237375	-	2R:11349061-11349870	-	No	-9.847	-9.883
FBgn0010379	Akt1	3R:11924950-11931392	+	3R:16099228-16105670	+	Yes	5.3	4.723
FBgn0010380	AP-1-2beta	X:19625037-19628614	+	X:19731004-19734581	+	Yes	5.401	4.555
FBgn0010381	Drs	3L:3369556-3369942	+	3L:3369556-3369942	+	Yes	9.123	6.635
FBgn0010382	CycE	2L:15727581-15748150	-	2L:15727581-15748150	-	Yes	5.382	0.961
FBgn0010383	Cyp18a1	X:18582571-18587075	-	X:18688538-18693042	-	Yes	3.728	2.642
FBgn0010385	Def	2R:5941683-5942081	-	2R:10054178-10054576	-	Yes	5.259	2.743
FBgn0010387	Dbi	3L:7124963-7126563	+	3L:7131863-7133463	+	Yes	8.188	9.399
FBgn0010388	Dro	2R:10633466-10634219	+	2R:14745961-14746714	+	Yes	2.811	2.478
FBgn0010389	htl	3R:13870938-13878706	-	3R:18045216-18052984	-	Yes	2.528	3.163
FBgn0010391	Gtp-bp	X:11020910-11023120	-	X:11126877-11129087	-	Yes	5.864	5.267
FBgn0010395	Itgbetanu	2L:21053033-21058044	+	2L:21053033-21058044	+	Yes	3.064	3.524
FBgn0010397	LamC	2R:10458315-10463276	-	2R:14570810-14575771	-	Yes	4.843	4.619
FBgn0010398	Lrr47	2L:10517335-10519269	+	2L:10517335-10519269	+	Yes	3.438	1.666
FBgn0010399	Nmdar1	3R:1334564-1349050	-	3R:5508842-5523328	-	Yes	-0.2	1.475
FBgn0010401	Os-C	3R:3804681-3805336	+	3R:7978959-7979614	+	Yes	3.744	5.062
FBgn0010403	Obp83b	3R:1801899-1802539	-	3R:5976177-5976817	-	Yes	3.963	5.584
FBgn0010406	RNaseX25	3L:7963688-7965549	+	3L:7970588-7972449	+	Yes	5.693	5.059
FBgn0010407	Ror	2L:10251843-10254686	+	2L:10251843-10254686	+	Yes	-0.322	1.119
FBgn0010408	RpS9	3L:9502893-9504631	-	3L:9509793-9511531	-	Yes	9.952	8.401
FBgn0010409	RpL18A	2R:13433911-13434967	-	2R:17546406-17547462	-	Yes	10.639	9.335
FBgn0010411	RpS18	2R:16151484-16152353	+	2R:20263979-20264848	+	Yes	10.472	9.214
FBgn0010412	RpS19a	X:16531927-16533282	+	X:16637894-16639249	+	Yes	9.211	7.85
FBgn0010414	SerT	2R:20292118-20298597	-	2R:24404595-24411074	-	Yes	-0.209	1.439
FBgn0010415	Sdc	2R:17279907-17368681	-	2R:21392402-21481176	-	Yes	5.503	5.614
FBgn0010416	TH1	X:16282853-16285471	-	X:16388820-16391438	-	Yes	4.907	3.302
FBgn0010417	Taf6	3L:19592188-19594482	+	3L:19599088-19601382	+	Yes	4.256	3.175
FBgn0010421	TfIIFbeta	3R:6592344-6593526	-	3R:10766622-10767804	-	Yes	6.021	4.172
FBgn0010422	TfIIS	2L:15058919-15060757	-	2L:15058919-15060757	-	Yes	5.359	3.972
FBgn0010423	TpnC47D	2R:7161350-7162791	-	2R:11273845-11275286	-	Yes	3.623	3.991
FBgn0010424	TpnC73F	3L:17039163-17041490	+	3L:17046063-17048390	+	Yes	3.818	3.832
FBgn0010425	epsilonTry	2R:7232742-7233571	-	2R:11345237-11346066	-	Yes	8.248	7.577
FBgn0010431	mtrm	3L:8406112-8407203	+	3L:8413012-8414103	+	Yes	8.064	0.927
FBgn0010433	ato	3R:4103774-4104996	+	3R:8278052-8279274	+	No	-6.972	-7.827
FBgn0010434	cora	2R:15116568-15131256	+	2R:19229063-19243751	+	Yes	4.39	5.024
FBgn0010435	emp	2R:20863979-20873593	-	2R:24976456-24986070	-	Yes	4.352	5.956
FBgn0010438	mtSSB	3R:12029916-12030972	-	3R:16204194-16205250	-	Yes	7.02	3.319
FBgn0010441	pll	3R:23076853-23078904	-	3R:27251131-27253182	-	Yes	4.462	2.916
FBgn0010452	trn	3L:13107371-13111177	+	3L:13114271-13118077	+	Yes	1.267	1.709
FBgn0010453	Wnt4	2L:7255419-7277171	-	2L:7255419-7277171	-	Yes	-0.65	0.357
FBgn0010470	Fkbp14	2R:17374672-17385434	-	2R:21487167-21497929	-	Yes	4.829	5.167
FBgn0010473	tutl	2L:4283148-4323781	+	2L:4283148-4323781	+	Yes	0.91	2.259
FBgn0010482	l(2)01289	2R:2608606-2628177	-	2R:6721101-6740672	-	Yes	4.349	5.476
FBgn0010488	NAT1	2R:8803499-8811239	+	2R:12915994-12923734	+	Yes	7.211	6.382
FBgn0010497	dmGlut	2L:12027438-12034122	+	2L:12027438-12034122	+	Yes	6.306	4.653
FBgn0010501	Dcp-1	2R:19438836-19441070	+	2R:23551313-23553547	+	Yes	4.6	1.732
FBgn0010504	kermit	2R:4034423-4044159	-	2R:8146918-8156654	-	Yes	3.607	5.093
FBgn0010516	wal	2R:7576074-7578368	-	2R:11688569-11690863	-	Yes	6.873	6.681
FBgn0010520	Bka	2L:9895287-9896104	+	2L:9895287-9896104	+	Yes	5.787	3.264
FBgn0010531	Ccs	2R:6008991-6010079	-	2R:10121486-10122574	-	Yes	4.374	4.026
FBgn0010548	Aldh-III	2R:3354384-3364667	-	2R:7466879-7477162	-	Yes	5.446	6.398
FBgn0010549	l(2)03659	2R:5277670-5282786	+	2R:9390165-9395281	+	Yes	-0.724	-0.686
FBgn0010551	Phb2	2R:14706972-14709755	+	2R:18819467-18822250	+	Yes	6.713	5.772
FBgn0010575	sbb	2R:14165703-14244801	-	2R:18278198-18357296	-	Yes	3.501	2.767
FBgn0010583	dock	2L:825969-833241	+	2L:825969-833241	+	Yes	4.033	3.978
FBgn0010590	Prosbeta1	2R:11901310-11902292	-	2R:16013805-16014787	-	Yes	7.128	6.834
FBgn0010591	Sply	2R:12975946-12979463	-	2R:17088441-17091958	-	Yes	5.309	4.575
FBgn0010602	lwr	2L:540599-542580	-	2L:540599-542580	-	Yes	6.063	4.554
FBgn0010607	l(2)05714	2L:4970135-4973921	-	2L:4970135-4973921	-	Yes	5.057	2.917
FBgn0010611	Hmgs	2R:12223595-12228747	+	2R:16336090-16341242	+	Yes	5.489	5.346
FBgn0010612	l(2)06225	2L:10975522-10976399	-	2L:10975522-10976399	-	Yes	8.338	8.689
FBgn0010620	Sip1	2R:13282098-13292676	+	2R:17394593-17405171	+	Yes	5.092	4.64
FBgn0010621	Cct5	2R:8062307-8065021	+	2R:12174802-12177516	+	Yes	7.226	4.746
FBgn0010622	l(2)06496	2R:18948943-18950116	-	2R:23061420-23062593	-	Yes	4.615	3.893
FBgn0010638	Sec61beta	2R:10506276-10507186	+	2R:14618771-14619681	+	Yes	6.899	6.262
FBgn0010651	l(2)08717	2R:14684480-14691232	-	2R:18796975-18803727	-	Yes	4.123	4.807
FBgn0010660	Nup214	2R:18806460-18812265	-	2R:22918937-22924742	-	Yes	4.877	3.291
FBgn0010704	rti	2L:2226342-2231099	+	2L:2226342-2231099	+	Yes	5.848	5.672
FBgn0010741	l(3)01239	3L:11066392-11067488	-	3L:11073292-11074388	-	Yes	6.731	4.906
FBgn0010747	Srp54k	3L:5145778-5147877	+	3L:5152678-5154777	+	Yes	6.165	6.029
FBgn0010750	atms	3R:575757-603212	+	3R:4750035-4777490	+	Yes	5.268	3.889
FBgn0010762	simj	3L:10657839-10683834	+	3L:10664739-10690734	+	Yes	4.317	3.546
FBgn0010768	sqz	3R:14989933-14996298	+	3R:19164211-19170576	+	Yes	2.951	0.885
FBgn0010770	ppan	3R:16941976-16943621	+	3R:21116254-21117899	+	Yes	5.375	2.394
FBgn0010772	Xe7	3R:1490861-1495056	-	3R:5665139-5669334	-	Yes	3.745	3.882
FBgn0010774	Ref1	3R:2903626-2906109	-	3R:7077904-7080387	-	Yes	7.363	5.291
FBgn0010786	l(3)02640	3L:1334889-1339415	+	3L:1334889-1339415	+	Yes	6.482	5.697
FBgn0010803	Aats-trp	3R:5090749-5092626	-	3R:9265027-9266904	-	Yes	5.514	4.691
FBgn0010808	l(3)03670	3R:26878338-26879637	-	3R:31052616-31053915	-	Yes	6.706	6.771
FBgn0010812	unc-45	3R:3859023-3862374	+	3R:8033301-8036652	+	Yes	4.412	4.026
FBgn0010825	Gug	3L:8443022-8465769	+	3L:8449922-8472669	+	Yes	4.196	3.658
FBgn0010830	l(3)04053	3L:22731702-22734488	-	3L:22738602-22741388	-	Yes	3.978	2.688
FBgn0010877	l(3)05822	3R:14114588-14124601	-	3R:18288866-18298879	-	Yes	5.139	4.185
FBgn0010894	sinu	3L:5552570-5554698	-	3L:5559470-5561598	-	Yes	3.676	3.343
FBgn0010905	Spn	3L:2505245-2554292	-	3L:2505245-2554292	-	Yes	4.86	4.151
FBgn0010909	msn	3L:2554847-2586540	-	3L:2554847-2586540	-	Yes	5.37	4.487
FBgn0010926	l(3)07882	3R:13362654-13365685	-	3R:17536932-17539963	-	Yes	5.492	2.679
FBgn0011016	SsRbeta	3L:16122717-16124083	+	3L:16129617-16130983	+	Yes	7.002	6.175
FBgn0011020	Sas-4	3R:2977089-2979941	+	3R:7151367-7154219	+	Yes	4.371	1.457
FBgn0011202	dia	2L:20758144-20768053	+	2L:20758144-20768053	+	Yes	4.557	4.044
FBgn0011204	cue	3L:1503226-1517271	-	3L:1503226-1517271	-	Yes	6.341	5.352
FBgn0011205	fbl	3L:20377529-20385013	+	3L:20384429-20391913	+	Yes	5.46	5.924
FBgn0011206	bol	3L:9090729-9127505	-	3L:9097629-9134405	-	Yes	2.611	5.635
FBgn0011207	pelo	2L:9700810-9708883	+	2L:9700810-9708883	+	Yes	5.819	4.666
FBgn0011211	blw	2R:18686604-18689685	+	2R:22799099-22802180	+	Yes	8.761	9.08
FBgn0011217	eff	3R:10558136-10567041	-	3R:14732414-14741319	-	Yes	7.882	7.55
FBgn0011224	heph	3R:27672709-27841242	-	3R:31846987-32015520	-	Yes	3.707	3.749
FBgn0011225	jar	3R:20078548-20096955	-	3R:24252826-24271233	-	Yes	5.614	6.313
FBgn0011227	ox	2R:8644638-8645034	-	2R:12757133-12757529	-	Yes	8.293	9.006
FBgn0011230	poe	2L:8054322-8071624	-	2L:8054322-8071624	-	Yes	5.806	6.198
FBgn0011232	scat	2L:9431405-9435341	+	2L:9431405-9435341	+	Yes	4.24	3.102
FBgn0011236	ken	2R:19757796-19764965	+	2R:23870273-23877442	+	Yes	4.024	2.824
FBgn0011239	ms(2)35Ci	2L:15292468-15294136	+	2L:15292468-15294136	+	Yes	-8.191	3.671
FBgn0011241	cbx	2R:5752015-5762577	-	2R:9864510-9875072	-	Yes	4.314	4.018
FBgn0011244	Hsp60B	2L:728362-730564	+	2L:728362-730564	+	Yes	-4.114	7.165
FBgn0011259	Sema-1a	2L:8542147-8672041	+	2L:8542147-8672041	+	Yes	1.324	1.965
FBgn0011260	Sema-2a	2R:12387683-12420964	+	2R:16500178-16533459	+	Yes	5.289	3.027
FBgn0011270	Pglym87	3R:8057367-8058451	-	3R:12231645-12232729	-	Yes	-6.284	7.072
FBgn0011272	RpL13	2L:9967313-9968645	+	2L:9967313-9968645	+	Yes	9.692	8.417
FBgn0011273	Acam	3R:21637633-21638856	+	3R:25811911-25813134	+	No	-9.966	-9.966
FBgn0011274	Dif	2L:17413248-17433161	-	2L:17413248-17433161	-	Yes	3.383	4.364
FBgn0011276	HLH3B	X:2574232-2575756	-	X:2680199-2681723	-	No	-5.955	-4.269
FBgn0011277	HLH4C	X:4539160-4541447	-	X:4645127-4647414	-	No	-4.048	-2.63
FBgn0011278	lbe	3R:17267299-17272259	-	3R:21441577-21446537	-	Yes	-1.684	0.684
FBgn0011279	Obp69a	3L:12389271-12390057	+	3L:12396171-12396957	+	Yes	1.845	3.725
FBgn0011280	Obp19d	X:20290640-20292006	+	X:20419613-20420979	+	Yes	6.053	7.161
FBgn0011281	Obp83a	3R:1797877-1800967	-	3R:5972155-5975245	-	Yes	3.159	4.715
FBgn0011282	Obp84a	3R:3076447-3077679	-	3R:7250725-7251957	-	Yes	0.811	2.243
FBgn0011283	Obp28a	2L:7496791-7497365	-	2L:7496791-7497365	-	Yes	2.961	3.863
FBgn0011284	RpS4	3L:13034856-13037334	+	3L:13041756-13044234	+	Yes	10.016	8.618
FBgn0011286	RyR	2R:4747869-4775602	+	2R:8860364-8888097	+	Yes	2.808	4.13
FBgn0011288	Snap25	3L:24067280-24292305	+	3L:24074180-24299205	+	Yes	4.394	6.025
FBgn0011289	TfIIA-L	3R:23076834-23082185	+	3R:27251112-27256463	+	Yes	6.19	5.467
FBgn0011290	Taf12	3R:7504108-7505412	-	3R:11678386-11679690	-	Yes	3.41	2.744
FBgn0011291	Taf11	2L:9762424-9763262	-	2L:9762424-9763262	-	Yes	4.253	2.821
FBgn0011293	a10	3L:17016223-17016841	-	3L:17023123-17023741	-	Yes	3.829	5.099
FBgn0011294	a5	2L:1329161-1329993	+	2L:1329161-1329993	+	Yes	1.746	3.203
FBgn0011296	l(2)efl	2R:19572174-19573066	-	2R:23684651-23685543	-	Yes	5.933	6.815
FBgn0011297	l(2)not	2R:19592962-19597315	-	2R:23705439-23709792	-	Yes	4.044	2.884
FBgn0011300	babo	2R:4839844-4850301	+	2R:8952339-8962796	+	Yes	3.566	3.163
FBgn0011305	Rsf1	2L:10261795-10263554	-	2L:10261795-10263554	-	Yes	4.328	4.189
FBgn0011327	Uch-L5	3L:9468593-9470065	-	3L:9475493-9476965	-	Yes	6.561	6.33
FBgn0011335	l(3)j2D3	3L:12109201-12111155	+	3L:12116101-12118055	+	Yes	3.971	2.257
FBgn0011336	OstStt3	3R:20892434-20895359	-	3R:25066712-25069637	-	Yes	5.629	5.723
FBgn0011361	mtacp1	3L:1329949-1331631	+	3L:1329949-1331631	+	Yes	7.577	7.515
FBgn0011455	l(3)neo18	3L:12130596-12131684	-	3L:12137496-12138584	-	Yes	7.625	8.067
FBgn0011474	pr-set7	3R:10141760-10146216	+	3R:14316038-14320494	+	Yes	4.075	2.454
FBgn0011476	l(3)neo43	3R:11103703-11104390	-	3R:15277981-15278668	-	Yes	4.877	4.527
FBgn0011481	Ssdp	3R:14018216-14025317	-	3R:18192494-18199595	-	Yes	4.435	3.503
FBgn0011509	SrpRbeta	3L:8712049-8713325	-	3L:8718949-8720225	-	Yes	5.695	4.343
FBgn0011554	etaTry	2R:7228018-7228928	-	2R:11340513-11341423	-	Yes	4.068	3.88
FBgn0011555	thetaTry	2R:7229219-7230265	-	2R:11341714-11342760	-	Yes	6.711	6.589
FBgn0011556	zetaTry	2R:7226691-7227637	-	2R:11339186-11340132	-	Yes	4.321	4.427
FBgn0011559	Acp36DE	2L:18356047-18359026	-	2L:18356047-18359026	-	Yes	-3.521	9.755
FBgn0011566	Bzd	X:2500713-2502909	-	X:2606680-2608876	-	Yes	4.236	2.534
FBgn0011569	can	3L:10257009-10260211	-	3L:10263909-10267111	-	Yes	-5.033	2.405
FBgn0011570	cpb	2L:1704902-1706962	+	2L:1704902-1706962	+	Yes	5.273	4.082
FBgn0011571	caz	X:16182843-16187553	+	X:16288810-16293520	+	Yes	4.514	2.802
FBgn0011573	Cdc37	3L:1795392-1797307	+	3L:1795392-1797307	+	Yes	6.124	5.481
FBgn0011576	Cyp4d2	X:2070039-2072761	+	X:2176006-2178728	+	Yes	3.059	4.497
FBgn0011581	Ms	3R:20167273-20169547	+	3R:24341551-24343825	+	Yes	2.456	4.353
FBgn0011582	Dop1R1	3R:9991101-10040532	-	3R:14165379-14214810	-	Yes	-1.539	0.26
FBgn0011584	Trp1	2L:10009381-10013170	+	2L:10009381-10013170	+	Yes	5.914	6.35
FBgn0011586	e(r)	X:8798177-8800281	-	X:8904144-8906248	-	Yes	6.187	4.271
FBgn0011589	Elk	2R:13761444-13814200	+	2R:17873939-17926695	+	Yes	0.023	1.459
FBgn0011591	fng	3L:20918991-20942612	-	3L:20925891-20949512	-	Yes	3.062	3.311
FBgn0011592	fra	2R:8416558-8451689	+	2R:12529053-12564184	+	Yes	3.491	2.829
FBgn0011596	fzo	3R:19027366-19029756	-	3R:23201644-23204034	-	Yes	0.737	5.222
FBgn0011603	ine	2L:4468000-4477022	-	2L:4468000-4477022	-	Yes	2.814	3.933
FBgn0011604	Iswi	2R:8524176-8528133	+	2R:12636671-12640628	+	Yes	5.138	4.032
FBgn0011606	Klp3A	X:2493191-2498085	-	X:2599158-2604052	-	Yes	4.769	4.373
FBgn0011638	La	2L:20348393-20350012	-	2L:20348393-20350012	-	Yes	7.519	4.966
FBgn0011640	lark	3L:7332366-7334993	+	3L:7339266-7341893	+	Yes	5.511	4.03
FBgn0011642	Zyx	4:1077991-1085627	-	4:1057365-1065001	-	Yes	5.47	5.386
FBgn0011648	Mad	2L:3146056-3159643	-	2L:3146056-3159643	-	Yes	5.251	4.005
FBgn0011653	mas	3L:4161666-4167464	-	3L:4161666-4167464	-	No	-5.354	-5.684
FBgn0011655	Med	3R:27436768-27441097	+	3R:31611046-31615375	+	Yes	3.426	2.562
FBgn0011656	Mef2	2R:5801001-5846363	-	2R:9913496-9958858	-	Yes	3.095	3.387
FBgn0011659	Mlh1	2R:4057779-4059906	+	2R:8170274-8172401	+	Yes	4.009	1.141
FBgn0011660	Pms2	2R:11255579-11259025	-	2R:15368074-15371520	-	Yes	4.687	3.034
FBgn0011661	Moe	X:8767045-8792365	-	X:8873012-8898332	-	Yes	6.916	6.241
FBgn0011666	msi	3R:21341840-21434145	+	3R:25516118-25608423	+	Yes	2.78	2.769
FBgn0011668	Mst57Da	3R:21657297-21657621	-	3R:25831575-25831899	-	Yes	-1.882	11.337
FBgn0011669	Mst57Db	3R:21656442-21656636	-	3R:25830720-25830914	-	Yes	-0.609	12.923
FBgn0011670	Mst57Dc	3R:21655043-21655420	-	3R:25829321-25829698	-	Yes	-1.977	9.547
FBgn0011672	Mvl	3R:16877105-16886522	-	3R:21051383-21060800	-	Yes	4.737	3.849
FBgn0011674	insc	2R:16708767-16723533	-	2R:20821262-20836028	-	Yes	3.139	1.891
FBgn0011676	Nos	2L:10804274-10837511	-	2L:10804274-10837511	-	Yes	-0.187	1.187
FBgn0011692	pav	3L:4242734-4246233	+	3L:4242734-4246233	+	Yes	5.35	1.063
FBgn0011693	Pdh	3L:16346333-16347397	-	3L:16353233-16354297	-	Yes	6.536	7.956
FBgn0011694	PebII	2R:21061091-21061753	-	2R:25173568-25174230	-	Yes	-1.823	11.267
FBgn0011695	PebIII	2R:19913695-19915041	+	2R:24026172-24027518	+	Yes	8.03	9.499
FBgn0011701	repo	3R:14061914-14065324	+	3R:18236192-18239602	+	Yes	1.086	2.565
FBgn0011703	RnrL	2L:10325026-10327943	-	2L:10325026-10327943	-	Yes	6.824	1.051
FBgn0011704	RnrS	2R:7870650-7872898	-	2R:11983145-11985393	-	Yes	7.781	2.65
FBgn0011705	rost	2L:8985936-8989539	-	2L:8985936-8989539	-	Yes	5.761	3.34
FBgn0011706	rpr	3L:18390635-18391535	-	3L:18397535-18398435	-	Yes	-0.492	0.538
FBgn0011708	Syx5	2L:16307346-16309274	+	2L:16307346-16309274	+	Yes	5.645	5.383
FBgn0011710	2019-09-01	X:21229313-21232715	+	X:21358286-21361688	+	Yes	6.001	3.97
FBgn0011715	Snr1	3R:1296648-1298476	+	3R:5470926-5472754	+	Yes	5.685	3.34
FBgn0011722	Tig	2L:6415179-6423310	-	2L:6415179-6423310	-	Yes	4.06	4.67
FBgn0011723	byn	3L:11920793-11929019	+	3L:11927693-11935919	+	Yes	-0.362	0.805
FBgn0011725	twin	3R:20022615-20047687	-	3R:24196893-24221965	-	Yes	5.309	5.27
FBgn0011726	tsr	2R:19931976-19934328	-	2R:24044453-24046805	-	Yes	9.561	7.888
FBgn0011737	Wee1	2L:6911090-6914138	-	2L:6911090-6914138	-	Yes	4.67	4.556
FBgn0011739	wts	3R:26615347-26632341	-	3R:30789625-30806619	-	Yes	3.835	3.445
FBgn0011740	alpha-Man-II	3R:5238270-5242986	+	3R:9412548-9417264	+	Yes	4.374	3.736
FBgn0011741	Arp6	X:15629807-15631153	-	X:15735774-15737120	-	Yes	4.677	3.525
FBgn0011742	Arp2	X:16442323-16448001	-	X:16548290-16553968	-	Yes	6.36	4.873
FBgn0011743	Arp53D	2R:12661751-12663181	+	2R:16774246-16775676	+	Yes	-6.704	5.656
FBgn0011745	Arp1	3R:8517465-8519954	+	3R:12691743-12694232	+	Yes	6.336	5.61
FBgn0011746	ana	2R:4949800-4965059	+	2R:9062295-9077554	+	Yes	0.915	2.206
FBgn0011747	Ank	4:135700-150475	-	4:115074-129849	-	Yes	6.806	6.485
FBgn0011754	PhKgamma	X:11589170-11598427	+	X:11695137-11704394	+	Yes	5.455	5.385
FBgn0011758	B-H1	X:17291511-17297311	+	X:17397478-17403278	+	Yes	-1.192	0.05
FBgn0011760	ctp	X:4581833-4596067	+	X:4687800-4702034	+	Yes	6.321	5.695
FBgn0011761	dhd	X:5206204-5207158	+	X:5312171-5313125	+	Yes	11.557	1.71
FBgn0011762	DNApol-alpha50	3L:8333414-8337504	+	3L:8340314-8344404	+	Yes	4.375	0.762
FBgn0011763	Dp	2R:9109938-9115707	+	2R:13222433-13228202	+	Yes	5.931	4.195
FBgn0011764	Dsp1	X:16227645-16234657	+	X:16333612-16340624	+	Yes	5.53	4.384
FBgn0011766	E2f	3R:17446026-17486593	-	3R:21620304-21660871	-	Yes	4.564	3.886
FBgn0011768	Fdh	3R:6696628-6698103	-	3R:10870906-10872381	-	Yes	6.98	5.912
FBgn0011769	Fdxh	3L:9363295-9364338	-	3L:9370195-9371238	-	Yes	3.768	3.341
FBgn0011770	Gip	X:10222910-10223905	-	X:10328877-10329872	-	Yes	6.678	6.516
FBgn0011771	Hem	3L:22277454-22281295	-	3L:22284354-22288195	-	Yes	4.642	3.549
FBgn0011774	Irbp	3R:7235769-7238162	+	3R:11410047-11412440	+	Yes	5.014	2.245
FBgn0011785	BRWD3	3R:20144722-20154341	+	3R:24319000-24328619	+	Yes	3.989	2.997
FBgn0011787	mRpL12	3L:8949891-8950684	+	3L:8956791-8957584	+	Yes	6.049	4.264
FBgn0011802	Gem3	3L:10452181-10456201	-	3L:10459081-10463101	-	Yes	4.861	3.336
FBgn0011812	Lcp1Psi	2R:4320391-4320889	-	2R:8432886-8433384	-	No	-8.511	-9.231
FBgn0011817	nmo	3L:7972146-8047247	+	3L:7979046-8054147	+	Yes	3.191	2.949
FBgn0011818	oaf	2L:2492955-2498846	+	2L:2492955-2498846	+	Yes	4.727	3.48
FBgn0011822	pcl	X:330172-331481	-	X:436139-437448	-	Yes	3.608	2.569
FBgn0011823	Pen	2L:10056900-10060095	+	2L:10056900-10060095	+	Yes	7.722	8.159
FBgn0011824	CG4038	2R:16983463-16984810	-	2R:21095958-21097305	-	Yes	5.221	1.982
FBgn0011826	Pp2B-14D	X:16448660-16454049	-	X:16554627-16560016	-	Yes	4.634	3.668
FBgn0011828	Pxn	3L:2601455-2630064	-	3L:2601455-2630064	-	Yes	2.711	3.206
FBgn0011829	Ret	2L:21182446-21198762	-	2L:21182446-21198762	-	Yes	-1.28	-0.153
FBgn0011832	Ser12	2L:2250431-2251275	-	2L:2250431-2251275	-	No	-2.649	-9.147
FBgn0011834	Ser6	X:20833632-20834532	-	X:20962605-20963505	-	Yes	5.421	5.223
FBgn0011836	Taf2	3L:9877511-9881783	-	3L:9884411-9888683	-	Yes	4.338	2.689
FBgn0011837	Tis11	X:12553448-12576587	+	X:12659415-12682554	+	Yes	5.317	4.407
FBgn0011840	tRNA:A:90C	3R:13445866-13445938	-	3R:17620144-17620216	-	No	-9.477	-9.784
FBgn0011844	tRNA:D2:69F	3L:13242647-13242718	+	3L:13249547-13249618	+	No	-4.9	-2.536
FBgn0011845	tRNA:D:96A	3R:20381024-20381095	+	3R:24555302-24555373	+	No	-8.252	-6.313
FBgn0011848	tRNA:E4:56Fa	2R:15615486-15615557	-	2R:19727981-19728052	-	No	-9.511	-9.407
FBgn0011849	tRNA:E4:56Fb	2R:15614965-15615036	-	2R:19727460-19727531	-	Yes	4.551	4.005
FBgn0011850	tRNA:E4:56Fc	2R:15613647-15613718	-	2R:19726142-19726213	-	No	-6.032	-7.765
FBgn0011851	tRNA:E4:62Aa	3L:1397695-1397766	+	3L:1397695-1397766	+	No	-9.966	-9.966
FBgn0011852	tRNA:E4:62Ab	3L:1397932-1398003	+	3L:1397932-1398003	+	No	-9.966	-9.966
FBgn0011853	tRNA:E4:62Ac	3L:1398169-1398240	+	3L:1398169-1398240	+	No	-9.966	-9.966
FBgn0011854	tRNA:E4:62Ad	3L:1401440-1401511	+	3L:1401440-1401511	+	No	-9.966	-9.966
FBgn0011855	tRNA:E4:62Ae	3L:1401781-1401852	+	3L:1401781-1401852	+	No	-9.384	-9.632
FBgn0011858	tRNA:F2:89BC	3R:12147125-12147197	+	3R:16321403-16321475	+	No	-9.499	-9.692
FBgn0011859	tRNA:G3:22BCa	2L:1938089-1938159	-	2L:1938089-1938159	-	No	-8.974	-8.739
FBgn0011860	tRNA:G3:22BCb	2L:2031692-2031762	+	2L:2031692-2031762	+	No	-8.581	-9.081
FBgn0011861	tRNA:G3:28D	2L:7872849-7872919	+	2L:7872849-7872919	+	No	-9.175	-9.145
FBgn0011862	tRNA:G3:35Ba	2L:14518091-14518161	+	2L:14518091-14518161	+	No	-9.793	-9.916
FBgn0011863	tRNA:G3:35Bb	2L:14518307-14518377	-	2L:14518307-14518377	-	No	-9.254	-9.564
FBgn0011864	tRNA:G3:35Bc	2L:14518621-14518691	-	2L:14518621-14518691	-	No	-8.679	-9.25
FBgn0011865	tRNA:G3:35Bd	2L:14530546-14530616	-	2L:14530546-14530616	-	No	-7.3	-8.846
FBgn0011866	tRNA:G3:35Be	2L:14530854-14530924	-	2L:14530854-14530924	-	No	-9.084	-9.458
FBgn0011867	tRNA:G3:53E	2R:12855513-12855583	+	2R:16968008-16968078	+	No	-9.177	-9.445
FBgn0011868	tRNA:G3:55E	2R:14527231-14527301	-	2R:18639726-18639796	-	No	-9.712	-9.518
FBgn0011869	tRNA:G3:56EFa	2R:16116986-16117056	+	2R:20229481-20229551	+	No	-8.695	-9.506
FBgn0011870	tRNA:G3:56EFb	2R:16120302-16120372	+	2R:20232797-20232867	+	No	-8.578	-7.32
FBgn0011871	tRNA:G3:57BCa	2R:17048861-17048931	-	2R:21161356-21161426	-	No	-5.836	-7.154
FBgn0011872	tRNA:G3:57BCb	2R:17070361-17070431	+	2R:21182856-21182926	+	No	-9.252	-8.978
FBgn0011877	tRNA:HPsi	2R:8224238-8224309	+	2R:12336733-12336804	+	No	-8.284	-8.453
FBgn0011878	tRNA:H:48F	2R:8223923-8223994	+	2R:12336418-12336489	+	No	-6.398	-6.477
FBgn0011879	tRNA:CR30233	2R:13279720-13279791	+	2R:17392215-17392286	+	No	-8.223	-9.238
FBgn0011880	tRNA:I:42A	2R:2053656-2053729	+	2R:6166151-6166224	+	No	-2.565	-4.419
FBgn0011881	tRNA:I:49Fa	2R:9317787-9317860	-	2R:13430282-13430355	-	No	-8.616	-8.98
FBgn0011882	tRNA:I:49Fb	2R:9318489-9318562	+	2R:13430984-13431057	+	No	-3.665	-4.891
FBgn0011883	tRNA:I:49Fc	2R:9318790-9318863	+	2R:13431285-13431358	+	No	-8.675	-9.143
FBgn0011884	tRNA:I:49Fd	2R:9319282-9319355	+	2R:13431777-13431850	+	No	-5.43	-6.652
FBgn0011885	tRNA:I:49Fe	2R:9319598-9319671	+	2R:13432093-13432166	+	No	-9.047	-9.065
FBgn0011887	tRNA:K2:42Aa	2R:2053489-2053561	+	2R:6165984-6166056	+	No	-9.178	-9.103
FBgn0011888	tRNA:K2:42Ab	2R:2052381-2052453	-	2R:6164876-6164948	-	No	-6.982	-5.802
FBgn0011889	tRNA:K2:42Ac	2R:2050186-2050258	-	2R:6162681-6162753	-	No	-3.718	-2.858
FBgn0011890	tRNA:K2:42Ad	2R:2059001-2059073	-	2R:6171496-6171568	-	Yes	-0.472	-1.291
FBgn0011891	tRNA:K2:42Ae	2R:2029877-2029949	-	2R:6142372-6142444	-	Yes	-0.058	1.452
FBgn0011892	tRNA:K2:42Ea	2R:2834313-2834385	-	2R:6946808-6946880	-	Yes	-2.487	-0.695
FBgn0011893	tRNA:K2:42Eb	2R:2835243-2835315	-	2R:6947738-6947810	-	Yes	-1.758	0.072
FBgn0011894	tRNA:K2:42Ec	2R:2835789-2835861	-	2R:6948284-6948356	-	Yes	0.455	1.454
FBgn0011895	tRNA:K2:42Ed	2R:2836638-2836710	-	2R:6949133-6949205	-	Yes	-0.879	-0.096
FBgn0011896	tRNA:K2:50C	2R:9423550-9423622	-	2R:13536045-13536117	-	No	-9.351	-9.042
FBgn0011897	tRNA:K2:56EF	2R:15690096-15690168	+	2R:19802591-19802663	+	No	-8.688	-8.626
FBgn0011902	tRNA:K5:29A	2L:8290727-8290799	+	2L:8290727-8290799	+	No	-9.476	-9.555
FBgn0011904	tRNA:K5:84ABa	3R:2648685-2648757	-	3R:6822963-6823035	-	No	-9.917	-9.868
FBgn0011905	tRNA:K5:87BC	3R:7957078-7957149	+	3R:12131356-12131427	+	No	-9.687	-9.864
FBgn0011906	tRNA:L2:44EF	2R:4570720-4570802	+	2R:8683215-8683297	+	No	-9.35	-8.129
FBgn0011909	tRNA:L3:49Fa	2R:9318200-9318320	-	2R:13430695-13430815	-	No	-6.748	-6.971
FBgn0011910	tRNA:L3:49Fb	2R:9320173-9320299	+	2R:13432668-13432794	+	No	-2.315	-5.07
FBgn0011915	tRNA:M2:48Ba	2R:7540154-7540226	+	2R:11652649-11652721	+	No	-8.43	-8.775
FBgn0011916	tRNA:M2:48Bb	2R:7548068-7548140	-	2R:11660563-11660635	-	No	-5.661	-4.854
FBgn0011919	tRNA:M2:83F	3R:2321761-2321833	-	3R:6496039-6496111	-	No	-9.74	-9.662
FBgn0011921	tRNA:M3:46A	2R:5548730-5548801	+	2R:9661225-9661296	+	No	-9.44	-9.2
FBgn0011927	tRNA:M3:70Fa	3L:14667042-14667113	-	3L:14673942-14674013	-	No	-9.04	-9.337
FBgn0011928	tRNA:M3:70Fb	3L:14667444-14667515	+	3L:14674344-14674415	+	No	-6.925	-7.727
FBgn0011931	tRNA:N5:42Aa	2R:2050024-2050097	+	2R:6162519-6162592	+	No	-7.983	-8.885
FBgn0011932	tRNA:N5:42Ab	2R:2049702-2049775	+	2R:6162197-6162270	+	No	-6.288	-9
FBgn0011933	tRNA:N5:42Ac	2R:2049528-2049601	-	2R:6162023-6162096	-	No	-8.352	-8.873
FBgn0011934	tRNA:N5:42Ad	2R:2077877-2077950	+	2R:6190372-6190445	+	No	-6.333	-7.572
FBgn0011935	tRNA:N5:42Ae	2R:2077634-2077707	-	2R:6190129-6190202	-	Yes	2.539	0.602
FBgn0011936	tRNA:N5:42Af	2R:2041011-2041084	-	2R:6153506-6153579	-	No	-9.966	-9.966
FBgn0011937	tRNA:N5:42Ag	2R:2040691-2040764	+	2R:6153186-6153259	+	No	-9.867	-9.864
FBgn0011938	tRNA:N5:42Ah	2R:2040108-2040181	-	2R:6152603-6152676	-	No	-9.385	-9.255
FBgn0011944	tRNA:P:90Ca	3R:13443832-13443903	-	3R:17618110-17618181	-	No	-8.399	-9.108
FBgn0011945	tRNA:P:90Cb	3R:13445683-13445754	+	3R:17619961-17620032	+	No	-9.512	-9.53
FBgn0011948	tRNA:R:12Ea	X:13910236-13910308	+	X:14016203-14016275	+	No	-9.753	-9.69
FBgn0011949	tRNA:R:12Eb	X:13910841-13910913	+	X:14016808-14016880	+	No	-9.81	-9.71
FBgn0011950	tRNA:R:12Ec	X:13911043-13911115	+	X:14017010-14017082	+	No	-9.299	-9.653
FBgn0011951	tRNA:R:12Ed	X:13911245-13911317	+	X:14017212-14017284	+	No	-8.864	-9.633
FBgn0011952	tRNA:R:12Ee	X:13908847-13908919	+	X:14014814-14014886	+	No	-9.253	-9.742
FBgn0011953	tRNA:R:12Ef	X:13997752-13997824	-	X:14103719-14103791	-	No	-9.605	-9.685
FBgn0011954	tRNA:R:19F	X:21103118-21103190	+	X:21232091-21232163	+	No	-6.63	-8.414
FBgn0011955	tRNA:R2:42Aa	2R:2066089-2066161	-	2R:6178584-6178656	-	No	-5.813	-8.508
FBgn0011956	tRNA:R2:42Ab	2R:2057112-2057184	+	2R:6169607-6169679	+	No	-9.366	-9.375
FBgn0011957	tRNA:R2:42Ac	2R:2049040-2049112	+	2R:6161535-6161607	+	No	-8.603	-8.941
FBgn0011958	tRNA:R2:42Ad	2R:2029670-2029742	+	2R:6142165-6142237	+	No	-9.101	-9.504
FBgn0011959	tRNA:R2:84Fa	3R:3966692-3966764	-	3R:8140970-8141042	-	No	-7.029	-7.494
FBgn0011960	tRNA:R2:84Fb	3R:3966449-3966521	-	3R:8140727-8140799	-	No	-8.107	-9.762
FBgn0011961	tRNA:R2:84Fc	3R:3966198-3966270	-	3R:8140476-8140548	-	No	-9.379	-9.504
FBgn0011962	tRNA:R2:84Fd	3R:3965945-3966017	-	3R:8140223-8140295	-	No	-7.318	-8.816
FBgn0011963	tRNA:R2:84Fe	3R:3965673-3965745	-	3R:8139951-8140023	-	No	-9.073	-9.561
FBgn0011965	tRNA:R:83AB	3R:1213950-1214022	+	3R:5388228-5388300	+	No	-9.303	-9.154
FBgn0011966	tRNA:R:85Ca	3R:4687602-4687674	+	3R:8861880-8861952	+	No	-9.392	-9.275
FBgn0011970	tRNA:S2b:86A	3R:6103776-6103857	-	3R:10278054-10278135	-	No	-8.791	-9.163
FBgn0011971	tRNA:S2b:88A	3R:9870247-9870328	-	3R:14044525-14044606	-	No	-6.88	-8.629
FBgn0011974	tRNA:S474:12Eh	X:13964674-13964755	+	X:14070641-14070722	+	No	-4.204	-4.386
FBgn0011975	tRNA:S4:12Ea	X:13909078-13909159	+	X:14015045-14015126	+	No	-5.221	-8.101
FBgn0011976	tRNA:S4:12Eb	X:13909478-13909559	+	X:14015445-14015526	+	No	-5.43	-8.871
FBgn0011977	tRNA:S4:12Ee	X:13997396-13997477	-	X:14103363-14103444	-	No	-8.952	-8.918
FBgn0011980	tRNA:S774:12Ec	X:13919142-13919223	-	X:14025109-14025190	-	No	-5.507	-8.286
FBgn0011981	tRNA:S774:12Ef	X:13998682-13998763	+	X:14104649-14104730	+	No	-5.867	-4.425
FBgn0011982	tRNA:S7:12Ed	X:13919599-13919680	-	X:14025566-14025647	-	Yes	1.757	-2.293
FBgn0011983	tRNA:S7:12Eg	X:14011762-14011843	-	X:14117729-14117810	-	No	-7.053	-8.137
FBgn0011984	tRNA:S7:23Ea	2L:3173003-3173084	-	2L:3173003-3173084	-	No	-9.595	-9.627
FBgn0011985	tRNA:S7:23Eb	2L:3169582-3169663	+	2L:3169582-3169663	+	No	-8.33	-8.386
FBgn0011986	tRNA:S7:64D	3L:5335184-5335265	+	3L:5342084-5342165	+	No	-9.535	-9.112
FBgn0011987	tRNA:SeC	2R:7245069-7245155	-	2R:11357564-11357650	-	No	-2.836	-2.95
FBgn0011993	tRNA:T:90Ca	3R:13450287-13450360	-	3R:17624565-17624638	-	No	-6.462	-7.895
FBgn0011994	tRNA:T:90Cb	3R:13450528-13450601	-	3R:17624806-17624879	-	No	-7.731	-8.275
FBgn0011998	tRNA:V3b:84Da	3R:3277782-3277854	+	3R:7452060-7452132	+	No	-9.162	-9.395
FBgn0011999	tRNA:V3b:84Db	3R:3277019-3277091	+	3R:7451297-7451369	+	No	-9.016	-9.565
FBgn0012000	tRNA:V3b:84Dc	3R:3297782-3297854	-	3R:7472060-7472132	-	No	-8.933	-9.451
FBgn0012001	tRNA:V3b:84Dd	3R:3301625-3301697	-	3R:7475903-7475975	-	No	-9.255	-9.554
FBgn0012002	tRNA:V3b:90BC	3R:13443483-13443555	+	3R:17617761-17617833	+	No	-9.213	-9.502
FBgn0012003	tRNA:V3b:92Ba	3R:15497999-15498071	-	3R:19672277-19672349	-	No	-9.726	-9.788
FBgn0012004	tRNA:V3b:92Bb	3R:15615844-15615916	+	3R:19790122-19790194	+	No	-9.683	-9.69
FBgn0012009	tRNA:V4:70BCa	3L:13426746-13426818	-	3L:13433646-13433718	-	No	-8.653	-8.736
FBgn0012010	tRNA:V4:70BCb	3L:13426148-13426220	+	3L:13433048-13433120	+	No	-9.435	-9.74
FBgn0012011	tRNA:V4:89BC	3R:12147412-12147484	+	3R:16321690-16321762	+	No	-9.532	-9.6
FBgn0012016	tRNA:Y1:22Fa	2L:2462593-2462686	+	2L:2462593-2462686	+	No	-8.444	-8.31
FBgn0012017	tRNA:Y1:22Fb	2L:2459924-2460044	-	2L:2459924-2460044	-	No	-8.721	-8.935
FBgn0012018	tRNA:Y1:28C	2L:7711476-7711661	+	2L:7711476-7711661	+	No	-9.312	-8.207
FBgn0012024	tRNA:Y1:85Aa	3R:4494803-4494896	-	3R:8669081-8669174	-	No	-7.832	-8.101
FBgn0012025	tRNA:Y1:85Ab	3R:4494334-4494427	-	3R:8668612-8668705	-	No	-7.097	-7.788
FBgn0012026	tRNA:Y1:85Ac	3R:4493838-4493930	-	3R:8668116-8668208	-	No	-3.165	-4.93
FBgn0012027	tRNA:Y1:85Ad	3R:4468423-4468515	-	3R:8642701-8642793	-	No	-6.69	-6.163
FBgn0012028	tRNA:Y1:85Ae	3R:4468055-4468147	-	3R:8642333-8642425	-	No	-7.829	-8.149
FBgn0012034	AcCoAS	3L:21263822-21273343	-	3L:21270722-21280243	-	Yes	6.909	7.489
FBgn0012036	Aldh	2L:9387389-9391567	+	2L:9387389-9391567	+	Yes	8.012	8.35
FBgn0012037	Ance	2L:13905645-13909212	+	2L:13905645-13909212	+	Yes	6.267	6.779
FBgn0012042	AttA	2R:10634867-10635720	+	2R:14747362-14748215	+	Yes	3.821	3.577
FBgn0012051	CalpA	2R:15312618-15318069	+	2R:19425113-19430564	+	Yes	4.224	4.494
FBgn0012058	Cdc27	3L:7238581-7242440	-	3L:7245481-7249340	-	Yes	4.693	4.363
FBgn0012344	Dh44	3R:5463904-5476428	+	3R:9638182-9650706	+	Yes	0.949	2.674
FBgn0013263	Trl	3L:14741029-14754149	-	3L:14747929-14761049	-	Yes	1.906	1.957
FBgn0013269	FK506-bp1	3R:11157306-11158855	-	3R:15331584-15333133	-	Yes	8.571	4.668
FBgn0013272	Gp150	2R:18205167-18216921	+	2R:22317662-22329416	+	Yes	7.086	7.417
FBgn0013275	Hsp70Aa	3R:7779885-7782266	-	3R:11954163-11956544	-	No	-7.375	-9.142
FBgn0013276	Hsp70Ab	3R:7784257-7786631	+	3R:11958535-11960909	+	No	-4.703	-6.642
FBgn0013277	Hsp70Ba	3R:8291175-8293498	-	3R:12465453-12467776	-	No	-6.855	-6.528
FBgn0013278	Hsp70Bb	3R:8331515-8333861	+	3R:12505793-12508139	+	Yes	-1.047	0.012
FBgn0013279	Hsp70Bc	3R:8334798-8337183	+	3R:12509076-12511461	+	No	-3.133	-2
FBgn0013300	Mst35Ba	2L:14879050-14881652	-	2L:14879050-14881652	-	Yes	-6.926	7.103
FBgn0013301	Mst35Bb	2L:14882101-14883721	-	2L:14882101-14883721	-	Yes	-6.428	7.776
FBgn0013303	Nca	3L:19984987-19990668	+	3L:19991887-19997568	+	Yes	6.328	6.015
FBgn0013305	Nmda1	2R:8764599-8767735	-	2R:12877094-12880230	-	Yes	5.215	5.65
FBgn0013307	Odc1	2R:3892329-3894177	+	2R:8004824-8006672	+	Yes	4.974	4.866
FBgn0013308	Odc2	2R:3894751-3896567	+	2R:8007246-8009062	+	Yes	-0.945	0.134
FBgn0013323	Ptth	2L:575711-576896	-	2L:575711-576896	-	Yes	-1.434	1.804
FBgn0013325	RpL11	2R:15329847-15331330	+	2R:19442342-19443825	+	Yes	9.686	8.436
FBgn0013334	Sap47	3R:11760822-11787846	+	3R:15935100-15962124	+	Yes	4.416	5.432
FBgn0013342	nSyb	3L:1630348-1637752	-	3L:1630348-1637752	-	Yes	3.133	4.817
FBgn0013343	Syx1A	3R:19927322-19931485	-	3R:24101600-24105763	-	Yes	3.74	4.033
FBgn0013347	TfIIA-S	3R:19716110-19716782	-	3R:23890388-23891060	-	Yes	6.168	5.292
FBgn0013348	TpnC41C	2R:952742-957715	-	2R:5065237-5070210	-	Yes	5.078	6.864
FBgn0013432	bcn92	X:2042496-2043680	-	X:2148463-2149647	-	Yes	4.647	3.606
FBgn0013433	beat-Ia	2L:16049965-16081684	+	2L:16049965-16081684	+	Yes	0.104	1.712
FBgn0013435	cdc2rk	2R:5954722-5956207	-	2R:10067217-10068702	-	Yes	3.523	2.337
FBgn0013467	igl	2R:11042942-11077797	+	2R:15155437-15190292	+	Yes	3.152	4.761
FBgn0013469	klu	3L:10974271-11002288	-	3L:10981171-11009188	-	Yes	0.255	1.176
FBgn0013531	MED20	2L:8071812-8072848	-	2L:8071812-8072848	-	Yes	3.949	2.602
FBgn0013548	l(2)dtl	2R:19590000-19592926	+	2R:23702477-23705403	+	Yes	4.727	0.656
FBgn0013563	Pex1	3L:14064992-14069223	+	3L:14071892-14076123	+	Yes	3.966	2.952
FBgn0013576	mtd	3R:1095838-1176165	-	3R:5270116-5350443	-	Yes	4.633	4.719
FBgn0013717	not	3L:18611405-18615229	-	3L:18618305-18622129	-	Yes	4.217	2.575
FBgn0013718	nuf	3L:14183970-14226350	+	3L:14190870-14233250	+	Yes	5.263	4.984
FBgn0013720	pck	X:1364699-1366358	+	X:1470666-1472325	+	Yes	4.37	3.584
FBgn0013725	phyl	2R:10314841-10319842	-	2R:14427336-14432337	-	Yes	-0.671	1.441
FBgn0013726	pnut	2R:4124776-4127802	+	2R:8237271-8240297	+	Yes	6.115	3.889
FBgn0013732	sced	2R:2544831-2548129	+	2R:6657326-6660624	+	Yes	4.315	0.944
FBgn0013733	shot	2R:9751742-9829615	-	2R:13864237-13942110	-	Yes	5.096	6.159
FBgn0013746	alien	2L:8993818-8997379	-	2L:8993818-8997379	-	Yes	5.11	4.014
FBgn0013749	Arf102F	4:1144793-1145951	+	4:1124167-1125325	+	Yes	7.239	6.502
FBgn0013750	Arf51F	2R:11210006-11212995	+	2R:15322501-15325490	+	Yes	6.119	5.374
FBgn0013751	Awh	3L:3846206-3861692	+	3L:3846206-3861692	+	Yes	-0.568	0.872
FBgn0013753	Bgb	3L:1639711-1640952	+	3L:1639711-1640952	+	Yes	5.257	3.179
FBgn0013755	Bro	3L:1647869-1648612	+	3L:1647869-1648612	+	No	-3.292	-1.909
FBgn0013756	Mtor	2R:7740122-7748707	+	2R:11852617-11861202	+	Yes	6.013	4.068
FBgn0013759	CASK	3R:17609122-17648396	-	3R:21783400-21822674	-	Yes	3.739	3.261
FBgn0013762	Cdk5	2R:11457033-11458922	-	2R:15569528-15571417	-	Yes	4.572	3.72
FBgn0013763	CG5210	2R:12578527-12581256	+	2R:16691022-16693751	+	Yes	7.63	7.487
FBgn0013764	Chi	2R:19919061-19921466	-	2R:24031538-24033943	-	Yes	5.14	3.751
FBgn0013765	cnn	2R:9326819-9337980	-	2R:13439314-13450475	-	Yes	5.011	5.229
FBgn0013767	Crz	3R:10140576-10141438	+	3R:14314854-14315716	+	Yes	0.4	1.769
FBgn0013770	Cp1	2R:9848180-9855486	+	2R:13960675-13967981	+	Yes	8.461	8.031
FBgn0013771	Cyp6a9	2R:10766861-10768877	-	2R:14879356-14881372	-	Yes	4.32	4.893
FBgn0013772	Cyp6a8	2R:10774676-10776515	-	2R:14887171-14889010	-	Yes	2.437	4.282
FBgn0013773	Cyp6a22	2R:10758871-10761210	+	2R:14871366-14873705	+	Yes	4.999	3.289
FBgn0013799	Deaf1	3L:19811274-19823786	+	3L:19818174-19830686	+	Yes	2.767	2.249
FBgn0013809	Dhc16F	X:17958516-17972505	+	X:18064483-18078472	+	Yes	-5.272	1.69
FBgn0013810	Dhc36C	2L:17501401-17525515	+	2L:17501401-17525515	+	Yes	0.434	3.764
FBgn0013811	Dhc62B	3L:1759172-1771758	-	3L:1759172-1771758	-	Yes	-2.837	1.597
FBgn0013812	Dhc93AB	3R:16850302-16868221	-	3R:21024580-21042499	-	Yes	-0.558	1.06
FBgn0013813	Dhc98D	3R:24312675-24345120	+	3R:28486953-28519398	+	Yes	-3.218	2.548
FBgn0013949	Ela	3R:20691072-20693373	+	3R:24865350-24867651	+	Yes	2.643	2.492
FBgn0013953	Esp	3R:20667657-20676134	+	3R:24841935-24850412	+	Yes	3.766	1.821
FBgn0013954	FK506-bp2	2R:15177614-15178467	+	2R:19290109-19290962	+	Yes	8.8	7.318
FBgn0013972	Gycalpha99B	3R:25508225-25511480	+	3R:29682503-29685758	+	Yes	1.793	3.426
FBgn0013973	Gycbeta100B	3R:26960114-27004000	+	3R:31134392-31178278	+	Yes	1.302	2.912
FBgn0013981	His4r	3R:10451477-10452336	+	3R:14625755-14626614	+	Yes	8.173	7.75
FBgn0013983	imd	2R:14297301-14301104	-	2R:18409796-18413599	-	Yes	4.812	3.987
FBgn0013984	InR	3R:17395970-17445043	-	3R:21570248-21619321	-	Yes	3.542	3.428
FBgn0013987	MAPk-Ak2	X:5653941-5658236	-	X:5759908-5764203	-	Yes	6.057	5.165
FBgn0013995	Calx	3R:16803905-16841335	+	3R:20978183-21015613	+	Yes	4.442	4.614
FBgn0013997	Nrx-IV	3L:12139619-12150090	+	3L:12146519-12156990	+	Yes	4.12	4.432
FBgn0014000	Hf	2L:19966727-19967685	-	2L:19966727-19967685	-	Yes	5.227	5.604
FBgn0014001	Pak	3R:2176618-2187336	+	3R:6350896-6361614	+	Yes	4.478	3.844
FBgn0014002	Pdi	3L:15130838-15135940	-	3L:15137738-15142840	-	Yes	8.072	8.065
FBgn0014006	Pk92B	3R:15705441-15711752	+	3R:19879719-19886030	+	Yes	4.836	4.131
FBgn0014007	Ptp69D	3L:12728045-12734668	+	3L:12734945-12741568	+	Yes	5.279	3.673
FBgn0014009	Rab2	2R:2584244-2586974	+	2R:6696739-6699469	+	Yes	5.971	6.029
FBgn0014010	Rab5	2L:2359142-2365273	-	2L:2359142-2365273	-	Yes	5.933	5.797
FBgn0014011	Rac2	3L:7426749-7428290	-	3L:7433649-7435190	-	Yes	5.217	4.972
FBgn0014018	Rel	3R:4869905-4873699	-	3R:9044183-9047977	-	Yes	5.615	5.572
FBgn0014019	Rh5	2L:12008153-12009832	+	2L:12008153-12009832	+	Yes	3.315	4.529
FBgn0014020	Rho1	2R:11990192-11994734	+	2R:16102687-16107229	+	Yes	7.191	7.118
FBgn0014022	Rlb1	3R:5339049-5340549	+	3R:9513327-9514827	+	Yes	4.45	2.463
FBgn0014023	mRpL47	3R:5340544-5341630	-	3R:9514822-9515908	-	Yes	5.743	4.397
FBgn0014024	Rnp4F	X:5212961-5216729	-	X:5318928-5322696	-	Yes	4.458	3.006
FBgn0014026	RpL7A	X:6424930-6427381	-	X:6530897-6533348	-	Yes	10.126	8.799
FBgn0014028	SdhB	2R:2695131-2696677	+	2R:6807626-6809172	+	Yes	6.124	7.114
FBgn0014029	2019-09-02	3R:16411851-16414078	-	3R:20586129-20588356	-	Yes	5.78	4.307
FBgn0014031	Spat	X:6422981-6424759	+	X:6528948-6530726	+	Yes	5.537	5.585
FBgn0014032	Sptr	X:8357329-8358471	-	X:8463296-8464438	-	Yes	5.116	3.36
FBgn0014033	Sr-CI	2L:4121702-4124153	+	2L:4121702-4124153	+	Yes	2.092	2.473
FBgn0014037	Su(Tpl)	3L:19882220-19902510	-	3L:19889120-19909410	-	Yes	4.327	4.238
FBgn0014073	Tie	3L:4510698-4532145	-	3L:4510698-4532145	-	Yes	1.707	2.745
FBgn0014075	Ugt	3L:18865847-18871345	+	3L:18872747-18878245	+	Yes	5.479	4.945
FBgn0014076	Vm32E	2L:11171167-11171665	-	2L:11171167-11171665	-	Yes	6.334	-4.278
FBgn0014092	CG4278	2L:16327069-16328131	+	2L:16327069-16328131	+	Yes	4.826	3.252
FBgn0014127	barr	2L:20058163-20061370	-	2L:20058163-20061370	-	Yes	4.917	3.521
FBgn0014133	bif	X:11573003-11588773	+	X:11678970-11694740	+	Yes	5.558	3.33
FBgn0014135	bnl	3R:15619795-15662539	-	3R:19794073-19836817	-	Yes	1.203	2.236
FBgn0014141	cher	3R:12917255-12951111	-	3R:17091533-17125389	-	Yes	5.354	4.95
FBgn0014143	croc	3L:21467233-21469579	-	3L:21474133-21476479	-	Yes	-1.725	0.154
FBgn0014163	fax	3L:16395896-16404928	-	3L:16402796-16411828	-	Yes	5.525	5.075
FBgn0014179	gcm	2L:9579498-9581745	-	2L:9579498-9581745	-	Yes	-3.427	-0.484
FBgn0014184	Oda	2R:8053800-8061769	-	2R:12166295-12174264	-	Yes	9.042	9.421
FBgn0014189	Hel25E	2L:5539326-5542314	-	2L:5539326-5542314	-	Yes	7.191	4.392
FBgn0014269	prod	2R:14856909-14858638	-	2R:18969404-18971133	-	Yes	5.239	3.482
FBgn0014340	mof	X:5767873-5770886	-	X:5873840-5876853	-	Yes	4.229	2.57
FBgn0014342	mia	3R:1373837-1376890	-	3R:5548115-5551168	-	Yes	0.835	2.761
FBgn0014343	mirr	3L:12686739-12703349	+	3L:12693639-12710249	+	Yes	0.038	0.528
FBgn0014366	noi	3R:1415323-1417181	-	3R:5589601-5591459	-	Yes	5.126	3.716
FBgn0014368	nol	3L:11123935-11124502	+	3L:11130835-11131402	+	Yes	-2.037	-1.282
FBgn0014380	RhoL	3R:5322823-5328303	-	3R:9497101-9502581	-	Yes	4.544	5.057
FBgn0014388	sty	3L:3401153-3424935	-	3L:3401153-3424935	-	Yes	3.387	3.954
FBgn0014391	sun	X:15741892-15743291	-	X:15847859-15849258	-	Yes	8.925	8.93
FBgn0014395	tilB	X:21851573-21853299	+	X:22449737-22451463	+	Yes	0.978	3.415
FBgn0014396	tim	2L:3493986-3508119	-	2L:3493986-3508119	-	Yes	4.238	5.295
FBgn0014411	Vps26	X:1767886-1770507	+	X:1873853-1876474	+	Yes	5.374	4.523
FBgn0014417	CG13397	2L:8408888-8411868	-	2L:8408888-8411868	-	Yes	4.938	2.87
FBgn0014427	CG11899	3R:25026176-25027492	+	3R:29200454-29201770	+	Yes	6.366	5.234
FBgn0014454	Acp1	2L:7740562-7741537	-	2L:7740562-7741537	-	Yes	-0.339	1.498
FBgn0014455	Ahcy13	X:15344294-15347200	+	X:15450261-15453167	+	Yes	6.049	3.804
FBgn0014464	Cp7Fa	X:8364921-8367120	+	X:8470888-8473087	+	Yes	6.345	-1.629
FBgn0014465	Cp7Fb	X:8367870-8370104	+	X:8473837-8476071	+	Yes	5.817	-3.07
FBgn0014466	Cp7Fc	X:8371150-8372353	+	X:8477117-8478320	+	Yes	5.069	-6.692
FBgn0014469	Cyp4e2	2R:4332065-4334669	+	2R:8444560-8447164	+	Yes	5.992	6.646
FBgn0014848	Eig71Eh	3L:15652036-15652541	-	3L:15658936-15659441	-	No	-9.184	-8.934
FBgn0014849	Eig71Ei	3L:15652807-15653451	+	3L:15659707-15660351	+	No	-9.131	-8.32
FBgn0014850	Eig71Ej	3L:15653649-15654115	-	3L:15660549-15661015	-	No	-9.109	-7.311
FBgn0014851	Eig71Ek	3L:15654348-15654909	+	3L:15661248-15661809	+	No	-8.792	-8.257
FBgn0014857	His3.3A	2L:5055058-5056149	+	2L:5055058-5056149	+	Yes	6.676	6.27
FBgn0014859	Hr38	2L:20683462-20714588	-	2L:20683462-20714588	-	Yes	-0.754	0.686
FBgn0014861	Mcm2	3R:4090692-4093646	+	3R:8264970-8267924	+	Yes	5.639	0.729
FBgn0014863	Mlp84B	3R:2939244-2943454	-	3R:7113522-7117732	-	Yes	7.083	8.047
FBgn0014865	Mtk	2R:11296351-11296618	+	2R:15408846-15409113	+	Yes	6.415	6.183
FBgn0014868	Ost48	X:9050962-9052548	-	X:9156929-9158515	-	Yes	5.905	5.192
FBgn0014869	Pglym78	3R:24973970-24975623	+	3R:29148248-29149901	+	Yes	7.796	7.656
FBgn0014870	Psi	2R:12748826-12755219	-	2R:16861321-16867714	-	Yes	3.559	3.155
FBgn0014877	Roe1	2R:9441582-9443111	+	2R:13554077-13555606	+	Yes	6.152	5.769
FBgn0014879	Set	3R:11089274-11090975	+	3R:15263552-15265253	+	Yes	7.127	4.513
FBgn0014903	CG14630	X:925538-927198	+	X:1031505-1033165	+	Yes	4.614	4.605
FBgn0014906	Hydr2	2L:3163645-3169462	+	2L:3163645-3169462	+	Yes	5.202	5.039
FBgn0014930	CG2846	3R:3737739-3739012	-	3R:7912017-7913290	-	Yes	4.836	4.712
FBgn0014931	CG2678	3R:3739573-3742272	+	3R:7913851-7916550	+	Yes	4.396	0.56
FBgn0014949	btn	3R:18411871-18412347	-	3R:22586149-22586625	-	No	-7.232	-6.331
FBgn0015000	betaggt-I	2L:4945579-4948324	+	2L:4945579-4948324	+	Yes	5.414	4.646
FBgn0015001	iotaTry	2R:7244225-7245042	+	2R:11356720-11357537	+	Yes	4.169	4.283
FBgn0015008	Actn3	3R:12801607-12803517	-	3R:16975885-16977795	-	Yes	-6.567	4.829
FBgn0015010	Ag5r	X:14678697-14680584	-	X:14784664-14786551	-	Yes	6.151	6.458
FBgn0015011	Ahcy89E	3R:12804161-12807880	-	3R:16978439-16982158	-	Yes	3.004	4.004
FBgn0015019	Cctgamma	3R:12473327-12475700	+	3R:16647605-16649978	+	Yes	7.265	4.646
FBgn0015024	CkIalpha	X:12547659-12551867	+	X:12653626-12657834	+	Yes	6.568	5.939
FBgn0015025	CkIIalpha-i1	3L:15810079-15811721	+	3L:15816979-15818621	+	Yes	3.266	1.997
FBgn0015031	cype	2L:5327227-5327969	+	2L:5327227-5327969	+	Yes	7.881	8.326
FBgn0015032	Cyp4c3	3R:26719760-26726410	+	3R:30894038-30900688	+	Yes	-0.131	0.456
FBgn0015033	Cyp4d8	3L:7486657-7489279	-	3L:7493557-7496179	-	Yes	3.055	3.808
FBgn0015034	Cyp4e1	2R:4334956-4337250	+	2R:8447451-8449745	+	Yes	2.356	4.239
FBgn0015035	Cyp4e3	2L:9747839-9750071	-	2L:9747839-9750071	-	Yes	2.8	3.438
FBgn0015036	Cyp4ae1	X:2073040-2075031	+	X:2179007-2180998	+	Yes	3.152	2.693
FBgn0015037	Cyp4p1	2R:5127546-5129644	+	2R:9240041-9242139	+	Yes	4.468	5.5
FBgn0015038	Cyp9b1	2R:3015343-3017313	-	2R:7127838-7129808	-	Yes	1.428	2.068
FBgn0015039	Cyp9b2	2R:3017782-3019644	-	2R:7130277-7132139	-	Yes	5.722	6.153
FBgn0015040	Cyp9c1	2R:20518586-20520446	+	2R:24631063-24632923	+	Yes	3.201	3.892
FBgn0015075	Ddx1	3L:22256469-22259117	+	3L:22263369-22266017	+	Yes	4.406	3.739
FBgn0015218	eIF-4E	3L:9392718-9395560	-	3L:9399618-9402460	-	Yes	7.57	6.236
FBgn0015221	Fer2LCH	3R:26213526-26216306	+	3R:30387804-30390584	+	Yes	7.824	7.971
FBgn0015222	Fer1HCH	3R:26211295-26213900	-	3R:30385573-30388178	-	Yes	8.021	8.092
FBgn0015229	glec	3R:17676416-17681988	-	3R:21850694-21856266	-	Yes	4.446	3.108
FBgn0015230	Glut3	3R:12614033-12615743	+	3R:16788311-16790021	+	Yes	-7.919	4.056
FBgn0015239	Hr78	3L:21487119-21490594	-	3L:21494019-21497494	-	Yes	5.531	4.692
FBgn0015240	Hr96	3R:20850957-20855073	+	3R:25025235-25029351	+	Yes	4.362	3.348
FBgn0015245	Hsp60	X:11002515-11006341	+	X:11108482-11112308	+	Yes	8.133	6.487
FBgn0015247	Iap2	2R:11819675-11822330	-	2R:15932170-15934825	-	Yes	5.682	5.785
FBgn0015268	Nap1	2R:19792698-19794817	-	2R:23905175-23907294	-	Yes	9.441	7.144
FBgn0015269	Nf1	3R:21808735-21821459	+	3R:25983013-25995737	+	Yes	3.406	3.782
FBgn0015270	Orc2	3R:9790607-9792797	+	3R:13964885-13967075	+	Yes	4.52	-0.719
FBgn0015271	Orc5	2L:13829837-13831576	+	2L:13829837-13831576	+	Yes	4.681	0.984
FBgn0015277	Pi3K59F	2R:19448015-19451568	+	2R:23560492-23564045	+	Yes	3.755	3.407
FBgn0015278	Pi3K68D	3L:11767750-11783113	-	3L:11774650-11790013	-	Yes	4.453	4.281
FBgn0015279	Pi3K92E	3R:16454694-16460454	-	3R:20628972-20634732	-	Yes	4.294	3.493
FBgn0015282	Rpt2	3R:19755595-19757280	-	3R:23929873-23931558	-	Yes	6.842	6.09
FBgn0015283	Rpn10	3L:21530100-21531682	+	3L:21537000-21538582	+	Yes	6.984	6.4
FBgn0015286	Rala	X:3598643-3613668	-	X:3704610-3719635	-	Yes	6.24	5.191
FBgn0015288	RpL22	X:656593-659163	-	X:762560-765130	-	Yes	9.548	8.436
FBgn0015295	shark	2R:12086931-12090389	-	2R:16199426-16202884	-	Yes	4.63	2.485
FBgn0015296	Shc	3L:9420110-9421771	+	3L:9427010-9428671	+	Yes	4.519	3.558
FBgn0015298	Srp19	3L:7340410-7341134	-	3L:7347310-7348034	-	Yes	5.404	4.582
FBgn0015299	Ssb-c31a	2L:8211347-8211938	+	2L:8211347-8211938	+	Yes	6.744	5.106
FBgn0015300	Ssl	2R:20386766-20387790	-	2R:24499243-24500267	-	Yes	-7.821	3.717
FBgn0015316	Try29F	2L:8998537-8999816	+	2L:8998537-8999816	+	Yes	1.176	1.448
FBgn0015320	UbcD2	2L:10765010-10768006	-	2L:10765010-10768006	-	Yes	5.733	5.347
FBgn0015321	UbcD4	3L:9691436-9693581	+	3L:9698336-9700481	+	Yes	6.761	5.919
FBgn0015323	VAChT	3R:14531223-14544638	+	3R:18705501-18718916	+	Yes	1.441	3.057
FBgn0015324	Vha26	3R:1417485-1421078	+	3R:5591763-5595356	+	Yes	8.368	8.291
FBgn0015331	abs	3R:58769-60763	+	3R:4233047-4235041	+	Yes	2.933	2.762
FBgn0015336	CG15865	X:16554931-16558488	-	X:16660898-16664455	-	Yes	1.182	1.791
FBgn0015338	CG5861	2L:16305801-16307298	-	2L:16305801-16307298	-	Yes	5.677	4.504
FBgn0015351	CG14906	3R:12475703-12476879	-	3R:16649981-16651157	-	Yes	3.581	2.319
FBgn0015359	CG2034	3L:2257456-2258922	+	3L:2257456-2258922	+	Yes	4.891	4.451
FBgn0015360	oxt	3L:2258839-2262664	-	3L:2258839-2262664	-	Yes	4.758	3.219
FBgn0015371	chn	2R:11002741-11032288	+	2R:15115236-15144783	+	Yes	4.669	2.937
FBgn0015372	RabX1	2R:19407362-19411136	-	2R:23519839-23523613	-	Yes	3.715	3.16
FBgn0015374	crl	X:16487710-16489900	+	X:16593677-16595867	+	Yes	5.428	5.415
FBgn0015376	cutlet	2L:3707230-3711748	-	2L:3707230-3711748	-	Yes	3.729	0.08
FBgn0015379	dod	X:21216385-21217885	+	X:21345358-21346858	+	Yes	5.016	3.73
FBgn0015380	drl	2L:19190342-19208621	+	2L:19190342-19208621	+	Yes	1.092	1.984
FBgn0015381	dsf	2L:5925937-5939261	+	2L:5925937-5939261	+	No	-7.329	-3.879
FBgn0015391	glu	2L:16733617-16738388	-	2L:16733617-16738388	-	Yes	5.399	2.039
FBgn0015393	hoip	2L:9699791-9700459	+	2L:9699791-9700459	+	Yes	8.66	4.11
FBgn0015396	jumu	3R:6175904-6187334	+	3R:10350182-10361612	+	Yes	5.766	1.72
FBgn0015399	kek1	2L:12817000-12822787	-	2L:12817000-12822787	-	Yes	2.052	2.198
FBgn0015400	kek2	2L:11581937-11626883	+	2L:11581937-11626883	+	Yes	-0.026	1.558
FBgn0015402	ksr	3R:1304112-1309628	-	3R:5478390-5483906	-	Yes	3.296	2.56
FBgn0015477	Rme-8	2R:5055268-5064766	-	2R:9167763-9177261	-	Yes	5.095	4.112
FBgn0015509	Cul1	2R:3804361-3809084	+	2R:7916856-7921579	+	Yes	6.842	5.575
FBgn0015513	mbc	3R:19607487-19627356	+	3R:23781765-23801634	+	Yes	5.088	4.523
FBgn0015519	nAChRalpha3	X:8170233-8261202	-	X:8276200-8367169	-	Yes	-1.049	0.234
FBgn0015520	nonA-l	3R:12465927-12468834	+	3R:16640205-16643112	+	Yes	4.546	3.642
FBgn0015521	RpS21	2L:2856070-2857029	+	2L:2856070-2857029	+	Yes	9.449	8.037
FBgn0015522	olf186-M	2R:13734204-13735949	+	2R:17846699-17848444	+	Yes	6.17	4.14
FBgn0015524	otp	2R:16771130-16790919	-	2R:20883625-20903414	-	Yes	-0.564	0.738
FBgn0015527	pen	X:21217530-21220870	-	X:21346503-21349843	-	Yes	6.432	3.45
FBgn0015541	sda	3R:22741483-22771031	+	3R:26915761-26945309	+	Yes	3.717	4.747
FBgn0015543	snoRNA:Me28S-A1322	2R:7780628-7780700	+	2R:11893123-11893195	+	Yes	5.947	5.796
FBgn0015544	spag	2R:20046907-20049026	+	2R:24159384-24161503	+	Yes	4.384	3.456
FBgn0015546	spel1	2L:14362069-14366840	+	2L:14362069-14366840	+	Yes	4.583	2.506
FBgn0015550	tap	3L:17352782-17354911	+	3L:17359682-17361811	+	No	-2.079	-2.26
FBgn0015553	tos	2L:18679631-18682075	-	2L:18679631-18682075	-	Yes	5.451	-0.757
FBgn0015558	tty	X:21199640-21210703	-	X:21328613-21339676	-	Yes	0.778	1.678
FBgn0015561	unpg	2R:5082710-5087375	+	2R:9195205-9199870	+	Yes	-0.743	0.372
FBgn0015568	alpha-Est1	3R:3371455-3374846	-	3R:7545733-7549124	-	Yes	5.414	5.055
FBgn0015569	alpha-Est10	3R:3312305-3319567	-	3R:7486583-7493845	-	Yes	3.55	4.517
FBgn0015570	alpha-Est2	3R:3367532-3370952	+	3R:7541810-7545230	+	Yes	3.962	3.531
FBgn0015571	alpha-Est3	3R:3364694-3367353	-	3R:7538972-7541631	-	Yes	4.496	6.185
FBgn0015572	alpha-Est4	3R:3362409-3364337	-	3R:7536687-7538615	-	Yes	1.227	1.657
FBgn0015574	alpha-Est6	3R:3350289-3354499	-	3R:7524567-7528777	-	Yes	-1.891	3.801
FBgn0015575	alpha-Est7	3R:3345285-3349475	-	3R:7519563-7523753	-	Yes	5.852	6.805
FBgn0015576	alpha-Est8	3R:3335065-3341392	-	3R:7509343-7515670	-	Yes	4.026	5.122
FBgn0015577	alpha-Est9	3R:3319643-3330820	-	3R:7493921-7505098	-	Yes	4.343	5.028
FBgn0015582	dare	2R:7178499-7180679	-	2R:11290994-11293174	-	Yes	4.464	3.154
FBgn0015583	Acp29AB	2L:8392456-8393222	-	2L:8392456-8393222	-	No	-7.735	6.05
FBgn0015584	Acp53Ea	2R:12637308-12637840	-	2R:16749803-16750335	-	Yes	-2.862	10.106
FBgn0015585	Acp63F	3L:3815839-3816354	-	3L:3815839-3816354	-	Yes	-3.559	8.921
FBgn0015586	Acp76A	3L:19043857-19045126	-	3L:19050757-19052026	-	Yes	-4.787	8.123
FBgn0015589	Apc	3R:24658023-24670470	-	3R:28832301-28844748	-	Yes	4.032	3.654
FBgn0015591	AstA	3R:20586252-20590793	-	3R:24760530-24765071	-	Yes	1.718	2.87
FBgn0015600	toc	2L:3068345-3144786	-	2L:3068345-3144786	-	Yes	3.847	4.912
FBgn0015602	BEAF-32	2R:10657974-10660135	+	2R:14770469-14772630	+	Yes	5.503	3.249
FBgn0015609	CadN	2L:17647053-17778340	-	2L:17647053-17778340	-	Yes	1.776	2.8
FBgn0015614	CanB2	2R:3673515-3676558	+	2R:7786010-7789053	+	Yes	6.304	5.674
FBgn0015615	Cap	X:16483029-16487472	-	X:16588996-16593439	-	Yes	5.221	3.142
FBgn0015618	Cdk8	3L:9830180-9831770	-	3L:9837080-9838670	-	Yes	3.67	1.374
FBgn0015621	Clp	2L:819964-821209	+	2L:819964-821209	+	Yes	4.501	2.02
FBgn0015622	Cnx99A	3R:25140976-25145366	-	3R:29315254-29319644	-	Yes	6.32	6.479
FBgn0015623	Cpr	2L:6338836-6346280	+	2L:6338836-6346280	+	Yes	7.329	8.352
FBgn0015625	CycB3	3R:20693656-20696538	-	3R:24867934-24870816	-	Yes	5.131	2.364
FBgn0015663	Dot	2L:3619097-3621573	+	2L:3619097-3621573	+	Yes	2.329	2.59
FBgn0015664	Dref	2L:9964147-9967229	-	2L:9964147-9967229	-	Yes	5.348	3.266
FBgn0015714	Cyp6a17	2R:10761458-10763244	+	2R:14873953-14875739	+	Yes	4.405	5.081
FBgn0015721	ktub	2R:16989433-17011209	+	2R:21101928-21123704	+	Yes	-0.551	1.854
FBgn0015737	Hmu	3R:23114491-23117314	+	3R:27288769-27291592	+	Yes	4.832	4.716
FBgn0015754	Lis-1	2R:12066331-12072608	+	2R:16178826-16185103	+	Yes	6.228	5.661
FBgn0015756	RpL9	2L:11002758-11004189	-	2L:11002758-11004189	-	Yes	10.485	9.072
FBgn0015765	p38a	3R:19976138-19978043	-	3R:24150416-24152321	-	Yes	4.276	3.805
FBgn0015766	Msr-110	3L:5560019-5570448	-	3L:5566919-5577348	-	Yes	6.989	8.22
FBgn0015770	MstProx	3R:3191661-3195027	-	3R:7365939-7369305	-	No	-8.383	-2.115
FBgn0015772	Nak	2L:18957732-18968744	-	2L:18957732-18968744	-	Yes	4.047	3.646
FBgn0015773	NetA	X:14498045-14547961	-	X:14604012-14653928	-	Yes	1.632	2.6
FBgn0015774	NetB	X:14580071-14643409	-	X:14686038-14749376	-	Yes	1.186	2.371
FBgn0015776	nrv1	2L:6778555-6786861	-	2L:6778555-6786861	-	Yes	7.37	7.541
FBgn0015777	nrv2	2L:6789770-6798862	-	2L:6789770-6798862	-	Yes	4.874	6.72
FBgn0015778	rin	3R:9472726-9480249	+	3R:13647004-13654527	+	Yes	6.088	5.267
FBgn0015781	P5cr	3R:14854653-14855881	+	3R:19028931-19030159	+	Yes	4.661	4.151
FBgn0015789	Rab10	X:20122412-20125717	+	X:20251338-20254691	+	Yes	6.835	5.761
FBgn0015790	Rab11	3R:16937130-16941868	+	3R:21111408-21116146	+	Yes	7.231	6.447
FBgn0015791	Rab14	2L:14355145-14358764	+	2L:14355145-14358764	+	Yes	4.586	5.409
FBgn0015793	Rab19	3L:8290118-8291606	+	3L:8297018-8298506	+	Yes	4.347	4.44
FBgn0015794	Rab18	X:5564860-5565845	-	X:5670827-5671812	-	Yes	5.911	5.508
FBgn0015795	Rab7	3R:19818730-19821174	+	3R:23993008-23995452	+	Yes	6.693	6.738
FBgn0015797	Rab6	2L:12107221-12109116	-	2L:12107221-12109116	-	Yes	5.638	4.81
FBgn0015799	Rbf	X:691123-695512	-	X:797090-801479	-	Yes	5.419	3.261
FBgn0015801	Reg-5	2R:20675531-20680933	-	2R:24788008-24793410	-	Yes	3.827	3.994
FBgn0015803	RtGEF	2L:20350434-20365254	+	2L:20350434-20365254	+	Yes	3.3	2.885
FBgn0015805	Rpd3	3L:4626734-4629467	+	3L:4626734-4629467	+	Yes	6.26	3.721
FBgn0015806	S6k	3L:5790649-5804031	-	3L:5797549-5810931	-	Yes	4.881	4.345
FBgn0015808	ScpX	2L:18831229-18833630	+	2L:18831229-18833630	+	Yes	5.741	5.728
FBgn0015818	Spx	X:6149855-6151629	+	X:6255822-6257596	+	Yes	3.091	0.97
FBgn0015828	TfIIEalpha	3L:11675138-11676905	+	3L:11682038-11683805	+	Yes	5.908	3.86
FBgn0015829	TfIIEbeta	3L:4287038-4288349	+	3L:4287038-4288349	+	Yes	4.383	4.168
FBgn0015831	Rtnl2	3R:3354586-3355963	-	3R:7528864-7530241	-	Yes	-3.528	5.354
FBgn0015834	Trip1	2L:4966367-4967775	-	2L:4966367-4967775	-	Yes	8.085	6.952
FBgn0015838	Vang	2R:4990743-4994301	+	2R:9103238-9106796	+	Yes	4.205	2.453
FBgn0015872	Drip	2R:7298708-7317150	-	2R:11411203-11429645	-	Yes	4.026	5.19
FBgn0015903	apt	2R:19452414-19487049	+	2R:23564891-23599526	+	Yes	4.899	2.575
FBgn0015904	ara	3L:12573772-12589118	+	3L:12580672-12596018	+	Yes	0.172	1.326
FBgn0015905	ast	2L:1077948-1080803	+	2L:1077948-1080803	+	Yes	4.306	2.872
FBgn0015907	bl	2R:16475056-16494359	+	2R:20587551-20606854	+	Yes	5.577	5.017
FBgn0015919	caup	3L:12602731-12614898	+	3L:12609631-12621798	+	Yes	-0.531	0.83
FBgn0015924	crq	2L:448254-453024	-	2L:448254-453024	-	Yes	6.336	5.47
FBgn0015925	csul	2R:12152157-12154464	+	2R:16264652-16266959	+	Yes	4.863	2.574
FBgn0015926	dah	X:15222375-15225035	+	X:15328342-15331002	+	Yes	5.653	-1.667
FBgn0015929	dpa	2R:3384207-3387650	-	2R:7496702-7500145	-	Yes	6.019	2.118
FBgn0015946	grim	3L:18295819-18297517	-	3L:18302719-18304417	-	No	-2.781	-1.476
FBgn0015949	hrg	2R:15551424-15557337	-	2R:19663919-19669832	-	Yes	4.294	3.836
FBgn0016013	Faa	3L:4072032-4073954	-	3L:4072032-4073954	-	Yes	2.514	3.865
FBgn0016031	lama	3L:5336719-5349023	-	3L:5343619-5355923	-	Yes	4.592	4.516
FBgn0016032	lbm	2R:2936743-2939469	+	2R:7049238-7051964	+	Yes	2.667	3.703
FBgn0016034	mael	3L:22717333-22719334	+	3L:22724233-22726234	+	Yes	5.056	2.99
FBgn0016036	mei-P22	3L:7237488-7238483	+	3L:7244388-7245383	+	Yes	0.759	-0.252
FBgn0016038	mod(r)	X:515563-517084	+	X:621530-623051	+	Yes	5.292	5.184
FBgn0016041	Tom40	X:7630926-7634011	+	X:7736893-7739978	+	Yes	6.365	4.62
FBgn0016047	nompA	2R:7197840-7206181	-	2R:11310335-11318676	-	Yes	-1.695	-0.388
FBgn0016053	pgc	2R:18217705-18220318	+	2R:22330200-22332813	+	Yes	7.501	-1.939
FBgn0016054	phr6-4	2L:20643351-20645791	-	2L:20643351-20645791	-	Yes	5.123	1.078
FBgn0016059	Sema-1b	2R:13560344-13571004	-	2R:17672839-17683499	-	Yes	5.773	5.081
FBgn0016061	side	3R:23200810-23263204	-	3R:27375088-27437482	-	Yes	-0.375	1.259
FBgn0016070	smg	3L:8983417-8991089	-	3L:8990317-8997989	-	Yes	7.478	3.45
FBgn0016075	vkg	2L:5012144-5028191	-	2L:5012144-5028191	-	Yes	5.28	4.937
FBgn0016076	vri	2L:5288944-5311223	+	2L:5288944-5311223	+	Yes	3.884	4.955
FBgn0016078	wun	2R:5288036-5300968	-	2R:9400531-9413463	-	Yes	4.667	4.46
FBgn0016080	xmas-1	X:17045264-17048625	-	X:17151231-17154592	-	Yes	0.611	4.812
FBgn0016081	fry	3L:9624934-9672203	-	3L:9631834-9679103	-	Yes	3.334	4.202
FBgn0016119	ATPsyn-Cf6	3R:19180942-19181786	-	3R:23355220-23356064	-	Yes	7.869	8.141
FBgn0016120	ATPsyn-d	3R:14920722-14921993	+	3R:19095000-19096271	+	Yes	8.036	8.292
FBgn0016122	Acer	2L:8521933-8525740	+	2L:8521933-8525740	+	Yes	5.703	5.986
FBgn0016123	Aph-4	3R:26874651-26878262	+	3R:31048929-31052540	+	Yes	5.904	6.712
FBgn0016126	CaMKI	4:466130-474573	+	4:445504-453947	+	Yes	6.667	6.934
FBgn0016131	Cdk4	2R:12466975-12472953	+	2R:16579470-16585448	+	Yes	4.71	2.231
FBgn0016641	PTP-ER	2R:17506826-17511951	-	2R:21619321-21624446	-	Yes	3.354	2.731
FBgn0016650	Lgr1	3R:13551499-13558929	+	3R:17725777-17733207	+	Yes	1.133	2.305
FBgn0016660	H15	2L:5404280-5416593	+	2L:5404280-5416593	+	Yes	-1.103	-0.392
FBgn0016672	Ipp	3R:9784511-9786196	+	3R:13958789-13960474	+	Yes	5.452	5.196
FBgn0016675	Lectin-galC1	2L:19417447-19418274	+	2L:19417447-19418274	+	Yes	4.353	5.353
FBgn0016684	NaPi-T	2R:10730225-10733379	-	2R:14842720-14845874	-	Yes	3.985	4.816
FBgn0016685	Nlp	3R:25830507-25836074	+	3R:30004785-30010352	+	Yes	8.443	5.525
FBgn0016687	Nurf-38	2R:20446490-20448610	-	2R:24558967-24561087	-	Yes	7.858	7.204
FBgn0016691	Oscp	3R:11091313-11092412	+	3R:15265591-15266690	+	Yes	8.753	9.13
FBgn0016693	Past1	3R:8523044-8530597	+	3R:12697322-12704875	+	Yes	4.27	4.732
FBgn0016694	Pdp1	3L:7804558-7860469	-	3L:7811458-7867369	-	Yes	3.611	4.523
FBgn0016696	Pitslre	3L:20764628-20770031	+	3L:20771528-20776931	+	Yes	5.706	4.979
FBgn0016697	Prosalpha5	2R:13300272-13301274	+	2R:17412767-17413769	+	Yes	7.286	6.582
FBgn0016698	Ptpa	2L:3377002-3378590	+	2L:3377002-3378590	+	Yes	4.481	3.765
FBgn0016700	Rab1	3R:17091751-17094782	-	3R:21266029-21269060	-	Yes	7.268	7.21
FBgn0016701	Rab4	2R:13460967-13462484	+	2R:17573462-17574979	+	Yes	6.019	5.515
FBgn0016715	Reg-2	3L:605165-606569	-	3L:605165-606569	-	Yes	4.546	5.216
FBgn0016726	RpL29	2R:17181273-17181909	+	2R:21293768-21294404	+	Yes	11.109	9.761
FBgn0016754	sba	3R:19719896-19748695	-	3R:23894174-23922973	-	Yes	2.714	2.893
FBgn0016756	Ubp64E	3L:5746073-5754986	+	3L:5752973-5761886	+	Yes	5.643	6.26
FBgn0016762	angel	2R:19581526-19582755	+	2R:23694003-23695232	+	Yes	3.378	2.585
FBgn0016792	dmt	3R:5536864-5540397	+	3R:9711142-9714675	+	Yes	5.416	2.845
FBgn0016794	dos	3L:2589414-2595590	+	3L:2589414-2595590	+	Yes	4.77	2.765
FBgn0016797	fz2	3L:19134075-19228473	-	3L:19140975-19235373	-	Yes	3.101	3.686
FBgn0016917	Stat92E	3R:16361045-16378033	-	3R:20535323-20552311	-	Yes	6.552	6.166
FBgn0016919	nompB	2L:21578292-21589423	-	2L:21578292-21589423	-	Yes	-1.597	3.063
FBgn0016920	nompC	2L:5346237-5365760	+	2L:5346237-5365760	+	Yes	-1.538	-0.214
FBgn0016926	Pino	2L:1114654-1128953	-	2L:1114654-1128953	-	Yes	6.304	6.548
FBgn0016930	Dyrk2	2L:14184478-14234126	-	2L:14184478-14234126	-	Yes	3.97	4.119
FBgn0016970	l(2)k10201	2R:5286585-5287404	+	2R:9399080-9399899	+	Yes	4.776	3.262
FBgn0016974	swaPsi	X:6255529-6257343	-	X:6361496-6363310	-	Yes	1.166	4.23
FBgn0016975	stnB	X:22382558-22406484	-	X:22980722-23004648	-	No	-9.966	-9.966
FBgn0016976	stnA	X:22382558-22406484	-	X:22980722-23004648	-	No	-9.966	-9.966
FBgn0016977	spen	2L:159032-203397	+	2L:159032-203397	+	Yes	3.983	4.44
FBgn0016978	snRNP-U1-70K	2L:6968711-6971737	-	2L:6968711-6971737	-	Yes	4.915	3.569
FBgn0016983	smid	3L:7374714-7378737	+	3L:7381614-7385637	+	Yes	6.237	3.918
FBgn0016984	sktl	2R:16714787-16723533	-	2R:20827282-20836028	-	Yes	5.135	4.081
FBgn0017414	cag	2R:6780539-6781919	-	2R:10893034-10894414	-	Yes	3.907	2.825
FBgn0017418	ari-1	X:18024425-18031817	-	X:18130392-18137784	-	Yes	3.887	4.018
FBgn0017429	CG5989	3L:8595511-8597249	-	3L:8602411-8604149	-	Yes	4.535	3.816
FBgn0017430	Nelf-E	3L:8592542-8593979	-	3L:8599442-8600879	-	Yes	4.48	3.821
FBgn0017448	CG2187	3R:27581078-27584359	-	3R:31755356-31758637	-	Yes	3.781	3.631
FBgn0017456	Ubc84D	3R:3344542-3345178	-	3R:7518820-7519456	-	Yes	-0.472	6.305
FBgn0017457	U2af38	2L:292959-294681	-	2L:292959-294681	-	Yes	5.679	4.075
FBgn0017482	T3dh	2R:18217231-18219577	-	2R:22329726-22332072	-	Yes	2.875	3.1
FBgn0017545	RpS3A	4:85851-87833	-	4:65225-67207	-	Yes	11.081	9.593
FBgn0017550	Rga	3R:1432997-1438834	-	3R:5607275-5613112	-	Yes	5.174	3.817
FBgn0017551	Rca1	2L:6852315-6853866	+	2L:6852315-6853866	+	Yes	5.4	3.034
FBgn0017556	Prosalpha4T2	2R:20388303-20389800	-	2R:24500780-24502277	-	Yes	-7.204	4.903
FBgn0017558	Pdk	2R:5313944-5322143	+	2R:9426439-9434638	+	Yes	4.677	5.024
FBgn0017561	Ork1	X:10772087-10785283	-	X:10878054-10891250	-	Yes	4.904	2.719
FBgn0017566	ND75	X:8142684-8145720	-	X:8248651-8251687	-	Yes	6.656	7.278
FBgn0017567	ND23	3R:11661770-11662839	-	3R:15836048-15837117	-	Yes	7.189	7.751
FBgn0017572	Mo25	3L:16606318-16608572	-	3L:16613218-16615472	-	Yes	4.994	4.647
FBgn0017577	Mcm5	3R:6614246-6616872	+	3R:10788524-10791150	+	Yes	6.586	0.453
FBgn0017578	Max	3L:19255332-19257284	-	3L:19262232-19264184	-	Yes	5.003	4.51
FBgn0017579	RpL14	3L:8594106-8595492	+	3L:8601006-8602392	+	Yes	10.902	9.565
FBgn0017581	Lk6	3R:7576653-7590179	-	3R:11750931-11764457	-	Yes	7.486	7.967
FBgn0017590	klg	3R:18725006-18787453	+	3R:22899284-22961731	+	Yes	0.865	2.476
FBgn0019624	CoVa	3R:7645081-7646021	+	3R:11819359-11820299	+	Yes	8.656	9.041
FBgn0019637	Atu	3R:1439080-1441661	+	3R:5613358-5615939	+	Yes	4.932	2.958
FBgn0019643	Dat	2R:20027086-20045285	+	2R:24139563-24157762	+	Yes	5.15	6.035
FBgn0019644	ATPsyn-b	3L:9723099-9724324	+	3L:9729999-9731224	+	Yes	8.858	9.297
FBgn0019650	toy	4:1010351-1028548	+	4:989725-1007922	+	Yes	1.398	2.918
FBgn0019660	roX2	X:11473098-11474465	+	X:11579065-11580432	+	Yes	0.158	7.545
FBgn0019661	roX1	X:3751263-3756730	-	X:3857230-3862697	-	Yes	1.315	8.351
FBgn0019662	qm	3L:7341413-7346722	+	3L:7348313-7353622	+	Yes	4.16	3.756
FBgn0019686	lok	2L:20061422-20064381	+	2L:20061422-20064381	+	Yes	7.485	2.077
FBgn0019809	gcm2	2L:9608562-9612706	+	2L:9608562-9612706	+	No	-6.689	-3.434
FBgn0019828	dj	3R:2885037-2886246	+	3R:7059315-7060524	+	Yes	-4.581	8.465
FBgn0019830	colt	2L:2768590-2770069	-	2L:2768590-2770069	-	Yes	6.064	6.278
FBgn0019886	Letm1	2R:20397031-20402843	-	2R:24509508-24515320	-	Yes	5.146	5.544
FBgn0019890	Smg5	2L:13898828-13904661	-	2L:13898828-13904661	-	Yes	4.757	5.18
FBgn0019925	Surf4	3R:11169375-11171898	-	3R:15343653-15346176	-	Yes	6.51	5.937
FBgn0019928	Ser8	2R:9321712-9322550	+	2R:13434207-13435045	+	Yes	4.162	5.193
FBgn0019929	Ser7	X:9759266-9761103	+	X:9865233-9867070	+	Yes	3.878	4.86
FBgn0019932	SamDC	2L:10339457-10341503	+	2L:10339457-10341503	+	Yes	5.28	5.318
FBgn0019936	RpS20	3R:16647903-16649078	+	3R:20822181-20823356	+	Yes	10.852	9.437
FBgn0019938	RpI1	2R:10483116-10488721	-	2R:14595611-14601216	-	Yes	5.688	2.87
FBgn0019940	Rh6	3R:11308880-11310421	+	3R:15483158-15484699	+	Yes	3.483	5.143
FBgn0019947	Psn	3L:20425568-20428256	+	3L:20432468-20435156	+	Yes	4.872	4.163
FBgn0019948	Phm	2R:19872698-19875978	-	2R:23985175-23988455	-	Yes	5.118	6.112
FBgn0019949	Cdk9	2R:18523568-18525232	-	2R:22636063-22637727	-	Yes	4.534	3.502
FBgn0019952	Orct	3R:20101982-20104514	+	3R:24276260-24278792	+	Yes	2.736	3.883
FBgn0019957	ND42	3R:17853431-17855115	+	3R:22027709-22029393	+	Yes	6.814	7.28
FBgn0019960	CG6455	3R:17845227-17849057	-	3R:22019505-22023335	-	Yes	6.411	6.975
FBgn0019968	Khc-73	2R:11403283-11419764	-	2R:15515778-15532259	-	Yes	4.417	4.593
FBgn0019972	Ice	3R:25625380-25627306	+	3R:29799658-29801584	+	Yes	5.206	3.361
FBgn0019982	Gs1l	2L:4455137-4456807	-	2L:4455137-4456807	-	Yes	5.723	5.521
FBgn0019985	mGluR	4:957445-970067	+	4:936819-949441	+	Yes	1.449	2.257
FBgn0019990	Gcn2	3R:27221382-27227735	+	3R:31395660-31402013	+	Yes	4.206	3.353
FBgn0020018	Ppox	3R:20485919-20487573	-	3R:24660197-24661851	-	Yes	4.464	4.85
FBgn0020224	Cbl	3L:8418054-8425346	+	3L:8424954-8432246	+	Yes	4.655	2.956
FBgn0020235	ATPsyn-gamma	3R:25573426-25574885	-	3R:29747704-29749163	-	Yes	7.659	7.894
FBgn0020236	ATPCL	2R:11881036-11888795	-	2R:15993531-16001290	-	Yes	6.724	7.257
FBgn0020238	14-3-3epsilon	3R:14068253-14076272	+	3R:18242531-18250550	+	Yes	7.856	6.847
FBgn0020248	stet	3L:1475438-1489547	-	3L:1475438-1489547	-	Yes	5.871	-0.479
FBgn0020249	stck	3R:4182700-4185686	+	3R:8356978-8359964	+	Yes	5.74	5.251
FBgn0020251	sfl	3L:6488780-6543204	+	3L:6495680-6550104	+	Yes	4.028	3.925
FBgn0020255	Ran	X:11038885-11042749	-	X:11144852-11148716	-	Yes	8.324	6.364
FBgn0020257	ppa	2R:18572460-18576492	-	2R:22684955-22688987	-	Yes	2.543	3.356
FBgn0020258	ppk	2L:14378218-14381172	-	2L:14378218-14381172	-	Yes	-1.404	-0.139
FBgn0020261	pcm	X:19379792-19386044	-	X:19485759-19492011	-	Yes	3.849	2.963
FBgn0020269	mspo	2R:10558901-10601127	-	2R:14671396-14713622	-	Yes	1.285	2.683
FBgn0020270	mre11	2L:11282090-11284335	+	2L:11282090-11284335	+	Yes	4.665	2.599
FBgn0020272	mst	X:21260004-21262560	+	X:21388977-21391533	+	Yes	3.93	1.011
FBgn0020277	lush	3L:19597498-19599190	-	3L:19604398-19606090	-	Yes	1.127	2.81
FBgn0020278	loco	3R:18445690-18465109	-	3R:22619968-22639387	-	Yes	3.136	2.597
FBgn0020279	lig	2R:3955482-3966320	+	2R:8067977-8078815	+	Yes	5.766	4.87
FBgn0020280	laf	3R:701727-704255	-	3R:4876005-4878533	-	Yes	-6.634	3.362
FBgn0020294	ko	3L:21068681-21124259	-	3L:21075581-21131159	-	Yes	1.486	2.656
FBgn0020299	stumps	3R:10402939-10433801	+	3R:14577217-14608079	+	Yes	2.001	3.195
FBgn0020300	gk	3L:18132502-18138518	+	3L:18139402-18145418	+	Yes	2.818	5.013
FBgn0020304	drongo	2L:833584-851071	-	2L:833584-851071	-	Yes	4.764	4.823
FBgn0020305	dbe	2L:868673-869857	-	2L:868673-869857	-	Yes	5.407	3.217
FBgn0020306	dom	2R:17210935-17229352	+	2R:21323430-21341847	+	Yes	6.012	4.285
FBgn0020307	dve	2R:18131468-18173974	+	2R:22243963-22286469	+	Yes	1.186	2.013
FBgn0020309	crol	2L:11794327-11809438	-	2L:11794327-11809438	-	Yes	4.625	4.389
FBgn0020312	CG4050	2R:17011240-17016015	-	2R:21123735-21128510	-	Yes	4.355	2.611
FBgn0020369	Rpt6	X:21187079-21188690	+	X:21316052-21317663	+	Yes	6.196	5.234
FBgn0020370	TppII	2R:9040390-9046646	-	2R:13152885-13159141	-	Yes	6.179	4.752
FBgn0020371	Tim17b2	2L:15484729-15485545	+	2L:15484729-15485545	+	Yes	-7.236	6.144
FBgn0020372	TM4SF	2R:19765720-19768383	+	2R:23878197-23880860	+	Yes	2.574	4.131
FBgn0020376	Sr-CIII	2L:4120343-4121627	+	2L:4120343-4121627	+	No	-5.498	-4.694
FBgn0020377	Sr-CII	2R:8096398-8099660	-	2R:12208893-12212155	-	Yes	-2.009	-0.178
FBgn0020378	Sp1	X:9623681-9650402	+	X:9729648-9756369	+	Yes	-0.208	0.767
FBgn0020379	Rfx	3R:6187482-6203790	-	3R:10361760-10378068	-	Yes	1.751	1.503
FBgn0020381	Dredd	X:527655-529578	-	X:633622-635545	-	Yes	4.261	4.023
FBgn0020385	pug	3R:6522256-6529038	+	3R:10696534-10703316	+	Yes	5.831	6.063
FBgn0020386	Pdk1	3L:129450-145895	+	3L:129450-145895	+	Yes	5.829	5.742
FBgn0020388	Gcn5	3L:12514229-12517114	-	3L:12521129-12524014	-	Yes	4.711	3.785
FBgn0020389	Papss	3L:19838393-19854025	+	3L:19845293-19860925	+	Yes	4.2	2.461
FBgn0020391	Nrk	2R:9047568-9050989	+	2R:13160063-13163484	+	Yes	0.186	0.676
FBgn0020392	Nmt	3L:8169235-8171529	-	3L:8176135-8178429	-	Yes	6.446	4.017
FBgn0020399	Mst89B	3R:12092734-12094155	+	3R:16267012-16268433	+	Yes	-4.795	5.067
FBgn0020407	asun	3R:12089993-12092613	+	3R:16264271-16266891	+	Yes	3.45	1.767
FBgn0020412	JIL-1	3L:11071852-11086293	-	3L:11078752-11093193	-	Yes	4.136	3.983
FBgn0020414	Idgf3	2L:16450907-16455194	+	2L:16450907-16455194	+	Yes	3.4	4.619
FBgn0020415	Idgf2	2L:16447330-16450508	+	2L:16447330-16450508	+	Yes	6.047	6.358
FBgn0020416	Idgf1	2L:16445278-16446793	+	2L:16445278-16446793	+	Yes	5.034	5.012
FBgn0020429	GluRIIB	2L:5559342-5563502	+	2L:5559342-5563502	+	No	-3.19	-2.265
FBgn0020440	Fak	2R:15318164-15324764	-	2R:19430659-19437259	-	Yes	4.463	3.629
FBgn0020443	Elf	2L:12434452-12441279	+	2L:12434452-12441279	+	Yes	6.562	5.162
FBgn0020445	E23	2L:3334875-3354829	-	2L:3334875-3354829	-	Yes	4.049	1.278
FBgn0020493	Dad	3R:12879729-12896130	+	3R:17054007-17070408	+	Yes	2.658	3.217
FBgn0020496	CtBP	3R:8837371-8851997	+	3R:13011649-13026275	+	Yes	5.926	4.799
FBgn0020497	emb	2L:8403573-8408853	+	2L:8403573-8408853	+	Yes	6.238	4.721
FBgn0020503	CLIP-190	2L:17384700-17409698	+	2L:17384700-17409698	+	Yes	5.14	6.257
FBgn0020506	Amyrel	2R:12538600-12540204	-	2R:16651095-16652699	-	Yes	-0.662	-0.28
FBgn0020508	Ag5r2	X:14676995-14678085	-	X:14782962-14784052	-	Yes	6.171	5.249
FBgn0020509	Acp62F	3L:2739750-2740228	+	3L:2739750-2740228	+	Yes	-4.394	8.894
FBgn0020510	Abi	3R:9944984-9948142	-	3R:14119262-14122420	-	Yes	4.736	3.886
FBgn0020513	ade5	X:12651069-12654650	-	X:12757036-12760617	-	Yes	7.195	6.877
FBgn0020518	snoRNA:Me28S-G764	3L:22862645-22862722	-	3L:22869545-22869622	-	Yes	0.286	1.11
FBgn0020521	pio	2R:20468768-20485385	+	2R:24581245-24597862	+	Yes	3.568	4.614
FBgn0020545	kraken	2L:852768-854539	+	2L:852768-854539	+	Yes	5.831	6.016
FBgn0020546	iab-4	3R:12675726-12682219	+	3R:16850004-16856497	+	No	-3.751	-3.781
FBgn0020556	bxd	3R:12567847-12598911	-	3R:16742125-16773189	-	No	-5.4	-4.989
FBgn0020616	SA	2L:6950421-6954586	+	2L:6950421-6954586	+	Yes	4.923	3.356
FBgn0020617	Rx	2R:16804258-16824535	+	2R:20916753-20937030	+	No	-3.01	-1.195
FBgn0020618	Rack1	2L:7825347-7827315	-	2L:7825347-7827315	-	Yes	9.531	8.135
FBgn0020620	RN-tre	2R:9872320-9878212	-	2R:13984815-13990707	-	Yes	3.363	2.855
FBgn0020621	Pkn	2R:5139815-5172602	-	2R:9252310-9285097	-	Yes	4.819	4.611
FBgn0020622	Pi3K21B	2L:297880-305233	+	2L:297880-305233	+	Yes	5.626	3.932
FBgn0020626	Osbp	3R:20760591-20763944	-	3R:24934869-24938222	-	Yes	5.344	5.287
FBgn0020633	Mcm7	3L:8884696-8887410	+	3L:8891596-8894310	+	Yes	6.167	0.118
FBgn0020637	Lcp65Ag2	3L:6126090-6126693	-	3L:6132990-6133593	-	Yes	1.616	-2.395
FBgn0020638	Lcp65Ag1	3L:6127797-6128374	-	3L:6134697-6135274	-	No	0.024	-8.753
FBgn0020639	Lcp65Af	3L:6129315-6129891	-	3L:6136215-6136791	-	No	-3.475	-7.223
FBgn0020640	Lcp65Ae	3L:6130683-6131218	-	3L:6137583-6138118	-	No	-9.075	-8.484
FBgn0020641	Lcp65Ad	3L:6136495-6137201	+	3L:6143395-6144101	+	No	-8.582	-4.938
FBgn0020642	Lcp65Ac	3L:6137919-6138493	+	3L:6144819-6145393	+	No	-0.85	-4.688
FBgn0020643	Lcp65Ab2	3L:6139774-6140189	+	3L:6146674-6147089	+	No	-9.966	-9.966
FBgn0020644	Lcp65Ab1	3L:6142648-6143060	+	3L:6149548-6149960	+	No	-9.924	-9.948
FBgn0020645	Lcp65Aa	3L:6144404-6144903	+	3L:6151304-6151803	+	No	-6.362	-9.191
FBgn0020646	Lcp65APsi	3L:6141453-6141715	+	3L:6148353-6148615	+	No	-9.758	-9.718
FBgn0020647	KrT95D	3R:19823260-19857549	-	3R:23997538-24031827	-	Yes	4.454	5.18
FBgn0020653	Trxr-1	X:8136561-8142066	+	X:8242528-8248033	+	Yes	7.081	6.477
FBgn0020655	ArfGAP1	3L:12408126-12410680	-	3L:12415026-12417580	-	Yes	5.785	4.531
FBgn0020660	eIF-4B	2RHet:2901758-2917360	+	3L:27842669-27858271	-	Yes	7.685	7.26
FBgn0020762	Atet	2L:4333913-4345776	+	2L:4333913-4345776	+	Yes	3.628	3.817
FBgn0020764	Alas	2R:19852295-19854280	+	2R:23964772-23966757	+	Yes	5.515	6.641
FBgn0020765	Acp65Aa	3L:6145150-6145845	-	3L:6152050-6152745	-	Yes	1.767	0.559
FBgn0020766	Aats-phe	2R:9855813-9857407	+	2R:13968308-13969902	+	Yes	4.667	4.888
FBgn0020767	Spred	2R:10647151-10656928	-	2R:14759646-14769423	-	Yes	4.472	4.373
FBgn0020880	CG7179	2L:7775804-7778029	-	2L:7775804-7778029	-	No	-2.355	-2.372
FBgn0020887	Su(z)12	3L:19911342-19916562	-	3L:19918242-19923462	-	Yes	3.279	1.864
FBgn0020906	Jon25Bi	2L:4954279-4955144	-	2L:4954279-4955144	-	Yes	7.584	6.877
FBgn0020907	Scp2	3R:12400265-12409385	-	3R:16574543-16583663	-	Yes	4.972	6.111
FBgn0020908	Scp1	2RHet:1707564-1743021	-	2R:2932595-2968052	-	Yes	9.178	10.426
FBgn0020909	Rtc1	X:13651212-13652631	+	X:13757179-13758598	+	Yes	5.399	2.539
FBgn0020910	RpL3	3R:7047616-7050895	+	3R:11221894-11225173	+	Yes	9.67	8.422
FBgn0020912	Ptx1	3R:26738476-26756404	+	3R:30912754-30930682	+	Yes	0.934	1.776
FBgn0020930	Dgkepsilon	2R:8645051-8647229	+	2R:12757546-12759724	+	Yes	4.3	4.521
FBgn0021738	Crg-1	X:3687256-3691372	+	X:3793223-3797339	+	No	-4.784	-2.578
FBgn0021742	C901	X:10858065-10861167	-	X:10964032-10967134	-	No	-5.474	-4.951
FBgn0021750	Aats-ser	3R:11166389-11168940	+	3R:15340667-15343218	+	Yes	3.811	2.456
FBgn0021760	chb	3L:21165953-21176378	+	3L:21172853-21183278	+	Yes	5.075	6.184
FBgn0021761	Nup154	2L:11004820-11010921	+	2L:11004820-11010921	+	Yes	5.136	2.302
FBgn0021764	sdk	X:580867-643529	+	X:686834-749496	+	Yes	4.199	2.82
FBgn0021765	scu	X:17985292-17986886	+	X:18091259-18092853	+	Yes	6.84	5.79
FBgn0021767	org-1	X:8341724-8349102	-	X:8447691-8455069	-	Yes	0.013	1.222
FBgn0021768	nudC	3L:16798094-16812632	+	3L:16804994-16819532	+	Yes	6.017	5.202
FBgn0021776	mira	3R:15757521-15760842	-	3R:19931799-19935120	-	Yes	0.755	0.557
FBgn0021795	Tapdelta	2R:7257805-7258840	-	2R:11370300-11371335	-	Yes	6.192	5.532
FBgn0021796	Tor	2L:13004480-13013197	+	2L:13004480-13013197	+	Yes	3.88	3.227
FBgn0021800	Reph	2L:3803545-3810671	+	2L:3803545-3810671	+	Yes	4.603	3.649
FBgn0021814	Vps28	2R:3966374-3967546	-	2R:8078869-8080041	-	Yes	4.915	5.777
FBgn0021818	cnk	2R:13301475-13307512	-	2R:17413970-17420007	-	Yes	4.021	2.912
FBgn0021825	Dmn	2R:4779337-4780844	+	2R:8891832-8893339	+	Yes	5.599	5.001
FBgn0021847	l(2)k14710	2R:2097287-2101627	-	2R:6209782-6214122	-	Yes	4.874	4.27
FBgn0021856	l(2)k14505	2L:21261168-21262411	+	2L:21261168-21262411	+	Yes	5.034	4.241
FBgn0021872	Xbp1	2R:17031050-17033255	+	2R:21143545-21145750	+	Yes	7.216	7.423
FBgn0021874	Nle	2L:566366-568121	-	2L:566366-568121	-	Yes	4.778	2.825
FBgn0021875	Zfrp8	2R:20021512-20022928	+	2R:24133989-24135405	+	Yes	4.157	2.598
FBgn0021895	ytr	2R:19734684-19739003	-	2R:23847161-23851480	-	Yes	3.346	2.718
FBgn0021906	RFeSP	2L:1612429-1614160	-	2L:1612429-1614160	-	Yes	8.086	8.71
FBgn0021944	Coprox	2L:6964421-6965887	+	2L:6964421-6965887	+	Yes	4.189	3.437
FBgn0021953	Fatp	2L:10510672-10517218	-	2L:10510672-10517218	-	No	-9.966	-9.966
FBgn0021967	Pdsw	2L:3466157-3467334	+	2L:3466157-3467334	+	Yes	7.409	7.674
FBgn0021979	l(2)k09913	2R:18954719-18959398	+	2R:23067196-23071875	+	Yes	5.517	5.245
FBgn0021995	Rs1	2R:4051069-4055274	+	2R:8163564-8167769	+	Yes	5.586	3.203
FBgn0022023	eIF-3p40	2L:5051193-5053094	-	2L:5051193-5053094	-	Yes	7.701	6.899
[truncated: 15,098 more rows]

## Sheet: Table S2B
NTR ID	Transcribed Region (Release 5)	Strand (Release 5)	Transcribed Region (Release 6)	Strand (Release 6)	Isoforms	Type	Mean Log2 FPKM (Females)	Mean Log2 FPKM (Males)
XLOC_000005	2L:101621-101873	+	2L:101621-101873	+	1	Intronic	1.32	1.735
XLOC_000007	2L:112022-112686	+	2L:112022-112686	+	1	Intronic	2.609	2.565
XLOC_000011	2L:187301-187426	+	2L:187301-187426	+	1	Intronic	0.474	1.785
XLOC_000025	2L:338356-338853	+	2L:338356-338853	+	1	Intronic	0.814	1.712
XLOC_000038	2L:494042-494517	+	2L:494042-494517	+	1	Intronic	0.024	-0.981
XLOC_000089	2L:930429-936615	+	2L:930429-936615	+	1	Intronic	-2.484	-0.719
XLOC_000115	2L:1135087-1138618	+	2L:1135087-1138618	+	1	Intronic	-0.222	1.264
XLOC_000122	2L:1174583-1174909	+	2L:1174583-1174909	+	1	Intronic	2.764	3.665
XLOC_000124	2L:1192663-1193148	+	2L:1192663-1193148	+	1	Intronic	-1.513	-0.355
XLOC_000125	2L:1193399-1196200	+	2L:1193399-1196200	+	1	Intronic	-1.053	-0.052
XLOC_000152	2L:1359956-1361282	+	2L:1359956-1361282	+	1	Anti-Sense	-6.969	0.609
XLOC_000198	2L:1687458-1688081	+	2L:1687458-1688081	+	1	Intronic	-4.16	1.28
XLOC_000203	2L:1742298-1743341	+	2L:1742298-1743341	+	1	Intronic	1.535	2.617
XLOC_000204	2L:1743801-1744922	+	2L:1743801-1744922	+	1	Intronic	1.419	2.48
XLOC_000205	2L:1746034-1747679	+	2L:1746034-1747679	+	1	Intronic	1.155	2.243
XLOC_000206	2L:1747944-1748661	+	2L:1747944-1748661	+	1	Intronic	0.407	1.541
XLOC_000207	2L:1749123-1749254	+	2L:1749123-1749254	+	1	Intronic	0.786	2.312
XLOC_000248	2L:1900793-1905389	+	2L:1900793-1905389	+	1	Intronic	-0.835	-0.174
XLOC_000249	2L:1906056-1907155	+	2L:1906056-1907155	+	1	Intronic	-1.003	-0.336
XLOC_000250	2L:1907262-1907493	+	2L:1907262-1907493	+	1	Intronic	-2.051	-0.949
XLOC_000251	2L:1908289-1908514	+	2L:1908289-1908514	+	1	Intronic	-3.049	-1.14
XLOC_000252	2L:1909082-1909555	+	2L:1909082-1909555	+	1	Intronic	-2.212	-1.077
XLOC_000253	2L:1937599-1937798	+	2L:1937599-1937798	+	1	Intronic	1.313	2.182
XLOC_000254	2L:1938190-1938338	+	2L:1938190-1938338	+	1	Intronic	0.769	1.953
XLOC_000270	2L:2011825-2014211	+	2L:2011825-2014211	+	1	Anti-Sense	-1.386	-0.684
XLOC_000271	2L:2014282-2015911	+	2L:2014282-2015911	+	1	Intronic	-1.908	-0.956
XLOC_000272	2L:2016213-2017358	+	2L:2016213-2017358	+	1	Intronic	-1.83	-0.753
XLOC_000305	2L:2222853-2223144	+	2L:2222853-2223144	+	1	Intronic	-0.782	0.457
XLOC_000381	2L:2752843-2753209	+	2L:2752843-2753209	+	1	Anti-Sense	3.216	3.512
XLOC_000393	2L:2857588-2859620	+	2L:2857588-2859620	+	1	Intronic	0.3	1.216
XLOC_000394	2L:2865585-2866292	+	2L:2865585-2866292	+	1	Intronic	0.018	1.05
XLOC_000395	2L:2873158-2873490	+	2L:2873158-2873490	+	1	Intronic	-3.985	-1.178
XLOC_000398	2L:2886642-2887360	+	2L:2886642-2887360	+	1	Intronic	0.09	0.879
XLOC_000399	2L:2893129-2895120	+	2L:2893129-2895120	+	1	Intronic	-1.121	-0.308
XLOC_000400	2L:2897681-2898959	+	2L:2897681-2898959	+	1	Intronic	-1.219	-0.365
XLOC_000401	2L:2899441-2899744	+	2L:2899441-2899744	+	1	Intronic	-2.187	-0.821
XLOC_000402	2L:2935379-2936316	+	2L:2935379-2936316	+	1	Intronic	-1.341	-0.432
XLOC_000403	2L:2936378-2941595	+	2L:2936378-2941595	+	1	Intronic	-1.254	-0.202
XLOC_000404	2L:2942100-2943817	+	2L:2942100-2943817	+	1	Intronic	-1.696	-0.858
XLOC_000496	2L:3646282-3647594	+	2L:3646282-3647594	+	1	Intronic	-0.837	-2.102
XLOC_000510	2L:3772788-3773293	+	2L:3772788-3773293	+	1	Intronic	-0.807	-0.029
XLOC_000511	2L:3773630-3775935	+	2L:3773630-3775935	+	1	Intronic	-1.033	-0.388
XLOC_000512	2L:3777131-3777564	+	2L:3777131-3777564	+	1	Intronic	-2.224	-0.952
XLOC_000559	2L:4031799-4032261	+	2L:4031799-4032261	+	1	Intronic	0.718	0.884
XLOC_000560	2L:4033253-4034522	+	2L:4033253-4034522	+	1	Intronic	0.19	0.385
XLOC_000561	2L:4034870-4035933	+	2L:4034870-4035933	+	1	Intronic	0.052	0.167
XLOC_000562	2L:4037460-4037733	+	2L:4037460-4037733	+	1	Intronic	-0.07	0
XLOC_000563	2L:4038956-4039389	+	2L:4038956-4039389	+	1	Intronic	-0.961	-0.292
XLOC_000564	2L:4048324-4048683	+	2L:4048324-4048683	+	1	Intronic	-0.497	-0.326
XLOC_000565	2L:4048828-4049231	+	2L:4048828-4049231	+	1	Intronic	-0.367	-0.091
XLOC_000566	2L:4049345-4051688	+	2L:4049345-4051688	+	1	Intronic	-0.062	0.231
XLOC_000567	2L:4052364-4052978	+	2L:4052364-4052978	+	1	Intronic	-0.548	-0.272
XLOC_000568	2L:4054697-4055671	+	2L:4054697-4055671	+	1	Intronic	-1.544	-0.978
XLOC_000569	2L:4056259-4060972	+	2L:4056259-4060972	+	1	Intronic	0.166	0.435
XLOC_000570	2L:4061917-4063031	+	2L:4061917-4063031	+	1	Intronic	-0.159	0.162
XLOC_000571	2L:4063106-4064301	+	2L:4063106-4064301	+	1	Intronic	-0.186	0.119
XLOC_000572	2L:4064537-4064846	+	2L:4064537-4064846	+	1	Intronic	-0.709	-0.241
XLOC_000574	2L:4075888-4077112	+	2L:4075888-4077112	+	1	Anti-Sense	-1.155	-0.922
XLOC_000575	2L:4077291-4077586	+	2L:4077291-4077586	+	1	Intronic	-1.835	-1.543
XLOC_000576	2L:4080086-4080936	+	2L:4080086-4080936	+	1	Intronic	0.416	0.562
XLOC_000577	2L:4081035-4082476	+	2L:4081035-4082476	+	1	Intronic	0.243	0.469
XLOC_000578	2L:4082555-4083586	+	2L:4082555-4083586	+	1	Intronic	0.165	0.427
XLOC_000579	2L:4083666-4084330	+	2L:4083666-4084330	+	1	Intronic	-0.015	0.207
XLOC_000580	2L:4084654-4085179	+	2L:4084654-4085179	+	1	Intronic	0.205	0.46
XLOC_000582	2L:4088865-4089173	+	2L:4088865-4089173	+	1	Intronic	0.05	0.361
XLOC_000583	2L:4101320-4101942	+	2L:4101320-4101942	+	1	Intronic	-0.909	-0.616
XLOC_000584	2L:4102444-4102797	+	2L:4102444-4102797	+	1	Intronic	-2.039	-1.517
XLOC_000585	2L:4105590-4105870	+	2L:4105590-4105870	+	1	Intronic	-2.053	-1.631
XLOC_000586	2L:4107876-4108818	+	2L:4107876-4108818	+	1	Intronic	-0.292	0.161
XLOC_000587	2L:4108972-4109846	+	2L:4108972-4109846	+	1	Intronic	-0.49	-0.031
XLOC_000588	2L:4110641-4112222	+	2L:4110641-4112222	+	1	Intronic	-0.311	0.094
XLOC_000589	2L:4112397-4112858	+	2L:4112397-4112858	+	1	Intronic	-0.79	-0.28
XLOC_000619	2L:4289764-4290232	+	2L:4289764-4290232	+	1	Intronic	-2.717	-0.767
XLOC_000627	2L:4334462-4336447	+	2L:4334462-4336447	+	1	Intronic	0.651	0.601
XLOC_000635	2L:4396186-4396798	+	2L:4396186-4396798	+	1	Intronic	0.243	-0.223
XLOC_000704	2L:4988929-4989388	+	2L:4988929-4989388	+	1	Intronic	0.28	0.544
XLOC_000705	2L:4989662-4990298	+	2L:4989662-4990298	+	1	Intronic	-1.009	0.199
XLOC_000706	2L:5006683-5008180	+	2L:5006683-5008180	+	1	Intronic	-0.431	-2.893
XLOC_000712	2L:5043389-5044295	+	2L:5043389-5044295	+	1	Anti-Sense	0.741	1.634
XLOC_000713	2L:5045487-5045819	+	2L:5045487-5045819	+	1	Intronic	1.421	2.039
XLOC_000716	2L:5061359-5062702	+	2L:5061359-5062702	+	1	Anti-Sense	-1.216	-1.023
XLOC_000717	2L:5063215-5064200	+	2L:5063215-5064200	+	1	Anti-Sense	-0.462	0.345
XLOC_000720	2L:5101185-5101921	+	2L:5101185-5101921	+	1	Intronic	-0.32	0.879
XLOC_000721	2L:5111273-5111632	+	2L:5111273-5111632	+	1	Intronic	-0.507	0.704
XLOC_000722	2L:5112354-5112679	+	2L:5112354-5112679	+	1	Intronic	-0.572	0.679
XLOC_000723	2L:5113039-5113315	+	2L:5113039-5113315	+	1	Intronic	-0.482	0.885
XLOC_000724	2L:5113677-5116195	+	2L:5113677-5116195	+	1	Intronic	-0.993	-0.09
XLOC_000727	2L:5120769-5120930	+	2L:5120769-5120930	+	1	Intronic	-2.696	-0.246
XLOC_000728	2L:5146817-5146986	+	2L:5146817-5146986	+	1	Intronic	1.149	3.84
XLOC_000729	2L:5147373-5147660	+	2L:5147373-5147660	+	1	Intronic	-1.058	0.507
XLOC_000730	2L:5150397-5150875	+	2L:5150397-5150875	+	1	Intronic	0.58	1.52
XLOC_000731	2L:5152760-5152894	+	2L:5152760-5152894	+	1	Intronic	1.316	2.523
XLOC_000732	2L:5153935-5154076	+	2L:5153935-5154076	+	1	Intronic	1.731	3.114
XLOC_000739	2L:5306234-5306485	+	2L:5306234-5306485	+	1	Intronic	2.589	3.735
XLOC_000740	2L:5306857-5307367	+	2L:5306857-5307367	+	1	Intronic	2.112	3.202
XLOC_000804	2L:5742671-5744996	+	2L:5742671-5744996	+	1	Intronic	-0.578	-0.147
XLOC_000805	2L:5745057-5745683	+	2L:5745057-5745683	+	1	Intronic	-0.767	-0.192
XLOC_000828	2L:5944992-5945419	+	2L:5944992-5945419	+	1	Intronic	3.169	3.93
XLOC_000830	2L:5952628-5952979	+	2L:5952628-5952979	+	1	Intronic	1.266	1.384
XLOC_000831	2L:5953058-5953415	+	2L:5953058-5953415	+	1	Intronic	2.392	2.454
XLOC_000855	2L:6086155-6086466	+	2L:6086155-6086466	+	1	Intronic	1.186	1.973
XLOC_000856	2L:6086689-6088417	+	2L:6086689-6088417	+	1	Intronic	1.123	1.873
XLOC_000857	2L:6089663-6090148	+	2L:6089663-6090148	+	1	Intronic	1.037	1.795
XLOC_000859	2L:6102005-6105865	+	2L:6102005-6105865	+	1	Intronic	1.063	-0.6
XLOC_000860	2L:6106302-6106944	+	2L:6106302-6106944	+	1	Intronic	0.671	-1.251
XLOC_000861	2L:6110284-6111615	+	2L:6110284-6111615	+	1	Intronic	0.334	0.315
XLOC_000862	2L:6111978-6112246	+	2L:6111978-6112246	+	1	Intronic	0.317	-0.098
XLOC_000863	2L:6112485-6112702	+	2L:6112485-6112702	+	1	Intronic	0.432	0.337
XLOC_000864	2L:6117022-6117830	+	2L:6117022-6117830	+	1	Intronic	0.291	0.379
XLOC_000893	2L:6340221-6340717	+	2L:6340221-6340717	+	1	Intronic	1.152	1.954
XLOC_000926	2L:6613289-6613481	+	2L:6613289-6613481	+	1	Intronic	1.667	1.801
XLOC_000927	2L:6613620-6614037	+	2L:6613620-6614037	+	1	Intronic	1.766	1.871
XLOC_000928	2L:6614131-6615847	+	2L:6614131-6615847	+	1	Intronic	1.709	1.83
XLOC_000941	2L:6725280-6725657	+	2L:6725280-6725657	+	1	Intronic	-1.766	0.174
XLOC_000942	2L:6726721-6727065	+	2L:6726721-6727065	+	1	Intronic	0.549	0.851
XLOC_000945	2L:6746174-6746962	+	2L:6746174-6746962	+	1	Intronic	-1.906	-0.042
XLOC_000967	2L:6921931-6922583	+	2L:6921931-6922583	+	1	Intronic	3.017	3.002
XLOC_000984	2L:7039078-7039417	+	2L:7039078-7039417	+	1	Intronic	-0.999	-0.02
XLOC_000985	2L:7039590-7039877	+	2L:7039590-7039877	+	1	Intronic	-0.623	0.085
XLOC_000986	2L:7039995-7040384	+	2L:7039995-7040384	+	1	Intronic	-1.174	-0.193
XLOC_001002	2L:7184213-7184608	+	2L:7184213-7184608	+	1	Intronic	-0.176	1.125
XLOC_001061	2L:7678934-7680538	+	2L:7678934-7680538	+	1	Intronic	-0.554	-0.143
XLOC_001064	2L:7723240-7726540	+	2L:7723240-7726540	+	1	Anti-Sense	-1.362	-0.277
XLOC_001091	2L:8032753-8033372	+	2L:8032753-8033372	+	1	Intronic	-1.236	-0.288
XLOC_001098	2L:8167257-8168193	+	2L:8167257-8168193	+	1	Intronic	-1.356	-0.618
XLOC_001099	2L:8169137-8169892	+	2L:8169137-8169892	+	1	Intronic	-2.054	-0.983
XLOC_001101	2L:8184453-8184740	+	2L:8184453-8184740	+	1	Intronic	-3.604	-1.501
XLOC_001117	2L:8330789-8331497	+	2L:8330789-8331497	+	1	Intronic	0.113	0.991
XLOC_001130	2L:8421051-8421199	+	2L:8421051-8421199	+	1	Intronic	1.223	1.358
XLOC_001131	2L:8421306-8426455	+	2L:8421306-8426455	+	1	Intronic	0.263	0.278
XLOC_001157	2L:8589406-8594520	+	2L:8589406-8594520	+	1	Anti-Sense	-2.243	-0.873
XLOC_001178	2L:8698827-8703065	+	2L:8698827-8703065	+	1	Anti-Sense	-1.587	-1.487
XLOC_001261	2L:9132278-9134790	+	2L:9132278-9134790	+	1	Intronic	-1.339	-0.098
XLOC_001263	2L:9156599-9157560	+	2L:9156599-9157560	+	1	Intronic	-1.834	-0.34
XLOC_001264	2L:9157656-9161052	+	2L:9157656-9161052	+	1	Intronic	-1.868	-0.694
XLOC_001266	2L:9178099-9186365	+	2L:9178099-9186365	+	1	Intronic	0.704	1.363
XLOC_001267	2L:9186579-9187438	+	2L:9186579-9187438	+	1	Intronic	0.298	0.995
XLOC_001268	2L:9187786-9188857	+	2L:9187786-9188857	+	1	Intronic	0.088	0.727
XLOC_001269	2L:9189408-9190381	+	2L:9189408-9190381	+	1	Intronic	-0.173	0.515
XLOC_001270	2L:9190585-9190826	+	2L:9190585-9190826	+	1	Intronic	-0.166	0.925
XLOC_001271	2L:9194261-9195089	+	2L:9194261-9195089	+	1	Intronic	-0.141	0.592
XLOC_001272	2L:9195303-9195721	+	2L:9195303-9195721	+	1	Intronic	-0.483	0.468
XLOC_001273	2L:9196141-9197875	+	2L:9196141-9197875	+	1	Intronic	-0.276	0.457
XLOC_001274	2L:9198038-9199190	+	2L:9198038-9199190	+	1	Intronic	-0.318	0.406
XLOC_001275	2L:9200579-9201385	+	2L:9200579-9201385	+	1	Intronic	-0.579	0.249
XLOC_001276	2L:9201465-9202109	+	2L:9201465-9202109	+	1	Intronic	-0.873	0.089
XLOC_001277	2L:9202518-9207235	+	2L:9202518-9207235	+	1	Intronic	0.325	1.063
XLOC_001278	2L:9207339-9209951	+	2L:9207339-9209951	+	1	Intronic	0.072	0.755
XLOC_001279	2L:9210557-9212080	+	2L:9210557-9212080	+	1	Intronic	0.031	0.741
XLOC_001280	2L:9212431-9213272	+	2L:9212431-9213272	+	1	Intronic	-0.158	0.621
XLOC_001281	2L:9214499-9216468	+	2L:9214499-9216468	+	1	Intronic	0.316	1.063
XLOC_001282	2L:9216548-9217979	+	2L:9216548-9217979	+	1	Intronic	0.079	0.798
XLOC_001283	2L:9222802-9224812	+	2L:9222802-9224812	+	1	Intronic	0.015	0.928
XLOC_001284	2L:9225090-9225407	+	2L:9225090-9225407	+	1	Intronic	-0.118	0.777
XLOC_001285	2L:9232610-9233425	+	2L:9232610-9233425	+	1	Intronic	-0.379	0.384
XLOC_001286	2L:9233593-9233886	+	2L:9233593-9233886	+	1	Intronic	-2.474	-1.05
XLOC_001287	2L:9235441-9235635	+	2L:9235441-9235635	+	1	Intronic	-0.216	0.935
XLOC_001288	2L:9235762-9236467	+	2L:9235762-9236467	+	1	Intronic	-0.148	0.582
XLOC_001289	2L:9237031-9237683	+	2L:9237031-9237683	+	1	Intronic	-0.314	0.461
XLOC_001290	2L:9237819-9238414	+	2L:9237819-9238414	+	1	Intronic	-0.221	0.373
XLOC_001293	2L:9257639-9258270	+	2L:9257639-9258270	+	1	Intronic	-0.39	1.501
XLOC_001294	2L:9263038-9263569	+	2L:9263038-9263569	+	1	Intronic	-1.981	1.238
XLOC_001308	2L:9421109-9423237	+	2L:9421109-9423237	+	1	Intronic	-1.198	-0.537
XLOC_001310	2L:9453381-9453617	+	2L:9453381-9453617	+	1	Intronic	0.157	1.239
XLOC_001312	2L:9512413-9512840	+	2L:9512413-9512840	+	1	Intronic	0.006	0.36
XLOC_001313	2L:9513996-9514147	+	2L:9513996-9514147	+	1	Intronic	-0.917	-0.759
XLOC_001315	2L:9525341-9526513	+	2L:9525341-9526513	+	1	Intronic	-0.482	0.431
XLOC_001316	2L:9526575-9527134	+	2L:9526575-9527134	+	1	Intronic	-0.663	0.367
XLOC_001318	2L:9531021-9531437	+	2L:9531021-9531437	+	1	Intronic	-0.781	0.529
XLOC_001319	2L:9531909-9532405	+	2L:9531909-9532405	+	1	Intronic	-0.536	0.641
XLOC_001332	2L:9617841-9618306	+	2L:9617841-9618306	+	1	Intronic	-0.064	1.133
XLOC_001333	2L:9618550-9621052	+	2L:9618550-9621052	+	1	Intronic	-0.388	0.691
XLOC_001382	2L:10151813-10152695	+	2L:10151813-10152695	+	1	Intronic	-1.645	-0.705
XLOC_001401	2L:10364615-10364996	+	2L:10364615-10364996	+	1	Intronic	-0.976	0.502
XLOC_001406	2L:10398750-10399316	+	2L:10398750-10399316	+	1	Intronic	2.709	2.716
XLOC_001425	2L:10569106-10570145	+	2L:10569106-10570145	+	1	Intronic	-2.738	0.288
XLOC_001428	2L:10605376-10614702	+	2L:10605376-10614702	+	1	Intronic	-1.993	-1.159
XLOC_001497	2L:11109509-11110068	+	2L:11109509-11110068	+	1	Intronic	-0.011	0.472
XLOC_001568	2L:11591910-11594338	+	2L:11591910-11594338	+	1	Intronic	-1.884	-0.174
XLOC_001641	2L:12143069-12143336	+	2L:12143069-12143336	+	1	Intronic	-4.411	-0.954
XLOC_001647	2L:12224597-12225476	+	2L:12224597-12225476	+	1	Intronic	-0.51	0.929
XLOC_001648	2L:12226732-12235309	+	2L:12226732-12235309	+	1	Intronic	-0.443	0.856
XLOC_001649	2L:12235745-12238341	+	2L:12235745-12238341	+	1	Intronic	-0.764	0.5
XLOC_001650	2L:12238876-12240080	+	2L:12238876-12240080	+	1	Intronic	-0.835	0.426
XLOC_001651	2L:12242115-12246627	+	2L:12242115-12246627	+	1	Intronic	-1.153	0.136
XLOC_001652	2L:12247350-12252020	+	2L:12247350-12252020	+	1	Intronic	-2.193	-0.807
XLOC_001655	2L:12255335-12257763	+	2L:12255335-12257763	+	1	Intronic	-2.217	-0.725
XLOC_001656	2L:12257996-12259553	+	2L:12257996-12259553	+	1	Intronic	-2.509	-0.831
XLOC_001657	2L:12260313-12267665	+	2L:12260313-12267665	+	1	Intronic	-2.119	-0.838
XLOC_001659	2L:12299586-12300252	+	2L:12299586-12300252	+	1	Intronic	0.126	-0.106
XLOC_001660	2L:12301306-12301757	+	2L:12301306-12301757	+	1	Intronic	-0.201	-0.658
XLOC_001661	2L:12302792-12303329	+	2L:12302792-12303329	+	1	Intronic	-0.877	-1.426
XLOC_001663	2L:12308878-12309047	+	2L:12308878-12309047	+	1	Intronic	-1.253	-2.264
XLOC_001672	2L:12359688-12360987	+	2L:12359688-12360987	+	1	Intronic	-0.986	-0.174
XLOC_001673	2L:12361419-12362096	+	2L:12361419-12362096	+	1	Intronic	-1.465	-0.398
XLOC_001674	2L:12374251-12385382	+	2L:12374251-12385382	+	1	Intronic	-0.909	0.147
XLOC_001675	2L:12393920-12395899	+	2L:12393920-12395899	+	1	Intronic	-0.532	0.863
XLOC_001787	2L:13006010-13006226	+	2L:13006010-13006226	+	1	Intronic	-0.073	0.485
XLOC_001819	2L:13208811-13209435	+	2L:13208811-13209435	+	1	Intronic	2.408	3.404
XLOC_001820	2L:13210940-13211425	+	2L:13210940-13211425	+	1	Anti-Sense	-1.529	-0.243
XLOC_001831	2L:13296761-13297102	+	2L:13296761-13297102	+	1	Intronic	0.979	1.687
XLOC_001844	2L:13443368-13443639	+	2L:13443368-13443639	+	1	Intronic	-2.737	0.098
XLOC_001845	2L:13507545-13508615	+	2L:13507545-13508615	+	1	Intronic	-1.063	0.251
XLOC_001848	2L:13551764-13553285	+	2L:13551764-13553285	+	1	Intronic	-0.154	-0.066
XLOC_001849	2L:13553412-13553967	+	2L:13553412-13553967	+	1	Intronic	-0.258	-0.11
XLOC_001850	2L:13558929-13560313	+	2L:13558929-13560313	+	1	Intronic	-0.653	-0.467
XLOC_001851	2L:13565317-13566798	+	2L:13565317-13566798	+	1	Intronic	-0.649	-0.292
XLOC_001852	2L:13567400-13570984	+	2L:13567400-13570984	+	1	Intronic	-0.937	-0.516
XLOC_001853	2L:13578359-13578784	+	2L:13578359-13578784	+	1	Intronic	-0.989	-0.675
XLOC_001854	2L:13578977-13579215	+	2L:13578977-13579215	+	1	Intronic	-2.945	-1.931
XLOC_001855	2L:13579294-13580089	+	2L:13579294-13580089	+	1	Intronic	-1.452	-1.162
XLOC_001860	2L:13593797-13595198	+	2L:13593797-13595198	+	1	Intronic	-0.537	1.012
XLOC_001861	2L:13597252-13598971	+	2L:13597252-13598971	+	1	Intronic	-0.461	-0.173
XLOC_001862	2L:13600666-13606126	+	2L:13600666-13606126	+	1	Intronic	-0.865	-0.492
XLOC_001863	2L:13606836-13607515	+	2L:13606836-13607515	+	1	Intronic	-1.442	-0.751
XLOC_001864	2L:13610636-13615374	+	2L:13610636-13615374	+	1	Intronic	-1.114	-0.735
XLOC_001866	2L:13617364-13622228	+	2L:13617364-13622228	+	1	Intronic	-0.886	-0.516
XLOC_001867	2L:13622299-13624883	+	2L:13622299-13624883	+	1	Intronic	-1.573	-1.301
XLOC_001892	2L:13885705-13886204	+	2L:13885705-13886204	+	1	Intronic	0.596	1.568
XLOC_001893	2L:13886803-13887277	+	2L:13886803-13887277	+	1	Intronic	0.519	1.493
XLOC_001897	2L:13918317-13922856	+	2L:13918317-13922856	+	1	Anti-Sense	-2.36	-0.748
XLOC_001935	2L:14335112-14335580	+	2L:14335112-14335580	+	1	Intronic	-1.998	-0.964
XLOC_002035	2L:15063779-15067389	+	2L:15063779-15067389	+	1	Anti-Sense	0.178	-2.869
XLOC_002038	2L:15089564-15090135	+	2L:15089564-15090135	+	1	Intronic	-2.751	-0.237
XLOC_002039	2L:15094243-15094658	+	2L:15094243-15094658	+	1	Intronic	-3.013	0.026
XLOC_002190	2L:16037709-16038723	+	2L:16037709-16038723	+	1	Intronic	-2.293	-0.366
XLOC_002278	2L:16564518-16576903	+	2L:16564518-16576903	+	1	Intronic	-1.555	-0.079
XLOC_002279	2L:16576966-16577963	+	2L:16576966-16577963	+	1	Intronic	-2.392	-0.808
XLOC_002285	2L:16587818-16589361	+	2L:16587818-16589361	+	1	Intronic	-2.19	-0.979
XLOC_002290	2L:16625060-16634091	+	2L:16625060-16634091	+	1	Anti-Sense	-1.724	-0.405
XLOC_002294	2L:16692335-16693566	+	2L:16692335-16693566	+	1	Intronic	-0.194	-0.824
XLOC_002295	2L:16696822-16697280	+	2L:16696822-16697280	+	1	Intronic	0.183	-0.2
XLOC_002304	2L:16774859-16775210	+	2L:16774859-16775210	+	1	Intronic	2.853	4.192
XLOC_002316	2L:16901602-16902206	+	2L:16901602-16902206	+	1	Anti-Sense	-0.293	-0.996
XLOC_002317	2L:16904752-16905289	+	2L:16904752-16905289	+	1	Intronic	-0.534	0.505
XLOC_002388	2L:17394511-17395264	+	2L:17394511-17395264	+	1	Intronic	1.443	2.871
XLOC_002389	2L:17395586-17396514	+	2L:17395586-17396514	+	1	Intronic	1.432	2.816
XLOC_002390	2L:17396917-17397599	+	2L:17396917-17397599	+	1	Intronic	1.451	2.884
XLOC_002391	2L:17397692-17398482	+	2L:17397692-17398482	+	1	Intronic	1.139	2.57
XLOC_002392	2L:17399392-17399573	+	2L:17399392-17399573	+	1	Intronic	0.778	2.549
XLOC_002393	2L:17400100-17400241	+	2L:17400100-17400241	+	1	Intronic	1.673	3.221
XLOC_002485	2L:18124334-18125045	+	2L:18124334-18125045	+	1	Anti-Sense	-0.883	0.563
XLOC_002486	2L:18125329-18125837	+	2L:18125329-18125837	+	1	Anti-Sense	-0.913	0.774
XLOC_002487	2L:18126130-18126382	+	2L:18126130-18126382	+	1	Intronic	-0.899	1.027
XLOC_002511	2L:18344866-18345488	+	2L:18344866-18345488	+	1	Intronic	-2.081	-1.65
XLOC_002512	2L:18353006-18355930	+	2L:18353006-18355930	+	1	Intronic	-0.768	-0.659
XLOC_002513	2L:18359054-18362833	+	2L:18359054-18362833	+	1	Intronic	-0.835	0.068
XLOC_002514	2L:18362932-18366041	+	2L:18362932-18366041	+	1	Intronic	-1.312	-1.211
XLOC_002522	2L:18442512-18443225	+	2L:18442512-18443225	+	1	Anti-Sense	1.227	-0.755
XLOC_002548	2L:18619669-18620736	+	2L:18619669-18620736	+	1	Intronic	1.248	1.706
XLOC_002549	2L:18620818-18621833	+	2L:18620818-18621833	+	1	Intronic	1.054	1.491
XLOC_002550	2L:18631895-18633620	+	2L:18631895-18633620	+	1	Intronic	1.306	1.821
XLOC_002551	2L:18638412-18644533	+	2L:18638412-18644533	+	1	Intronic	1.064	1.59
XLOC_002552	2L:18645181-18646504	+	2L:18645181-18646504	+	1	Intronic	0.431	0.938
XLOC_002553	2L:18649725-18654520	+	2L:18649725-18654520	+	1	Anti-Sense	0.92	1.46
XLOC_002554	2L:18654688-18655697	+	2L:18654688-18655697	+	1	Intronic	0.363	0.897
XLOC_002555	2L:18656353-18656733	+	2L:18656353-18656733	+	1	Intronic	0.314	0.898
XLOC_002558	2L:18678026-18678303	+	2L:18678026-18678303	+	1	Intronic	1.713	2.948
XLOC_002613	2L:19191530-19192713	+	2L:19191530-19192713	+	1	Intronic	-1.021	-0.041
XLOC_002664	2L:19590562-19600051	+	2L:19590562-19600051	+	1	Intronic	-1.998	-1.194
XLOC_002666	2L:19601177-19603568	+	2L:19601177-19603568	+	1	Anti-Sense	-0.911	0.184
XLOC_002667	2L:19603851-19605480	+	2L:19603851-19605480	+	1	Anti-Sense	-1.227	-0.131
XLOC_002668	2L:19605698-19606113	+	2L:19605698-19606113	+	1	Intronic	-1.999	-0.243
XLOC_002669	2L:19621084-19626001	+	2L:19621084-19626001	+	1	Intronic	-0.743	0.486
XLOC_002670	2L:19626195-19639384	+	2L:19626195-19639384	+	1	Intronic	-1.365	-0.076
XLOC_002671	2L:19639462-19641212	+	2L:19639462-19641212	+	1	Intronic	-2.009	-0.634
XLOC_002672	2L:19641358-19643198	+	2L:19641358-19643198	+	1	Anti-Sense	-2.117	-0.785
XLOC_002674	2L:19644668-19652745	+	2L:19644668-19652745	+	1	Intronic	-0.919	0.127
XLOC_002675	2L:19674006-19676604	+	2L:19674006-19676604	+	1	Intronic	-1.481	-0.335
XLOC_002676	2L:19676663-19677250	+	2L:19676663-19677250	+	1	Intronic	-2.639	-0.889
XLOC_002678	2L:19678845-19681790	+	2L:19678845-19681790	+	1	Intronic	-1.898	-0.789
XLOC_002680	2L:19683655-19685581	+	2L:19683655-19685581	+	1	Intronic	-2.082	-0.815
XLOC_002685	2L:19693328-19693650	+	2L:19693328-19693650	+	1	Intronic	-3.954	-1.45
XLOC_002686	2L:19694947-19695248	+	2L:19694947-19695248	+	1	Intronic	-2.851	-0.653
XLOC_002687	2L:19712670-19714882	+	2L:19712670-19714882	+	1	Intronic	-0.862	0.288
XLOC_002688	2L:19715045-19715290	+	2L:19715045-19715290	+	1	Intronic	-2.99	-1.096
XLOC_002689	2L:19715961-19716985	+	2L:19715961-19716985	+	1	Intronic	-1.95	-0.714
XLOC_002695	2L:19778979-19780989	+	2L:19778979-19780989	+	1	Anti-Sense	-6.403	1.156
XLOC_002715	2L:19872349-19874907	+	2L:19872349-19874907	+	1	Intronic	-2.144	-0.304
XLOC_002759	2L:20322616-20324706	+	2L:20322616-20324706	+	1	Intronic	-1.04	-0.065
XLOC_002760	2L:20324786-20324941	+	2L:20324786-20324941	+	1	Intronic	-3.38	-1.261
XLOC_002761	2L:20326216-20327101	+	2L:20326216-20327101	+	1	Intronic	-1.347	-0.317
XLOC_002762	2L:20327387-20327920	+	2L:20327387-20327920	+	1	Intronic	-1.913	-0.393
XLOC_002763	2L:20328253-20328555	+	2L:20328253-20328555	+	1	Intronic	-3.051	-0.68
XLOC_002764	2L:20328660-20329891	+	2L:20328660-20329891	+	1	Intronic	-1.78	-0.716
XLOC_002766	2L:20336596-20336894	+	2L:20336596-20336894	+	1	Intronic	-0.652	0.706
XLOC_002768	2L:20350923-20351179	+	2L:20350923-20351179	+	1	Intronic	-0.454	0.561
XLOC_002777	2L:20435017-20435800	+	2L:20435017-20435800	+	1	Intronic	-1.649	-0.685
XLOC_002778	2L:20436346-20439536	+	2L:20436346-20439536	+	1	Anti-Sense	-0.537	-0.1
XLOC_002779	2L:20440109-20440549	+	2L:20440109-20440549	+	1	Intronic	-2.737	-1.104
XLOC_002787	2L:20584652-20586050	+	2L:20584652-20586050	+	1	Anti-Sense	-2.902	-0.59
XLOC_002842	2L:21108368-21108754	+	2L:21108368-21108754	+	1	Intronic	-0.211	1.265
XLOC_002843	2L:21108999-21109709	+	2L:21108999-21109709	+	1	Intronic	-0.404	1.06
XLOC_002844	2L:21118328-21119749	+	2L:21118328-21119749	+	1	Intronic	0.65	2.045
XLOC_002845	2L:21121776-21122167	+	2L:21121776-21122167	+	1	Intronic	-0.135	1.476
XLOC_002846	2L:21123724-21124131	+	2L:21123724-21124131	+	1	Intronic	0.118	1.722
XLOC_002859	2L:21265887-21267161	+	2L:21265887-21267161	+	1	Intronic	0.227	0.787
XLOC_002860	2L:21267727-21268727	+	2L:21267727-21268727	+	1	Intronic	-0.055	0.488
XLOC_002861	2L:21271061-21271267	+	2L:21271061-21271267	+	1	Intronic	-2.664	-1.343
XLOC_002862	2L:21271468-21271687	+	2L:21271468-21271687	+	1	Intronic	-2.491	-1.19
XLOC_002871	2L:21346988-21347728	+	2L:21346988-21347728	+	1	Intronic	-0.801	0.105
XLOC_002872	2L:21355165-21355469	+	2L:21355165-21355469	+	1	Intronic	-0.328	1.433
XLOC_002876	2L:21372464-21373091	+	2L:21372464-21373091	+	1	Intronic	1.502	2.143
XLOC_002878	2L:21382356-21383005	+	2L:21382356-21383005	+	1	Intronic	0.883	2.476
XLOC_002879	2L:21383412-21383588	+	2L:21383412-21383588	+	1	Intronic	-2.046	1.196
XLOC_002903	2L:21635736-21637642	+	2L:21635736-21637642	+	1	Intronic	-2.105	-0.408
XLOC_002906	2L:21665926-21666567	+	2L:21665926-21666567	+	1	Anti-Sense	-5.546	0.544
XLOC_002913	2L:21691246-21691759	+	2L:21691246-21691759	+	1	Intronic	-2.133	-0.605
XLOC_002914	2L:21701195-21701610	+	2L:21701195-21701610	+	1	Intronic	-3.184	-1.117
XLOC_002915	2L:21701976-21704317	+	2L:21701976-21704317	+	1	Intronic	-2.327	-0.857
XLOC_002916	2L:21704730-21706019	+	2L:21704730-21706019	+	1	Intronic	-2.115	-0.329
XLOC_002917	2L:21707738-21710553	+	2L:21707738-21710553	+	1	Intronic	-1.62	-0.037
XLOC_002918	2L:21711803-21712753	+	2L:21711803-21712753	+	1	Intronic	-1.932	-0.017
XLOC_002920	2L:21717741-21718246	+	2L:21717741-21718246	+	1	Intronic	-3.067	-0.411
XLOC_002922	2L:21719308-21719510	+	2L:21719308-21719510	+	1	Intronic	-4.386	-1.235
XLOC_002923	2L:21719645-21719858	+	2L:21719645-21719858	+	1	Intronic	-3.767	-0.897
XLOC_002989	2L:22150742-22151217	+	2L:22150742-22151217	+	1	Intronic	-0.445	0.265
XLOC_002991	2L:22155497-22156483	+	2L:22155497-22156483	+	1	Intronic	-0.696	-0.057
XLOC_003015	2L:22319124-22320228	+	2L:22319124-22320228	+	1	Intronic	0.312	-2.101
XLOC_003017	2L:22343342-22344540	+	2L:22343342-22344540	+	1	Intronic	1.015	-1.572
XLOC_003018	2L:22351239-22351663	+	2L:22351239-22351663	+	1	Intronic	0.282	-3.504
XLOC_003020	2L:22361463-22362878	+	2L:22361463-22362878	+	1	Intronic	0.145	-2.206
XLOC_003022	2L:22436377-22437098	+	2L:22543645-22544366	+	1	Intronic	-0.655	-0.639
XLOC_003055	2L:22739320-22739796	+	2L:22846588-22847064	+	1	Intronic	-0.303	-0.207
XLOC_003056	2L:22740329-22741693	+	2L:22847597-22848961	+	1	Intronic	0.878	0.983
XLOC_003064	2L:22822304-22825797	+	2L:22929572-22933065	+	1	Intronic	-0.328	0.383
XLOC_003076	2L:22876017-22879665	+	2L:22983285-22986933	+	1	Intronic	1.919	2.427
XLOC_003077	2L:22879856-22880088	+	2L:22987124-22987356	+	1	Intronic	1.944	2.479
XLOC_003078	2L:22881012-22881362	+	2L:22988280-22988630	+	1	Intronic	1.507	2.075
XLOC_003079	2L:22881786-22882120	+	2L:22989054-22989388	+	1	Intronic	1.691	2.26
XLOC_003080	2L:22882381-22882894	+	2L:22989649-22990162	+	1	Intronic	1.787	2.31
XLOC_003081	2L:22887455-22891581	+	2L:22994723-22998849	+	2	Intergenic	-0.303	0.19
XLOC_003082	2L:22891873-22893934	+	2L:22999141-23001202	+	1	Anti-Sense	-1.332	-0.616
XLOC_003083	2L:22894050-22901529	+	2L:23001318-23008797	+	1	Anti-Sense	-1.211	-0.774
XLOC_003090	2L:22975606-22978044	+	2L:23082874-23085312	+	4	Intergenic	-1.884	0.195
XLOC_003093	2L:13260-13497	-	2L:13260-13497	-	1	Intronic	2.465	1.927
XLOC_003094	2L:15929-16356	-	2L:15929-16356	-	1	Intronic	1.78	1.619
XLOC_003095	2L:16575-16922	-	2L:16575-16922	-	1	Intronic	1.487	1.354
XLOC_003097	2L:41716-47519	-	2L:41716-47519	-	1	Intronic	-1.224	0.374
XLOC_003104	2L:160522-161435	-	2L:160522-161435	-	1	Anti-Sense	0.053	0.557
XLOC_003106	2L:179886-182042	-	2L:179886-182042	-	1	Intronic	-3.325	0.32
XLOC_003109	2L:218977-220382	-	2L:218977-220382	-	1	Anti-Sense	-0.692	-0.171
XLOC_003110	2L:223469-223951	-	2L:223469-223951	-	1	Anti-Sense	-1.978	-0.785
XLOC_003111	2L:224432-226046	-	2L:224432-226046	-	1	Anti-Sense	-0.381	0.238
XLOC_003112	2L:226592-227103	-	2L:226592-227103	-	1	Intronic	-0.686	0.033
XLOC_003113	2L:228690-229141	-	2L:228690-229141	-	1	Intronic	0.431	1.5
XLOC_003114	2L:247046-248604	-	2L:247046-248604	-	1	Intronic	0.283	0.623
XLOC_003117	2L:291281-291562	-	2L:291281-291562	-	1	Intronic	-2.345	0.137
XLOC_003133	2L:469248-470421	-	2L:469248-470421	-	1	Intronic	-0.74	0.54
XLOC_003134	2L:470505-471229	-	2L:470505-471229	-	1	Intronic	-0.953	0.519
XLOC_003146	2L:742102-743332	-	2L:742102-743332	-	1	Intronic	-1.914	0.165
XLOC_003159	2L:844518-845833	-	2L:844518-845833	-	1	Intronic	0.448	1.228
XLOC_003173	2L:1033155-1033482	-	2L:1033155-1033482	-	1	Intronic	-4.44	0.168
XLOC_003176	2L:1115948-1116440	-	2L:1115948-1116440	-	1	Intronic	1.704	2.619
XLOC_003302	2L:1859808-1860941	-	2L:1859808-1860941	-	1	Intronic	-1.621	-0.068
XLOC_003303	2L:1863712-1863918	-	2L:1863712-1863918	-	1	Intronic	-4.14	-1.527
XLOC_003304	2L:1867379-1868933	-	2L:1867379-1868933	-	1	Intronic	-2.742	0.874
XLOC_003305	2L:1870204-1870867	-	2L:1870204-1870867	-	1	Anti-Sense	-2.395	-0.262
XLOC_003306	2L:1871495-1875007	-	2L:1871495-1875007	-	1	Anti-Sense	-1.731	-0.188
XLOC_003319	2L:1986175-1986365	-	2L:1986175-1986365	-	1	Intronic	2.639	3.432
XLOC_003320	2L:1986573-1986716	-	2L:1986573-1986716	-	1	Intronic	2.637	3.5
XLOC_003321	2L:1987227-1987351	-	2L:1987227-1987351	-	1	Intronic	3.066	3.73
XLOC_003346	2L:2165261-2165819	-	2L:2165261-2165819	-	1	Intronic	0.219	0.981
XLOC_003347	2L:2174277-2175677	-	2L:2174277-2175677	-	1	Intronic	0.584	1.002
XLOC_003433	2L:2785788-2787052	-	2L:2785788-2787052	-	1	Intronic	1.018	2.677
XLOC_003434	2L:2787467-2788219	-	2L:2787467-2788219	-	1	Intronic	-1.72	0.301
XLOC_003435	2L:2788533-2789018	-	2L:2788533-2789018	-	1	Intronic	-2.02	0.364
XLOC_003436	2L:2797733-2797990	-	2L:2797733-2797990	-	1	Anti-Sense	-4.164	-0.451
XLOC_003441	2L:2829060-2830115	-	2L:2829060-2830115	-	1	Intronic	-0.341	-2.607
XLOC_003458	2L:3078734-3079037	-	2L:3078734-3079037	-	1	Intronic	0.266	1.77
XLOC_003459	2L:3082544-3083065	-	2L:3082544-3083065	-	1	Intronic	-1.23	0.616
XLOC_003460	2L:3083529-3083793	-	2L:3083529-3083793	-	1	Intronic	-1.139	0.903
XLOC_003461	2L:3095006-3095843	-	2L:3095006-3095843	-	1	Intronic	-1.255	-0.046
XLOC_003462	2L:3095917-3097872	-	2L:3095917-3097872	-	1	Intronic	-1.034	0.097
XLOC_003464	2L:3132729-3133635	-	2L:3132729-3133635	-	1	Intronic	-2.053	-0.435
XLOC_003465	2L:3134402-3134698	-	2L:3134402-3134698	-	1	Intronic	-1.993	-0.535
XLOC_003466	2L:3135420-3137444	-	2L:3135420-3137444	-	1	Intronic	-1.123	-0.348
XLOC_003467	2L:3137537-3140060	-	2L:3137537-3140060	-	1	Intronic	-1.02	-0.131
XLOC_003483	2L:3278659-3279239	-	2L:3278659-3279239	-	1	Intronic	-0.334	0.613
XLOC_003489	2L:3301832-3303044	-	2L:3301832-3303044	-	1	Intronic	0.636	0.472
XLOC_003496	2L:3365677-3367241	-	2L:3365677-3367241	-	1	Intronic	0.835	1.221
XLOC_003505	2L:3410679-3411568	-	2L:3410679-3411568	-	1	Anti-Sense	-2.319	-0.701
XLOC_003506	2L:3412400-3413063	-	2L:3412400-3413063	-	1	Intronic	-2.911	-0.883
XLOC_003507	2L:3413141-3414727	-	2L:3413141-3414727	-	1	Intronic	-2.204	-0.673
XLOC_003508	2L:3415568-3416306	-	2L:3415568-3416306	-	1	Intronic	-2.573	-0.904
XLOC_003509	2L:3417451-3420609	-	2L:3417451-3420609	-	1	Anti-Sense	-1.875	-0.642
XLOC_003519	2L:3495926-3499316	-	2L:3495926-3499316	-	1	Intronic	-0.467	0.735
XLOC_003520	2L:3504647-3505036	-	2L:3504647-3505036	-	1	Intronic	-0.359	1.118
XLOC_003521	2L:3505113-3505528	-	2L:3505113-3505528	-	1	Intronic	-0.071	1.421
XLOC_003522	2L:3505784-3506556	-	2L:3505784-3506556	-	1	Intronic	1.084	2.309
XLOC_003550	2L:3644122-3644835	-	2L:3644122-3644835	-	1	Intronic	0.129	0.612
XLOC_003579	2L:3876090-3876617	-	2L:3876090-3876617	-	1	Intronic	-0.603	0.378
XLOC_003580	2L:3877185-3877854	-	2L:3877185-3877854	-	1	Intronic	0.249	1.126
XLOC_003581	2L:3891184-3892290	-	2L:3891184-3892290	-	1	Intronic	-2.191	-0.374
XLOC_003608	2L:4190827-4192629	-	2L:4190827-4192629	-	1	Intronic	0.832	1.682
XLOC_003609	2L:4192969-4193309	-	2L:4192969-4193309	-	1	Intronic	2.088	3.023
XLOC_003610	2L:4193866-4194517	-	2L:4193866-4194517	-	1	Intronic	-0.829	0.436
XLOC_003611	2L:4195921-4196392	-	2L:4195921-4196392	-	1	Intronic	1.764	1.856
XLOC_003633	2L:4469976-4470964	-	2L:4469976-4470964	-	1	Intronic	-1.387	0.145
XLOC_003634	2L:4471268-4471850	-	2L:4471268-4471850	-	1	Intronic	-2.677	-0.662
XLOC_003639	2L:4580886-4581311	-	2L:4580886-4581311	-	1	Intronic	-2.864	-0.702
XLOC_003640	2L:4581591-4582164	-	2L:4581591-4582164	-	1	Intronic	-2.249	-0.439
XLOC_003642	2L:4584037-4591369	-	2L:4584037-4591369	-	1	Intronic	-0.946	0.218
XLOC_003668	2L:4761146-4761533	-	2L:4761146-4761533	-	1	Intronic	-3.623	0.046
XLOC_003675	2L:4844783-4845070	-	2L:4844783-4845070	-	1	Intronic	3.946	3.8
XLOC_003680	2L:4915844-4917012	-	2L:4915844-4917012	-	1	Intronic	-1.004	0.332
XLOC_003681	2L:4917200-4918185	-	2L:4917200-4918185	-	1	Intronic	-1.454	0.103
XLOC_003687	2L:5007296-5007808	-	2L:5007296-5007808	-	1	Intronic	-0.193	0.507
XLOC_003700	2L:5245487-5263746	-	2L:5245487-5263746	-	1	Anti-Sense	-0.767	0.096
XLOC_003701	2L:5263899-5271262	-	2L:5263899-5271262	-	2	Anti-Sense	1.032	1.693
XLOC_003771	2L:5784895-5787942	-	2L:5784895-5787942	-	1	Intronic	-0.777	0.224
XLOC_003784	2L:5874353-5875824	-	2L:5874353-5875824	-	1	Intronic	-0.07	-0.94
XLOC_003851	2L:6341364-6341921	-	2L:6341364-6341921	-	1	Anti-Sense	-0.519	1.15
XLOC_003867	2L:6540899-6544421	-	2L:6540899-6544421	-	1	Intronic	-0.949	-1.405
XLOC_003872	2L:6577789-6578854	-	2L:6577789-6578854	-	1	Intronic	-1.88	0.395
XLOC_003873	2L:6579587-6580324	-	2L:6579587-6580324	-	1	Intronic	-2.884	-0.358
XLOC_003893	2L:6683318-6683628	-	2L:6683318-6683628	-	1	Intronic	-0.433	-0.488
XLOC_003902	2L:6791992-6792169	-	2L:6791992-6792169	-	1	Intronic	0.97	2.322
XLOC_003903	2L:6792562-6793112	-	2L:6792562-6793112	-	1	Intronic	0.564	1.887
XLOC_003904	2L:6793489-6794140	-	2L:6793489-6794140	-	1	Intronic	2.633	4.023
XLOC_003922	2L:6863162-6863399	-	2L:6863162-6863399	-	1	Intronic	-0.753	-0.621
XLOC_003923	2L:6865088-6865458	-	2L:6865088-6865458	-	1	Intronic	-1.092	-1.867
XLOC_003924	2L:6865973-6866729	-	2L:6865973-6866729	-	1	Intronic	-0.43	-0.679
XLOC_003925	2L:6866861-6870126	-	2L:6866861-6870126	-	1	Intronic	0.354	-0.229
XLOC_003929	2L:6939737-6940136	-	2L:6939737-6940136	-	1	Intronic	-2.46	-0.023
XLOC_003939	2L:7020321-7020778	-	2L:7020321-7020778	-	1	Intronic	0.917	1.031
XLOC_003940	2L:7022097-7022258	-	2L:7022097-7022258	-	1	Anti-Sense	1.102	1.332
XLOC_003941	2L:7022366-7022878	-	2L:7022366-7022878	-	1	Anti-Sense	0.952	1.084
XLOC_003969	2L:7193380-7194316	-	2L:7193380-7194316	-	1	Intronic	-1.473	-0.602
XLOC_003971	2L:7200498-7200896	-	2L:7200498-7200896	-	1	Intronic	0.808	1.183
XLOC_003972	2L:7202781-7203215	-	2L:7202781-7203215	-	1	Intronic	0.851	1.218
XLOC_003973	2L:7212000-7212283	-	2L:7212000-7212283	-	1	Intronic	1.169	1.716
XLOC_003974	2L:7213039-7214911	-	2L:7213039-7214911	-	1	Intronic	1.159	1.744
XLOC_003975	2L:7215022-7216191	-	2L:7215022-7216191	-	1	Intronic	1.258	1.782
XLOC_003976	2L:7235004-7236140	-	2L:7235004-7236140	-	1	Intronic	-0.267	0.592
XLOC_003977	2L:7236700-7237611	-	2L:7236700-7237611	-	1	Intronic	0.161	1.076
XLOC_004014	2L:7475669-7476060	-	2L:7475669-7476060	-	1	Anti-Sense	-1.613	-0.265
XLOC_004015	2L:7480339-7480552	-	2L:7480339-7480552	-	1	Intronic	-0.469	0.8
XLOC_004016	2L:7483918-7492086	-	2L:7483918-7492086	-	1	Intronic	-1.502	-0.423
XLOC_004019	2L:7502363-7503936	-	2L:7502363-7503936	-	1	Intronic	-1.56	-0.938
XLOC_004020	2L:7518695-7520668	-	2L:7518695-7520668	-	1	Anti-Sense	-1.003	-0.286
XLOC_004021	2L:7536499-7537760	-	2L:7536499-7537760	-	1	Intronic	-1.697	-0.328
XLOC_004022	2L:7550524-7555656	-	2L:7550524-7555656	-	1	Intronic	-0.556	-0.41
XLOC_004024	2L:7562349-7562944	-	2L:7562349-7562944	-	1	Intronic	-2.051	-1.532
XLOC_004025	2L:7563312-7564301	-	2L:7563312-7564301	-	1	Intronic	-1.466	-1.11
XLOC_004041	2L:7649516-7650970	-	2L:7649516-7650970	-	1	Intronic	-1.598	0.155
XLOC_004042	2L:7651926-7653739	-	2L:7651926-7653739	-	1	Intronic	-1.391	0.274
XLOC_004043	2L:7673399-7673948	-	2L:7673399-7673948	-	1	Intronic	-2.336	-0.077
XLOC_004047	2L:7696240-7696593	-	2L:7696240-7696593	-	1	Intronic	-0.444	0.966
XLOC_004058	2L:7794772-7795505	-	2L:7794772-7795505	-	1	Intronic	0.36	1.335
XLOC_004069	2L:7911879-7912236	-	2L:7911879-7912236	-	1	Intronic	-0.706	0.703
XLOC_004070	2L:7912596-7913678	-	2L:7912596-7913678	-	1	Intronic	-0.28	0.743
XLOC_004071	2L:7914496-7915311	-	2L:7914496-7915311	-	1	Intronic	-0.125	0.917
XLOC_004072	2L:7915393-7916356	-	2L:7915393-7916356	-	1	Intronic	-0.23	0.785
XLOC_004073	2L:7934405-7935357	-	2L:7934405-7935357	-	1	Intronic	-0.399	0.623
XLOC_004074	2L:7935663-7936232	-	2L:7935663-7936232	-	1	Intronic	-0.376	0.806
XLOC_004075	2L:7937464-7937689	-	2L:7937464-7937689	-	1	Intronic	-0.836	0.937
XLOC_004076	2L:7937832-7938394	-	2L:7937832-7938394	-	1	Intronic	-0.63	0.576
XLOC_004077	2L:7948546-7948968	-	2L:7948546-7948968	-	1	Intronic	-0.75	0.675
XLOC_004078	2L:7950023-7950730	-	2L:7950023-7950730	-	1	Intronic	-0.334	0.721
XLOC_004079	2L:7950978-7951685	-	2L:7950978-7951685	-	1	Intronic	-0.696	0.464
XLOC_004080	2L:7953539-7956807	-	2L:7953539-7956807	-	1	Intronic	0.285	1.252
XLOC_004081	2L:7956890-7957172	-	2L:7956890-7957172	-	1	Intronic	-0.558	0.861
XLOC_004095	2L:8141669-8141989	-	2L:8141669-8141989	-	1	Intronic	-1.85	-0.728
XLOC_004103	2L:8196431-8196581	-	2L:8196431-8196581	-	1	Anti-Sense	1.426	2.388
XLOC_004109	2L:8223452-8223803	-	2L:8223452-8223803	-	1	Intronic	0.668	1.348
XLOC_004110	2L:8229085-8230046	-	2L:8229085-8230046	-	1	Intronic	-0.329	0.474
XLOC_004117	2L:8266450-8266963	-	2L:8266450-8266963	-	1	Intronic	-2.321	-1.481
XLOC_004118	2L:8267879-8268526	-	2L:8267879-8268526	-	1	Intronic	-0.829	-0.6
XLOC_004119	2L:8268734-8269998	-	2L:8268734-8269998	-	1	Intronic	-0.627	-0.296
XLOC_004120	2L:8270155-8270943	-	2L:8270155-8270943	-	1	Intronic	-0.546	-0.169
XLOC_004125	2L:8291926-8296406	-	2L:8291926-8296406	-	1	Anti-Sense	-1.483	-1.728
XLOC_004194	2L:8704697-8705318	-	2L:8704697-8705318	-	1	Anti-Sense	-0.768	0.021
XLOC_004195	2L:8720483-8723171	-	2L:8720483-8723171	-	1	Intronic	0.587	1.446
XLOC_004262	2L:9069838-9070478	-	2L:9069838-9070478	-	1	Intronic	-3.815	-0.027
XLOC_004330	2L:9556421-9560083	-	2L:9556421-9560083	-	1	Intronic	-0.941	0.252
XLOC_004331	2L:9560587-9564995	-	2L:9560587-9564995	-	1	Intronic	-1.924	-0.597
XLOC_004348	2L:9718546-9719792	-	2L:9718546-9719792	-	1	Intronic	-2.068	-0.189
XLOC_004349	2L:9720174-9722740	-	2L:9720174-9722740	-	1	Intronic	-2.388	-0.679
XLOC_004350	2L:9727261-9732911	-	2L:9727261-9732911	-	1	Anti-Sense	-1.378	0.208
XLOC_004351	2L:9744636-9746403	-	2L:9744636-9746403	-	1	Intronic	-1.751	0.016
XLOC_004367	2L:9905426-9905858	-	2L:9905426-9905858	-	1	Intronic	0.605	1.927
XLOC_004396	2L:10223470-10224314	-	2L:10223470-10224314	-	1	Anti-Sense	-1.179	-0.466
XLOC_004399	2L:10230124-10230878	-	2L:10230124-10230878	-	1	Intronic	0.296	0.574
XLOC_004426	2L:10466496-10467061	-	2L:10466496-10467061	-	1	Intronic	-2.228	-0.309
XLOC_004427	2L:10467207-10471399	-	2L:10467207-10471399	-	1	Intronic	-1.367	-0.227
XLOC_004428	2L:10495140-10496572	-	2L:10495140-10496572	-	1	Intronic	-0.152	0.287
XLOC_004429	2L:10496885-10497232	-	2L:10496885-10497232	-	1	Intronic	-0.932	0.056
XLOC_004430	2L:10499628-10500625	-	2L:10499628-10500625	-	1	Intronic	-0.696	-0.093
XLOC_004431	2L:10501268-10502809	-	2L:10501268-10502809	-	1	Intronic	0.002	0.561
XLOC_004432	2L:10502870-10505719	-	2L:10502870-10505719	-	1	Intronic	0.113	0.612
XLOC_004490	2L:11037278-11037862	-	2L:11037278-11037862	-	1	Intronic	-1.132	-0.34
XLOC_004491	2L:11060739-11061080	-	2L:11060739-11061080	-	1	Intronic	-1.659	-0.496
XLOC_004492	2L:11061461-11062607	-	2L:11061461-11062607	-	1	Intronic	-0.878	-0.379
XLOC_004493	2L:11063015-11063791	-	2L:11063015-11063791	-	1	Intronic	-0.489	-0.041
XLOC_004494	2L:11063909-11064865	-	2L:11063909-11064865	-	1	Intronic	-0.573	-0.07
XLOC_004608	2L:11799420-11799713	-	2L:11799420-11799713	-	1	Intronic	-0.94	-0.084
XLOC_004609	2L:11799793-11800116	-	2L:11799793-11800116	-	1	Intronic	-2.044	-0.912
XLOC_004610	2L:11800758-11801135	-	2L:11800758-11801135	-	1	Intronic	-1.654	-0.565
XLOC_004611	2L:11801792-11802219	-	2L:11801792-11802219	-	1	Intronic	-0.685	-0.405
XLOC_004612	2L:11806183-11807864	-	2L:11806183-11807864	-	1	Intronic	0.955	1.453
XLOC_004614	2L:11830834-11832724	-	2L:11830834-11832724	-	1	Intronic	-1.111	0.289
XLOC_004620	2L:11886223-11888227	-	2L:11886223-11888227	-	1	Intronic	-2.323	-0.891
XLOC_004622	2L:11889586-11892581	-	2L:11889586-11892581	-	1	Intronic	-2.164	-0.819
XLOC_004623	2L:11900110-11903931	-	2L:11900110-11903931	-	1	Intronic	-1.081	0.346
XLOC_004675	2L:12422265-12423317	-	2L:12422265-12423317	-	1	Intronic	-1.47	-0.408
XLOC_004680	2L:12444543-12445676	-	2L:12444543-12445676	-	1	Intronic	-0.11	0.64
XLOC_004684	2L:12461464-12462025	-	2L:12461464-12462025	-	1	Intronic	-1.197	-0.221
XLOC_004685	2L:12462904-12463193	-	2L:12462904-12463193	-	1	Intronic	-2.863	-1.456
XLOC_004686	2L:12521012-12523353	-	2L:12521012-12523353	-	1	Intronic	-1.587	-0.635
XLOC_004687	2L:12523465-12529035	-	2L:12523465-12529035	-	1	Intronic	-0.877	0.168
XLOC_004688	2L:12529099-12536256	-	2L:12529099-12536256	-	1	Intronic	-0.43	0.615
XLOC_004774	2L:13032177-13036285	-	2L:13032177-13036285	-	1	Intronic	0.323	1.369
XLOC_004775	2L:13036525-13044611	-	2L:13036525-13044611	-	1	Intronic	1.181	2.151
XLOC_004795	2L:13170795-13171293	-	2L:13170795-13171293	-	1	Intronic	-0.809	0.052
XLOC_004816	2L:13507304-13508391	-	2L:13507304-13508391	-	1	Intronic	0.294	0.855
XLOC_004817	2L:13509221-13509388	-	2L:13509221-13509388	-	1	Intronic	0.226	1.003
XLOC_004820	2L:13516977-13522116	-	2L:13516977-13522116	-	1	Intronic	-1.582	-0.753
XLOC_004821	2L:13527466-13534904	-	2L:13527466-13534904	-	1	Anti-Sense	-0.563	0.22
XLOC_004857	2L:13776212-13777730	-	2L:13776212-13777730	-	1	Anti-Sense	0.144	1.339
XLOC_004858	2L:13778291-13779097	-	2L:13778291-13779097	-	1	Intronic	-0.293	0.978
XLOC_004902	2L:14189327-14195728	-	2L:14189327-14195728	-	1	Intronic	0.249	1.098
XLOC_004903	2L:14196321-14196864	-	2L:14196321-14196864	-	1	Intronic	-0.332	0.633
XLOC_004904	2L:14198306-14198535	-	2L:14198306-14198535	-	1	Intronic	-1.49	-0.094
XLOC_004905	2L:14198605-14201739	-	2L:14198605-14201739	-	1	Intronic	-0.727	0.065
XLOC_004906	2L:14202160-14217016	-	2L:14202160-14217016	-	1	Intronic	0.039	0.751
XLOC_004907	2L:14217838-14221940	-	2L:14217838-14221940	-	1	Intronic	-0.119	0.552
XLOC_004985	2L:14670245-14670878	-	2L:14670245-14670878	-	1	Intronic	0.067	0.631
XLOC_004986	2L:14672213-14674614	-	2L:14672213-14674614	-	1	Intronic	0.114	0.705
XLOC_004987	2L:14674958-14675864	-	2L:14674958-14675864	-	1	Intronic	0.252	0.781
XLOC_004988	2L:14685707-14686287	-	2L:14685707-14686287	-	1	Intronic	-0.015	0.705
XLOC_005027	2L:14913876-14914098	-	2L:14913876-14914098	-	1	Intronic	-4.376	-0.584
XLOC_005028	2L:14937995-14938737	-	2L:14937995-14938737	-	1	Intronic	-3.427	-0.494
XLOC_005040	2L:14979270-14979469	-	2L:14979270-14979469	-	1	Intronic	-2.407	-1.906
XLOC_005041	2L:14980314-14982167	-	2L:14980314-14982167	-	1	Intronic	-0.965	-0.903
XLOC_005042	2L:14982239-14983526	-	2L:14982239-14983526	-	1	Intronic	-1.312	-1.21
XLOC_005163	2L:15741807-15742423	-	2L:15741807-15742423	-	1	Intronic	-0.455	-2.052
XLOC_005229	2L:16243593-16245769	-	2L:16243593-16245769	-	1	Anti-Sense	-1.873	-1.123
XLOC_005231	2L:16247442-16248372	-	2L:16247442-16248372	-	1	Intronic	1.863	3.068
XLOC_005232	2L:16251863-16252114	-	2L:16251863-16252114	-	1	Intronic	1.29	2.051
XLOC_005233	2L:16252364-16253000	-	2L:16252364-16253000	-	1	Intronic	1.301	2.054
XLOC_005234	2L:16253060-16253678	-	2L:16253060-16253678	-	1	Intronic	1.393	2.152
XLOC_005237	2L:16272804-16273889	-	2L:16272804-16273889	-	1	Intronic	1.394	1.912
XLOC_005238	2L:16274169-16274942	-	2L:16274169-16274942	-	1	Intronic	1.381	1.888
XLOC_005239	2L:16275459-16275808	-	2L:16275459-16275808	-	1	Intronic	1.434	2.028
XLOC_005244	2L:16315110-16321916	-	2L:16315110-16321916	-	1	Intronic	1.087	1.926
XLOC_005245	2L:16322029-16322578	-	2L:16322029-16322578	-	1	Intronic	1.75	2.562
XLOC_005246	2L:16322741-16322878	-	2L:16322741-16322878	-	1	Intronic	2.23	3.049
XLOC_005247	2L:16323187-16323328	-	2L:16323187-16323328	-	1	Intronic	0.896	1.862
XLOC_005248	2L:16323547-16324304	-	2L:16323547-16324304	-	1	Intronic	1.273	2.045
XLOC_005251	2L:16351569-16351799	-	2L:16351569-16351799	-	1	Intronic	2.148	2.228
XLOC_005274	2L:16479146-16479491	-	2L:16479146-16479491	-	1	Intronic	-3.909	-0.858
XLOC_005275	2L:16479753-16480781	-	2L:16479753-16480781	-	1	Intronic	-2.459	-0.516
XLOC_005288	2L:16724994-16725518	-	2L:16724994-16725518	-	1	Intronic	1.858	2.766
XLOC_005299	2L:16843987-16844394	-	2L:16843987-16844394	-	1	Intronic	0.27	1.301
XLOC_005300	2L:16845123-16845577	-	2L:16845123-16845577	-	1	Intronic	1.087	1.933
XLOC_005382	2L:17375276-17379726	-	2L:17375276-17379726	-	1	Intronic	-1.594	-1.012
XLOC_005383	2L:17386661-17388951	-	2L:17386661-17388951	-	1	Intronic	-2.331	-0.783
XLOC_005385	2L:17420420-17421570	-	2L:17420420-17421570	-	1	Intronic	-0.145	0.974
XLOC_005414	2L:17656002-17657051	-	2L:17656002-17657051	-	1	Intronic	-1.68	-0.532
XLOC_005415	2L:17668156-17676125	-	2L:17668156-17676125	-	1	Intronic	-1.549	-0.489
XLOC_005417	2L:17679882-17687530	-	2L:17679882-17687530	-	1	Intronic	-1.979	-0.901
XLOC_005420	2L:17696329-17704166	-	2L:17696329-17704166	-	1	Intronic	-1.877	-0.742
XLOC_005430	2L:17746661-17747307	-	2L:17746661-17747307	-	1	Intronic	-2.646	-0.913
XLOC_005431	2L:17748058-17748958	-	2L:17748058-17748958	-	1	Intronic	-2.028	-0.455
XLOC_005482	2L:18136748-18137143	-	2L:18136748-18137143	-	1	Intronic	-0.004	1.375
XLOC_005484	2L:18141253-18141646	-	2L:18141253-18141646	-	1	Intronic	0.183	0.903
XLOC_005485	2L:18149597-18149830	-	2L:18149597-18149830	-	1	Intronic	0.353	0.702
XLOC_005486	2L:18149887-18150490	-	2L:18149887-18150490	-	1	Intronic	0.115	0.368
XLOC_005496	2L:18264523-18264801	-	2L:18264523-18264801	-	1	Intronic	-5.065	-0.887
XLOC_005525	2L:18503047-18503645	-	2L:18503047-18503645	-	1	Intronic	-1.488	-0.107
XLOC_005531	2L:18536012-18536743	-	2L:18536012-18536743	-	1	Intronic	-0.604	0.126
XLOC_005532	2L:18537701-18538015	-	2L:18537701-18538015	-	1	Intronic	-0.437	0.58
XLOC_005533	2L:18538614-18539441	-	2L:18538614-18539441	-	1	Intronic	0.027	0.788
XLOC_005534	2L:18540774-18541180	-	2L:18540774-18541180	-	1	Intronic	-0.146	0.785
XLOC_005535	2L:18542050-18542321	-	2L:18542050-18542321	-	1	Intronic	-0.728	0.342
XLOC_005536	2L:18543975-18546089	-	2L:18543975-18546089	-	1	Intronic	-0.936	-0.134
XLOC_005587	2L:18963474-18963992	-	2L:18963474-18963992	-	1	Intronic	0.113	0.958
XLOC_005658	2L:19408049-19408454	-	2L:19408049-19408454	-	1	Intronic	-0.458	0.493
XLOC_005659	2L:19408812-19409024	-	2L:19408812-19409024	-	1	Intronic	-2.292	-0.418
XLOC_005661	2L:19439204-19439494	-	2L:19439204-19439494	-	1	Intronic	-0.041	0.966
XLOC_005662	2L:19439552-19439684	-	2L:19439552-19439684	-	1	Intronic	-0.692	0.635
XLOC_005663	2L:19439805-19440634	-	2L:19439805-19440634	-	1	Intronic	0.617	1.279
XLOC_005679	2L:19574127-19574730	-	2L:19574127-19574730	-	1	Intronic	1.391	1.837
XLOC_005680	2L:19576196-19576756	-	2L:19576196-19576756	-	1	Intronic	1.58	2.002
XLOC_005709	2L:19754326-19755856	-	2L:19754326-19755856	-	1	Intronic	-1.307	-0.181
XLOC_005711	2L:19763080-19763368	-	2L:19763080-19763368	-	1	Intronic	-0.393	0.136
XLOC_005712	2L:19763500-19764058	-	2L:19763500-19764058	-	1	Intronic	1.219	1.884
XLOC_005807	2L:20703325-20703897	-	2L:20703325-20703897	-	1	Intronic	-3.48	-0.67
XLOC_005808	2L:20704834-20706685	-	2L:20704834-20706685	-	1	Intronic	-2.3	-0.66
XLOC_005809	2L:20706861-20708183	-	2L:20706861-20708183	-	1	Intronic	-2.562	-0.684
XLOC_005827	2L:20876617-20876909	-	2L:20876617-20876909	-	1	Intronic	1.604	2.47
XLOC_005828	2L:20877894-20879061	-	2L:20877894-20879061	-	1	Intronic	0.117	1.09
XLOC_005829	2L:20879138-20881743	-	2L:20879138-20881743	-	1	Intronic	0.608	1.544
XLOC_005830	2L:20882682-20883736	-	2L:20882682-20883736	-	1	Intronic	0.141	1.107
XLOC_005831	2L:20896636-20901513	-	2L:20896636-20901513	-	1	Anti-Sense	0.569	1.22
XLOC_005832	2L:20902667-20902972	-	2L:20902667-20902972	-	1	Intronic	0.879	1.648
XLOC_005833	2L:20911394-20911811	-	2L:20911394-20911811	-	1	Intronic	-0.123	0.6
XLOC_005834	2L:20914123-20914512	-	2L:20914123-20914512	-	1	Intronic	0.483	1.143
XLOC_005835	2L:20914637-20915428	-	2L:20914637-20915428	-	1	Intronic	0.168	0.746
XLOC_005836	2L:20915534-20916037	-	2L:20915534-20916037	-	1	Intronic	0.525	1.188
XLOC_005846	2L:21058775-21059103	-	2L:21058775-21059103	-	1	Intronic	-3.312	-0.054
XLOC_005847	2L:21060950-21061682	-	2L:21060950-21061682	-	1	Intronic	-1.338	0.28
XLOC_005848	2L:21061761-21062177	-	2L:21061761-21062177	-	1	Intronic	-1.923	0.415
XLOC_005866	2L:21218852-21219128	-	2L:21218852-21219128	-	1	Intronic	1.62	2.45
XLOC_005867	2L:21219471-21219945	-	2L:21219471-21219945	-	1	Intronic	1.716	2.495
XLOC_005882	2L:21290844-21291633	-	2L:21290844-21291633	-	1	Anti-Sense	1.07	1.359
XLOC_005883	2L:21291963-21292188	-	2L:21291963-21292188	-	1	Anti-Sense	0.793	1.08
XLOC_005884	2L:21292241-21292967	-	2L:21292241-21292967	-	1	Anti-Sense	1.252	1.522
XLOC_005885	2L:21293321-21294173	-	2L:21293321-21294173	-	1	Intronic	1.14	1.403
XLOC_005886	2L:21294445-21295416	-	2L:21294445-21295416	-	1	Anti-Sense	1.578	1.805
XLOC_005887	2L:21295645-21295923	-	2L:21295645-21295923	-	1	Intronic	1.457	1.633
XLOC_005888	2L:21296051-21297627	-	2L:21296051-21297627	-	1	Anti-Sense	1.591	1.833
XLOC_005889	2L:21298091-21298310	-	2L:21298091-21298310	-	1	Intronic	0.826	1.087
XLOC_005890	2L:21298732-21300058	-	2L:21298732-21300058	-	1	Intronic	1.249	1.467
XLOC_005891	2L:21300194-21301386	-	2L:21300194-21301386	-	1	Intronic	1.352	1.568
XLOC_005892	2L:21305329-21306677	-	2L:21305329-21306677	-	1	Intronic	0.4	0.325
XLOC_005893	2L:21306824-21307110	-	2L:21306824-21307110	-	1	Intronic	-0.114	-0.198
XLOC_005894	2L:21307163-21308287	-	2L:21307163-21308287	-	1	Intronic	0.76	0.673
XLOC_005910	2L:21618903-21619131	-	2L:21618903-21619131	-	1	Intronic	0.053	0.687
XLOC_005911	2L:21619455-21620670	-	2L:21619455-21620670	-	1	Intronic	-0.463	0.022
XLOC_005912	2L:21621007-21621303	-	2L:21621007-21621303	-	1	Intronic	-1.649	-0.939
XLOC_005913	2L:21621381-21622249	-	2L:21621381-21622249	-	1	Intronic	0.258	0.743
XLOC_005914	2L:21622427-21623356	-	2L:21622427-21623356	-	1	Intronic	0.318	0.709
XLOC_005932	2L:21744118-21745005	-	2L:21744118-21745005	-	1	Intronic	-0.367	0.482
XLOC_005933	2L:21747737-21748398	-	2L:21747737-21748398	-	1	Intronic	0.816	1.568
XLOC_005934	2L:21748516-21749920	-	2L:21748516-21749920	-	1	Intronic	0.658	1.456
XLOC_005935	2L:21750134-21751166	-	2L:21750134-21751166	-	1	Intronic	0.844	1.561
XLOC_005936	2L:21751544-21753046	-	2L:21751544-21753046	-	1	Intronic	1.103	1.853
XLOC_005937	2L:21756667-21757161	-	2L:21756667-21757161	-	1	Intronic	0.924	1.136
XLOC_006031	2L:22407553-22407955	-	2L:22407553-22407955	-	1	Intergenic	-7.956	2.246
XLOC_006042	2L:22528947-22529776	-	2L:22636215-22637044	-	1	Intronic	-1.261	-0.446
XLOC_006043	2L:22533573-22535311	-	2L:22640841-22642579	-	1	Intronic	-0.712	0.03
XLOC_006044	2L:22535442-22535772	-	2L:22642710-22643040	-	1	Intronic	-0.869	0.27
XLOC_006047	2L:22552970-22553722	-	2L:22660238-22660990	-	1	Intronic	-2.128	-1.19
XLOC_006050	2L:22564187-22567356	-	2L:22671455-22674624	-	1	Intronic	-1.362	-0.643
XLOC_006051	2L:22567456-22567956	-	2L:22674724-22675224	-	1	Intronic	-1.992	-1.205
XLOC_006052	2L:22577601-22578273	-	2L:22684869-22685541	-	1	Intronic	-2.097	-1.306
XLOC_006056	2L:22588181-22588959	-	2L:22695449-22696227	-	1	Intronic	-2.008	-1.037
XLOC_006057	2L:22599101-22599846	-	2L:22706369-22707114	-	1	Intronic	-1.185	-0.322
XLOC_006058	2L:22600609-22601453	-	2L:22707877-22708721	-	1	Intronic	-1.455	-0.513
XLOC_006059	2L:22605714-22605955	-	2L:22712982-22713223	-	1	Intronic	-1.444	0.08
XLOC_006060	2L:22606146-22606923	-	2L:22713414-22714191	-	1	Intronic	-0.975	-0.001
XLOC_006061	2L:22607042-22608812	-	2L:22714310-22716080	-	1	Intronic	-0.9	-0.012
XLOC_006062	2L:22608930-22609356	-	2L:22716198-22716624	-	1	Intronic	-2.142	-0.912
XLOC_006063	2L:22610619-22610991	-	2L:22717887-22718259	-	1	Intronic	-1.067	0.218
XLOC_006064	2L:22615624-22615820	-	2L:22722892-22723088	-	1	Intronic	-3.498	-2.473
XLOC_006067	2L:22624070-22624695	-	2L:22731338-22731963	-	1	Intronic	-1.931	-1.255
XLOC_006068	2L:22625013-22625280	-	2L:22732281-22732548	-	1	Intronic	-2.639	-1.898
XLOC_006069	2L:22629381-22631282	-	2L:22736649-22738550	-	1	Intronic	-0.281	0.115
XLOC_006070	2L:22635941-22638031	-	2L:22743209-22745299	-	1	Intronic	-0.247	0.248
XLOC_006072	2L:22645516-22646255	-	2L:22752784-22753523	-	1	Intronic	0.008	0.582
XLOC_006073	2L:22646380-22647528	-	2L:22753648-22754796	-	1	Intronic	0.398	0.978
XLOC_006074	2L:22647653-22647913	-	2L:22754921-22755181	-	1	Intronic	-1.52	-0.413
XLOC_006087	2L:22705670-22736356	-	2L:22812938-22843624	-	2	Intergenic	0.712	0.852
XLOC_006223	2LHet:34411-36334	+	2L:23175900-23177823	+	4	Intergenic	1.521	1.648
XLOC_006224	2LHet:38042-58306	+	2L:23179531-23199795	+	4	Intergenic	-0.763	-0.828
XLOC_006253	2LHet:25786-29448	-	2L:23167275-23170937	-	1	Anti-Sense	1.051	1.321
XLOC_006268	2R:21910-24748	+	2R:4134405-4137243	+	1	Intergenic	-1.329	-1.457
XLOC_006275	2R:50504-52495	+	2R:4162999-4164990	+	1	Intergenic	-4.792	0.329
XLOC_006282	2R:78321-108264	+	2R:4190816-4220759	+	2	Intergenic	-1.485	-1.294
XLOC_006289	2R:148856-164651	+	2R:4261351-4277146	+	3	Intergenic	-1.927	-1.044
XLOC_006311	2R:437156-437575	+	2R:4549651-4550070	+	1	Intronic	0.223	0.552
XLOC_006312	2R:437737-438549	+	2R:4550232-4551044	+	1	Intronic	1.211	1.618
XLOC_006313	2R:438913-439683	+	2R:4551408-4552178	+	1	Intronic	0.888	1.371
XLOC_006314	2R:439790-440137	+	2R:4552285-4552632	+	1	Intronic	-0.101	0.241
XLOC_006315	2R:444877-447537	+	2R:4557372-4560032	+	1	Intronic	0.229	0.653
XLOC_006323	2R:498734-503609	+	2R:4611229-4616104	+	1	Intergenic	-0.783	-0.289
XLOC_006352	2R:637085-637325	+	2R:4749580-4749820	+	1	Intronic	1.803	2.219
XLOC_006353	2R:637380-637922	+	2R:4749875-4750417	+	1	Intronic	1.081	1.427
XLOC_006354	2R:639551-639800	+	2R:4752046-4752295	+	1	Intronic	0.272	0.863
XLOC_006355	2R:639876-640989	+	2R:4752371-4753484	+	1	Intronic	1.132	1.532
XLOC_006356	2R:641143-641361	+	2R:4753638-4753856	+	1	Intronic	1.173	1.634
XLOC_006357	2R:646865-649506	+	2R:4759360-4762001	+	1	Intergenic	-2.304	-2.48
XLOC_006359	2R:667741-674254	+	2R:4780236-4786749	+	5	Anti-Sense	0.675	0.902
XLOC_006363	2R:719398-721185	+	2R:4831893-4833680	+	1	Intergenic	0.558	0.669
XLOC_006364	2R:724194-726460	+	2R:4836689-4838955	+	1	Intergenic	-0.579	-0.739
XLOC_006365	2R:727854-729091	+	2R:4840349-4841586	+	1	Intergenic	-0.876	-1.089
XLOC_006403	2R:1037687-1039214	+	2R:5150182-5151709	+	1	Intronic	1.44	1.929
XLOC_006404	2R:1045948-1049658	+	2R:5158443-5162153	+	1	Intergenic	-1.22	-0.62
XLOC_006405	2R:1048777-1061454	+	2R:5161272-5173949	+	2	Intergenic	-1.599	-1.494
XLOC_006414	2R:1195212-1195641	+	2R:5307707-5308136	+	1	Intronic	2.851	2.971
XLOC_006415	2R:1195965-1196562	+	2R:5308460-5309057	+	1	Intronic	2.015	2.404
XLOC_006416	2R:1204041-1204249	+	2R:5316536-5316744	+	1	Intronic	1.947	2.572
XLOC_006417	2R:1206790-1206914	+	2R:5319285-5319409	+	1	Intronic	-0.59	0.195
XLOC_006418	2R:1208287-1208931	+	2R:5320782-5321426	+	1	Intronic	0.189	0.829
XLOC_006419	2R:1209185-1209802	+	2R:5321680-5322297	+	1	Intronic	0.395	0.973
XLOC_006420	2R:1210936-1211539	+	2R:5323431-5324034	+	1	Intronic	0.614	1.221
XLOC_006421	2R:1212015-1212563	+	2R:5324510-5325058	+	1	Intronic	-0.073	0.71
XLOC_006422	2R:1213007-1213197	+	2R:5325502-5325692	+	1	Intronic	0.989	1.842
XLOC_006436	2R:1308977-1310808	+	2R:5421472-5423303	+	1	Intronic	-0.3	0.007
XLOC_006437	2R:1312317-1312952	+	2R:5424812-5425447	+	1	Intronic	-1.238	-0.391
XLOC_006438	2R:1313961-1315433	+	2R:5426456-5427928	+	1	Intronic	-0.456	0.252
XLOC_006439	2R:1318936-1322551	+	2R:5431431-5435046	+	1	Intronic	-1.096	-0.433
XLOC_006441	2R:1323934-1327038	+	2R:5436429-5439533	+	1	Intronic	-0.891	-0.061
XLOC_006442	2R:1327430-1327695	+	2R:5439925-5440190	+	1	Intronic	-1.215	-0.169
XLOC_006443	2R:1328596-1330039	+	2R:5441091-5442534	+	1	Intronic	-1.763	-0.857
XLOC_006445	2R:1332149-1332757	+	2R:5444644-5445252	+	1	Intronic	-2.743	-1.551
XLOC_006454	2R:1409067-1410004	+	2R:5521562-5522499	+	1	Intronic	-2.69	-0.237
XLOC_006455	2R:1410472-1411899	+	2R:5522967-5524394	+	1	Intronic	-2.32	-0.376
XLOC_006457	2R:1416484-1417098	+	2R:5528979-5529593	+	1	Intronic	-2.62	2.01
XLOC_006458	2R:1418732-1418963	+	2R:5531227-5531458	+	1	Intronic	-4.435	2.054
XLOC_006459	2R:1421814-1422517	+	2R:5534309-5535012	+	1	Intronic	-3.601	1.29
XLOC_006465	2R:1497762-1498062	+	2R:5610257-5610557	+	1	Intronic	2.859	3.466
XLOC_006466	2R:1498184-1498685	+	2R:5610679-5611180	+	1	Intronic	2.461	3.104
XLOC_006488	2R:1698269-1699283	+	2R:5810764-5811778	+	1	Intronic	-3.708	-0.234
XLOC_006489	2R:1720044-1720333	+	2R:5832539-5832828	+	1	Intronic	-4.096	-0.065
XLOC_006490	2R:1720540-1722212	+	2R:5833035-5834707	+	1	Intronic	-2.58	-0.564
XLOC_006491	2R:1722367-1723746	+	2R:5834862-5836241	+	1	Intronic	-2.565	-0.632
XLOC_006522	2R:1872248-1873847	+	2R:5984743-5986342	+	1	Intronic	0.646	1.127
XLOC_006523	2R:1874486-1874960	+	2R:5986981-5987455	+	1	Intronic	0.215	0.723
XLOC_006524	2R:1875107-1877384	+	2R:5987602-5989879	+	1	Intronic	0.794	1.316
XLOC_006525	2R:1877498-1878547	+	2R:5989993-5991042	+	1	Intronic	0.713	1.247
XLOC_006526	2R:1889065-1889485	+	2R:6001560-6001980	+	1	Intronic	0.244	0.713
XLOC_006527	2R:1890685-1890895	+	2R:6003180-6003390	+	1	Intronic	0.212	0.883
XLOC_006528	2R:1891840-1892187	+	2R:6004335-6004682	+	1	Intronic	0.535	0.985
XLOC_006529	2R:1892247-1892574	+	2R:6004742-6005069	+	1	Intronic	0.127	0.734
XLOC_006530	2R:1897017-1897882	+	2R:6009512-6010377	+	1	Intronic	1.207	1.786
XLOC_006549	2R:2123568-2124779	+	2R:6236063-6237274	+	1	Intronic	-0.34	0.028
XLOC_006551	2R:2154491-2156188	+	2R:6266986-6268683	+	2	Intergenic	0.108	-1.521
XLOC_006565	2R:2320664-2338544	+	2R:6433159-6451039	+	4	Intergenic	-0.282	-3.388
XLOC_006567	2R:2411195-2411893	+	2R:6523690-6524388	+	1	Intronic	-2.2	-1.144
XLOC_006568	2R:2417076-2417615	+	2R:6529571-6530110	+	1	Intronic	-2.233	-0.923
XLOC_006570	2R:2443259-2444649	+	2R:6555754-6557144	+	1	Intronic	-1.866	-1.107
XLOC_006571	2R:2444704-2447851	+	2R:6557199-6560346	+	1	Intronic	-1.716	-1.205
XLOC_006583	2R:2492124-2494258	+	2R:6604619-6606753	+	1	Intronic	-1.485	-1.063
XLOC_006584	2R:2494463-2496617	+	2R:6606958-6609112	+	1	Intronic	-1.578	-1.098
XLOC_006590	2R:2550539-2551745	+	2R:6663034-6664240	+	1	Anti-Sense	-0.229	-0.007
XLOC_006591	2R:2553482-2554069	+	2R:6665977-6666564	+	1	Intronic	-0.784	-0.436
XLOC_006599	2R:2637278-2637526	+	2R:6749773-6750021	+	1	Intronic	0.276	0.267
XLOC_006600	2R:2638064-2638281	+	2R:6750559-6750776	+	1	Intronic	0.604	0.736
XLOC_006601	2R:2638770-2638908	+	2R:6751265-6751403	+	1	Intronic	-0.71	-0.757
XLOC_006602	2R:2639737-2640110	+	2R:6752232-6752605	+	1	Intronic	0.092	0.674
XLOC_006663	2R:3277016-3277582	+	2R:7389511-7390077	+	1	Intronic	2.652	2.628
XLOC_006664	2R:3278621-3280960	+	2R:7391116-7393455	+	1	Anti-Sense	-1.26	-1.785
XLOC_006676	2R:3390707-3390986	+	2R:7503202-7503481	+	1	Intronic	1.458	1.697
XLOC_006681	2R:3455927-3456282	+	2R:7568422-7568777	+	1	Intronic	-1.682	-0.617
XLOC_006707	2R:3803235-3803983	+	2R:7915730-7916478	+	1	Anti-Sense	-1.864	0.23
XLOC_006727	2R:3962495-3962800	+	2R:8074990-8075295	+	1	Intronic	0.667	0.351
XLOC_006733	2R:4064587-4065830	+	2R:8177082-8178325	+	1	Intronic	-1.475	-0.688
XLOC_006734	2R:4066440-4067198	+	2R:8178935-8179693	+	1	Intronic	-1.829	-0.821
XLOC_006735	2R:4075208-4075765	+	2R:8187703-8188260	+	1	Intronic	-1.322	0.008
XLOC_006736	2R:4076714-4077656	+	2R:8189209-8190151	+	1	Intronic	-1.247	-0.34
XLOC_006737	2R:4077916-4078691	+	2R:8190411-8191186	+	1	Intronic	-1.298	-0.382
XLOC_006738	2R:4079082-4083889	+	2R:8191577-8196384	+	1	Intronic	-0.964	-0.111
XLOC_006739	2R:4084155-4084960	+	2R:8196650-8197455	+	1	Intronic	-1.576	-0.4
XLOC_006768	2R:4215836-4216900	+	2R:8328331-8329395	+	1	Intronic	-1.23	0.38
XLOC_006769	2R:4219173-4219952	+	2R:8331668-8332447	+	1	Intronic	-1.527	0.393
XLOC_006770	2R:4241017-4241787	+	2R:8353512-8354282	+	1	Intronic	-3.093	-0.651
XLOC_006798	2R:4562381-4562792	+	2R:8674876-8675287	+	1	Intronic	1.673	2.259
XLOC_006809	2R:4626559-4628628	+	2R:8739054-8741123	+	1	Intronic	-0.858	0.578
XLOC_006810	2R:4639383-4639606	+	2R:8751878-8752101	+	1	Intronic	-4.324	-1.199
XLOC_006811	2R:4642671-4643456	+	2R:8755166-8755951	+	1	Intronic	-1.773	-0.017
XLOC_006819	2R:4758529-4759724	+	2R:8871024-8872219	+	1	Intronic	-1.021	0.448
XLOC_006850	2R:5036692-5037191	+	2R:9149187-9149686	+	1	Intronic	1.487	1.854
XLOC_006851	2R:5045249-5046778	+	2R:9157744-9159273	+	1	Anti-Sense	0.345	0.719
XLOC_006890	2R:5346359-5347207	+	2R:9458854-9459702	+	1	Intronic	-2.062	-0.885
XLOC_006891	2R:5347499-5348715	+	2R:9459994-9461210	+	1	Intronic	-1.535	-0.727
XLOC_006892	2R:5348824-5350553	+	2R:9461319-9463048	+	1	Intronic	-2.064	-1.161
XLOC_006894	2R:5354475-5357327	+	2R:9466970-9469822	+	1	Intronic	-1.601	-0.756
XLOC_006913	2R:5646764-5647247	+	2R:9759259-9759742	+	1	Intronic	-0.605	1.201
XLOC_006914	2R:5647606-5647954	+	2R:9760101-9760449	+	1	Intronic	-0.564	1.142
XLOC_006915	2R:5649896-5650227	+	2R:9762391-9762722	+	1	Intronic	-0.333	1.522
XLOC_006947	2R:5976248-5977156	+	2R:10088743-10089651	+	1	Intronic	-1.962	0.053
XLOC_006948	2R:5978317-5979261	+	2R:10090812-10091756	+	1	Intronic	-1.413	0.336
XLOC_006951	2R:5999081-5999678	+	2R:10111576-10112173	+	1	Intronic	1.776	2.795
XLOC_006955	2R:6015284-6015728	+	2R:10127779-10128223	+	1	Intronic	0.275	1.148
XLOC_006956	2R:6016535-6019126	+	2R:10129030-10131621	+	1	Intronic	0.733	1.577
XLOC_006957	2R:6021546-6021934	+	2R:10134041-10134429	+	1	Intronic	0.488	1.378
XLOC_006958	2R:6022078-6022622	+	2R:10134573-10135117	+	1	Intronic	0.235	1.186
XLOC_006959	2R:6023431-6023927	+	2R:10135926-10136422	+	1	Intronic	0.779	1.586
XLOC_006964	2R:6182850-6183167	+	2R:10295345-10295662	+	1	Intronic	-2.669	-0.031
XLOC_006973	2R:6316074-6317160	+	2R:10428569-10429655	+	1	Intergenic	-0.337	-1.28
XLOC_006976	2R:6327146-6329308	+	2R:10439641-10441803	+	1	Intronic	-0.337	0.346
XLOC_006977	2R:6329483-6331695	+	2R:10441978-10444190	+	1	Intronic	-0.959	0.147
XLOC_006978	2R:6331982-6332245	+	2R:10444477-10444740	+	1	Intronic	-0.031	1.363
XLOC_006979	2R:6333249-6335676	+	2R:10445744-10448171	+	1	Intronic	-0.697	0.249
XLOC_006980	2R:6336144-6343432	+	2R:10448639-10455927	+	2	Anti-Sense	-0.19	0.839
XLOC_006981	2R:6347538-6348102	+	2R:10460033-10460597	+	1	Intronic	-1.44	0.312
XLOC_006982	2R:6361472-6361961	+	2R:10473967-10474456	+	1	Intronic	-0.621	0.615
XLOC_006988	2R:6406692-6407247	+	2R:10519187-10519742	+	1	Anti-Sense	-2.816	-0.577
XLOC_006998	2R:6481767-6482733	+	2R:10594262-10595228	+	1	Intronic	-0.014	0.579
XLOC_006999	2R:6482891-6483244	+	2R:10595386-10595739	+	1	Intronic	-0.598	0.205
XLOC_007000	2R:6483510-6483897	+	2R:10596005-10596392	+	1	Intronic	-1.034	-0.287
XLOC_007001	2R:6486936-6487166	+	2R:10599431-10599661	+	1	Intronic	-2.437	-0.987
XLOC_007007	2R:6493525-6493744	+	2R:10606020-10606239	+	1	Intronic	0.787	1.13
XLOC_007008	2R:6493907-6495069	+	2R:10606402-10607564	+	1	Intronic	-0.159	0.46
XLOC_007009	2R:6495530-6495897	+	2R:10608025-10608392	+	1	Intronic	-0.855	-0.213
XLOC_007010	2R:6505701-6506478	+	2R:10618196-10618973	+	1	Intronic	-1.842	-1.451
XLOC_007019	2R:6623843-6624015	+	2R:10736338-10736510	+	1	Intronic	1.91	2.777
XLOC_007034	2R:6776391-6777114	+	2R:10888886-10889609	+	1	Intronic	0.616	0.386
XLOC_007095	2R:7324151-7327299	+	2R:11436646-11439794	+	1	Intronic	0.599	-0.035
XLOC_007130	2R:7553329-7554782	+	2R:11665824-11667277	+	1	Intronic	1.757	2.55
XLOC_007131	2R:7554869-7555800	+	2R:11667364-11668295	+	1	Intronic	1.46	2.293
XLOC_007132	2R:7558692-7559185	+	2R:11671187-11671680	+	1	Intronic	1.419	2.318
XLOC_007226	2R:8325876-8327815	+	2R:12438371-12440310	+	1	Intronic	-0.607	-0.01
XLOC_007231	2R:8363117-8363788	+	2R:12475612-12476283	+	1	Intronic	-1.263	0.051
XLOC_007236	2R:8424138-8427072	+	2R:12536633-12539567	+	1	Intronic	-1.498	-1.221
XLOC_007238	2R:8435993-8439806	+	2R:12548488-12552301	+	1	Intronic	-1.091	-0.958
XLOC_007245	2R:8484382-8484848	+	2R:12596877-12597343	+	1	Intronic	0.852	2.151
XLOC_007246	2R:8485239-8485458	+	2R:12597734-12597953	+	1	Intronic	1.023	2.408
XLOC_007247	2R:8487512-8487771	+	2R:12600007-12600266	+	1	Intronic	0.647	2.089
XLOC_007248	2R:8492044-8492316	+	2R:12604539-12604811	+	1	Intronic	0.02	1.641
XLOC_007249	2R:8493217-8493425	+	2R:12605712-12605920	+	1	Intronic	-2.02	0.415
XLOC_007250	2R:8496015-8496671	+	2R:12608510-12609166	+	1	Intronic	2.079	3.385
XLOC_007252	2R:8500397-8500654	+	2R:12612892-12613149	+	1	Intronic	0.855	1.366
XLOC_007253	2R:8500721-8500996	+	2R:12613216-12613491	+	1	Intronic	0.311	0.946
XLOC_007427	2R:9898828-9901080	+	2R:14011323-14013575	+	1	Intronic	-0.71	-0.299
XLOC_007429	2R:9921813-9923635	+	2R:14034308-14036130	+	1	Intronic	-0.82	-0.035
XLOC_007454	2R:10177176-10178522	+	2R:14289671-14291017	+	1	Intronic	-0.822	0.269
XLOC_007475	2R:10371096-10373749	+	2R:14483591-14486244	+	1	Intronic	1.001	1.075
XLOC_007476	2R:10373815-10376179	+	2R:14486310-14488674	+	1	Intronic	0.785	0.872
XLOC_007477	2R:10379030-10379600	+	2R:14491525-14492095	+	1	Intronic	-0.283	1.561
XLOC_007541	2R:10872600-10874063	+	2R:14985095-14986558	+	1	Intronic	0.929	1.707
XLOC_007550	2R:10901175-10903064	+	2R:15013670-15015559	+	1	Intronic	-3.373	0.135
XLOC_007594	2R:11268391-11268870	+	2R:15380886-15381365	+	1	Anti-Sense	0.83	1.145
XLOC_007602	2R:11307098-11307501	+	2R:15419593-15419996	+	1	Intronic	-1.351	0.378
XLOC_007603	2R:11307637-11308007	+	2R:15420132-15420502	+	1	Intronic	-1.887	-0.206
XLOC_007604	2R:11310777-11311530	+	2R:15423272-15424025	+	1	Anti-Sense	-2.631	-0.682
XLOC_007605	2R:11320268-11321916	+	2R:15432763-15434411	+	1	Intronic	-1.755	-0.121
XLOC_007607	2R:11322266-11327808	+	2R:15434761-15440303	+	1	Intronic	-1.571	-0.063
XLOC_007608	2R:11327897-11336201	+	2R:15440392-15448696	+	1	Intronic	-1.95	-0.393
XLOC_007626	2R:11518292-11523825	+	2R:15630787-15636320	+	1	Intronic	-1.063	-0.118
XLOC_007639	2R:11625071-11632718	+	2R:15737566-15745213	+	1	Intronic	-1.319	-0.496
XLOC_007640	2R:11633066-11634737	+	2R:15745561-15747232	+	1	Intronic	-1.527	-0.76
XLOC_007642	2R:11636975-11638642	+	2R:15749470-15751137	+	1	Intronic	-1.815	-0.841
XLOC_007681	2R:11896162-11896597	+	2R:16008657-16009092	+	1	Intronic	-0.916	0.451
XLOC_007695	2R:11992279-11992535	+	2R:16104774-16105030	+	1	Intronic	4.029	3.996
XLOC_007699	2R:12019417-12019813	+	2R:16131912-16132308	+	1	Intronic	0.68	1.573
XLOC_007700	2R:12020141-12020333	+	2R:16132636-16132828	+	1	Intronic	2.423	3.26
XLOC_007701	2R:12020596-12020926	+	2R:16133091-16133421	+	1	Intronic	2.571	3.417
XLOC_007702	2R:12021189-12023531	+	2R:16133684-16136026	+	1	Intronic	1.567	2.407
XLOC_007706	2R:12044142-12044520	+	2R:16156637-16157015	+	1	Intronic	-0.251	0.531
XLOC_007707	2R:12047102-12047724	+	2R:16159597-16160219	+	1	Intronic	-0.949	-0.298
XLOC_007750	2R:12413494-12414388	+	2R:16525989-16526883	+	1	Intronic	-1.777	-1.579
XLOC_007752	2R:12415324-12416013	+	2R:16527819-16528508	+	1	Intronic	-0.394	-0.22
XLOC_007759	2R:12470606-12471537	+	2R:16583101-16584032	+	1	Anti-Sense	-0.765	-0.925
XLOC_007763	2R:12507211-12507864	+	2R:16619706-16620359	+	1	Intronic	-0.36	0.875
XLOC_007778	2R:12632066-12635745	+	2R:16744561-16748240	+	3	Anti-Sense	-1.762	-1.256
XLOC_007816	2R:12874568-12874693	+	2R:16987063-16987188	+	1	Intronic	-2.557	1.129
XLOC_007817	2R:12874870-12875515	+	2R:16987365-16988010	+	1	Intronic	-1.537	0.568
XLOC_007818	2R:12877036-12877687	+	2R:16989531-16990182	+	1	Intronic	-1.533	0.558
XLOC_007820	2R:12879694-12880049	+	2R:16992189-16992544	+	1	Intronic	-2.084	0.601
XLOC_007821	2R:12880281-12881041	+	2R:16992776-16993536	+	1	Intronic	-1.496	0.5
XLOC_007825	2R:12917407-12918128	+	2R:17029902-17030623	+	1	Intronic	0.158	0.74
XLOC_007826	2R:12920401-12921324	+	2R:17032896-17033819	+	1	Anti-Sense	-0.015	0.704
XLOC_007848	2R:13158381-13158703	+	2R:17270876-17271198	+	1	Intronic	0.245	4.331
XLOC_007849	2R:13243042-13245819	+	2R:17355537-17358314	+	1	Intronic	-0.983	0.188
XLOC_007850	2R:13258662-13259229	+	2R:17371157-17371724	+	1	Intronic	-1.932	-0.159
XLOC_007857	2R:13324303-13324927	+	2R:17436798-17437422	+	1	Intronic	-2.144	-1.127
XLOC_007863	2R:13346640-13347196	+	2R:17459135-17459691	+	1	Intronic	1.054	1.255
XLOC_007864	2R:13347284-13347644	+	2R:17459779-17460139	+	1	Intronic	1.279	1.443
XLOC_007902	2R:13716483-13717880	+	2R:17828978-17830375	+	1	Intronic	-1.715	-0.331
XLOC_007907	2R:13739016-13739259	+	2R:17851511-17851754	+	1	Intronic	-1.501	-0.352
XLOC_007924	2R:13937210-13939567	+	2R:18049705-18052062	+	3	Anti-Sense	-1.974	-0.628
XLOC_007958	2R:14309261-14309588	+	2R:18421756-18422083	+	1	Intronic	1.679	2.09
XLOC_007959	2R:14312181-14312370	+	2R:18424676-18424865	+	1	Intronic	1.989	2.476
XLOC_007972	2R:14407071-14407832	+	2R:18519566-18520327	+	1	Intronic	-1.363	-0.355
XLOC_007997	2R:14708387-14708533	+	2R:18820882-18821028	+	1	Intronic	0.668	0.483
XLOC_008006	2R:14767701-14777725	+	2R:18880196-18890220	+	1	Intronic	-2.109	-0.78
XLOC_008008	2R:14801077-14803745	+	2R:18913572-18916240	+	1	Intronic	-2.138	-0.646
XLOC_008012	2R:14826609-14828154	+	2R:18939104-18940649	+	1	Intronic	-2.229	-0.764
XLOC_008013	2R:14828682-14829948	+	2R:18941177-18942443	+	1	Intronic	-2.164	-0.101
XLOC_008021	2R:14880438-14880659	+	2R:18992933-18993154	+	1	Intronic	-2.354	0.209
XLOC_008023	2R:14887448-14887663	+	2R:18999943-19000158	+	1	Intronic	-2.478	0.184
XLOC_008024	2R:14889350-14889922	+	2R:19001845-19002417	+	1	Intronic	-2.461	-0.464
XLOC_008025	2R:14891598-14892109	+	2R:19004093-19004604	+	1	Intronic	0.143	1.733
XLOC_008026	2R:14892549-14892775	+	2R:19005044-19005270	+	1	Intronic	-4.141	-1.143
XLOC_008041	2R:15025792-15026644	+	2R:19138287-19139139	+	1	Intronic	0.807	0.711
XLOC_008046	2R:15040449-15040698	+	2R:19152944-19153193	+	1	Intronic	-2.798	-2.868
XLOC_008048	2R:15056179-15056703	+	2R:19168674-19169198	+	1	Intronic	-2.205	-0.402
XLOC_008049	2R:15056773-15057591	+	2R:19169268-19170086	+	1	Intronic	-0.941	0.153
XLOC_008050	2R:15060428-15060932	+	2R:19172923-19173427	+	1	Intronic	2.331	3.514
XLOC_008051	2R:15061909-15062065	+	2R:19174404-19174560	+	1	Intronic	0.184	1.726
XLOC_008052	2R:15063064-15063449	+	2R:19175559-19175944	+	1	Intronic	-0.483	0.692
XLOC_008053	2R:15065103-15065320	+	2R:19177598-19177815	+	1	Intronic	-0.232	1.295
XLOC_008055	2R:15069993-15070668	+	2R:19182488-19183163	+	1	Intronic	-0.308	0.483
XLOC_008056	2R:15070793-15071810	+	2R:19183288-19184305	+	1	Intronic	0.037	0.817
XLOC_008057	2R:15071970-15075039	+	2R:19184465-19187534	+	1	Intronic	-0.217	0.516
XLOC_008058	2R:15075477-15076228	+	2R:19187972-19188723	+	1	Intronic	-0.06	0.695
XLOC_008059	2R:15076376-15078126	+	2R:19188871-19190621	+	1	Intronic	-0.438	0.386
XLOC_008060	2R:15078352-15078623	+	2R:19190847-19191118	+	1	Intronic	-0.972	0.433
XLOC_008061	2R:15079016-15079206	+	2R:19191511-19191701	+	1	Intronic	-1.706	-0.346
XLOC_008062	2R:15081765-15082756	+	2R:19194260-19195251	+	1	Intronic	-1.103	-0.036
XLOC_008063	2R:15082884-15083797	+	2R:19195379-19196292	+	1	Intronic	-0.853	-0.044
XLOC_008064	2R:15084273-15084775	+	2R:19196768-19197270	+	1	Intronic	-1.335	-0.142
XLOC_008065	2R:15085028-15088559	+	2R:19197523-19201054	+	1	Intronic	-0.026	0.729
XLOC_008066	2R:15089032-15089906	+	2R:19201527-19202401	+	1	Intronic	-0.493	0.317
XLOC_008067	2R:15090840-15091156	+	2R:19203335-19203651	+	1	Intronic	-0.592	0.601
XLOC_008068	2R:15091579-15092115	+	2R:19204074-19204610	+	1	Intronic	-0.85	-0.003
XLOC_008069	2R:15092228-15092475	+	2R:19204723-19204970	+	1	Intronic	-1.912	-0.375
XLOC_008070	2R:15092788-15092968	+	2R:19205283-19205463	+	1	Intronic	-0.877	0.498
XLOC_008071	2R:15099794-15103449	+	2R:19212289-19215944	+	1	Intronic	-0.586	0.102
XLOC_008072	2R:15103559-15103864	+	2R:19216054-19216359	+	1	Intronic	-2.515	-0.944
XLOC_008073	2R:15104961-15105191	+	2R:19217456-19217686	+	1	Intronic	-2.029	-0.955
XLOC_008075	2R:15117608-15117968	+	2R:19230103-19230463	+	1	Intronic	-0.602	0.145
XLOC_008076	2R:15118114-15118993	+	2R:19230609-19231488	+	1	Intronic	-0.257	0.398
XLOC_008077	2R:15120342-15120715	+	2R:19232837-19233210	+	1	Intronic	-1.339	-0.302
XLOC_008078	2R:15121013-15121664	+	2R:19233508-19234159	+	1	Intronic	-1.437	-0.672
XLOC_008079	2R:15121838-15122619	+	2R:19234333-19235114	+	1	Intronic	-1.674	-0.859
XLOC_008080	2R:15124964-15125242	+	2R:19237459-19237737	+	1	Intronic	-1.141	0.086
XLOC_008081	2R:15125415-15125620	+	2R:19237910-19238115	+	1	Intronic	-0.808	0.54
XLOC_008092	2R:15181180-15181664	+	2R:19293675-19294159	+	1	Intronic	-1.064	-0.241
XLOC_008093	2R:15181870-15182673	+	2R:19294365-19295168	+	1	Intronic	-0.459	0.153
XLOC_008094	2R:15183039-15183794	+	2R:19295534-19296289	+	1	Intronic	-1.511	-0.723
XLOC_008095	2R:15183893-15184624	+	2R:19296388-19297119	+	1	Intronic	-1.148	-0.514
XLOC_008106	2R:15283797-15284432	+	2R:19396292-19396927	+	1	Anti-Sense	-0.683	0.002
XLOC_008115	2R:15344811-15344952	+	2R:19457306-19457447	+	1	Intronic	1.942	2.406
XLOC_008116	2R:15359426-15360267	+	2R:19471921-19472762	+	1	Intronic	1.758	2.544
XLOC_008117	2R:15360687-15360944	+	2R:19473182-19473439	+	1	Intronic	1.867	2.283
XLOC_008118	2R:15366565-15367430	+	2R:19479060-19479925	+	1	Intronic	1.357	2.091
XLOC_008119	2R:15367486-15368324	+	2R:19479981-19480819	+	1	Intronic	1.184	1.927
XLOC_008120	2R:15370139-15370456	+	2R:19482634-19482951	+	1	Intronic	1.835	2.689
XLOC_008289	2R:16477301-16478188	+	2R:20589796-20590683	+	1	Intronic	0.229	0.554
XLOC_008290	2R:16478258-16478581	+	2R:20590753-20591076	+	1	Intronic	0.127	0.547
XLOC_008291	2R:16478636-16479716	+	2R:20591131-20592211	+	1	Intronic	-0.183	0.113
XLOC_008292	2R:16479773-16480071	+	2R:20592268-20592566	+	1	Intronic	-1.725	-1.277
XLOC_008293	2R:16486345-16487769	+	2R:20598840-20600264	+	1	Intronic	-0.994	-0.255
XLOC_008294	2R:16488530-16489014	+	2R:20601025-20601509	+	1	Intronic	-1.216	-0.447
XLOC_008295	2R:16489487-16489890	+	2R:20601982-20602385	+	1	Intronic	-1.173	-0.18
XLOC_008358	2R:16964645-16965084	+	2R:21077140-21077579	+	1	Intronic	1.778	2.313
XLOC_008359	2R:16965353-16966114	+	2R:21077848-21078609	+	1	Intronic	1.591	2.11
XLOC_008360	2R:16966353-16967476	+	2R:21078848-21079971	+	1	Intronic	1.326	2.126
XLOC_008361	2R:16974918-16975285	+	2R:21087413-21087780	+	1	Intronic	3.651	4.121
XLOC_008367	2R:17045141-17046556	+	2R:21157636-21159051	+	1	Anti-Sense	-1.739	-1.144
XLOC_008372	2R:17067150-17067435	+	2R:21179645-21179930	+	1	Intronic	0.888	1.752
XLOC_008373	2R:17068252-17068717	+	2R:21180747-21181212	+	1	Intronic	-0.667	0.4
XLOC_008384	2R:17146065-17146813	+	2R:21258560-21259308	+	1	Intronic	-3.339	-0.617
XLOC_008385	2R:17146869-17148731	+	2R:21259364-21261226	+	1	Intronic	-2.421	-0.618
XLOC_008388	2R:17152366-17154431	+	2R:21264861-21266926	+	1	Anti-Sense	-2.236	-0.293
XLOC_008390	2R:17159795-17162696	+	2R:21272290-21275191	+	1	Intronic	-1.806	-0.259
XLOC_008392	2R:17164121-17165865	+	2R:21276616-21278360	+	1	Intronic	-0.496	1.027
XLOC_008422	2R:17400321-17400874	+	2R:21512816-21513369	+	1	Intronic	-1.62	-0.016
XLOC_008423	2R:17413826-17415150	+	2R:21526321-21527645	+	1	Intronic	-0.726	-0.442
XLOC_008424	2R:17415411-17418741	+	2R:21527906-21531236	+	1	Intronic	-0.636	-0.256
XLOC_008425	2R:17439776-17440349	+	2R:21552271-21552844	+	1	Intronic	-1.092	-0.3
XLOC_008426	2R:17441356-17441937	+	2R:21553851-21554432	+	1	Intronic	-1.884	-0.956
XLOC_008436	2R:17517563-17517967	+	2R:21630058-21630462	+	1	Intronic	3.175	2.522
XLOC_008439	2R:17535472-17537323	+	2R:21647967-21649818	+	1	Intronic	0.692	1.569
XLOC_008440	2R:17538321-17538925	+	2R:21650816-21651420	+	1	Anti-Sense	0.375	1.251
XLOC_008441	2R:17539261-17539931	+	2R:21651756-21652426	+	1	Anti-Sense	0.138	1.158
XLOC_008487	2R:17953111-17953487	+	2R:22065606-22065982	+	1	Intronic	-0.74	0.512
XLOC_008510	2R:18135395-18136527	+	2R:22247890-22249022	+	1	Intronic	-0.957	0.109
XLOC_008511	2R:18136787-18138978	+	2R:22249282-22251473	+	1	Intronic	-0.869	0.117
XLOC_008512	2R:18139055-18139590	+	2R:22251550-22252085	+	1	Intronic	-1.408	-0.082
XLOC_008513	2R:18140360-18140887	+	2R:22252855-22253382	+	1	Intronic	-1.121	0.21
XLOC_008514	2R:18143435-18144172	+	2R:22255930-22256667	+	1	Intronic	-1.064	0.152
XLOC_008515	2R:18151327-18151883	+	2R:22263822-22264378	+	1	Intronic	-1.254	-0.023
XLOC_008516	2R:18153764-18154333	+	2R:22266259-22266828	+	1	Intronic	-1.613	-0.197
XLOC_008517	2R:18154984-18155465	+	2R:22267479-22267960	+	1	Intronic	-1.545	-0.176
XLOC_008523	2R:18207808-18207977	+	2R:22320303-22320472	+	1	Anti-Sense	2.257	2.473
XLOC_008579	2R:18790254-18791449	+	2R:22902731-22903926	+	1	Intronic	-1.684	-0.958
XLOC_008603	2R:18955981-18956313	+	2R:23068458-23068790	+	1	Intronic	0.752	1.35
XLOC_008661	2R:19469325-19470542	+	2R:23581802-23583019	+	1	Intronic	-0.067	0.06
XLOC_008662	2R:19472421-19474846	+	2R:23584898-23587323	+	1	Intronic	-0.303	-0.232
XLOC_008669	2R:19525806-19526838	+	2R:23638283-23639315	+	1	Anti-Sense	-1.885	-0.482
XLOC_008670	2R:19531519-19532101	+	2R:23643996-23644578	+	1	Intronic	-2.398	-0.532
XLOC_008672	2R:19535358-19536326	+	2R:23647835-23648803	+	1	Intronic	-2.287	-0.646
XLOC_008673	2R:19536445-19538195	+	2R:23648922-23650672	+	1	Intronic	-2.152	-0.903
XLOC_008674	2R:19538612-19538927	+	2R:23651089-23651404	+	1	Intronic	-1.789	-0.191
XLOC_008679	2R:19602558-19603041	+	2R:23715035-23715518	+	1	Intronic	1.718	1.966
XLOC_008680	2R:19603282-19603486	+	2R:23715759-23715963	+	1	Intronic	1.819	2.06
XLOC_008681	2R:19603873-19604212	+	2R:23716350-23716689	+	1	Intronic	1.764	2.012
XLOC_008682	2R:19604341-19604996	+	2R:23716818-23717473	+	1	Intronic	1.366	1.678
XLOC_008683	2R:19607578-19607908	+	2R:23720055-23720385	+	1	Anti-Sense	0.974	1.406
XLOC_008684	2R:19610445-19611611	+	2R:23722922-23724088	+	1	Intronic	0.791	1.198
XLOC_008685	2R:19611774-19614662	+	2R:23724251-23727139	+	1	Intronic	0.322	0.71
XLOC_008686	2R:19616861-19618377	+	2R:23729338-23730854	+	1	Intronic	0.942	1.244
XLOC_008705	2R:19811657-19811906	+	2R:23924134-23924383	+	1	Intronic	-0.404	1.425
XLOC_008723	2R:19957766-19958290	+	2R:24070243-24070767	+	1	Intronic	2.657	3.067
XLOC_008729	2R:20027409-20029630	+	2R:24139886-24142107	+	1	Intronic	1.566	2.438
XLOC_008730	2R:20029760-20031131	+	2R:24142237-24143608	+	1	Intronic	1.288	2.042
XLOC_008731	2R:20031311-20034140	+	2R:24143788-24146617	+	1	Intronic	1.041	1.818
XLOC_008732	2R:20042843-20043292	+	2R:24155320-24155769	+	1	Intronic	0.864	2.26
XLOC_008735	2R:20051265-20052132	+	2R:24163742-24164609	+	1	Intronic	-1.714	-0.289
XLOC_008736	2R:20052686-20053657	+	2R:24165163-24166134	+	1	Intronic	-1.79	-0.294
XLOC_008738	2R:20074409-20074908	+	2R:24186886-24187385	+	1	Intronic	-0.343	0.531
XLOC_008785	2R:20431640-20432512	+	2R:24544117-24544989	+	1	Intronic	-1.477	0.08
XLOC_008786	2R:20433526-20435199	+	2R:24546003-24547676	+	1	Intronic	-1.465	-0.055
XLOC_008791	2R:20476403-20476842	+	2R:24588880-24589319	+	1	Intronic	-0.713	0.632
XLOC_008792	2R:20476949-20479446	+	2R:24589426-24591923	+	1	Intronic	-1.149	0.044
XLOC_008793	2R:20480850-20482135	+	2R:24593327-24594612	+	1	Intronic	-1.121	0.147
XLOC_008794	2R:20482251-20482954	+	2R:24594728-24595431	+	1	Intronic	-1.242	0.209
XLOC_008866	2R:126682-127353	-	2R:4239177-4239848	-	1	Intronic	1.615	1.936
XLOC_008874	2R:227624-231143	-	2R:4340119-4343638	-	1	Intronic	-1.064	-0.365
XLOC_008875	2R:231576-232364	-	2R:4344071-4344859	-	1	Intronic	-1.179	-0.278
XLOC_008876	2R:232467-233392	-	2R:4344962-4345887	-	1	Intronic	-1.487	-0.774
XLOC_008877	2R:235236-235933	-	2R:4347731-4348428	-	1	Intronic	-1.029	-0.141
XLOC_008878	2R:237311-237997	-	2R:4349806-4350492	-	1	Intronic	-0.086	0.707
XLOC_008879	2R:241163-241420	-	2R:4353658-4353915	-	1	Intronic	-2.053	-0.471
XLOC_008880	2R:241740-242110	-	2R:4354235-4354605	-	1	Intronic	-1.507	-0.202
XLOC_008881	2R:249434-250706	-	2R:4361929-4363201	-	1	Intronic	-0.897	-0.039
XLOC_008882	2R:250869-251402	-	2R:4363364-4363897	-	1	Intronic	-0.594	0.518
XLOC_008883	2R:261997-262566	-	2R:4374492-4375061	-	1	Intronic	0.065	0.993
XLOC_008884	2R:262676-264145	-	2R:4375171-4376640	-	1	Intronic	0.454	1.28
XLOC_008885	2R:264528-264755	-	2R:4377023-4377250	-	1	Intronic	0.052	1.227
XLOC_008886	2R:264842-265269	-	2R:4377337-4377764	-	1	Intronic	0.627	1.488
XLOC_008887	2R:265407-265845	-	2R:4377902-4378340	-	1	Intronic	0.682	1.56
XLOC_008888	2R:283942-284201	-	2R:4396437-4396696	-	1	Intronic	0.152	1.134
XLOC_008889	2R:294091-294825	-	2R:4406586-4407320	-	1	Intronic	0.801	1.659
XLOC_008890	2R:295766-295981	-	2R:4408261-4408476	-	1	Intronic	0.666	1.355
XLOC_008891	2R:312696-313553	-	2R:4425191-4426048	-	1	Intronic	0.598	1.241
XLOC_008892	2R:313627-314444	-	2R:4426122-4426939	-	1	Intronic	0.908	1.651
XLOC_008893	2R:318603-319122	-	2R:4431098-4431617	-	1	Intronic	0.492	1.187
XLOC_008894	2R:328527-328874	-	2R:4441022-4441369	-	1	Intronic	-0.561	0.13
XLOC_008895	2R:335118-335502	-	2R:4447613-4447997	-	1	Intronic	1.113	1.582
XLOC_008896	2R:336246-337425	-	2R:4448741-4449920	-	1	Intronic	1.063	1.516
XLOC_008927	2R:563804-565520	-	2R:4676299-4678015	-	4	Intergenic	-6.547	0.62
XLOC_008932	2R:582208-582551	-	2R:4694703-4695046	-	1	Intronic	0.86	1.265
XLOC_008933	2R:589326-590713	-	2R:4701821-4703208	-	1	Intronic	0.05	3.521
XLOC_008934	2R:590790-591119	-	2R:4703285-4703614	-	1	Intronic	-0.391	0.3
XLOC_008935	2R:591325-592847	-	2R:4703820-4705342	-	1	Intronic	0.237	0.813
XLOC_008936	2R:593289-593532	-	2R:4705784-4706027	-	1	Intronic	-0.247	0.38
XLOC_008937	2R:593586-594273	-	2R:4706081-4706768	-	1	Intronic	0.487	1.1
XLOC_008938	2R:594940-595298	-	2R:4707435-4707793	-	1	Intronic	0.096	0.781
XLOC_008939	2R:595938-596316	-	2R:4708433-4708811	-	1	Intronic	0.73	1.055
XLOC_008940	2R:596808-597098	-	2R:4709303-4709593	-	1	Intronic	-0.173	0.571
XLOC_008941	2R:598622-599243	-	2R:4711117-4711738	-	1	Intronic	0.733	1.313
XLOC_008942	2R:602367-602796	-	2R:4714862-4715291	-	1	Intronic	0.046	0.706
XLOC_008943	2R:603009-604351	-	2R:4715504-4716846	-	1	Intronic	0.273	0.818
XLOC_008944	2R:606064-606336	-	2R:4718559-4718831	-	1	Intronic	-0.617	0.28
XLOC_008945	2R:606407-607231	-	2R:4718902-4719726	-	1	Intronic	0.477	0.921
XLOC_008946	2R:612866-613071	-	2R:4725361-4725566	-	1	Intronic	-0.422	0.037
XLOC_008960	2R:707548-709348	-	2R:4820043-4821843	-	1	Intronic	-0.014	0.233
XLOC_008994	2R:982775-985606	-	2R:5095270-5098101	-	2	Intergenic	-3.407	2.898
XLOC_009000	2R:1011957-1012890	-	2R:5124452-5125385	-	1	Intronic	0.139	0.753
XLOC_009001	2R:1013046-1013632	-	2R:5125541-5126127	-	1	Intronic	-0.361	0.377
XLOC_009002	2R:1014028-1014637	-	2R:5126523-5127132	-	1	Intronic	-0.204	0.502
XLOC_009003	2R:1014709-1015730	-	2R:5127204-5128225	-	1	Anti-Sense	1.145	1.459
XLOC_009009	2R:1128580-1129032	-	2R:5241075-5241527	-	1	Intronic	1.542	1.803
XLOC_009031	2R:1264474-1301375	-	2R:5376969-5413870	-	5	Anti-Sense	-0.031	-2.046
XLOC_009034	2R:1297541-1298623	-	2R:5410036-5411118	-	1	Intergenic	-0.828	-2.46
XLOC_009045	2R:1367479-1367972	-	2R:5479974-5480467	-	1	Intronic	-2.216	0.744
XLOC_009046	2R:1391842-1392921	-	2R:5504337-5505416	-	1	Intronic	-0.722	0.838
XLOC_009058	2R:1490411-1491029	-	2R:5602906-5603524	-	1	Intergenic	-2.019	-1.598
XLOC_009071	2R:1605320-1607296	-	2R:5717815-5719791	-	1	Intronic	-0.055	0.647
XLOC_009072	2R:1607439-1608155	-	2R:5719934-5720650	-	1	Intronic	-1.157	-0.177
XLOC_009073	2R:1608295-1609780	-	2R:5720790-5722275	-	1	Intronic	-0.501	0.104
XLOC_009114	2R:1982628-1984271	-	2R:6095123-6096766	-	1	Intronic	-1.338	-0.75
XLOC_009115	2R:2005986-2010386	-	2R:6118481-6122881	-	1	Intronic	-0.85	-0.392
XLOC_009120	2R:2098433-2099098	-	2R:6210928-6211593	-	1	Intronic	0.275	1.113
XLOC_009134	2R:2212710-2214555	-	2R:6325205-6327050	-	1	Intergenic	-0.561	-2.823
XLOC_009136	2R:2227298-2228890	-	2R:6339793-6341385	-	1	Intergenic	-2.223	-0.751
XLOC_009141	2R:2315111-2315484	-	2R:6427606-6427979	-	1	Intergenic	-1.947	-4.235
XLOC_009142	2R:2320662-2338447	-	2R:6433157-6450942	-	5	Intergenic	-0.031	-0.483
XLOC_009143	2R:2327425-2327653	-	2R:6439920-6440148	-	1	Intergenic	-1.282	-3.91
XLOC_009165	2R:2589448-2589874	-	2R:6701943-6702369	-	1	Intronic	-1.271	0.012
XLOC_009166	2R:2592116-2592713	-	2R:6704611-6705208	-	1	Intronic	0.037	1.016
XLOC_009170	2R:2611528-2612072	-	2R:6724023-6724567	-	1	Intronic	1.761	2.72
XLOC_009171	2R:2612322-2612757	-	2R:6724817-6725252	-	1	Intronic	1.68	2.736
XLOC_009172	2R:2616603-2617173	-	2R:6729098-6729668	-	1	Intronic	0.079	1.297
XLOC_009173	2R:2617263-2617576	-	2R:6729758-6730071	-	1	Intronic	0.445	1.841
XLOC_009174	2R:2620771-2621069	-	2R:6733266-6733564	-	1	Intronic	1.045	2.348
XLOC_009175	2R:2626423-2626801	-	2R:6738918-6739296	-	1	Intronic	-1.856	-0.207
XLOC_009194	2R:2751077-2751377	-	2R:6863572-6863872	-	1	Intronic	0.162	0.587
XLOC_009195	2R:2755987-2756962	-	2R:6868482-6869457	-	1	Intronic	-1.867	-1.208
XLOC_009196	2R:2757248-2757852	-	2R:6869743-6870347	-	1	Intronic	-0.664	-0.248
XLOC_009197	2R:2757945-2758299	-	2R:6870440-6870794	-	1	Intronic	-0.607	0.142
XLOC_009198	2R:2758442-2759764	-	2R:6870937-6872259	-	1	Intronic	0.777	0.981
XLOC_009203	2R:2823855-2825857	-	2R:6936350-6938352	-	1	Intronic	-1.03	-0.348
XLOC_009204	2R:2826038-2826473	-	2R:6938533-6938968	-	1	Intronic	-1.237	-0.325
XLOC_009205	2R:2828007-2828599	-	2R:6940502-6941094	-	1	Intronic	-2.2	-1.248
XLOC_009249	2R:3355348-3355926	-	2R:7467843-7468421	-	1	Intronic	2.135	3.316
XLOC_009250	2R:3356043-3356613	-	2R:7468538-7469108	-	1	Intronic	2.63	3.93
XLOC_009255	2R:3415513-3416325	-	2R:7528008-7528820	-	1	Intronic	2.258	2.975
XLOC_009262	2R:3485245-3485563	-	2R:7597740-7598058	-	1	Intronic	-2.801	-0.819
XLOC_009263	2R:3485871-3489932	-	2R:7598366-7602427	-	1	Intronic	-0.857	0.18
XLOC_009264	2R:3490206-3490606	-	2R:7602701-7603101	-	1	Intronic	-1.932	0.014
XLOC_009274	2R:3573573-3574016	-	2R:7686068-7686511	-	1	Intronic	-1.54	-0.607
XLOC_009275	2R:3574577-3575623	-	2R:7687072-7688118	-	1	Intronic	0.058	0.545
XLOC_009276	2R:3577693-3577963	-	2R:7690188-7690458	-	1	Intronic	-2.67	-1.384
XLOC_009277	2R:3581317-3581537	-	2R:7693812-7694032	-	1	Intronic	-3.117	-1.704
XLOC_009281	2R:3607654-3608039	-	2R:7720149-7720534	-	1	Intronic	0.414	1.629
XLOC_009282	2R:3614650-3614874	-	2R:7727145-7727369	-	1	Intronic	0.763	1.481
XLOC_009283	2R:3615064-3615438	-	2R:7727559-7727933	-	1	Intronic	-0.18	1.085
XLOC_009285	2R:3640715-3641029	-	2R:7753210-7753524	-	1	Intronic	2.519	3.431
XLOC_009286	2R:3655858-3656088	-	2R:7768353-7768583	-	1	Intronic	1.503	2.102
XLOC_009287	2R:3658136-3658433	-	2R:7770631-7770928	-	1	Intronic	1.627	2.095
XLOC_009288	2R:3658565-3658861	-	2R:7771060-7771356	-	1	Intronic	1.352	1.985
XLOC_009295	2R:3744679-3746667	-	2R:7857174-7859162	-	1	Intronic	-2.42	-0.663
XLOC_009300	2R:3766705-3769304	-	2R:7879200-7881799	-	1	Intronic	-2.473	-0.582
XLOC_009309	2R:3872219-3872343	-	2R:7984714-7984838	-	1	Intronic	1.988	3.068
XLOC_009310	2R:3872963-3873097	-	2R:7985458-7985592	-	1	Intronic	2.944	4.02
XLOC_009311	2R:3873288-3874453	-	2R:7985783-7986948	-	1	Intronic	2.739	3.737
XLOC_009374	2R:4557329-4559724	-	2R:8669824-8672219	-	1	Anti-Sense	-1.626	-0.834
XLOC_009384	2R:4619504-4619651	-	2R:8731999-8732146	-	1	Intronic	-0.038	1.433
XLOC_009385	2R:4620399-4620797	-	2R:8732894-8733292	-	1	Intronic	0.668	1.413
XLOC_009422	2R:4979551-4979918	-	2R:9092046-9092413	-	1	Intronic	0.859	1.11
XLOC_009426	2R:5016173-5018661	-	2R:9128668-9131156	-	1	Intronic	0.697	1.057
XLOC_009432	2R:5064374-5064623	-	2R:9176869-9177118	-	1	Intronic	-0.713	-0.682
XLOC_009434	2R:5069814-5070415	-	2R:9182309-9182910	-	1	Intronic	-1.356	-1.034
XLOC_009436	2R:5075824-5076101	-	2R:9188319-9188596	-	1	Intronic	0.844	1.448
XLOC_009451	2R:5118188-5118593	-	2R:9230683-9231088	-	1	Intronic	-2.593	0.459
XLOC_009452	2R:5119651-5119990	-	2R:9232146-9232485	-	1	Intronic	-1.27	0.723
XLOC_009453	2R:5120277-5120877	-	2R:9232772-9233372	-	1	Intronic	-2.74	-0.289
XLOC_009454	2R:5121017-5121521	-	2R:9233512-9234016	-	1	Intronic	-2.012	0.262
XLOC_009456	2R:5132093-5133552	-	2R:9244588-9246047	-	1	Intronic	-2.441	-0.681
XLOC_009460	2R:5166563-5167013	-	2R:9279058-9279508	-	1	Intronic	-1.797	-0.554
XLOC_009461	2R:5167189-5167689	-	2R:9279684-9280184	-	1	Intronic	-1.664	-0.457
XLOC_009462	2R:5168590-5169170	-	2R:9281085-9281665	-	1	Intronic	-1.363	-0.317
XLOC_009463	2R:5169282-5170339	-	2R:9281777-9282834	-	1	Intronic	-0.461	0.272
XLOC_009464	2R:5170532-5171066	-	2R:9283027-9283561	-	1	Intronic	-0.192	0.488
XLOC_009465	2R:5171635-5172461	-	2R:9284130-9284956	-	1	Anti-Sense	2.623	2.688
XLOC_009468	2R:5193890-5194503	-	2R:9306385-9306998	-	1	Intronic	0.711	1.275
XLOC_009470	2R:5216009-5220999	-	2R:9328504-9333494	-	1	Intronic	-1.986	-0.401
XLOC_009478	2R:5324640-5324915	-	2R:9437135-9437410	-	1	Intronic	1.861	2.276
XLOC_009479	2R:5325309-5325690	-	2R:9437804-9438185	-	1	Intronic	1.651	2.117
XLOC_009480	2R:5325814-5326117	-	2R:9438309-9438612	-	1	Intronic	1.374	1.768
XLOC_009481	2R:5326289-5326830	-	2R:9438784-9439325	-	1	Intronic	1.764	2.222
XLOC_009482	2R:5326928-5327983	-	2R:9439423-9440478	-	1	Intronic	1.891	2.267
XLOC_009505	2R:5503253-5505498	-	2R:9615748-9617993	-	1	Intronic	-1.585	-0.822
XLOC_009506	2R:5515079-5515385	-	2R:9627574-9627880	-	1	Intronic	-3.242	-1.976
XLOC_009507	2R:5536143-5537124	-	2R:9648638-9649619	-	1	Intronic	-1.72	-0.947
XLOC_009508	2R:5547783-5548626	-	2R:9660278-9661121	-	1	Intronic	-1.157	-2.078
XLOC_009509	2R:5549858-5550881	-	2R:9662353-9663376	-	1	Intronic	-1.164	-1.898
XLOC_009514	2R:5612786-5612910	-	2R:9725281-9725405	-	1	Intronic	-3.835	-0.983
XLOC_009515	2R:5613712-5613829	-	2R:9726207-9726324	-	1	Intronic	-2.529	0.683
XLOC_009516	2R:5621753-5623091	-	2R:9734248-9735586	-	1	Intronic	-0.428	0.724
XLOC_009517	2R:5623331-5623605	-	2R:9735826-9736100	-	1	Intronic	-0.097	1.369
XLOC_009518	2R:5623706-5624002	-	2R:9736201-9736497	-	1	Intronic	-0.924	0.764
XLOC_009519	2R:5624113-5625385	-	2R:9736608-9737880	-	1	Intronic	0.202	1.377
XLOC_009527	2R:5700958-5701310	-	2R:9813453-9813805	-	1	Intronic	1.307	2.597
XLOC_009530	2R:5744382-5744706	-	2R:9856877-9857201	-	1	Intronic	1.087	1.911
XLOC_009531	2R:5744879-5746203	-	2R:9857374-9858698	-	1	Intronic	1.125	1.88
XLOC_009532	2R:5746268-5746421	-	2R:9858763-9858916	-	1	Intronic	1.945	2.77
XLOC_009533	2R:5746622-5747233	-	2R:9859117-9859728	-	1	Intronic	1.739	2.754
XLOC_009534	2R:5747390-5747570	-	2R:9859885-9860065	-	1	Intronic	2.065	2.658
XLOC_009541	2R:5789289-5789601	-	2R:9901784-9902096	-	1	Intronic	-2.884	-0.151
XLOC_009542	2R:5789726-5790491	-	2R:9902221-9902986	-	1	Intronic	-1.303	0.418
XLOC_009545	2R:5806570-5806913	-	2R:9919065-9919408	-	1	Intronic	-0.114	0.801
XLOC_009546	2R:5807317-5808017	-	2R:9919812-9920512	-	1	Intronic	-0.517	0.485
XLOC_009547	2R:5821902-5828193	-	2R:9934397-9940688	-	1	Intronic	-0.989	-0.098
XLOC_009552	2R:5887487-5890117	-	2R:9999982-10002612	-	1	Intronic	0.381	1.122
XLOC_009553	2R:5890384-5892415	-	2R:10002879-10004910	-	1	Intronic	0.334	0.794
XLOC_009554	2R:5899083-5899388	-	2R:10011578-10011883	-	1	Intronic	0.737	1.212
XLOC_009555	2R:5900011-5900328	-	2R:10012506-10012823	-	1	Intronic	0.527	1.024
XLOC_009556	2R:5900415-5900682	-	2R:10012910-10013177	-	1	Intronic	0.746	1.27
XLOC_009557	2R:5905757-5906045	-	2R:10018252-10018540	-	1	Intronic	1.133	1.659
XLOC_009558	2R:5906512-5906688	-	2R:10019007-10019183	-	1	Intronic	0.783	1.399
XLOC_009559	2R:5910424-5910931	-	2R:10022919-10023426	-	1	Intronic	0.863	1.273
XLOC_009561	2R:5917903-5918426	-	2R:10030398-10030921	-	1	Anti-Sense	0.098	0.589
XLOC_009577	2R:6037123-6037970	-	2R:10149618-10150465	-	1	Intronic	-0.555	0.638
XLOC_009578	2R:6062885-6063273	-	2R:10175380-10175768	-	1	Intronic	-1.737	0.364
XLOC_009579	2R:6074054-6074983	-	2R:10186549-10187478	-	1	Intronic	-1.145	0.227
XLOC_009580	2R:6075199-6076621	-	2R:10187694-10189116	-	1	Intronic	-0.777	0.467
XLOC_009581	2R:6076960-6077942	-	2R:10189455-10190437	-	1	Intronic	-0.723	0.571
XLOC_009582	2R:6078057-6078434	-	2R:10190552-10190929	-	1	Intronic	-0.807	0.691
XLOC_009583	2R:6078543-6079401	-	2R:10191038-10191896	-	1	Intronic	-0.251	1.006
XLOC_009594	2R:6255169-6256708	-	2R:10367664-10369203	-	1	Intronic	-1.005	-0.563
XLOC_009595	2R:6256920-6257934	-	2R:10369415-10370429	-	1	Intronic	-1.219	-0.532
XLOC_009596	2R:6259162-6259568	-	2R:10371657-10372063	-	1	Intronic	-1.59	-0.793
XLOC_009607	2R:6360987-6362758	-	2R:10473482-10475253	-	1	Intronic	2.348	2.917
XLOC_009610	2R:6427301-6428849	-	2R:10539796-10541344	-	1	Intronic	2.743	3.085
XLOC_009621	2R:6613098-6614239	-	2R:10725593-10726734	-	1	Anti-Sense	-1.413	0.424
XLOC_009622	2R:6619533-6621797	-	2R:10732028-10734292	-	1	Anti-Sense	-1.401	-0.397
XLOC_009625	2R:6629970-6630330	-	2R:10742465-10742825	-	1	Intronic	-2.873	-0.684
XLOC_009626	2R:6631305-6631510	-	2R:10743800-10744005	-	1	Intronic	-2.253	-0.114
XLOC_009627	2R:6646670-6647224	-	2R:10759165-10759719	-	1	Intronic	-0.072	1.002
XLOC_009629	2R:6689266-6689690	-	2R:10801761-10802185	-	1	Intronic	-1.731	-1.048
XLOC_009651	2R:6894015-6894874	-	2R:11006510-11007369	-	1	Intronic	-0.924	-0.346
XLOC_009652	2R:6932966-6934630	-	2R:11045461-11047125	-	1	Intronic	-1.161	-0.544
XLOC_009653	2R:6948724-6954410	-	2R:11061219-11066905	-	1	Intronic	-0.976	-0.461
XLOC_009654	2R:6969363-6969954	-	2R:11081858-11082449	-	1	Intronic	-1.44	-0.57
XLOC_009655	2R:6970078-6971563	-	2R:11082573-11084058	-	1	Intronic	-1.199	-0.653
XLOC_009702	2R:7306078-7308749	-	2R:11418573-11421244	-	1	Intronic	0.121	1.21
XLOC_009703	2R:7313340-7313464	-	2R:11425835-11425959	-	1	Intronic	-0.407	1.513
XLOC_009704	2R:7314244-7314586	-	2R:11426739-11427081	-	1	Intronic	0.356	1.58
XLOC_009705	2R:7315385-7316002	-	2R:11427880-11428497	-	1	Intronic	0.36	1.457
XLOC_009737	2R:7514888-7515517	-	2R:11627383-11628012	-	1	Intronic	0.791	1.708
XLOC_009738	2R:7515631-7516772	-	2R:11628126-11629267	-	1	Intronic	1.221	2.105
XLOC_009739	2R:7533953-7534268	-	2R:11646448-11646763	-	1	Intronic	-0.152	1.058
XLOC_009740	2R:7536644-7537954	-	2R:11649139-11650449	-	1	Intronic	0.812	1.73
XLOC_009838	2R:8230572-8231306	-	2R:12343067-12343801	-	1	Intronic	-0.917	-0.534
XLOC_009839	2R:8231392-8231933	-	2R:12343887-12344428	-	1	Intronic	-0.396	0.079
XLOC_009866	2R:8468143-8468316	-	2R:12580638-12580811	-	1	Intronic	1.096	1.536
XLOC_009867	2R:8468372-8468693	-	2R:12580867-12581188	-	1	Intronic	0.267	0.751
XLOC_009872	2R:8530188-8530643	-	2R:12642683-12643138	-	1	Intronic	-1.848	-1.91
XLOC_009876	2R:8565008-8566683	-	2R:12677503-12679178	-	1	Intronic	-1.632	-0.991
XLOC_009973	2R:9312371-9312821	-	2R:13424866-13425316	-	1	Intronic	-2.415	-0.053
XLOC_009978	2R:9350343-9354773	-	2R:13462838-13467268	-	1	Intronic	-2.08	-1.169
XLOC_009979	2R:9354903-9356315	-	2R:13467398-13468810	-	1	Intronic	-1.785	-0.744
XLOC_009981	2R:9375646-9376267	-	2R:13488141-13488762	-	1	Intronic	1.171	2.118
XLOC_009982	2R:9379408-9379675	-	2R:13491903-13492170	-	1	Intronic	-0.151	0.66
XLOC_009984	2R:9387688-9387973	-	2R:13500183-13500468	-	1	Intronic	0.687	0.906
XLOC_009985	2R:9389826-9390189	-	2R:13502321-13502684	-	1	Anti-Sense	1.924	1.981
XLOC_009990	2R:9433235-9433791	-	2R:13545730-13546286	-	1	Intronic	0.365	0.715
XLOC_010024	2R:9754951-9755318	-	2R:13867446-13867813	-	1	Intronic	0.101	1.306
XLOC_010025	2R:9755393-9755628	-	2R:13867888-13868123	-	1	Intronic	-1.853	0.042
XLOC_010026	2R:9758865-9759157	-	2R:13871360-13871652	-	1	Intronic	-0.363	0.912
XLOC_010027	2R:9770294-9770790	-	2R:13882789-13883285	-	1	Intronic	0.332	1.587
XLOC_010028	2R:9770853-9771188	-	2R:13883348-13883683	-	1	Intronic	0.555	1.841
XLOC_010029	2R:9782903-9783160	-	2R:13895398-13895655	-	1	Intronic	0.831	1.82
XLOC_010030	2R:9783747-9784043	-	2R:13896242-13896538	-	1	Intronic	0.777	1.806
XLOC_010031	2R:9784133-9784509	-	2R:13896628-13897004	-	1	Intronic	0.807	1.77
XLOC_010032	2R:9785959-9786095	-	2R:13898454-13898590	-	1	Intronic	-0.605	1.368
XLOC_010033	2R:9786551-9786933	-	2R:13899046-13899428	-	1	Intronic	0.061	1.342
XLOC_010034	2R:9787185-9787812	-	2R:13899680-13900307	-	1	Intronic	0.999	2.128
XLOC_010035	2R:9788208-9788941	-	2R:13900703-13901436	-	1	Intronic	1.141	2.253
XLOC_010036	2R:9813121-9813409	-	2R:13925616-13925904	-	1	Intronic	-2.293	-0.369
XLOC_010038	2R:9838425-9839113	-	2R:13950920-13951608	-	1	Intronic	1.05	1.759
XLOC_010039	2R:9839194-9840551	-	2R:13951689-13953046	-	1	Intronic	1.61	2.279
XLOC_010041	2R:9865581-9866330	-	2R:13978076-13978825	-	1	Intronic	0.685	1.005
XLOC_010053	2R:9999474-9999776	-	2R:14111969-14112271	-	1	Intronic	-0.907	0.363
XLOC_010054	2R:10000028-10000247	-	2R:14112523-14112742	-	1	Intronic	-0.868	0.54
XLOC_010055	2R:10000725-10000960	-	2R:14113220-14113455	-	1	Intronic	-0.323	0.827
XLOC_010056	2R:10001107-10001385	-	2R:14113602-14113880	-	1	Intronic	-2.093	-0.216
XLOC_010057	2R:10001820-10002422	-	2R:14114315-14114917	-	1	Intronic	-1.569	1.374
XLOC_010058	2R:10002597-10002816	-	2R:14115092-14115311	-	1	Intronic	-1.525	-0.35
XLOC_010059	2R:10006358-10006833	-	2R:14118853-14119328	-	1	Intronic	0.074	0.825
XLOC_010060	2R:10007312-10007779	-	2R:14119807-14120274	-	1	Intronic	0.971	1.7
XLOC_010061	2R:10009600-10011281	-	2R:14122095-14123776	-	1	Intronic	0.512	1.179
XLOC_010062	2R:10011496-10012704	-	2R:14123991-14125199	-	1	Intronic	1.109	1.822
XLOC_010063	2R:10017439-10017880	-	2R:14129934-14130375	-	1	Intronic	-0.352	0.586
XLOC_010064	2R:10018136-10018504	-	2R:14130631-14130999	-	1	Intronic	-0.421	0.638
XLOC_010065	2R:10019793-10020010	-	2R:14132288-14132505	-	1	Intronic	-0.294	1.01
XLOC_010066	2R:10020762-10021103	-	2R:14133257-14133598	-	1	Intronic	0.261	1.089
XLOC_010067	2R:10021501-10021816	-	2R:14133996-14134311	-	1	Intronic	-0.715	0.108
XLOC_010068	2R:10022271-10022749	-	2R:14134766-14135244	-	1	Intronic	0.098	0.885
XLOC_010069	2R:10022821-10023311	-	2R:14135316-14135806	-	1	Intronic	0.375	1.084
XLOC_010070	2R:10023856-10024092	-	2R:14136351-14136587	-	1	Intronic	-0.355	0.676
XLOC_010071	2R:10024489-10024970	-	2R:14136984-14137465	-	1	Intronic	0.035	0.856
XLOC_010072	2R:10025211-10025461	-	2R:14137706-14137956	-	1	Intronic	0.264	1.213
XLOC_010073	2R:10025942-10026834	-	2R:14138437-14139329	-	1	Intronic	0.441	1.161
XLOC_010158	2R:10806839-10811300	-	2R:14919334-14923795	-	1	Intronic	-1.531	-1.232
XLOC_010161	2R:10834327-10834682	-	2R:14946822-14947177	-	1	Intronic	0.972	2.314
XLOC_010189	2R:11095308-11097316	-	2R:15207803-15209811	-	1	Anti-Sense	0.45	0.745
XLOC_010192	2R:11112170-11115531	-	2R:15224665-15228026	-	1	Anti-Sense	-0.505	-1.286
XLOC_010197	2R:11152874-11153105	-	2R:15265369-15265600	-	1	Intronic	0.063	0.849
XLOC_010198	2R:11156271-11156773	-	2R:15268766-15269268	-	1	Intronic	-3.215	-0.417
XLOC_010199	2R:11159074-11160037	-	2R:15271569-15272532	-	1	Intronic	-0.713	0.189
XLOC_010200	2R:11163479-11164891	-	2R:15275974-15277386	-	1	Intronic	-0.967	-0.489
XLOC_010201	2R:11165826-11166707	-	2R:15278321-15279202	-	1	Intronic	-0.593	0.042
XLOC_010202	2R:11166915-11167225	-	2R:15279410-15279720	-	1	Intronic	-1.017	-0.226
XLOC_010203	2R:11168976-11169899	-	2R:15281471-15282394	-	1	Intronic	-0.487	0.095
XLOC_010230	2R:11368132-11368571	-	2R:15480627-15481066	-	1	Intronic	1.113	1.271
XLOC_010235	2R:11407985-11409336	-	2R:15520480-15521831	-	1	Intronic	0.535	1.522
XLOC_010236	2R:11416257-11418150	-	2R:15528752-15530645	-	1	Intronic	-0.351	0.229
XLOC_010237	2R:11418904-11419616	-	2R:15531399-15532111	-	1	Intronic	1.916	2.341
XLOC_010265	2R:11661517-11661789	-	2R:15774012-15774284	-	1	Intronic	-0.978	0.707
XLOC_010266	2R:11663604-11663973	-	2R:15776099-15776468	-	1	Intronic	-0.809	0.572
XLOC_010267	2R:11664126-11664454	-	2R:15776621-15776949	-	1	Intronic	-0.513	0.941
XLOC_010268	2R:11669457-11670527	-	2R:15781952-15783022	-	1	Intronic	0.684	1.332
XLOC_010269	2R:11676023-11683358	-	2R:15788518-15795853	-	1	Anti-Sense	-0.171	0.935
XLOC_010270	2R:11683455-11689999	-	2R:15795950-15802494	-	1	Intronic	0.394	1.464
XLOC_010271	2R:11698142-11698322	-	2R:15810637-15810817	-	1	Intronic	1.026	3.75
XLOC_010272	2R:11698418-11698572	-	2R:15810913-15811067	-	1	Intronic	1.215	4.167
XLOC_010300	2R:11818355-11818624	-	2R:15930850-15931119	-	1	Intronic	-0.372	0.256
XLOC_010303	2R:11883875-11884321	-	2R:15996370-15996816	-	1	Intronic	2.041	2.848
XLOC_010311	2R:11980145-11980485	-	2R:16092640-16092980	-	1	Intronic	-2.799	-0.631
XLOC_010312	2R:11985274-11985587	-	2R:16097769-16098082	-	1	Intronic	0.075	0.533
XLOC_010326	2R:12114445-12114921	-	2R:16226940-16227416	-	1	Intronic	-2.754	-1.123
XLOC_010365	2R:12449171-12449924	-	2R:16561666-16562419	-	1	Intronic	-4.521	0.775
XLOC_010375	2R:12526325-12527025	-	2R:16638820-16639520	-	1	Intronic	-2.424	-0.976
XLOC_010383	2R:12578360-12579147	-	2R:16690855-16691642	-	1	Anti-Sense	-1.209	-0.827
XLOC_010384	2R:12581264-12585480	-	2R:16693759-16697975	-	1	Intronic	0.335	0.723
XLOC_010385	2R:12591219-12591754	-	2R:16703714-16704249	-	1	Intronic	-3.585	-0.023
XLOC_010386	2R:12593880-12600542	-	2R:16706375-16713037	-	1	Intronic	-0.912	-0.471
XLOC_010387	2R:12603759-12606949	-	2R:16716254-16719444	-	1	Intronic	-1.604	-0.969
XLOC_010394	2R:12648247-12648858	-	2R:16760742-16761353	-	1	Intronic	0.058	1.579
XLOC_010403	2R:12709745-12713803	-	2R:16822240-16826298	-	2	Anti-Sense	-1.92	-1.2
XLOC_010436	2R:12964671-12966541	-	2R:17077166-17079036	-	1	Intronic	-1.076	-0.176
XLOC_010437	2R:12972070-12972682	-	2R:17084565-17085177	-	1	Intronic	-0.67	0.352
XLOC_010460	2R:13327837-13328972	-	2R:17440332-17441467	-	1	Anti-Sense	0.784	1.155
XLOC_010461	2R:13329053-13329397	-	2R:17441548-17441892	-	1	Anti-Sense	0.971	1.467
XLOC_010462	2R:13330045-13331152	-	2R:17442540-17443647	-	1	Intronic	1.531	1.91
XLOC_010463	2R:13331402-13331637	-	2R:17443897-17444132	-	1	Intronic	1.929	2.414
XLOC_010475	2R:13408434-13409200	-	2R:17520929-17521695	-	1	Intronic	0.243	0.794
XLOC_010476	2R:13409412-13410355	-	2R:17521907-17522850	-	1	Intronic	0.411	0.937
XLOC_010477	2R:13421431-13421708	-	2R:17533926-17534203	-	1	Intronic	-0.71	0.228
XLOC_010478	2R:13421850-13422061	-	2R:17534345-17534556	-	1	Intronic	-1.69	-1.149
XLOC_010490	2R:13564363-13564885	-	2R:17676858-17677380	-	1	Intronic	1.136	1.584
XLOC_010491	2R:13567485-13568774	-	2R:17679980-17681269	-	1	Intronic	0.075	0.441
XLOC_010495	2R:13593204-13593676	-	2R:17705699-17706171	-	1	Intronic	0.04	1.072
XLOC_010496	2R:13597622-13598284	-	2R:17710117-17710779	-	1	Intronic	0.097	1.064
XLOC_010543	2R:14020854-14021324	-	2R:18133349-18133819	-	1	Intronic	-0.579	0.132
XLOC_010544	2R:14021620-14021910	-	2R:18134115-18134405	-	1	Intronic	2.847	2.929
XLOC_010555	2R:14178206-14179416	-	2R:18290701-18291911	-	1	Intronic	-1.923	-0.769
XLOC_010556	2R:14179582-14189645	-	2R:18292077-18302140	-	1	Anti-Sense	-1.112	-0.203
XLOC_010557	2R:14194363-14194946	-	2R:18306858-18307441	-	1	Intronic	-2.644	-1.132
XLOC_010558	2R:14197081-14198959	-	2R:18309576-18311454	-	1	Intronic	-1.567	-0.54
XLOC_010559	2R:14199787-14201309	-	2R:18312282-18313804	-	1	Intronic	-1.528	-0.448
XLOC_010560	2R:14202508-14205870	-	2R:18315003-18318365	-	1	Intronic	-1.519	-0.575
XLOC_010561	2R:14206011-14207652	-	2R:18318506-18320147	-	1	Intronic	-0.998	-0.021
XLOC_010562	2R:14221085-14221929	-	2R:18333580-18334424	-	1	Intronic	-2.311	-0.744
XLOC_010563	2R:14222801-14223961	-	2R:18335296-18336456	-	1	Intronic	-2.162	-0.828
XLOC_010564	2R:14224732-14229631	-	2R:18337227-18342126	-	1	Intronic	-1.192	-0.162
XLOC_010565	2R:14231278-14232309	-	2R:18343773-18344804	-	1	Intronic	-2.119	-0.724
XLOC_010566	2R:14232472-14234736	-	2R:18344967-18347231	-	1	Intronic	-1.327	-0.294
XLOC_010576	2R:14324264-14324491	-	2R:18436759-18436986	-	1	Intronic	1.358	2.397
XLOC_010577	2R:14324787-14325044	-	2R:18437282-18437539	-	1	Intronic	1.977	2.947
XLOC_010578	2R:14325486-14325712	-	2R:18437981-18438207	-	1	Intronic	2.457	3.251
XLOC_010579	2R:14326321-14326465	-	2R:18438816-18438960	-	1	Intronic	1.3	2.18
XLOC_010580	2R:14326594-14326731	-	2R:18439089-18439226	-	1	Intronic	1.139	2.212
XLOC_010591	2R:14369756-14374768	-	2R:18482251-18487263	-	1	Intronic	-2.517	-0.8
XLOC_010592	2R:14374829-14375354	-	2R:18487324-18487849	-	1	Intronic	-3.414	-0.554
XLOC_010603	2R:14450464-14463359	-	2R:18562959-18575854	-	1	Intronic	-1.129	-0.574
XLOC_010604	2R:14491595-14492077	-	2R:18604090-18604572	-	1	Intronic	-0.562	-0.165
XLOC_010605	2R:14492578-14495090	-	2R:18605073-18607585	-	1	Intronic	-0.331	0.022
XLOC_010609	2R:14521910-14522215	-	2R:18634405-18634710	-	1	Intronic	-0.551	0.358
XLOC_010610	2R:14522450-14523647	-	2R:18634945-18636142	-	1	Intronic	1.239	1.429
XLOC_010612	2R:14533506-14533745	-	2R:18646001-18646240	-	1	Intronic	-0.435	1.43
XLOC_010613	2R:14534333-14535079	-	2R:18646828-18647574	-	1	Intronic	0.084	1.419
XLOC_010614	2R:14537653-14538267	-	2R:18650148-18650762	-	1	Intronic	0.335	1.616
XLOC_010615	2R:14538782-14539824	-	2R:18651277-18652319	-	1	Intronic	0.522	1.757
XLOC_010616	2R:14540382-14541929	-	2R:18652877-18654424	-	1	Intronic	-1.586	-0.922
XLOC_010617	2R:14542055-14543027	-	2R:18654550-18655522	-	1	Intronic	-1.889	-1.228
XLOC_010624	2R:14655160-14658422	-	2R:18767655-18770917	-	1	Anti-Sense	-1.642	-0.898
XLOC_010628	2R:14687929-14688458	-	2R:18800424-18800953	-	1	Intronic	1.429	2.122
XLOC_010631	2R:14698212-14698558	-	2R:18810707-18811053	-	1	Intronic	2.113	2.965
XLOC_010696	2R:15208421-15210225	-	2R:19320916-19322720	-	1	Intronic	-2.025	-0.88
XLOC_010702	2R:15258152-15260144	-	2R:19370647-19372639	-	1	Intronic	-1.813	-0.561
XLOC_010709	2R:15303126-15303247	-	2R:19415621-19415742	-	1	Intronic	2.011	2.331
XLOC_010710	2R:15303390-15303702	-	2R:19415885-19416197	-	1	Intronic	1.402	1.58
XLOC_010711	2R:15304320-15304631	-	2R:19416815-19417126	-	1	Intronic	1.596	1.883
XLOC_010712	2R:15304820-15305005	-	2R:19417315-19417500	-	1	Intronic	1.118	1.544
XLOC_010713	2R:15306330-15306981	-	2R:19418825-19419476	-	1	Intronic	-0.902	-0.542
XLOC_010714	2R:15308241-15308573	-	2R:19420736-19421068	-	1	Intronic	0.098	0.632
XLOC_010715	2R:15309177-15309493	-	2R:19421672-19421988	-	1	Intronic	0.1	0.513
XLOC_010716	2R:15310587-15310840	-	2R:19423082-19423335	-	1	Intronic	-0.012	0.378
XLOC_010718	2R:15331401-15332511	-	2R:19443896-19445006	-	1	Anti-Sense	-1.153	-0.163
XLOC_010726	2R:15354187-15354643	-	2R:19466682-19467138	-	1	Anti-Sense	-2.022	0.044
XLOC_010732	2R:15418425-15419622	-	2R:19530920-19532117	-	1	Intronic	-1.533	-0.299
XLOC_010733	2R:15420813-15421217	-	2R:19533308-19533712	-	1	Intronic	-3.377	-0.706
XLOC_010734	2R:15422665-15423289	-	2R:19535160-19535784	-	1	Intronic	-1.953	-0.045
XLOC_010735	2R:15423504-15423869	-	2R:19535999-19536364	-	1	Intronic	-2.024	0.224
XLOC_010738	2R:15471498-15471949	-	2R:19583993-19584444	-	1	Intronic	-1.246	0.259
XLOC_010739	2R:15472283-15473040	-	2R:19584778-19585535	-	1	Intronic	-0.782	0.493
XLOC_010740	2R:15473098-15476306	-	2R:19585593-19588801	-	1	Anti-Sense	-0.29	0.887
XLOC_010741	2R:15476946-15477525	-	2R:19589441-19590020	-	1	Intronic	-2.015	-0.475
XLOC_010742	2R:15477711-15479010	-	2R:19590206-19591505	-	1	Intronic	-1.157	0.658
XLOC_010743	2R:15479186-15479739	-	2R:19591681-19592234	-	1	Intronic	-1.523	-0.015
XLOC_010744	2R:15480773-15481318	-	2R:19593268-19593813	-	1	Anti-Sense	-1.586	-0.239
XLOC_010745	2R:15482545-15482968	-	2R:19595040-19595463	-	1	Anti-Sense	-2.249	-0.634
XLOC_010746	2R:15484658-15488378	-	2R:19597153-19600873	-	1	Intronic	-0.285	0.78
XLOC_010747	2R:15489070-15490414	-	2R:19601565-19602909	-	1	Intronic	-0.926	0.047
XLOC_010748	2R:15491250-15491997	-	2R:19603745-19604492	-	1	Anti-Sense	-0.8	0.245
XLOC_010750	2R:15493439-15494162	-	2R:19605934-19606657	-	1	Intronic	-0.151	0.748
XLOC_010752	2R:15509377-15509927	-	2R:19621872-19622422	-	1	Intronic	-1.285	-0.155
XLOC_010753	2R:15511105-15511785	-	2R:19623600-19624280	-	1	Intronic	-0.998	0.136
XLOC_010754	2R:15512262-15512728	-	2R:19624757-19625223	-	1	Intronic	-1.118	-0.172
XLOC_010755	2R:15514649-15514874	-	2R:19627144-19627369	-	1	Intronic	-1.537	0.384
XLOC_010756	2R:15515017-15515390	-	2R:19627512-19627885	-	1	Intronic	-0.822	0.575
XLOC_010757	2R:15516676-15517453	-	2R:19629171-19629948	-	1	Intronic	-0.565	0.584
XLOC_010865	2R:16142218-16142359	-	2R:20254713-20254854	-	1	Intergenic	-0.681	-0.019
XLOC_010876	2R:16193338-16193577	-	2R:20305833-20306072	-	1	Intronic	-1.533	-1.61
XLOC_010877	2R:16194165-16194637	-	2R:20306660-20307132	-	1	Intronic	-0.007	0.459
XLOC_010913	2R:16461437-16461784	-	2R:20573932-20574279	-	1	Intronic	-2.675	-1.044
XLOC_010915	2R:16462494-16462620	-	2R:20574989-20575115	-	1	Intronic	-2.965	-0.706
XLOC_010916	2R:16463554-16464433	-	2R:20576049-20576928	-	1	Intronic	-0.916	-0.022
XLOC_010917	2R:16464563-16465212	-	2R:20577058-20577707	-	1	Intronic	-1.575	-0.274
XLOC_010919	2R:16465816-16466552	-	2R:20578311-20579047	-	1	Intronic	-0.642	0.319
XLOC_010920	2R:16466821-16467610	-	2R:20579316-20580105	-	1	Intronic	-0.757	0.258
XLOC_010921	2R:16467857-16468870	-	2R:20580352-20581365	-	1	Intronic	-0.185	0.711
XLOC_010926	2R:16503841-16504148	-	2R:20616336-20616643	-	1	Intronic	-1.599	0.28
XLOC_010927	2R:16504972-16505300	-	2R:20617467-20617795	-	1	Intronic	-0.666	0.674
XLOC_010983	2R:17043619-17044135	-	2R:21156114-21156630	-	1	Intronic	-1.039	-0.315
XLOC_010985	2R:17053384-17054233	-	2R:21165879-21166728	-	1	Intronic	0.848	1.095
XLOC_011006	2R:17245658-17246284	-	2R:21358153-21358779	-	1	Intronic	-2.073	-0.875
XLOC_011007	2R:17246738-17250222	-	2R:21359233-21362717	-	1	Intronic	-1.825	-0.946
XLOC_011014	2R:17282612-17282995	-	2R:21395107-21395490	-	1	Intronic	0.749	1.275
XLOC_011015	2R:17283222-17283387	-	2R:21395717-21395882	-	1	Intronic	0.356	1.156
XLOC_011016	2R:17283505-17283818	-	2R:21396000-21396313	-	1	Intronic	0.665	1.226
XLOC_011017	2R:17283943-17284145	-	2R:21396438-21396640	-	1	Intronic	-0.084	0.69
XLOC_011018	2R:17284559-17285071	-	2R:21397054-21397566	-	1	Intronic	0.75	1.384
XLOC_011019	2R:17288805-17289687	-	2R:21401300-21402182	-	1	Intronic	-0.609	0.154
XLOC_011020	2R:17289788-17290177	-	2R:21402283-21402672	-	1	Intronic	-0.478	0.362
XLOC_011021	2R:17290335-17291453	-	2R:21402830-21403948	-	1	Intronic	-0.184	0.53
XLOC_011022	2R:17292338-17292961	-	2R:21404833-21405456	-	1	Intronic	0.017	0.728
XLOC_011023	2R:17293189-17293643	-	2R:21405684-21406138	-	1	Intronic	0.071	0.863
XLOC_011024	2R:17294505-17294816	-	2R:21407000-21407311	-	1	Intronic	0.014	0.848
XLOC_011025	2R:17294886-17298360	-	2R:21407381-21410855	-	1	Intronic	0.667	1.337
XLOC_011026	2R:17298504-17298963	-	2R:21410999-21411458	-	1	Intronic	0.628	1.337
XLOC_011027	2R:17299042-17299751	-	2R:21411537-21412246	-	1	Intronic	0.697	1.39
XLOC_011028	2R:17320750-17320930	-	2R:21433245-21433425	-	1	Intronic	1.615	2.22
XLOC_011029	2R:17321729-17322013	-	2R:21434224-21434508	-	1	Intronic	1.551	2.201
XLOC_011030	2R:17322143-17322590	-	2R:21434638-21435085	-	1	Intronic	1.277	1.891
XLOC_011031	2R:17322837-17324197	-	2R:21435332-21436692	-	1	Intronic	1.425	2.033
XLOC_011032	2R:17332915-17333040	-	2R:21445410-21445535	-	1	Intronic	-0.777	0.221
XLOC_011033	2R:17337758-17337945	-	2R:21450253-21450440	-	1	Intronic	0.436	1.506
XLOC_011034	2R:17341934-17343156	-	2R:21454429-21455651	-	1	Intronic	0.165	0.801
XLOC_011035	2R:17343352-17344235	-	2R:21455847-21456730	-	1	Intronic	0.306	0.886
XLOC_011036	2R:17344687-17345034	-	2R:21457182-21457529	-	1	Intronic	0.548	1.173
XLOC_011037	2R:17345131-17345414	-	2R:21457626-21457909	-	1	Intronic	-0.395	0.543
XLOC_011038	2R:17347565-17348769	-	2R:21460060-21461264	-	1	Intronic	0.902	1.539
XLOC_011039	2R:17367908-17368513	-	2R:21480403-21481008	-	1	Intronic	3.505	3.97
XLOC_011053	2R:17534062-17536101	-	2R:21646557-21648596	-	1	Intronic	-3.842	-0.03
XLOC_011120	2R:18085543-18086319	-	2R:22198038-22198814	-	1	Intronic	-1.079	-0.94
XLOC_011121	2R:18086667-18086890	-	2R:22199162-22199385	-	1	Intronic	-1.558	-1.78
XLOC_011122	2R:18087585-18089982	-	2R:22200080-22202477	-	1	Anti-Sense	-0.6	-0.756
XLOC_011127	2R:18115147-18115611	-	2R:22227642-22228106	-	1	Intronic	-1.99	-0.059
XLOC_011135	2R:18188988-18189272	-	2R:22301483-22301767	-	1	Intronic	-0.106	0.995
XLOC_011136	2R:18190399-18195695	-	2R:22302894-22308190	-	1	Intronic	0.485	1.29
XLOC_011140	2R:18230334-18232100	-	2R:22342829-22344595	-	1	Intronic	-2.038	-0.629
XLOC_011141	2R:18244130-18245294	-	2R:22356625-22357789	-	1	Intronic	-2.252	-0.342
XLOC_011156	2R:18387374-18394268	-	2R:22499869-22506763	-	1	Intronic	-1.359	-0.376
XLOC_011158	2R:18416797-18422307	-	2R:22529292-22534802	-	1	Intronic	-0.831	0.156
XLOC_011162	2R:18474769-18475321	-	2R:22587264-22587816	-	1	Intronic	1.163	2.354
XLOC_011163	2R:18476078-18476341	-	2R:22588573-22588836	-	1	Intronic	1.141	2.387
XLOC_011174	2R:18613170-18614544	-	2R:22725665-22727039	-	1	Intronic	-2.134	-0.966
XLOC_011175	2R:18624678-18627873	-	2R:22737173-22740368	-	1	Intronic	-0.01	1.208
XLOC_011178	2R:18680905-18682495	-	2R:22793400-22794990	-	1	Intronic	-2.579	-0.676
XLOC_011197	2R:18884069-18886220	-	2R:22996546-22998697	-	1	Intronic	1.54	1.831
XLOC_011225	2R:19087649-19088267	-	2R:23200126-23200744	-	1	Intronic	-2.854	1.189
XLOC_011281	2R:19440699-19440983	-	2R:23553176-23553460	-	1	Anti-Sense	0.953	0.95
XLOC_011284	2R:19502990-19503604	-	2R:23615467-23616081	-	1	Intronic	-2.475	-0.614
XLOC_011326	2R:19891750-19892286	-	2R:24004227-24004763	-	1	Intronic	-0.163	1.15
XLOC_011337	2R:20017965-20019013	-	2R:24130442-24131490	-	1	Intronic	-1.216	-0.087
XLOC_011372	2R:20400995-20402037	-	2R:24513472-24514514	-	1	Intronic	0.488	1.119
XLOC_011382	2R:20485512-20486475	-	2R:24597989-24598952	-	1	Anti-Sense	-0.697	-0.528
XLOC_011422	2R:20821094-20821448	-	2R:24933571-24933925	-	1	Intronic	-4.448	0.686
XLOC_011423	2R:20823870-20824138	-	2R:24936347-24936615	-	1	Intronic	-6.579	2.583
XLOC_011431	2R:20866593-20866743	-	2R:24979070-24979220	-	1	Intronic	-0.994	1.519
XLOC_011432	2R:20867273-20867748	-	2R:24979750-24980225	-	1	Intronic	0.627	2.004
XLOC_011434	2R:20885829-20887556	-	2R:24998306-25000033	-	1	Intronic	0.511	0.89
XLOC_011435	2R:20896687-20896886	-	2R:25009164-25009363	-	1	Intronic	0.537	0.557
XLOC_011598	2RHet:199371-199659	+	2R:1072657-1072945	+	1	Intronic	2.281	2.802
XLOC_011599	2RHet:199765-199925	+	2R:1073051-1073211	+	1	Intronic	2.086	2.78
XLOC_011600	2RHet:200093-200470	+	2R:1073379-1073756	+	1	Intronic	2.175	2.717
XLOC_011601	2RHet:213847-214984	+	2R:1087133-1088270	+	1	Intronic	1.961	2.663
XLOC_011602	2RHet:216019-218480	+	2R:1089305-1091766	+	1	Intronic	1.182	1.857
XLOC_011603	2RHet:218537-219018	+	2R:1091823-1092304	+	1	Intronic	0.997	1.7
XLOC_011604	2RHet:219082-219204	+	2R:1092368-1092490	+	1	Intronic	-1.343	0.339
XLOC_011605	2RHet:219958-221166	+	2R:1093244-1094452	+	1	Intronic	1.148	1.867
XLOC_011606	2RHet:222588-223014	+	2R:1095874-1096300	+	1	Intronic	0.293	1.186
XLOC_011607	2RHet:236802-239822	+	2R:1110088-1113108	+	1	Intronic	1.008	1.801
XLOC_011608	2RHet:240443-242183	+	2R:1113729-1115469	+	1	Intronic	1.757	1.991
XLOC_011609	2RHet:242370-242874	+	2R:1115656-1116160	+	1	Intronic	-0.249	0.569
XLOC_011610	2RHet:242949-243476	+	2R:1116235-1116762	+	1	Intronic	0.411	1.027
XLOC_011611	2RHet:244034-244446	+	2R:1117320-1117732	+	1	Intronic	-0.055	0.633
XLOC_011620	2RHet:395106-395847	+	2R:1268473-1269214	+	1	Intergenic	-0.519	0.012
XLOC_011627	2RHet:566382-567754	+	2R:1439749-1441121	+	1	Intronic	-4.167	1.298
XLOC_011651	2RHet:861402-862533	+	2R:2118343-2119474	+	1	Anti-Sense	-1.48	-1.308
XLOC_011663	2RHet:1111250-1139594	+	2R:2338530-2372142	+	4	Intergenic	-3.927	0.547
XLOC_011668	2RHet:1336060-1336996	+	2R:2565397-2566333	+	1	Intergenic	-0.605	-1.899
XLOC_011689	2RHet:1862174-1862559	+	2R:3079112-3079497	+	1	Intronic	-2.448	-0.073
XLOC_011690	2RHet:1872650-1874967	+	2R:3089588-3091905	+	1	Intronic	-1.379	-0.093
XLOC_011691	2RHet:1875066-1876274	+	2R:3092004-3093212	+	1	Intronic	-1.955	-0.4
XLOC_011692	2RHet:1877268-1877992	+	2R:3094206-3094930	+	1	Intronic	-2.396	-0.505
XLOC_011693	2RHet:1879568-1879956	+	2R:3096506-3096894	+	1	Intronic	-2.907	-0.741
XLOC_011696	2RHet:1889899-1890306	+	2R:3106837-3107244	+	1	Intronic	-2.991	-0.568
XLOC_011700	2RHet:1911743-1913570	+	2R:3128681-3130508	+	1	Intronic	-0.939	0.628
XLOC_011701	2RHet:1914958-1916543	+	2R:3131896-3133481	+	1	Intronic	-0.992	0.645
XLOC_011702	2RHet:1916673-1917037	+	2R:3133611-3133975	+	1	Intronic	-3.091	-0.24
XLOC_011703	2RHet:1918093-1919949	+	2R:3135031-3136887	+	1	Intronic	-1.299	0.367
XLOC_011704	2RHet:1921599-1923490	+	2R:3138537-3140428	+	1	Intronic	-1.338	0.296
XLOC_011705	2RHet:1924263-1926950	+	2R:3141201-3143888	+	1	Intronic	-1.932	-0.257
XLOC_011706	2RHet:1927067-1930583	+	2R:3144005-3147521	+	1	Intronic	-1.137	0.452
XLOC_011707	2RHet:1931872-1932694	+	2R:3148810-3149632	+	1	Intronic	-2.781	-0.385
XLOC_011709	2RHet:1935382-1935850	+	2R:3152320-3152788	+	1	Intronic	-2.949	-0.121
XLOC_011710	2RHet:1939342-1941483	+	2R:3156280-3158421	+	1	Intronic	-2.258	-0.539
XLOC_011712	2RHet:1946370-1947675	+	2R:3163308-3164613	+	1	Intronic	-2.422	-0.544
XLOC_011715	2RHet:1949254-1949763	+	2R:3166192-3166701	+	1	Intronic	-3.393	-0.565
XLOC_011717	2RHet:1952928-1954207	+	2R:3169866-3171145	+	1	Intronic	-2.38	-0.698
XLOC_011718	2RHet:1955747-1957326	+	2R:3172685-3174264	+	1	Intronic	-2.07	-0.361
XLOC_011721	2RHet:1961427-1961632	+	2R:3178365-3178570	+	1	Intronic	-4.816	-1.398
XLOC_011725	2RHet:1983355-1984986	+	2R:3200293-3201924	+	1	Intergenic	-1.804	-0.122
XLOC_011759	2RHet:2857497-2858888	+	3L:27896418-27897809	-	1	Intergenic	-4.738	-0.927
XLOC_011768	2RHet:2904808-2905330	+	3L:27854699-27855221	-	1	Intronic	2.408	2.757
XLOC_011769	2RHet:2917866-2918638	+	3L:27841391-27842163	-	1	Intergenic	-1.227	-0.577
XLOC_011770	2RHet:2919179-2988849	+	3L:27744651-27840850	-	4	Intergenic	-1.302	-0.867
XLOC_011786	2RHet:3198196-3199322	+	2R:4012931-4014057	+	1	Intergenic	-1.534	-1.366
XLOC_011788	2RHet:3202846-3203548	+	2R:4017581-4018283	+	1	Intronic	0.47	0.791
XLOC_011789	2RHet:3215567-3217239	+	2R:4030302-4031974	+	1	Intronic	0.941	1.457
XLOC_011790	2RHet:3231039-3231461	+	2R:4045774-4046196	+	1	Intronic	0.058	0.995
XLOC_011791	2RHet:3236284-3237646	+	2R:4051019-4052381	+	1	Intergenic	-2.117	-0.953
XLOC_011806	2RHet:66768-70833	-	2R:940054-944119	-	1	Intronic	-0.972	0.631
XLOC_011807	2RHet:70895-72445	-	2R:944181-945731	-	1	Intronic	-0.503	1.128
XLOC_011834	2RHet:390510-390958	-	2R:1263877-1264325	-	1	Anti-Sense	-1.691	-1.032
XLOC_011838	2RHet:404240-462554	-	2R:1277607-1335921	-	2	Intergenic	0.739	0.192
XLOC_011842	2RHet:441929-457753	-	2R:1315296-1331120	-	4	Intergenic	-0.834	-1.085
XLOC_011844	2RHet:475876-476125	-	2R:1349243-1349492	-	1	Anti-Sense	-2.254	-2.55
XLOC_011853	2RHet:623448-624599	-	2R:1880378-1881529	-	1	Intronic	-2.296	-0.607
XLOC_011856	2RHet:634115-636906	-	2R:1891045-1893836	-	1	Intronic	-2.227	-0.417
XLOC_011867	2RHet:693292-694788	-	2R:1950222-1951718	-	1	Intronic	-2.655	-0.694
XLOC_011869	2RHet:696355-700332	-	2R:1953285-1957262	-	1	Intronic	-1.907	-0.397
XLOC_011870	2RHet:706319-709015	-	2R:1963249-1965945	-	1	Intronic	-1.462	0.369
XLOC_011871	2RHet:709222-710712	-	2R:1966152-1967642	-	1	Intronic	-2.546	-0.414
XLOC_011873	2RHet:724671-730085	-	2R:1981601-1987015	-	1	Intronic	-0.548	1.115
XLOC_011880	2RHet:757397-760362	-	2R:2014327-2017292	-	1	Intronic	-2.409	-0.579
XLOC_011884	2RHet:777321-778444	-	2R:2034262-2035385	-	1	Intronic	-2.538	-0.356
XLOC_011887	2RHet:787258-792713	-	2R:2044199-2049654	-	1	Intronic	-1.291	0.47
XLOC_011888	2RHet:792773-793666	-	2R:2049714-2050607	-	1	Intronic	-0.938	1.02
XLOC_011889	2RHet:796719-797667	-	2R:2053660-2054608	-	1	Intronic	-2.745	-0.785
XLOC_011891	2RHet:800836-801533	-	2R:2057777-2058474	-	1	Intronic	-3.147	-0.648
XLOC_011892	2RHet:816415-818099	-	2R:2073355-2075039	-	1	Intronic	-1.621	0.119
XLOC_011893	2RHet:819049-820066	-	2R:2075989-2077006	-	1	Intronic	-1.817	0.188
XLOC_011894	2RHet:820673-821073	-	2R:2077613-2078013	-	1	Intronic	-3.363	-0.245
XLOC_011896	2RHet:831446-831731	-	2R:2088386-2088671	-	1	Intronic	-4.845	-1.045
XLOC_011897	2RHet:832842-833104	-	2R:2089782-2090044	-	1	Intronic	-3.145	-0.126
XLOC_011898	2RHet:835749-838897	-	2R:2092689-2095837	-	1	Intronic	-0.706	0.86
XLOC_011899	2RHet:851011-851430	-	2R:2107951-2108370	-	1	Intronic	-1.083	0.814
XLOC_011900	2RHet:852405-853645	-	2R:2109345-2110585	-	1	Intronic	-0.577	1.119
XLOC_011902	2RHet:869749-871745	-	2R:2126690-2128686	-	1	Intronic	-2.12	-0.645
XLOC_011905	2RHet:886804-888114	-	2R:2143745-2145055	-	1	Intronic	-1.987	-0.342
XLOC_011907	2RHet:915492-921710	-	2R:2172434-2178652	-	1	Intronic	-0.847	0.669
XLOC_011908	2RHet:926867-933011	-	2R:2183809-2189953	-	1	Intronic	-0.679	0.865
XLOC_011909	2RHet:933183-934805	-	2R:2190125-2191747	-	1	Intronic	-0.962	0.582
XLOC_011910	2RHet:935206-935919	-	2R:2192148-2192861	-	1	Intronic	-2.329	-0.086
XLOC_011911	2RHet:936050-936991	-	2R:2192992-2193933	-	1	Intronic	-1.101	0.58
XLOC_011912	2RHet:947430-948461	-	2R:2204372-2205403	-	1	Intronic	-1.209	0.315
XLOC_011913	2RHet:954500-959083	-	2R:2211442-2216025	-	1	Intronic	-0.453	1.09
XLOC_011915	2RHet:965572-966253	-	2R:2222521-2223202	-	1	Intronic	-1.177	0.682
XLOC_011917	2RHet:973122-973581	-	2R:2230020-2230479	-	1	Intronic	-2.573	-0.45
XLOC_011919	2RHet:982993-984982	-	2R:2239891-2241880	-	1	Intronic	0.833	2.291
XLOC_011920	2RHet:989250-989719	-	2R:2246148-2246617	-	1	Intronic	-0.596	1.013
XLOC_011921	2RHet:989859-990729	-	2R:2246757-2247627	-	1	Intronic	-0.451	0.943
XLOC_011922	2RHet:990809-992316	-	2R:2247707-2249214	-	1	Intronic	0.104	1.477
XLOC_011923	2RHet:992407-993435	-	2R:2249305-2250333	-	1	Intronic	-0.897	0.467
XLOC_011924	2RHet:993795-995038	-	2R:2250693-2251936	-	1	Intronic	-2.158	-0.595
XLOC_011925	2RHet:995947-996334	-	2R:2252845-2253232	-	1	Intronic	-0.613	0.828
XLOC_011926	2RHet:996785-997377	-	2R:2253683-2254275	-	1	Intronic	-1.571	0.086
XLOC_011927	2RHet:998849-1000046	-	2R:2255747-2256944	-	1	Intronic	0.519	1.78
XLOC_011928	2RHet:1001036-1001314	-	2R:2257934-2258212	-	1	Intronic	-2.318	0.154
XLOC_011929	2RHet:1003747-1004039	-	2R:2260645-2260937	-	1	Intronic	-1.946	0.036
XLOC_011942	2RHet:1258487-1262608	-	2R:2487824-2491945	-	1	Intergenic	-1.039	0.106
XLOC_011943	2RHet:1263466-1264154	-	2R:2492803-2493491	-	1	Intergenic	0.373	1.454
XLOC_011945	2RHet:1268985-1269703	-	2R:2498322-2499040	-	1	Intronic	1.91	2.998
XLOC_011946	2RHet:1278792-1280979	-	2R:2508129-2510316	-	1	Intronic	1.965	3.042
XLOC_011947	2RHet:1285029-1285725	-	2R:2514366-2515062	-	1	Intronic	0.698	1.744
XLOC_011948	2RHet:1297603-1303198	-	2R:2526940-2532535	-	1	Intronic	-0.073	0.391
XLOC_011949	2RHet:1303871-1305806	-	2R:2533208-2535143	-	1	Intronic	0.475	1.001
XLOC_011950	2RHet:1306328-1308033	-	2R:2535665-2537370	-	1	Intronic	0.956	1.466
XLOC_011951	2RHet:1308120-1309834	-	2R:2537457-2539171	-	1	Intronic	0.552	1.045
XLOC_011952	2RHet:1309902-1311651	-	2R:2539239-2540988	-	1	Intronic	0.573	1.072
XLOC_011953	2RHet:1316442-1316788	-	2R:2545779-2546125	-	1	Intronic	-0.911	-0.234
XLOC_011955	2RHet:1319788-1320736	-	2R:2549125-2550073	-	1	Intronic	-0.285	0.262
XLOC_011956	2RHet:1324541-1325539	-	2R:2553878-2554876	-	1	Intronic	1.306	1.857
XLOC_011957	2RHet:1325875-1327209	-	2R:2555212-2556546	-	1	Intronic	1.782	2.311
XLOC_011958	2RHet:1327458-1328242	-	2R:2556795-2557579	-	1	Intronic	1.565	2.032
XLOC_011967	2RHet:1550675-1551392	-	2R:2775669-2776386	-	1	Intronic	1.171	2.075
XLOC_011968	2RHet:1551885-1553299	-	2R:2776879-2778293	-	1	Intronic	1.037	1.904
XLOC_011969	2RHet:1559645-1560090	-	2R:2784639-2785084	-	1	Intronic	0.185	1.107
XLOC_011970	2RHet:1560358-1560744	-	2R:2785352-2785738	-	1	Intronic	0.416	1.307
XLOC_011971	2RHet:1562864-1564916	-	2R:2787858-2789910	-	1	Intronic	0.833	1.584
XLOC_011972	2RHet:1565356-1565655	-	2R:2790350-2790649	-	1	Intronic	0.58	1.472
XLOC_011973	2RHet:1565908-1566677	-	2R:2790902-2791671	-	1	Intronic	0.832	1.566
XLOC_011974	2RHet:1567525-1568511	-	2R:2792519-2793505	-	1	Intronic	0.659	1.384
XLOC_011975	2RHet:1568566-1571392	-	2R:2793560-2796386	-	1	Intronic	1.4	2.176
XLOC_011976	2RHet:1576170-1576759	-	2R:2801164-2801753	-	1	Intronic	0.774	1.472
XLOC_011977	2RHet:1590552-1591609	-	2R:2815547-2816604	-	1	Intronic	2.276	2.993
XLOC_011978	2RHet:1595837-1605532	-	2R:2820832-2830527	-	1	Intronic	2.376	2.994
XLOC_011979	2RHet:1607236-1607966	-	2R:2832231-2832961	-	1	Intronic	1.428	2.118
XLOC_011980	2RHet:1614839-1615285	-	2R:2839873-2840319	-	1	Intronic	0.449	1.009
XLOC_011981	2RHet:1618075-1618744	-	2R:2843109-2843778	-	1	Intronic	1.929	2.453
XLOC_011982	2RHet:1618831-1619320	-	2R:2843865-2844354	-	1	Intronic	0.762	1.252
XLOC_011983	2RHet:1619410-1619795	-	2R:2844444-2844829	-	1	Intronic	1.552	2.002
XLOC_012010	2RHet:1955347-1956888	-	2R:3172285-3173826	-	1	Intronic	-4.928	1.05
XLOC_012071	2RHet:3096177-3134953	-	2R:3860019-3898795	-	12	Intergenic	-1.371	-0.325
XLOC_012076	2RHet:3137489-3137809	-	2R:3901331-3901651	-	1	Intronic	1.153	1.049
XLOC_012077	2RHet:3140211-3142319	-	2R:3904053-3906161	-	1	Intronic	0.497	1.031
XLOC_012078	2RHet:3142544-3142814	-	2R:3906386-3906656	-	1	Intronic	-0.599	0.507
XLOC_012079	2RHet:3143260-3144014	-	2R:3907102-3907856	-	1	Intronic	0.27	0.87
XLOC_012080	2RHet:3144364-3144602	-	2R:3908206-3908444	-	1	Intronic	-0.884	0.171
XLOC_012081	2RHet:3149849-3151739	-	2R:3913691-3915581	-	1	Intronic	0.967	1.576
XLOC_012082	2RHet:3153489-3154304	-	2R:3917331-3918146	-	1	Intronic	0.571	1.081
XLOC_012083	2RHet:3155594-3155863	-	2R:3919436-3919705	-	1	Intronic	0.14	1.215
XLOC_012084	2RHet:3156637-3157190	-	2R:3920479-3921032	-	1	Intronic	0.442	1.196
XLOC_012085	2RHet:3157534-3157809	-	2R:3921376-3921651	-	1	Intronic	0.643	1.515
XLOC_012086	2RHet:3159975-3160214	-	2R:3923817-3924056	-	1	Intronic	0.121	0.934
XLOC_012087	2RHet:3160933-3161075	-	2R:3924775-3924917	-	1	Intronic	-0.447	0.833
XLOC_012088	2RHet:3161348-3161520	-	2R:3925190-3925362	-	1	Intronic	0.778	1.696
XLOC_012089	2RHet:3161970-3168300	-	2R:3925812-3932142	-	1	Intronic	1.7	2.333
XLOC_012090	2RHet:3168402-3169086	-	2R:3932244-3932928	-	1	Intronic	1.824	2.453
XLOC_012091	2RHet:3169656-3170589	-	2R:3933498-3934431	-	1	Intronic	2.089	2.648
XLOC_012092	2RHet:3172756-3173708	-	2R:3936598-3937550	-	1	Intronic	2.154	2.722
XLOC_012093	2RHet:3174096-3174265	-	2R:3937938-3938107	-	1	Intronic	2.272	2.823
XLOC_012094	2RHet:3174456-3174708	-	2R:3938298-3938550	-	1	Intronic	3.095	2.882
XLOC_012095	2RHet:3175054-3176301	-	2R:3938896-3940143	-	1	Intronic	1.82	2.295
XLOC_012124	3L:136369-136747	+	3L:136369-136747	+	1	Intronic	1.555	2.383
XLOC_012125	3L:136830-138533	+	3L:136830-138533	+	1	Intronic	1.551	2.451
XLOC_012126	3L:138870-139370	+	3L:138870-139370	+	1	Intronic	1.447	2.144
XLOC_012127	3L:139794-140255	+	3L:139794-140255	+	1	Intronic	1.583	2.184
XLOC_012138	3L:298292-298541	+	3L:298292-298541	+	1	Intronic	-2.647	-0.94
XLOC_012151	3L:550292-550584	+	3L:550292-550584	+	1	Anti-Sense	-0.937	-0.149
XLOC_012152	3L:551230-551667	+	3L:551230-551667	+	1	Intronic	-0.523	0.142
XLOC_012154	3L:565833-568863	+	3L:565833-568863	+	1	Intronic	-1.415	-0.674
XLOC_012155	3L:572546-573055	+	3L:572546-573055	+	1	Intronic	0.624	0.452
XLOC_012199	3L:872257-872799	+	3L:872257-872799	+	1	Intronic	0.193	0.32
XLOC_012200	3L:875200-877233	+	3L:875200-877233	+	1	Intronic	0.394	0.478
XLOC_012201	3L:881906-882535	+	3L:881906-882535	+	1	Anti-Sense	-0.811	-0.492
XLOC_012210	3L:959977-960550	+	3L:959977-960550	+	1	Intronic	0.166	0.696
XLOC_012212	3L:968615-969511	+	3L:968615-969511	+	1	Intronic	-2.247	-0.693
XLOC_012214	3L:987836-988568	+	3L:987836-988568	+	1	Intronic	-3.02	-0.992
XLOC_012285	3L:1518845-1519279	+	3L:1518845-1519279	+	1	Intronic	-0.95	0.4
XLOC_012288	3L:1540959-1541396	+	3L:1540959-1541396	+	1	Intronic	2.429	2.84
XLOC_012292	3L:1577141-1582189	+	3L:1577141-1582189	+	1	Intronic	-1.3	-0.325
XLOC_012293	3L:1582290-1585961	+	3L:1582290-1585961	+	1	Intronic	-1.806	-0.734
XLOC_012294	3L:1589116-1589630	+	3L:1589116-1589630	+	1	Intronic	-1.272	-0.351
XLOC_012295	3L:1589804-1590412	+	3L:1589804-1590412	+	1	Intronic	-1.259	-0.3
XLOC_012296	3L:1590520-1590977	+	3L:1590520-1590977	+	1	Intronic	-1.495	-0.377
XLOC_012297	3L:1591234-1592335	+	3L:1591234-1592335	+	1	Intronic	-1.186	0.039
XLOC_012299	3L:1620559-1620732	+	3L:1620559-1620732	+	1	Intronic	1.623	2.262
XLOC_012312	3L:1742014-1743207	+	3L:1742014-1743207	+	1	Intronic	1.251	1.698
XLOC_012375	3L:2290256-2290791	+	3L:2290256-2290791	+	1	Intronic	-3.478	-0.692
XLOC_012376	3L:2291071-2292012	+	3L:2291071-2292012	+	1	Intronic	-2.711	-0.641
XLOC_012377	3L:2292161-2294950	+	3L:2292161-2294950	+	1	Intronic	-2.106	-0.538
XLOC_012389	3L:2391537-2396158	+	3L:2391537-2396158	+	1	Intronic	-0.804	0.07
XLOC_012390	3L:2415844-2417457	+	3L:2415844-2417457	+	1	Intronic	-1.35	-0.139
XLOC_012391	3L:2418406-2418892	+	3L:2418406-2418892	+	1	Intronic	-1.272	-0.524
XLOC_012392	3L:2419585-2422385	+	3L:2419585-2422385	+	1	Intronic	-1.061	-0.591
XLOC_012393	3L:2423025-2424712	+	3L:2423025-2424712	+	1	Intronic	-1.043	-0.486
XLOC_012394	3L:2429510-2431565	+	3L:2429510-2431565	+	1	Intronic	-0.233	0.53
XLOC_012395	3L:2446346-2446823	+	3L:2446346-2446823	+	1	Intronic	-1.15	-0.235
XLOC_012396	3L:2461582-2462182	+	3L:2461582-2462182	+	1	Intronic	0.432	1.289
XLOC_012397	3L:2485230-2486098	+	3L:2485230-2486098	+	1	Intronic	-0.371	0.119
XLOC_012438	3L:2900402-2902497	+	3L:2900402-2902497	+	1	Intronic	-2.104	-0.362
XLOC_012439	3L:2903970-2904231	+	3L:2903970-2904231	+	1	Intronic	-4.799	-0.851
XLOC_012440	3L:2905471-2906510	+	3L:2905471-2906510	+	1	Intronic	-3.369	-0.087
XLOC_012461	3L:3073629-3075075	+	3L:3073629-3075075	+	1	Intronic	-0.206	0.019
XLOC_012463	3L:3075581-3076519	+	3L:3075581-3076519	+	1	Intronic	-0.952	-0.66
XLOC_012464	3L:3079036-3079731	+	3L:3079036-3079731	+	1	Intronic	-0.95	-0.465
XLOC_012465	3L:3080544-3081044	+	3L:3080544-3081044	+	1	Intronic	-1.008	-0.509
XLOC_012466	3L:3084905-3085196	+	3L:3084905-3085196	+	1	Intronic	1.574	2.017
XLOC_012489	3L:3304872-3307336	+	3L:3304872-3307336	+	1	Intronic	-0.67	0.095
XLOC_012495	3L:3337878-3338299	+	3L:3337878-3338299	+	1	Intronic	0.963	1.424
XLOC_012496	3L:3339499-3339765	+	3L:3339499-3339765	+	1	Intronic	1.058	1.563
XLOC_012497	3L:3340499-3340826	+	3L:3340499-3340826	+	1	Intronic	0.84	1.281
XLOC_012498	3L:3341954-3342327	+	3L:3341954-3342327	+	1	Intronic	0.946	1.44
XLOC_012499	3L:3344341-3344517	+	3L:3344341-3344517	+	1	Intronic	1.138	1.669
XLOC_012500	3L:3351779-3351903	+	3L:3351779-3351903	+	1	Intronic	-2.579	-1.042
XLOC_012501	3L:3352473-3353375	+	3L:3352473-3353375	+	1	Intronic	0.457	0.9
XLOC_012524	3L:3494332-3495396	+	3L:3494332-3495396	+	1	Intronic	-2.677	-1.025
XLOC_012531	3L:3520947-3522345	+	3L:3520947-3522345	+	1	Intronic	-1.235	-0.561
XLOC_012532	3L:3522991-3526894	+	3L:3522991-3526894	+	1	Anti-Sense	-1.404	-0.742
XLOC_012533	3L:3527022-3528107	+	3L:3527022-3528107	+	1	Intronic	-1.882	-1.064
XLOC_012534	3L:3528372-3529052	+	3L:3528372-3529052	+	1	Intronic	-2.367	-1.083
XLOC_012535	3L:3529256-3529556	+	3L:3529256-3529556	+	1	Intronic	-3.334	-1.855
XLOC_012538	3L:3533846-3534302	+	3L:3533846-3534302	+	1	Intronic	-1.091	0.486
XLOC_012539	3L:3534561-3534860	+	3L:3534561-3534860	+	1	Intronic	-2.148	-0.362
XLOC_012540	3L:3535195-3535631	+	3L:3535195-3535631	+	1	Intronic	-1.951	-0.783
XLOC_012541	3L:3536883-3539308	+	3L:3536883-3539308	+	1	Intronic	-1.48	-0.791
XLOC_012542	3L:3539427-3540647	+	3L:3539427-3540647	+	1	Intronic	-1.555	-0.689
XLOC_012543	3L:3540924-3541455	+	3L:3540924-3541455	+	1	Intronic	-2.299	-0.894
XLOC_012545	3L:3548206-3551456	+	3L:3548206-3551456	+	1	Intronic	-1.65	-0.621
XLOC_012546	3L:3551832-3552065	+	3L:3551832-3552065	+	1	Intronic	-3.002	-1.299
XLOC_012547	3L:3552161-3552366	+	3L:3552161-3552366	+	1	Intronic	-3.137	-0.544
XLOC_012548	3L:3552926-3555483	+	3L:3552926-3555483	+	1	Intronic	-0.336	0.714
XLOC_012549	3L:3557498-3557832	+	3L:3557498-3557832	+	1	Intronic	-2.146	-0.071
XLOC_012550	3L:3561013-3561762	+	3L:3561013-3561762	+	1	Intronic	-0.388	0.681
XLOC_012551	3L:3562129-3563017	+	3L:3562129-3563017	+	1	Intronic	-0.648	0.487
XLOC_012552	3L:3563128-3563549	+	3L:3563128-3563549	+	1	Intronic	-0.847	0.557
XLOC_012553	3L:3564047-3564619	+	3L:3564047-3564619	+	1	Intronic	-0.746	0.466
XLOC_012554	3L:3564753-3564994	+	3L:3564753-3564994	+	1	Intronic	-0.262	1.088
XLOC_012555	3L:3565279-3565605	+	3L:3565279-3565605	+	1	Intronic	-0.754	0.69
XLOC_012556	3L:3565813-3566881	+	3L:3565813-3566881	+	1	Intronic	-0.442	0.665
XLOC_012557	3L:3569093-3569418	+	3L:3569093-3569418	+	1	Intronic	-1.177	0.645
XLOC_012558	3L:3578493-3579358	+	3L:3578493-3579358	+	1	Intronic	-0.704	0.358
XLOC_012559	3L:3579424-3581045	+	3L:3579424-3581045	+	1	Intronic	-0.539	0.441
XLOC_012560	3L:3581352-3582039	+	3L:3581352-3582039	+	1	Intronic	-0.633	0.414
XLOC_012561	3L:3582451-3582783	+	3L:3582451-3582783	+	1	Intronic	-0.956	0.337
XLOC_012562	3L:3582989-3583118	+	3L:3582989-3583118	+	1	Intronic	-1.294	0.961
XLOC_012563	3L:3583667-3584501	+	3L:3583667-3584501	+	1	Intronic	-0.51	0.52
XLOC_012564	3L:3585017-3585308	+	3L:3585017-3585308	+	1	Intronic	-1.372	0.258
XLOC_012565	3L:3586076-3586356	+	3L:3586076-3586356	+	1	Intronic	-1.793	-0.096
XLOC_012566	3L:3587254-3587502	+	3L:3587254-3587502	+	1	Intronic	-1.079	0.537
XLOC_012567	3L:3588825-3589332	+	3L:3588825-3589332	+	1	Intronic	-0.645	0.401
XLOC_012568	3L:3589678-3589944	+	3L:3589678-3589944	+	1	Intronic	-2.239	-0.162
XLOC_012569	3L:3590473-3590933	+	3L:3590473-3590933	+	1	Intronic	-1.094	0.021
XLOC_012570	3L:3594834-3595173	+	3L:3594834-3595173	+	1	Intronic	-1.688	-0.251
XLOC_012571	3L:3598903-3599963	+	3L:3598903-3599963	+	1	Intronic	-1.288	-0.296
XLOC_012572	3L:3600500-3601354	+	3L:3600500-3601354	+	1	Intronic	-0.045	0.88
XLOC_012573	3L:3606609-3607102	+	3L:3606609-3607102	+	1	Intronic	-0.699	0.387
XLOC_012574	3L:3607197-3607489	+	3L:3607197-3607489	+	1	Intronic	-1.133	0.62
XLOC_012600	3L:3825752-3828278	+	3L:3825752-3828278	+	1	Intronic	-0.406	0.694
XLOC_012601	3L:3835174-3835935	+	3L:3835174-3835935	+	1	Intronic	-1.871	-0.546
XLOC_012637	3L:4048437-4049284	+	3L:4048437-4049284	+	1	Intronic	-1.188	-0.235
XLOC_012638	3L:4050398-4051223	+	3L:4050398-4051223	+	1	Intronic	-1.337	0.849
XLOC_012660	3L:4205541-4206292	+	3L:4205541-4206292	+	1	Intronic	-2.11	-0.837
XLOC_012662	3L:4207621-4209875	+	3L:4207621-4209875	+	1	Anti-Sense	-1.923	-1.081
XLOC_012693	3L:4401558-4401841	+	3L:4401558-4401841	+	1	Intronic	-5.248	-0.178
XLOC_012695	3L:4414859-4417790	+	3L:4414859-4417790	+	1	Intronic	2.398	3.29
XLOC_012720	3L:4549070-4550035	+	3L:4549070-4550035	+	1	Intronic	-1.133	-0.317
XLOC_012722	3L:4580249-4581880	+	3L:4580249-4581880	+	1	Intronic	-2.189	-0.229
XLOC_012723	3L:4584572-4586533	+	3L:4584572-4586533	+	1	Intronic	-1.962	-0.088
XLOC_012724	3L:4586867-4587928	+	3L:4586867-4587928	+	1	Intronic	-2.277	-0.049
XLOC_012725	3L:4588361-4589363	+	3L:4588361-4589363	+	1	Intronic	-2.725	-0.488
XLOC_012756	3L:4911944-4912230	+	3L:4911944-4912230	+	1	Intronic	-2.191	0.529
XLOC_012830	3L:5652787-5653450	+	3L:5659687-5660350	+	1	Anti-Sense	-2.888	-0.388
XLOC_012837	3L:5672356-5673133	+	3L:5679256-5680033	+	1	Intronic	-2.603	-0.275
XLOC_012838	3L:5692129-5695061	+	3L:5699029-5701961	+	1	Intronic	-2.048	-0.267
XLOC_012839	3L:5695513-5696674	+	3L:5702413-5703574	+	1	Intronic	-2.193	-0.271
XLOC_012840	3L:5698416-5699348	+	3L:5705316-5706248	+	1	Intronic	-2.403	-0.143
XLOC_012841	3L:5699870-5700788	+	3L:5706770-5707688	+	1	Intronic	-2.631	-0.215
XLOC_012848	3L:5715687-5717642	+	3L:5722587-5724542	+	1	Intronic	-2.286	-0.425
XLOC_012849	3L:5717991-5719036	+	3L:5724891-5725936	+	1	Intronic	-2.974	-0.505
XLOC_012851	3L:5720688-5721262	+	3L:5727588-5728162	+	1	Intronic	-3.784	-0.606
XLOC_012868	3L:5917335-5917897	+	3L:5924235-5924797	+	1	Intronic	1.173	2.424
XLOC_012869	3L:5919609-5919836	+	3L:5926509-5926736	+	1	Intronic	0.459	1.832
XLOC_012900	3L:6190221-6190436	+	3L:6197121-6197336	+	1	Intronic	0.504	1.225
XLOC_012902	3L:6225023-6229801	+	3L:6231923-6236701	+	2	Anti-Sense	-0.603	-2.052
XLOC_012936	3L:6489736-6490034	+	3L:6496636-6496934	+	1	Intronic	-0.645	0.213
XLOC_012937	3L:6491980-6492390	+	3L:6498880-6499290	+	1	Intronic	-0.953	-0.065
XLOC_012938	3L:6492997-6493771	+	3L:6499897-6500671	+	1	Intronic	-0.523	0.158
XLOC_012939	3L:6496759-6497640	+	3L:6503659-6504540	+	1	Intronic	-0.764	-0.004
XLOC_012941	3L:6504803-6506338	+	3L:6511703-6513238	+	1	Intronic	-0.841	-0.027
XLOC_012942	3L:6506528-6507399	+	3L:6513428-6514299	+	1	Intronic	-0.598	-0.061
XLOC_012943	3L:6507468-6509987	+	3L:6514368-6516887	+	1	Intronic	-1.034	-0.244
XLOC_012944	3L:6511934-6513256	+	3L:6518834-6520156	+	1	Intronic	-1.331	-0.404
XLOC_012945	3L:6513337-6513663	+	3L:6520237-6520563	+	1	Intronic	-2.539	-1.01
XLOC_012946	3L:6520206-6521902	+	3L:6527106-6528802	+	1	Intronic	-1.165	-0.22
XLOC_012948	3L:6525973-6526428	+	3L:6532873-6533328	+	1	Intronic	-2.52	-1.06
XLOC_012949	3L:6527854-6530633	+	3L:6534754-6537533	+	1	Intronic	-1.141	-0.372
XLOC_012950	3L:6530694-6531648	+	3L:6537594-6538548	+	1	Intronic	-1.972	-1.029
XLOC_012954	3L:6539459-6540346	+	3L:6546359-6547246	+	1	Intronic	0.193	1.053
XLOC_012956	3L:6545920-6547747	+	3L:6552820-6554647	+	1	Intronic	-1.254	-0.746
XLOC_012957	3L:6548161-6548963	+	3L:6555061-6555863	+	1	Intronic	-1.657	-1.207
XLOC_012958	3L:6549499-6551871	+	3L:6556399-6558771	+	1	Intronic	-1.617	-1.145
XLOC_012959	3L:6552053-6552662	+	3L:6558953-6559562	+	1	Intronic	-2.088	-1.323
XLOC_012960	3L:6552972-6555374	+	3L:6559872-6562274	+	1	Intronic	-1.707	-1.318
XLOC_012961	3L:6562758-6564588	+	3L:6569658-6571488	+	1	Anti-Sense	-1.972	-0.823
XLOC_012962	3L:6564832-6566208	+	3L:6571732-6573108	+	1	Anti-Sense	-2.033	-0.832
XLOC_012963	3L:6566306-6576480	+	3L:6573206-6583380	+	1	Intronic	-1.829	-0.823
XLOC_012964	3L:6576886-6579099	+	3L:6583786-6585999	+	1	Anti-Sense	-1.785	-0.918
XLOC_012969	3L:6606930-6608832	+	3L:6613830-6615732	+	1	Intronic	-1.406	-0.099
XLOC_013047	3L:7009583-7010285	+	3L:7016483-7017185	+	1	Intronic	-0.812	-0.556
XLOC_013052	3L:7043838-7044326	+	3L:7050738-7051226	+	1	Intronic	-2.377	-1.609
XLOC_013106	3L:7419568-7420064	+	3L:7426468-7426964	+	1	Intronic	-1.383	0.942
XLOC_013107	3L:7423638-7424436	+	3L:7430538-7431336	+	1	Intronic	-3.63	1.006
XLOC_013123	3L:7506754-7506905	+	3L:7513654-7513805	+	1	Intronic	-1.489	1.743
XLOC_013138	3L:7604832-7606247	+	3L:7611732-7613147	+	1	Intronic	-2.23	-0.914
XLOC_013141	3L:7613629-7616594	+	3L:7620529-7623494	+	1	Intronic	-2.063	-0.841
XLOC_013142	3L:7619207-7620220	+	3L:7626107-7627120	+	1	Intronic	-2.609	-0.902
XLOC_013182	3L:7974100-7978522	+	3L:7981000-7985422	+	1	Intronic	-1.354	-0.828
XLOC_013183	3L:7980792-7985009	+	3L:7987692-7991909	+	1	Intronic	-1.537	-0.978
XLOC_013208	3L:8078187-8083537	+	3L:8085087-8090437	+	1	Anti-Sense	0.233	0.76
XLOC_013209	3L:8085171-8086100	+	3L:8092071-8093000	+	1	Intronic	-0.77	-0.146
XLOC_013210	3L:8086999-8089544	+	3L:8093899-8096444	+	1	Intronic	-1.083	-0.541
XLOC_013211	3L:8094401-8094598	+	3L:8101301-8101498	+	1	Intronic	2.73	4.003
XLOC_013234	3L:8306908-8307874	+	3L:8313808-8314774	+	1	Anti-Sense	-4.432	0.761
XLOC_013254	3L:8419147-8419404	+	3L:8426047-8426304	+	1	Intronic	-0.46	0.017
XLOC_013257	3L:8445291-8446216	+	3L:8452191-8453116	+	1	Intronic	-1.407	-0.793
XLOC_013258	3L:8446394-8447905	+	3L:8453294-8454805	+	1	Intronic	-1.209	-0.582
XLOC_013259	3L:8448350-8451394	+	3L:8455250-8458294	+	1	Intronic	-1.055	-0.502
XLOC_013260	3L:8451726-8453683	+	3L:8458626-8460583	+	1	Intronic	-1.455	-0.754
XLOC_013261	3L:8463607-8463852	+	3L:8470507-8470752	+	1	Intronic	-0.296	0.965
XLOC_013267	3L:8538196-8539662	+	3L:8545096-8546562	+	1	Intronic	0.044	0.749
XLOC_013268	3L:8539980-8544642	+	3L:8546880-8551542	+	1	Intronic	0.57	1.214
XLOC_013269	3L:8544792-8545115	+	3L:8551692-8552015	+	1	Intronic	-0.115	0.693
XLOC_013270	3L:8545183-8546676	+	3L:8552083-8553576	+	1	Intronic	0.03	0.752
XLOC_013271	3L:8546905-8547743	+	3L:8553805-8554643	+	1	Intronic	-0.152	0.49
XLOC_013272	3L:8548214-8548504	+	3L:8555114-8555404	+	1	Intronic	-2.641	-0.876
XLOC_013273	3L:8548585-8548828	+	3L:8555485-8555728	+	1	Intronic	-1.178	0.146
XLOC_013277	3L:8598140-8600024	+	3L:8605040-8606924	+	1	Intronic	-1.369	0.298
XLOC_013279	3L:8628242-8628366	+	3L:8635142-8635266	+	1	Intronic	4.487	5.358
XLOC_013302	3L:8770723-8770858	+	3L:8777623-8777758	+	1	Intronic	-1.757	0.155
XLOC_013303	3L:8771325-8771851	+	3L:8778225-8778751	+	1	Intronic	-0.142	0.802
XLOC_013304	3L:8771982-8772197	+	3L:8778882-8779097	+	1	Intronic	-2.018	-0.179
XLOC_013305	3L:8772255-8772633	+	3L:8779155-8779533	+	1	Intronic	-1.043	0.228
XLOC_013306	3L:8773171-8773795	+	3L:8780071-8780695	+	1	Intronic	-0.991	0.196
XLOC_013307	3L:8773869-8774104	+	3L:8780769-8781004	+	1	Intronic	-1.569	0.122
XLOC_013308	3L:8775898-8777442	+	3L:8782798-8784342	+	1	Intronic	-0.687	0.245
XLOC_013321	3L:8843865-8844136	+	3L:8850765-8851036	+	1	Intronic	1.099	2.024
XLOC_013328	3L:8907147-8907617	+	3L:8914047-8914517	+	1	Intronic	-1.938	-1.016
XLOC_013330	3L:8910527-8910820	+	3L:8917427-8917720	+	1	Intronic	-3.163	-1.608
XLOC_013331	3L:8911403-8911774	+	3L:8918303-8918674	+	1	Intronic	-2.296	-0.844
XLOC_013333	3L:8912677-8912969	+	3L:8919577-8919869	+	1	Intronic	-3.679	-1.94
XLOC_013334	3L:8913565-8914978	+	3L:8920465-8921878	+	1	Intronic	-2.009	-1.149
XLOC_013336	3L:8919905-8921115	+	3L:8926805-8928015	+	1	Intronic	-0.237	0.094
XLOC_013362	3L:9131124-9131647	+	3L:9138024-9138547	+	1	Intronic	-2.333	-0.131
XLOC_013407	3L:9424989-9426389	+	3L:9431889-9433289	+	1	Intronic	0.069	0.051
XLOC_013423	3L:9543472-9544370	+	3L:9550372-9551270	+	1	Intronic	-0.413	-0.561
XLOC_013424	3L:9545078-9545331	+	3L:9551978-9552231	+	1	Intronic	-1.616	-1.537
XLOC_013425	3L:9554711-9559075	+	3L:9561611-9565975	+	1	Intronic	-1.348	-1.384
XLOC_013427	3L:9561545-9563060	+	3L:9568445-9569960	+	1	Intronic	-1.433	-0.594
XLOC_013428	3L:9563211-9565020	+	3L:9570111-9571920	+	1	Intronic	-1.43	-1.281
XLOC_013429	3L:9565500-9568106	+	3L:9572400-9575006	+	1	Intronic	-1.659	-1.593
XLOC_013430	3L:9574204-9574423	+	3L:9581104-9581323	+	1	Intronic	-0.961	-1.408
XLOC_013431	3L:9584892-9585098	+	3L:9591792-9591998	+	1	Intronic	-3.489	-1.622
XLOC_013444	3L:9686787-9687044	+	3L:9693687-9693944	+	1	Intronic	-7.24	-0.063
XLOC_013457	3L:9770881-9772446	+	3L:9777781-9779346	+	1	Intronic	-1.263	-0.456
XLOC_013466	3L:9858563-9859130	+	3L:9865463-9866030	+	1	Intronic	0.28	0.543
XLOC_013467	3L:9859466-9860413	+	3L:9866366-9867313	+	1	Intronic	3.779	3.956
XLOC_013468	3L:9860856-9861331	+	3L:9867756-9868231	+	1	Intronic	3.788	3.923
XLOC_013476	3L:9971936-9972378	+	3L:9978836-9979278	+	1	Intronic	-4.477	0.596
XLOC_013530	3L:10334556-10334889	+	3L:10341456-10341789	+	1	Intergenic	-1.132	0.76
XLOC_013531	3L:10335435-10337307	+	3L:10342335-10344207	+	1	Intergenic	-0.821	0.487
XLOC_013532	3L:10337408-10339445	+	3L:10344308-10346345	+	1	Intergenic	-0.76	0.547
XLOC_013574	3L:10517809-10527579	+	3L:10524709-10534479	+	1	Intronic	-1.006	0.09
XLOC_013575	3L:10539070-10540189	+	3L:10545970-10547089	+	1	Intronic	-1.788	-0.386
XLOC_013576	3L:10544907-10545605	+	3L:10551807-10552505	+	1	Intronic	-1.967	-0.296
XLOC_013577	3L:10545895-10547232	+	3L:10552795-10554132	+	1	Intronic	-1.5	-0.272
XLOC_013578	3L:10562643-10563837	+	3L:10569543-10570737	+	1	Intronic	-1.212	-0.062
XLOC_013579	3L:10564392-10565361	+	3L:10571292-10572261	+	1	Intronic	-1.377	0.017
XLOC_013580	3L:10567802-10568290	+	3L:10574702-10575190	+	1	Intronic	-2.278	-0.052
XLOC_013592	3L:10679381-10679709	+	3L:10686281-10686609	+	1	Intronic	-1.012	-0.062
XLOC_013651	3L:10852905-10859380	+	3L:10859805-10866280	+	1	Intronic	0.001	1.18
XLOC_013688	3L:11213026-11215190	+	3L:11219926-11222090	+	1	Intronic	-1.052	-0.318
XLOC_013689	3L:11215323-11215662	+	3L:11222223-11222562	+	1	Intronic	-2.969	-1.47
XLOC_013690	3L:11219904-11220752	+	3L:11226804-11227652	+	1	Intronic	0.714	1.613
XLOC_013765	3L:11683413-11683975	+	3L:11690313-11690875	+	1	Intronic	0.627	0.505
XLOC_013856	3L:12402507-12405094	+	3L:12409407-12411994	+	1	Intronic	-1.061	-0.188
XLOC_013857	3L:12405559-12406013	+	3L:12412459-12412913	+	1	Intronic	-2.707	-0.941
XLOC_013858	3L:12407931-12410779	+	3L:12414831-12417679	+	1	Anti-Sense	-4.144	0.265
XLOC_013877	3L:12510163-12510492	+	3L:12517063-12517392	+	1	Intronic	1.959	2.252
XLOC_014011	3L:13222730-13224029	+	3L:13229630-13230929	+	1	Intronic	1.091	1.747
XLOC_014012	3L:13224512-13225056	+	3L:13231412-13231956	+	1	Intronic	1.114	1.886
XLOC_014013	3L:13225236-13225452	+	3L:13232136-13232352	+	1	Intronic	1.214	1.908
XLOC_014014	3L:13225964-13226300	+	3L:13232864-13233200	+	1	Intronic	1.161	1.891
XLOC_014015	3L:13226551-13227535	+	3L:13233451-13234435	+	1	Intronic	0.684	1.424
XLOC_014016	3L:13232066-13232426	+	3L:13238966-13239326	+	1	Intronic	1.036	1.848
XLOC_014017	3L:13233174-13233533	+	3L:13240074-13240433	+	1	Intronic	0.891	1.81
XLOC_014018	3L:13233749-13233952	+	3L:13240649-13240852	+	1	Intronic	1.079	1.966
XLOC_014019	3L:13234400-13234524	+	3L:13241300-13241424	+	1	Intronic	-1.624	0.11
XLOC_014020	3L:13239536-13239734	+	3L:13246436-13246634	+	1	Intronic	-2.13	-0.74
XLOC_014021	3L:13244312-13246502	+	3L:13251212-13253402	+	1	Intronic	0.556	1.316
XLOC_014022	3L:13246635-13247484	+	3L:13253535-13254384	+	1	Intronic	0.445	1.265
XLOC_014023	3L:13247579-13248960	+	3L:13254479-13255860	+	1	Intronic	0.204	0.944
XLOC_014024	3L:13249589-13249845	+	3L:13256489-13256745	+	1	Intronic	-0.145	0.846
XLOC_014025	3L:13250406-13250739	+	3L:13257306-13257639	+	1	Intronic	0.303	1.169
XLOC_014026	3L:13251530-13251871	+	3L:13258430-13258771	+	1	Intronic	0.204	1.144
XLOC_014027	3L:13252031-13252410	+	3L:13258931-13259310	+	1	Intronic	0.573	1.441
XLOC_014028	3L:13252568-13253059	+	3L:13259468-13259959	+	1	Intronic	0.26	1.122
XLOC_014029	3L:13253336-13253538	+	3L:13260236-13260438	+	1	Intronic	-0.113	0.85
XLOC_014030	3L:13253624-13253835	+	3L:13260524-13260735	+	1	Intronic	0.135	1.239
XLOC_014031	3L:13258844-13259134	+	3L:13265744-13266034	+	1	Intronic	-0.034	1.069
XLOC_014065	3L:13489266-13490848	+	3L:13496166-13497748	+	1	Intronic	0.274	-0.371
XLOC_014089	3L:13947833-13950504	+	3L:13954733-13957404	+	1	Intronic	-1.458	-0.805
XLOC_014090	3L:13950748-13952552	+	3L:13957648-13959452	+	1	Intronic	-1.912	-1.099
XLOC_014091	3L:13953335-13953516	+	3L:13960235-13960416	+	1	Intronic	-2.947	-1.731
XLOC_014097	3L:14002891-14003009	+	3L:14009791-14009909	+	1	Intronic	-2.05	-0.673
XLOC_014099	3L:14030865-14031123	+	3L:14037765-14038023	+	1	Intronic	0.962	0.698
XLOC_014100	3L:14031295-14031580	+	3L:14038195-14038480	+	1	Intronic	1.643	1.657
XLOC_014103	3L:14052633-14052757	+	3L:14059533-14059657	+	1	Intronic	-3.64	-1.373
XLOC_014104	3L:14057190-14057847	+	3L:14064090-14064747	+	1	Intronic	-2.452	-1.13
XLOC_014105	3L:14058337-14058631	+	3L:14065237-14065531	+	1	Intronic	-0.508	0.739
XLOC_014133	3L:14187395-14187850	+	3L:14194295-14194750	+	1	Intronic	-0.635	-0.28
XLOC_014134	3L:14188169-14192006	+	3L:14195069-14198906	+	1	Intronic	-0.631	-0.384
XLOC_014135	3L:14192114-14192829	+	3L:14199014-14199729	+	1	Intronic	-0.893	-0.528
XLOC_014136	3L:14205382-14205744	+	3L:14212282-14212644	+	1	Intronic	-1.964	-0.933
XLOC_014137	3L:14220043-14221290	+	3L:14226943-14228190	+	1	Intronic	0.263	1.255
XLOC_014148	3L:14326364-14326727	+	3L:14333264-14333627	+	1	Intronic	-2.896	0.43
XLOC_014175	3L:14616152-14616519	+	3L:14623052-14623419	+	1	Intronic	1.159	2.297
XLOC_014176	3L:14616789-14617103	+	3L:14623689-14624003	+	1	Intronic	0.71	2.031
XLOC_014184	3L:14637894-14640706	+	3L:14644794-14647606	+	1	Intronic	-1.763	-1.32
XLOC_014185	3L:14640834-14646700	+	3L:14647734-14653600	+	1	Intronic	-1.618	-1.284
XLOC_014197	3L:14700269-14702275	+	3L:14707169-14709175	+	1	Intronic	0.702	1.401
XLOC_014198	3L:14702905-14705095	+	3L:14709805-14711995	+	1	Intronic	-0.047	0.696
XLOC_014199	3L:14705277-14705974	+	3L:14712177-14712874	+	1	Intronic	-0.233	0.536
XLOC_014200	3L:14706333-14710485	+	3L:14713233-14717385	+	1	Intronic	-0.14	0.586
XLOC_014201	3L:14710564-14713787	+	3L:14717464-14720687	+	1	Intronic	-0.361	0.317
XLOC_014202	3L:14713930-14714341	+	3L:14720830-14721241	+	1	Intronic	-1.245	0.045
XLOC_014203	3L:14716121-14716808	+	3L:14723021-14723708	+	1	Intronic	-0.598	0.211
XLOC_014204	3L:14716809-14717736	+	3L:14723709-14724636	+	1	Intronic	-0.694	0.086
XLOC_014205	3L:14717908-14718462	+	3L:14724808-14725362	+	1	Intronic	-0.43	0.446
XLOC_014207	3L:14723707-14723977	+	3L:14730607-14730877	+	1	Intronic	-1.496	-0.176
XLOC_014209	3L:14726880-14727488	+	3L:14733780-14734388	+	1	Intronic	-1.546	-0.654
XLOC_014210	3L:14733664-14733976	+	3L:14740564-14740876	+	1	Intronic	-2.464	-0.566
XLOC_014215	3L:14833816-14834055	+	3L:14840716-14840955	+	1	Intronic	1.08	2.77
XLOC_014238	3L:14978471-14980479	+	3L:14985371-14987379	+	1	Intronic	-1.614	-1.083
XLOC_014256	3L:15142753-15143413	+	3L:15149653-15150313	+	1	Intronic	-3.061	-0.768
XLOC_014368	3L:15531262-15534102	+	3L:15538162-15541002	+	1	Intronic	-0.193	0.169
XLOC_014369	3L:15534525-15534773	+	3L:15541425-15541673	+	1	Intronic	-1.144	-0.545
XLOC_014370	3L:15535004-15537413	+	3L:15541904-15544313	+	1	Intronic	-0.904	-0.528
XLOC_014371	3L:15537489-15538755	+	3L:15544389-15545655	+	1	Intronic	-1.196	-0.709
XLOC_014372	3L:15539087-15540609	+	3L:15545987-15547509	+	1	Intronic	-1.325	-0.878
XLOC_014380	3L:15591749-15592112	+	3L:15598649-15599012	+	1	Intronic	-1.481	-0.764
XLOC_014381	3L:15592799-15593211	+	3L:15599699-15600111	+	1	Intronic	-2.243	-1.405
XLOC_014458	3L:16046678-16047129	+	3L:16053578-16054029	+	1	Intronic	-0.878	0.316
XLOC_014459	3L:16047200-16048128	+	3L:16054100-16055028	+	1	Intronic	-0.456	0.404
XLOC_014460	3L:16048209-16048573	+	3L:16055109-16055473	+	1	Intronic	-1.081	0.251
XLOC_014461	3L:16048732-16051849	+	3L:16055632-16058749	+	1	Intronic	-0.673	0.171
XLOC_014462	3L:16051992-16053251	+	3L:16058892-16060151	+	1	Intronic	-1.156	-0.156
XLOC_014464	3L:16062824-16063218	+	3L:16069724-16070118	+	1	Intronic	-0.078	0.857
XLOC_014573	3L:16860049-16860895	+	3L:16866949-16867795	+	1	Intronic	-0.086	0.681
XLOC_014574	3L:16861023-16863379	+	3L:16867923-16870279	+	1	Intronic	-0.514	0.267
XLOC_014575	3L:16863709-16864238	+	3L:16870609-16871138	+	1	Intronic	-0.912	0.08
XLOC_014576	3L:16864543-16865103	+	3L:16871443-16872003	+	1	Intronic	-1.417	-0.167
XLOC_014578	3L:16900553-16900791	+	3L:16907453-16907691	+	1	Intronic	-1.305	0.345
XLOC_014579	3L:16901796-16902195	+	3L:16908696-16909095	+	1	Intronic	-1.277	0.141
XLOC_014580	3L:16902721-16903045	+	3L:16909621-16909945	+	1	Intronic	-1.956	-0.178
XLOC_014581	3L:16903283-16904219	+	3L:16910183-16911119	+	1	Intronic	-1.781	-0.536
XLOC_014582	3L:16911695-16912553	+	3L:16918595-16919453	+	1	Intronic	1.889	2.968
XLOC_014586	3L:16950680-16951266	+	3L:16957580-16958166	+	1	Intronic	2.847	3.965
XLOC_014588	3L:16965504-16967540	+	3L:16972404-16974440	+	1	Intronic	-1.365	-1.449
XLOC_014589	3L:16978891-16979302	+	3L:16985791-16986202	+	1	Intronic	-1.984	-0.517
XLOC_014590	3L:16979838-16981233	+	3L:16986738-16988133	+	1	Intronic	-0.942	-0.085
XLOC_014591	3L:16981458-16982381	+	3L:16988358-16989281	+	1	Intronic	-0.675	0.391
XLOC_014597	3L:17045278-17045511	+	3L:17052178-17052411	+	1	Intronic	1.508	2.041
XLOC_014598	3L:17046396-17047320	+	3L:17053296-17054220	+	1	Intronic	0.306	0.906
XLOC_014680	3L:17393311-17394445	+	3L:17400211-17401345	+	1	Anti-Sense	0.084	1.325
XLOC_014691	3L:17468369-17468509	+	3L:17475269-17475409	+	1	Intronic	6.136	7.976
XLOC_014694	3L:17494588-17495318	+	3L:17501488-17502218	+	1	Intronic	-0.568	-0.317
XLOC_014695	3L:17495528-17496529	+	3L:17502428-17503429	+	1	Intronic	-1.147	-0.989
XLOC_014696	3L:17496737-17497239	+	3L:17503637-17504139	+	1	Intronic	-1.231	-1.075
XLOC_014697	3L:17497878-17498238	+	3L:17504778-17505138	+	1	Intronic	-2.139	-1.684
XLOC_014698	3L:17498376-17499082	+	3L:17505276-17505982	+	1	Intronic	-1.209	-1.06
XLOC_014702	3L:17523531-17523877	+	3L:17530431-17530777	+	1	Intronic	1.025	-0.078
XLOC_014703	3L:17528208-17529397	+	3L:17535108-17536297	+	1	Intronic	-0.376	0.249
XLOC_014704	3L:17529609-17530159	+	3L:17536509-17537059	+	1	Intronic	-0.5	0.266
XLOC_014705	3L:17530605-17531650	+	3L:17537505-17538550	+	1	Intronic	-0.796	-0.151
XLOC_014706	3L:17532837-17533764	+	3L:17539737-17540664	+	1	Intronic	1.564	2.286
XLOC_014709	3L:17615607-17616875	+	3L:17622507-17623775	+	1	Intronic	-0.425	0.186
XLOC_014710	3L:17617060-17617414	+	3L:17623960-17624314	+	1	Intronic	-0.608	0.474
XLOC_014711	3L:17617719-17618330	+	3L:17624619-17625230	+	1	Intronic	-1.075	-0.14
XLOC_014713	3L:17622573-17622844	+	3L:17629473-17629744	+	1	Intronic	0.009	1.54
XLOC_014736	3L:17872524-17872968	+	3L:17879424-17879868	+	1	Intronic	-1.498	0.128
XLOC_014857	3L:18620946-18621365	+	3L:18627846-18628265	+	1	Intronic	-1.129	-0.427
XLOC_014858	3L:18622294-18625326	+	3L:18629194-18632226	+	1	Intronic	-0.93	-0.467
XLOC_014859	3L:18625433-18626216	+	3L:18632333-18633116	+	1	Intronic	-1.726	-1.152
XLOC_014860	3L:18626620-18630066	+	3L:18633520-18636966	+	1	Intronic	-1.403	-0.918
XLOC_014861	3L:18630174-18632654	+	3L:18637074-18639554	+	1	Intronic	-1.107	-0.556
XLOC_014862	3L:18632721-18634137	+	3L:18639621-18641037	+	1	Intronic	-0.937	-0.433
XLOC_014863	3L:18637639-18640847	+	3L:18644539-18647747	+	1	Intronic	-0.627	0.24
XLOC_014864	3L:18641195-18641629	+	3L:18648095-18648529	+	1	Intronic	-2.099	-0.954
XLOC_014865	3L:18641701-18642296	+	3L:18648601-18649196	+	1	Intronic	-1.569	-0.699
XLOC_014869	3L:18646234-18646945	+	3L:18653134-18653845	+	1	Intronic	-0.566	0.049
XLOC_014870	3L:18647196-18649444	+	3L:18654096-18656344	+	1	Intronic	-0.752	0.025
XLOC_014871	3L:18649799-18650449	+	3L:18656699-18657349	+	1	Intronic	-1.047	-0.068
XLOC_014979	3L:19850818-19851192	+	3L:19857718-19858092	+	1	Intronic	-0.829	-1.403
XLOC_014983	3L:19865635-19866359	+	3L:19872535-19873259	+	1	Intronic	-0.346	0.131
XLOC_014984	3L:19870734-19871927	+	3L:19877634-19878827	+	1	Intronic	-0.119	0.756
XLOC_014992	3L:19945188-19945928	+	3L:19952088-19952828	+	1	Anti-Sense	-1.954	0.049
XLOC_014993	3L:19946093-19947693	+	3L:19952993-19954593	+	1	Anti-Sense	-1.402	0.215
XLOC_014994	3L:19947900-19949087	+	3L:19954800-19955987	+	1	Anti-Sense	-1.854	-0.304
XLOC_014995	3L:19949259-19949469	+	3L:19956159-19956369	+	1	Intronic	-4.077	-1.262
XLOC_014998	3L:19958143-19958817	+	3L:19965043-19965717	+	1	Intronic	-0.599	0.673
XLOC_014999	3L:19960206-19960971	+	3L:19967106-19967871	+	1	Intronic	-1.557	-0.223
XLOC_015000	3L:19961113-19961692	+	3L:19968013-19968592	+	1	Intronic	-1.967	-0.215
XLOC_015001	3L:19965141-19965640	+	3L:19972041-19972540	+	1	Intronic	-2.695	-0.8
XLOC_015029	3L:20245475-20248689	+	3L:20252375-20255589	+	1	Intronic	-2.242	-0.585
XLOC_015035	3L:20343112-20343370	+	3L:20350012-20350270	+	1	Intronic	0.275	0.153
XLOC_015037	3L:20374395-20374646	+	3L:20381295-20381546	+	1	Intronic	2.714	2.795
XLOC_015046	3L:20440033-20441334	+	3L:20446933-20448234	+	1	Intronic	0.276	1.114
XLOC_015050	3L:20477456-20479324	+	3L:20484356-20486224	+	1	Anti-Sense	-0.711	-0.133
XLOC_015053	3L:20495516-20496783	+	3L:20502416-20503683	+	1	Intronic	0.023	0.57
XLOC_015103	3L:20810678-20810963	+	3L:20817578-20817863	+	1	Anti-Sense	0.641	1.634
XLOC_015105	3L:20821540-20822257	+	3L:20828440-20829157	+	1	Intronic	0.743	1.778
XLOC_015106	3L:20822672-20825404	+	3L:20829572-20832304	+	1	Intronic	0.384	1.445
XLOC_015146	3L:21064179-21064919	+	3L:21071079-21071819	+	1	Intronic	-1.435	-0.333
XLOC_015154	3L:21234517-21235525	+	3L:21241417-21242425	+	1	Intronic	-1.921	-0.479
XLOC_015163	3L:21376866-21378950	+	3L:21383766-21385850	+	1	Intronic	-0.218	-0.178
XLOC_015164	3L:21379045-21379468	+	3L:21385945-21386368	+	1	Intronic	-1.591	-1.304
XLOC_015165	3L:21385398-21391217	+	3L:21392298-21398117	+	1	Intronic	0.332	0.514
XLOC_015167	3L:21394858-21397510	+	3L:21401758-21404410	+	1	Intronic	-0.391	-0.16
XLOC_015168	3L:21397616-21398214	+	3L:21404516-21405114	+	1	Intronic	-0.665	-0.176
XLOC_015169	3L:21398628-21399957	+	3L:21405528-21406857	+	1	Anti-Sense	-1.078	-0.827
XLOC_015170	3L:21400199-21400865	+	3L:21407099-21407765	+	1	Intronic	-1.353	-1.177
XLOC_015171	3L:21401574-21402224	+	3L:21408474-21409124	+	1	Intronic	-1.485	-1.161
XLOC_015172	3L:21403555-21403899	+	3L:21410455-21410799	+	1	Intronic	-1.871	-1.888
XLOC_015174	3L:21409113-21409454	+	3L:21416013-21416354	+	1	Intronic	-0.624	-0.203
XLOC_015175	3L:21409623-21410214	+	3L:21416523-21417114	+	1	Intronic	-0.858	-0.541
XLOC_015176	3L:21410473-21410757	+	3L:21417373-21417657	+	1	Intronic	-1.497	-0.987
XLOC_015177	3L:21411837-21412172	+	3L:21418737-21419072	+	1	Intronic	-1.747	-1.142
XLOC_015214	3L:21611095-21611369	+	3L:21617995-21618269	+	1	Intronic	-2.257	-1.767
XLOC_015248	3L:21873383-21873662	+	3L:21880283-21880562	+	1	Intronic	1.056	1.984
XLOC_015249	3L:21882030-21886094	+	3L:21888930-21892994	+	1	Intronic	0.989	2.092
XLOC_015250	3L:21886161-21888512	+	3L:21893061-21895412	+	1	Intronic	0.581	1.662
XLOC_015251	3L:21888569-21890873	+	3L:21895469-21897773	+	1	Intronic	0.451	1.543
XLOC_015252	3L:21891048-21891359	+	3L:21897948-21898259	+	1	Intronic	0.188	1.465
XLOC_015253	3L:21895030-21895257	+	3L:21901930-21902157	+	1	Intronic	0.142	1.489
XLOC_015254	3L:21896456-21896722	+	3L:21903356-21903622	+	1	Intronic	-0.311	1.207
XLOC_015255	3L:21908852-21909663	+	3L:21915752-21916563	+	1	Intronic	-0.491	0.867
XLOC_015256	3L:21909859-21910434	+	3L:21916759-21917334	+	1	Intronic	-2.416	-0.361
XLOC_015300	3L:22261215-22261430	+	3L:22268115-22268330	+	1	Intronic	0.996	1.833
XLOC_015301	3L:22263070-22263469	+	3L:22269970-22270369	+	1	Intronic	0.642	0.436
XLOC_015334	3L:22772062-22772405	+	3L:22778962-22779305	+	1	Intronic	-0.269	1.023
XLOC_015342	3L:22882879-22883154	+	3L:22889779-22890054	+	1	Intronic	1.915	1.119
XLOC_015362	3L:23000841-23003526	+	3L:23007741-23010426	+	1	Intronic	-0.223	1.063
XLOC_015363	3L:23004955-23005426	+	3L:23011855-23012326	+	1	Intronic	-1.455	0.351
XLOC_015364	3L:23009408-23009764	+	3L:23016308-23016664	+	1	Intronic	-3.058	-0.681
XLOC_015365	3L:23015226-23016245	+	3L:23022126-23023145	+	1	Intronic	-0.861	0.674
XLOC_015366	3L:23021507-23022055	+	3L:23028407-23028955	+	1	Intronic	-0.869	0.577
XLOC_015378	3L:23092848-23093216	+	3L:23099748-23100116	+	1	Intronic	3.087	2.806
XLOC_015384	3L:23120953-23121165	+	3L:23127853-23128065	+	1	Intronic	0.466	-0.28
XLOC_015385	3L:23121620-23122718	+	3L:23128520-23129618	+	1	Intronic	0.604	-0.203
XLOC_015396	3L:23200415-23201210	+	3L:23207315-23208110	+	1	Intronic	-0.852	-0.537
XLOC_015397	3L:23202441-23202729	+	3L:23209341-23209629	+	1	Intronic	-1.85	-1.525
XLOC_015398	3L:23205768-23207915	+	3L:23212668-23214815	+	1	Intronic	-1.373	-0.847
XLOC_015399	3L:23208192-23208994	+	3L:23215092-23215894	+	1	Intronic	-1.713	-1.102
XLOC_015400	3L:23209232-23213024	+	3L:23216132-23219924	+	1	Intronic	-0.701	-0.011
XLOC_015401	3L:23213315-23214478	+	3L:23220215-23221378	+	1	Intronic	-1.004	0.039
XLOC_015402	3L:23217375-23218869	+	3L:23224275-23225769	+	1	Intronic	-1.233	-0.551
XLOC_015403	3L:23219128-23219422	+	3L:23226028-23226322	+	1	Intronic	-3.004	-1.708
XLOC_015404	3L:23228003-23228768	+	3L:23234903-23235668	+	1	Intronic	0.146	1.109
XLOC_015405	3L:23236054-23239947	+	3L:23242954-23246847	+	1	Intronic	-0.169	0.772
XLOC_015406	3L:23240015-23241321	+	3L:23246915-23248221	+	1	Intronic	-0.61	0.353
XLOC_015407	3L:23250377-23254459	+	3L:23257277-23261359	+	1	Intronic	-1.028	-0.233
XLOC_015408	3L:23254555-23255640	+	3L:23261455-23262540	+	1	Intronic	-1.965	-0.759
XLOC_015409	3L:23257506-23259708	+	3L:23264406-23266608	+	1	Intronic	-0.76	0.043
XLOC_015410	3L:23260660-23261284	+	3L:23267560-23268184	+	1	Intronic	-1.642	-0.586
XLOC_015411	3L:23274001-23274714	+	3L:23280901-23281614	+	1	Intronic	-0.509	0.385
XLOC_015412	3L:23274877-23275386	+	3L:23281777-23282286	+	1	Intronic	-0.491	0.528
XLOC_015413	3L:23275455-23276075	+	3L:23282355-23282975	+	1	Intronic	0.448	1.24
XLOC_015420	3L:23304418-23311665	+	3L:23311318-23318565	+	4	Intergenic	-0.917	-1.505
XLOC_015422	3L:23334703-23337033	+	3L:23341603-23343933	+	1	Intronic	2.853	3.318
XLOC_015433	3L:23549312-23550018	+	3L:23556212-23556918	+	1	Intronic	0.985	-5.352
XLOC_015437	3L:23576487-23577631	+	3L:23583387-23584531	+	1	Intronic	1.042	-0.84
XLOC_015438	3L:23579903-23583287	+	3L:23586803-23590187	+	1	Intronic	-0.958	-2.259
XLOC_015439	3L:23583411-23584674	+	3L:23590311-23591574	+	1	Intronic	-0.418	-3.335
XLOC_015440	3L:23584964-23589036	+	3L:23591864-23595936	+	1	Intronic	-0.424	-2.601
XLOC_015447	3L:23644589-23646873	+	3L:23651489-23653773	+	1	Intronic	0.457	-2.743
XLOC_015448	3L:23647091-23648521	+	3L:23653991-23655421	+	1	Intronic	0.24	-2.128
XLOC_015449	3L:23657890-23659968	+	3L:23664790-23666868	+	1	Intronic	-0.198	-2.486
XLOC_015463	3L:23732119-23733166	+	3L:23739019-23740066	+	1	Intronic	1.146	1.369
XLOC_015464	3L:23734236-23736469	+	3L:23741136-23743369	+	1	Intronic	1.396	1.923
XLOC_015465	3L:23736527-23739000	+	3L:23743427-23745900	+	1	Intronic	0.942	1.492
XLOC_015526	3L:24074057-24074234	+	3L:24080957-24081134	+	1	Intronic	-0.075	2.193
XLOC_015527	3L:24075313-24075600	+	3L:24082213-24082500	+	1	Intronic	-0.489	1.732
XLOC_015528	3L:24076140-24078450	+	3L:24083040-24085350	+	1	Intronic	0.214	1.069
[truncated: 2,283 more rows]

## Sheet: Table S2C
NTR ID	Transcript ID	Peptide length	Fickett Score	Isoelectric point	ORF integrity	Probability of coding	Classification
XLOC_000005	TCONS_00000012	14	0.30422	5.74823	1	0.0034538	noncoding
XLOC_000007	TCONS_00000017	38	0.25816	7.81305	1	0.0145327	noncoding
XLOC_000011	TCONS_00000026	28	0.39907	8.09723	-1	0.0351204	noncoding
XLOC_000025	TCONS_00000068	42	0.3757	11.4532	1	0.0253028	noncoding
XLOC_000038	TCONS_00000125	35	0.32436	9.00592	1	0.0101204	noncoding
XLOC_000089	TCONS_00000241	125	0.29585	10.3494	1	0.168656	noncoding
XLOC_000115	TCONS_00000270	99	0.27911	5.06512	1	0.300629	noncoding
XLOC_000122	TCONS_00000285	21	0.39798	9.30353	1	0.00756407	noncoding
XLOC_000124	TCONS_00000301	81	0.37883	9.67596	1	0.112744	noncoding
XLOC_000125	TCONS_00000302	73	0.33134	4.83868	1	0.100916	noncoding
XLOC_000152	TCONS_00000348	34	0.36372	10.8344	1	0.0174059	noncoding
XLOC_000198	TCONS_00000445	70	0.3964	10.2637	1	0.0926234	noncoding
XLOC_000203	TCONS_00000452	47	0.36682	8.96674	1	0.0197679	noncoding
XLOC_000204	TCONS_00000453	68	0.32244	5.91058	1	0.04652	noncoding
XLOC_000205	TCONS_00000454	51	0.33105	11.7897	1	0.0275506	noncoding
XLOC_000206	TCONS_00000455	34	0.34547	10.0601	1	0.0138519	noncoding
XLOC_000207	TCONS_00000456	19	0.43812	5.27386	1	0.00709054	noncoding
XLOC_000248	TCONS_00000507	102	0.27433	10.2136	1	0.0858783	noncoding
XLOC_000249	TCONS_00000508	56	0.3779	10.0113	-1	0.121615	noncoding
XLOC_000250	TCONS_00000509	43	0.43196	11.398	1	0.047764	noncoding
XLOC_000251	TCONS_00000510	27	0.40122	10.45	1	0.014911	noncoding
XLOC_000252	TCONS_00000511	11	0.36953	8.5401	1	0.00309358	noncoding
XLOC_000253	TCONS_00000517	22	0.26838	7.97699	-1	0.161313	noncoding
XLOC_000254	TCONS_00000518	36	0.43862	11.1054	-1	0.128292	noncoding
XLOC_000270	TCONS_00000546	114	0.32256	11.4743	1	0.140881	noncoding
XLOC_000271	TCONS_00000547	115	0.36117	8.66815	1	0.320352	noncoding
XLOC_000272	TCONS_00000548	69	0.3568	7.67194	1	0.0446185	noncoding
XLOC_000305	TCONS_00000595	32	0.43785	8.80243	1	0.01642	noncoding
XLOC_000381	TCONS_00000752	65	0.40333	9.85883	1	0.0774314	noncoding
XLOC_000393	TCONS_00000782	117	0.26817	9.52142	1	0.121114	noncoding
XLOC_000394	TCONS_00000784	44	0.44233	4.51251	1	0.0580679	noncoding
XLOC_000395	TCONS_00000786	31	0.42202	9.6983	-1	0.0691489	noncoding
XLOC_000398	TCONS_00000802	44	0.37367	10.1885	1	0.0243342	noncoding
XLOC_000399	TCONS_00000808	89	0.29251	9.46674	1	0.0652854	noncoding
XLOC_000400	TCONS_00000809	62	0.33502	10.6447	1	0.040107	noncoding
XLOC_000401	TCONS_00000810	63	0.46057	9.50873	1	0.147816	noncoding
XLOC_000402	TCONS_00000811	53	0.32069	9.74762	1	0.0239867	noncoding
XLOC_000403	TCONS_00000812	119	0.32477	9.50946	1	0.22042	noncoding
XLOC_000404	TCONS_00000813	40	0.30792	8.75189	1	0.0115713	noncoding
XLOC_000496	TCONS_00001003	39	0.38485	10.4022	1	0.0222207	noncoding
XLOC_000510	TCONS_00001086	38	0.2846	9.63922	1	0.0151436	noncoding
XLOC_000511	TCONS_00001087	98	0.35576	9.4046	1	0.163024	noncoding
XLOC_000512	TCONS_00001088	100	0.31463	10.33	1	0.108264	noncoding
XLOC_000559	TCONS_00001152	23	0.39379	8.47321	1	0.00618593	noncoding
XLOC_000560	TCONS_00001153	48	0.34775	6.21503	1	0.0164816	noncoding
XLOC_000561	TCONS_00001154	113	0.37437	10.4243	1	0.324741	noncoding
XLOC_000562	TCONS_00001155	25	0.3623	5.58539	1	0.00562881	noncoding
XLOC_000563	TCONS_00001156	40	0.34601	10.0451	1	0.017395	noncoding
XLOC_000564	TCONS_00001157	28	0.3324	11.1661	1	0.0143928	noncoding
XLOC_000565	TCONS_00001158	26	0.37483	7.99884	-1	0.0423658	noncoding
XLOC_000566	TCONS_00001159	76	0.33306	10.7656	1	0.0620679	noncoding
XLOC_000567	TCONS_00001160	46	0.39205	6.53754	1	0.0192144	noncoding
XLOC_000568	TCONS_00001161	121	0.32233	10.819	1	0.195523	noncoding
XLOC_000569	TCONS_00001162	103	0.33289	8.73505	1	0.148686	noncoding
XLOC_000570	TCONS_00001163	63	0.37825	10.8598	1	0.0583162	noncoding
XLOC_000571	TCONS_00001164	67	0.40871	8.21832	1	0.0711362	noncoding
XLOC_000572	TCONS_00001165	74	0.36597	10.7939	-1	0.16669	noncoding
XLOC_000574	TCONS_00001167	57	0.29722	10.4638	1	0.030304	noncoding
XLOC_000575	TCONS_00001168	53	0.46868	10.7543	1	0.144867	noncoding
XLOC_000576	TCONS_00001171	69	0.40362	10.1041	1	0.0957735	noncoding
XLOC_000577	TCONS_00001172	58	0.28786	9.59882	1	0.0264207	noncoding
XLOC_000578	TCONS_00001173	49	0.34382	9.59113	1	0.0218582	noncoding
XLOC_000579	TCONS_00001174	111	0.44298	10.2333	-1	0.164119	noncoding
XLOC_000580	TCONS_00001175	70	0.34629	9.59918	-1	0.137023	noncoding
XLOC_000582	TCONS_00001177	36	0.43914	9.52386	1	0.0267257	noncoding
XLOC_000583	TCONS_00001178	114	0.31038	8.91498	-1	0.158168	noncoding
XLOC_000584	TCONS_00001179	116	0.38678	9.1673	-1	0.123491	noncoding
XLOC_000585	TCONS_00001180	30	0.38273	9.52081	1	0.0115203	noncoding
XLOC_000586	TCONS_00001181	72	0.37046	9.01044	-1	0.0963874	noncoding
XLOC_000587	TCONS_00001182	37	0.36604	7.59698	1	0.00927766	noncoding
XLOC_000588	TCONS_00001183	78	0.37325	6.49225	1	0.0973987	noncoding
XLOC_000589	TCONS_00001184	35	0.36889	10.1923	1	0.0162422	noncoding
XLOC_000619	TCONS_00001231	26	0.41987	5.58295	1	0.00898533	noncoding
XLOC_000627	TCONS_00001254	102	0.32498	8.4693	1	0.132503	noncoding
XLOC_000635	TCONS_00001276	31	0.40813	9.70026	1	0.015451	noncoding
XLOC_000704	TCONS_00001550	58	0.38996	9.88593	1	0.0486929	noncoding
XLOC_000705	TCONS_00001551	42	0.36453	9.30133	1	0.0168667	noncoding
XLOC_000706	TCONS_00001552	91	0.34152	9.40717	1	0.106462	noncoding
XLOC_000712	TCONS_00001564	41	0.36184	12.2245	-1	0.178381	noncoding
XLOC_000713	TCONS_00001566	64	0.36225	5.77692	-1	0.0324239	noncoding
XLOC_000716	TCONS_00001572	42	0.29538	10.295	1	0.0195072	noncoding
XLOC_000717	TCONS_00001573	62	0.32906	10.765	1	0.0392186	noncoding
XLOC_000720	TCONS_00001581	33	0.36809	6.50751	1	0.00757561	noncoding
XLOC_000721	TCONS_00001583	34	0.39226	5.50934	1	0.0123751	noncoding
XLOC_000722	TCONS_00001584	36	0.38317	8.80292	1	0.0124448	noncoding
XLOC_000723	TCONS_00001585	14	0.42395	11.7114	1	0.0116758	noncoding
XLOC_000724	TCONS_00001586	76	0.27599	9.42316	1	0.0434187	noncoding
XLOC_000727	TCONS_00001589	38	0.43465	9.62164	-1	0.0669437	noncoding
XLOC_000728	TCONS_00001591	33	0.34154	7.95709	-1	0.0678577	noncoding
XLOC_000729	TCONS_00001592	51	0.43987	9.01398	1	0.0513752	noncoding
XLOC_000730	TCONS_00001593	24	0.35411	9.03497	1	0.00663706	noncoding
XLOC_000731	TCONS_00001595	32	0.36179	10.3478	1	0.0145101	noncoding
XLOC_000732	TCONS_00001596	23	0.3543	9.78204	1	0.00830331	noncoding
XLOC_000739	TCONS_00001693	46	0.39977	11.0521	1	0.036513	noncoding
XLOC_000740	TCONS_00001694	80	0.37232	9.75677	1	0.100912	noncoding
XLOC_000804	TCONS_00001815	46	0.28443	6.01202	1	0.018777	noncoding
XLOC_000805	TCONS_00001816	25	0.33346	11.0002	1	0.0127381	noncoding
XLOC_000828	TCONS_00001862	62	0.39578	9.25006	1	0.0556245	noncoding
XLOC_000830	TCONS_00001864	81	0.37881	7.59332	1	0.102002	noncoding
XLOC_000831	TCONS_00001865	27	0.36361	9.65387	1	0.00962518	noncoding
XLOC_000855	TCONS_00001909	54	0.42078	8.41925	1	0.0418193	noncoding
XLOC_000856	TCONS_00001910	96	0.38728	9.50751	1	0.224997	noncoding
XLOC_000857	TCONS_00001911	35	0.41145	9.99469	1	0.0211852	noncoding
XLOC_000859	TCONS_00001912	99	0.29607	9.83868	1	0.0898583	noncoding
XLOC_000860	TCONS_00001913	63	0.41514	10.1633	-1	0.112752	noncoding
XLOC_000861	TCONS_00001915	44	0.33142	9.30157	1	0.0158689	noncoding
XLOC_000862	TCONS_00001916	31	0.35707	11.3797	-1	0.180067	noncoding
XLOC_000863	TCONS_00001917	25	0.45915	12.032	1	0.0317156	noncoding
XLOC_000864	TCONS_00001918	49	0.3484	8.80377	1	0.0185982	noncoding
XLOC_000893	TCONS_00001976	24	0.30545	11.4196	1	0.015062	noncoding
XLOC_000926	TCONS_00002044	50	0.42104	8.49384	1	0.0341906	noncoding
XLOC_000927	TCONS_00002045	52	0.40636	9.05646	1	0.0366477	noncoding
XLOC_000928	TCONS_00002046	74	0.30324	4.86285	1	0.103758	noncoding
XLOC_000941	TCONS_00002076	22	0.38037	7.95343	1	0.00476637	noncoding
XLOC_000942	TCONS_00002077	24	0.33432	8.53632	1	0.00554171	noncoding
XLOC_000945	TCONS_00002086	40	0.37536	11.4532	1	0.0234792	noncoding
XLOC_000967	TCONS_00002123	65	0.41539	9.45355	1	0.0843547	noncoding
XLOC_000984	TCONS_00002151	23	0.34003	9.69708	1	0.00797423	noncoding
XLOC_000985	TCONS_00002152	70	0.36565	10.8867	-1	0.168336	noncoding
XLOC_000986	TCONS_00002153	31	0.37201	9.35968	1	0.0108227	noncoding
XLOC_001002	TCONS_00002177	31	0.39474	6.48016	-1	0.019825	noncoding
XLOC_001061	TCONS_00002269	35	0.39916	8.88531	1	0.0136348	noncoding
XLOC_001064	TCONS_00002277	74	0.36522	9.72247	1	0.0729193	noncoding
XLOC_001091	TCONS_00002344	67	0.30806	10.1451	1	0.0389702	noncoding
XLOC_001098	TCONS_00002364	64	0.34696	10.123	1	0.0439566	noncoding
XLOC_001099	TCONS_00002365	42	0.3695	9.49628	1	0.0183241	noncoding
XLOC_001101	TCONS_00002369	22	0.25242	8.2757	1	0.0102933	noncoding
XLOC_001117	TCONS_00002403	43	0.31473	6.49164	1	0.0114618	noncoding
XLOC_001130	TCONS_00002453	0	0.29787	0	-1	5.42189e-07	noncoding
XLOC_001131	TCONS_00002454	144	0.36113	10.215	1	0.579216	coding
XLOC_001157	TCONS_00002514	60	0.3323	10.1949	1	0.0350128	noncoding
XLOC_001178	TCONS_00002565	79	0.31209	8.9903	1	0.0512063	noncoding
XLOC_001261	TCONS_00002703	113	0.33911	9.86395	1	0.216504	noncoding
XLOC_001263	TCONS_00002705	95	0.3078	11.4235	1	0.0802156	noncoding
XLOC_001264	TCONS_00002706	56	0.30393	11.3801	1	0.0322966	noncoding
XLOC_001266	TCONS_00002715	97	0.31432	9.2547	1	0.0983657	noncoding
XLOC_001267	TCONS_00002716	52	0.3476	10.3101	1	0.0291262	noncoding
XLOC_001268	TCONS_00002717	56	0.36106	8.59125	1	0.0267438	noncoding
XLOC_001269	TCONS_00002718	46	0.35516	6.20563	-1	0.0319476	noncoding
XLOC_001270	TCONS_00002719	36	0.40785	9.30267	1	0.0175284	noncoding
XLOC_001271	TCONS_00002720	59	0.38829	9.34381	1	0.045303	noncoding
XLOC_001272	TCONS_00002721	43	0.37807	9.81744	1	0.0220725	noncoding
XLOC_001273	TCONS_00002722	58	0.31684	8.7204	1	0.023115	noncoding
XLOC_001274	TCONS_00002723	64	0.3363	9.74359	1	0.0384736	noncoding
XLOC_001275	TCONS_00002724	46	0.37392	9.5755	1	0.0230675	noncoding
XLOC_001276	TCONS_00002725	86	0.42351	8.66705	1	0.22408	noncoding
XLOC_001277	TCONS_00002726	126	0.2921	10.3051	1	0.166701	noncoding
XLOC_001278	TCONS_00002727	86	0.29967	8.11676	1	0.0607177	noncoding
XLOC_001279	TCONS_00002728	53	0.35733	10.9031	1	0.0341218	noncoding
XLOC_001280	TCONS_00002729	59	0.39818	10.0209	1	0.0569482	noncoding
XLOC_001281	TCONS_00002730	83	0.31501	9.7973	1	0.0642062	noncoding
XLOC_001282	TCONS_00002731	81	0.31852	7.69891	1	0.0568527	noncoding
XLOC_001283	TCONS_00002732	69	0.38574	7.52301	1	0.0598595	noncoding
XLOC_001284	TCONS_00002733	26	0.3331	9.99261	1	0.00994328	noncoding
XLOC_001285	TCONS_00002735	44	0.40598	8.27594	1	0.0202099	noncoding
XLOC_001286	TCONS_00002736	51	0.40862	10.015	1	0.0443923	noncoding
XLOC_001287	TCONS_00002737	33	0.39606	7.83514	1	0.00936735	noncoding
XLOC_001288	TCONS_00002738	40	0.29077	9.65509	1	0.0156031	noncoding
XLOC_001289	TCONS_00002739	62	0.31425	10.6371	1	0.0365724	noncoding
XLOC_001290	TCONS_00002740	30	0.42484	7.95819	1	0.0101656	noncoding
XLOC_001293	TCONS_00002746	55	0.42343	10.0113	1	0.0646907	noncoding
XLOC_001294	TCONS_00002747	39	0.37238	8.60931	1	0.0128108	noncoding
XLOC_001308	TCONS_00002786	34	0.34437	10.1711	1	0.0142578	noncoding
XLOC_001310	TCONS_00002791	10	0.38689	9.50006	1	0.0044929	noncoding
XLOC_001312	TCONS_00002796	59	0.34839	6.05341	1	0.0314688	noncoding
XLOC_001313	TCONS_00002797	11	0.42738	7.99982	1	0.00342911	noncoding
XLOC_001315	TCONS_00002800	80	0.27994	6.0235	1	0.0850073	noncoding
XLOC_001316	TCONS_00002801	54	0.37642	8.76984	1	0.0284988	noncoding
XLOC_001318	TCONS_00002803	42	0.35697	6.09381	1	0.0127684	noncoding
XLOC_001319	TCONS_00002804	51	0.38907	8.34479	1	0.0254175	noncoding
XLOC_001332	TCONS_00002831	81	0.32144	7.78754	1	0.0576261	noncoding
XLOC_001333	TCONS_00002832	41	0.32244	5.03229	1	0.0161138	noncoding
XLOC_001382	TCONS_00002943	82	0.34499	9.73199	1	0.0808284	noncoding
XLOC_001401	TCONS_00002999	26	0.38495	7.93365	1	0.0060288	noncoding
XLOC_001406	TCONS_00003016	51	0.38084	10.3705	1	0.0356362	noncoding
XLOC_001425	TCONS_00003066	62	0.37836	9.03864	1	0.0446229	noncoding
XLOC_001428	TCONS_00003069	107	0.29088	10.6116	1	0.103532	noncoding
XLOC_001497	TCONS_00003192	58	0.30767	7.94794	-1	0.117393	noncoding
XLOC_001568	TCONS_00003329	99	0.30136	10.0412	1	0.093743	noncoding
XLOC_001641	TCONS_00003483	10	0.44966	4.08453	1	0.00795294	noncoding
XLOC_001647	TCONS_00003510	25	0.34548	9.70038	1	0.00866397	noncoding
XLOC_001648	TCONS_00003511	73	0.30305	5.20709	1	0.0819232	noncoding
XLOC_001649	TCONS_00003512	80	0.33754	11.5115	1	0.066656	noncoding
XLOC_001650	TCONS_00003513	80	0.36577	9.51398	1	0.0916984	noncoding
XLOC_001651	TCONS_00003515	56	0.2831	9.73248	1	0.0259656	noncoding
XLOC_001652	TCONS_00003516	87	0.32238	12.0056	1	0.0616547	noncoding
XLOC_001655	TCONS_00003519	90	0.3174	9.48273	1	0.0807363	noncoding
XLOC_001656	TCONS_00003520	67	0.3554	9.88776	1	0.0511609	noncoding
XLOC_001657	TCONS_00003521	195	0.30159	9.34418	1	0.728013	coding
XLOC_001659	TCONS_00003526	12	0.30496	8.02032	1	0.00323071	noncoding
XLOC_001660	TCONS_00003527	17	0.32976	8.18976	-1	0.0806891	noncoding
XLOC_001661	TCONS_00003528	38	0.42975	7.65228	-1	0.0268855	noncoding
XLOC_001663	TCONS_00003530	18	0.40243	9.10272	1	0.00620143	noncoding
XLOC_001672	TCONS_00003556	40	0.40081	8.65765	1	0.0169126	noncoding
XLOC_001673	TCONS_00003557	30	0.34023	9.99249	1	0.0115573	noncoding
XLOC_001674	TCONS_00003558	159	0.29367	9.40692	1	0.397191	noncoding
XLOC_001675	TCONS_00003560	75	0.23373	11.353	1	0.0818964	noncoding
XLOC_001787	TCONS_00003721	39	0.4248	7.92169	1	0.0170629	noncoding
XLOC_001819	TCONS_00003770	62	0.4128	9.98859	-1	0.105076	noncoding
XLOC_001820	TCONS_00003771	55	0.48905	10.45	1	0.222869	noncoding
XLOC_001831	TCONS_00003804	79	0.30982	8.17438	1	0.0488284	noncoding
XLOC_001844	TCONS_00003843	12	0.36783	3.79462	1	0.00613838	noncoding
XLOC_001845	TCONS_00003853	79	0.38914	9.48297	1	0.115386	noncoding
XLOC_001848	TCONS_00003858	56	0.31726	9.80109	1	0.0266177	noncoding
XLOC_001849	TCONS_00003859	49	0.35333	7.74811	1	0.0161758	noncoding
XLOC_001850	TCONS_00003860	86	0.33691	9.01056	1	0.0821014	noncoding
XLOC_001851	TCONS_00003861	78	0.34162	6.67096	1	0.0683251	noncoding
XLOC_001852	TCONS_00003862	145	0.32774	10.0704	1	0.413274	noncoding
XLOC_001853	TCONS_00003863	47	0.38679	8.52228	-1	0.05733	noncoding
XLOC_001854	TCONS_00003864	24	0.42704	10.2774	1	0.0158415	noncoding
XLOC_001855	TCONS_00003865	117	0.31582	8.12433	1	0.210923	noncoding
XLOC_001860	TCONS_00003870	61	0.31418	8.01141	1	0.0239367	noncoding
XLOC_001861	TCONS_00003871	80	0.30347	8.8432	1	0.0499423	noncoding
XLOC_001862	TCONS_00003872	83	0.28498	9.86969	1	0.0550926	noncoding
XLOC_001863	TCONS_00003873	48	0.32615	10.289	1	0.0231392	noncoding
XLOC_001864	TCONS_00003874	109	0.29367	9.32123	1	0.117935	noncoding
XLOC_001866	TCONS_00003876	163	0.31852	9.45978	1	0.562894	coding
XLOC_001867	TCONS_00003877	71	0.34437	8.90717	1	0.0476136	noncoding
XLOC_001892	TCONS_00003959	32	0.39117	10.2073	1	0.0163439	noncoding
XLOC_001893	TCONS_00003960	45	0.384	10.1735	1	0.0273526	noncoding
XLOC_001897	TCONS_00003967	215	0.37301	6.14838	1	0.997484	coding
XLOC_001935	TCONS_00004060	37	0.36871	9.68463	1	0.0153944	noncoding
XLOC_002035	TCONS_00004194	100	0.30492	5.57391	1	0.223701	noncoding
XLOC_002038	TCONS_00004215	40	0.45916	9.00824	-1	0.0466308	noncoding
XLOC_002039	TCONS_00004218	87	0.41084	6.00739	1	0.265585	noncoding
XLOC_002190	TCONS_00004411	48	0.31432	9.74579	1	0.0199174	noncoding
XLOC_002278	TCONS_00004567	140	0.2921	9.58807	1	0.25311	noncoding
XLOC_002279	TCONS_00004568	36	0.34903	9.40204	1	0.0124469	noncoding
XLOC_002285	TCONS_00004574	69	0.34106	10.5909	1	0.0524174	noncoding
XLOC_002290	TCONS_00004580	171	0.29367	11.0289	1	0.341788	noncoding
XLOC_002294	TCONS_00004588	96	0.40186	6.37762	1	0.327392	noncoding
XLOC_002295	TCONS_00004589	15	0.33199	7.97601	1	0.00316027	noncoding
XLOC_002304	TCONS_00004618	12	0.40723	6.68427	1	0.00270841	noncoding
XLOC_002316	TCONS_00004650	8	0.38174	6.49139	-1	0.0164387	noncoding
XLOC_002317	TCONS_00004651	52	0.37395	8.58771	1	0.024457	noncoding
XLOC_002388	TCONS_00004756	41	0.37688	6.50861	1	0.0127097	noncoding
XLOC_002389	TCONS_00004757	54	0.44166	9.81891	1	0.0768088	noncoding
XLOC_002390	TCONS_00004758	40	0.32399	11.4931	1	0.0210603	noncoding
XLOC_002391	TCONS_00004759	16	0.33789	8.65704	-1	0.0876488	noncoding
XLOC_002392	TCONS_00004760	20	0.3133	4.1369	1	0.00831776	noncoding
XLOC_002393	TCONS_00004761	26	0.43184	10.9033	-1	0.112993	noncoding
XLOC_002485	TCONS_00004906	39	0.45148	6.50531	1	0.0195407	noncoding
XLOC_002486	TCONS_00004907	55	0.39616	9.435	1	0.041438	noncoding
XLOC_002487	TCONS_00004908	20	0.29637	7.88043	1	0.00465038	noncoding
XLOC_002511	TCONS_00004942	72	0.33544	9.72333	1	0.0512036	noncoding
XLOC_002512	TCONS_00004943	65	0.29367	10.787	1	0.0388751	noncoding
XLOC_002513	TCONS_00004944	146	0.2895	11.0251	1	0.211841	noncoding
XLOC_002514	TCONS_00004945	55	0.33887	9.383	1	0.0258024	noncoding
XLOC_002522	TCONS_00004962	204	0.45489	9.45758	-1	0.303945	noncoding
XLOC_002548	TCONS_00005009	88	0.39528	9.94769	1	0.186548	noncoding
XLOC_002549	TCONS_00005010	36	0.37146	7.71259	1	0.00919706	noncoding
XLOC_002550	TCONS_00005011	68	0.33565	6.51752	1	0.0411854	noncoding
XLOC_002551	TCONS_00005012	102	0.31292	9.30011	1	0.114284	noncoding
XLOC_002552	TCONS_00005013	98	0.36432	9.36444	1	0.18115	noncoding
XLOC_002553	TCONS_00005014	100	0.31553	10.5853	1	0.107829	noncoding
XLOC_002554	TCONS_00005015	38	0.34215	7.85858	1	0.00910738	noncoding
XLOC_002555	TCONS_00005016	54	0.40111	9.61688	-1	0.0893673	noncoding
XLOC_002558	TCONS_00005033	10	0.43339	12.0085	1	0.0104679	noncoding
XLOC_002613	TCONS_00005160	102	0.34315	8.28033	1	0.164418	noncoding
XLOC_002664	TCONS_00005251	131	0.28683	9.60699	1	0.192687	noncoding
XLOC_002666	TCONS_00005253	170	0.35027	8.48334	1	0.839301	coding
XLOC_002667	TCONS_00005254	83	0.32236	7.6098	1	0.0640349	noncoding
XLOC_002668	TCONS_00005255	22	0.44205	11.0002	1	0.0208587	noncoding
XLOC_002669	TCONS_00005257	113	0.28518	9.34454	1	0.12296	noncoding
XLOC_002670	TCONS_00005258	167	0.28584	9.82892	1	0.386045	noncoding
XLOC_002671	TCONS_00005259	132	0.32349	5.12848	1	0.709285	coding
XLOC_002672	TCONS_00005260	155	0.33678	8.85724	1	0.629147	coding
XLOC_002674	TCONS_00005262	113	0.29367	9.15643	1	0.133633	noncoding
XLOC_002675	TCONS_00005263	115	0.38183	11.8192	1	0.270186	noncoding
XLOC_002676	TCONS_00005264	94	0.35025	10.3569	1	0.132748	noncoding
XLOC_002678	TCONS_00005266	96	0.32862	10.1721	1	0.111492	noncoding
XLOC_002680	TCONS_00005268	65	0.33002	10.4019	1	0.0420223	noncoding
XLOC_002685	TCONS_00005273	33	0.3971	7.9566	1	0.00963531	noncoding
XLOC_002686	TCONS_00005274	15	0.34058	5.92023	-1	0.0247008	noncoding
XLOC_002687	TCONS_00005276	56	0.3637	8.70941	1	0.0278711	noncoding
XLOC_002688	TCONS_00005277	36	0.3991	9.8399	-1	0.0885349	noncoding
XLOC_002689	TCONS_00005278	74	0.33465	8.6629	1	0.048442	noncoding
XLOC_002695	TCONS_00005287	57	0.35311	6.79132	1	0.0249077	noncoding
XLOC_002715	TCONS_00005320	87	0.36201	10.2059	1	0.11961	noncoding
XLOC_002759	TCONS_00005397	60	0.29857	5.76447	1	0.0344952	noncoding
XLOC_002760	TCONS_00005398	13	0.37868	9.4964	1	0.00504308	noncoding
XLOC_002761	TCONS_00005399	73	0.37759	5.42523	1	0.113691	noncoding
XLOC_002762	TCONS_00005400	33	0.30786	9.18805	-1	0.152251	noncoding
XLOC_002763	TCONS_00005401	49	0.47634	10.4249	-1	0.104066	noncoding
XLOC_002764	TCONS_00005402	85	0.37794	6.52179	1	0.14603	noncoding
XLOC_002766	TCONS_00005404	41	0.35954	7.14301	1	0.0108108	noncoding
XLOC_002768	TCONS_00005415	48	0.43815	9.81525	1	0.0538653	noncoding
XLOC_002777	TCONS_00005438	100	0.34619	9.84967	1	0.155989	noncoding
XLOC_002778	TCONS_00005439	153	0.31762	10.0847	1	0.426267	noncoding
XLOC_002779	TCONS_00005440	36	0.40063	10.0327	-1	0.0956966	noncoding
XLOC_002787	TCONS_00005459	97	0.33827	8.38812	1	0.127084	noncoding
XLOC_002842	TCONS_00005576	80	0.37281	9.29877	1	0.0973668	noncoding
XLOC_002843	TCONS_00005577	35	0.28511	5.96014	1	0.0115295	noncoding
XLOC_002844	TCONS_00005581	62	0.32205	8.55475	1	0.0270107	noncoding
XLOC_002845	TCONS_00005583	19	0.26407	6.0025	1	0.00886811	noncoding
XLOC_002846	TCONS_00005585	15	0.3331	5.19391	-1	0.0205735	noncoding
XLOC_002859	TCONS_00005628	75	0.34003	8.98114	1	0.0545362	noncoding
XLOC_002860	TCONS_00005629	12	0.34665	9.99237	1	0.00576558	noncoding
XLOC_002861	TCONS_00005630	3	0.41597	5.27496	-1	0.00928208	noncoding
XLOC_002862	TCONS_00005631	36	0.37594	9.3028	-1	0.0835583	noncoding
XLOC_002871	TCONS_00005652	44	0.25665	11.5567	1	0.0390138	noncoding
XLOC_002872	TCONS_00005653	50	0.36077	11.8819	1	0.0284465	noncoding
XLOC_002876	TCONS_00005665	120	0.4633	7.05878	-1	0.0748424	noncoding
XLOC_002878	TCONS_00005667	19	0.31549	7.93329	1	0.0039642	noncoding
XLOC_002879	TCONS_00005668	5	0.29086	8.50006	1	0.00331335	noncoding
XLOC_002903	TCONS_00005697	61	0.25198	9.51483	1	0.0352218	noncoding
XLOC_002906	TCONS_00005705	49	0.38494	10.7502	1	0.0354851	noncoding
XLOC_002913	TCONS_00005714	37	0.42547	11.4532	1	0.0331999	noncoding
XLOC_002914	TCONS_00005715	38	0.23588	3.91632	1	0.240511	noncoding
XLOC_002915	TCONS_00005716	81	0.37617	9.50348	1	0.107638	noncoding
XLOC_002916	TCONS_00005717	43	0.25459	5.04584	1	0.0545749	noncoding
XLOC_002917	TCONS_00005718	91	0.32929	6.0047	1	0.141797	noncoding
XLOC_002918	TCONS_00005719	51	0.34354	7.8139	1	0.0169821	noncoding
XLOC_002920	TCONS_00005722	21	0.38811	11.0128	1	0.0117979	noncoding
XLOC_002922	TCONS_00005724	11	0.35679	3.79462	1	0.00535054	noncoding
XLOC_002923	TCONS_00005725	24	0.38609	7.84698	1	0.00534947	noncoding
XLOC_002989	TCONS_00005858	44	0.42944	7.93439	1	0.0239059	noncoding
XLOC_002991	TCONS_00005860	30	0.34457	9.78326	1	0.0108677	noncoding
XLOC_003015	TCONS_00005924	52	0.39079	5.53864	1	0.0366812	noncoding
XLOC_003017	TCONS_00005926	97	0.3969	9.17755	1	0.260726	noncoding
XLOC_003018	TCONS_00005927	109	0.44911	6.21503	1	0.669725	coding
XLOC_003020	TCONS_00005931	58	0.32382	5.86481	1	0.0285052	noncoding
XLOC_003022	TCONS_00005950	55	0.34952	10.2648	1	0.0326821	noncoding
XLOC_003055	TCONS_00005993	22	0.39478	3.99884	1	0.0134697	noncoding
XLOC_003056	TCONS_00005994	45	0.32006	11.4816	1	0.0241715	noncoding
XLOC_003064	TCONS_00006012	74	0.35307	10.0491	1	0.0667289	noncoding
XLOC_003076	TCONS_00006040	68	0.26773	9.86798	1	0.0385376	noncoding
XLOC_003077	TCONS_00006041	3	0.30802	5.27496	1	1.3767e-05	noncoding
XLOC_003078	TCONS_00006042	60	0.37157	8.38629	1	0.0343543	noncoding
XLOC_003079	TCONS_00006043	51	0.41531	9.29865	-1	0.0699063	noncoding
XLOC_003080	TCONS_00006044	31	0.35359	4.1369	1	0.0150174	noncoding
XLOC_003081	TCONS_00006045	78	0.27517	6.78619	1	0.0591629	noncoding
XLOC_003081	TCONS_00006046	64	0.34941	9.92474	1	0.0435498	noncoding
XLOC_003082	TCONS_00006047	131	0.42484	10.0485	1	0.775849	coding
XLOC_003083	TCONS_00006048	127	0.31027	10.3956	1	0.208285	noncoding
XLOC_003090	TCONS_00006059	148	0.3644	9.54816	1	0.669194	coding
XLOC_003090	TCONS_00006060	148	0.3413	9.54816	1	0.546021	coding
XLOC_003090	TCONS_00006061	148	0.38517	9.54816	1	0.771165	coding
XLOC_003090	TCONS_00006062	148	0.38289	9.54816	1	0.761365	coding
XLOC_003093	TCONS_00006065	12	0.28593	9.51996	-1	0.188143	noncoding
XLOC_003094	TCONS_00006066	18	0.29859	10.2891	1	0.00976756	noncoding
XLOC_003095	TCONS_00006067	14	0.32775	5.27277	1	0.00323444	noncoding
XLOC_003097	TCONS_00006111	68	0.29367	10.4515	1	0.0403245	noncoding
XLOC_003104	TCONS_00006135	73	0.34416	9.13751	1	0.053117	noncoding
XLOC_003106	TCONS_00006137	49	0.3139	7.82404	1	0.0142368	noncoding
XLOC_003109	TCONS_00006140	79	0.31557	9.43182	1	0.054611	noncoding
XLOC_003110	TCONS_00006142	9	0.36266	3.79938	-1	0.00819252	noncoding
XLOC_003111	TCONS_00006143	164	0.37816	9.5025	1	0.858848	coding
XLOC_003112	TCONS_00006144	26	0.38171	5.30243	1	0.00748241	noncoding
XLOC_003113	TCONS_00006146	42	0.31463	8.39471	1	0.0114942	noncoding
XLOC_003114	TCONS_00006159	129	0.32005	10.0086	1	0.260669	noncoding
XLOC_003117	TCONS_00006167	9	0.3542	5.27496	1	1.64969e-05	noncoding
XLOC_003133	TCONS_00006221	47	0.37886	8.65753	1	0.0201609	noncoding
XLOC_003134	TCONS_00006222	23	0.37624	3.99884	1	0.0118373	noncoding
XLOC_003146	TCONS_00006255	64	0.33686	5.56354	1	0.0456982	noncoding
XLOC_003159	TCONS_00006275	106	0.35193	9.7641	1	0.205044	noncoding
XLOC_003173	TCONS_00006301	39	0.39613	11.735	1	0.02501	noncoding
XLOC_003176	TCONS_00006308	40	0.28502	5.89178	1	0.0148568	noncoding
XLOC_003302	TCONS_00006503	64	0.38301	9.84589	1	0.0586089	noncoding
XLOC_003303	TCONS_00006504	26	0.28972	3.79462	1	0.0209606	noncoding
XLOC_003304	TCONS_00006505	87	0.32072	8.67706	1	0.072158	noncoding
XLOC_003305	TCONS_00006506	55	0.41328	12.3011	1	0.044686	noncoding
XLOC_003306	TCONS_00006507	134	0.31289	9.66595	1	0.280312	noncoding
XLOC_003319	TCONS_00006530	18	0.39745	4.21881	1	0.00916341	noncoding
XLOC_003320	TCONS_00006531	0	0.36729	0	-1	3.68153e-06	noncoding
XLOC_003321	TCONS_00006533	3	0.36341	9.50006	-1	0.0881361	noncoding
XLOC_003346	TCONS_00006583	21	0.42369	8.27448	1	0.00646967	noncoding
XLOC_003347	TCONS_00006585	66	0.33075	10.622	1	0.0444443	noncoding
XLOC_003433	TCONS_00006753	71	0.30431	9.71869	1	0.0408456	noncoding
XLOC_003434	TCONS_00006754	15	0.38093	3.79938	1	0.00839588	noncoding
XLOC_003435	TCONS_00006755	62	0.31109	10.2576	1	0.0344366	noncoding
XLOC_003436	TCONS_00006758	25	0.33913	10.289	-1	0.159448	noncoding
XLOC_003441	TCONS_00006767	38	0.35584	10.9532	1	0.0199159	noncoding
XLOC_003458	TCONS_00006812	27	0.40361	8.93964	1	0.00945189	noncoding
XLOC_003459	TCONS_00006813	79	0.34159	6.68732	-1	0.0619038	noncoding
XLOC_003460	TCONS_00006814	59	0.42982	6.03937	-1	0.0251669	noncoding
XLOC_003461	TCONS_00006817	39	0.37417	9.49872	-1	0.0941392	noncoding
XLOC_003462	TCONS_00006818	110	0.35371	10.8557	1	0.216002	noncoding
XLOC_003464	TCONS_00006824	99	0.35195	9.50555	1	0.161531	noncoding
XLOC_003465	TCONS_00006825	20	0.36613	5.30267	1	0.00467209	noncoding
XLOC_003466	TCONS_00006826	62	0.34523	8.93195	1	0.0328967	noncoding
XLOC_003467	TCONS_00006827	82	0.34695	11.0419	1	0.0829594	noncoding
XLOC_003483	TCONS_00006869	29	0.42146	7.95428	1	0.00931038	noncoding
XLOC_003489	TCONS_00006877	39	0.34436	8.50702	1	0.0108989	noncoding
XLOC_003496	TCONS_00006889	53	0.29607	8.05182	1	0.0173318	noncoding
XLOC_003505	TCONS_00006905	81	0.41222	5.29242	1	0.264014	noncoding
XLOC_003506	TCONS_00006906	68	0.38996	10.0761	-1	0.123645	noncoding
XLOC_003507	TCONS_00006907	74	0.35515	9.45306	1	0.0637842	noncoding
XLOC_003508	TCONS_00006908	115	0.39382	10.0798	1	0.443066	noncoding
XLOC_003509	TCONS_00006909	118	0.37466	11.721	1	0.276424	noncoding
XLOC_003519	TCONS_00006926	78	0.32667	10.2321	1	0.0618	noncoding
XLOC_003520	TCONS_00006927	80	0.39847	6.22406	1	0.154363	noncoding
XLOC_003521	TCONS_00006928	76	0.37496	9.87762	1	0.089353	noncoding
XLOC_003522	TCONS_00006929	32	0.34982	9.38239	1	0.0104732	noncoding
XLOC_003550	TCONS_00006971	44	0.39337	4.94269	1	0.0306019	noncoding
XLOC_003579	TCONS_00007031	29	0.43778	9.10223	1	0.0154341	noncoding
XLOC_003580	TCONS_00007032	37	0.44508	6.8067	1	0.0163251	noncoding
XLOC_003581	TCONS_00007039	76	0.35206	10.6738	1	0.0730537	noncoding
XLOC_003608	TCONS_00007090	55	0.33164	10.8798	1	0.0321451	noncoding
XLOC_003609	TCONS_00007091	35	0.30638	6.5108	1	0.00807129	noncoding
XLOC_003610	TCONS_00007092	57	0.38794	11.7184	1	0.0458574	noncoding
XLOC_003611	TCONS_00007093	34	0.30307	9.30231	1	0.011016	noncoding
XLOC_003633	TCONS_00007167	135	0.3488	10.2549	1	0.421397	noncoding
XLOC_003634	TCONS_00007168	18	0.43687	4.55658	-1	0.0134352	noncoding
XLOC_003639	TCONS_00007205	30	0.47459	12.1271	1	0.0560652	noncoding
XLOC_003640	TCONS_00007206	29	0.42402	12.4828	1	0.0169063	noncoding
XLOC_003642	TCONS_00007208	115	0.33002	9.67169	1	0.207066	noncoding
XLOC_003668	TCONS_00007245	37	0.31809	9.8399	1	0.0140776	noncoding
XLOC_003675	TCONS_00007259	59	0.39416	9.18512	-1	0.0800721	noncoding
XLOC_003680	TCONS_00007279	75	0.38006	11.1942	1	0.090404	noncoding
XLOC_003681	TCONS_00007280	40	0.34366	10.7366	1	0.0200457	noncoding
XLOC_003687	TCONS_00007325	28	0.43421	12.0165	1	0.0229663	noncoding
XLOC_003700	TCONS_00007368	140	0.29088	9.42389	1	0.255741	noncoding
XLOC_003701	TCONS_00007369	101	0.4076	5.73724	1	0.490974	noncoding
XLOC_003701	TCONS_00007370	101	0.31852	5.73724	1	0.227692	noncoding
XLOC_003771	TCONS_00007479	73	0.33281	6.88068	1	0.0480525	noncoding
XLOC_003784	TCONS_00007498	74	0.30729	10.2073	1	0.0481796	noncoding
XLOC_003851	TCONS_00007636	49	0.31494	9.18011	1	0.0179458	noncoding
XLOC_003867	TCONS_00007705	127	0.34103	10.0814	1	0.322504	noncoding
XLOC_003872	TCONS_00007728	79	0.34393	5.7569	1	0.0974329	noncoding
XLOC_003873	TCONS_00007729	66	0.37116	9.63165	1	0.0548273	noncoding
XLOC_003893	TCONS_00007766	81	0.38199	8.83624	1	0.108729	noncoding
XLOC_003902	TCONS_00007792	55	0.37127	5.17987	-1	0.023201	noncoding
XLOC_003903	TCONS_00007793	38	0.33009	6.5235	1	0.00874446	noncoding
XLOC_003904	TCONS_00007794	76	0.31518	10.3207	1	0.0539268	noncoding
XLOC_003922	TCONS_00007814	29	0.34626	7.99884	1	0.00612208	noncoding
XLOC_003923	TCONS_00007816	51	0.33863	7.96088	1	0.0168139	noncoding
XLOC_003924	TCONS_00007817	64	0.35946	9.16107	1	0.0417809	noncoding
XLOC_003925	TCONS_00007818	47	0.35079	8.44696	1	0.0159879	noncoding
XLOC_003929	TCONS_00007825	61	0.30404	9.0025	-1	0.154167	noncoding
XLOC_003939	TCONS_00007850	20	0.43362	11.0002	1	0.0167947	noncoding
XLOC_003940	TCONS_00007851	44	0.37784	7.85675	-1	0.0453655	noncoding
XLOC_003941	TCONS_00007852	80	0.37179	4.73492	-1	0.0310639	noncoding
XLOC_003969	TCONS_00007905	29	0.44934	6.81012	1	0.0100564	noncoding
XLOC_003971	TCONS_00007913	47	0.42321	9.45477	1	0.0380342	noncoding
XLOC_003972	TCONS_00007914	61	0.36828	7.76617	1	0.0332199	noncoding
XLOC_003973	TCONS_00007917	46	0.41892	8.68988	-1	0.0489197	noncoding
XLOC_003974	TCONS_00007918	86	0.36604	8.8808	1	0.112354	noncoding
XLOC_003975	TCONS_00007919	37	0.34625	9.42938	1	0.0129683	noncoding
XLOC_003976	TCONS_00007923	55	0.38993	10.0444	1	0.043775	noncoding
XLOC_003977	TCONS_00007925	32	0.30406	4.99701	1	0.0114306	noncoding
XLOC_004014	TCONS_00007984	42	0.43758	10.2664	1	0.0444553	noncoding
XLOC_004015	TCONS_00007985	57	0.42735	6.87982	-1	0.027816	noncoding
XLOC_004016	TCONS_00007986	90	0.28334	6.37201	1	0.106112	noncoding
XLOC_004019	TCONS_00007994	49	0.35654	9.41632	1	0.0225036	noncoding
XLOC_004020	TCONS_00007998	52	0.37555	8.10602	1	0.0229636	noncoding
XLOC_004021	TCONS_00008001	56	0.35736	9.73712	1	0.0325712	noncoding
XLOC_004022	TCONS_00008003	74	0.3413	9.8476	1	0.0587253	noncoding
XLOC_004024	TCONS_00008005	60	0.39774	10.6251	1	0.0632872	noncoding
XLOC_004025	TCONS_00008006	79	0.30432	10.5999	1	0.0562225	noncoding
XLOC_004041	TCONS_00008029	64	0.36506	8.85846	1	0.0418563	noncoding
XLOC_004042	TCONS_00008030	72	0.28498	10.1243	1	0.0425355	noncoding
XLOC_004043	TCONS_00008040	40	0.42642	9.78204	1	0.0303409	noncoding
XLOC_004047	TCONS_00008045	41	0.31717	10.3705	1	0.0185971	noncoding
XLOC_004058	TCONS_00008072	93	0.30519	8.47382	1	0.0795789	noncoding
XLOC_004069	TCONS_00008100	43	0.39933	10.2845	1	0.0292974	noncoding
XLOC_004070	TCONS_00008101	76	0.2895	10.3575	1	0.0486325	noncoding
XLOC_004071	TCONS_00008102	43	0.39374	4.91119	1	0.0293417	noncoding
XLOC_004072	TCONS_00008103	60	0.3215	9.21124	1	0.0277024	noncoding
XLOC_004073	TCONS_00008105	145	0.37341	9.54828	1	0.68909	coding
XLOC_004074	TCONS_00008106	58	0.43465	10.1451	1	0.0899606	noncoding
XLOC_004075	TCONS_00008107	23	0.37173	5.58746	-1	0.0162509	noncoding
XLOC_004076	TCONS_00008108	95	0.43122	5.05499	1	0.563721	coding
XLOC_004077	TCONS_00008110	56	0.4015	6.81366	-1	0.0293763	noncoding
XLOC_004078	TCONS_00008111	160	0.41202	9.72784	1	0.920304	coding
XLOC_004079	TCONS_00008112	46	0.3935	11.0804	1	0.0343632	noncoding
XLOC_004080	TCONS_00008113	113	0.35567	11.5876	1	0.198153	noncoding
XLOC_004081	TCONS_00008114	78	0.40936	9.20099	1	0.138139	noncoding
XLOC_004095	TCONS_00008167	20	0.40783	10.9033	1	0.0125884	noncoding
XLOC_004103	TCONS_00008179	7	0.45173	6.49139	1	1.83577e-05	noncoding
XLOC_004109	TCONS_00008191	24	0.39979	8.51874	1	0.00687306	noncoding
XLOC_004110	TCONS_00008194	42	0.40255	7.73956	1	0.016158	noncoding
XLOC_004117	TCONS_00008210	19	0.43942	5.75275	1	0.00593531	noncoding
XLOC_004118	TCONS_00008211	48	0.39378	8.97882	1	0.0258988	noncoding
XLOC_004119	TCONS_00008212	88	0.34691	8.8598	1	0.0980256	noncoding
XLOC_004120	TCONS_00008213	44	0.37488	10.2809	1	0.0249977	noncoding
XLOC_004125	TCONS_00008221	98	0.3272	9.74542	1	0.11699	noncoding
XLOC_004194	TCONS_00008329	117	0.42065	10.4129	1	0.59854	coding
XLOC_004195	TCONS_00008332	70	0.33414	9.45428	1	0.0453701	noncoding
XLOC_004262	TCONS_00008457	60	0.34346	10.0394	1	0.0365224	noncoding
XLOC_004330	TCONS_00008565	100	0.30159	9.0235	1	0.0967955	noncoding
XLOC_004331	TCONS_00008566	104	0.32971	9.81293	1	0.146004	noncoding
XLOC_004348	TCONS_00008603	79	0.25866	9.60077	1	0.0504601	noncoding
XLOC_004349	TCONS_00008604	175	0.27006	8.6767	1	0.483329	noncoding
XLOC_004350	TCONS_00008606	96	0.28035	5.73871	1	0.184749	noncoding
XLOC_004351	TCONS_00008609	117	0.32746	8.82587	1	0.2243	noncoding
XLOC_004367	TCONS_00008710	37	0.40178	5.75226	1	0.0148091	noncoding
XLOC_004396	TCONS_00008780	83	0.4557	10.2059	1	0.358282	noncoding
XLOC_004399	TCONS_00008784	31	0.33567	10.8155	1	0.0148732	noncoding
XLOC_004426	TCONS_00008886	54	0.46041	10.2829	1	0.117645	noncoding
XLOC_004427	TCONS_00008887	107	0.28982	6.49396	1	0.190832	noncoding
XLOC_004428	TCONS_00008890	59	0.27398	6.68024	1	0.0295437	noncoding
XLOC_004429	TCONS_00008891	34	0.41795	9.78217	1	0.0202906	noncoding
XLOC_004430	TCONS_00008892	65	0.32294	9.34271	1	0.0343735	noncoding
XLOC_004431	TCONS_00008893	73	0.33738	10.0681	-1	0.160336	noncoding
XLOC_004432	TCONS_00008894	55	0.28334	11.4196	1	0.0339621	noncoding
XLOC_004490	TCONS_00009031	62	0.42026	4.95001	-1	0.0256828	noncoding
XLOC_004491	TCONS_00009036	20	0.43396	9.98431	1	0.0127134	noncoding
XLOC_004492	TCONS_00009037	56	0.33567	8.13922	1	0.0212364	noncoding
XLOC_004493	TCONS_00009038	35	0.28222	9.36957	1	0.012983	noncoding
XLOC_004494	TCONS_00009039	95	0.38572	9.50275	1	0.212409	noncoding
XLOC_004608	TCONS_00009252	10	0.411	9.50006	1	0.00507116	noncoding
XLOC_004609	TCONS_00009253	3	0.36082	5.27496	1	8.2262e-06	noncoding
XLOC_004610	TCONS_00009254	14	0.35038	6.68805	1	1.8283e-05	noncoding
XLOC_004611	TCONS_00009255	0	0.41225	0	-1	0.0081303	noncoding
XLOC_004612	TCONS_00009256	103	0.33683	11.3566	1	0.129731	noncoding
XLOC_004614	TCONS_00009282	122	0.28423	9.99542	1	0.145581	noncoding
XLOC_004620	TCONS_00009300	88	0.30777	8.9151	1	0.0679789	noncoding
XLOC_004622	TCONS_00009302	66	0.32202	10.3061	1	0.0410749	noncoding
XLOC_004623	TCONS_00009304	88	0.34314	10.369	1	0.100412	noncoding
XLOC_004675	TCONS_00009421	43	0.32685	9.41559	1	0.0155741	noncoding
XLOC_004680	TCONS_00009430	41	0.3809	9.05035	1	0.0167594	noncoding
XLOC_004684	TCONS_00009437	77	0.42789	9.40887	1	0.173544	noncoding
XLOC_004685	TCONS_00009438	36	0.36778	9.93329	1	0.0157329	noncoding
XLOC_004686	TCONS_00009443	116	0.32433	9.15643	-1	0.155799	noncoding
XLOC_004687	TCONS_00009444	122	0.323	10.0778	1	0.223923	noncoding
XLOC_004688	TCONS_00009445	95	0.33289	8.96039	1	0.110556	noncoding
XLOC_004774	TCONS_00009560	128	0.28266	8.03705	1	0.223532	noncoding
XLOC_004775	TCONS_00009561	133	0.28683	9.25641	1	0.211901	noncoding
XLOC_004795	TCONS_00009596	57	0.35029	10.2889	1	0.0355059	noncoding
XLOC_004816	TCONS_00009666	109	0.34756	9.43329	1	0.215924	noncoding
XLOC_004817	TCONS_00009667	5	0.37068	5.27496	-1	0.0114806	noncoding
XLOC_004820	TCONS_00009671	104	0.31677	11.7156	1	0.097301	noncoding
XLOC_004821	TCONS_00009672	72	0.28474	9.94891	1	0.0415217	noncoding
XLOC_004857	TCONS_00009743	118	0.37915	8.95917	1	0.425573	noncoding
XLOC_004858	TCONS_00009744	25	0.35293	8.80414	1	0.0064096	noncoding
XLOC_004902	TCONS_00009837	119	0.30981	9.99506	1	0.176846	noncoding
XLOC_004903	TCONS_00009838	25	0.4783	9.69781	1	0.0286522	noncoding
XLOC_004904	TCONS_00009840	38	0.44379	11.468	-1	0.14518	noncoding
XLOC_004905	TCONS_00009841	100	0.33327	10.5826	1	0.130145	noncoding
XLOC_004906	TCONS_00009842	146	0.29367	9.96075	1	0.277823	noncoding
XLOC_004907	TCONS_00009843	96	0.29178	10.0539	1	0.0806857	noncoding
XLOC_004985	TCONS_00009971	100	0.33856	9.74078	1	0.142365	noncoding
XLOC_004986	TCONS_00009972	113	0.3176	9.83466	1	0.166049	noncoding
XLOC_004987	TCONS_00009973	55	0.31909	5.79144	1	0.0250111	noncoding
XLOC_004988	TCONS_00009976	24	0.36207	4.78046	1	0.00727959	noncoding
XLOC_005027	TCONS_00010051	4	0.41646	5.27496	1	1.67655e-05	noncoding
XLOC_005028	TCONS_00010052	93	0.34527	10.0375	1	0.121598	noncoding
XLOC_005040	TCONS_00010066	18	0.42167	5.75031	1	0.00509845	noncoding
XLOC_005041	TCONS_00010067	84	0.27661	6.15778	1	0.0961256	noncoding
XLOC_005042	TCONS_00010068	90	0.36705	9.38263	1	0.137901	noncoding
XLOC_005163	TCONS_00010242	34	0.36827	10.2978	1	0.015949	noncoding
XLOC_005229	TCONS_00010345	92	0.43254	4.96722	1	0.531183	coding
XLOC_005231	TCONS_00010346	105	0.38899	9.45184	1	0.316106	noncoding
XLOC_005232	TCONS_00010348	29	0.44099	11.2637	1	0.029335	noncoding
XLOC_005233	TCONS_00010349	39	0.3193	5.95941	1	0.010423	noncoding
XLOC_005234	TCONS_00010350	22	0.32245	9.3692	1	0.0069372	noncoding
XLOC_005237	TCONS_00010359	30	0.32467	9.89777	1	0.0111898	noncoding
XLOC_005238	TCONS_00010360	49	0.43537	8.50385	1	0.0380753	noncoding
XLOC_005239	TCONS_00010361	27	0.46082	8.51532	-1	0.0306851	noncoding
XLOC_005244	TCONS_00010390	115	0.28982	9.40021	1	0.134285	noncoding
XLOC_005245	TCONS_00010391	22	0.32286	10.8344	1	0.0115111	noncoding
XLOC_005246	TCONS_00010392	18	0.43049	8.34418	1	0.00588108	noncoding
XLOC_005247	TCONS_00010393	23	0.40438	9.10187	-1	0.0532546	noncoding
XLOC_005248	TCONS_00010394	59	0.34699	11.4532	-1	0.181673	noncoding
XLOC_005251	TCONS_00010430	43	0.36754	9.45538	1	0.0187228	noncoding
XLOC_005274	TCONS_00010468	41	0.41758	8.68378	1	0.021064	noncoding
XLOC_005275	TCONS_00010469	43	0.30289	9.22321	1	0.0146602	noncoding
XLOC_005288	TCONS_00010503	28	0.42552	8.34418	1	0.0100196	noncoding
XLOC_005299	TCONS_00010537	71	0.3775	10.0163	1	0.0758703	noncoding
XLOC_005300	TCONS_00010538	18	0.43142	4.20709	1	0.012178	noncoding
XLOC_005382	TCONS_00010653	94	0.31204	5.55194	1	0.179417	noncoding
XLOC_005383	TCONS_00010655	74	0.28576	9.50909	1	0.0414386	noncoding
XLOC_005385	TCONS_00010660	41	0.32723	9.21393	1	0.0136442	noncoding
XLOC_005414	TCONS_00010716	76	0.33942	9.92108	1	0.0625983	noncoding
XLOC_005415	TCONS_00010722	110	0.29115	9.09869	1	0.120343	noncoding
XLOC_005417	TCONS_00010724	112	0.29115	9.04498	1	0.128055	noncoding
XLOC_005420	TCONS_00010727	112	0.2895	9.0545	1	0.126254	noncoding
XLOC_005430	TCONS_00010747	56	0.34854	10.0724	1	0.0326516	noncoding
XLOC_005431	TCONS_00010748	119	0.29367	10.1568	1	0.146009	noncoding
XLOC_005482	TCONS_00010826	25	0.43124	6.48871	-1	0.0156561	noncoding
XLOC_005484	TCONS_00010828	26	0.35792	4.64935	1	0.00856861	noncoding
XLOC_005485	TCONS_00010829	60	0.3482	9.42926	1	0.0338208	noncoding
XLOC_005486	TCONS_00010830	65	0.37051	8.685	1	0.0450148	noncoding
XLOC_005496	TCONS_00010855	25	0.3195	10.2774	1	0.0108164	noncoding
XLOC_005525	TCONS_00010905	54	0.35729	9.34296	1	0.0275757	noncoding
XLOC_005531	TCONS_00010911	50	0.3332	7.71381	1	0.0153575	noncoding
XLOC_005532	TCONS_00010912	28	0.38244	6.4975	1	0.00618995	noncoding
XLOC_005533	TCONS_00010913	106	0.33148	9.77875	1	0.159019	noncoding
XLOC_005534	TCONS_00010914	27	0.36695	9.82208	1	0.0102937	noncoding
XLOC_005535	TCONS_00010915	30	0.39554	11.8393	1	0.0172289	noncoding
XLOC_005536	TCONS_00010921	107	0.34452	9.39594	1	0.194555	noncoding
XLOC_005587	TCONS_00011039	53	0.31105	9.2132	-1	0.152461	noncoding
XLOC_005658	TCONS_00011167	56	0.3697	11.2957	-1	0.173825	noncoding
XLOC_005659	TCONS_00011168	0	0.3598	0	-1	2.22309e-06	noncoding
XLOC_005661	TCONS_00011175	48	0.40102	9.1507	1	0.0289401	noncoding
XLOC_005662	TCONS_00011176	14	0.27538	6.70245	-1	0.107922	noncoding
XLOC_005663	TCONS_00011177	93	0.44169	11.7794	1	0.353068	noncoding
XLOC_005679	TCONS_00011215	26	0.38591	10.9162	1	0.0141432	noncoding
XLOC_005680	TCONS_00011217	81	0.37322	10.3027	-1	0.149514	noncoding
XLOC_005709	TCONS_00011256	101	0.33898	10.1476	1	0.146918	noncoding
XLOC_005711	TCONS_00011260	50	0.34779	9.05695	1	0.0204941	noncoding
XLOC_005712	TCONS_00011261	104	0.43246	9.35907	1	0.5	coding
XLOC_005807	TCONS_00011435	39	0.43407	7.87799	1	0.0184638	noncoding
XLOC_005808	TCONS_00011436	102	0.35493	9.1557	1	0.186314	noncoding
XLOC_005809	TCONS_00011437	60	0.36153	10.421	1	0.0438645	noncoding
XLOC_005827	TCONS_00011473	52	0.39991	7.78168	-1	0.0394113	noncoding
XLOC_005828	TCONS_00011474	81	0.33775	10.1569	1	0.0747797	noncoding
XLOC_005829	TCONS_00011475	108	0.28642	9.57306	1	0.107255	noncoding
XLOC_005830	TCONS_00011477	59	0.33887	9.62616	1	0.0317069	noncoding
XLOC_005831	TCONS_00011479	88	0.30387	9.94379	1	0.0697044	noncoding
XLOC_005832	TCONS_00011480	34	0.44517	10.5771	1	0.0362476	noncoding
XLOC_005833	TCONS_00011481	30	0.39193	11.0001	1	0.0174806	noncoding
XLOC_005834	TCONS_00011482	32	0.40271	10.9467	1	0.0205757	noncoding
XLOC_005835	TCONS_00011483	63	0.35784	4.50714	1	0.0846638	noncoding
XLOC_005836	TCONS_00011484	106	0.26083	9.32672	1	0.0934385	noncoding
XLOC_005846	TCONS_00011519	21	0.41633	10.0644	1	0.0114131	noncoding
XLOC_005847	TCONS_00011520	62	0.40077	9.4931	1	0.06153	noncoding
XLOC_005848	TCONS_00011521	54	0.403	11.398	-1	0.163525	noncoding
XLOC_005866	TCONS_00011556	27	0.3935	9.49884	1	0.010593	noncoding
XLOC_005867	TCONS_00011557	40	0.41067	9.39606	1	0.0227209	noncoding
XLOC_005882	TCONS_00011572	14	0.37896	5.58295	1	0.00316061	noncoding
XLOC_005883	TCONS_00011573	27	0.41344	3.67279	1	0.0292765	noncoding
XLOC_005884	TCONS_00011574	45	0.41739	10.4536	1	0.0404193	noncoding
XLOC_005885	TCONS_00011575	38	0.36809	10.8867	1	0.0207723	noncoding
XLOC_005886	TCONS_00011576	23	0.42621	9.78522	1	0.012655	noncoding
XLOC_005887	TCONS_00011577	17	0.39397	5.58746	1	0.00418692	noncoding
XLOC_005888	TCONS_00011578	89	0.44811	11.5136	1	0.373115	noncoding
XLOC_005889	TCONS_00011579	0	0.3272	0	-1	5.46972e-07	noncoding
XLOC_005890	TCONS_00011580	80	0.28191	9.25494	1	0.0478655	noncoding
XLOC_005891	TCONS_00011581	83	0.32681	9.94183	1	0.071493	noncoding
XLOC_005892	TCONS_00011583	42	0.28922	10.6668	1	0.0220424	noncoding
XLOC_005893	TCONS_00011584	3	0.34669	5.27472	-1	0.0148052	noncoding
XLOC_005894	TCONS_00011585	57	0.30411	9.29999	1	0.0240598	noncoding
XLOC_005910	TCONS_00011638	53	0.40046	10.0622	1	0.044822	noncoding
XLOC_005911	TCONS_00011639	32	0.3037	8.63287	1	0.00840571	noncoding
XLOC_005912	TCONS_00011640	18	0.30812	7.97601	1	0.00399958	noncoding
XLOC_005913	TCONS_00011641	48	0.34514	9.77631	1	0.0221064	noncoding
XLOC_005914	TCONS_00011642	53	0.27881	9.67633	1	0.0240253	noncoding
XLOC_005932	TCONS_00011689	100	0.27665	7.73553	1	0.0984475	noncoding
XLOC_005933	TCONS_00011691	19	0.41055	4.52972	1	0.00904425	noncoding
XLOC_005934	TCONS_00011692	41	0.32823	7.64325	1	0.00992571	noncoding
XLOC_005935	TCONS_00011693	50	0.30914	9.22235	1	0.0186646	noncoding
XLOC_005936	TCONS_00011694	47	0.32152	11.5816	1	0.0253505	noncoding
XLOC_005937	TCONS_00011696	60	0.42617	9.94366	1	0.0841617	noncoding
XLOC_006031	TCONS_00011892	13	0.40393	9.00677	1	0.00464629	noncoding
XLOC_006042	TCONS_00011908	29	0.37386	10.45	1	0.013804	noncoding
XLOC_006043	TCONS_00011909	89	0.34039	7.60638	1	0.0974249	noncoding
XLOC_006044	TCONS_00011910	29	0.38649	11.0688	1	0.0163248	noncoding
XLOC_006047	TCONS_00011913	32	0.31997	12.3074	1	0.0158242	noncoding
XLOC_006050	TCONS_00011916	59	0.3193	8.66193	1	0.0240309	noncoding
XLOC_006051	TCONS_00011917	37	0.36119	5.06012	1	0.0140236	noncoding
XLOC_006052	TCONS_00011918	61	0.37999	9.77704	1	0.0493337	noncoding
XLOC_006056	TCONS_00011922	105	0.3372	7.83124	1	0.179402	noncoding
XLOC_006057	TCONS_00011923	64	0.37798	9.05707	1	0.0489374	noncoding
XLOC_006058	TCONS_00011924	32	0.29326	4.42792	-1	0.0379	noncoding
XLOC_006059	TCONS_00011925	12	0.4258	11.166	-1	0.117628	noncoding
XLOC_006060	TCONS_00011926	41	0.36171	7.86859	-1	0.0532768	noncoding
XLOC_006061	TCONS_00011927	57	0.30846	9.42853	1	0.0248831	noncoding
XLOC_006062	TCONS_00011928	64	0.39086	9.30035	1	0.0583954	noncoding
XLOC_006063	TCONS_00011929	39	0.33068	8.73712	-1	0.108432	noncoding
XLOC_006064	TCONS_00011930	36	0.40788	9.69562	1	0.0197235	noncoding
XLOC_006067	TCONS_00011933	57	0.30564	9.58649	-1	0.167806	noncoding
XLOC_006068	TCONS_00011934	16	0.39786	9.30365	1	0.00587373	noncoding
XLOC_006069	TCONS_00011935	54	0.33722	12.0125	-1	0.174515	noncoding
XLOC_006070	TCONS_00011936	77	0.299	9.94183	1	0.0492522	noncoding
XLOC_006072	TCONS_00011938	52	0.32796	7.86591	1	0.0167233	noncoding
XLOC_006073	TCONS_00011939	52	0.27326	10.0163	1	0.0262104	noncoding
XLOC_006074	TCONS_00011940	9	0.33878	8.50006	1	0.00279725	noncoding
XLOC_006087	TCONS_00011958	82	0.34159	6.9494	1	0.0783174	noncoding
XLOC_006087	TCONS_00011959	93	0.32826	10.4213	1	0.100811	noncoding
XLOC_006223	TCONS_00012116	65	0.31964	9.68195	1	0.0357594	noncoding
XLOC_006223	TCONS_00012117	50	0.35942	4.76495	1	0.0348795	noncoding
XLOC_006223	TCONS_00012118	65	0.37729	9.68195	1	0.0562787	noncoding
XLOC_006223	TCONS_00012119	50	0.41232	4.76495	1	0.0598354	noncoding
XLOC_006224	TCONS_00012120	72	0.278	9.48273	1	0.0390887	noncoding
XLOC_006224	TCONS_00012121	56	0.35014	5.53839	-1	0.0308562	noncoding
XLOC_006224	TCONS_00012122	46	0.32398	5.36261	-1	0.0367279	noncoding
XLOC_006224	TCONS_00012123	68	0.33366	10.1773	1	0.0463919	noncoding
XLOC_006253	TCONS_00012162	76	0.29367	9.15619	1	0.0430339	noncoding
XLOC_006268	TCONS_00012193	91	0.32799	9.63898	1	0.0931205	noncoding
XLOC_006275	TCONS_00012200	157	0.36172	9.23041	1	0.756171	coding
XLOC_006282	TCONS_00012209	88	0.29676	5.56244	1	0.137128	noncoding
XLOC_006282	TCONS_00012210	88	0.26766	5.56244	1	0.170696	noncoding
XLOC_006289	TCONS_00012217	61	0.37472	8.83844	1	0.0397255	noncoding
XLOC_006289	TCONS_00012218	61	0.37553	8.83844	1	0.040033	noncoding
XLOC_006289	TCONS_00012219	39	0.39896	7.96234	1	0.0136514	noncoding
XLOC_006311	TCONS_00012244	58	0.33567	10.9595	-1	0.18046	noncoding
XLOC_006312	TCONS_00012245	58	0.41241	10.9283	1	0.0703164	noncoding
XLOC_006313	TCONS_00012246	44	0.34991	4.68195	1	0.0238515	noncoding
XLOC_006314	TCONS_00012247	13	0.3462	9.50006	1	0.00491004	noncoding
XLOC_006315	TCONS_00012248	94	0.31204	7.64703	1	0.0932638	noncoding
XLOC_006323	TCONS_00012257	106	0.32402	8.81769	1	0.149033	noncoding
XLOC_006352	TCONS_00012293	0	0.30478	0	-1	4.85676e-07	noncoding
XLOC_006353	TCONS_00012294	38	0.32462	10.0923	1	0.0156938	noncoding
XLOC_006354	TCONS_00012295	20	0.33446	9.50006	1	0.00660459	noncoding
XLOC_006355	TCONS_00012296	44	0.3759	10.5433	1	0.0263441	noncoding
XLOC_006356	TCONS_00012297	44	0.36447	9.74774	1	0.0207028	noncoding
XLOC_006357	TCONS_00012298	76	0.35947	9.20013	1	0.0702701	noncoding
XLOC_006359	TCONS_00012300	139	0.37959	10.0783	1	0.635471	coding
XLOC_006359	TCONS_00012301	139	0.29343	10.0783	1	0.233754	noncoding
XLOC_006359	TCONS_00012302	139	0.36573	10.0783	1	0.56204	coding
XLOC_006359	TCONS_00012303	139	0.35909	10.0783	1	0.525609	coding
XLOC_006359	TCONS_00012304	139	0.30235	10.0783	1	0.261025	noncoding
XLOC_006363	TCONS_00012309	236	0.37617	9.75409	1	0.992903	coding
XLOC_006364	TCONS_00012310	103	0.30843	10.5831	1	0.10912	noncoding
XLOC_006365	TCONS_00012311	45	0.32131	10.4285	1	0.0214291	noncoding
XLOC_006403	TCONS_00012374	68	0.35564	8.73724	1	0.0452373	noncoding
XLOC_006404	TCONS_00012377	52	0.42146	6.88324	1	0.0342272	noncoding
XLOC_006405	TCONS_00012378	37	0.32413	9.38239	1	0.0122501	noncoding
XLOC_006405	TCONS_00012379	67	0.31027	9.83392	1	0.0375133	noncoding
XLOC_006414	TCONS_00012401	37	0.29611	10.4639	1	0.0177843	noncoding
XLOC_006415	TCONS_00012402	46	0.39366	7.66876	1	0.0185902	noncoding
XLOC_006416	TCONS_00012403	22	0.41804	4.64935	1	0.0108886	noncoding
XLOC_006417	TCONS_00012404	33	0.39324	10.2182	1	0.0174092	noncoding
XLOC_006418	TCONS_00012405	48	0.38549	10.2889	1	0.0322279	noncoding
XLOC_006419	TCONS_00012406	52	0.39406	11.3036	1	0.0434751	noncoding
XLOC_006420	TCONS_00012407	74	0.3833	9.39471	1	0.0856692	noncoding
XLOC_006421	TCONS_00012408	26	0.41021	9.86493	1	0.012948	noncoding
XLOC_006422	TCONS_00012409	50	0.2941	9.36957	1	0.0194657	noncoding
XLOC_006436	TCONS_00012441	60	0.31204	8.63507	1	0.0243028	noncoding
XLOC_006437	TCONS_00012442	103	0.40135	7.7796	1	0.347705	noncoding
XLOC_006438	TCONS_00012443	79	0.3238	12.1075	1	0.0494945	noncoding
XLOC_006439	TCONS_00012444	86	0.31596	9.09589	1	0.0680446	noncoding
XLOC_006441	TCONS_00012446	64	0.28919	10.3963	1	0.0360855	noncoding
XLOC_006442	TCONS_00012447	16	0.32324	5.19403	1	0.00380201	noncoding
XLOC_006443	TCONS_00012448	38	0.32122	8.01764	1	0.00906295	noncoding
XLOC_006445	TCONS_00012450	30	0.3684	10.4612	1	0.0141015	noncoding
XLOC_006454	TCONS_00012466	25	0.31119	8.88751	1	0.00676936	noncoding
XLOC_006455	TCONS_00012467	68	0.32719	10.244	1	0.044809	noncoding
XLOC_006457	TCONS_00012470	35	0.45005	4.94452	1	0.0249151	noncoding
XLOC_006458	TCONS_00012471	23	0.33729	4.57111	1	0.00702097	noncoding
XLOC_006459	TCONS_00012472	24	0.39765	5.0401	1	0.00845189	noncoding
XLOC_006465	TCONS_00012483	30	0.41423	9.52264	1	0.0146818	noncoding
XLOC_006466	TCONS_00012484	19	0.36415	10.0524	1	0.00785257	noncoding
XLOC_006488	TCONS_00012527	98	0.32954	10.2054	1	0.119781	noncoding
XLOC_006489	TCONS_00012528	13	0.37211	9.30353	1	0.00459385	noncoding
XLOC_006490	TCONS_00012529	76	0.4071	9.49738	1	0.127098	noncoding
XLOC_006491	TCONS_00012530	108	0.3631	11.3382	1	0.206477	noncoding
XLOC_006522	TCONS_00012568	49	0.29745	10.2022	1	0.0230363	noncoding
XLOC_006523	TCONS_00012569	39	0.39935	11.4516	-1	0.158996	noncoding
XLOC_006524	TCONS_00012570	66	0.36024	9.90021	1	0.0514188	noncoding
XLOC_006525	TCONS_00012571	39	0.36428	4.42731	1	0.0224841	noncoding
XLOC_006526	TCONS_00012573	54	0.36241	10.9532	-1	0.168204	noncoding
XLOC_006527	TCONS_00012574	4	0.36475	5.27472	1	9.47631e-06	noncoding
XLOC_006528	TCONS_00012575	23	0.43081	3.91632	1	0.0212266	noncoding
XLOC_006529	TCONS_00012576	53	0.3328	7.81586	1	0.0177496	noncoding
XLOC_006530	TCONS_00012577	79	0.24076	10.0447	1	0.0625747	noncoding
XLOC_006549	TCONS_00012629	77	0.34571	6.20538	1	0.0762375	noncoding
XLOC_006551	TCONS_00012635	71	0.33985	9.86237	1	0.0520443	noncoding
XLOC_006551	TCONS_00012636	71	0.35788	9.86237	1	0.0610474	noncoding
XLOC_006565	TCONS_00012651	63	0.32878	5.53864	1	0.0423309	noncoding
XLOC_006565	TCONS_00012652	63	0.33007	5.53864	1	0.0425103	noncoding
XLOC_006565	TCONS_00012653	98	0.30419	8.7912	1	0.093072	noncoding
XLOC_006565	TCONS_00012654	207	0.37649	9.52936	1	0.976562	coding
XLOC_006567	TCONS_00012676	79	0.36493	11.4626	1	0.0835571	noncoding
XLOC_006568	TCONS_00012677	87	0.35889	11.8321	-1	0.175695	noncoding
XLOC_006570	TCONS_00012679	92	0.35853	9.78046	1	0.136502	noncoding
XLOC_006571	TCONS_00012680	79	0.30725	5.58624	1	0.0891927	noncoding
XLOC_006583	TCONS_00012692	102	0.3238	10.4484	1	0.125401	noncoding
XLOC_006584	TCONS_00012693	52	0.3238	9.10468	1	0.0201777	noncoding
XLOC_006590	TCONS_00012714	116	0.29116	8.45148	1	0.154006	noncoding
XLOC_006591	TCONS_00012715	51	0.38235	12.2302	1	0.0292036	noncoding
XLOC_006599	TCONS_00012740	32	0.424	8.84149	-1	0.0442578	noncoding
XLOC_006600	TCONS_00012741	25	0.36241	4.21881	1	0.0104527	noncoding
XLOC_006601	TCONS_00012742	14	0.41023	8.51874	-1	0.0340591	noncoding
XLOC_006602	TCONS_00012745	46	0.41273	8.01788	1	0.0230568	noncoding
XLOC_006663	TCONS_00012898	25	0.28133	9.41815	1	0.00990037	noncoding
XLOC_006664	TCONS_00012899	68	0.37899	11.5488	1	0.0650423	noncoding
XLOC_006676	TCONS_00012914	19	0.324	10.8599	1	0.0105278	noncoding
XLOC_006681	TCONS_00012921	26	0.40151	4.20709	1	0.0163235	noncoding
XLOC_006707	TCONS_00013012	67	0.33713	9.6911	1	0.0429201	noncoding
XLOC_006727	TCONS_00013051	50	0.42528	9.94	1	0.0512895	noncoding
XLOC_006733	TCONS_00013080	44	0.35007	8.65656	-1	0.0867056	noncoding
XLOC_006734	TCONS_00013081	25	0.39605	7.97748	1	0.00616098	noncoding
XLOC_006735	TCONS_00013082	29	0.33549	7.815	1	0.00583148	noncoding
XLOC_006736	TCONS_00013083	25	0.39927	12.0085	1	0.0139911	noncoding
XLOC_006737	TCONS_00013084	103	0.36525	10.6569	1	0.20887	noncoding
XLOC_006738	TCONS_00013085	109	0.30981	9.7558	1	0.135786	noncoding
XLOC_006739	TCONS_00013086	38	0.42681	7.82318	1	0.016127	noncoding
XLOC_006768	TCONS_00013128	104	0.40108	11.6697	1	0.275943	noncoding
XLOC_006769	TCONS_00013129	112	0.3918	9.58771	1	0.405054	noncoding
XLOC_006770	TCONS_00013130	69	0.48039	6.69147	1	0.128933	noncoding
XLOC_006798	TCONS_00013187	34	0.37106	9.00824	-1	0.0757754	noncoding
XLOC_006809	TCONS_00013205	89	0.35877	9.77704	1	0.122458	noncoding
XLOC_006810	TCONS_00013207	52	0.40656	11.3266	-1	0.158816	noncoding
XLOC_006811	TCONS_00013208	81	0.41781	11.7859	1	0.160583	noncoding
XLOC_006819	TCONS_00013226	51	0.3406	7.8465	1	0.0167818	noncoding
XLOC_006850	TCONS_00013313	37	0.38473	9.86505	1	0.0178849	noncoding
XLOC_006851	TCONS_00013314	58	0.33547	10.4285	-1	0.17	noncoding
XLOC_006890	TCONS_00013374	53	0.3305	10.4443	-1	0.173424	noncoding
XLOC_006891	TCONS_00013375	94	0.38438	9.1424	1	0.198273	noncoding
XLOC_006892	TCONS_00013376	85	0.2891	9.77643	1	0.058468	noncoding
XLOC_006894	TCONS_00013378	87	0.28584	8.2663	1	0.0595322	noncoding
XLOC_006913	TCONS_00013440	30	0.36023	8.18939	1	0.00698167	noncoding
XLOC_006914	TCONS_00013441	4	0.42624	5.27496	1	1.85947e-05	noncoding
XLOC_006915	TCONS_00013442	17	0.33143	10.3013	1	0.00805774	noncoding
XLOC_006947	TCONS_00013516	42	0.40157	9.4931	1	0.023582	noncoding
XLOC_006948	TCONS_00013518	64	0.33482	11.3466	-1	0.180625	noncoding
XLOC_006951	TCONS_00013525	66	0.36543	8.73553	1	0.0452306	noncoding
XLOC_006955	TCONS_00013530	42	0.33073	7.82294	1	0.0106354	noncoding
XLOC_006956	TCONS_00013531	61	0.32213	9.83112	1	0.0323689	noncoding
XLOC_006957	TCONS_00013532	36	0.42524	11.3814	1	0.0318314	noncoding
XLOC_006958	TCONS_00013533	43	0.32537	10.1679	1	0.0189977	noncoding
XLOC_006959	TCONS_00013534	23	0.32936	8.27423	1	0.00493623	noncoding
XLOC_006964	TCONS_00013608	0	0.38456	0	-1	1.45424e-05	noncoding
XLOC_006973	TCONS_00013627	50	0.26107	9.69489	1	0.0256311	noncoding
XLOC_006976	TCONS_00013632	79	0.32477	5.59613	1	0.0920451	noncoding
XLOC_006977	TCONS_00013633	99	0.29771	9.80084	1	0.0909659	noncoding
XLOC_006978	TCONS_00013635	55	0.40795	8.53668	1	0.0391527	noncoding
XLOC_006979	TCONS_00013636	96	0.29543	9.36395	1	0.0815489	noncoding
XLOC_006980	TCONS_00013637	138	0.32237	7.62946	1	0.458851	noncoding
XLOC_006980	TCONS_00013638	138	0.32237	7.62946	1	0.458851	noncoding
XLOC_006981	TCONS_00013639	40	0.44331	9.49664	1	0.0346873	noncoding
XLOC_006982	TCONS_00013641	32	0.40455	9.42999	1	0.0144484	noncoding
XLOC_006988	TCONS_00013647	35	0.2764	9.51056	1	0.0142396	noncoding
XLOC_006998	TCONS_00013663	106	0.37389	9.71906	1	0.270754	noncoding
XLOC_006999	TCONS_00013664	25	0.39896	8.4964	1	0.00716597	noncoding
XLOC_007000	TCONS_00013665	22	0.39308	6.50153	-1	0.017881	noncoding
XLOC_007001	TCONS_00013666	46	0.41825	7.90204	-1	0.0345754	noncoding
XLOC_007007	TCONS_00013672	21	0.36094	7.95526	-1	0.0475492	noncoding
XLOC_007008	TCONS_00013673	56	0.31718	9.2453	1	0.0236578	noncoding
XLOC_007009	TCONS_00013674	40	0.32086	5.5733	1	0.0123257	noncoding
XLOC_007010	TCONS_00013679	42	0.34448	9.8316	1	0.0176723	noncoding
XLOC_007019	TCONS_00013692	2	0.39544	5.27496	-1	0.00940894	noncoding
XLOC_007034	TCONS_00013714	43	0.29128	5.27191	1	0.0204759	noncoding
XLOC_007095	TCONS_00013826	65	0.34723	6.89996	1	0.03564	noncoding
XLOC_007130	TCONS_00013882	33	0.31902	10.1774	1	0.0136281	noncoding
XLOC_007131	TCONS_00013883	60	0.4156	11.3693	1	0.0772758	noncoding
XLOC_007132	TCONS_00013884	26	0.47272	8.51898	1	0.0152614	noncoding
XLOC_007226	TCONS_00014147	93	0.31266	8.56769	1	0.0841526	noncoding
XLOC_007231	TCONS_00014166	52	0.4424	4.70123	1	0.0857978	noncoding
XLOC_007236	TCONS_00014174	53	0.32149	10.1684	1	0.0263164	noncoding
XLOC_007238	TCONS_00014176	155	0.30981	7.70697	1	0.58206	coding
XLOC_007245	TCONS_00014193	81	0.37103	10.0878	1	0.105719	noncoding
XLOC_007246	TCONS_00014194	45	0.32069	10.2189	1	0.0204283	noncoding
XLOC_007247	TCONS_00014195	53	0.38082	8.71136	-1	0.0689776	noncoding
XLOC_007248	TCONS_00014196	26	0.41861	11.888	1	0.0178031	noncoding
XLOC_007249	TCONS_00014197	55	0.3622	8.37347	-1	0.0726827	noncoding
XLOC_007250	TCONS_00014198	41	0.33863	8.38104	1	0.011382	noncoding
XLOC_007252	TCONS_00014203	4	0.46737	5.27496	1	1.86703e-05	noncoding
XLOC_007253	TCONS_00014204	16	0.35676	10.8599	1	0.00884407	noncoding
XLOC_007427	TCONS_00014536	139	0.29283	9.1214	1	0.267274	noncoding
XLOC_007429	TCONS_00014540	53	0.36604	6.53632	1	0.0230007	noncoding
XLOC_007454	TCONS_00014615	32	0.37735	6.68146	1	0.00742967	noncoding
XLOC_007475	TCONS_00014673	77	0.31852	9.69342	1	0.0535622	noncoding
XLOC_007476	TCONS_00014674	89	0.29745	9.47638	1	0.0671471	noncoding
XLOC_007477	TCONS_00014675	48	0.31645	8.75262	1	0.0157218	noncoding
XLOC_007541	TCONS_00014800	98	0.38032	7.7027	1	0.226171	noncoding
XLOC_007550	TCONS_00014811	36	0.2769	10.5457	1	0.0202683	noncoding
XLOC_007594	TCONS_00015069	61	0.35297	10.0339	1	0.0405454	noncoding
XLOC_007602	TCONS_00015083	38	0.32267	11.61	-1	0.188402	noncoding
XLOC_007603	TCONS_00015084	11	0.37571	3.56342	1	0.00717745	noncoding
XLOC_007604	TCONS_00015086	32	0.34304	5.89691	1	0.00723345	noncoding
XLOC_007605	TCONS_00015088	147	0.26261	9.39886	1	0.228946	noncoding
XLOC_007607	TCONS_00015090	65	0.32442	9.16229	1	0.0336473	noncoding
XLOC_007608	TCONS_00015091	104	0.28567	7.81757	1	0.112803	noncoding
XLOC_007626	TCONS_00015142	120	0.30344	9.69501	1	0.17285	noncoding
XLOC_007639	TCONS_00015172	102	0.28923	10.1259	1	0.0925768	noncoding
XLOC_007640	TCONS_00015173	87	0.31762	5.24091	1	0.15505	noncoding
XLOC_007642	TCONS_00015175	114	0.38128	11.1695	-1	0.187038	noncoding
XLOC_007681	TCONS_00015229	50	0.41255	6.06281	1	0.0330071	noncoding
XLOC_007695	TCONS_00015256	29	0.36855	11.5552	1	0.0152824	noncoding
XLOC_007699	TCONS_00015264	41	0.4359	8.18011	1	0.0224825	noncoding
XLOC_007700	TCONS_00015265	27	0.42214	7.97601	1	0.00837136	noncoding
XLOC_007701	TCONS_00015266	53	0.43815	7.99933	-1	0.0364816	noncoding
XLOC_007702	TCONS_00015267	64	0.2765	6.80646	1	0.0337332	noncoding
XLOC_007706	TCONS_00015280	43	0.35262	10.082	1	0.0202432	noncoding
XLOC_007707	TCONS_00015281	28	0.3352	8.31427	1	0.00621285	noncoding
XLOC_007750	TCONS_00015379	128	0.38549	9.82318	1	0.558405	coding
XLOC_007752	TCONS_00015381	57	0.36168	12.0042	1	0.0342405	noncoding
XLOC_007759	TCONS_00015433	64	0.39365	10.3207	1	0.0698588	noncoding
XLOC_007763	TCONS_00015444	39	0.35667	4.94452	-1	0.0192202	noncoding
XLOC_007778	TCONS_00015495	93	0.3799	6.79865	1	0.205806	noncoding
XLOC_007778	TCONS_00015496	86	0.42258	8.88153	1	0.225744	noncoding
XLOC_007778	TCONS_00015497	56	0.3825	7.73871	1	0.029106	noncoding
XLOC_007816	TCONS_00015575	10	0.35525	6.49139	1	1.19212e-05	noncoding
XLOC_007817	TCONS_00015576	59	0.37518	9.42914	1	0.0404969	noncoding
XLOC_007818	TCONS_00015577	118	0.35049	10.1578	1	0.283726	noncoding
XLOC_007820	TCONS_00015579	31	0.40039	7.93402	1	0.00879557	noncoding
XLOC_007821	TCONS_00015580	42	0.33887	10.3839	1	0.0198548	noncoding
XLOC_007825	TCONS_00015587	55	0.30981	8.51947	1	0.0196174	noncoding
XLOC_007826	TCONS_00015588	24	0.37576	11.0002	1	0.0126472	noncoding
XLOC_007848	TCONS_00015702	35	0.38689	4.55658	1	0.0201613	noncoding
XLOC_007849	TCONS_00015704	87	0.37794	7.60419	1	0.13495	noncoding
XLOC_007850	TCONS_00015705	33	0.32802	11.5689	1	0.0172643	noncoding
XLOC_007857	TCONS_00015721	53	0.35978	10.5056	1	0.0334968	noncoding
XLOC_007863	TCONS_00015739	29	0.29594	10.878	1	0.0162182	noncoding
XLOC_007864	TCONS_00015740	40	0.33926	11.4389	1	0.0210016	noncoding
XLOC_007902	TCONS_00015869	60	0.31899	8.84235	1	0.0256826	noncoding
XLOC_007907	TCONS_00015878	41	0.33829	6.36298	1	0.0105902	noncoding
XLOC_007924	TCONS_00015949	32	0.36081	11.5406	-1	0.180787	noncoding
XLOC_007924	TCONS_00015950	32	0.42369	11.5406	-1	0.14802	noncoding
XLOC_007924	TCONS_00015951	32	0.37828	11.5406	-1	0.170609	noncoding
XLOC_007958	TCONS_00016057	58	0.39808	10.7911	1	0.0588312	noncoding
XLOC_007959	TCONS_00016060	14	0.33639	9.99249	1	0.00635091	noncoding
XLOC_007972	TCONS_00016079	56	0.29772	4.74908	1	0.0477515	noncoding
XLOC_007997	TCONS_00016154	13	0.36899	5.27472	-1	0.0130982	noncoding
XLOC_008006	TCONS_00016178	115	0.29367	10.502	1	0.128591	noncoding
XLOC_008008	TCONS_00016180	61	0.31126	9.65289	1	0.0299962	noncoding
XLOC_008012	TCONS_00016184	90	0.35513	10.6418	1	0.121307	noncoding
XLOC_008013	TCONS_00016185	87	0.304	9.46002	1	0.065759	noncoding
XLOC_008021	TCONS_00016207	32	0.40259	9.992	-1	0.0904396	noncoding
XLOC_008023	TCONS_00016210	43	0.39371	7.93353	-1	0.0399687	noncoding
XLOC_008024	TCONS_00016211	27	0.3644	4.74921	1	0.00902063	noncoding
XLOC_008025	TCONS_00016213	21	0.41712	9.99628	1	0.0112364	noncoding
XLOC_008026	TCONS_00016214	0	0.35737	0	-1	1.91288e-06	noncoding
XLOC_008041	TCONS_00016242	60	0.32114	11.5413	1	0.0356273	noncoding
XLOC_008046	TCONS_00016247	16	0.36958	11.2637	1	0.00950433	noncoding
XLOC_008048	TCONS_00016256	58	0.38392	11.6108	1	0.0470432	noncoding
XLOC_008049	TCONS_00016257	77	0.34869	10.1876	1	0.0722184	noncoding
XLOC_008050	TCONS_00016258	80	0.30346	9.29999	1	0.0516977	noncoding
XLOC_008051	TCONS_00016259	18	0.42873	8.50006	1	0.00610481	noncoding
XLOC_008052	TCONS_00016260	19	0.38809	6.81488	1	0.00368754	noncoding
XLOC_008053	TCONS_00016262	17	0.40393	9.3493	1	0.00652658	noncoding
XLOC_008055	TCONS_00016265	62	0.41425	7.51471	1	0.0554933	noncoding
XLOC_008056	TCONS_00016266	72	0.37123	10.6511	1	0.0764648	noncoding
XLOC_008057	TCONS_00016267	108	0.32762	8.83783	1	0.166341	noncoding
XLOC_008058	TCONS_00016268	47	0.43373	9.03546	1	0.038547	noncoding
XLOC_008059	TCONS_00016269	96	0.31684	9.43353	1	0.0978275	noncoding
XLOC_008060	TCONS_00016270	21	0.39437	6.51727	-1	0.017557	noncoding
XLOC_008061	TCONS_00016271	20	0.37034	9.82208	1	0.00766479	noncoding
XLOC_008062	TCONS_00016272	116	0.32181	9.12604	1	0.198803	noncoding
XLOC_008063	TCONS_00016273	24	0.35305	8.21222	1	0.00512709	noncoding
XLOC_008064	TCONS_00016274	17	0.39184	5.75299	1	0.00391977	noncoding
XLOC_008065	TCONS_00016275	136	0.33686	9.29865	1	0.4128	noncoding
XLOC_008066	TCONS_00016276	41	0.3602	8.93903	1	0.0142737	noncoding
XLOC_008067	TCONS_00016277	34	0.4074	6.52972	1	0.0106134	noncoding
XLOC_008068	TCONS_00016278	40	0.33199	8.93927	1	0.0122704	noncoding
XLOC_008069	TCONS_00016279	79	0.46732	4.90302	-1	0.046386	noncoding
XLOC_008070	TCONS_00016280	36	0.41594	8.88068	1	0.0166917	noncoding
XLOC_008071	TCONS_00016281	112	0.29367	10.0814	1	0.123484	noncoding
XLOC_008072	TCONS_00016282	42	0.40343	9.43622	1	0.0236391	noncoding
XLOC_008073	TCONS_00016283	25	0.39676	3.83417	-1	0.0118635	noncoding
XLOC_008075	TCONS_00016287	33	0.28978	9.65387	-1	0.183115	noncoding
XLOC_008076	TCONS_00016288	72	0.32373	10.6142	1	0.0513174	noncoding
XLOC_008077	TCONS_00016289	71	0.32131	9.8924	-1	0.165251	noncoding
XLOC_008078	TCONS_00016290	116	0.3363	9.24738	1	0.236343	noncoding
XLOC_008079	TCONS_00016291	82	0.32165	9.5191	1	0.0639532	noncoding
XLOC_008080	TCONS_00016292	25	0.31078	11.723	1	0.0152711	noncoding
XLOC_008081	TCONS_00016293	16	0.41753	9.69708	-1	0.0625546	noncoding
XLOC_008092	TCONS_00016309	22	0.34933	9.00665	1	0.00596734	noncoding
XLOC_008093	TCONS_00016310	59	0.34179	9.38141	1	0.0307963	noncoding
XLOC_008094	TCONS_00016311	63	0.37234	11.1834	1	0.0542949	noncoding
XLOC_008095	TCONS_00016312	117	0.31381	8.9483	1	0.188864	noncoding
XLOC_008106	TCONS_00016335	55	0.36482	5.58002	1	0.033578	noncoding
XLOC_008115	TCONS_00016349	8	0.36081	9.3493	-1	0.0865539	noncoding
XLOC_008116	TCONS_00016354	73	0.36263	10.2864	1	0.0718468	noncoding
XLOC_008117	TCONS_00016355	11	0.37737	8.02338	1	0.00266854	noncoding
XLOC_008118	TCONS_00016358	41	0.30613	6.94171	1	0.0101481	noncoding
XLOC_008119	TCONS_00016359	73	0.3102	9.8172	1	0.0453024	noncoding
XLOC_008120	TCONS_00016361	34	0.3337	9.38287	1	0.0110071	noncoding
XLOC_008289	TCONS_00016632	54	0.36211	9.51886	1	0.0296611	noncoding
XLOC_008290	TCONS_00016633	16	0.36249	6.49139	1	0.00281847	noncoding
XLOC_008291	TCONS_00016634	50	0.2765	11.0168	1	0.0307154	noncoding
XLOC_008292	TCONS_00016635	11	0.3614	7.99982	1	0.00257072	noncoding
XLOC_008293	TCONS_00016637	127	0.36871	9.04498	1	0.481879	noncoding
XLOC_008294	TCONS_00016638	33	0.37646	7.70612	1	0.00806446	noncoding
XLOC_008295	TCONS_00016639	66	0.4711	9.16254	1	0.179948	noncoding
XLOC_008358	TCONS_00016772	62	0.36343	6.88409	-1	0.0436281	noncoding
XLOC_008359	TCONS_00016773	39	0.3118	9.05731	1	0.0120187	noncoding
XLOC_008360	TCONS_00016774	39	0.34848	11.8854	1	0.0195888	noncoding
XLOC_008361	TCONS_00016776	21	0.32555	9.81976	1	0.00787852	noncoding
XLOC_008367	TCONS_00016796	84	0.30792	8.49408	1	0.0584381	noncoding
XLOC_008372	TCONS_00016804	13	0.40536	5.27496	-1	0.0110033	noncoding
XLOC_008373	TCONS_00016805	73	0.38	12.0195	1	0.0660936	noncoding
XLOC_008384	TCONS_00016825	115	0.29501	9.30133	1	0.141788	noncoding
XLOC_008385	TCONS_00016826	69	0.30068	11.8005	1	0.0415683	noncoding
XLOC_008388	TCONS_00016830	47	0.41414	9.77606	1	0.0370598	noncoding
XLOC_008390	TCONS_00016832	129	0.2895	9.23407	1	0.197412	noncoding
XLOC_008392	TCONS_00016834	77	0.3277	9.21759	1	0.054496	noncoding
XLOC_008422	TCONS_00016899	52	0.34763	9.87164	1	0.0267701	noncoding
XLOC_008423	TCONS_00016903	92	0.35424	9.24396	1	0.127066	noncoding
XLOC_008424	TCONS_00016904	74	0.34696	6.52325	1	0.0605378	noncoding
XLOC_008425	TCONS_00016907	53	0.38711	5.9726	1	0.0319736	noncoding
XLOC_008426	TCONS_00016908	50	0.34617	10.6668	1	0.0283515	noncoding
XLOC_008436	TCONS_00016933	41	0.39146	12.1288	1	0.0230336	noncoding
XLOC_008439	TCONS_00016946	88	0.33454	6.33453	1	0.11448	noncoding
XLOC_008440	TCONS_00016947	41	0.40708	8.0589	1	0.0166252	noncoding
XLOC_008441	TCONS_00016948	37	0.42125	11.539	1	0.0310965	noncoding
XLOC_008487	TCONS_00017060	53	0.38921	10.45	-1	0.131467	noncoding
XLOC_008510	TCONS_00017113	65	0.33624	9.29523	1	0.0370619	noncoding
XLOC_008511	TCONS_00017114	89	0.28648	9.95624	1	0.0652011	noncoding
XLOC_008512	TCONS_00017115	26	0.3406	9.30267	1	0.00780605	noncoding
XLOC_008513	TCONS_00017116	42	0.39725	11.0065	1	0.0301106	noncoding
XLOC_008514	TCONS_00017117	44	0.36248	8.84454	-1	0.0819492	noncoding
XLOC_008515	TCONS_00017118	35	0.42945	10.5338	1	0.0298623	noncoding
XLOC_008516	TCONS_00017119	44	0.3786	9.61786	1	0.0220456	noncoding
XLOC_008517	TCONS_00017120	25	0.42367	5.98627	1	0.0075752	noncoding
XLOC_008523	TCONS_00017131	7	0.38783	5.27277	1	1.72547e-05	noncoding
XLOC_008579	TCONS_00017328	89	0.32882	9.65717	1	0.0877532	noncoding
XLOC_008603	TCONS_00017377	17	0.40064	6.49103	1	0.00358743	noncoding
XLOC_008661	TCONS_00017499	70	0.34128	10.4184	1	0.0537608	noncoding
XLOC_008662	TCONS_00017501	127	0.32322	11.3118	1	0.201956	noncoding
XLOC_008669	TCONS_00017510	39	0.34875	11.2352	1	0.0206162	noncoding
XLOC_008670	TCONS_00017511	68	0.44436	9.38226	1	0.143318	noncoding
XLOC_008672	TCONS_00017514	37	0.29367	8.84271	1	0.0111115	noncoding
XLOC_008673	TCONS_00017515	94	0.32296	11.2452	1	0.0911568	noncoding
XLOC_008674	TCONS_00017516	43	0.44505	11.7241	1	0.0571796	noncoding
XLOC_008679	TCONS_00017540	84	0.31528	8.2326	-1	0.12828	noncoding
XLOC_008680	TCONS_00017541	44	0.43982	10.123	1	0.0490063	noncoding
XLOC_008681	TCONS_00017542	30	0.43544	10.8344	-1	0.111639	noncoding
XLOC_008682	TCONS_00017543	33	0.30996	6.69012	1	0.00703668	noncoding
XLOC_008683	TCONS_00017544	39	0.3283	10.0523	-1	0.162796	noncoding
XLOC_008684	TCONS_00017545	34	0.34995	9.49469	1	0.0118092	noncoding
XLOC_008685	TCONS_00017546	56	0.29452	11.363	1	0.0329095	noncoding
XLOC_008686	TCONS_00017547	117	0.38478	10.5513	1	0.404588	noncoding
XLOC_008705	TCONS_00017584	16	0.46203	12.0001	1	0.0225428	noncoding
XLOC_008723	TCONS_00017629	25	0.31496	5.5849	1	0.00572912	noncoding
XLOC_008729	TCONS_00017657	79	0.32651	8.65289	-1	0.126755	noncoding
XLOC_008730	TCONS_00017658	56	0.37029	10.0124	1	0.037929	noncoding
XLOC_008731	TCONS_00017659	60	0.28243	10.4482	1	0.0333976	noncoding
XLOC_008732	TCONS_00017661	32	0.29454	6.81085	1	0.00744246	noncoding
XLOC_008735	TCONS_00017667	61	0.36507	9.20074	1	0.0387408	noncoding
XLOC_008736	TCONS_00017668	90	0.35244	10.0316	1	0.118927	noncoding
XLOC_008738	TCONS_00017673	34	0.338	9.49811	1	0.0114897	noncoding
XLOC_008785	TCONS_00017769	51	0.39559	11.7003	1	0.0397174	noncoding
XLOC_008786	TCONS_00017770	64	0.30553	7.75616	1	0.0264944	noncoding
XLOC_008791	TCONS_00017782	37	0.40028	12.0042	1	0.022316	noncoding
XLOC_008792	TCONS_00017783	149	0.38064	9.84222	1	0.748502	coding
XLOC_008793	TCONS_00017785	65	0.3823	10.2949	1	0.0641171	noncoding
XLOC_008794	TCONS_00017786	55	0.35312	9.185	-1	0.108354	noncoding
XLOC_008866	TCONS_00017960	30	0.31673	10.0224	1	0.0117931	noncoding
XLOC_008874	TCONS_00017974	88	0.35584	8.59308	1	0.107276	noncoding
XLOC_008875	TCONS_00017975	60	0.39602	9.06317	-1	0.075619	noncoding
XLOC_008876	TCONS_00017976	75	0.35518	10.8386	1	0.0723897	noncoding
XLOC_008877	TCONS_00017977	27	0.31626	6.68341	1	0.00512006	noncoding
XLOC_008878	TCONS_00017978	59	0.35296	8.72382	1	0.0295052	noncoding
XLOC_008879	TCONS_00017979	42	0.44826	4.60187	1	0.048457	noncoding
XLOC_008880	TCONS_00017980	21	0.30842	3.99884	1	0.0100647	noncoding
XLOC_008881	TCONS_00017981	60	0.38674	10.2236	1	0.0540625	noncoding
XLOC_008882	TCONS_00017982	139	0.38833	9.62177	-1	0.159614	noncoding
XLOC_008883	TCONS_00017983	32	0.4198	11.4756	1	0.0247828	noncoding
XLOC_008884	TCONS_00017984	86	0.36304	9.58319	1	0.113591	noncoding
XLOC_008885	TCONS_00017985	14	0.30266	11.166	1	0.0114452	noncoding
XLOC_008886	TCONS_00017986	47	0.39383	7.99908	1	0.0203719	noncoding
XLOC_008887	TCONS_00017987	38	0.31757	8.97931	1	0.0112897	noncoding
XLOC_008888	TCONS_00017988	40	0.37009	11.9128	1	0.0211824	noncoding
XLOC_008889	TCONS_00017989	93	0.40857	9.59528	1	0.264191	noncoding
XLOC_008890	TCONS_00017990	14	0.32757	9.3493	1	0.00499461	noncoding
XLOC_008891	TCONS_00017991	58	0.28434	8.03217	1	0.021699	noncoding
XLOC_008892	TCONS_00017992	81	0.29889	10.0993	-1	0.171774	noncoding
XLOC_008893	TCONS_00017993	38	0.38979	3.79462	1	0.0417144	noncoding
XLOC_008894	TCONS_00017994	42	0.30965	4.23688	1	0.027668	noncoding
XLOC_008895	TCONS_00017995	39	0.35577	8.13971	1	0.010558	noncoding
XLOC_008896	TCONS_00017996	46	0.34161	9.30084	1	0.0178271	noncoding
XLOC_008927	TCONS_00018030	67	0.38356	6.50922	1	0.0597149	noncoding
XLOC_008927	TCONS_00018031	67	0.38631	6.50922	1	0.0614737	noncoding
XLOC_008927	TCONS_00018032	67	0.35796	6.50922	1	0.0463817	noncoding
XLOC_008927	TCONS_00018033	67	0.30595	6.50922	1	0.036047	noncoding
XLOC_008932	TCONS_00018037	67	0.40054	10.0141	1	0.0835485	noncoding
XLOC_008933	TCONS_00018038	55	0.30241	7.88361	1	0.018392	noncoding
XLOC_008934	TCONS_00018039	48	0.36487	7.95392	1	0.0169293	noncoding
XLOC_008935	TCONS_00018040	76	0.35273	9.3017	1	0.0663657	noncoding
XLOC_008936	TCONS_00018041	19	0.42112	12.0085	-1	0.155201	noncoding
XLOC_008937	TCONS_00018042	50	0.3247	8.83929	1	0.0176522	noncoding
XLOC_008938	TCONS_00018043	29	0.33553	7.97809	1	0.00601528	noncoding
XLOC_008939	TCONS_00018044	75	0.41843	9.43231	1	0.139903	noncoding
XLOC_008940	TCONS_00018045	14	0.27359	7.93842	-1	0.151371	noncoding
XLOC_008941	TCONS_00018046	36	0.28812	8.80121	1	0.010966	noncoding
XLOC_008942	TCONS_00018047	76	0.38257	9.12079	1	0.0898974	noncoding
XLOC_008943	TCONS_00018048	82	0.30078	9.30011	1	0.0543765	noncoding
XLOC_008944	TCONS_00018049	54	0.41019	10.6857	1	0.0570285	noncoding
XLOC_008945	TCONS_00018050	40	0.30486	10.4465	1	0.0186708	noncoding
XLOC_008946	TCONS_00018052	14	0.36209	3.79938	1	0.00666799	noncoding
XLOC_008960	TCONS_00018070	52	0.31849	8.18939	1	0.0168646	noncoding
XLOC_008994	TCONS_00018116	127	0.35797	9.76642	1	0.408417	noncoding
XLOC_008994	TCONS_00018117	127	0.35792	9.76642	1	0.40817	noncoding
XLOC_009000	TCONS_00018127	20	0.31549	7.99908	1	0.00420229	noncoding
XLOC_009001	TCONS_00018128	64	0.34092	10.3541	1	0.0432955	noncoding
XLOC_009002	TCONS_00018129	42	0.27774	10.3062	1	0.0215532	noncoding
XLOC_009003	TCONS_00018130	20	0.29409	7.81085	1	0.00469116	noncoding
XLOC_009009	TCONS_00018140	36	0.45117	4.64935	1	0.0316058	noncoding
XLOC_009031	TCONS_00018173	70	0.3908	9.01324	1	0.0740222	noncoding
XLOC_009031	TCONS_00018174	70	0.33988	9.01324	1	0.0446177	noncoding
XLOC_009031	TCONS_00018175	70	0.33171	9.01324	1	0.041899	noncoding
XLOC_009031	TCONS_00018177	40	0.319	9.57806	1	0.0144641	noncoding
XLOC_009031	TCONS_00018180	31	0.31998	9.62469	1	0.0106309	noncoding
XLOC_009034	TCONS_00018179	67	0.29717	10.3006	1	0.0386764	noncoding
XLOC_009045	TCONS_00018197	60	0.40014	9.7818	1	0.0585791	noncoding
XLOC_009046	TCONS_00018198	51	0.34032	10.5457	1	0.0281406	noncoding
XLOC_009058	TCONS_00018210	66	0.35501	8.71088	1	0.0409951	noncoding
XLOC_009071	TCONS_00018243	84	0.32438	9.64093	1	0.0708268	noncoding
XLOC_009072	TCONS_00018244	33	0.33513	8.18793	1	0.00755459	noncoding
XLOC_009073	TCONS_00018245	57	0.27275	8.9577	1	0.0241594	noncoding
XLOC_009114	TCONS_00018338	102	0.32277	10.6397	1	0.122204	noncoding
XLOC_009115	TCONS_00018344	140	0.34103	9.3465	1	0.473004	noncoding
XLOC_009120	TCONS_00018359	33	0.2875	9.06439	1	0.010717	noncoding
XLOC_009134	TCONS_00018375	63	0.31653	5.96771	1	0.0351763	noncoding
XLOC_009136	TCONS_00018377	70	0.43001	4.22467	1	0.301358	noncoding
XLOC_009141	TCONS_00018383	35	0.38228	8.73724	1	0.0115553	noncoding
XLOC_009142	TCONS_00018384	353	0.32364	7.99591	1	0.999904	coding
XLOC_009142	TCONS_00018385	342	0.34414	7.0307	1	0.999983	coding
XLOC_009142	TCONS_00018386	341	0.31337	7.54572	1	0.999836	coding
XLOC_009142	TCONS_00018387	342	0.32364	7.0307	1	0.999952	coding
XLOC_009142	TCONS_00018389	275	0.33879	9.07953	1	0.996202	coding
XLOC_009143	TCONS_00018388	56	0.44558	8.81671	-1	0.0528976	noncoding
XLOC_009165	TCONS_00018437	17	0.42866	8.36591	1	0.00550557	noncoding
XLOC_009166	TCONS_00018438	40	0.32542	4.82635	-1	0.0273476	noncoding
XLOC_009170	TCONS_00018445	36	0.28787	9.38263	1	0.0129266	noncoding
XLOC_009171	TCONS_00018446	51	0.35256	9.18378	1	0.0226586	noncoding
XLOC_009172	TCONS_00018453	18	0.321	10.3013	1	0.0086314	noncoding
XLOC_009173	TCONS_00018454	6	0.39015	3.99884	1	0.00444935	noncoding
XLOC_009174	TCONS_00018455	16	0.33438	10.0009	1	0.00689583	noncoding
XLOC_009175	TCONS_00018457	29	0.35413	11.1054	1	0.014682	noncoding
XLOC_009194	TCONS_00018500	48	0.3912	8.93463	-1	0.0671941	noncoding
XLOC_009195	TCONS_00018502	48	0.33878	10.2809	1	0.024043	noncoding
XLOC_009196	TCONS_00018503	73	0.35182	5.74615	1	0.0765348	noncoding
XLOC_009197	TCONS_00018504	19	0.37904	9.98431	-1	0.100883	noncoding
XLOC_009198	TCONS_00018505	150	0.36001	9.24835	1	0.683444	coding
XLOC_009203	TCONS_00018522	72	0.34296	9.88727	1	0.0555822	noncoding
XLOC_009204	TCONS_00018523	58	0.423	9.3017	1	0.0639413	noncoding
XLOC_009205	TCONS_00018524	34	0.42085	4.68256	-1	0.01601	noncoding
XLOC_009249	TCONS_00018886	36	0.34342	9.03558	1	0.0109608	noncoding
XLOC_009250	TCONS_00018887	74	0.34563	8.58759	1	0.0528987	noncoding
XLOC_009255	TCONS_00018928	31	0.30486	4.84613	1	0.01155	noncoding
XLOC_009262	TCONS_00018940	31	0.31924	9.30402	-1	0.142607	noncoding
XLOC_009263	TCONS_00018941	83	0.29452	11.8397	1	0.0542597	noncoding
XLOC_009264	TCONS_00018942	48	0.35187	5.58746	1	0.0203149	noncoding
XLOC_009274	TCONS_00018966	33	0.32244	8.5058	1	0.00811813	noncoding
XLOC_009275	TCONS_00018967	62	0.39822	10.2999	1	0.0674926	noncoding
XLOC_009276	TCONS_00018968	33	0.44473	9.30353	1	0.0225884	noncoding
XLOC_009277	TCONS_00018969	26	0.36848	9.40045	1	0.00858834	noncoding
XLOC_009281	TCONS_00018982	35	0.42394	9.49738	1	0.0208681	noncoding
XLOC_009282	TCONS_00018985	9	0.42933	6.51617	1	0.00256279	noncoding
XLOC_009283	TCONS_00018986	77	0.45342	5.98724	1	0.215603	noncoding
XLOC_009285	TCONS_00019017	53	0.46358	11.8393	-1	0.175338	noncoding
XLOC_009286	TCONS_00019018	31	0.3713	9.03497	-1	0.0751009	noncoding
XLOC_009287	TCONS_00019019	15	0.421	9.10138	-1	0.0435237	noncoding
XLOC_009288	TCONS_00019020	39	0.36117	9.62665	1	0.0158871	noncoding
XLOC_009295	TCONS_00019041	64	0.28923	10.082	1	0.0342526	noncoding
XLOC_009300	TCONS_00019046	91	0.31793	8.26483	1	0.0822761	noncoding
XLOC_009309	TCONS_00019069	17	0.36649	9.98431	1	0.0070743	noncoding
XLOC_009310	TCONS_00019070	18	0.40157	7.99884	-1	0.0294039	noncoding
XLOC_009311	TCONS_00019071	79	0.34369	8.75458	1	0.0651063	noncoding
XLOC_009374	TCONS_00019237	73	0.31622	9.74738	1	0.0464515	noncoding
XLOC_009384	TCONS_00019277	32	0.31021	7.83466	1	0.00694176	noncoding
XLOC_009385	TCONS_00019280	108	0.38951	10.9357	1	0.319018	noncoding
XLOC_009422	TCONS_00019389	33	0.37645	5.41046	1	0.0106132	noncoding
XLOC_009426	TCONS_00019404	157	0.32469	9.19342	1	0.561361	coding
XLOC_009432	TCONS_00019421	8	0.44207	5.58539	-1	0.0106358	noncoding
XLOC_009434	TCONS_00019423	52	0.43841	11.8826	1	0.0712696	noncoding
XLOC_009436	TCONS_00019426	58	0.32689	8.71967	-1	0.119777	noncoding
XLOC_009451	TCONS_00019444	25	0.40634	12.1761	1	0.013947	noncoding
XLOC_009452	TCONS_00019445	11	0.36932	3.66571	1	0.00632282	noncoding
XLOC_009453	TCONS_00019446	50	0.37637	8.88788	1	0.0240511	noncoding
XLOC_009454	TCONS_00019447	49	0.34139	9.38422	-1	0.125509	noncoding
XLOC_009456	TCONS_00019450	47	0.35883	10.0897	1	0.0245494	noncoding
XLOC_009460	TCONS_00019458	57	0.35566	4.41315	1	0.0620488	noncoding
XLOC_009461	TCONS_00019459	71	0.33662	7.8786	1	0.0414253	noncoding
XLOC_009462	TCONS_00019460	44	0.2921	10.017	1	0.0193418	noncoding
XLOC_009463	TCONS_00019461	42	0.41255	8.6828	-1	0.0485216	noncoding
XLOC_009464	TCONS_00019462	36	0.31413	11.1054	1	0.0187165	noncoding
XLOC_009465	TCONS_00019463	91	0.37675	10.2021	1	0.165478	noncoding
XLOC_009468	TCONS_00019491	31	0.32853	10.2889	1	0.0130687	noncoding
XLOC_009470	TCONS_00019493	122	0.29607	9.60211	1	0.169394	noncoding
XLOC_009478	TCONS_00019518	27	0.439	7.8609	1	0.00939765	noncoding
XLOC_009479	TCONS_00019519	28	0.43224	7.78876	1	0.0092873	noncoding
XLOC_009480	TCONS_00019520	25	0.42743	8.96698	1	0.0105483	noncoding
XLOC_009481	TCONS_00019521	34	0.32181	9.77594	1	0.0124113	noncoding
XLOC_009482	TCONS_00019522	100	0.33391	10.0939	1	0.134301	noncoding
XLOC_009505	TCONS_00019583	87	0.30644	10.8499	1	0.0700931	noncoding
XLOC_009506	TCONS_00019585	15	0.44229	8.34503	1	0.00546124	noncoding
XLOC_009507	TCONS_00019588	59	0.28635	9.74323	1	0.0280745	noncoding
XLOC_009508	TCONS_00019590	86	0.40185	8.75153	1	0.172601	noncoding
XLOC_009509	TCONS_00019591	41	0.3307	5.50909	1	0.0131574	noncoding
XLOC_009514	TCONS_00019600	15	0.41669	9.4964	1	0.00684238	noncoding
XLOC_009515	TCONS_00019601	25	0.4105	4.78339	1	0.0115528	noncoding
XLOC_009516	TCONS_00019602	101	0.32465	9.46417	1	0.125314	noncoding
XLOC_009517	TCONS_00019603	59	0.40115	11.0086	-1	0.152793	noncoding
XLOC_009518	TCONS_00019604	28	0.35249	9.87164	1	0.0104752	noncoding
XLOC_009519	TCONS_00019605	131	0.3195	10.2004	1	0.265518	noncoding
XLOC_009527	TCONS_00019622	15	0.37231	4.50568	1	0.00508963	noncoding
XLOC_009530	TCONS_00019632	43	0.40568	7.82501	1	0.017753	noncoding
XLOC_009531	TCONS_00019633	132	0.3307	9.5451	1	0.338905	noncoding
XLOC_009532	TCONS_00019634	16	0.41624	9.00751	1	0.00593346	noncoding
XLOC_009533	TCONS_00019635	59	0.39576	9.88116	1	0.0541724	noncoding
XLOC_009534	TCONS_00019636	39	0.3982	9.49689	1	0.019756	noncoding
XLOC_009541	TCONS_00019651	26	0.37467	8.04535	-1	0.0433976	noncoding
XLOC_009542	TCONS_00019652	54	0.35252	9.49347	1	0.0275698	noncoding
XLOC_009545	TCONS_00019657	16	0.26682	5.27496	1	0.00993205	noncoding
XLOC_009546	TCONS_00019658	52	0.30821	9.92096	1	0.0235283	noncoding
XLOC_009547	TCONS_00019664	117	0.32663	9.39996	1	0.214028	noncoding
XLOC_009552	TCONS_00019684	89	0.30191	9.33075	1	0.0685975	noncoding
XLOC_009553	TCONS_00019685	123	0.29547	10.4755	1	0.157861	noncoding
[truncated: 3,252 more rows]

## Sheet: Table S2D
Gene ID	% Variance Explained by Alignment Bias	Alignment Bias Effect P-value	Alignment Bias Effect FDR	Sex Effect P-value	Sex Effect FDR	Wolbachia Effect P-value	Wolbachia Effect FDR	Sex × Wolbachia Interaction P-value	Sex × Wolbachia Interaction FDR	H2	Line Effect P-value	Line Effect FDR	Sex × Line Interaction P-value	Sex × Line Interaction FDR
[truncated: 17,088 more rows]

[truncated: 3 more sheets: Table S2E, Table S2F, Table S2G]
