# Supplementary material for: Gene expression networks in the Drosophila Genetic Reference Panel
Source: HighWire-hosted journal article supplement (doi:10.1101/gr.257592.119), 2020-03-01
Supplement: Supplemental_Table_S4.xlsx.xlsx [file Supplemental_Table_S4.xlsx.xlsx]

## Sheet: Female eQTLs
FlyBase ID	Chromosome	Gene Start (bp)	Gene End (bp)	Strand	Selected eQTLs	cis-eQTLs	cis-eQTL P-Value(s)	Intra-arm trans-eQTLs	Intra-arm trans-eQTL P-Value(s)	Inter-arm trans-eQTLs	Inter-arm trans-eQTL P-Value(s)
FBgn0000024	3R	9048673	9085239	-	3R_9084889_INS(cis),3L_4668586_SNP(trans-inter-arm),3R_9685535_SNP(trans-intra-arm)	3R_9085082_SNP,3R_9084889_INS,3R_9084882_SNP,3R_9048209_SNP,3R_9047891_SNP,3R_9085620_SNP,3R_9049484_SNP,3R_9047880_DEL,3R_9086218_DEL,3R_9048524_SNP	3.87e-15,1.287e-12,1.04e-10,3.666e-10,5.917e-10,2.18e-08,4.213e-07,5.196e-07,5.396e-07,9.611e-07	3R_9074085_DEL,3R_9039464_SNP,3R_9061324_SNP,3R_9044770_SNP,3R_9039173_SNP,3R_9082022_SNP,3R_8992097_SNP,3R_9074688_SNP,3R_9057662_SNP,3R_9034954_SNP,3R_9058169_SNP,3R_9098738_SNP,3R_9068080_DEL,3R_8985007_SNP,3R_9060202_SNP,3R_9075824_SNP,3R_9115988_INS,3R_9068834_DEL,3R_9017060_SNP,3R_9059643_SNP,3R_9074070_SNP,3R_9091730_SNP,3R_9050878_SNP,3R_9074900_DEL,3R_9081769_SNP,3R_8936668_SNP,3R_910498…	2.963e-17,5.231e-16,1.891e-15,3.501e-15,3.589e-15,1.374e-14,1.472e-14,1.842e-14,2.272e-14,2.514e-14,3.125e-14,3.178e-14,3.281e-14,4.079e-14,4.463e-14,4.463e-14,5.538e-14,6.609e-14,8.911e-14,1.027e-13,1.051e-13,1.171e-13,1.368e-13,1.78e-13,1.786e-13,1.968e-13,2.039e-13,2.039e-13,2.289e-13,2.393e-13,2.63e-13,2.923e-13,3.103e-13,3.244e-13,3.288e-13,3.343e-13,3.679e-13,3.798e-13,3.98e-13,5.018e-13,5.…	2R_13810014_SNP,2R_15043628_SNP,3L_14390116_SNP,2L_14301149_SNP,3L_2986948_SNP,3L_4668586_SNP,3L_3619508_SNP,3L_9973293_SNP,2L_20381326_SNP,X_19971726_SNP,2L_20381404_SNP,2R_13810590_SNP,X_19871910_SNP,3L_16428606_SNP	7.3e-07,8.016e-07,9.274e-07,2.389e-06,2.953e-06,3.566e-06,3.604e-06,3.753e-06,4.195e-06,4.408e-06,4.949e-06,5.411e-06,5.623e-06,7.763e-06
FBgn0000032	3R	25816866	25819133	-	2R_17622275_SNP(trans-inter-arm)					2R_17622275_SNP	3.16e-09
FBgn0000046	3R	9251705	9254097	+	3R_22306104_SNP(trans-intra-arm)			3R_22306104_SNP	1.009e-08
FBgn0000055	2L	14615552	14618902	+	2L_14628857_SNP(trans-intra-arm),2L_14513764_DEL(trans-intra-arm)			2L_14628857_SNP,2L_14513764_DEL,2L_14577357_SNP,2L_14513757_SNP,2L_14513786_SNP,2L_14513789_SNP,2L_14577964_SNP,2L_14513742_SNP,2L_14513721_INS,2L_14581309_DEL,2L_14620101_SNP,2L_14513538_SNP,2L_14620864_SNP,2L_14514955_SNP,2L_14628851_SNP,2L_14621321_SNP,2L_14513741_SNP	8.081e-11,8.901e-11,2.861e-10,7.088e-10,9.478e-10,1.445e-09,1.517e-09,2.259e-09,5.802e-09,8.499e-09,1.167e-08,1.692e-08,1.915e-08,7.419e-08,7.607e-08,7.625e-08,9.833e-08
FBgn0000079	2R	13006141	13007808	-	2R_13007819_SNP(cis)	2R_13007827_SNP,2R_13007819_SNP,2R_13007777_SNP,2R_13007954_SNP,2R_13008082_SNP,2R_13008060_SNP,2R_13008202_SNP,2R_13008027_SNP	6.215e-21,1.106e-19,1.486e-18,5.938e-14,1.994e-12,1.155e-11,7.311e-09,9.83e-09	2R_13015014_SNP,2R_13009348_SNP	3.279e-09,2.991e-08
FBgn0000092	X	2586765	2587919	-	X_2588453_SNP(cis)	X_2588453_SNP,X_2588082_INS,X_2588414_SNP,X_2587620_SNP	1.342e-12,2.852e-12,8.008e-11,3.447e-09
FBgn0000139	3R	20475847	20479098	+	3R_20477151_SNP(trans-intra-arm)			3R_20477151_SNP	4.831e-09
FBgn0000146	2L	10997819	11001476	-	X_12937470_SNP(trans-inter-arm)					X_12937470_SNP	2.049e-10
FBgn0000287	2L	11358873	11373636	+	2L_11359102_SNP(cis)	2L_11359102_SNP,2L_11359623_SNP,2L_11358338_SNP,2L_11358794_SNP,2L_11358614_SNP,2L_11359396_SNP	1.709e-13,4.743e-11,1.686e-10,8.05e-10,8.355e-10,4.025e-09	2L_11362270_DEL	2.981e-08	2R_16073138_SNP	6.196e-08
FBgn0000339	2L	16309292	16310726	-	2L_19602058_SNP(trans-intra-arm)			2L_19602058_SNP	1.404e-08
FBgn0000382	X	1988267	2009734	+	X_2006892_SNP(trans-intra-arm),2R_10076037_SNP(trans-inter-arm)			X_2006892_SNP,X_2002956_SNP,X_2002906_SNP,X_2006476_SNP,X_2008278_SNP,X_2002300_SNP,X_2002292_SNP,X_2005110_SNP,X_1998909_SNP	1.132e-09,2.602e-09,1.012e-08,1.837e-08,2.244e-08,2.344e-08,2.672e-08,3.621e-08,2.518e-07	2R_10076037_SNP	3.059e-07
FBgn0000394	X	5584035	5587117	+	X_5583969_SNP(cis)	X_5583969_SNP,X_5583989_SNP	2.505e-22,3.58e-19	X_5585691_SNP,X_5580763_SNP,X_5588282_SNP,X_5588305_SNP,X_5580161_SNP	1.521e-12,1.863e-11,2.123e-08,2.621e-08,6.375e-08
FBgn0000406	2L	16788774	16790721	-	3R_12625924_SNP(trans-inter-arm)					3R_12625924_SNP	1.492e-08
FBgn0000447	3R	4477113	4478638	-	3R_4478482_SNP(cis),3L_19822376_SNP(trans-inter-arm)	3R_4478482_SNP,3R_4479017_SNP,3R_4477063_SNP,3R_4478769_SNP,3R_4477060_SNP	4.006e-15,1.377e-11,5.045e-07,5.197e-07,7.215e-07	3R_4483695_SNP,3R_4485213_SNP,3R_4484834_SNP,3R_4484678_SNP,3R_4539187_SNP,3R_4537931_SNP,3R_4484812_SNP,3R_4484811_SNP,3R_4528183_SNP,3R_4484378_SNP,3R_4522969_SNP,3R_4484423_SNP,3R_4485523_SNP,3R_4554065_SNP,3R_4496927_SNP,3R_4499450_SNP,3R_4516391_SNP,3R_4484792_SNP,3R_4504312_SNP,3R_4468018_SNP,3R_4593500_SNP,3R_4504084_SNP,3R_4488587_SNP,3R_4470729_SNP,3R_4538342_SNP,3R_4497274_SNP,3R_452998…	6.436e-13,1.028e-11,2.993e-11,1.485e-10,2.499e-10,2.572e-10,4.727e-10,6.635e-10,7.007e-10,8.176e-10,9.161e-10,1.764e-09,3.829e-09,4.693e-09,4.904e-08,6.639e-08,9.784e-08,1.121e-07,1.212e-07,1.666e-07,1.82e-07,1.93e-07,2.334e-07,2.853e-07,2.869e-07,2.92e-07,3.222e-07,3.344e-07,3.481e-07,5.701e-07,5.934e-07,6.805e-07,6.943e-07,7.353e-07	3L_19822376_SNP	3.318e-07
FBgn0000455	3R	8237531	8239481	-	3R_8232862_SNP(trans-intra-arm)			3R_8209974_SNP,3R_8232862_SNP,3R_8208678_SNP,3R_8246176_SNP,3R_8283455_SNP,3R_8277644_DEL,3R_8246665_SNP,3R_8349556_SNP,3R_8347006_SNP,3R_8255297_SNP,3R_8194980_SNP,3R_8361127_SNP,3R_8376432_SNP,3R_8194981_DEL,3R_8179980_SNP,3R_8339960_SNP,3R_8374182_SNP,3R_8394727_SNP,3R_8409502_SNP,3R_8204363_SNP,3R_8247227_SNP,3R_8187843_SNP,3R_8391205_SNP,3R_8378821_SNP,3R_8196252_SNP,3R_8249773_SNP,3R_845568…	1.373e-44,7.586e-43,8.185e-40,1.106e-36,2.783e-35,9.756e-35,2.166e-34,1.876e-33,2.817e-33,5.24e-31,1.774e-30,1.028e-28,6.374e-27,1.402e-25,8.695e-25,1.978e-21,2.178e-21,2.69e-21,6.075e-20,7.062e-19,7.495e-19,9.791e-18,3.193e-17,4.545e-17,1.389e-16,1.596e-16,5.964e-16,1.673e-15,2.842e-15,6.683e-15,1.022e-14,1.525e-14,2.627e-14,4.182e-14,4.879e-14,6.452e-14,1.087e-13,1.327e-13,1.631e-13,4.862e-13,9…	3L_18831416_SNP,3L_21586281_SNP,3L_19319950_SNP,3L_19319908_SNP,3L_9646223_INS	5.821e-09,2.306e-08,2.876e-08,5.523e-08,6.646e-08
FBgn0000546	2R	1975378	2056592	-	2L_11728623_SNP(trans-inter-arm),3R_17660445_SNP(trans-inter-arm),2L_11388925_SNP(trans-inter-arm)			2R_18297099_SNP	5.355e-10	2L_11728623_SNP,2L_11186250_SNP,2L_11186305_SNP,2L_11388925_SNP,3R_17660445_SNP,2L_11185647_SNP	3.042e-11,6.56e-11,6.56e-11,1.688e-10,4.723e-10,6.226e-10
FBgn0000575	3L	749400	753492	+	3L_750336_SNP(cis)	3L_750336_SNP,3L_750014_SNP,3L_750030_SNP	2.654e-09,2.614e-08,2.351e-07	3L_752480_SNP,3L_752491_SNP,3L_743618_SNP,3L_743607_SNP	1.528e-08,1.235e-07,1.891e-07,1.893e-07
FBgn0000579	2L	1724768	1729636	-	2L_1728799_SNP(cis)	2L_1728706_SNP,2L_1728695_SNP,2L_1728798_SNP,2L_1728662_DEL,2L_1728799_SNP,2L_1728697_SNP,2L_1728689_SNP,2L_1728780_DEL,2L_1730292_SNP	5.418e-08,6.852e-08,9.59e-08,9.601e-08,9.601e-08,1.204e-07,1.253e-07,1.888e-07,4.568e-07	2L_1727330_SNP,2L_1727895_SNP,2L_1727363_SNP,2L_1731078_SNP,2L_1728635_SNP,2L_1728365_SNP	3.297e-08,9.037e-08,9.601e-08,2.19e-07,2.772e-07,3.256e-07
FBgn0000588	2L	11827204	11829405	-	2L_11199721_SNP(trans-intra-arm)			2L_11199721_SNP,2L_11199726_SNP	8.204e-09,6.298e-08
FBgn0000629	3L	10627675	10631230	-	3L_10630925_SNP(cis)	3L_10630897_SNP,3L_10630876_SNP,3L_10630925_SNP,3L_10630891_SNP,3L_10630930_SNP,3L_10630902_DEL,3L_10630745_SNP,3L_10630679_DEL,3L_10630590_SNP,3L_10630326_SNP,3L_10631089_SNP,3L_10631927_DEL,3L_10630805_SNP,3L_10631918_SNP	2.832e-13,2.907e-13,3.821e-13,7.683e-13,1.56e-12,4.226e-11,9.533e-11,9.815e-11,1.055e-10,1.656e-08,2.856e-08,4.698e-08,8.958e-08,1.327e-07	3L_10629872_SNP,3L_10629887_SNP	1.719e-08,5.01e-08
FBgn0000723	3R	5193325	5220268	-	3R_5201127_SNP(trans-intra-arm),2R_6620347_SNP(trans-inter-arm)	3R_5193787_SNP,3R_5220718_SNP	3.387e-11,2.618e-08	3R_5201127_SNP,3R_5194775_SNP,3R_5210318_SNP,3R_5210552_SNP,3R_5211196_SNP,3R_5204536_SNP,3R_5204332_DEL,3R_5153907_SNP,3R_5213339_SNP,3R_5217431_SNP,3R_5153958_SNP,3R_5153951_SNP,3R_5196076_SNP,3R_5213184_SNP,3R_5374385_SNP	3.915e-14,7.526e-13,2.572e-12,1.969e-11,4.685e-11,1.971e-10,1.07e-09,1.624e-09,1.886e-09,2.524e-09,4.675e-09,6.691e-09,1.143e-08,2.188e-08,3.279e-08	2R_6620347_SNP,3L_11053794_SNP	1.892e-08,2.01e-08
FBgn0000964	2L	19464267	19467758	+	2L_19555368_SNP(trans-intra-arm)			2L_19555368_SNP,2L_19553960_SNP,2L_19561783_SNP	2.652e-11,1.424e-10,1.138e-09
FBgn0001085	3L	14267443	14361739	+	3L_14267432_SNP(cis),3L_16744173_SNP(trans-intra-arm)	3L_14267392_SNP,3L_14267798_SNP,3L_14267432_SNP	1.375e-13,2.132e-13,6.634e-12	3L_14268610_SNP,3L_14266361_SNP,3L_14258230_SNP,3L_14258302_SNP,3L_14254881_DEL,3L_14270423_SNP,3L_14259661_SNP,3L_14286756_SNP,3L_14258161_SNP,3L_14258232_INS,3L_14258162_SNP,3L_14258314_SNP,3L_14252563_SNP,3L_14258326_SNP,3L_14254893_SNP,3L_14278864_SNP,3L_14254875_SNP,3L_14251649_DEL,3L_14247342_SNP,3L_14252548_SNP,3L_14271311_SNP,3L_14274874_SNP,3L_14253829_SNP,3L_14290900_SNP,3L_14235880_SNP…	1.617e-14,1.081e-13,2.14e-13,3.195e-13,6.901e-13,8.175e-13,8.416e-13,2.28e-12,3.205e-12,3.498e-12,7.917e-12,1.046e-11,1.303e-11,1.468e-11,2.766e-11,3.799e-11,4.16e-11,4.598e-11,6.072e-11,6.312e-11,8.564e-11,9.862e-11,1.056e-10,1.395e-10,1.488e-10,1.541e-10,2.199e-10,2.448e-10,2.658e-10,2.951e-10,2.988e-10,3.578e-10,3.924e-10,4.126e-10,4.668e-10,5.193e-10,6.554e-10,6.727e-10,8.921e-10,1.674e-09,1.…	3R_13550938_SNP,3R_27089953_SNP	1.207e-08,1.036e-07
FBgn0001090	X	18688279	18691720	-	2L_3155548_SNP(trans-inter-arm)					2L_3155548_SNP	1.809e-08
FBgn0001098	3R	19761680	19768823	-	3R_21003780_SNP(trans-intra-arm),2R_14583159_SNP(trans-inter-arm)			3R_21003780_SNP,3R_20802483_INS,3R_20802492_DEL,3R_21019763_SNP,3R_25973194_SNP,3R_20893301_SNP,3R_25977249_SNP,3R_21110203_SNP,3R_25970867_SNP,3R_14333055_SNP,3R_14333056_SNP,3R_21097326_SNP,3R_14615874_SNP,3R_21100543_SNP,3R_21392543_SNP,3R_25574902_SNP,3R_14472854_SNP,3R_21105751_SNP,3R_25519595_SNP,3R_25972327_SNP,3R_20616779_SNP,3R_21103432_SNP,3R_21072504_SNP,3R_14451618_SNP,3R_21053470_SNP…	1.878e-10,5.498e-10,7.166e-10,1.674e-09,1.832e-09,3.219e-09,4.089e-09,4.459e-09,4.683e-09,5.654e-09,5.654e-09,7.262e-09,1.309e-08,1.367e-08,1.389e-08,1.955e-08,1.968e-08,2.288e-08,2.796e-08,2.854e-08,3.053e-08,3.382e-08,3.529e-08,4.423e-08,4.783e-08,5.467e-08,5.861e-08,6.087e-08,6.157e-08,6.394e-08,7.49e-08,9.342e-08,1.014e-07,1.016e-07,1.148e-07,1.207e-07,1.225e-07,1.248e-07,1.307e-07,1.307e-07,…	2R_14583159_SNP	8.846e-08
FBgn0001120	3L	14795480	14796460	-	2L_16451217_SNP(trans-inter-arm)					2L_16451217_SNP	9.172e-11
FBgn0001137	2L	8431086	8433598	-	2L_8430755_SNP(cis)	2L_8430755_SNP	1.053e-08
FBgn0001149	3R	8193539	8194990	-	3R_8208678_SNP(trans-intra-arm),3R_8195045_SNP(cis)	3R_8194980_SNP,3R_8194981_DEL,3R_8195045_SNP	1.263e-21,8.668e-17,1.865e-07	3R_8232862_SNP,3R_8349556_SNP,3R_8209974_SNP,3R_8283455_SNP,3R_8246176_SNP,3R_8246665_SNP,3R_8376432_SNP,3R_8347006_SNP,3R_8179980_SNP,3R_8208678_SNP,3R_8255297_SNP,3R_8277644_DEL,3R_8361127_SNP,3R_8394727_SNP,3R_8409502_SNP,3R_8374182_SNP,3R_8391205_SNP,3R_8427307_SNP,3R_8418777_SNP,3R_8455689_SNP,3R_8339960_SNP,3R_8487550_SNP,3R_8247227_SNP,3R_8427306_SNP,3R_8387086_SNP,3R_8204363_SNP,3R_818784…	1.531e-22,8.879e-22,2.397e-20,2.928e-20,2.938e-19,3.047e-19,3.367e-19,8.915e-19,4.19e-18,6.427e-18,6.971e-18,7.767e-18,1.165e-17,2.723e-17,1.499e-15,4.555e-14,1.159e-13,1.671e-13,3.978e-13,1.349e-12,1.725e-12,2.265e-12,3.931e-12,5.224e-12,5.692e-12,5.863e-12,9.166e-12,1.024e-11,2.476e-11,3.078e-11,1.35e-10,1.389e-10,2.12e-10,2.591e-10,4.925e-10,5.003e-10,5.227e-10,5.659e-10,6.131e-10,7.904e-10,9.…	3L_18831416_SNP,3L_15649033_SNP,3L_15649042_SNP,3L_15649030_SNP,3L_21586281_SNP,3L_22982173_SNP	1.415e-09,1.16e-08,1.16e-08,1.193e-08,6.999e-08,7.048e-08
FBgn0001179	3L	10624179	10627069	+	3L_10625279_SNP(trans-intra-arm)	3L_10626772_SNP,3L_10624590_SNP,3L_10626301_SNP	3.102e-09,1.283e-07,3.712e-07	3L_10625279_SNP,3L_10629872_SNP,3L_10625230_SNP,3L_10632020_SNP,3L_10629887_SNP,3L_10625297_SNP,3L_10630745_SNP,3L_10629171_SNP,3L_10632370_SNP,3L_10625335_SNP,3L_10625347_SNP,3L_10631766_SNP	1.263e-09,1.63e-08,3.207e-08,4.861e-08,5.934e-08,6.464e-08,1.31e-07,1.363e-07,1.679e-07,2.14e-07,2.471e-07,3.353e-07	3R_27218371_SNP	2.982e-07
FBgn0001208	3L	7753553	7756266	+	3L_7753075_SNP(cis)	3L_7753075_SNP,3L_7753174_SNP,3L_7755754_SNP,3L_7753354_SNP	1.76e-09,8.746e-09,2.027e-08,3.6e-08
FBgn0001217	3R	8870481	8873110	+	3R_8885578_SNP(trans-intra-arm),3R_8858392_SNP(trans-intra-arm),3R_8870573_SNP(cis),X_2393524_SNP(trans-inter-arm),3L_16965216_SNP(trans-inter-arm)	3R_8873315_SNP,3R_8873305_SNP,3R_8869789_INS,3R_8873120_SNP,3R_8870376_SNP,3R_8870643_DEL,3R_8872221_SNP,3R_8873349_SNP,3R_8871474_SNP,3R_8873142_SNP,3R_8873317_SNP,3R_8872947_SNP,3R_8870505_INS,3R_8869593_DEL,3R_8872671_SNP,3R_8873700_SNP,3R_8873750_SNP,3R_8872275_SNP,3R_8872581_SNP,3R_8870573_SNP,3R_8873211_SNP,3R_8871184_SNP,3R_8871239_INS	1.116e-28,1.113e-18,1.254e-14,4.776e-13,1.389e-12,3.12e-12,4.62e-11,1.028e-10,1.628e-10,4.556e-10,8.969e-10,5.833e-09,8.267e-09,6.675e-08,1.712e-07,2.952e-07,4.686e-07,5.985e-07,1.386e-06,3.094e-06,4.102e-06,4.444e-06,6.488e-06	3R_8885578_SNP,3R_8885417_DEL,3R_8825346_SNP,3R_8846029_SNP,3R_8864645_SNP,3R_8858392_SNP,3R_8875391_SNP,3R_8828856_SNP,3R_8901857_SNP,3R_8832425_SNP,3R_8886119_SNP,3R_8868633_SNP,3R_8874949_SNP,3R_8857146_SNP,3R_8908432_SNP,3R_8912786_SNP,3R_8840013_SNP,3R_8919464_SNP,3R_8875199_SNP,3R_8931717_SNP,3R_8921735_SNP,3R_8896788_SNP,3R_8953718_SNP,3R_8811395_SNP,3R_9032129_SNP,3R_8953640_SNP,3R_892847…	1.92e-49,1.933e-49,4.144e-48,3.075e-45,5.352e-45,6.874e-44,2.999e-39,2.505e-36,5.527e-36,1.707e-35,2.207e-34,3.652e-34,1.822e-33,2.62e-33,7.688e-33,7.881e-33,1.129e-32,1.889e-32,3.846e-32,8.126e-32,2.951e-31,4.527e-31,8.57e-31,1.089e-29,1.659e-29,2.047e-29,6.627e-29,8.644e-29,3.639e-28,4.325e-28,4.517e-28,5.405e-28,7.736e-28,1.692e-27,2.238e-27,2.935e-27,3.832e-27,4.419e-27,6.123e-27,9.228e-27,2.…	3L_8691843_SNP,2R_838419_SNP,3L_3965137_SNP,2L_2553116_SNP,2L_15734504_SNP,3L_14352590_SNP,3L_8827896_SNP,3L_8691841_SNP,3L_23080583_SNP,3L_8827857_SNP,2L_7099993_SNP,2L_20312930_SNP,2R_20607573_SNP,2L_20312913_SNP,2L_10393492_SNP,X_17228288_SNP,2R_275634_INS,2R_969100_SNP,2R_894656_SNP,3L_8436068_MNP,3L_20704174_SNP,3L_3965060_SNP,3L_16965216_SNP,2R_10404286_SNP,3L_8771246_SNP,3L_4809691_SNP,2R_…	2.1e-10,1.853e-08,6.394e-08,9.528e-08,2.504e-07,2.732e-07,2.837e-07,2.989e-07,5.502e-07,5.794e-07,1.393e-06,1.425e-06,1.575e-06,1.597e-06,1.651e-06,1.75e-06,2.043e-06,2.151e-06,2.203e-06,2.57e-06,2.588e-06,2.649e-06,2.668e-06,2.996e-06,4.201e-06,4.61e-06,5.151e-06,5.255e-06,5.356e-06,6.348e-06,6.576e-06,6.745e-06,7.064e-06,7.408e-06,7.938e-06,8.049e-06,8.05e-06
FBgn0001224	3L	9374982	9375865	+	3L_9375934_SNP(cis)	3L_9375934_SNP,3L_9375940_SNP,3L_9376041_SNP,3L_9375672_SNP,3L_9375919_SNP,3L_9376172_SNP,3L_9375944_SNP,3L_9376807_DEL,3L_9376122_SNP,3L_9374963_SNP,3L_9376440_SNP,3L_9375040_SNP,3L_9376347_SNP,3L_9376376_SNP,3L_9376346_SNP,3L_9376363_SNP,3L_9376381_SNP,3L_9376392_SNP,3L_9376393_SNP,3L_9376397_INS,3L_9376420_MNP,3L_9376429_SNP,3L_9376430_SNP,3L_9376433_SNP,3L_9376402_SNP,3L_9376352_SNP,3L_937644…	2.128e-17,3.221e-17,1.771e-14,1.568e-13,6.056e-12,1.275e-10,9.816e-10,2.218e-09,1.77e-08,4.395e-08,6.365e-08,6.468e-08,6.469e-08,7.475e-08,7.875e-08,7.875e-08,8.197e-08,8.197e-08,8.197e-08,8.197e-08,8.197e-08,8.319e-08,8.319e-08,8.319e-08,8.738e-08,8.781e-08,8.807e-08,9.06e-08,9.101e-08,9.183e-08,9.183e-08,9.523e-08,1.014e-07,1.017e-07,1.043e-07,1.064e-07,1.071e-07,1.127e-07,1.213e-07,1.238e-07,1…
FBgn0001285	2R	4578953	4580349	+	2R_4578676_DEL(cis)	2R_4578676_DEL	2.13e-34	2R_4577637_DEL,2R_4577620_SNP,2R_4576334_SNP,2R_4574286_SNP,2R_4566917_SNP,2R_4573957_DEL,2R_6868004_SNP,2R_4566336_SNP,2R_4584696_SNP,2R_4584720_SNP,2R_4570708_SNP,2R_4575440_SNP,2R_4567989_SNP,2R_4577262_SNP,2R_4570178_SNP,2R_4577531_SNP,2R_4576246_SNP	1.105e-26,6.233e-25,4.214e-17,1.977e-16,6.465e-14,3.784e-13,7.471e-13,1.383e-12,1.578e-12,2.383e-12,5.346e-12,1.19e-11,1.611e-11,6.511e-11,8.302e-11,1.034e-10,1.697e-10
FBgn0001332	2R	10368692	10384817	+	2R_10383958_SNP(cis)	2R_10383958_SNP,2R_10383852_SNP	1.573e-12,3.907e-09
FBgn0001404	X	2482536	2493144	+	X_2483245_SNP(cis)	X_2483245_SNP	3.077e-11
FBgn0001978	2L	15113480	15118069	+	2L_15114689_SNP(trans-intra-arm),2L_15115080_SNP(trans-intra-arm)	2L_15114078_SNP,2L_15114072_SNP,2L_15114292_SNP,2L_15113352_SNP,2L_15113348_SNP,2L_15117464_SNP,2L_15118310_SNP,2L_15118199_SNP,2L_15117087_SNP,2L_15117525_SNP,2L_15114108_SNP,2L_15118926_SNP,2L_15117511_SNP,2L_15118852_SNP	5.877e-16,1.055e-15,3.95e-15,6.796e-12,3.905e-11,9.755e-11,2.428e-10,3.339e-10,3.731e-10,9.135e-10,1.714e-09,2.418e-09,1.847e-08,7.982e-07	2L_15114689_SNP,2L_15115433_SNP,2L_15114752_SNP,2L_15115640_SNP,2L_15114986_SNP,2L_15115080_SNP,2L_15114705_SNP,2L_15115409_SNP,2L_15103148_SNP,2L_15104946_SNP,2L_15115187_SNP,2L_15116756_SNP,2L_15102801_SNP,2L_15104500_SNP,2L_15122889_SNP,2L_15104811_SNP,2L_15123090_SNP,2L_15108860_SNP,2L_15102804_SNP,2L_15102556_INS,2L_15109980_SNP,2L_15104719_SNP,2L_15110147_SNP,2L_15084453_SNP,2L_15121994_SNP…	1.852e-20,1.111e-17,6.069e-17,2.493e-16,5.131e-16,8.612e-14,2.629e-13,2.262e-12,2.437e-12,3.963e-12,4.934e-12,8.647e-10,7.171e-09,3.114e-08,3.497e-08,4.901e-08,6.098e-08,9.319e-08,1.549e-07,1.635e-07,1.647e-07,1.767e-07,2.44e-07,2.769e-07,3.524e-07,3.819e-07,3.855e-07,4.581e-07,4.698e-07,4.883e-07,5.103e-07,5.317e-07,5.885e-07,6.586e-07,8.32e-07,8.946e-07,9.153e-07,9.308e-07,9.454e-07,1.005e-06,1…	2R_6913693_SNP	8.945e-08
FBgn0002021	2L	19049843	19051612	-	2L_19051017_SNP(cis)	2L_19051014_SNP,2L_19050891_SNP,2L_19051017_SNP,2L_19051054_SNP,2L_19050897_SNP,2L_19049186_SNP,2L_19049168_SNP	2.616e-10,2.99e-10,8.94e-10,2.428e-09,4.363e-09,1.965e-08,2.248e-08
FBgn0002174	2R	19594436	19596549	+	2R_19597906_SNP(trans-intra-arm)	2R_19594514_SNP,2R_19593993_SNP,2R_19594565_SNP,2R_19596387_SNP,2R_19597051_SNP,2R_19596991_SNP,2R_19596113_SNP,2R_19595920_SNP	3.925e-25,4.37e-23,1.727e-21,5.686e-20,7.531e-20,1.549e-19,4.78e-15,9.231e-13	2R_19597906_SNP,2R_19600121_SNP,2R_19598037_SNP,2R_19597930_SNP,2R_19598038_SNP,2R_19598040_SNP,2R_19598015_DEL,2R_19598021_SNP,2R_19598028_SNP,2R_19598029_SNP,2R_19597650_SNP,2R_19597661_SNP,2R_19593251_SNP,2R_19599336_SNP,2R_19599294_SNP	2.485e-38,8.906e-30,3.514e-17,5.06e-17,8.598e-16,8.598e-16,1.101e-15,1.101e-15,1.101e-15,1.101e-15,1.349e-15,2.589e-14,3.856e-11,7.079e-11,2.841e-10
FBgn0002441	3R	23092048	23098995	-	3R_23094933_SNP(trans-intra-arm)			3R_23094933_SNP,3R_23095409_SNP,3R_23095541_SNP,3R_23095467_SNP,3R_23095574_SNP,3R_23095484_SNP,3R_23095281_SNP	1.404e-10,1.921e-10,3.065e-10,9.567e-10,1.743e-09,2.928e-09,8.027e-08
FBgn0002563	2L	898500	901316	+	2L_902483_SNP(trans-intra-arm)			2L_902483_SNP,2L_902875_SNP	1.029e-09,1.971e-09
FBgn0002564	3L	66430	68995	+	2L_2833210_SNP(trans-inter-arm)					2L_2833210_SNP	1.832e-10
FBgn0002719	3R	8538825	8548164	-	3R_8541120_SNP(trans-intra-arm)	3R_8548541_SNP,3R_8548507_SNP	3.354e-07,4.445e-07	3R_8541120_SNP,3R_8545951_SNP,3R_8541099_SNP,3R_8537714_SNP,3R_8529951_SNP,3R_8541129_SNP,3R_8529557_SNP,3R_8544125_SNP,3R_8542084_SNP,3R_8543210_SNP,3R_8551822_SNP,3R_8542762_SNP,3R_8529089_SNP	1.053e-10,5.105e-10,2.041e-09,2.661e-09,1.328e-08,2.055e-08,2.424e-08,3.159e-08,3.931e-08,7.166e-08,1.74e-07,2.125e-07,3.129e-07
FBgn0002736	2R	17016082	17017242	+	2R_17016688_SNP(cis)	2R_17016688_SNP,2R_17016691_SNP	1.303e-09,2.467e-09
FBgn0002774	2R	1862362	1868283	-	2R_1862646_SNP(cis)	2R_1862646_SNP	1.043e-11	2R_1872637_SNP,2R_1853658_SNP,2R_1872642_SNP,2R_1866417_SNP	1.659e-11,8.246e-11,8.64e-11,6.358e-09
FBgn0002939	2L	18081628	18083608	+	2L_18081484_SNP(cis),2L_18084105_SNP(cis),2L_20482078_DEL(trans-intra-arm)	2L_18081484_SNP,2L_18084105_SNP,2L_18080937_SNP,2L_18081027_SNP,2L_18083961_SNP,2L_18081547_SNP,2L_18083953_SNP	3.994e-13,2.862e-11,7.554e-10,2.277e-09,2.686e-08,3.335e-08,9.92e-08	2L_18088398_SNP,2L_18091416_SNP,2L_18091419_DEL,2L_18091435_SNP,2L_18091400_SNP,2L_18069773_INS,2L_18115700_SNP,2L_18070217_SNP,2L_18088361_SNP,2L_18088346_SNP,2L_18091368_SNP,2L_18064011_SNP,2L_18091436_SNP,2L_18084840_SNP,2L_18084839_SNP,2L_18080392_SNP,2L_18143978_SNP,2L_18149654_SNP,2L_18092359_SNP,2L_18149661_SNP,2L_18148981_SNP,2L_18143904_SNP,2L_18146290_SNP,2L_18107420_SNP,2L_18143911_SNP…	1.598e-12,2.327e-12,8.261e-12,1.088e-11,1.249e-11,1.904e-11,6.046e-11,1.622e-10,5.205e-10,8.525e-10,9.148e-10,1.228e-09,1.325e-09,1.516e-09,2.275e-09,2.29e-09,2.816e-09,3.154e-09,4.341e-09,4.834e-09,5.781e-09,8.391e-09,8.393e-09,1.112e-08,1.195e-08,1.294e-08,1.567e-08,1.731e-08,1.863e-08,2.006e-08,2.206e-08,2.218e-08,2.492e-08,2.703e-08,2.933e-08,2.961e-08,3.165e-08,3.452e-08,3.562e-08,3.862e-08,…
FBgn0002962	3R	14982960	14985924	+	3L_6650287_INS(trans-inter-arm)					3L_6650287_INS	1.426e-08
FBgn0003082	2R	3712794	3714824	+	2R_3696940_SNP(trans-intra-arm),2R_3638612_SNP(trans-intra-arm)	2R_3712139_DEL	2.051e-13	2R_3696940_SNP,2R_3694568_SNP,2R_3728875_INS,2R_3728871_INS,2R_3638612_SNP	1.831e-18,9.966e-14,6.927e-13,3.159e-11,3.267e-11
FBgn0003090	2R	3038208	3110883	+	2R_2441603_SNP(trans-intra-arm)			2R_2441603_SNP	1.716e-08
FBgn0003134	3R	20343992	20348053	+	2R_10955648_SNP(trans-inter-arm)					2R_10955648_SNP	3.428e-09
FBgn0003139	X	6265098	6266948	-	X_6265543_SNP(cis)	X_6265543_SNP	1.869e-09
FBgn0003206	3L	4139076	4141398	+	3L_2788359_SNP(trans-intra-arm),3L_2490409_SNP(trans-intra-arm)			3L_2788359_SNP,3L_2791995_SNP,3L_2490409_SNP,3L_2793343_SNP	4.962e-12,2.444e-11,7.079e-11,8.844e-11
FBgn0003227	3R	11648741	11658354	-	3R_11658347_SNP(cis)	3R_11658347_SNP,3R_11658307_SNP,3R_11657582_SNP,3R_11659045_SNP,3R_11659034_INS,3R_11647927_SNP	1.674e-20,5.861e-20,4.77e-10,1.493e-09,1.314e-07,4.48e-07	3R_11652851_SNP,3R_11655074_SNP,3R_11660297_SNP,3R_11655083_SNP,3R_11654128_SNP,3R_11653380_SNP,3R_11652578_SNP,3R_11656959_SNP,3R_11654776_SNP,3R_11652848_SNP,3R_11655017_SNP,3R_11654758_SNP,3R_11655032_SNP,3R_11652674_SNP,3R_11654605_SNP	1.71e-10,5.561e-10,5.659e-10,1.202e-09,1.612e-09,4.075e-09,9.293e-09,1.268e-08,1.534e-08,2.996e-08,3.591e-08,7.954e-08,8.751e-08,2.172e-07,2.784e-07	2R_17597817_SNP	1.384e-07
FBgn0003285	X	2844432	2867867	-	X_2975313_SNP(trans-intra-arm),3R_24181874_SNP(trans-inter-arm),3L_8207883_SNP(trans-inter-arm)			X_2975383_SNP,X_2975371_SNP,X_2975359_SNP,X_2975384_SNP,X_2975388_SNP,X_2975313_SNP,X_2975038_INS,X_2975365_INS,X_2975090_SNP,X_2975118_SNP,X_2975033_SNP,X_2975045_SNP,X_2975168_SNP,X_2969694_SNP,X_2975167_SNP,X_2975095_SNP,X_2975122_SNP,X_2975172_SNP,X_2975245_SNP,X_2969709_SNP,X_2969432_SNP,X_2975012_SNP,X_2975036_SNP,X_2976211_SNP,X_2976077_SNP,X_2975005_SNP,X_2976034_SNP,X_2976213_SNP,X_29760…	3.725e-12,6.981e-12,1.693e-11,2.07e-11,2.124e-11,2.683e-11,6.151e-11,6.962e-11,1.384e-10,1.636e-10,1.688e-10,1.831e-10,1.907e-10,2.251e-10,2.728e-10,2.816e-10,2.829e-10,2.94e-10,3.572e-10,3.575e-10,3.602e-10,4.588e-10,6.005e-10,9.367e-10,1.113e-09,1.346e-09,1.49e-09,2.726e-09,3.173e-09,3.604e-09,3.992e-09,9.879e-09,1.87e-08,2.41e-08,4.705e-07,1.3e-06	3L_8207883_SNP,3R_24181892_SNP,3R_24181874_SNP,3L_11277998_SNP	1.744e-07,4.291e-07,8.11e-07,1.094e-06
FBgn0003312	3R	7702957	7705476	+	3L_1386571_SNP(trans-inter-arm)					3L_1386571_SNP	2.347e-08
FBgn0003358	3R	25750948	25751911	-	3R_25751917_SNP(cis),3R_25751112_SNP(cis)	3R_25751917_SNP,3R_25752012_SNP,3R_25751112_SNP,3R_25752344_SNP	1.252e-13,5.276e-13,6.934e-12,9.038e-10			2L_19288915_SNP	2.135e-09
FBgn0003638	X	906812	940073	+	X_940229_SNP(cis)	X_940229_SNP	3.031e-08	X_938360_SNP	4.567e-08
FBgn0003654	X	20099035	20107456	-	3R_13602748_DEL(trans-inter-arm)					3R_13602748_DEL	3.426e-09
FBgn0003710	3L	4188499	4193788	+	3L_4185105_SNP(trans-intra-arm)	3L_4193482_SNP,3L_4188560_SNP,3L_4194032_SNP,3L_4193500_SNP,3L_4188247_SNP,3L_4188400_SNP,3L_4187515_SNP,3L_4188401_INS,3L_4188207_SNP,3L_4188396_DEL,3L_4188328_SNP,3L_4188242_SNP,3L_4193223_SNP,3L_4188632_SNP,3L_4188163_SNP	9.966e-17,5.571e-13,5.703e-13,9.427e-13,9.533e-13,7.181e-12,1.382e-11,1.449e-11,1.621e-11,1.621e-11,1.723e-11,1.767e-11,4.548e-11,1.091e-10,7.557e-10	3L_4185105_SNP,3L_4189939_SNP,3L_4185485_SNP,3L_4185599_SNP,3L_4184887_SNP,3L_4203996_SNP,3L_4186281_SNP,3L_4186655_SNP,3L_4197329_SNP,3L_4203961_SNP,3L_4187139_SNP,3L_4183359_SNP,3L_4195184_SNP,3L_4196226_SNP,3L_4184574_SNP,3L_4182526_SNP,3L_10926394_SNP,3L_4186328_SNP,3L_4195998_SNP,3L_4197135_SNP,3L_4183274_SNP,3L_4173285_SNP	1.264e-17,1.698e-16,6.49e-16,7.229e-15,7.531e-15,2.279e-12,4.578e-12,6.321e-12,6.763e-12,1.765e-11,1.924e-11,2.324e-11,4.019e-11,4.031e-11,1.048e-10,1.683e-09,1.993e-09,2.552e-09,4.072e-09,5.096e-09,5.364e-09,6.096e-09
FBgn0003888	2R	20193404	20200622	+	2L_1179679_SNP(trans-inter-arm)					2L_1179679_SNP,2L_1178859_SNP,2L_1178976_SNP,2L_1179109_SNP,2L_1179208_SNP	1.178e-08,3.78e-08,6.019e-08,6.019e-08,7.731e-08
FBgn0003890	3R	23792730	23814106	-	3R_9501324_SNP(trans-intra-arm)			3R_9501149_SNP,3R_9501324_SNP	3.965e-12,4.406e-12
FBgn0003935	2L	13244848	13244974	+	3L_1986230_SNP(trans-inter-arm)					3L_1986230_SNP,3L_1986019_SNP	8.807e-09,1.302e-08
FBgn0003997	3L	18160845	18178741	-	3L_18174495_SNP(trans-intra-arm)			3L_18174385_SNP,3L_18174211_SNP,3L_18173487_SNP,3L_18174261_SNP,3L_18174247_SNP,3L_18176853_SNP,3L_18176848_SNP,3L_18176845_SNP,3L_18174495_SNP,3L_18177185_SNP,3L_18186833_SNP	7.041e-12,8.268e-11,4.931e-10,6.11e-10,1.35e-09,4.599e-09,5.746e-09,7.82e-09,1.704e-08,4.764e-08,1.717e-07
FBgn0004055	2R	20899585	20919260	+	2R_3173010_SNP(trans-intra-arm)			2R_3173010_SNP	1.066e-08
FBgn0004108	3L	16759172	16770565	+	3L_16757961_SNP(trans-intra-arm)	3L_16759170_SNP	3.594e-12	3L_16757961_SNP	2.887e-13
FBgn0004183	3R	773655	773818	-	3R_882329_SNP(trans-intra-arm)	3R_772914_SNP	1.163e-08	3R_882329_SNP,3R_882368_INS,3R_882417_INS,3R_844288_SNP,3R_882424_SNP,3R_853551_SNP,3R_878790_SNP,3R_908874_DEL,3R_879490_SNP,3R_857957_SNP,3R_852943_SNP,3R_914094_SNP,3R_890513_SNP,3R_865889_SNP,3R_908878_INS,3R_860746_SNP,3R_750876_SNP,3R_884214_SNP,3R_882903_SNP,3R_778059_SNP,3R_778065_SNP,3R_885146_SNP,3R_850100_SNP,3R_880052_SNP,3R_887826_SNP,3R_915571_SNP,3R_866971_DEL,3R_840545_SNP,3R_8906…	1.319e-10,8.428e-10,2.071e-09,2.462e-09,3.124e-09,3.966e-09,5.275e-09,7.014e-09,7.346e-09,9.946e-09,1.299e-08,1.751e-08,1.833e-08,2.025e-08,2.117e-08,2.627e-08,3.263e-08,3.415e-08,3.531e-08,4.546e-08,4.634e-08,5.019e-08,5.207e-08,5.92e-08,6.561e-08,7.136e-08,7.295e-08,7.876e-08,9.159e-08,1.001e-07,1.019e-07,1.03e-07,1.031e-07,1.037e-07,1.049e-07,1.125e-07,1.144e-07,1.214e-07,1.305e-07,1.317e-07,1…
FBgn0004191	2L	13211925	13212116	-	2L_13211892_SNP(cis)	2L_13211892_SNP,2L_13211768_SNP,2L_13211901_SNP,2L_13212661_SNP,2L_13212151_SNP,2L_13212137_SNP,2L_13212141_SNP,2L_13212193_SNP	8.736e-17,1.167e-13,4.237e-13,5.102e-13,3.869e-12,3.848e-11,4.558e-10,2.216e-09
FBgn0004372	3L	3024129	3026521	-	3L_3026584_SNP(cis)	3L_3026584_SNP,3L_3026864_SNP,3L_3026746_SNP	6.915e-09,2.246e-08,1.059e-07
FBgn0004400	2R	13515996	13521021	-	2R_13516300_INS(cis),2R_13516023_SNP(cis)	2R_13516300_INS,2R_13516316_SNP,2R_13515833_SNP,2R_13515234_SNP,2R_13515394_SNP,2R_13515849_SNP,2R_13515317_SNP,2R_13516023_SNP,2R_13516579_SNP,2R_13515927_SNP,2R_13516522_SNP,2R_13516577_SNP	1.349e-14,2.889e-14,3.401e-14,7.804e-13,3.851e-12,4.358e-12,1.26e-11,4.889e-09,5.427e-08,7.339e-08,7.611e-08,9.739e-08	2R_13514575_SNP	3.639e-08
FBgn0004425	3L	1207371	1207981	+	3L_1210414_SNP(trans-intra-arm)			3L_1210414_SNP,3L_1210767_INS,3L_1209631_SNP,3L_1210458_SNP,3L_1210299_SNP,3L_1209645_SNP,3L_1209584_SNP,3L_1209322_SNP,3L_1210198_SNP	7.51e-24,1.626e-19,2.341e-15,6.332e-14,2.604e-13,1.378e-11,2.762e-11,9.618e-10,2.443e-09
FBgn0004426	3L	1210485	1210971	+	3L_1210430_SNP(cis),3L_1213438_SNP(trans-intra-arm)	3L_1210255_SNP,3L_1210279_SNP,3L_1210244_INS,3L_1210252_SNP,3L_1210253_INS,3L_1210259_MNP,3L_1210272_INS,3L_1210278_SNP,3L_1211188_SNP,3L_1210288_SNP,3L_1209944_SNP,3L_1210290_INS,3L_1210268_SNP,3L_1210274_SNP,3L_1210266_SNP,3L_1210285_SNP,3L_1210256_SNP,3L_1210251_SNP,3L_1210286_SNP,3L_1210296_SNP,3L_1210299_SNP,3L_1210418_INS,3L_1210422_INS,3L_1210304_SNP,3L_1210412_INS,3L_1210405_INS,3L_121041…	4.813e-24,5.826e-24,8.983e-24,8.983e-24,8.983e-24,8.983e-24,8.983e-24,1.564e-23,1.724e-23,3.316e-23,5.15e-23,7.465e-23,7.676e-23,9.304e-23,3.249e-22,3.841e-22,1.125e-21,1.223e-20,5.961e-20,3.114e-15,1.137e-14,1.059e-12,1.412e-12,2.027e-12,4.323e-12,1.395e-11,1.904e-11,3.652e-11,4.463e-11,5.523e-11,5.97e-11,7.837e-11,1.277e-10,4.119e-09,5.972e-09	3L_1213515_SNP,3L_1213512_SNP,3L_1212359_SNP,3L_1213497_SNP,3L_1213608_SNP,3L_1213438_SNP,3L_1213404_SNP,3L_1208996_INS,3L_1212745_INS,3L_1216141_SNP,3L_1215600_SNP,3L_1218317_SNP,3L_1218602_SNP,3L_1218389_SNP,3L_1218539_SNP,3L_1213630_DEL,3L_1213478_SNP,3L_1218380_SNP,3L_1219249_SNP,3L_1218401_SNP,3L_1218596_SNP,3L_1218392_SNP,3L_1216620_SNP,3L_1218515_SNP,3L_1216622_DEL,3L_1218488_SNP,3L_121663…	6.37e-24,1.439e-23,2.86e-23,1.047e-21,3.732e-21,1.031e-20,1.077e-20,2.65e-20,1.312e-19,4.268e-19,1.918e-18,2.826e-17,4.787e-17,7.33e-17,1.232e-16,1.435e-16,4.657e-16,4.702e-16,5.247e-16,9.939e-16,1.185e-15,1.881e-15,4.111e-15,5.492e-15,8.842e-15,1.564e-14,2.017e-14,5.159e-14,1.386e-13,1.758e-13,2.157e-13,2.336e-13,4.396e-13,5.712e-13,6.825e-13,7.936e-13,8.542e-13,9.705e-13,1.02e-12,2.034e-12,8.01…	3R_25488863_SNP,3R_18440850_SNP,2R_5567995_SNP,2R_5018122_SNP	2.438e-08,7.972e-08,8.24e-08,3.622e-07
FBgn0004427	3L	1210717	1211196	-	3L_1210414_SNP(cis),3L_1214092_SNP(trans-intra-arm)	3L_1210414_SNP,3L_1210299_SNP,3L_1210458_SNP,3L_1210767_INS,3L_1210198_SNP,3L_1211535_SNP	5.345e-20,5.447e-18,3.922e-16,5.159e-14,1.185e-07,5.105e-07	3L_1214130_SNP,3L_1209631_SNP,3L_1214092_SNP,3L_1213515_SNP,3L_1213512_SNP,3L_1218539_SNP,3L_1213608_SNP,3L_1218515_SNP,3L_1213497_SNP,3L_1213438_SNP,3L_1218488_SNP,3L_1218602_SNP,3L_1209584_SNP,3L_1218596_SNP,3L_1213630_DEL,3L_1218317_SNP,3L_1212985_SNP,3L_1218380_SNP,3L_1209645_SNP,3L_1214588_SNP,3L_1218389_SNP	2.128e-14,3.682e-14,4.052e-14,4.822e-12,8.205e-12,2.112e-11,4.653e-11,2.22e-10,1.058e-09,1.164e-09,1.235e-09,2.143e-09,2.857e-09,9.789e-09,1.431e-08,2.475e-08,3.555e-08,1.409e-07,1.434e-07,1.545e-07,1.546e-07	2L_1516451_SNP,2L_1516512_SNP	9.311e-08,3.221e-07
FBgn0004428	3L	1212827	1213406	+	3L_1216099_SNP(trans-intra-arm),3L_1209631_SNP(trans-intra-arm),3L_1213732_SNP(cis),3L_1216095_SNP(trans-intra-arm)	3L_1214246_SNP,3L_1213708_SNP,3L_1212197_SNP,3L_1211942_SNP,3L_1214182_SNP,3L_1213732_SNP,3L_1212499_SNP,3L_1212100_SNP,3L_1212485_SNP,3L_1214163_SNP,3L_1214167_SNP,3L_1212384_SNP	1.138e-17,1.672e-12,4.911e-12,5.528e-12,2.74e-11,1.469e-09,2.019e-09,4.253e-09,5.1e-09,6.261e-09,8.591e-08,3.222e-06	3L_1216099_SNP,3L_1215986_SNP,3L_1208201_SNP,3L_1216095_SNP,3L_1215931_SNP,3L_1215833_DEL,3L_1208722_SNP,3L_1215831_SNP,3L_1207454_SNP,3L_1209706_SNP,3L_1215819_MNP,3L_1215824_SNP,3L_1215826_DEL,3L_1215842_DEL,3L_1209768_SNP,3L_1215790_SNP,3L_1200884_SNP,3L_1200893_SNP,3L_1211142_MNP,3L_1209805_SNP,3L_1204180_SNP,3L_1200875_SNP,3L_1202865_SNP,3L_1218180_SNP,3L_1209631_SNP,3L_1217325_SNP,3L_122984…	2.597e-18,2.891e-17,6.971e-17,2.977e-16,5.011e-16,5.22e-16,9.441e-16,2.72e-15,3.509e-15,5.242e-15,9.322e-15,9.322e-15,9.322e-15,2.818e-14,7.775e-14,9.096e-14,2.235e-13,3.19e-13,3.509e-13,5.989e-13,1.117e-12,1.24e-12,1.833e-12,2.269e-12,1.043e-11,1.356e-11,1.555e-11,1.635e-11,9.153e-11,1.35e-10,1.526e-10,1.553e-10,1.727e-10,5.206e-10,5.505e-10,1.123e-09,1.473e-09,2.784e-09,3.043e-09,3.253e-09,4.44…	2L_18932514_SNP,2R_16946332_SNP,2R_11002640_SNP,2R_16946723_SNP	8.517e-07,2.405e-06,3.537e-06,3.922e-06
FBgn0004429	3L	1218082	1218696	-	3L_1218766_SNP(cis),3L_1209116_SNP(trans-intra-arm)	3L_1218766_SNP,3L_1218934_SNP,3L_1219348_SNP,3L_1218365_SNP	4.831e-43,1.307e-10,4.354e-09,5.64e-09	3L_1228945_SNP,3L_1247461_SNP,3L_1206448_SNP,3L_1250464_SNP,3L_1242377_SNP,3L_1205260_SNP,3L_1242748_SNP,3L_1252463_SNP,3L_1208045_INS,3L_1208054_DEL,3L_1255074_SNP,3L_1208007_INS,3L_1209116_SNP,3L_1208006_SNP,3L_1208076_SNP,3L_1205726_SNP,3L_1208010_INS,3L_1205268_SNP,3L_1253389_SNP,3L_1205262_SNP,3L_1208323_SNP,3L_1201649_SNP,3L_1253638_SNP,3L_1253374_SNP,3L_1195575_SNP,3L_1251194_SNP,3L_121210…	3.482e-33,3.626e-30,6.994e-27,8.777e-26,3.629e-23,8.192e-22,8.574e-21,9.825e-21,2.499e-20,2.499e-20,2.72e-20,3.463e-20,3.822e-20,6.656e-20,1.549e-19,2.273e-19,3.065e-19,4.242e-19,1.47e-18,1.973e-18,3.048e-18,4.555e-18,7.566e-18,1.564e-17,1.773e-17,1.01e-16,1.748e-16,6.593e-16,6.667e-16,2.141e-15,3.517e-15,7.003e-15,1.832e-14,2.694e-14,2.8e-14,3.555e-14,3.808e-14,4.399e-14,5.028e-14,7.032e-14,1.08…	2L_13464604_INS,2L_6689614_SNP,X_2178460_SNP	5.619e-10,9.792e-09,1.43e-08
FBgn0004431	3L	1194739	1195302	-	3L_1194426_SNP(cis),3L_1189303_SNP(trans-intra-arm)	3L_1194426_SNP,3L_1195324_SNP,3L_1195343_SNP,3L_1195673_SNP,3L_1195714_SNP,3L_1194311_SNP,3L_1195335_INS,3L_1195331_SNP,3L_1194599_SNP,3L_1196021_SNP,3L_1195284_SNP,3L_1194166_SNP,3L_1194619_SNP,3L_1195026_SNP,3L_1195939_SNP,3L_1195957_SNP,3L_1194951_SNP,3L_1195912_SNP,3L_1195908_SNP	3.189e-22,3.764e-22,2.44e-20,7.734e-16,3.258e-15,4.611e-14,5.153e-12,6.977e-12,2.869e-11,2.429e-10,1.959e-09,2.45e-09,3.927e-09,5.37e-09,1.014e-08,1.443e-07,2.232e-07,8.721e-07,1.213e-06	3L_1188736_SNP,3L_1198257_SNP,3L_1188530_SNP,3L_1198533_SNP,3L_1205266_SNP,3L_1190368_SNP,3L_1205345_SNP,3L_1190606_SNP,3L_1188853_SNP,3L_1205336_SNP,3L_1188790_DEL,3L_1189858_SNP,3L_1188781_DEL,3L_1200496_DEL,3L_1204628_SNP,3L_1189336_SNP,3L_1190382_SNP,3L_1187532_SNP,3L_1188844_SNP,3L_1205043_SNP,3L_1188213_SNP,3L_1191376_SNP,3L_1188803_SNP,3L_1188823_SNP,3L_1204651_SNP,3L_1200559_SNP,3L_118373…	1.938e-18,6.107e-17,1.506e-16,3.814e-14,8.747e-14,1.584e-13,1.647e-13,3.21e-13,4.089e-13,7.129e-13,8.223e-13,9.394e-13,1.231e-12,2.049e-12,3.211e-12,7.975e-12,7.975e-12,1.098e-11,1.461e-11,2.107e-11,2.638e-11,2.705e-11,3.441e-11,3.548e-11,4.767e-11,6.382e-11,7.373e-11,7.459e-11,9.559e-11,1.031e-10,1.061e-10,1.158e-10,1.194e-10,1.477e-10,1.672e-10,2.326e-10,2.424e-10,3.218e-10,3.381e-10,3.72e-10,4…	X_10353921_SNP,X_10353861_DEL,X_10353846_SNP,X_10353901_DEL,X_10353908_SNP,X_10353899_SNP,X_10353922_SNP,X_10353830_DEL,X_10353840_SNP,X_12273083_SNP,X_15414857_SNP,X_10353970_SNP,3R_10348705_SNP,3R_26753359_SNP,X_10353816_SNP,X_10354915_SNP,X_12273063_SNP	1.286e-08,2.163e-08,2.49e-08,3.757e-08,4.377e-08,5.489e-08,5.962e-08,9.745e-08,1.058e-07,1.291e-07,5.315e-07,6.596e-07,6.927e-07,7.633e-07,7.82e-07,7.935e-07,9.39e-07
FBgn0004463	2R	7926546	7930128	+	2R_7926854_SNP(cis),X_13009687_SNP(trans-inter-arm)	2R_7926854_SNP,2R_7926606_DEL,2R_7926617_SNP,2R_7930131_SNP,2R_7925874_SNP,2R_7930161_SNP,2R_7930168_SNP,2R_7930227_SNP,2R_7927430_SNP,2R_7930160_SNP,2R_7930157_SNP,2R_7930158_SNP,2R_7930173_SNP,2R_7930723_SNP,2R_7930692_SNP,2R_7930185_SNP,2R_7929464_SNP,2R_7930137_INS,2R_7925826_SNP,2R_7930211_SNP,2R_7930205_SNP,2R_7930200_DEL,2R_7929773_SNP,2R_7931109_SNP,2R_7929767_SNP	2.744e-15,3.525e-11,3.666e-11,5.566e-11,5.852e-11,8.723e-11,9.725e-11,9.725e-11,4.813e-10,4.814e-10,7.052e-10,7.052e-10,8.884e-10,1.91e-09,2.211e-09,2.297e-09,4.779e-09,1.261e-08,1.279e-08,1.907e-08,1.958e-08,4.272e-08,9.805e-08,2.694e-07,4.001e-07	2R_7924654_SNP,2R_7923710_SNP,2R_7922527_SNP,2R_7922575_SNP,2R_7915297_SNP,2R_7921398_SNP,2R_7921397_SNP,2R_7921399_DEL,2R_7920807_SNP,2R_7915259_SNP,2R_7917464_SNP,2R_7921226_DEL,2R_7914119_SNP,2R_7918529_SNP,2R_7931610_SNP,2R_7915114_SNP,2R_7915581_SNP,2R_7913457_SNP,2R_7931158_SNP,2R_7931159_SNP,2R_7931181_SNP,2R_7912981_DEL,2R_7932016_SNP,2R_7913594_SNP,2R_7913140_SNP,2R_7924434_SNP,2R_791366…	7.856e-13,8.14e-13,1.071e-12,1.618e-12,2.863e-12,3.897e-12,4.933e-12,5.772e-12,6.078e-12,1.121e-11,5.473e-11,8.884e-11,9.33e-11,1.73e-10,1.991e-10,2.039e-10,3.659e-10,4.169e-10,7.948e-10,8.086e-10,9.083e-10,9.302e-10,3.043e-09,3.332e-09,3.806e-09,4.342e-09,6.583e-09,9.288e-09,1.28e-08,1.537e-08,2.366e-08,2.366e-08,2.736e-08,2.736e-08,2.736e-08,2.736e-08,2.736e-08,3.042e-08,3.099e-08,4.095e-08,5.5…	X_13009687_SNP,X_18018699_INS	8.332e-08,1.257e-07
FBgn0004465	3L	16603762	16605299	-	3L_16603835_SNP(cis)	3L_16603835_SNP,3L_16605126_SNP	1.464e-09,1.985e-08	3L_16608722_SNP	6.686e-08
FBgn0004507	2L	2130813	2137296	+	2L_2135387_SNP(trans-intra-arm)			2L_2135420_SNP,2L_2135387_SNP	1.764e-09,2.346e-09
FBgn0004574	3L	4136359	4138996	-	3L_2490409_SNP(trans-intra-arm),3L_2983346_DEL(trans-intra-arm)			3L_2490409_SNP,3L_2983346_DEL	5.635e-14,2.54e-13
FBgn0004575	3R	6016411	6048164	+	2L_12695200_SNP(trans-inter-arm)					2L_12695200_SNP,2L_12693151_SNP	1.854e-08,4.661e-08
FBgn0004587	3R	9487033	9492613	+	3R_9488106_SNP(trans-intra-arm)	3R_9486267_SNP,3R_9491790_SNP	7.458e-09,6.678e-08	3R_9488106_SNP,3R_9488100_SNP,3R_9488254_SNP,3R_9488361_SNP,3R_9485946_SNP,3R_9489298_SNP,3R_9491237_SNP,3R_9489241_SNP,3R_9482020_SNP,3R_9485311_SNP,3R_9491414_SNP	1.601e-36,6.322e-25,3.478e-20,2.541e-11,1.381e-10,3.832e-10,1.742e-09,3.528e-09,1.072e-08,1.93e-07,2.994e-07	3L_16791497_SNP	2.654e-07
FBgn0004622	3R	25776518	25795169	-	3R_27506431_SNP(trans-intra-arm)			3R_27506431_SNP	9.686e-13
FBgn0004629	3R	10394825	10395366	-	3R_10400996_SNP(trans-intra-arm),3R_23431019_SNP(trans-intra-arm),3L_9714080_SNP(trans-inter-arm)	3R_10395391_SNP,3R_10395541_SNP,3R_10395450_SNP	4.792e-12,1.133e-10,1.727e-08	3R_10401968_SNP,3R_10398703_SNP,3R_10401985_SNP,3R_10402489_INS,3R_10401166_SNP,3R_10401828_SNP,3R_10398900_SNP,3R_10400996_SNP,3R_10399243_SNP,3R_10401023_SNP,3R_10402007_SNP,3R_10401827_SNP,3R_10402322_SNP,3R_10403272_SNP,3R_10401760_DEL,3R_10373134_SNP,3R_10402337_SNP,3R_10401740_SNP,3R_10401687_SNP,3R_10382732_SNP,3R_10400912_SNP,3R_10400257_SNP,3R_10400939_SNP,3R_10401735_SNP,3R_10392848_SNP…	4.154e-13,8.203e-13,1.931e-12,1.933e-12,1.977e-12,5.157e-12,5.276e-12,6.071e-12,6.174e-12,6.81e-12,1.141e-11,1.191e-11,1.234e-11,4.508e-11,5.749e-11,1.055e-10,1.252e-10,1.94e-10,2.885e-10,3.769e-10,5.001e-10,5.218e-10,8.92e-10,1.064e-09,1.347e-09,1.663e-09,2.354e-09,2.469e-09,2.969e-09,5.999e-09,8.753e-09,1.029e-08,1.551e-08,1.697e-08,1.717e-08,2.152e-08,2.438e-08,5.293e-08,5.423e-08,5.774e-08,6.…	3L_9714080_SNP,2R_17623908_SNP,2L_21748252_SNP,3L_9714275_SNP,3L_9714309_SNP	1.458e-08,2.699e-07,3.943e-07,3.972e-07,8.307e-07
FBgn0004654	X	2039169	2042599	+	X_2045669_INS(trans-intra-arm),X_21350136_SNP(trans-intra-arm)	X_2042740_DEL,X_2039159_SNP,X_2039075_SNP,X_2043142_SNP,X_2043138_DEL,X_2038609_SNP	5.253e-09,8.759e-09,1.489e-08,2.809e-07,1.102e-06,1.261e-06	X_2050333_SNP,X_2049655_SNP,X_2055096_SNP,X_2041094_SNP,X_2045669_INS,X_2056263_SNP,X_2058893_SNP,X_2048477_SNP,X_2057564_SNP,X_2036834_SNP,X_2061419_SNP,X_2061403_SNP,X_2019362_SNP,X_2055554_SNP,X_2059234_SNP,X_2010317_SNP,X_2036988_SNP,X_2056220_SNP,X_21350136_SNP,X_2010064_SNP,X_2045526_SNP,X_2035760_SNP,X_2019427_INS,X_2056221_INS,X_2019428_DEL,X_2011403_SNP,X_2035419_SNP,X_2035824_SNP,X_2035…	8.849e-12,1.083e-11,7.785e-11,3.058e-10,3.884e-10,6.44e-10,1.136e-09,1.622e-09,3.853e-09,6.478e-09,1.298e-08,3.316e-08,4.023e-08,6.596e-08,9.862e-08,1.059e-07,1.428e-07,1.452e-07,1.505e-07,1.667e-07,1.998e-07,2.249e-07,2.292e-07,2.299e-07,2.312e-07,2.632e-07,3.167e-07,3.246e-07,3.962e-07,4.023e-07,4.89e-07,5.237e-07,5.529e-07,5.699e-07,5.717e-07,5.838e-07,6.3e-07,6.54e-07,6.77e-07,6.818e-07,7.06e…
FBgn0004666	3R	8883477	8903846	+	3R_8907740_SNP(trans-intra-arm),3L_14069154_SNP(trans-inter-arm),3R_8732173_INS(trans-intra-arm)	3R_8903852_SNP,3R_8903020_SNP,3R_8903873_INS,3R_8903134_SNP,3R_8903367_SNP	3.595e-10,2.293e-09,3.619e-09,1.435e-08,1.958e-07	3R_8907740_SNP,3R_8732173_INS,3R_8915050_SNP,3R_8923577_SNP,3R_8737963_INS,3R_8737969_SNP,3R_8737944_INS,3R_8737948_SNP,3R_8736665_SNP,3R_8738490_SNP,3R_8737333_SNP,3R_8905024_SNP,3R_8871660_SNP,3R_8737938_INS,3R_8907819_SNP,3R_8738057_SNP,3R_8738001_SNP,3R_8732190_SNP,3R_8731821_SNP,3R_8737993_SNP,3R_8738141_SNP,3R_8737748_SNP,3R_8901244_SNP,3R_8733894_SNP,3R_8737995_SNP,3R_8898643_SNP,3R_873366…	3.406e-11,4.516e-10,1.434e-09,2.756e-09,1.009e-08,2.115e-08,2.155e-08,3.028e-08,3.871e-08,4.597e-08,4.887e-08,5.312e-08,7.297e-08,8.397e-08,8.937e-08,9.061e-08,9.38e-08,1.059e-07,1.441e-07,1.941e-07,2.051e-07,2.083e-07,2.202e-07,2.672e-07,2.676e-07,2.755e-07,2.88e-07,3.278e-07,3.393e-07,3.951e-07,4.068e-07,4.235e-07,4.789e-07,5.405e-07,5.717e-07,8.057e-07,8.06e-07,8.539e-07,8.611e-07,8.745e-07,9.…	X_598414_INS,3L_14069162_SNP,3L_14069154_SNP	7.474e-08,1.305e-07,5.199e-07
FBgn0004858	2L	14390628	14409549	-	2L_9685726_SNP(trans-intra-arm),2R_13774098_SNP(trans-inter-arm)			2L_9685671_SNP,2L_9685674_SNP,2L_9685726_SNP,2L_9685703_SNP,2L_9685690_SNP	4.707e-10,9.462e-10,9.704e-10,1.003e-09,1.098e-09	2R_13774098_SNP	2.336e-09
FBgn0004915	2L	10431338	10433116	+	2L_10432979_SNP(cis)	2L_10432979_SNP	4.294e-09
FBgn0005564	3L	19559951	19577668	-	3L_19578802_SNP(trans-intra-arm),3L_4668586_SNP(trans-intra-arm)	3L_19578014_SNP	4.312e-08	3L_19578802_SNP,3L_4668586_SNP	5.498e-09,2.224e-08
FBgn0005670	X	2053178	2056213	-	X_2055053_SNP(trans-intra-arm),X_2054364_SNP(trans-intra-arm),X_2060448_SNP(trans-intra-arm)	X_2056220_SNP,X_2053575_SNP,X_2055554_SNP,X_2056221_INS,X_2056263_SNP,X_2055222_SNP,X_2055234_SNP,X_2055231_SNP,X_2055452_SNP,X_2055630_SNP,X_2056810_SNP,X_2053119_SNP,X_2056154_SNP,X_2055460_SNP,X_2056186_SNP	1.355e-24,1.809e-24,3.136e-24,4.331e-24,2.412e-23,4.668e-23,7.923e-23,3.149e-22,2.198e-08,6.805e-08,2.911e-07,1.209e-06,4.612e-06,5.785e-06,6.902e-06	X_2055053_SNP,X_2050333_SNP,X_2043142_SNP,X_2054375_SNP,X_2049655_SNP,X_2054995_SNP,X_2054992_SNP,X_2045526_SNP,X_2045525_SNP,X_2049700_SNP,X_2055096_SNP,X_2046702_SNP,X_2045199_SNP,X_2041094_SNP,X_2051603_SNP,X_2042783_INS,X_2041591_SNP,X_2054512_SNP,X_2048477_SNP,X_2054291_SNP,X_2054347_SNP,X_2054364_SNP,X_2045669_INS,X_2054561_SNP,X_2057564_SNP,X_2038609_SNP,X_2054471_SNP,X_2037297_SNP,X_20431…	1.004e-29,1.474e-29,3.759e-29,4.737e-29,8.629e-29,9.318e-29,4.032e-28,4.557e-28,4.956e-28,4.882e-27,5.27e-27,2.458e-26,5.226e-26,6.987e-26,3.344e-25,3.648e-25,5.692e-25,6.185e-25,7.242e-25,9.331e-25,1.07e-24,1.181e-24,1.767e-24,1.942e-24,2.333e-24,6e-24,6.825e-24,1.05e-23,1.83e-23,2.163e-23,2.19e-23,2.383e-23,2.995e-23,3.809e-23,4.246e-22,4.466e-22,6.694e-22,1.21e-21,3.376e-21,4.297e-21,9.834e-21…	2L_18222655_SNP,2L_18222815_SNP,2L_18222773_SNP,2L_18222783_SNP,2L_18222782_SNP,2L_18222771_SNP,2L_18202355_SNP,2L_11140051_SNP,2L_18222855_SNP,3L_6539596_SNP,2R_11955241_SNP,2L_18214668_SNP	2.488e-08,1.573e-07,2.379e-07,2.548e-07,2.747e-07,3.683e-07,6.288e-07,8.284e-07,1.117e-06,3.17e-06,3.233e-06,4.09e-06
FBgn0008651	3R	17235701	17259855	-	3R_17236334_SNP(cis)	3R_17236334_SNP,3R_17236319_SNP,3R_17236312_SNP	7.468e-11,3.308e-09,3.523e-09
FBgn0010043	3R	8204222	8204977	+	3R_8194981_DEL(trans-intra-arm),3L_4650555_SNP(trans-inter-arm)			3R_8194980_SNP,3R_8209974_SNP,3R_8232862_SNP,3R_8179980_SNP,3R_8194981_DEL,3R_8349556_SNP,3R_8283455_SNP	8.911e-10,7.211e-09,7.961e-09,9.091e-09,2.261e-08,5.111e-08,1.606e-07	3L_4650555_SNP	8.433e-08
FBgn0010051	3R	1342839	1365133	+	3R_2348448_SNP(trans-intra-arm),3R_1595649_SNP(trans-intra-arm),2R_11936558_SNP(trans-inter-arm)	3R_1342547_SNP,3R_1342041_SNP	1.986e-07,4.999e-07	3R_2348448_SNP,3R_1601583_DEL,3R_1485584_INS,3R_1657115_SNP,3R_1632644_SNP,3R_1601550_SNP,3R_2115342_SNP,3R_2526163_SNP,3R_1647220_SNP,3R_2025150_DEL,3R_1571594_SNP,3R_1563381_SNP,3R_1597290_SNP,3R_1632511_SNP,3R_1553522_SNP,3R_1649741_SNP,3R_1639477_SNP,3R_1623612_SNP,3R_1601483_SNP,3R_1692148_SNP,3R_1689885_SNP,3R_1634854_INS,3R_1650245_DEL,3R_2524306_SNP,3R_1563824_SNP,3R_1563853_SNP,3R_164783…	1.014e-12,2.98e-12,1.198e-11,1.979e-11,3.387e-11,4.514e-11,5.609e-11,5.749e-11,6.543e-11,8.206e-11,8.334e-11,8.399e-11,8.71e-11,9.588e-11,1.022e-10,1.307e-10,1.338e-10,1.931e-10,2.107e-10,2.133e-10,2.182e-10,2.397e-10,2.397e-10,2.411e-10,3.047e-10,3.047e-10,3.559e-10,3.772e-10,4.84e-10,5.168e-10,5.311e-10,6.984e-10,7.297e-10,7.404e-10,7.672e-10,8.148e-10,8.148e-10,8.148e-10,8.531e-10,8.953e-10,9.…	2R_11936558_SNP,X_10726671_SNP,2R_13131445_SNP,2R_13131419_SNP,3L_8193081_INS,2R_2777602_SNP,2R_9157160_SNP,2R_2777434_SNP,X_5808399_SNP	8.568e-08,3.411e-07,6.033e-07,6.993e-07,9.464e-07,2.059e-06,4.278e-06,4.459e-06,4.498e-06
FBgn0010220	2R	4975339	4977307	+	2R_4976191_SNP(cis)	2R_4976191_SNP,2R_4975268_SNP	1.378e-08,3.209e-08
FBgn0010222	3R	4868230	4876277	-	3R_4872279_SNP(trans-intra-arm)	3R_4876051_SNP,3R_4875497_DEL,3R_4868145_SNP,3R_4868144_SNP,3R_4868472_SNP,3R_4868315_SNP,3R_4867877_SNP	4.206e-15,1.082e-13,8.78e-12,8.956e-12,9.98e-11,3.858e-10,7.994e-10	3R_4872279_SNP,3R_4883258_SNP,3R_4882323_SNP,3R_4882864_SNP,3R_4886284_SNP,3R_4875053_SNP,3R_4870278_SNP,3R_4874909_SNP,3R_4872381_SNP,3R_4879405_SNP,3R_4869832_SNP,3R_4885793_SNP,3R_4905053_SNP,3R_4870277_SNP,3R_4858203_SNP,3R_4884421_SNP,3R_4861231_SNP,3R_4877358_SNP,3R_4860184_DEL,3R_4865238_SNP,3R_4864153_DEL,3R_4864146_SNP,3R_4862576_SNP,3R_4889569_SNP,3R_4864797_SNP,3R_4861232_SNP,3R_486075…	5.437e-20,3.287e-17,9.999e-17,1.007e-16,4.597e-16,6.859e-16,3.394e-15,6.132e-15,1.555e-14,3.481e-14,4.39e-14,1.496e-13,2.163e-13,2.704e-13,5.113e-13,6.808e-13,7.672e-13,9.488e-13,1.021e-12,3.3e-12,4.769e-12,5.257e-12,8.024e-12,8.174e-12,8.898e-12,1.047e-11,1.086e-11,1.217e-11,1.263e-11,1.768e-11,2.07e-11,2.348e-11,4.625e-11,4.63e-11,5.104e-11,7.14e-11,2.102e-10,2.558e-10,2.983e-10,3.893e-10,4.418…	3L_17768925_SNP	8.002e-07
FBgn0010238	2R	8340695	8353135	+	2R_8341423_SNP(cis),2R_8254160_SNP(trans-intra-arm)	2R_8341423_SNP,2R_8341330_SNP,2R_8341035_SNP,2R_8340548_SNP,2R_8340471_SNP,2R_8340649_SNP,2R_8340748_SNP,2R_8340440_SNP	3.204e-40,3.263e-39,6.596e-11,1.21e-10,3.493e-07,3.493e-07,4.322e-07,8.738e-07	2R_8343085_SNP,2R_8342187_SNP,2R_8342202_SNP,2R_8339434_SNP,2R_8342180_SNP,2R_8342182_SNP,2R_8339409_SNP,2R_8341698_SNP,2R_8342242_INS,2R_8346664_SNP,2R_8342273_SNP,2R_8338635_SNP,2R_8255123_SNP,2R_8342229_DEL,2R_8349002_SNP,2R_8346706_SNP,2R_8323101_SNP,2R_8336514_SNP,2R_8325915_SNP,2R_8290253_SNP,2R_8254845_SNP,2R_8332449_SNP,2R_8253250_SNP,2R_8253255_SNP,2R_8332576_SNP,2R_8337309_SNP,2R_829125…	9.738e-14,2.879e-11,5.621e-11,2.148e-10,2.482e-10,2.521e-10,3.009e-10,4.463e-10,5.963e-10,1.025e-09,1.829e-09,1.899e-09,3.387e-09,5.427e-09,7.743e-09,9.184e-09,1.212e-08,1.279e-08,1.862e-08,2.023e-08,2.443e-08,2.887e-08,5.525e-08,5.525e-08,6.049e-08,6.483e-08,7.366e-08,9.801e-08,1.087e-07,1.163e-07,1.433e-07,1.748e-07,2.34e-07,2.609e-07,2.847e-07,3.488e-07,3.866e-07,3.891e-07,3.891e-07,3.997e-07,…
FBgn0010241	2R	10134471	10140102	+	2R_10137395_SNP(trans-intra-arm)			2R_10137395_SNP,2R_10137440_SNP,2R_10131012_SNP	4.16e-15,8.486e-13,1.248e-11
FBgn0010278	2R	19693884	19696527	-	2R_19695389_SNP(trans-intra-arm),2R_19696703_DEL(cis)	2R_19696703_DEL,2R_19696949_SNP,2R_19696918_SNP	4.621e-08,6.982e-08,2.352e-07	2R_19695323_SNP,2R_19695389_SNP,2R_19694930_SNP,2R_19695281_SNP,2R_19694888_SNP,2R_19694963_SNP,2R_19691521_SNP	9.523e-11,2.171e-10,1.087e-09,1.023e-08,1.351e-08,4.657e-08,1.678e-07
FBgn0010357	2R	7233830	7234900	+	2R_7233800_SNP(cis)	2R_7233800_SNP	2.156e-16
FBgn0010358	2R	7242824	7243633	+	X_21457641_SNP(trans-inter-arm)					X_21457641_SNP	1.936e-13
FBgn0010379	3R	11924950	11931392	+	3R_18934693_SNP(trans-intra-arm),2L_11880111_SNP(trans-inter-arm)			3R_18934693_SNP	1.738e-10	2L_11880111_SNP,2R_8549178_SNP	5.28e-10,3.785e-09
FBgn0010380	X	19625037	19628614	+	X_19626243_SNP(trans-intra-arm)			X_19626243_SNP	9.922e-09
FBgn0010381	3L	3369556	3369942	+	3L_3370131_SNP(cis),X_2692695_SNP(trans-inter-arm),3R_22096886_DEL(trans-inter-arm)	3L_3370177_SNP,3L_3370131_SNP,3L_3370205_SNP,3L_3370316_SNP,3L_3370317_SNP,3L_3370227_SNP,3L_3370516_SNP,3L_3370713_SNP,3L_3370609_SNP,3L_3370107_SNP,3L_3369277_SNP,3L_3369440_SNP,3L_3369453_SNP,3L_3369038_SNP,3L_3368876_SNP,3L_3369171_SNP,3L_3369172_SNP	1.401e-10,1.48e-10,9.077e-10,2.381e-09,2.381e-09,2.543e-09,2.669e-09,7.404e-09,2.411e-08,3.742e-08,1.031e-07,1.214e-07,1.3e-07,3.383e-07,5e-07,6.999e-07,6.999e-07	3L_3365130_SNP,3L_3365493_SNP,3L_3372321_SNP,3L_3365187_SNP,3L_3370986_SNP,3L_3370957_SNP,3L_3361980_SNP	4.728e-08,1.169e-07,1.912e-07,3.24e-07,4.045e-07,4.978e-07,5.545e-07	3R_22096886_DEL,3R_22096883_SNP,X_2692695_SNP,3R_22097119_SNP	1.349e-07,1.722e-07,2.043e-07,3.753e-07
FBgn0010434	2R	15116568	15131256	+	2R_15124191_SNP(trans-intra-arm)			2R_15124191_SNP,2R_15124444_SNP,2R_15124152_SNP,2R_15124937_SNP	7.183e-29,8.994e-11,2.803e-08,3.84e-08
FBgn0010470	2R	17374672	17385434	-	2R_17384286_SNP(trans-intra-arm)			2R_17384286_SNP	2.427e-09
FBgn0010516	2R	7576074	7578368	-	2R_7578005_SNP(cis),X_904184_SNP(trans-inter-arm)	2R_7578005_SNP,2R_7578041_SNP,2R_7578474_SNP,2R_7578513_SNP	1.038e-13,5.467e-12,2.956e-08,3.33e-08	2R_7582314_SNP	1.757e-09	X_904184_SNP,X_904183_SNP	1.131e-07,1.385e-07
FBgn0010548	2R	3354384	3364667	-	2L_18547287_SNP(trans-inter-arm)					2L_18547287_SNP	2.353e-10
FBgn0010549	2R	5277670	5282786	+	2R_5277537_SNP(cis),2R_5279323_SNP(trans-intra-arm)	2R_5277537_SNP,2R_5276881_SNP	1.853e-35,9.961e-11	2R_5254849_SNP,2R_5279421_SNP,2R_5279323_SNP,2R_5313263_INS	1.727e-11,3.989e-11,1.438e-10,2.334e-10	2L_11532006_SNP,2L_11531973_SNP	7.021e-13,4.846e-12
FBgn0010551	2R	14706972	14709755	+	2R_14707777_SNP(cis)	2R_14707777_SNP,2R_14707575_SNP,2R_14707349_SNP	2.956e-25,4.848e-17,1.883e-13
FBgn0010583	2L	825969	833241	+	2L_6255045_SNP(trans-intra-arm)			2L_6255045_SNP	1.601e-12
FBgn0010621	2R	8062307	8065021	+	X_2620179_SNP(trans-inter-arm)					X_2620179_SNP	7.98e-09
FBgn0010768	3R	14989933	14996298	+	3R_14990073_SNP(cis)	3R_14990073_SNP	3.316e-12	3R_14988298_SNP,3R_14986981_SNP	3.743e-08,6.633e-08
FBgn0010786	3L	1334889	1339415	+	3L_1334950_SNP(cis),2R_18584223_SNP(trans-inter-arm)	3L_1335122_SNP,3L_1334966_SNP,3L_1334950_SNP,3L_1335593_SNP,3L_1335670_SNP,3L_1334800_SNP,3L_1334755_SNP,3L_1335331_SNP,3L_1335813_SNP,3L_1335412_INS,3L_1334406_SNP,3L_1334726_SNP,3L_1335663_SNP,3L_1335665_SNP,3L_1335307_SNP,3L_1334343_SNP,3L_1334121_SNP,3L_1334723_SNP,3L_1335711_SNP,3L_1335662_SNP,3L_1335543_SNP	1.04e-11,1.59e-11,3.189e-11,1.163e-10,1.707e-10,3.156e-10,3.653e-10,5.543e-10,6.876e-10,8.164e-10,1.03e-09,3.217e-09,3.753e-09,4.543e-09,1.065e-08,1.5e-08,2.189e-08,3.313e-08,4.033e-08,4.187e-08,8.597e-08	3L_1337203_SNP,3L_1337347_SNP,3L_1335934_SNP,3L_1333441_SNP,3L_1332727_SNP,3L_1332846_SNP,3L_1333540_SNP,3L_1337143_SNP	4.19e-11,5.657e-10,3.637e-09,1.396e-08,4.097e-08,5.192e-08,6.897e-08,1.252e-07	2R_18584223_SNP,2L_6984425_SNP	1.248e-07,1.94e-07
FBgn0010877	3R	14114588	14124601	-	3R_9298396_INS(trans-intra-arm)			3R_9298396_INS	4.165e-09
FBgn0010894	3L	5552570	5554698	-	3L_5554703_SNP(cis),3L_5553108_SNP(cis)	3L_5554703_SNP,3L_5553447_SNP,3L_5553446_SNP,3L_5555026_SNP,3L_5553975_SNP,3L_5553455_SNP,3L_5553533_SNP,3L_5555086_SNP,3L_5555254_SNP,3L_5553108_SNP,3L_5552819_SNP,3L_5552785_SNP,3L_5552727_SNP,3L_5554696_SNP,3L_5553188_SNP,3L_5554926_SNP,3L_5555665_SNP,3L_5552979_SNP,3L_5554788_SNP,3L_5555282_SNP,3L_5553403_SNP,3L_5552543_SNP,3L_5555293_SNP,3L_5555290_SNP,3L_5553189_SNP	1.996e-12,2.371e-12,4.762e-12,4.958e-12,5.209e-12,7.236e-12,1.895e-11,5.221e-11,7.115e-11,1.05e-10,4.635e-10,6.861e-10,8.861e-10,1.816e-09,1.947e-09,2.237e-09,2.621e-09,3.051e-09,4.803e-09,5.755e-08,6.619e-08,9.426e-08,4.244e-07,4.247e-07,7.81e-07	3L_5555788_SNP	9.268e-10	2L_5076545_SNP	6.662e-07
FBgn0010926	3R	13362654	13365685	-	3R_13365632_SNP(cis),2L_6251925_SNP(trans-inter-arm)	3R_13365632_SNP,3R_13366266_SNP,3R_13362644_SNP,3R_13362414_SNP,3R_13363317_SNP,3R_13362648_DEL,3R_13362630_SNP,3R_13362632_DEL,3R_13362631_SNP,3R_13362637_SNP,3R_13361789_SNP,3R_13362623_DEL,3R_13361750_SNP	5.158e-18,8.246e-12,6.154e-09,9.523e-09,1.026e-08,2.421e-08,4.712e-08,6.302e-08,7.225e-08,7.4e-08,9.656e-08,1.223e-07,1.833e-07	3R_13367109_SNP,3R_13376015_DEL,3R_13360868_SNP,3R_13372362_SNP,3R_13364672_SNP,3R_13351921_SNP,3R_13387210_SNP,3R_13378097_SNP,3R_13392509_SNP,3R_13361604_SNP,3R_13364544_SNP,3R_3934538_SNP,3R_13364442_SNP,3R_13394852_SNP,3R_13380650_SNP,3R_13364292_SNP,3R_13364463_SNP,3R_13392303_DEL,3R_13355383_SNP	9.147e-17,1.286e-11,2.789e-11,2.964e-11,3.213e-11,1.033e-09,1.854e-08,2.167e-08,2.668e-08,4.133e-08,8.155e-08,1.118e-07,2.058e-07,2.088e-07,3.059e-07,3.584e-07,3.757e-07,4.029e-07,5.028e-07	2L_6251925_SNP,3L_8659028_SNP	1.546e-07,1.822e-07
FBgn0011230	2L	8054322	8071624	-	X_10068076_SNP(trans-inter-arm)					X_10068076_SNP	1.424e-08
FBgn0011297	2R	19592962	19597315	-	2R_19597906_SNP(cis)	2R_19597906_SNP	4.206e-13	2R_19600121_SNP,2R_19594565_SNP,2R_19594514_SNP,2R_19600132_SNP,2R_19600078_SNP,2R_19599336_SNP,2R_19600133_SNP	7.294e-13,1.37e-10,3.961e-10,7.533e-09,8.979e-09,1.163e-08,3.263e-08
FBgn0011481	3R	14018216	14025317	-	3R_14021360_SNP(trans-intra-arm),3R_14021261_SNP(trans-intra-arm)	3R_14026270_SNP	1.666e-08	3R_14021297_SNP,3R_14021261_SNP,3R_14023817_SNP,3R_14021360_SNP,3R_14021405_SNP,3R_14023158_SNP,3R_14023160_SNP,3R_14023429_SNP,3R_14021900_SNP,3R_14023430_SNP,3R_14023937_SNP,3R_14023577_SNP,3R_14023491_SNP,3R_14023481_SNP,3R_14023768_SNP,3R_14023568_SNP,3R_14023201_SNP,3R_14023202_SNP,3R_14033296_SNP,3R_14021756_SNP,3R_14021492_SNP,3R_14024067_DEL,3R_14021873_SNP,3R_14033233_SNP	6.248e-11,2.434e-10,8.321e-10,1.046e-09,1.363e-09,1.549e-09,1.578e-09,1.578e-09,1.716e-09,1.823e-09,4.307e-09,4.669e-09,9.158e-09,1.181e-08,1.742e-08,2.162e-08,1.33e-07,1.396e-07,1.443e-07,1.598e-07,1.665e-07,4.024e-07,4.303e-07,5.497e-07
FBgn0011603	2L	4468000	4477022	-	3L_8700871_SNP(trans-inter-arm)					3L_8700871_SNP	3.728e-08
FBgn0011604	2R	8524176	8528133	+	2R_8525607_SNP(trans-intra-arm)	2R_8524756_SNP,2R_8528000_INS,2R_8524160_SNP,2R_8527451_SNP,2R_8527522_SNP,2R_8527164_SNP,2R_8527523_SNP,2R_8527327_SNP	1.336e-13,8.728e-12,3.113e-11,3.342e-11,1.096e-09,1.125e-08,1.237e-08,2.65e-08	2R_8525664_SNP,2R_8525607_SNP,2R_8525685_SNP,2R_8525661_SNP,2R_8525514_SNP,2R_8525631_SNP,2R_8522230_SNP,2R_8526978_SNP,2R_8521593_SNP,2R_8517040_SNP,2R_8517008_DEL,2R_8526741_SNP,2R_8516846_SNP,2R_8522232_SNP,2R_8522825_SNP,2R_8526090_SNP,2R_8526108_SNP,2R_8517193_SNP,2R_8526204_SNP,2R_8518255_SNP,2R_8525901_SNP,2R_8529751_SNP,2R_8529817_SNP,2R_8529637_SNP,2R_8514950_SNP,2R_8514212_SNP,2R_852142…	2e-21,3.789e-20,1.127e-19,1.838e-19,5.725e-16,2.469e-15,1.97e-14,2.116e-14,4.587e-14,5.755e-14,1.54e-13,1.62e-13,2.584e-13,9.134e-13,7.181e-12,1.579e-11,2.377e-11,3.166e-11,3.393e-11,4.048e-11,5.858e-11,7.985e-11,9.933e-11,2.071e-10,9.871e-10,1.151e-09,1.347e-09,2.63e-09,6.969e-09,2.153e-08,2.203e-08,3.822e-08,7.383e-08,8.068e-08,1.032e-07,1.638e-07,1.669e-07,2.098e-07,3.178e-07
FBgn0011606	X	2493191	2498085	-	3R_12897467_SNP(trans-inter-arm)					3R_12897467_SNP	8.229e-09
FBgn0011648	2L	3146056	3159643	-	2L_16339491_SNP(trans-intra-arm)			2L_16339544_SNP,2L_16339491_SNP,2L_16339757_SNP	1.176e-08,1.19e-08,1.486e-08
FBgn0011722	2L	6415179	6423310	-	2L_6422740_SNP(cis)	2L_6422740_SNP,2L_6422696_SNP	2.59e-09,1.266e-08
FBgn0011739	3R	26615347	26632341	-	3R_26615934_SNP(cis),2R_12361205_DEL(trans-inter-arm),3R_26615924_SNP(cis)	3R_26615934_SNP,3R_26615924_SNP	1.964e-08,2.156e-08			2R_12361205_DEL	7.904e-08
FBgn0011768	3R	6696628	6698103	-	3R_6696516_SNP(cis)	3R_6696515_SNP,3R_6696516_SNP,3R_6696364_SNP	1.024e-10,5.075e-10,6.461e-10	3R_6692491_SNP,3R_6692454_SNP	2.912e-10,4.133e-09
FBgn0011826	X	16448660	16454049	-	X_16453114_SNP(cis)	X_16453114_SNP	6.543e-10
FBgn0013278	3R	8331515	8333861	+	3R_8327771_INS(trans-intra-arm)			3R_8326949_SNP,3R_8327874_SNP,3R_8327771_INS,3R_8327756_SNP,3R_8327769_INS	7.104e-11,8.089e-11,7.396e-10,1.477e-09,6.349e-09
FBgn0013305	2R	8764599	8767735	-	2R_8764765_SNP(cis)	2R_8764765_SNP	1.317e-08
FBgn0013308	2R	3894751	3896567	+	2R_3894214_SNP(cis),2R_3818125_INS(trans-intra-arm)	2R_3894214_SNP,2R_3894240_SNP,2R_3894597_SNP,2R_3894693_SNP,2R_3894430_SNP,2R_3896554_SNP,2R_3894658_SNP,2R_3894690_SNP	4.144e-27,1.082e-25,9.385e-15,6.883e-11,2.871e-10,1.84e-08,2.58e-08,4.641e-08	2R_3890985_SNP,2R_3890978_SNP,2R_3818125_INS,2R_3891144_SNP,2R_3891182_SNP,2R_3890976_SNP,2R_3884505_SNP,2R_3891156_SNP,2R_3884506_SNP,2R_3859851_SNP,2R_3837036_SNP,2R_3907251_SNP,2R_3891029_SNP,2R_3883724_SNP,2R_3881986_SNP,2R_3907216_SNP,2R_3891116_SNP	2.168e-11,9.259e-11,1.114e-10,1.329e-10,1.772e-10,6.973e-10,7.828e-10,1.293e-09,2.338e-09,1.139e-08,1.371e-08,1.414e-08,1.787e-08,2.264e-08,2.842e-08,3.859e-08,5.928e-08
FBgn0013323	2L	575711	576896	-	2L_577045_INS(cis),3L_12357801_SNP(trans-inter-arm)	2L_577051_DEL,2L_577066_MNP,2L_577045_INS,2L_577070_SNP,2L_577078_SNP,2L_577047_SNP,2L_577050_SNP,2L_577076_SNP,2L_577080_DEL,2L_577000_SNP,2L_577285_SNP,2L_577673_SNP,2L_577256_SNP,2L_576772_SNP,2L_577184_SNP	1.11e-21,1.11e-21,1.631e-21,1.778e-21,2.614e-21,3.348e-21,5.496e-21,1.654e-20,7.418e-20,1.528e-15,1.162e-11,5.18e-11,8.239e-11,1.366e-10,1.233e-09			3L_12357801_SNP	4.659e-09
FBgn0013531	2L	8071812	8072848	-	2R_17622275_SNP(trans-inter-arm),3R_11652036_SNP(trans-inter-arm)					2R_17622275_SNP,3R_11652036_SNP	2.315e-08,2.8e-08
FBgn0013765	2R	9326819	9337980	-	2R_9329242_SNP(trans-intra-arm)			2R_9329242_SNP,2R_9329230_SNP,2R_9329257_SNP	5.919e-14,1.449e-13,2.266e-09	2L_9153798_SNP	2.512e-08
FBgn0013771	2R	10766861	10768877	-	2R_10767708_SNP(cis),2R_10746919_SNP(trans-intra-arm)	2R_10767708_SNP,2R_10767397_SNP	1.364e-13,8.077e-12	2R_10746919_SNP	8.11e-11
FBgn0013772	2R	10774676	10776515	-	3R_9864246_SNP(trans-inter-arm)					3R_9864246_SNP	5.343e-10
FBgn0013773	2R	10758871	10761210	+	2R_10368137_SNP(trans-intra-arm),2R_10114533_SNP(trans-intra-arm),2R_5798222_SNP(trans-intra-arm)			2R_10367847_DEL,2R_10368137_SNP,2R_10109719_SNP,2R_10367903_SNP,2R_10485206_SNP,2R_10539882_SNP,2R_10349609_SNP,2R_10367908_SNP,2R_10324935_SNP,2R_10490349_SNP,2R_10439120_SNP,2R_10354693_SNP,2R_10354691_SNP,2R_10613788_SNP,2R_9160673_SNP,2R_10114533_SNP,2R_10500436_SNP,2R_10500696_SNP,2R_10367900_SNP,2R_10505312_SNP,2R_10505320_SNP,2R_10806061_SNP,2R_10372127_SNP,2R_10653626_SNP,2R_10398388_SNP,…	6.068e-16,9.842e-16,6.331e-14,6.345e-14,9.535e-14,2.533e-13,3.679e-13,6.004e-13,1.235e-12,1.35e-12,1.431e-12,1.46e-12,1.592e-12,1.639e-12,1.875e-12,2.321e-12,2.53e-12,2.741e-12,3.055e-12,4.788e-12,4.788e-12,7.091e-12,8.062e-12,1.862e-11,2.315e-11,2.553e-11,2.596e-11,4.041e-11,5.432e-11,5.477e-11,5.941e-11,6.134e-11,7.282e-11,7.69e-11,8.998e-11,1.184e-10,1.265e-10,1.271e-10,1.3e-10,1.496e-10,1.55e…
FBgn0013799	3L	19811274	19823786	+	3L_19812779_SNP(trans-intra-arm)			3L_19812779_SNP,3L_19813302_SNP,3L_19809861_SNP,3L_19806878_SNP,3L_19809079_DEL,3L_19806807_SNP,3L_19807863_SNP,3L_19812389_SNP,3L_19808739_DEL,3L_19821004_SNP,3L_19827109_SNP,3L_19807870_SNP,3L_19821003_SNP,3L_19832015_SNP,3L_19821263_DEL,3L_19805582_SNP,3L_19902183_SNP,3L_19834758_SNP,3L_19898816_SNP,3L_19902728_SNP,3L_19900254_SNP,3L_19898305_SNP,3L_19822371_SNP,3L_19902987_SNP,3L_19771438_SNP…	1.788e-27,9.925e-23,1.029e-16,1.101e-16,1.447e-16,1.583e-16,1.895e-16,6.573e-14,1.251e-13,9.253e-12,1.345e-11,1.418e-11,3.03e-11,4.039e-10,7.702e-10,1.756e-09,5.545e-09,1.746e-08,3.907e-08,9.245e-08,1.185e-07,1.882e-07,3.346e-07,3.608e-07,4.14e-07,4.499e-07,5.671e-07,5.863e-07
FBgn0013983	2R	14297301	14301104	-	2R_14297111_SNP(cis)	2R_14297111_SNP,2R_14297105_SNP	1.918e-08,2.681e-08
FBgn0014000	2L	19966727	19967685	-	2R_1487151_SNP(trans-inter-arm),2L_20495465_SNP(trans-intra-arm),2L_20549374_SNP(trans-intra-arm),2L_20857223_SNP(trans-intra-arm),2R_2788562_SNP(trans-inter-arm)			2L_20495465_SNP,2L_20549374_SNP,2L_20494830_SNP,2L_20549199_SNP,2L_20549403_SNP,2L_20549405_SNP,2L_20549104_SNP,2L_20469069_SNP,2L_20385940_SNP,2L_20606048_SNP,2L_19846228_SNP,2L_20468444_SNP,2L_20084539_SNP,2L_20469007_SNP,2L_19920905_SNP,2L_20585922_SNP,2L_20299644_SNP,2L_20526965_SNP,2L_19973554_SNP,2L_20467468_DEL,2L_20512663_SNP,2L_20468443_SNP,2L_20107017_SNP,2L_16844648_SNP,2L_16844651_SNP…	1.302e-24,2.142e-24,3.942e-24,1.883e-23,2.228e-21,2.228e-21,5.269e-21,1.261e-20,1.332e-19,1.481e-19,3.247e-19,1.539e-18,1.001e-17,1.899e-17,3.008e-17,3.642e-17,7.77e-17,2.312e-16,2.36e-16,4.498e-16,1.189e-15,1.533e-15,1.744e-15,3.595e-15,3.595e-15,4.409e-15,1.333e-14,1.406e-14,1.838e-14,2.01e-14,2.062e-14,2.673e-14,3.301e-14,4.722e-14,2.988e-13,3.934e-13,5.146e-13,5.448e-13,6.692e-13,1.295e-12,1.…	2R_1487151_SNP,2R_1488468_SNP,2R_1468105_SNP,2R_1498538_SNP,2R_1487909_SNP,2R_1496810_SNP,2R_1489765_SNP,2R_1487348_SNP,2R_1489406_SNP,2R_1486022_SNP,2R_1436748_INS,2R_1488279_SNP,2R_1488068_SNP,2R_1494344_SNP,2R_1499609_SNP,2R_1486621_SNP,2R_1488295_SNP,2R_1487281_SNP,2R_1497277_SNP,2R_1490196_SNP,2R_1489982_SNP,2R_1498145_SNP,2R_1487091_DEL,2R_1490574_SNP,2R_1484823_SNP,2R_1490942_SNP,2R_149935…	1.485e-25,2.226e-25,1.025e-24,2.655e-24,4.374e-24,5.636e-24,7.428e-23,3.636e-22,1.596e-21,2.906e-21,4.844e-21,5.472e-21,6.358e-21,6.358e-21,7.9e-21,8.688e-21,1.189e-20,1.573e-20,1.618e-20,4.442e-20,4.834e-20,5.675e-20,2.649e-19,4.275e-19,1.154e-18,1.61e-18,2.792e-18,2.794e-18,7.422e-18,1.927e-17,2.368e-17,8.923e-17,1.16e-16,1.581e-16,8.581e-16,3.64e-15,4.135e-15,1.482e-14,2.517e-14,6.898e-14,9.26…
FBgn0014020	2R	11990192	11994734	+	2R_11993743_DEL(cis)	2R_11993743_DEL	9.295e-16
FBgn0014022	3R	5339049	5340549	+	3R_5325250_SNP(trans-intra-arm),3R_26361176_SNP(trans-intra-arm)	3R_5339116_SNP,3R_5339402_SNP,3R_5339044_SNP	6.345e-11,4.593e-10,3.899e-08	3R_5325250_SNP,3R_5318894_SNP,3R_5335977_SNP,3R_5324903_SNP,3R_5331455_SNP,3R_5325132_SNP,3R_5325867_SNP,3R_5344235_SNP,3R_5321029_SNP,3R_5334572_SNP,3R_5348698_SNP,3R_5349388_SNP,3R_5327406_SNP,3R_26361176_SNP,3R_5331433_SNP,3R_5325497_SNP,3R_5353968_SNP,3R_5364366_SNP	5.316e-11,4.412e-10,5.279e-10,9.438e-10,1.004e-09,1.578e-09,2.191e-09,5.284e-09,6.634e-09,9.924e-09,3.742e-08,6.688e-08,1.066e-07,1.254e-07,1.686e-07,2.751e-07,4.95e-07,6.403e-07
FBgn0014032	X	8357329	8358471	-	X_8358419_SNP(cis)	X_8358419_SNP	4.116e-10
FBgn0014395	X	21851573	21853299	+	X_21851498_SNP(cis),3L_11531671_INS(trans-inter-arm)	X_21851498_SNP,X_21851485_SNP	2.296e-09,1.796e-08			3L_11531671_INS	2.637e-08
FBgn0014417	2L	8408888	8411868	-	2L_8411595_SNP(cis)	2L_8411595_SNP,2L_8411312_SNP,2L_8411453_SNP,2L_8411203_SNP,2L_8411200_SNP,2L_8411888_SNP,2L_8412505_DEL,2L_8412037_SNP	1.644e-50,1.23e-20,3.207e-18,1.17e-13,2.773e-10,8.09e-09,8.862e-08,1.409e-07	2L_8413203_SNP,2L_8413202_SNP,2L_8413215_SNP,2L_8402297_SNP,2L_8410541_SNP,2L_8402292_SNP,2L_8405574_SNP,2L_12334917_SNP	1.991e-09,7.916e-09,5.523e-08,6.595e-08,8.568e-08,1.556e-07,3.266e-07,3.455e-07
FBgn0014427	3R	25026176	25027492	+	3R_25026094_SNP(cis)	3R_25026094_SNP	3.551e-13
FBgn0014930	3R	3737739	3739012	-	3R_3783539_SNP(trans-intra-arm)			3R_3783539_SNP	1.395e-08
FBgn0015032	3R	26719760	26726410	+	3R_26723629_SNP(trans-intra-arm)			3R_26723629_SNP	7.355e-09
FBgn0015035	2L	9747839	9750071	-	2L_9681581_SNP(trans-intra-arm)			2L_9681581_SNP,2L_9668019_SNP,2L_9672174_SNP,2L_9672170_SNP,2L_10181533_SNP,2L_9881231_SNP,2L_9680356_SNP,2L_9676717_SNP	1.17e-19,4.849e-16,1.666e-11,2.306e-11,7.999e-11,1.015e-10,1.18e-10,1.184e-10
FBgn0015037	2R	5127546	5129644	+	2R_5128268_SNP(cis)	2R_5128268_SNP	1.522e-11
FBgn0015038	2R	3015343	3017313	-	2R_3017354_SNP(cis)	2R_3016853_SNP,2R_3017354_SNP,2R_3016779_SNP,2R_3016798_SNP	1.228e-28,5.498e-28,2.001e-25,2.197e-25	2R_2985513_SNP,2R_3475008_SNP,2R_3475046_SNP,2R_3775808_SNP,2R_3579545_SNP,2R_2908767_SNP,2R_2985392_SNP,2R_3020102_SNP,2R_3023082_SNP,2R_3700072_SNP,2R_2985299_SNP,2R_3021673_SNP,2R_3021801_SNP,2R_2984558_SNP,2R_2999434_SNP	2.918e-20,2.606e-19,2.293e-16,8.075e-14,1.249e-13,3.338e-13,3.83e-13,1.232e-12,1.255e-12,1.387e-12,5.108e-12,3.287e-11,4.119e-11,5.175e-11,1.013e-10	2L_22178967_SNP	8.725e-11
FBgn0015039	2R	3017782	3019644	-	2R_3168469_SNP(trans-intra-arm)			2R_3168469_SNP	3.952e-11
FBgn0015075	3L	22256469	22259117	+	3L_22344790_SNP(trans-intra-arm),2L_16538409_SNP(trans-inter-arm)			3L_22344790_SNP,3L_22239192_INS,3L_22245631_SNP,3L_22344825_SNP,3L_22381313_SNP,3L_22352842_SNP,3L_22357997_SNP,3L_22392148_SNP,3L_22392229_SNP,3L_22385560_SNP,3L_22392479_SNP,3L_22302338_SNP,3L_22337365_SNP,3L_22343415_SNP,3L_22346488_SNP,3L_22348246_SNP,3L_22351222_SNP,3L_22351956_SNP,3L_22363690_SNP,3L_22365194_SNP,3L_22367053_MNP,3L_22367058_MNP,3L_22376126_SNP,3L_22383424_INS,3L_22411870_SNP…	1.066e-09,1.622e-09,1.257e-08,1.53e-08,1.724e-08,2.126e-08,2.176e-08,2.2e-08,2.2e-08,2.262e-08,2.297e-08,2.336e-08,2.336e-08,2.336e-08,2.336e-08,2.336e-08,2.336e-08,2.336e-08,2.336e-08,2.336e-08,2.336e-08,2.336e-08,2.336e-08,2.336e-08,2.336e-08,2.454e-08,2.477e-08,2.503e-08,2.547e-08,2.549e-08,2.566e-08,2.603e-08,2.607e-08,2.607e-08,2.607e-08,2.607e-08,2.607e-08,2.765e-08,2.869e-08,3.133e-08,3.2e…	2L_16538409_SNP	1.378e-06
FBgn0015240	3R	20850957	20855073	+	3R_12418403_SNP(trans-intra-arm)			3R_12418403_SNP	6.569e-09
FBgn0015277	2R	19448015	19451568	+	2R_19451486_SNP(cis),3L_3628243_SNP(trans-inter-arm)	2R_19451486_SNP,2R_19451689_SNP,2R_19451488_DEL,2R_19450852_SNP,2R_19451291_SNP	7.333e-15,1.298e-14,5.097e-12,3.422e-11,9.258e-11	2R_19452993_SNP,2R_19456310_SNP,2R_19449803_SNP,2R_19450255_SNP,2R_19457305_INS,2R_19457125_SNP,2R_19455531_SNP,2R_19456034_SNP,2R_19454283_SNP,2R_19453398_DEL,2R_19449836_SNP,2R_19455889_SNP,2R_19449524_SNP,2R_19455961_SNP,2R_19456257_SNP	4.361e-14,1.361e-10,1.838e-09,1.864e-09,4.396e-09,7.611e-09,1.628e-08,2.023e-08,2.263e-08,2.706e-08,3.561e-08,4.71e-08,6.385e-08,7.048e-08,8.817e-08	3L_3628243_SNP	4.915e-08
FBgn0015295	2R	12086931	12090389	-	2R_12088966_SNP(trans-intra-arm)			2R_12088966_SNP	2.226e-10
FBgn0015391	2L	16733617	16738388	-	2L_11199721_SNP(trans-intra-arm)			2L_11199721_SNP,2L_11199726_SNP	1.479e-09,3.523e-09
FBgn0015522	2R	13734204	13735949	+	3L_6877862_SNP(trans-inter-arm)					3L_6877862_SNP	7.223e-09
FBgn0015568	3R	3371455	3374846	-	3R_3374577_SNP(cis)	3R_3374577_SNP	5.171e-13
FBgn0015569	3R	3312305	3319567	-	3R_3316926_DEL(trans-intra-arm)			3R_3316926_DEL,3R_3323726_DEL,3R_3317628_SNP,3R_3317656_SNP,3R_3323752_SNP,3R_3320583_SNP,3R_3329485_SNP,3R_3318177_INS,3R_3323626_SNP	2.127e-09,4.794e-09,1.152e-08,1.272e-08,3.025e-08,4.684e-08,7.542e-08,7.715e-08,9.367e-08
FBgn0015570	3R	3367532	3370952	+	2L_6754421_SNP(trans-inter-arm)					2L_6754421_SNP	2.229e-09
FBgn0015571	3R	3364694	3367353	-	3R_3396439_SNP(trans-intra-arm)	3R_3363696_SNP,3R_3364323_SNP,3R_3364216_INS,3R_3366925_SNP,3R_3367085_SNP	1.142e-08,2.718e-07,3.049e-07,3.056e-07,7.294e-07	3R_3399959_SNP,3R_3400873_SNP,3R_3403666_SNP,3R_3396516_SNP,3R_3409407_SNP,3R_3401683_DEL,3R_3358444_SNP,3R_3335308_SNP,3R_3409298_SNP,3R_3392233_SNP,3R_3396439_SNP,3R_3340033_SNP,3R_3330360_SNP,3R_3395786_SNP,3R_3389538_SNP,3R_3351515_SNP,3R_3342966_SNP,3R_3366140_SNP,3R_3410336_SNP,3R_3368671_SNP,3R_3391214_SNP,3R_3460428_SNP,3R_3353870_SNP,3R_3330461_SNP,3R_3395570_DEL,3R_3357514_SNP,3R_335048…	8.542e-11,2.452e-10,2.531e-10,2.845e-10,2.13e-09,2.149e-09,3.228e-09,5.286e-09,5.473e-09,6.437e-09,7.78e-09,7.788e-09,8.2e-09,9.659e-09,1.095e-08,1.164e-08,1.28e-08,1.715e-08,1.933e-08,2.374e-08,2.636e-08,3.667e-08,3.783e-08,3.94e-08,5.016e-08,5.595e-08,6.291e-08,6.677e-08,6.828e-08,7.577e-08,8.856e-08,1.183e-07,1.217e-07,1.235e-07,1.472e-07,1.482e-07,1.54e-07,1.648e-07,1.707e-07,1.805e-07,2.062e…
FBgn0015582	2R	7178499	7180679	-	2R_7178536_SNP(cis)	2R_7178536_SNP	2.682e-13
FBgn0015622	3R	25140976	25145366	-	3R_25144974_SNP(cis),3R_25143140_SNP(trans-intra-arm)	3R_25144974_SNP,3R_25141462_SNP,3R_25140956_SNP,3R_25144627_SNP,3R_25144735_SNP,3R_25144940_DEL	2.889e-13,2.049e-08,2.253e-08,4.232e-08,1.048e-07,1.709e-07	3R_25135817_SNP,3R_25142343_SNP,3R_25143520_SNP,3R_25143074_SNP,3R_25143498_SNP,3R_25143140_SNP,3R_25143237_SNP,3R_25135851_SNP,3R_25144236_SNP	6.323e-09,8.485e-09,1.095e-08,6.886e-08,7.099e-08,9.565e-08,1.325e-07,2.875e-07,4.002e-07
FBgn0015663	2L	3619097	3621573	+	2L_3619271_SNP(cis),2L_3620869_SNP(cis)	2L_3619271_SNP,2L_3619325_SNP,2L_3619210_SNP,2L_3618665_SNP,2L_3619336_SNP,2L_3620869_SNP,2L_3619996_SNP	1.993e-13,1.993e-13,4.022e-13,1.798e-11,7.889e-10,5.409e-09,6.266e-09	2L_3617097_SNP,2L_3617119_SNP,2L_3615755_SNP,2L_3620165_SNP,2L_3620258_SNP,2L_3620249_SNP,2L_3614948_SNP,2L_3623116_SNP,2L_3620170_SNP	1.943e-10,1.968e-10,1.834e-09,2.048e-09,2.088e-09,5.993e-09,8.454e-09,4.532e-08,4.972e-08	3L_13970137_SNP	7.95e-10
FBgn0015714	2R	10761458	10763244	+	2R_10763630_SNP(cis)	2R_10763630_SNP,2R_10761412_SNP,2R_10763318_SNP,2R_10763674_SNP	1.559e-36,1.917e-34,2.327e-33,3.486e-20	2R_10764509_SNP,2R_10764362_SNP,2R_10764512_SNP,2R_10764465_SNP,2R_10768238_SNP,2R_10766917_SNP,2R_10751899_SNP,2R_10766879_SNP,2R_10771451_SNP,2R_10771452_SNP,2R_10767004_SNP,2R_10766959_SNP,2R_10766890_SNP,2R_10771343_SNP,2R_10767857_SNP,2R_10772376_SNP,2R_10764464_SNP,2R_10764379_SNP,2R_10764570_SNP,2R_10770502_SNP,2R_10767144_SNP,2R_10773840_SNP,2R_10767090_DEL,2R_10776270_SNP,2R_7157540_DEL,…	1.781e-29,5.034e-25,2.803e-23,1.04e-22,3.229e-14,1.007e-12,1.888e-12,4.564e-12,1.323e-11,1.373e-11,1.396e-11,2.605e-11,3.598e-11,7.004e-11,1.132e-09,1.444e-09,1.793e-09,2.228e-09,2.569e-09,2.922e-09,3.381e-09,4.062e-09,4.541e-09,6.505e-09,6.602e-09,6.912e-09,7.034e-09,7.915e-09,8.679e-09,8.995e-09,1.084e-08,1.26e-08,1.504e-08,1.54e-08,2.103e-08,4.439e-08,4.461e-08,5.453e-08	3L_18224771_SNP,3R_5680309_SNP,3L_18221922_SNP,3L_2388955_SNP	1.069e-08,1.255e-08,3.476e-08,4.286e-08
FBgn0015773	X	14498045	14547961	-	X_14546681_SNP(trans-intra-arm)			X_14546681_SNP,X_14546774_SNP,X_19679764_SNP	6.501e-30,4.526e-11,1.179e-08
FBgn0015776	2L	6778555	6786861	-	2L_6788640_SNP(trans-intra-arm),2L_6264004_SNP(trans-intra-arm)	2L_6787659_SNP,2L_6787233_SNP,2L_6787852_INS,2L_6787293_SNP	2.796e-10,3.124e-10,5.226e-10,5.82e-10	2L_6788640_SNP,2L_6788663_SNP,2L_6788706_INS,2L_6787882_SNP,2L_6788149_SNP,2L_6788070_SNP,2L_6264004_SNP,2L_6264080_SNP,2L_6788557_SNP,2L_6788583_SNP	1.357e-10,1.439e-10,2.789e-10,1.088e-09,2.848e-09,1.306e-08,2.778e-08,1.312e-07,1.439e-07,4.151e-07
FBgn0015791	2L	14355145	14358764	+	2L_14355277_SNP(cis)	2L_14355277_SNP,2L_14355266_SNP,2L_14355324_SNP,2L_14354239_SNP,2L_14355417_SNP	1.933e-15,6.013e-14,3.628e-11,2.478e-08,3.16e-08
FBgn0015838	2R	4990743	4994301	+	2R_4994255_SNP(cis)	2R_4994255_SNP,2R_4994266_SNP,2R_4994270_INS,2R_4990790_SNP,2R_4990912_SNP	6.777e-12,1.774e-11,2.988e-09,3.249e-09,7.095e-09
FBgn0015925	2R	12152157	12154464	+	2R_17622275_SNP(trans-intra-arm)			2R_17622275_SNP	1.833e-08
FBgn0016032	2R	2936743	2939469	+	2R_2930962_SNP(trans-intra-arm)	2R_2940049_SNP,2R_2940017_SNP,2R_2940051_SNP,2R_2940016_SNP	7.831e-08,8.261e-08,8.652e-08,1.434e-07	2R_2930044_SNP,2R_2930962_SNP,2R_2927303_SNP,2R_2927314_SNP,2R_2928097_SNP,2R_2926226_SNP,2R_2928675_SNP	8.715e-09,1.316e-08,2.887e-08,8.581e-08,8.581e-08,1.118e-07,1.764e-07
FBgn0016081	3L	9624934	9672203	-	X_19925387_INS(trans-inter-arm)					X_19925387_INS	1.162e-09
FBgn0016675	2L	19417447	19418274	+	2L_19596636_SNP(trans-intra-arm),2L_19877992_INS(trans-intra-arm)			2L_19599162_DEL,2L_19459387_SNP,2L_19599118_SNP,2L_19596636_SNP,2L_19599113_SNP,2L_19599136_SNP,2L_19486668_SNP,2L_19599096_SNP,2L_19459529_SNP,2L_19472424_SNP,2L_19584324_SNP,2L_19584315_SNP,2L_19489804_SNP,2L_19489330_SNP,2L_19597785_DEL,2L_19443340_SNP,2L_19454257_SNP,2L_19598783_SNP,2L_19601687_SNP,2L_19204264_SNP,2L_19598775_SNP,2L_19899013_DEL,2L_19842701_DEL,2L_19595752_SNP,2L_19880426_SNP…	1.183e-13,3.344e-13,4.377e-13,7.29e-13,7.952e-13,1.003e-12,1.358e-12,1.475e-12,6.604e-12,6.731e-12,3.549e-11,3.585e-11,5.39e-11,5.651e-11,6.052e-11,7.258e-11,1.027e-10,1.21e-10,1.322e-10,1.328e-10,1.621e-10,2.27e-10,6.07e-10,7.21e-10,7.259e-10,7.479e-10,7.529e-10,7.761e-10,8.204e-10,8.949e-10,1e-09,1.139e-09,1.162e-09,1.176e-09,1.366e-09,1.373e-09,1.413e-09,1.676e-09,1.702e-09,1.787e-09,1.798e-09…	X_1384732_SNP,3L_4947243_SNP,2R_20718038_SNP	5.168e-08,2.516e-07,2.661e-07
FBgn0016693	3R	8523044	8530597	+	3R_8523772_SNP(cis)	3R_8523772_SNP,3R_8523874_SNP,3R_8522385_SNP	1.442e-18,1.567e-09,1.883e-09	3R_8521192_SNP	2.88e-09
FBgn0016696	3L	20764628	20770031	+	3L_20764933_SNP(cis)	3L_20764933_SNP,3L_20771009_SNP	1.046e-14,2.017e-09	3L_20762766_SNP,3L_20767035_SNP,3L_20768303_SNP,3L_20760641_SNP,3L_20771273_SNP,3L_20778313_SNP,3L_20777682_SNP,3L_20775705_SNP,3L_20760144_SNP,3L_20778448_SNP,3L_20773032_SNP,3L_20782952_SNP,3L_20782956_DEL,3L_20784594_SNP,3L_20782954_SNP,3L_20761432_SNP,3L_20761418_SNP,3L_20782947_DEL	1.533e-14,1.312e-11,1.504e-11,3.357e-11,5.73e-11,6.92e-11,3.346e-10,7.473e-10,3.632e-09,6.394e-09,6.794e-09,7.504e-09,1.848e-08,2.57e-08,3.808e-08,5.8e-08,1.002e-07,2.678e-07
FBgn0016698	2L	3377002	3378590	+	2L_3378508_SNP(cis)	2L_3378508_SNP,2L_3378511_SNP	6.731e-10,2.023e-09
FBgn0016715	3L	605165	606569	-	3L_605292_SNP(cis),3L_608485_DEL(trans-intra-arm)	3L_605292_SNP,3L_604355_SNP,3L_605758_SNP,3L_604428_SNP,3L_605734_SNP,3L_607068_SNP,3L_606474_SNP,3L_604439_SNP,3L_606094_SNP,3L_604487_SNP,3L_607035_SNP	7.489e-12,1.462e-09,2.506e-09,6.053e-09,5.933e-08,1.621e-07,2.108e-07,2.136e-07,2.674e-07,5.094e-07,5.713e-07	3L_608485_DEL,3L_609078_SNP,3L_608509_SNP,3L_609086_SNP,3L_609091_SNP,3L_608540_SNP,3L_608471_SNP,3L_5897553_SNP,3L_608541_SNP,3L_608988_SNP,3L_609438_INS,3L_2255341_INS,3L_609077_SNP,3L_600971_SNP,3L_608265_SNP	8.548e-10,6.399e-09,8.063e-09,1.6e-08,2.146e-08,2.637e-08,3.197e-08,3.386e-08,6.381e-08,7.598e-08,1.123e-07,1.199e-07,1.344e-07,3.868e-07,5.227e-07
FBgn0016762	2R	19581526	19582755	+	2R_19581567_SNP(cis),2L_3616457_SNP(trans-inter-arm)	2R_19581567_SNP,2R_19580922_SNP,2R_19581320_SNP,2R_19581359_SNP,2R_19581385_SNP,2R_19581297_SNP,2R_19581212_SNP,2R_19581417_SNP,2R_19581288_SNP,2R_19582102_SNP,2R_19581615_SNP	3.134e-12,2.2e-10,2.88e-09,2.913e-09,3.506e-09,3.574e-09,4.102e-09,4.677e-09,5.367e-09,6.908e-09,7.685e-09	2R_19577394_SNP	1.503e-08	2L_3616457_SNP	1.146e-07
FBgn0016919	2L	21578292	21589423	-	2L_21607993_SNP(trans-intra-arm)			2L_21607993_SNP,2L_21620922_SNP,2L_21619546_SNP,2L_21606150_SNP,2L_21593960_SNP,2L_21593207_SNP,2L_21396905_SNP,2L_21606208_SNP,2L_21396251_INS,2L_21606015_SNP,2L_21605876_SNP,2L_21382935_SNP,2L_21617612_SNP,2L_21402478_SNP,2L_21781991_SNP,2L_21771735_SNP	1.446e-10,1.873e-10,8.983e-10,2.262e-09,2.263e-09,3.499e-09,5.126e-09,5.319e-09,8.32e-09,2.967e-08,3.829e-08,3.932e-08,6.891e-08,7.22e-08,7.557e-08,1.562e-07
FBgn0016926	2L	1114654	1128953	-	2L_1119160_SNP(trans-intra-arm),2L_1126836_SNP(trans-intra-arm)	2L_1114935_SNP,2L_1114933_SNP,2L_1114134_SNP	8.928e-09,1.396e-08,1.749e-07	2L_1119160_SNP,2L_1121029_SNP,2L_1119349_SNP,2L_1119278_SNP,2L_1126836_SNP,2L_1118520_DEL,2L_1118829_SNP,2L_1126851_SNP,2L_1120403_SNP,2L_1126726_DEL,2L_1113552_SNP,2L_1118926_SNP,2L_1118883_SNP	1.129e-09,5.246e-09,9.856e-09,2.137e-08,5.166e-08,7.792e-08,9.113e-08,1.461e-07,2.258e-07,2.405e-07,3.263e-07,4.136e-07,4.148e-07
FBgn0017448	3R	27581078	27584359	-	3R_27594433_SNP(trans-intra-arm)	3R_27584102_SNP,3R_27584183_SNP,3R_27584442_SNP	1.497e-10,3.321e-09,3.919e-08	3R_27594433_SNP,3R_27597079_SNP,3R_27596855_SNP,3R_27578269_SNP,3R_27604694_SNP,3R_27570175_SNP,3R_27590683_INS,3R_27613999_SNP,3R_27603412_SNP,3R_27599683_SNP,3R_27626990_SNP,3R_27602552_SNP,3R_27601994_SNP,3R_27598508_SNP,3R_27599328_SNP,3R_27599866_SNP	1.452e-10,2.171e-10,2.435e-10,1.166e-09,2.02e-09,2.371e-09,4.689e-09,4.944e-09,5.222e-09,1.39e-08,1.933e-08,1.979e-08,2.194e-08,2.824e-08,3.935e-08,8.591e-08
FBgn0017545	4	85851	87833	-	4_87861_SNP(cis),2R_17667113_SNP(trans-inter-arm)	4_87861_SNP	2.974e-08	4_256195_SNP,4_233053_SNP,4_169766_SNP,4_154371_SNP,4_65490_SNP,4_164108_SNP,4_134742_SNP,4_264844_SNP,4_165861_SNP,4_163904_SNP,4_126523_SNP,4_233074_SNP,4_158825_SNP,4_168032_SNP,4_76784_SNP,4_238387_SNP,4_200427_SNP,4_68193_SNP,4_162053_SNP,4_285539_SNP,4_169875_SNP,4_162054_SNP,4_244722_SNP,4_115375_DEL,4_69351_SNP	4.289e-08,4.564e-08,5.521e-08,5.856e-08,9.993e-08,1.193e-07,1.221e-07,1.243e-07,1.451e-07,1.511e-07,1.692e-07,1.787e-07,2.216e-07,3.001e-07,3.044e-07,3.805e-07,3.922e-07,3.961e-07,4.487e-07,5.002e-07,5.151e-07,5.407e-07,6.378e-07,7.279e-07,7.94e-07	2R_17667113_SNP	2.186e-07
FBgn0017566	X	8142684	8145720	-	X_8142895_SNP(cis)	X_8142895_SNP,X_8142795_SNP,X_8142738_SNP,X_8142379_SNP,X_8142363_SNP,X_8142374_SNP,X_8142385_SNP,X_8142337_SNP,X_8143183_SNP,X_8142562_SNP,X_8142664_SNP	1.47e-31,2.261e-22,4.661e-19,1.443e-12,1.544e-12,1.649e-12,1.921e-12,2.432e-08,1.565e-07,1.623e-07,1.941e-07	X_8140284_SNP	7.509e-08	3L_5651471_INS	7.406e-08
FBgn0019890	2L	13898828	13904661	-	2L_13901743_SNP(trans-intra-arm)			2L_13901743_SNP	3.61e-10
FBgn0019932	2L	10339457	10341503	+	3L_1885372_SNP(trans-inter-arm)					3L_1885372_SNP,3L_1885292_SNP,3L_1885473_SNP	5.82e-09,4.784e-08,9.204e-08
FBgn0019957	3R	17853431	17855115	+	3R_17854375_SNP(cis)	3R_17854375_SNP,3R_17854445_SNP,3R_17854387_SNP,3R_17854366_SNP	3.801e-31,4.172e-25,3.912e-23,4.654e-23
FBgn0019982	2L	4455137	4456807	-	2L_4455156_SNP(cis)	2L_4455156_SNP,2L_4454932_SNP,2L_4455150_SNP,2L_4455085_SNP	1.3e-10,7.412e-09,1.019e-08,5.466e-08
FBgn0020270	2L	11282090	11284335	+	2L_11282852_SNP(cis)	2L_11282852_SNP,2L_11282675_SNP	4.614e-10,4.669e-10
FBgn0020300	3L	18132502	18138518	+	3L_18134495_DEL(trans-intra-arm)			3L_18134495_DEL,3L_18134596_SNP,3L_18134598_SNP,3L_18134595_SNP,3L_18134477_INS,3L_18134575_SNP,3L_18134032_SNP,3L_18134536_SNP,3L_18134601_SNP,3L_18134602_SNP,3L_18134015_DEL,3L_18134656_DEL,3L_18133710_SNP,3L_18134655_SNP,3L_18128282_SNP,3L_18134654_SNP	4.273e-09,1.09e-08,1.172e-08,1.18e-08,1.483e-08,2.208e-08,4.041e-08,6.939e-08,1.864e-07,1.945e-07,2.674e-07,3.085e-07,4.113e-07,4.627e-07,4.948e-07,5.957e-07
FBgn0020306	2R	17210935	17229352	+	2R_17223297_SNP(trans-intra-arm)			2R_17223297_SNP	5.043e-09
FBgn0020381	X	527655	529578	-	X_550697_SNP(trans-intra-arm),X_537164_SNP(trans-intra-arm)	X_526709_SNP,X_529713_SNP,X_527734_SNP,X_529365_SNP,X_526932_SNP,X_529965_SNP,X_526874_SNP,X_529729_DEL	1.052e-25,2.34e-25,5.666e-25,1.154e-07,4.139e-07,4.994e-07,5.738e-07,5.082e-06	X_550697_SNP,X_531223_SNP,X_542539_SNP,X_534858_SNP,X_532809_SNP,X_534058_SNP,X_542899_SNP,X_553195_SNP,X_526196_SNP,X_522166_SNP,X_519292_SNP,X_520676_SNP,X_522766_SNP,X_552118_SNP,X_542353_DEL,X_548403_DEL,X_525488_SNP,X_555157_SNP,X_555686_SNP,X_485156_SNP,X_555398_SNP,X_625098_SNP,X_625410_SNP,X_489156_SNP,X_624175_INS,X_623441_SNP,X_624270_SNP,X_604848_SNP,X_625417_SNP,X_622962_SNP,X_621093_…	1.457e-27,2.273e-26,6.7e-26,1.116e-25,2.078e-25,4.371e-25,1.574e-24,4.273e-24,1.425e-23,3.821e-23,1.837e-22,1.732e-21,1.774e-21,8.37e-21,3.087e-20,5.274e-20,8.497e-20,9.947e-19,9.488e-18,3.094e-17,1.839e-16,4.183e-16,4.979e-16,2.019e-15,2.041e-15,2.353e-15,2.813e-15,3.768e-15,3.861e-15,3.935e-15,1.303e-14,1.391e-14,2.446e-14,2.68e-14,3.177e-14,4.445e-14,4.696e-14,5.185e-14,5.402e-14,7.533e-14,7.8…	3L_13655855_SNP,2L_4358924_SNP,3L_1910342_SNP,2R_17990242_SNP,2L_19719631_SNP,3R_9499398_SNP,3R_9499400_SNP,3L_11666075_SNP,3L_11666072_SNP,3L_11666055_SNP,2L_5686402_SNP,2L_18946567_SNP,3L_2793492_SNP	1.198e-06,3.566e-06,4.022e-06,4.494e-06,6.199e-06,6.221e-06,6.51e-06,6.827e-06,6.846e-06,7.18e-06,7.875e-06,8.074e-06,8.262e-06
FBgn0020392	3L	8169235	8171529	-	3L_21762552_SNP(trans-intra-arm),2L_16931801_SNP(trans-inter-arm)			3L_21762552_SNP	1.278e-08	2L_16931801_SNP	1.447e-08
FBgn0020407	3R	12089993	12092613	+	3L_10750673_SNP(trans-inter-arm)					3L_10750673_SNP	1.008e-08
FBgn0020414	2L	16450907	16455194	+	2L_16451126_SNP(cis),3L_7922570_SNP(trans-inter-arm),2L_16465012_SNP(trans-intra-arm)	2L_16451126_SNP,2L_16455895_SNP,2L_16455971_SNP,2L_16455962_SNP,2L_16455144_SNP,2L_16455994_SNP,2L_16456002_SNP,2L_16456005_DEL,2L_16456062_SNP	8.502e-14,7.408e-11,7.799e-11,8.859e-11,1.79e-07,3.506e-07,3.506e-07,3.506e-07,4.226e-07	2L_16444963_SNP,2L_16444988_SNP,2L_16444961_SNP,2L_16444872_SNP,2L_16444864_SNP,2L_16444877_DEL,2L_16444919_SNP,2L_16444800_SNP,2L_16444799_SNP,2L_16444965_SNP,2L_16444778_SNP,2L_16460773_SNP,2L_16444865_DEL,2L_16465012_SNP,2L_16460499_DEL,2L_16460581_SNP,2L_16461145_SNP,2L_16444470_SNP	3.997e-11,4.565e-11,4.822e-11,5.087e-11,5.85e-11,6.785e-11,7.13e-11,1.183e-10,2.725e-10,7.659e-10,1.832e-09,2.355e-09,4.266e-09,1.467e-08,5.674e-08,7.212e-08,4.28e-07,4.587e-07	3L_7922570_SNP,3L_7924221_SNP	2.4e-07,2.509e-07
FBgn0020415	2L	16447330	16450508	+	2L_16447653_SNP(cis),2L_16446929_SNP(cis),2L_16318268_SNP(trans-intra-arm)	2L_16447653_SNP,2L_16446929_SNP,2L_16447028_SNP,2L_16446961_SNP,2L_16447603_SNP,2L_16447035_SNP,2L_16447489_SNP,2L_16446800_SNP,2L_16448030_SNP,2L_16447667_SNP,2L_16447685_SNP,2L_16446620_SNP,2L_16446845_SNP,2L_16446856_SNP	4.989e-11,6.393e-11,7.038e-11,1.268e-10,1.906e-10,3.599e-10,4.115e-10,7.266e-10,2.443e-09,1.9e-08,6.925e-08,7.351e-08,7.427e-08,1.734e-07	2L_16318268_SNP	1.716e-08
FBgn0020621	2R	5139815	5172602	-	2R_5142918_SNP(trans-intra-arm)			2R_5142918_SNP,2R_5149499_SNP	3.667e-09,6.546e-09
FBgn0020767	2R	10647151	10656928	-	2R_10653626_SNP(trans-intra-arm)			2R_10653626_SNP	2.351e-10
FBgn0020887	3L	19911342	19916562	-	3L_19916695_SNP(cis)	3L_19916695_SNP	5.298e-09	3L_19907463_SNP,3L_19907412_SNP	1.942e-08,3.437e-08
FBgn0021856	2L	21261168	21262411	+	2R_3474437_SNP(trans-inter-arm)					2R_3474437_SNP	1.545e-08
FBgn0021906	2L	1612429	1614160	-	2L_1616040_SNP(trans-intra-arm),2L_2109970_DEL(trans-intra-arm)	2L_1612935_SNP,2L_1613508_SNP,2L_1613478_SNP	6.744e-09,1.395e-08,2.624e-08	2L_1616040_SNP,2L_1616204_SNP,2L_2109970_DEL,2L_1616747_SNP	3.884e-11,2.1e-08,4.394e-08,6.687e-08
FBgn0022349	3R	27573365	27577616	+	3R_27573856_SNP(cis),2L_9181030_SNP(trans-inter-arm),3L_7873055_SNP(trans-inter-arm),3L_2139784_SNP(trans-inter-arm)	3R_27573856_SNP,3R_27573877_SNP,3R_27574068_SNP,3R_27577732_SNP,3R_27576775_SNP,3R_27577487_SNP	4.912e-13,4.912e-13,5.194e-13,1.711e-11,1.953e-11,1.967e-11	3R_27566557_SNP,3R_27575647_SNP,3R_27562030_SNP,3R_27650469_SNP,3R_27659325_SNP,3R_27810587_SNP,3R_27648412_SNP,3R_27875662_SNP,3R_27765936_SNP,3R_27680495_SNP,3R_27685790_SNP,3R_27598247_SNP,3R_27670779_SNP,3R_27669836_SNP,3R_27873463_SNP,3R_27723079_SNP,3R_27590228_SNP,3R_27859123_SNP,3R_27580713_SNP,3R_27650498_SNP,3R_27649214_SNP,3R_27650898_SNP,3R_27651373_SNP,3R_27658183_SNP,3R_27682441_SNP…	5.537e-14,5.847e-14,2.091e-13,4.869e-13,5.795e-13,5.983e-13,8.123e-13,9.688e-13,1.021e-12,1.034e-12,1.034e-12,1.131e-12,1.157e-12,1.212e-12,1.212e-12,1.3e-12,1.351e-12,1.376e-12,1.397e-12,1.491e-12,1.763e-12,1.763e-12,1.763e-12,1.763e-12,1.817e-12,1.864e-12,2.032e-12,2.202e-12,2.275e-12,2.379e-12,2.379e-12,2.465e-12,2.533e-12,2.569e-12,2.778e-12,2.832e-12,2.91e-12,3.002e-12,3.008e-12,3.011e-12,3.…	3L_5482686_SNP,3L_5482704_DEL,3L_15194050_SNP,3L_2139784_SNP,3L_5482695_DEL,3L_5482730_SNP,3L_7873055_SNP,2L_9529709_SNP,3L_11521522_SNP,3L_5551179_SNP,2L_9181030_SNP,3L_20668002_SNP,3L_11521524_SNP,X_3072454_SNP,X_8177152_SNP	7.864e-07,9.519e-07,1.285e-06,1.727e-06,1.766e-06,3.235e-06,3.827e-06,4.481e-06,5.451e-06,5.929e-06,7.242e-06,8.131e-06,9.351e-06,9.629e-06,9.838e-06
FBgn0022359	3R	6702106	6703979	+	3R_6702330_SNP(cis)	3R_6702330_SNP,3R_6701819_DEL,3R_6701905_SNP,3R_6701851_SNP,3R_6701876_INS,3R_6702928_SNP	1.478e-27,1.398e-19,1.867e-17,3.891e-17,1.509e-15,8.214e-15	3R_6722618_SNP	1.288e-09
FBgn0022702	3L	1752328	1755934	-	3L_1755296_SNP(cis)	3L_1755296_SNP	2.368e-11
FBgn0022986	2R	18300061	18303023	-	2R_18302005_SNP(trans-intra-arm),2R_18302449_SNP(cis)	2R_18302437_SNP,2R_18302619_DEL,2R_18303204_SNP,2R_18303190_SNP,2R_18302449_SNP,2R_18303133_SNP,2R_18302591_SNP,2R_18302592_SNP,2R_18302269_SNP,2R_18303585_SNP,2R_18303166_SNP,2R_18302374_SNP	2.384e-11,3.289e-10,5.474e-10,5.921e-10,2.874e-09,3.326e-09,3.345e-09,3.619e-09,3.822e-09,4.227e-09,5.884e-09,2.062e-08	2R_18302005_SNP,2R_18301876_SNP,2R_18304465_SNP,2R_18304546_SNP,2R_18304306_SNP,2R_18306411_SNP,2R_18306258_SNP,2R_18301834_SNP,2R_18301301_SNP	3.426e-15,2.002e-12,2.497e-12,3.693e-12,9.216e-10,3.583e-09,1.917e-08,2.392e-08,4.243e-07
FBgn0023090	2L	21361216	21367288	+	2L_21317847_INS(trans-intra-arm),2L_21344606_SNP(trans-intra-arm)	2L_21361803_SNP,2L_21360655_SNP,2L_21366668_SNP,2L_21366785_INS,2L_21360852_SNP,2L_21360528_SNP,2L_21367661_SNP,2L_21367660_SNP,2L_21360559_SNP	1.764e-09,3.207e-09,4.872e-09,2.937e-08,4.259e-08,1.372e-06,3.151e-06,5.511e-06,5.569e-06	2L_21315619_SNP,2L_21316724_SNP,2L_21333163_SNP,2L_21308245_SNP,2L_21329355_SNP,2L_21333185_DEL,2L_21306464_SNP,2L_21306451_SNP,2L_21323137_DEL,2L_21335597_SNP,2L_21326500_SNP,2L_21317847_INS,2L_21299847_SNP,2L_21299850_SNP,2L_21330514_SNP,2L_21312297_SNP,2L_21344606_SNP,2L_21305645_SNP,2L_21298948_SNP,2L_21330571_SNP,2L_21330802_SNP,2L_21359494_SNP,2L_21326491_SNP,2L_21344269_SNP,2L_21334211_SNP…	1.287e-22,2.065e-22,3.576e-22,4.412e-22,9.03e-22,1.097e-21,4.759e-20,1.017e-19,1.956e-19,2.106e-19,2.111e-19,3.084e-19,8.099e-19,1.995e-18,2.217e-18,4.626e-18,8.254e-18,1.027e-17,1.764e-17,1.821e-17,1.949e-17,2.036e-17,2.449e-17,2.929e-17,2.972e-17,3.585e-17,3.615e-17,6.14e-17,6.251e-17,1.045e-16,1.289e-16,2.354e-16,2.471e-16,2.606e-16,2.954e-16,3.642e-16,3.691e-16,3.961e-16,4.091e-16,6.147e-16,6…	3L_2464433_SNP,3L_11431043_SNP,3L_2464435_SNP,3R_19206415_SNP,3L_11103542_SNP,3L_10167266_SNP,3R_5658180_SNP,2R_18997056_SNP,3L_11431036_SNP,X_12331050_SNP,X_11656418_SNP,X_4877934_SNP,3L_11431033_SNP,2R_6658209_SNP,X_12331056_SNP,X_10206759_SNP,2R_1525997_SNP,3L_12014715_SNP,3L_10303474_SNP,2R_1525998_SNP,X_4878300_SNP	1.926e-07,7.582e-07,1.133e-06,3.151e-06,3.167e-06,3.648e-06,4.203e-06,4.262e-06,4.903e-06,5.353e-06,5.411e-06,5.414e-06,5.793e-06,6.273e-06,6.782e-06,7.558e-06,8.289e-06,8.478e-06,8.826e-06,8.943e-06,9.65e-06
FBgn0023094	3L	19806870	19809038	-	3L_19809062_SNP(cis),2L_11168457_SNP(trans-inter-arm)	3L_19809062_SNP,3L_19809109_SNP,3L_19808394_SNP,3L_19807870_SNP	4.426e-11,4.426e-11,1.799e-09,1.554e-08	3L_19811036_SNP,3L_19821234_SNP,3L_19823326_SNP,3L_19810678_SNP	1.27e-10,4.835e-10,1.124e-08,2.069e-08	2L_11168457_SNP,2L_11168456_SNP,2L_11168459_INS,2L_11168295_SNP	4.743e-09,4.944e-09,5.348e-09,6.393e-08
FBgn0023095	3L	13221792	13272742	+	3L_12108484_SNP(trans-intra-arm)			3L_12108453_SNP,3L_12108484_SNP	9.611e-09,1.674e-08
FBgn0023171	2R	3818559	3819885	-	2R_3819864_SNP(cis)	2R_3819864_SNP,2R_3819100_SNP	3.297e-15,2.036e-09
FBgn0023179	3R	22523419	22539881	-	2L_995748_SNP(trans-inter-arm)					2L_995748_SNP	1.146e-08
FBgn0023197	3L	17539839	17542227	-	3L_17538115_SNP(trans-intra-arm)	3L_17539839_SNP	2.456e-11	3L_17538115_SNP,3L_17538090_SNP,3L_17538100_SNP,3L_17538550_SNP,3L_17537339_SNP,3L_17537340_SNP,3L_17537350_DEL,3L_17541104_SNP	5.428e-27,8.726e-27,8.726e-27,1.221e-16,1.05e-12,5.925e-12,2.989e-11,7.607e-10
FBgn0023215	X	3565834	3595705	+	X_3593071_SNP(trans-intra-arm)			X_3593071_SNP,X_3593049_SNP,X_3593079_DEL,X_3592570_SNP,X_3593077_SNP,X_3592412_SNP,X_3591132_SNP,X_3593479_SNP	5.53e-11,8.361e-11,8.665e-11,3e-10,3.517e-10,1.981e-09,2.945e-09,1.954e-08
FBgn0023441	2R	11544823	11564174	-	2R_11551906_SNP(trans-intra-arm),X_10380189_SNP(trans-inter-arm)			2R_11551816_SNP,2R_11551906_SNP,2R_11552971_SNP,2R_11554794_SNP,2R_11552899_SNP,2R_11554851_SNP,2R_11554842_DEL,2R_11554850_SNP,2R_11554931_SNP,2R_11554817_SNP,2R_11550658_SNP,2R_11551983_SNP,2R_11555075_SNP,2R_11552997_SNP,2R_11554587_SNP,2R_11552004_SNP,2R_11551499_SNP	4.587e-11,2.104e-10,3.074e-09,3.236e-09,6.767e-09,8.224e-09,8.309e-09,8.743e-09,1.099e-08,1.153e-08,1.215e-08,1.712e-08,5.536e-08,5.994e-08,9.382e-08,1.246e-07,1.554e-07	X_10380189_SNP	8.978e-08
FBgn0023489	2L	577486	579549	+	2L_1303924_SNP(trans-intra-arm)			2L_1303924_SNP,2L_1303982_SNP,2L_1303802_SNP,2L_1938633_DEL,2L_1303971_SNP,2L_2316035_INS	5.022e-10,1.267e-09,6.264e-09,1.344e-08,1.838e-08,4.667e-08
FBgn0023495	3R	9195962	9197626	-	3R_9197473_SNP(cis),2R_5886914_SNP(trans-inter-arm)	3R_9197473_SNP,3R_9197600_SNP,3R_9197679_SNP,3R_9197777_SNP	3.607e-10,1.411e-08,2.983e-07,3.322e-07	3R_9181993_SNP,3R_9193725_SNP,3R_9181242_SNP,3R_9200371_SNP,3R_9200382_SNP,3R_9193779_SNP,3R_9182410_SNP,3R_9193668_SNP,3R_9181042_SNP,3R_9193757_SNP,3R_9183475_SNP,3R_9192834_SNP,3R_9187647_SNP,3R_9201233_INS,3R_9158074_SNP,3R_24414471_SNP,3R_9187561_SNP,3R_9202716_SNP,3R_9192972_SNP,3R_9110085_DEL,3R_9113409_SNP,3R_9299349_SNP,3R_9179747_SNP,3R_9258726_SNP	9.552e-10,1.791e-09,3.032e-09,3.036e-09,3.115e-09,4.347e-09,1.166e-08,1.217e-08,2.327e-08,2.496e-08,3.494e-08,4.579e-08,6.312e-08,6.358e-08,6.818e-08,6.976e-08,1.669e-07,2.518e-07,5.873e-07,6.059e-07,6.903e-07,7.269e-07,7.431e-07,7.66e-07	2R_5880620_SNP,2R_5891427_SNP,2R_5880677_SNP,2R_5887491_SNP,2R_5878473_SNP,2R_5881846_SNP,2R_5886953_SNP,2R_5886818_SNP,2R_5880124_SNP,2R_5886879_SNP,2R_5874300_SNP,2R_5895796_SNP,2R_5892606_SNP,2R_5880851_SNP,2R_5880676_SNP,2R_5885561_SNP,2R_5876653_SNP,2R_5892443_DEL,2R_5892416_SNP,2R_5891988_SNP,2R_5881077_SNP,2R_5886914_SNP,2R_5885446_INS,2R_5891668_SNP,2R_5886889_SNP,2R_5892423_DEL,2R_588624…	3.871e-10,4.343e-10,7.535e-10,7.535e-10,8.585e-10,1.002e-09,1.58e-09,3.284e-09,3.34e-09,7.354e-09,8.332e-09,1.562e-08,1.565e-08,1.897e-08,3.533e-08,3.746e-08,4.233e-08,7.243e-08,9.075e-08,1.806e-07,1.924e-07,3.481e-07,3.567e-07,5.017e-07,5.204e-07,5.611e-07,6.404e-07,7.309e-07,7.512e-07,8.24e-07
FBgn0023507	X	2035522	2038970	+	X_2035442_SNP(cis),X_2283436_SNP(trans-intra-arm),X_2412972_SNP(trans-intra-arm)	X_2035377_SNP,X_2035824_SNP,X_2035851_SNP,X_2035919_SNP,X_2035836_SNP,X_2035850_SNP,X_2035716_SNP,X_2035437_SNP,X_2035442_SNP,X_2036046_SNP,X_2035719_SNP,X_2038609_SNP,X_2035965_DEL,X_2039075_SNP,X_2039159_SNP,X_2035760_SNP,X_2035419_SNP,X_2035956_SNP,X_2034789_SNP	2.287e-23,3.462e-23,5.132e-23,1.45e-22,1.669e-22,1.799e-22,2.813e-22,4.42e-22,2.393e-21,3.472e-21,6.569e-21,3.709e-18,3.985e-14,3.362e-10,6.347e-10,1.213e-08,1.943e-08,8.44e-08,1.084e-06	X_2022643_SNP,X_2036988_SNP,X_2033519_SNP,X_2028497_SNP,X_2019502_SNP,X_2028483_SNP,X_2036619_DEL,X_2037297_SNP,X_2045199_SNP,X_2046624_SNP,X_2041591_SNP,X_2019886_DEL,X_2054364_SNP,X_2054347_SNP,X_2034133_DEL,X_2051603_SNP,X_2054291_SNP,X_2054561_SNP,X_2054512_SNP,X_2040741_DEL,X_2055222_SNP,X_2054471_SNP,X_2055231_SNP,X_2042778_INS,X_2055234_SNP,X_2047912_SNP,X_2054585_SNP,X_2042145_SNP,X_20431…	4.355e-23,1.817e-22,1.45e-21,3.528e-21,4.421e-21,4.614e-21,4.854e-20,5.378e-20,6.725e-19,5.288e-18,6.712e-18,1.015e-17,1.102e-17,1.105e-17,1.472e-17,1.867e-17,2.43e-17,3.063e-17,3.141e-17,5.38e-17,6.032e-17,6.217e-17,8.281e-17,9.62e-17,1.824e-16,2.018e-16,2.265e-16,2.384e-16,3.084e-16,3.095e-16,3.513e-16,3.194e-13,1.478e-12,5.989e-12,7.83e-12,8.295e-12,1.086e-11,2.11e-11,2.449e-11,4.197e-11,5.66e…	2L_22344525_SNP,2L_8463886_SNP,2L_9413637_SNP,2L_8487557_SNP,2R_14860049_SNP	2.242e-07,4.208e-07,7.346e-07,1.245e-06,1.258e-06
FBgn0023527	X	2156870	2158858	+	X_2158663_INS(cis),3R_5442275_SNP(trans-inter-arm)	X_2158663_INS,X_2158666_DEL,X_2158022_SNP	5.639e-09,5.639e-09,1.707e-08	X_2141697_SNP,X_2161117_SNP,X_2155809_SNP,X_2162632_INS	1.087e-08,2.182e-08,4.969e-08,5.327e-08	3R_5442275_SNP	6.347e-08
FBgn0023531	X	1567143	1586801	-	3L_11174115_SNP(trans-inter-arm)					3L_11174115_SNP	4.017e-09
FBgn0023536	X	381911	384758	+	3L_9068430_SNP(trans-inter-arm)					3L_9068430_SNP	5.62e-09
FBgn0023537	X	384820	387528	-	X_405290_SNP(trans-intra-arm),3L_3202755_SNP(trans-inter-arm)	X_385204_SNP,X_387227_SNP,X_387217_SNP,X_384321_SNP	4.421e-09,1.006e-08,1.138e-08,3.807e-08	X_405290_SNP,X_370917_SNP,X_405499_SNP,X_397381_SNP,X_382849_SNP,X_392158_SNP,X_378301_DEL,X_395621_SNP,X_392079_SNP,X_406765_SNP,X_382609_SNP,X_370950_SNP,X_394824_SNP,X_392106_SNP,X_394235_SNP,X_406775_SNP,X_396632_SNP,X_377574_SNP,X_389276_SNP,X_405023_SNP,X_365323_SNP,X_389268_DEL,X_405596_DEL,X_394918_SNP	1.046e-10,5.496e-10,1.144e-09,2.698e-09,2.969e-09,5.692e-09,6.977e-09,7.679e-09,9.51e-09,1.117e-08,1.311e-08,1.898e-08,2.225e-08,2.539e-08,2.707e-08,3.205e-08,3.27e-08,5.147e-08,1.077e-07,1.433e-07,1.439e-07,2.162e-07,4.791e-07,6.09e-07	3L_3202755_SNP	5.599e-07
FBgn0023541	X	2067448	2069348	-	X_2068790_SNP(cis),X_2067401_SNP(cis),3L_21250207_SNP(trans-inter-arm)	X_2068631_SNP,X_2069751_SNP,X_2069904_DEL,X_2068790_SNP,X_2069839_DEL,X_2069797_INS,X_2067401_SNP,X_2068079_SNP,X_2067315_SNP,X_2067301_SNP,X_2067357_SNP,X_2067410_SNP,X_2069775_SNP,X_2069364_SNP,X_2067298_SNP,X_2067341_SNP,X_2070124_SNP,X_2067200_SNP,X_2068833_SNP,X_2069245_SNP,X_2069387_SNP,X_2069512_SNP,X_2069598_SNP	6.796e-15,4.101e-14,6.241e-14,6.442e-14,6.544e-14,3.039e-13,5.256e-12,7.332e-12,2.002e-11,2.368e-11,2.823e-11,2.921e-11,6.618e-11,8.369e-10,1.055e-09,1.055e-09,8.522e-09,1.643e-08,2.183e-07,3.035e-07,9.549e-07,9.605e-07,1.659e-06	X_2087986_SNP,X_2064127_SNP,X_2061663_SNP,X_2073028_SNP,X_2075931_SNP,X_2058987_SNP,X_2060692_SNP,X_2073417_SNP,X_2083100_SNP,X_2089940_SNP,X_2087259_SNP,X_2063073_SNP,X_2092002_SNP,X_2060250_SNP,X_2059657_SNP,X_2092609_INS,X_2063057_SNP,X_2065232_SNP,X_2074363_SNP,X_2090019_SNP,X_2096734_SNP,X_2063251_SNP,X_2089120_SNP,X_2101291_SNP,X_2085184_SNP,X_2087816_SNP,X_2063267_SNP,X_2076328_SNP,X_20455…	1.099e-11,2.584e-11,4.129e-11,5.827e-11,6.342e-11,6.391e-11,8.145e-11,8.992e-11,9.397e-11,1.791e-10,3.017e-10,4.878e-10,5.475e-10,5.856e-10,6.634e-10,9.993e-10,1.085e-09,1.102e-09,1.237e-09,1.246e-09,1.393e-09,1.455e-09,1.819e-09,3.224e-09,5.9e-09,8.986e-09,1.206e-08,1.536e-08,1.738e-08,2.558e-08,2.668e-08,2.813e-08,3.002e-08,3.009e-08,3.248e-08,3.771e-08,4.486e-08,6.207e-08,6.472e-08,6.499e-08,7…	3L_21250207_SNP,3R_12944909_SNP,3R_12945384_INS,3R_12959432_SNP,3L_2917759_SNP	6.932e-07,1.489e-06,1.636e-06,2.192e-06,2.259e-06
FBgn0023545	X	1901944	1903397	-	2R_17622275_SNP(trans-inter-arm)					2R_17622275_SNP	2.072e-08
FBgn0023549	X	2083221	2099406	+	X_2100794_SNP(trans-intra-arm)			X_2100794_SNP,X_2067410_SNP,X_2097884_SNP,X_2089120_SNP,X_2068079_SNP,X_2089940_SNP,X_2090019_SNP	1.437e-10,6.333e-09,1.187e-08,4.894e-08,5.775e-08,6.011e-08,1.492e-07
FBgn0024150	3L	21129547	21165030	-	2L_10027727_SNP(trans-inter-arm)					2L_10027727_SNP,2L_10027717_SNP,2L_10027737_SNP,2L_10027736_SNP	1.27e-09,1.823e-09,6.603e-08,8.374e-08
FBgn0024273	3R	24650228	24657746	-	3R_24657672_SNP(cis)	3R_24657672_SNP,3R_24657681_SNP	3.915e-10,4.145e-09
FBgn0024277	3L	995982	1034875	-	3L_1033862_SNP(trans-intra-arm),2R_10573959_SNP(trans-inter-arm)			3L_1033862_SNP,3L_1033805_SNP,3L_1033751_SNP	2.377e-10,1.086e-09,1.85e-09	2R_10573959_SNP	3.485e-08
FBgn0024366	X	1223551	1235620	-	X_1235677_SNP(cis)	X_1235677_SNP,X_1235717_SNP	5.497e-11,2.958e-09	X_1231339_SNP,X_1228693_SNP,X_1228783_SNP,X_1243305_SNP,X_1227966_SNP	6.142e-11,1.215e-10,3.318e-10,1.051e-09,2.048e-09
FBgn0024728	4	684247	690510	+	3R_23032304_SNP(trans-inter-arm)					3R_23032304_SNP	1.666e-12
FBgn0024732	2R	7932117	7937677	+	2R_9084060_SNP(trans-intra-arm),2R_9090355_DEL(trans-intra-arm),2R_8672070_SNP(trans-intra-arm)			2R_9084060_SNP,2R_9330997_SNP,2R_7717409_SNP,2R_10618727_SNP,2R_9090355_DEL,2R_7968150_SNP,2R_8672070_SNP,2R_8778356_SNP,2R_8060973_SNP,2R_9458899_SNP,2R_9359383_SNP	6.616e-13,6.929e-12,1.812e-11,1.899e-11,2.078e-11,5.1e-11,5.311e-11,8.794e-11,8.92e-11,9.236e-11,1.824e-10
FBgn0024807	X	21495823	21501175	-	X_21498480_INS(trans-intra-arm),X_21538276_SNP(trans-intra-arm)	X_21495382_SNP,X_21496033_SNP,X_21495148_SNP,X_21495134_SNP,X_21495542_INS,X_21495570_SNP,X_21495559_SNP,X_21495332_SNP,X_21495207_SNP	2.037e-14,3.46e-14,3.703e-14,3.222e-12,3.789e-10,1.538e-09,1.483e-07,4.282e-07,1.249e-06	X_21498480_INS,X_21538276_SNP,X_21499329_SNP,X_21498443_SNP,X_21497999_SNP,X_21497954_INS,X_21497897_SNP,X_21527077_SNP,X_21498380_DEL,X_21498412_SNP,X_21499265_INS,X_21538264_SNP,X_21507786_SNP,X_21507785_SNP,X_21465868_SNP,X_21498409_SNP,X_21508017_SNP,X_21508077_SNP,X_21465858_SNP,X_21498527_SNP,X_21498678_SNP,X_21507926_SNP,X_21498689_SNP,X_21465899_SNP,X_21469661_SNP,X_21465783_SNP,X_2149868…	1.533e-18,1.38e-17,1.938e-17,2.09e-17,4.795e-17,1.387e-16,2.465e-16,3.033e-16,1.421e-15,1.819e-15,2.142e-14,3.359e-14,3.837e-14,6.949e-14,8.105e-14,1.162e-13,1.23e-13,1.319e-13,1.648e-13,1.76e-13,2.24e-13,2.268e-13,3.029e-13,3.202e-13,3.574e-13,5.343e-13,7.753e-13,9.518e-13,1.11e-12,1.116e-12,1.801e-12,3.137e-12,4.65e-12,4.712e-12,4.876e-12,6.553e-12,1.263e-11,2.004e-10,6.73e-10,6.763e-10,7.759e-…	3R_20830619_SNP,3R_20830598_SNP,3R_20830615_SNP	4.715e-07,1.089e-06,2.269e-06
FBgn0024841	3R	25548885	25549948	+	3R_25549103_SNP(cis)	3R_25549103_SNP,3R_25550463_SNP	3.207e-08,5.074e-08
FBgn0024995	X	2600184	2601460	-	X_2601436_SNP(cis)	X_2601436_SNP	1.248e-08
FBgn0024998	X	2605789	2607993	-	X_2607394_SNP(cis)	X_2607238_SNP,X_2607394_SNP,X_2607359_SNP,X_2607321_SNP,X_2607307_SNP,X_2607964_SNP,X_2607250_SNP,X_2607172_SNP	7.685e-11,1.066e-10,3.178e-10,3.947e-10,9.552e-09,2.823e-08,6.048e-08,6.953e-08
FBgn0025286	2R	5474698	5475494	+	2R_5474501_SNP(cis)	2R_5475426_SNP,2R_5474501_SNP,2R_5476198_SNP,2R_5474940_SNP,2R_5475597_SNP,2R_5475586_SNP,2R_5475926_SNP,2R_5474427_SNP,2R_5475104_SNP,2R_5474488_SNP,2R_5474546_SNP,2R_5474542_INS,2R_5473814_SNP	9.283e-25,7.71e-22,7.71e-22,9.573e-16,2.321e-13,3.908e-13,7.895e-13,1.519e-10,7.953e-09,8.663e-09,1.329e-08,3.599e-08,7.31e-08	2R_5476712_SNP,2R_5476715_SNP,2R_5476590_SNP,2R_5458196_SNP,2R_5477892_INS,2R_5464894_SNP,2R_5445157_SNP,2R_5489526_SNP,2R_5453944_DEL,2R_5445981_SNP,2R_5464929_SNP,2R_5464856_SNP,2R_5464869_SNP,2R_5470784_SNP,2R_5471927_SNP,2R_5456711_SNP,2R_5463217_SNP,2R_5482308_SNP,2R_5472957_SNP,2R_5459384_SNP,2R_5453703_SNP,2R_5450481_SNP,2R_5453493_SNP,2R_5452422_DEL,2R_5464552_SNP,2R_5487125_SNP,2R_548714…	7.71e-22,7.71e-22,8.56e-21,8.661e-20,6.554e-19,8.774e-19,2.232e-17,2.454e-17,6.037e-17,9.108e-17,1.489e-16,1.944e-16,2.344e-16,3.319e-16,5.957e-16,6.064e-16,7.035e-16,7.547e-16,7.784e-16,8.723e-16,1.261e-15,1.494e-15,2.229e-14,3.269e-14,2.831e-13,3.605e-13,4.447e-13,5.317e-13,1.429e-12,2.32e-12,2.428e-12,5.29e-12,3.699e-11,4.267e-11,4.301e-11,1.417e-10,1.64e-10,2.368e-10,4.035e-10,8.738e-10,1.026…	X_20022929_INS	6.402e-09
FBgn0025454	2R	8073172	8075936	+	2R_8072916_SNP(cis),2R_8075284_SNP(cis)	2R_8075323_SNP,2R_8076397_SNP,2R_8075284_SNP,2R_8072884_INS,2R_8072916_SNP	5.802e-28,3.023e-26,1.478e-24,9.259e-22,5.153e-20	2R_8051603_SNP,2R_8049979_SNP,2R_8050589_SNP,2R_8052802_SNP,2R_8070658_SNP,2R_8060142_SNP,2R_8060123_SNP,2R_8068113_SNP,2R_8068499_SNP,2R_8061931_SNP,2R_8067842_SNP,2R_8067090_SNP,2R_8026331_SNP,2R_8060092_SNP,2R_8061873_SNP,2R_8062180_SNP,2R_8024102_SNP,2R_8031335_SNP,2R_8021436_SNP,2R_8062950_SNP,2R_8059620_DEL,2R_8024331_SNP,2R_8063730_SNP,2R_8062000_SNP,2R_8059905_SNP,2R_8063706_SNP,2R_802110…	4.837e-25,5.934e-25,6.676e-25,1.085e-24,3.09e-18,6.259e-18,8.635e-18,1.306e-17,5.359e-16,1.151e-14,1.682e-14,1.971e-14,2.981e-14,3.631e-14,4.555e-14,8.174e-14,3.592e-13,5.236e-13,8.411e-13,1.837e-12,2.338e-12,2.533e-12,4.164e-12,4.274e-12,4.731e-12,8.113e-12,1.383e-11,2.52e-11,2.726e-11,3.768e-11,4.182e-11,4.561e-11,5.151e-11,5.151e-11,5.45e-11,7.282e-11,1.238e-10,1.479e-10,1.556e-10,1.7e-10,1.99…
FBgn0025457	3R	25499729	25501143	-	3R_25501048_SNP(cis)	3R_25500983_SNP,3R_25501048_SNP,3R_25501035_SNP,3R_25501061_SNP	1.517e-10,2.493e-10,3.669e-10,4.812e-08	3R_25502470_SNP,3R_25502524_SNP,3R_25502558_SNP	1.155e-08,2.891e-08,9.042e-08
FBgn0025620	X	681888	684122	-	X_699194_SNP(trans-intra-arm),X_705297_SNP(trans-intra-arm),X_2082842_SNP(trans-intra-arm)	X_685067_SNP,X_684156_SNP,X_681225_SNP,X_681308_SNP,X_681351_SNP,X_681316_SNP	6.348e-16,2.945e-14,3.71e-07,3.99e-07,4.621e-07,8.043e-07	X_699194_SNP,X_697463_SNP,X_699219_SNP,X_696293_SNP,X_680213_SNP,X_689034_SNP,X_698055_DEL,X_698059_SNP,X_686327_INS,X_686927_SNP,X_702527_SNP,X_703613_DEL,X_698052_SNP,X_683100_SNP,X_698894_SNP,X_705583_DEL,X_693795_SNP,X_693062_SNP,X_685473_SNP,X_678846_SNP,X_695057_SNP,X_698333_SNP,X_686056_SNP,X_686455_SNP,X_686122_SNP,X_698585_SNP,X_687972_SNP,X_686060_SNP,X_688868_SNP,X_713948_SNP,X_712696_…	4.961e-16,5.829e-16,7.131e-16,7.351e-16,8.218e-16,8.218e-16,8.218e-16,8.218e-16,2.678e-15,3.933e-15,5.091e-15,6.505e-15,7.065e-15,7.436e-15,1.316e-14,7.251e-14,7.883e-14,1.093e-13,2.074e-13,3.07e-13,3.515e-13,4.551e-13,6.919e-13,7.528e-13,9.074e-13,1.062e-12,1.079e-12,3.254e-12,7.497e-12,2.194e-11,2.225e-11,5.454e-11,8.797e-11,4.491e-10,1.271e-09,1.368e-09,1.936e-09,2.227e-09,2.355e-09,3.227e-09,…
FBgn0025621	X	687180	691094	+	X_679471_SNP(trans-intra-arm),2L_14784327_SNP(trans-inter-arm)	X_687375_SNP,X_686528_SNP,X_686930_SNP,X_687533_SNP,X_686477_SNP,X_687209_SNP,X_688019_SNP,X_691101_SNP,X_686482_SNP,X_690308_SNP,X_686495_INS,X_690569_SNP,X_687247_SNP,X_691945_SNP,X_690746_SNP,X_686327_INS,X_687972_SNP,X_686455_SNP,X_690759_DEL,X_686927_SNP,X_686669_SNP,X_687573_SNP	5.092e-10,1.036e-09,1.195e-09,1.278e-09,1.371e-09,2.506e-09,2.836e-09,2.983e-09,3.275e-09,3.47e-09,5.116e-09,2.166e-08,2.558e-08,3.601e-08,1.222e-07,2.366e-07,3.671e-07,1.231e-06,1.601e-06,3.198e-06,5.624e-06,5.915e-06	X_679471_SNP,X_679456_SNP,X_684614_SNP,X_689273_SNP,X_688289_SNP,X_678645_SNP,X_689949_SNP,X_682354_SNP,X_698775_SNP,X_683856_SNP,X_669468_SNP,X_669339_SNP,X_675975_SNP,X_669723_SNP,X_689971_SNP,X_699301_SNP,X_684796_SNP,X_684805_SNP,X_700928_SNP,X_688265_SNP,X_685383_SNP,X_674863_SNP,X_701137_SNP,X_681877_SNP,X_677349_SNP,X_677347_SNP,X_685292_INS,X_684843_DEL,X_675856_SNP,X_695818_SNP,X_700352_…	2.893e-11,5.016e-11,1.007e-10,1.475e-10,7.135e-10,1.08e-09,1.398e-09,1.495e-09,1.985e-09,1.988e-09,2.336e-09,2.81e-09,3.08e-09,3.192e-09,3.237e-09,3.49e-09,4.213e-09,4.505e-09,4.775e-09,5.163e-09,5.281e-09,6.204e-09,6.334e-09,6.469e-09,6.542e-09,7.02e-09,7.237e-09,7.587e-09,8.053e-09,8.458e-09,8.699e-09,9e-09,9.093e-09,9.114e-09,9.307e-09,9.393e-09,1.01e-08,1.018e-08,1.101e-08,1.119e-08,1.128e-08…	2L_14784327_SNP,3R_11893666_SNP	4.73e-06,6.176e-06
FBgn0025628	X	1960468	1967516	-	X_1965880_SNP(trans-intra-arm)	X_1967353_SNP,X_1967564_SNP,X_1966735_SNP,X_1966723_SNP,X_1959857_SNP,X_1959771_SNP,X_1960167_SNP,X_1959996_SNP,X_1960011_SNP,X_1960169_SNP	1.186e-19,1.689e-19,3.837e-14,4.724e-14,5.607e-14,1.037e-11,4.081e-11,5.374e-11,1.99e-10,6.34e-10	X_1965880_SNP,X_1964945_SNP,X_1969520_SNP,X_1977206_SNP,X_1974513_SNP,X_1974782_SNP,X_1964035_SNP,X_1978262_SNP,X_1976446_SNP,X_1974537_SNP,X_1975423_SNP,X_1964049_INS,X_1970043_SNP,X_1972867_SNP,X_1964664_SNP,X_1979606_SNP,X_1972861_SNP,X_1974756_DEL,X_1981636_SNP,X_1955944_SNP,X_1974943_SNP,X_1981034_SNP,X_1964608_SNP,X_1970918_DEL,X_1956285_SNP,X_1965848_SNP,X_1974683_DEL,X_1982987_SNP,X_19556…	1.439e-22,1.553e-22,7.511e-21,8.991e-21,8.933e-20,9.883e-20,1.751e-19,2.419e-19,3.498e-19,6.936e-19,7.753e-19,8.912e-19,1.031e-18,1.157e-18,1.213e-18,2.097e-18,5.533e-18,1.59e-17,6.452e-17,1.691e-16,1.979e-16,3.033e-16,4.897e-16,7.394e-16,9.138e-16,1.786e-15,2.326e-15,9.344e-14,1.138e-13,1.147e-13,1.438e-13,3.686e-13,3.836e-13,5.431e-13,5.961e-13,1.976e-12,2.304e-12,3.355e-12,4.145e-12,4.162e-12,…	3R_3410082_SNP,3R_3410081_SNP,2R_18557722_SNP,3R_3373456_SNP,3R_3363083_SNP,2R_10954863_SNP,2R_13131393_SNP,3R_3410617_SNP,3L_3539045_SNP	3.066e-08,3.283e-08,1.949e-07,2.395e-07,2.671e-07,2.696e-07,2.733e-07,3.266e-07,3.868e-07
FBgn0025630	X	1966446	1968923	+	X_1970788_SNP(trans-intra-arm),X_1967289_SNP(cis)	X_1968037_SNP,X_1966212_SNP,X_1965894_SNP,X_1969139_SNP,X_1969152_SNP,X_1968640_SNP,X_1967323_SNP,X_1967241_SNP,X_1967289_SNP,X_1967242_SNP,X_1966057_SNP,X_1967194_SNP,X_1968192_SNP,X_1967265_SNP,X_1967268_SNP,X_1968446_SNP,X_1966439_SNP,X_1966345_SNP,X_1966456_DEL,X_1966534_SNP,X_1966535_SNP,X_1969520_SNP,X_1967932_SNP,X_1966613_SNP,X_1967353_SNP,X_1965880_SNP,X_1965848_SNP	1.32e-26,1.555e-20,3.83e-19,2.54e-16,3.294e-16,9.613e-16,2.557e-15,3.81e-15,3.828e-15,3.953e-15,4.374e-15,5.384e-15,8.914e-15,9.906e-15,1.234e-14,8.67e-14,1.804e-10,1.095e-09,1.169e-09,1.092e-08,5.636e-08,1.869e-07,3.573e-07,1.112e-06,1.196e-06,1.473e-06,1.534e-06	X_1971109_SNP,X_1972008_SNP,X_1970554_SNP,X_1970366_SNP,X_1970364_SNP,X_1970788_SNP,X_1970678_SNP,X_1972114_SNP,X_1970357_DEL,X_1967723_SNP,X_1965295_SNP,X_1967739_SNP,X_1972284_DEL,X_1967725_SNP,X_1971436_SNP,X_1972323_SNP,X_1967685_SNP,X_1970014_INS,X_1972123_DEL,X_1972600_SNP,X_1972570_SNP,X_1972138_INS,X_1977032_SNP,X_1977335_SNP,X_1977323_INS,X_1977371_SNP,X_1977392_SNP,X_1976741_SNP,X_19767…	2.332e-29,5.592e-28,5.635e-28,6.713e-28,9.784e-28,1.618e-27,2.276e-27,2.451e-27,3.623e-27,7.516e-27,7.917e-27,8.569e-27,3.756e-26,6.677e-26,7.791e-26,9.625e-26,3.512e-25,4.556e-25,2.286e-24,2.399e-24,1.987e-23,2.036e-23,5.465e-23,1.565e-22,1.169e-21,1.556e-21,3.448e-21,4.911e-21,6.595e-21,1.077e-20,1.746e-20,2.196e-20,2.22e-20,4.291e-20,1.604e-19,1.928e-19,1.992e-19,2.794e-19,2.752e-18,2.81e-18,3…	2L_16622940_SNP,3R_10363636_SNP,3L_13670668_SNP,3L_13670683_DEL	9.006e-07,1.083e-06,2.424e-06,2.788e-06
FBgn0025632	X	1935901	1949447	+	X_1947402_SNP(trans-intra-arm)	X_1949106_SNP,X_1948507_SNP	2.886e-11,1.852e-09	X_1947402_SNP,X_1951815_SNP,X_1952525_SNP,X_1955500_SNP,X_1958445_SNP,X_1958482_SNP,X_1940377_SNP,X_1951033_SNP,X_1922661_SNP,X_1940479_SNP	9.75e-13,3.402e-11,4.083e-10,4.15e-10,1.236e-09,1.874e-09,3.345e-08,7.736e-08,1.067e-07,1.221e-07
FBgn0025637	X	550147	551932	+	X_3022067_SNP(trans-intra-arm)			X_3022067_SNP	4.091e-09
FBgn0025639	X	542516	550066	-	X_524380_SNP(trans-intra-arm),X_1128347_SNP(trans-intra-arm),X_541595_SNP(cis)	X_550818_SNP,X_550981_SNP,X_541595_SNP,X_542051_SNP	2.531e-11,1.682e-10,1.754e-10,5.903e-10	X_524380_SNP,X_524112_SNP,X_534829_SNP,X_537802_SNP,X_547803_SNP,X_565306_SNP,X_522066_SNP,X_553390_SNP,X_565322_SNP,X_565328_SNP,X_508930_SNP,X_559684_SNP,X_548485_SNP,X_562649_SNP,X_561201_SNP,X_563994_SNP,X_567976_SNP,X_561200_SNP,X_567916_SNP,X_565316_SNP,X_566491_SNP,X_552375_SNP,X_559896_SNP,X_532951_SNP,X_565315_SNP,X_561207_SNP,X_557825_SNP,X_556541_SNP,X_566060_SNP,X_557856_DEL,X_557872_…	2.688e-15,5.63e-15,4.762e-14,8.564e-14,2.937e-13,5.962e-13,3.816e-12,8.549e-12,1.203e-11,1.203e-11,1.22e-11,1.401e-11,1.439e-11,1.878e-11,2.2e-11,2.325e-11,2.392e-11,2.582e-11,2.761e-11,2.874e-11,3.416e-11,4.075e-11,6.237e-11,6.261e-11,6.345e-11,6.533e-11,6.793e-11,9.239e-11,9.509e-11,1.054e-10,1.127e-10,2.061e-10,2.421e-10,2.666e-10,2.862e-10,3.081e-10,3.525e-10,3.921e-10,5.348e-10,6.365e-10,6.6…	2L_20494933_SNP,2L_20494911_SNP,2L_20494952_SNP,2L_20494910_SNP,2R_4942540_SNP,3R_21506586_SNP,2L_8958670_DEL,2L_8958635_SNP	1.263e-07,1.287e-07,1.453e-07,2.822e-07,4.09e-07,1.683e-06,1.759e-06,2.82e-06
FBgn0025682	3L	1298672	1300389	+	3L_1300108_SNP(cis),2R_15765875_SNP(trans-inter-arm)	3L_1300108_SNP,3L_1299848_SNP,3L_1300127_SNP,3L_1300635_SNP,3L_1300670_DEL,3L_1300873_SNP,3L_1300610_SNP,3L_1298422_SNP,3L_1298368_SNP,3L_1300591_SNP,3L_1300825_SNP,3L_1300429_SNP,3L_1300423_SNP,3L_1300252_SNP,3L_1298162_SNP,3L_1297752_SNP,3L_1300257_SNP	2.328e-27,3.179e-20,4.015e-19,3.692e-13,2.154e-12,3.748e-12,2.305e-10,2.686e-10,3.238e-10,5.136e-10,5.002e-09,2.061e-08,2.375e-08,1.848e-07,1.901e-07,5.346e-07,7.68e-07	3L_1294369_SNP,3L_1310490_DEL,3L_1294372_DEL,3L_1294370_SNP,3L_1294494_SNP,3L_1304911_DEL,3L_1306434_SNP,3L_1294540_SNP,3L_1305202_SNP,3L_1305227_SNP,3L_1304950_SNP,3L_1295763_SNP,3L_1301756_SNP,3L_1301659_SNP,3L_1295781_SNP,3L_1305168_SNP,3L_1295690_SNP,3L_1303325_SNP,3L_1318514_SNP,3L_1322730_SNP,3L_1301663_SNP,3L_1294378_INS,3L_1304968_SNP,3L_1305454_SNP,3L_1294270_SNP,3L_1294249_SNP,3L_131034…	3.979e-18,2.48e-15,6.537e-15,1.062e-14,6.669e-14,1.633e-13,6.456e-13,7.309e-13,8.475e-13,1.27e-12,1.626e-12,1.74e-12,3.109e-12,3.278e-12,3.938e-12,6.77e-12,8.07e-12,2.778e-11,3.177e-11,3.195e-11,3.379e-11,4.094e-11,6.261e-11,8.645e-11,1.286e-10,2.286e-10,2.537e-10,3.264e-10,3.331e-10,3.903e-10,4.234e-10,7.158e-10,7.425e-10,7.803e-10,8.709e-10,9.71e-10,1.049e-09,1.052e-09,1.166e-09,1.542e-09,1.722…	2R_5974461_SNP,2R_5974475_SNP,2R_15765875_SNP,2R_5954933_SNP	6.309e-07,9.225e-07,1.196e-06,2.805e-06
FBgn0025833	2R	12762229	12783157	-	2R_12763205_SNP(cis)	2R_12763205_SNP,2R_12763129_SNP,2R_12762466_SNP	9.961e-39,1.284e-08,3.486e-08	2R_12763957_SNP,2R_12763649_SNP,2R_12763296_SNP,2R_12764303_SNP,2R_12764370_SNP,2R_12763980_SNP,2R_12777301_SNP	4.682e-11,4.305e-10,1.327e-09,1.532e-09,8.821e-09,2.694e-08,3.226e-08
FBgn0025865	3R	16887402	16890193	-	3R_16890781_SNP(cis)	3R_16890781_SNP	1.32e-08
FBgn0025866	3L	9881862	9886419	+	X_4679337_SNP(trans-inter-arm)					X_4679337_SNP	1.721e-15
FBgn0025878	2R	18267142	18270180	+	2R_18267632_SNP(cis),2R_14087638_SNP(trans-intra-arm)	2R_18267632_SNP	3.267e-13	2R_18268667_SNP,2R_14087638_SNP	1.473e-08,1.776e-08
FBgn0026192	X	17597385	17601129	+	2R_17622275_SNP(trans-inter-arm)					2R_17622275_SNP	1.918e-08
FBgn0026239	3R	14809747	14848158	+	3R_14804719_SNP(trans-intra-arm)			3R_14804719_SNP	2.386e-10
FBgn0026250	3R	14100387	14108727	+	3R_14107681_SNP(trans-intra-arm),3R_14101384_SNP(cis)	3R_14107791_INS,3R_14100960_INS,3R_14100915_SNP,3R_14101384_SNP,3R_14108177_SNP,3R_14100449_SNP,3R_14108625_SNP,3R_14099829_SNP,3R_14099865_SNP,3R_14099939_SNP,3R_14107751_SNP,3R_14108211_SNP,3R_14099889_SNP,3R_14107820_SNP	1.641e-11,2.594e-10,2.595e-10,2.818e-10,9.962e-10,3.263e-09,3.533e-09,6.253e-09,6.253e-09,6.253e-09,6.57e-08,4.188e-07,8.465e-07,1.889e-06	3R_14107681_SNP,3R_14098608_SNP,3R_14101713_SNP,3R_14094803_SNP,3R_14107631_SNP,3R_14103965_SNP,3R_14096517_SNP,3R_14097818_SNP,3R_14105999_SNP,3R_14094907_SNP,3R_14094735_DEL,3R_14094869_MNP,3R_14094873_SNP,3R_14094883_INS,3R_14094888_INS,3R_14094892_SNP,3R_14094897_SNP,3R_14094901_SNP,3R_14105461_SNP,3R_14094936_SNP,3R_14096907_SNP,3R_14104474_SNP,3R_14088601_SNP,3R_14092066_SNP,3R_14111397_SNP…	4.683e-14,1.354e-11,5.436e-11,1.402e-10,4.102e-10,7.214e-10,7.844e-10,2.842e-09,3.354e-09,1.098e-08,1.198e-08,1.198e-08,1.198e-08,1.198e-08,1.198e-08,1.198e-08,1.198e-08,1.198e-08,1.238e-08,1.283e-08,3.15e-08,3.547e-08,3.617e-08,3.781e-08,5.17e-08,8.649e-08,9.087e-08,9.297e-08,1.082e-07,1.272e-07,1.362e-07,1.389e-07,2.06e-07,2.117e-07,2.539e-07,2.904e-07,5.458e-07,6.565e-07,7.108e-07,8.323e-07,1.…	X_5716514_SNP	1.528e-06
FBgn0026268	X	11062063	11063091	-	X_11060152_SNP(trans-intra-arm)			X_11060152_SNP,X_11060607_SNP	7.521e-31,2.339e-15
FBgn0026317	3R	19956029	19960376	+	3R_19959610_SNP(cis)	3R_19959610_SNP,3R_19960052_SNP,3R_19959622_SNP,3R_19960345_SNP,3R_19959856_SNP,3R_19959655_SNP	4.811e-13,9.142e-13,1.119e-12,1.271e-10,2.51e-10,8.638e-09
FBgn0026319	2L	4361925	4380716	+	2L_4379373_SNP(trans-intra-arm)			2L_4379373_SNP,2L_4379340_SNP,2L_4379307_SNP	4.556e-09,7.229e-09,8.647e-09
FBgn0026361	2R	3847638	3849426	-	2R_3841165_SNP(trans-intra-arm),2R_3844869_SNP(trans-intra-arm),2R_3843574_SNP(trans-intra-arm)	2R_3846667_SNP,2R_3846835_SNP,2R_3846817_INS	1.181e-25,2.491e-13,6.613e-12	2R_3841165_SNP,2R_3844869_SNP,2R_3843640_SNP,2R_3843574_SNP,2R_3853216_SNP,2R_3843643_DEL,2R_3865434_SNP,2R_3840710_SNP,2R_3843162_DEL,2R_3876211_DEL,2R_3840708_INS,2R_3845584_SNP,2R_3869306_SNP,2R_3844094_SNP,2R_3842876_SNP,2R_3881420_SNP,2R_3841201_SNP,2R_3841066_SNP,2R_3857024_SNP,2R_3880418_SNP,2R_3868422_SNP,2R_3853951_SNP	1.694e-31,2.755e-30,4.502e-30,8.847e-30,2.001e-27,1.516e-26,1.038e-23,8.923e-23,1.696e-21,1.784e-21,1.104e-20,3.899e-20,8.373e-19,2.189e-17,5.23e-17,2.303e-15,6.976e-14,9.871e-14,1.005e-13,6.322e-13,1.94e-12,9.348e-11
FBgn0026372	3L	1667192	1668654	-	3L_1667917_SNP(cis),3L_1666883_SNP(cis),3L_1664904_SNP(trans-intra-arm)	3L_1667914_SNP,3L_1666516_SNP,3L_1667917_SNP,3L_1667773_SNP,3L_1666520_SNP,3L_1667099_MNP,3L_1667670_SNP,3L_1666883_SNP,3L_1666958_SNP	6.398e-20,1.012e-14,1.33e-14,7.345e-13,4.586e-10,9.895e-10,1.231e-08,1.325e-08,1.529e-08	3L_1664904_SNP,3L_1665424_SNP,3L_1665463_SNP,3L_1670718_SNP,3L_1670709_SNP,3L_1670734_SNP,3L_1665694_SNP,3L_1665328_SNP,3L_1665323_SNP,3L_1664937_SNP,3L_1665547_SNP,3L_1664935_SNP	1.416e-11,1.588e-10,2.909e-10,5.54e-10,1.302e-09,1.784e-09,1.8e-09,4.665e-09,1.755e-08,1.861e-08,6.681e-08,1.074e-07
FBgn0026404	3L	9961579	9964102	+	3L_9962948_SNP(trans-intra-arm)			3L_9962948_SNP	4.04e-08
FBgn0026439	2L	9333567	9341925	+	2L_16386257_DEL(trans-intra-arm)			2L_16386257_DEL	1.193e-09
FBgn0026441	3R	11146478	11151001	+	3L_18576340_SNP(trans-inter-arm)					3L_18576340_SNP	2.042e-08
FBgn0026566	3R	2481752	2483504	-	3R_2327225_SNP(trans-intra-arm),3R_13180102_SNP(trans-intra-arm),2L_10893894_SNP(trans-inter-arm)	3R_2483122_SNP,3R_2480866_SNP	5.016e-09,3.689e-07	3R_2327225_SNP,3R_2490215_SNP,3R_2313029_SNP,3R_2472827_SNP,3R_2560994_SNP,3R_2360633_SNP,3R_2490407_SNP,3R_2458757_SNP,3R_2490408_SNP,3R_2571645_SNP,3R_2532037_SNP,3R_2434555_SNP,3R_2438271_SNP,3R_2318355_SNP,3R_2323302_SNP,3R_2554732_SNP,3R_2417195_SNP,3R_2529429_SNP,3R_2373785_SNP,3R_2432272_SNP,3R_2365115_INS,3R_2556425_SNP,3R_2414552_SNP,3R_2451366_SNP,3R_2389181_SNP,3R_2423140_SNP,3R_244981…	8.892e-11,4.701e-10,1.374e-09,2.116e-09,3.54e-09,6.348e-09,1.138e-08,1.149e-08,1.285e-08,1.452e-08,1.739e-08,2.347e-08,2.397e-08,2.969e-08,2.969e-08,2.981e-08,3.202e-08,3.655e-08,3.782e-08,3.835e-08,3.837e-08,3.904e-08,4.058e-08,4.228e-08,4.261e-08,4.261e-08,4.261e-08,4.261e-08,4.261e-08,4.271e-08,4.271e-08,4.274e-08,4.32e-08,4.364e-08,4.438e-08,4.536e-08,4.824e-08,4.977e-08,5.053e-08,5.136e-08,5…	X_10488988_SNP,X_9316531_SNP,2L_10893894_SNP,3L_3669552_SNP	5.381e-09,6.735e-07,1.026e-06,1.564e-06
FBgn0026570	3L	2169553	2170971	-	3L_2171188_SNP(cis),3L_2169107_SNP(cis)	3L_2171188_SNP,3L_2171469_SNP,3L_2169107_SNP,3L_2169700_SNP,3L_2169299_SNP,3L_2169366_SNP,3L_2171534_SNP,3L_2169654_SNP,3L_2171809_SNP,3L_2169966_SNP,3L_2169230_SNP,3L_2169447_SNP,3L_2170869_SNP,3L_2170645_SNP,3L_2168826_SNP,3L_2170627_SNP,3L_2170335_SNP,3L_2170408_SNP,3L_2169374_SNP,3L_2170372_SNP,3L_2171150_SNP,3L_2169778_SNP,3L_2171156_SNP,3L_2170369_SNP,3L_2169186_SNP,3L_2171076_SNP,3L_217092…	1.327e-21,4.54e-15,4.437e-13,6.597e-13,8.738e-13,9.29e-13,1.535e-12,1.622e-12,2.56e-12,5.194e-12,5.613e-12,7.556e-12,1.354e-11,2.036e-11,1.117e-10,2.879e-10,3.246e-10,4.261e-10,9.974e-10,1.313e-09,1.751e-09,2.839e-09,3.544e-09,8.374e-09,4.879e-08,4.914e-08,9.938e-07	3L_2172366_SNP,3L_2173244_SNP,3L_2172190_SNP,3L_2175314_SNP,3L_2172388_SNP,3L_2175974_SNP,3L_2175966_SNP,3L_2173307_SNP,3L_2178916_SNP,3L_2167916_SNP,3L_2175332_SNP,3L_2175987_SNP,3L_2176716_SNP,3L_2177424_SNP,3L_2178939_SNP,3L_2181055_SNP,3L_2174155_SNP,3L_2178150_SNP,3L_2175990_INS,3L_2179645_SNP,3L_2174120_SNP,3L_2174113_DEL,3L_2176866_SNP,3L_2174244_SNP,3L_2173373_SNP,3L_2175956_SNP,3L_217888…	5.835e-13,7.531e-13,2.324e-12,5.575e-12,7.264e-12,3.554e-11,3.566e-11,5.234e-11,8.382e-11,1.383e-10,2.5e-10,2.653e-10,2.806e-10,4.271e-10,6.4e-10,6.604e-10,7.875e-10,1.356e-09,2.045e-09,2.27e-09,2.489e-09,2.822e-09,4.24e-09,4.93e-09,6.165e-09,8.62e-09,1.203e-08,1.23e-08,1.962e-08,1.965e-08,2.581e-08,3.393e-08,3.423e-08,4.741e-08,5.448e-08,5.956e-08,8.44e-08,1.083e-07,1.297e-07,1.444e-07,1.825e-07…	3R_13438350_SNP,3R_13438349_SNP,3R_6923526_SNP	1.51e-06,1.554e-06,1.565e-06
FBgn0026597	3R	25848564	25861033	+	3R_25848688_SNP(cis)	3R_25848688_SNP	1.435e-09
FBgn0026602	2R	3130529	3133281	-	2R_3175281_SNP(trans-intra-arm),2R_3134238_SNP(cis),3R_7542945_SNP(trans-inter-arm)	2R_3134238_SNP	2.144e-08	2R_3175281_SNP,2R_3171445_SNP,2R_3173005_SNP,2R_3175099_SNP,2R_3171848_SNP,2R_3173866_INS,2R_3131708_SNP,2R_3183927_SNP,2R_3114337_SNP,2R_3135393_SNP,2R_3129115_SNP,2R_3196203_SNP,2R_3196117_SNP,2R_3061745_DEL,2R_3129216_SNP,2R_3072434_SNP,2R_3148890_SNP,2R_3143134_SNP,2R_3075680_SNP,2R_3114333_DEL,2R_3168782_SNP,2R_3187833_SNP,2R_3170610_SNP,2R_3223787_SNP,2R_3138657_SNP,2R_3143137_DEL,2R_313545…	7.83e-14,1.709e-13,9.372e-13,2.773e-12,3.906e-12,3.963e-12,7.295e-12,1.763e-11,1.088e-10,1.318e-10,1.509e-10,1.548e-10,2.225e-10,2.743e-10,3.76e-10,5.392e-10,5.861e-10,1.48e-09,1.569e-09,1.604e-09,1.651e-09,1.905e-09,2.389e-09,2.845e-09,3.322e-09,3.744e-09,3.969e-09,4.5e-09,6.06e-09,1.283e-08,1.312e-08,1.724e-08,1.992e-08,2.157e-08,2.503e-08,2.553e-08,2.758e-08,3.609e-08,4.328e-08,4.455e-08,5.621…	2L_19910247_SNP,2L_19898680_SNP,3L_2987461_SNP,3R_7542945_SNP,3L_2976222_SNP	6.886e-08,1.098e-07,1.101e-06,2.752e-06,2.982e-06
FBgn0026619	2R	8640531	8643919	-	2R_8641595_SNP(trans-intra-arm),3L_9453080_SNP(trans-inter-arm),2R_8646521_SNP(trans-intra-arm)	2R_8643143_SNP	2.137e-09	2R_8641592_SNP,2R_8641595_SNP,2R_8641561_SNP,2R_8649182_SNP,2R_8646483_SNP,2R_8646492_SNP,2R_8649343_SNP,2R_8649346_SNP,2R_8649363_SNP,2R_8649335_SNP,2R_8641929_SNP,2R_8641796_SNP,2R_8649185_SNP,2R_8649196_SNP,2R_8642145_SNP,2R_8642359_SNP,2R_8646521_SNP,2R_8641835_SNP,2R_8908091_SNP	3.527e-12,6.164e-12,9.241e-10,2.366e-08,3.348e-08,3.348e-08,4.136e-08,4.136e-08,4.136e-08,4.342e-08,4.859e-08,7.694e-08,8.499e-08,8.931e-08,1.045e-07,2.022e-07,2.149e-07,2.281e-07,2.653e-07	3L_9453080_SNP	7.631e-08
FBgn0026718	2L	8449691	8463994	-	2L_8463660_SNP(cis),2L_8466447_SNP(trans-intra-arm)	2L_8463660_SNP,2L_8464367_SNP,2L_8464195_SNP,2L_8464010_SNP,2L_8464258_SNP,2L_8464302_SNP,2L_8464117_SNP,2L_8464084_SNP,2L_8462995_SNP,2L_8464091_SNP,2L_8464079_SNP,2L_8464118_SNP,2L_8449462_SNP,2L_8464353_INS,2L_8464083_SNP,2L_8464312_SNP,2L_8463253_SNP,2L_8463282_MNP,2L_8464074_SNP,2L_8464107_SNP,2L_8463256_SNP,2L_8449091_SNP,2L_8463214_SNP,2L_8449474_SNP,2L_8464624_SNP,2L_8463027_SNP,2L_846314…	3.319e-21,2.28e-14,7.711e-14,3.414e-13,1.613e-12,2.566e-12,2.937e-12,3.165e-12,3.973e-12,5.502e-12,7.261e-12,1.001e-11,1.03e-11,1.063e-11,1.506e-11,2.558e-11,3.187e-11,4.202e-11,4.487e-11,5.939e-11,7.571e-11,9.27e-11,1.007e-10,2.253e-10,2.315e-10,6.326e-10,8.349e-10,9.385e-10,3.615e-09,1.157e-08,2.188e-08,2.598e-08,6.654e-08,9.081e-08,1.676e-07,1.188e-06,1.38e-06,2.07e-06,2.537e-06,2.752e-06	2L_8451281_SNP,2L_8468631_SNP,2L_8466449_SNP,2L_8467679_SNP,2L_8462149_SNP,2L_8462072_SNP,2L_8461685_SNP,2L_8467635_SNP,2L_8467964_SNP,2L_8467172_SNP,2L_8466378_SNP,2L_8462458_SNP,2L_8467159_SNP,2L_8466758_SNP,2L_8462234_SNP,2L_8466447_SNP,2L_8467296_SNP,2L_8467013_DEL,2L_8462127_SNP,2L_8461865_SNP,2L_8461597_SNP,2L_8452374_SNP,2L_8451304_SNP,2L_8446413_SNP,2L_8445965_SNP,2L_8445750_SNP,2L_846178…	1.253e-13,1.603e-13,3.178e-13,3.942e-13,2.433e-12,2.868e-12,3.033e-12,3.612e-12,5.948e-12,8.43e-12,9.572e-12,1.067e-11,1.84e-11,1.891e-11,2.513e-11,4.593e-11,4.631e-11,4.794e-11,4.926e-11,5.274e-11,6.952e-11,7.319e-11,1.841e-10,2.973e-10,3.185e-10,4.332e-10,4.418e-10,4.745e-10,6.677e-10,9.561e-10,1.088e-09,1.624e-09,2.177e-09,2.411e-09,2.838e-09,2.889e-09,3.141e-09,3.36e-09,5.438e-09,5.457e-09,5.…	3R_11893970_INS,3L_1912293_SNP	2.718e-06,2.801e-06
FBgn0026721	2R	12941507	12946804	+	X_19238292_SNP(trans-inter-arm)					X_19238292_SNP	2.017e-08
FBgn0026761	2R	2521152	2523767	-	2R_2521923_SNP(cis),2R_2549617_SNP(trans-intra-arm)	2R_2521923_SNP,2R_2523756_SNP,2R_2523826_SNP	1.799e-09,2.731e-09,2.184e-08	2R_2522211_SNP,2R_2507824_SNP,2R_2528034_SNP,2R_2515954_SNP,2R_2404801_SNP,2R_2417088_SNP,2R_2549617_SNP,2R_2528066_SNP,2R_2538432_SNP,2R_2522400_SNP,2R_2518214_SNP	1.943e-08,2.236e-08,3.544e-08,4.391e-08,4.527e-08,4.945e-08,7.928e-08,1.132e-07,1.228e-07,1.752e-07,2.39e-07
FBgn0027073	2R	17100385	17102477	-	2R_17102345_INS(cis)	2R_17102222_SNP,2R_17102265_INS,2R_17102221_SNP,2R_17102345_INS,2R_17102205_SNP,2R_17102200_SNP,2R_17102202_SNP,2R_17102229_DEL,2R_17102365_SNP,2R_17102454_SNP,2R_17101731_SNP,2R_17101725_SNP,2R_17101954_SNP	1.557e-15,2.375e-15,3.204e-15,3.223e-15,8.329e-15,7.419e-13,9.858e-13,1.45e-12,6.709e-12,1.978e-09,1.662e-08,1.783e-08,5.228e-08
FBgn0027080	3L	16410449	16412402	-	3L_16412284_SNP(cis),3L_16415280_SNP(trans-intra-arm)	3L_16412284_SNP,3L_16412239_SNP	1.11e-11,1.879e-09	3L_16415280_SNP,3L_16414516_SNP,3L_16414519_SNP,3L_16414480_SNP	8.439e-09,1.875e-08,1.875e-08,1.232e-07
FBgn0027082	3L	2650161	2651850	-	3L_2652424_SNP(cis),3L_2654219_SNP(trans-intra-arm)	3L_2652424_SNP,3L_2651823_SNP,3L_2651849_SNP,3L_2651774_INS,3L_2651910_SNP,3L_2651715_SNP,3L_2651562_SNP,3L_2652349_SNP,3L_2651890_SNP,3L_2652271_SNP,3L_2651856_SNP,3L_2652268_SNP,3L_2650818_SNP	6.06e-15,3.837e-10,4.236e-10,6.848e-10,7.432e-10,6.21e-09,1.551e-08,2.134e-08,1.439e-07,1.824e-07,1.915e-07,1.928e-07,1.974e-07	3L_2654260_SNP,3L_2654219_SNP	2.222e-08,5.672e-08
FBgn0027087	X	18409461	18414478	+	X_18409557_SNP(cis)	X_18409557_SNP	2.081e-53	X_18411057_SNP,X_18408230_SNP,X_18408196_SNP,X_18407045_SNP,X_18406281_SNP	4.758e-49,2.694e-36,2.841e-29,2.354e-12,1.226e-11
FBgn0027094	2L	8378262	8381764	-	2L_8380945_SNP(cis),2L_9387371_SNP(trans-intra-arm)	2L_8380945_SNP,2L_8378415_SNP,2L_8378400_SNP,2L_8378530_SNP,2L_8381521_SNP	1.579e-12,3.186e-11,4.509e-08,1.54e-07,4.268e-07	2L_8373404_SNP,2L_8373381_SNP,2L_8373394_INS,2L_8373391_SNP,2L_8379781_SNP,2L_8373413_SNP,2L_8379784_SNP,2L_8372849_SNP,2L_8379406_SNP,2L_8379799_SNP,2L_8379802_SNP,2L_8377243_SNP,2L_8375955_SNP,2L_9387371_SNP,2L_8373034_SNP	4.611e-10,4.704e-10,5.683e-10,7.506e-10,2.699e-09,3.108e-09,3.571e-09,3.6e-09,6.104e-09,6.551e-09,6.551e-09,7.852e-09,3.035e-08,3.931e-07,4.223e-07
FBgn0027095	3R	12175126	12176523	+	3R_12175310_SNP(cis)	3R_12175310_SNP	1.048e-09
FBgn0027348	2L	14013004	14019328	+	3R_17570181_SNP(trans-inter-arm)					3R_17570181_SNP	2.792e-09
FBgn0027360	2R	17577720	17578644	-	2R_17578508_SNP(cis)	2R_17578508_SNP,2R_17578529_SNP	8.921e-13,7.525e-12
FBgn0027453	2L	10854435	10856644	-	2L_10855076_SNP(cis),2L_10856399_SNP(cis)	2L_10855076_SNP,2L_10856148_SNP,2L_10856264_SNP,2L_10856074_SNP,2L_10855846_SNP,2L_10856137_SNP,2L_10856139_SNP,2L_10856281_SNP,2L_10853830_SNP,2L_10856144_SNP,2L_10854195_SNP,2L_10856404_SNP,2L_10856399_SNP,2L_10856662_DEL,2L_10856237_SNP,2L_10857061_SNP,2L_10853991_SNP,2L_10857033_SNP,2L_10855137_SNP,2L_10855034_SNP,2L_10855783_SNP,2L_10856811_SNP,2L_10855987_SNP,2L_10854177_SNP,2L_10857545_SNP…	8.384e-20,9.641e-19,1.163e-17,1.058e-14,3.731e-14,4.158e-14,5.439e-14,6.5e-14,1.275e-13,1.464e-13,5.487e-13,7.114e-13,1.23e-12,3.44e-11,5.27e-11,5.792e-11,1.031e-10,1.282e-10,2.935e-10,7.191e-10,1.034e-09,4.615e-09,6.634e-09,9.22e-09,1.372e-08,1.587e-08,3.608e-08,3.894e-08,5.116e-08,5.499e-08,1.151e-07,1.477e-07,1.984e-07,3.317e-07,3.62e-07,5.48e-07,6.021e-07,7.623e-07,1.147e-06,1.212e-06,1.214e-…	2L_10852698_SNP,2L_10850300_SNP,2L_10838949_SNP,2L_10855595_SNP,2L_10865246_SNP,2L_10839026_SNP,2L_10839021_SNP,2L_10855439_SNP,2L_10839030_SNP,2L_10861810_SNP,2L_10867627_SNP,2L_9640995_SNP,2L_9641597_SNP	5.219e-08,1.916e-07,2.933e-07,3.673e-07,3.678e-07,4.071e-07,5.352e-07,5.451e-07,6.507e-07,8.792e-07,1.156e-06,1.478e-06,1.478e-06
FBgn0027497	3R	1568232	1572584	+	3R_1519075_SNP(trans-intra-arm)			3R_1519075_SNP,3R_1540509_SNP,3R_1540736_SNP	1.262e-08,2.095e-08,3.547e-08
FBgn0027503	3R	4810440	4816371	+	2R_17622275_SNP(trans-inter-arm)					2R_17622275_SNP	3.292e-10
FBgn0027532	3L	22060344	22064948	-	2R_17622275_SNP(trans-inter-arm)					2R_17622275_SNP	5.239e-09
FBgn0027550	2L	10761116	10764971	+	2L_10763709_SNP(trans-intra-arm)			2L_10763713_SNP,2L_10763737_SNP,2L_10763024_SNP,2L_10767413_SNP,2L_10763860_SNP,2L_10763709_SNP,2L_10774559_SNP,2L_10763747_SNP,2L_10767408_SNP	3.249e-10,3.437e-10,4.091e-10,7.944e-10,1.599e-08,1.726e-08,5.142e-08,8.271e-08,1.689e-07
FBgn0027552	3L	3941008	3942465	-	3L_3940058_SNP(cis)	3L_3940058_SNP,3L_3941038_DEL,3L_3940590_SNP,3L_3940604_SNP,3L_3940599_SNP,3L_3941551_SNP,3L_3941595_SNP,3L_3940138_SNP,3L_3940103_SNP,3L_3940123_SNP	3.128e-10,3.208e-10,2.646e-09,4.325e-08,4.673e-08,8.643e-08,9.057e-08,1.231e-07,1.38e-07,1.85e-07	3L_3937175_SNP,3L_3939295_SNP,3L_3937992_SNP,3L_3937100_SNP,3L_3938507_SNP	3.743e-09,4.425e-08,5.526e-08,9.372e-08,1.231e-07
FBgn0027561	2R	5010809	5019535	-	X_10943125_SNP(trans-inter-arm)					X_10943125_SNP	4.499e-09
FBgn0027563	3R	10050820	10052484	-	3R_10050253_SNP(cis),3R_10833926_SNP(trans-intra-arm),3R_10181344_SNP(trans-intra-arm)	3R_10050253_SNP	1.588e-14	3R_10181344_SNP,3R_10833926_SNP	2.188e-14,8.389e-14
FBgn0027567	3L	9857739	9863774	+	2L_11199721_SNP(trans-inter-arm)					2L_11199721_SNP	1.745e-08
FBgn0027575	3R	17596055	17601562	-	3R_11373954_INS(trans-intra-arm),X_4417201_SNP(trans-inter-arm),X_3613994_SNP(trans-inter-arm)			3R_11357623_SNP,3R_11346879_SNP,3R_11368646_SNP,3R_11362082_SNP,3R_11365565_SNP,3R_11344285_SNP,3R_11366820_SNP,3R_11367541_SNP,3R_11367775_SNP,3R_11348112_SNP,3R_11364535_SNP,3R_11367759_SNP,3R_11349129_SNP,3R_11367496_SNP,3R_11367782_SNP,3R_11357420_SNP,3R_11361091_SNP,3R_11361141_SNP,3R_11353774_SNP,3R_11354675_SNP,3R_11367676_SNP,3R_11345144_SNP,3R_11371147_SNP,3R_11368416_SNP,3R_11389125_SNP…	7.462e-09,2.639e-08,3.314e-08,4.476e-08,4.485e-08,6.55e-08,1.073e-07,1.124e-07,1.477e-07,1.526e-07,1.739e-07,1.79e-07,1.81e-07,1.822e-07,1.84e-07,1.897e-07,1.918e-07,1.918e-07,2.263e-07,2.263e-07,2.89e-07,4.023e-07,4.964e-07,5.254e-07,5.35e-07,6.482e-07,6.628e-07,7.423e-07,7.974e-07,8.464e-07,9.031e-07,9.942e-07,1.14e-06,1.157e-06,1.166e-06,1.343e-06,1.368e-06,1.371e-06,1.372e-06,1.544e-06	X_3608283_SNP,X_3608291_SNP,X_3613994_SNP,X_3608218_SNP,X_4417201_SNP,X_3610537_SNP,X_3608271_SNP,X_3609824_SNP,X_3609722_SNP,X_3608208_SNP,X_3608078_SNP	4.386e-08,2.03e-07,3.729e-07,5.49e-07,6.372e-07,7.2e-07,7.403e-07,8.543e-07,1.307e-06,1.454e-06,1.558e-06
FBgn0027578	3R	24709415	24711737	+	3R_24712855_SNP(trans-intra-arm)	3R_24709600_SNP,3R_24711514_SNP,3R_24709732_SNP,3R_24712655_SNP,3R_24711949_SNP,3R_24709993_SNP,3R_24712036_SNP,3R_24709360_SNP,3R_24709136_SNP,3R_24711432_SNP,3R_24709169_SNP,3R_24710771_SNP,3R_24711691_SNP,3R_24711113_SNP,3R_24711685_SNP	4.5e-11,3.094e-10,5.083e-10,1.58e-09,2.059e-09,4.457e-09,5.043e-09,8.361e-09,3.628e-08,3.635e-08,8.965e-08,1.123e-07,2.838e-07,7.551e-07,1.203e-06	3R_24712855_SNP,3R_24712933_SNP,3R_24712837_SNP,3R_24714808_SNP,3R_24719621_SNP,3R_24719741_SNP,3R_24719539_SNP,3R_24717360_SNP,3R_24705621_SNP,3R_24710620_SNP,3R_24718536_SNP,3R_24717050_SNP,3R_24722416_SNP,3R_24718586_SNP,3R_24710416_SNP,3R_24718506_SNP,3R_24718588_SNP,3R_24716397_SNP,3R_24719216_SNP,3R_24713107_SNP,3R_24716357_SNP,3R_24716399_SNP,3R_24713619_SNP,3R_24717256_SNP,3R_24715275_SNP…	9.302e-12,9.729e-11,2.235e-10,3.306e-10,5.508e-10,5.769e-10,7.893e-10,8.613e-10,8.615e-10,8.738e-10,1.431e-09,1.711e-09,2.208e-09,4.495e-09,5.346e-09,5.559e-09,5.765e-09,6.11e-09,6.121e-09,8.124e-09,8.907e-09,8.907e-09,9.125e-09,9.731e-09,1.013e-08,1.078e-08,1.272e-08,1.291e-08,1.807e-08,2.017e-08,2.054e-08,2.433e-08,2.994e-08,3.003e-08,3.349e-08,4.418e-08,4.474e-08,4.858e-08,1.2e-07,1.266e-07,1.…	2R_5519951_SNP,X_14481254_SNP	3.652e-07,1.207e-06
FBgn0027580	2R	5738208	5749048	-	2R_5745118_SNP(trans-intra-arm),2L_9474638_SNP(trans-inter-arm)			2R_5745097_SNP,2R_5745118_SNP,2R_5739763_SNP,2R_5739514_SNP,2R_5778464_SNP,2R_5739874_SNP,2R_5739871_SNP,2R_5778647_SNP,2R_5778633_SNP,2R_5739865_SNP,2R_5739790_SNP,2R_5778587_SNP	4.036e-10,6.573e-10,5.767e-09,8.395e-09,9.919e-09,1.072e-08,1.56e-08,2.599e-08,3.227e-08,3.995e-08,6.323e-08,1.491e-07	2L_9474638_SNP	2.512e-07
FBgn0027581	2R	9467818	9480844	-	2R_9467919_SNP(cis)	2R_9467919_SNP,2R_9467978_SNP,2R_9467085_SNP	1.011e-22,1.175e-13,8.167e-08	2R_9463341_SNP,2R_9465233_SNP,2R_9463350_SNP,2R_9463359_DEL,2R_9463335_SNP,2R_9463416_SNP,2R_9463330_SNP,2R_9463339_SNP,2R_9465403_SNP	1.504e-08,1.536e-08,1.663e-08,3.032e-08,3.479e-08,4.355e-08,6.106e-08,7.66e-08,9.465e-08
FBgn0027583	3R	25560991	25562467	-	3R_25561398_SNP(cis),3R_25562774_SNP(cis)	3R_25561361_SNP,3R_25561398_SNP,3R_25561429_SNP,3R_25562153_SNP,3R_25562514_SNP,3R_25561413_SNP,3R_25561482_SNP,3R_25562774_SNP,3R_25562517_SNP,3R_25562418_SNP,3R_25562591_SNP,3R_25562554_SNP,3R_25562138_SNP,3R_25561229_SNP,3R_25561276_SNP,3R_25562603_SNP,3R_25562623_SNP,3R_25562636_SNP,3R_25562559_SNP,3R_25562696_SNP,3R_25562113_SNP,3R_25562165_SNP,3R_25562170_SNP,3R_25562532_SNP,3R_25562394_INS	1.302e-18,6.516e-18,2.632e-17,3.575e-12,1.626e-10,2.875e-10,3.353e-10,9.078e-10,1.219e-09,1.911e-09,6.147e-09,8.804e-09,1.125e-08,1.207e-08,3.652e-08,5.054e-08,5.054e-08,5.054e-08,9.564e-08,1.207e-07,2.706e-07,3.4e-07,6.007e-07,6.033e-07,7.164e-07	3R_25566546_SNP,3R_25566674_SNP,3R_25566677_SNP,3R_25570439_SNP,3R_25566593_SNP	2.221e-08,2.066e-07,2.066e-07,2.416e-07,3.786e-07
FBgn0027584	3R	6986929	6989220	+	3R_6994793_SNP(trans-intra-arm),3R_6987842_SNP(cis)	3R_6987842_SNP	3.588e-09	3R_6994793_SNP,3R_6967973_INS,3R_6993432_SNP	1.352e-09,6.403e-09,6.035e-08
FBgn0027590	2R	20654241	20655695	-	2R_20667324_SNP(trans-intra-arm)			2R_20667324_SNP	6.511e-09
FBgn0027608	3R	1584402	1606798	-	3R_1603498_DEL(trans-intra-arm),3R_1526975_SNP(trans-intra-arm)			3R_1603498_DEL,3R_1526975_SNP,3R_1635664_SNP,3R_1303415_SNP	7.192e-13,2.681e-09,3.177e-09,4.352e-09
FBgn0027609	2L	4442870	4444680	-	2L_4444154_SNP(cis)	2L_4444154_SNP,2L_4443232_SNP,2L_4443670_SNP	3.226e-12,1.946e-11,2.493e-10
FBgn0027619	2R	5856434	5858402	+	3L_889528_SNP(trans-inter-arm)					3L_889528_SNP	5.705e-09
FBgn0027620	3R	27619703	27625521	+	2L_11199721_SNP(trans-inter-arm)					2L_11199721_SNP,2L_11199726_SNP	3.519e-09,1.317e-08
FBgn0027657	3R	11722648	11730243	-	3R_11727280_SNP(trans-intra-arm)			3R_11727280_SNP,3R_11703256_SNP,3R_11725105_SNP	2.654e-16,1.314e-09,4.31e-09
FBgn0027780	2L	8445861	8449576	-	2L_8448996_SNP(cis),2L_8448188_SNP(trans-intra-arm)	2L_8448996_SNP,2L_8448836_SNP,2L_8449440_SNP,2L_8449139_SNP,2L_8449486_SNP,2L_8449530_SNP,2L_8449218_SNP,2L_8449237_SNP,2L_8449260_SNP,2L_8448791_SNP,2L_8449926_SNP,2L_8450488_SNP,2L_8446694_SNP,2L_8449981_SNP,2L_8449982_SNP,2L_8449097_SNP,2L_8450380_SNP,2L_8448601_SNP,2L_8449437_INS,2L_8446796_SNP,2L_8450386_SNP,2L_8448769_SNP,2L_8448858_SNP	6.997e-18,3.812e-17,2.244e-15,3.335e-15,6.074e-15,1.084e-13,1.407e-13,4.005e-13,1.104e-11,7.829e-11,6.184e-09,1.627e-08,1.855e-08,2.662e-08,3.414e-08,4.648e-08,5.986e-08,8.976e-08,1.455e-07,1.625e-07,1.686e-07,2.839e-07,5.047e-07	2L_8447579_SNP,2L_8447494_SNP,2L_8448454_SNP,2L_8448406_SNP,2L_8447999_SNP,2L_8447914_INS,2L_8450743_SNP,2L_8448315_SNP,2L_8448188_SNP,2L_8447416_SNP,2L_8448512_SNP,2L_8447990_SNP,2L_8448035_SNP,2L_8446976_SNP,2L_8446982_SNP,2L_8447135_SNP,2L_8447501_SNP,2L_8448529_SNP,2L_8447093_SNP,2L_8447314_SNP,2L_8447315_SNP,2L_8450668_SNP,2L_8447645_SNP,2L_8447765_SNP,2L_8447933_SNP	7.342e-14,2.678e-13,1.463e-12,5.646e-12,5.999e-12,4.954e-11,5.036e-11,5.754e-11,1.234e-10,1.505e-08,1.513e-08,1.781e-08,2.505e-08,3.125e-08,3.125e-08,3.318e-08,3.521e-08,4.612e-08,6.512e-08,1.176e-07,1.476e-07,2.556e-07,3.529e-07,9.75e-07,1.004e-06	2R_7040297_SNP	4.397e-07
FBgn0027784	3R	14855690	14856993	-	3R_14855814_SNP(cis)	3R_14855814_SNP,3R_14856250_SNP,3R_14854841_SNP,3R_14854838_SNP	3.113e-12,2.684e-11,1.77e-08,2.253e-08
FBgn0027929	2L	13963507	13965088	+	2L_14272486_SNP(trans-intra-arm),2L_14103076_SNP(trans-intra-arm)			2L_14272486_SNP,2L_13865043_SNP,2L_14103076_SNP,2L_14153560_SNP,2L_13937508_SNP,2L_13937463_SNP,2L_2541145_SNP,2L_2462748_SNP,2L_13777506_SNP,2L_13962064_SNP,2L_7457399_SNP,2L_2593061_SNP,2L_14281847_SNP,2L_7457453_SNP,2L_14008707_SNP,2L_2454006_DEL,2L_10628712_SNP,2L_13937499_SNP,2L_13747396_SNP,2L_14776941_SNP,2L_2302102_SNP,2L_13962069_SNP,2L_13746003_SNP,2L_14143395_SNP,2L_2511398_SNP,2L_1392…	7.604e-13,9.089e-12,1.395e-11,9.37e-11,1.72e-10,2.459e-10,4.36e-10,5.57e-10,7.499e-10,1.425e-09,1.499e-09,1.525e-09,1.658e-09,1.82e-09,1.867e-09,2.224e-09,2.887e-09,3.076e-09,3.44e-09,3.531e-09,3.751e-09,3.914e-09,4.134e-09,4.618e-09,4.748e-09,4.799e-09,5.297e-09,5.585e-09,6.305e-09,6.606e-09,7.416e-09,7.439e-09,7.573e-09,7.999e-09,8.517e-09,9.832e-09,1.105e-08,1.134e-08,1.158e-08,1.181e-08,1.23e…	2R_19673033_SNP,3L_10387937_SNP,2R_19677492_SNP,X_12996708_SNP,2R_19673705_SNP,2R_19674327_SNP,X_3603279_SNP	1.991e-08,7.135e-08,1.031e-07,1.33e-07,1.522e-07,1.61e-07,1.611e-07
FBgn0027934	3R	3352091	3353790	+	3R_3352543_SNP(cis),3R_3410082_SNP(trans-intra-arm),3R_3370458_SNP(trans-intra-arm)	3R_3352543_SNP,3R_3352440_SNP,3R_3352551_SNP,3R_3351927_SNP,3R_3351122_SNP,3R_3351354_SNP,3R_3352387_SNP,3R_3351158_SNP	8.725e-18,2.415e-17,2.675e-15,2.336e-14,3.754e-12,1.04e-11,4.765e-11,2.719e-09	3R_3359368_SNP,3R_3370458_SNP,3R_3358796_SNP,3R_3350035_SNP,3R_3355856_SNP,3R_3359323_SNP,3R_3435761_SNP,3R_3356089_SNP,3R_3355854_SNP,3R_3355807_SNP,3R_3364516_SNP,3R_3350862_SNP,3R_3486731_SNP,3R_3355575_SNP,3R_3356143_SNP,3R_3350253_SNP,3R_3401033_SNP,3R_3410082_SNP,3R_3410081_SNP,3R_3396036_SNP,3R_3417147_SNP,3R_3410205_SNP,3R_3361288_SNP,3R_3359606_SNP,3R_3410617_SNP,3R_3358745_SNP,3R_348587…	5.698e-17,1.906e-15,3.531e-15,6.306e-15,7.262e-14,1.631e-13,2.895e-13,4.838e-13,7.778e-13,8.488e-13,3.539e-12,1.096e-11,1.488e-11,2.212e-11,2.665e-11,3.94e-11,5.426e-11,6.853e-11,7.387e-11,7.965e-11,8.753e-11,1.416e-10,2.27e-10,7.22e-10,8.379e-10,1.146e-09,1.26e-09,1.355e-09,1.54e-09,1.726e-09,1.828e-09,1.902e-09,2.032e-09,2.167e-09,2.22e-09,2.811e-09,2.934e-09,3.312e-09,3.369e-09,3.436e-09,3.445…	2L_11157239_SNP,2L_11157241_SNP,3L_7485994_SNP,3L_7485995_SNP,3L_7486023_SNP,3L_7484959_SNP,3L_7484845_SNP,2L_15141129_SNP,2R_14360388_SNP,2R_14057889_SNP	1.905e-10,2.051e-10,4.361e-10,4.361e-10,4.361e-10,7.862e-10,2.003e-09,2.632e-09,3.499e-09,5.365e-09
FBgn0027950	3R	5385482	5387255	+	2R_17622275_SNP(trans-inter-arm)					2R_17622275_SNP	6.792e-09
FBgn0028369	X	2634417	3028565	+	X_2969432_SNP(trans-intra-arm),3L_22019297_SNP(trans-inter-arm)			X_2969432_SNP,X_2969709_SNP,X_2975036_SNP,X_2969705_SNP,X_2975383_SNP,X_2975038_INS,X_2975371_SNP,X_2975388_SNP,X_2975384_SNP,X_2975033_SNP,X_2975045_SNP,X_2975172_SNP,X_2975090_SNP,X_2969694_SNP,X_2975118_SNP,X_2975313_SNP,X_2975095_SNP,X_2975122_SNP,X_2975168_SNP,X_2975359_SNP,X_2975365_INS,X_2975288_SNP,X_2975167_SNP,X_2975269_SNP,X_2975012_SNP,X_2975005_SNP,X_2975245_SNP,X_2976211_SNP,X_29760…	3.904e-13,6.52e-13,6.689e-13,3.702e-12,4.458e-12,6.283e-12,7.168e-12,8.626e-12,1.02e-11,1.351e-11,1.442e-11,1.454e-11,1.516e-11,1.618e-11,1.718e-11,2.01e-11,2.188e-11,2.657e-11,2.805e-11,3.01e-11,3.231e-11,3.53e-11,4.577e-11,5.459e-11,8.182e-11,1.047e-10,1.266e-10,3.181e-10,6.009e-10,6.118e-10,7.227e-10,7.819e-10,9.489e-10,6.432e-09,2.217e-07	3L_22019297_SNP	4.729e-07
FBgn0028372	2R	15558123	15560982	+	2R_15560714_SNP(cis),2R_15560730_SNP(cis)	2R_15560714_SNP,2R_15560730_SNP,2R_15557153_SNP,2R_15557328_SNP	6.844e-09,5.562e-08,1.071e-07,1.299e-07	2R_15556193_SNP,2R_15556045_SNP,2R_15554084_SNP,2R_15556097_SNP,2R_15563113_SNP,2R_15556317_SNP,2R_17658982_SNP,2R_15556019_SNP,2R_15556883_SNP,2R_15556068_SNP	1.824e-08,1.126e-07,1.161e-07,1.196e-07,1.233e-07,1.778e-07,3.196e-07,3.535e-07,3.953e-07,4.191e-07
FBgn0028394	2L	8529141	8541439	+	2L_8528886_SNP(cis)	2L_8528886_SNP,2L_8528721_SNP,2L_8529270_SNP,2L_8529275_SNP,2L_8529325_SNP,2L_8528806_SNP,2L_8528842_SNP,2L_8528825_SNP,2L_8528818_SNP,2L_8528846_SNP,2L_8528865_SNP,2L_8528881_SNP	1.047e-14,1.167e-12,6.499e-11,6.572e-11,7.172e-10,3.102e-09,4.908e-09,1.495e-08,1.508e-08,1.736e-08,2.79e-08,3.084e-08	2L_8524089_SNP,2L_8530244_SNP,2L_8530270_SNP,2L_8509116_SNP,2L_8539516_SNP,2L_8533806_SNP,2L_8515482_SNP,2L_8433744_SNP,2L_8530229_SNP,2L_8523207_SNP,2L_8506037_SNP,2L_8531505_SNP,2L_8525014_SNP,2L_8521633_SNP	1.059e-12,1.547e-11,2.812e-11,3.17e-10,8.229e-10,1.392e-09,1.755e-09,3.921e-09,1.021e-08,1.212e-08,5.347e-08,6.609e-08,1.079e-07,1.128e-07	3L_4617785_SNP,X_20405518_SNP	1.016e-07,1.122e-07
FBgn0028398	2L	2767890	2768612	+	2L_2768444_SNP(cis),2L_2762285_SNP(trans-intra-arm)	2L_2768444_SNP,2L_2768471_SNP,2L_2768459_SNP,2L_2768272_SNP,2L_2768339_SNP,2L_2768603_SNP,2L_2768342_SNP,2L_2768945_SNP,2L_2766968_SNP,2L_2766969_SNP,2L_2767586_SNP,2L_2767601_SNP,2L_2767520_SNP,2L_2767857_SNP,2L_2767867_SNP,2L_2767411_SNP,2L_2767212_SNP	1.238e-16,1.843e-14,3.191e-14,4.24e-13,2.405e-12,6.757e-12,1.5e-11,3.367e-11,1.395e-10,2.844e-10,6.039e-10,1.098e-09,2.153e-08,2.916e-08,5.319e-08,4.001e-07,7.86e-07	2L_2765447_SNP,2L_2764248_DEL,2L_2764738_SNP,2L_2766575_SNP,2L_2763791_SNP,2L_2764202_SNP,2L_2763711_SNP,2L_2765894_SNP,2L_2763913_SNP,2L_2766296_SNP,2L_2763286_SNP,2L_2764032_SNP,2L_2764648_SNP,2L_2763809_DEL,2L_2762016_SNP,2L_2762078_SNP,2L_2764195_SNP,2L_2765436_SNP,2L_2764027_SNP,2L_2762343_SNP,2L_2764097_SNP,2L_2771932_SNP,2L_2762342_SNP,2L_2762015_SNP,2L_2765954_SNP,2L_2764642_SNP,2L_276236…	9.071e-13,9.062e-12,1.457e-11,5.087e-11,7.079e-11,1.52e-10,2.078e-10,2.148e-10,2.652e-10,3.687e-10,4.46e-10,5.151e-10,1.135e-09,1.168e-09,1.348e-09,1.358e-09,1.413e-09,1.452e-09,1.546e-09,1.941e-09,2.002e-09,2.251e-09,2.914e-09,5.736e-09,8.091e-09,8.283e-09,9.683e-09,1.465e-08,1.558e-08,1.586e-08,1.653e-08,1.943e-08,2.086e-08,2.185e-08,4.253e-08,4.425e-08,4.891e-08,5.072e-08,5.313e-08,5.391e-08,5…
FBgn0028406	2L	13283912	13286462	-	2L_13286487_SNP(cis)	2L_13286542_SNP,2L_13286608_SNP,2L_13286487_SNP,2L_13287042_SNP,2L_13285990_SNP,2L_13286109_SNP,2L_13285850_SNP	7.661e-17,9.303e-17,1.651e-16,3.458e-12,5.795e-10,1.081e-08,1.038e-07	2L_13277266_SNP,2L_13278691_SNP	3.387e-09,6.543e-09
FBgn0028429	3L	9827467	9829905	-	3L_9829011_SNP(cis)	3L_9829011_SNP,3L_9829121_SNP,3L_9829137_SNP,3L_9829541_SNP,3L_9829629_SNP,3L_9829384_SNP,3L_9828375_SNP,3L_9827778_SNP	4.321e-12,1.345e-09,1.746e-09,1.457e-08,1.723e-08,4.462e-08,1.035e-07,1.947e-07	3L_9828560_SNP	5.097e-08
FBgn0028473	2R	5283770	5286239	-	2R_5283898_SNP(cis)	2R_5283898_SNP	1.148e-08
FBgn0028474	X	5560085	5564685	+	X_5564214_SNP(cis),X_5553993_SNP(trans-intra-arm)	X_5564214_SNP,X_5564020_SNP,X_5564018_SNP,X_5564165_SNP,X_5564014_SNP,X_5564183_SNP,X_5564013_SNP,X_5563985_INS,X_5564167_SNP,X_5564254_SNP,X_5564387_SNP	5.091e-34,9.809e-27,1.032e-26,2.167e-26,1.548e-25,2.064e-25,2.022e-24,1.846e-19,6.646e-12,1.649e-08,1.649e-08	X_5554547_SNP,X_5557522_SNP,X_5553993_SNP,X_5556427_SNP,X_5554523_SNP,X_5554628_SNP,X_5563402_INS,X_5561291_SNP	1.001e-08,1.03e-08,1.08e-08,1.08e-08,1.149e-08,1.212e-08,1.627e-08,4.365e-08
FBgn0028476	3R	25054883	25061024	+	3R_25056495_SNP(trans-intra-arm)	3R_25055674_SNP,3R_25055751_SNP	2.527e-10,2.193e-09	3R_25056495_SNP,3R_25056539_SNP,3R_25056541_SNP,3R_25056013_SNP,3R_25058206_SNP,3R_25056859_SNP,3R_25056858_SNP,3R_25056880_SNP,3R_25058549_SNP,3R_25056483_SNP	9.972e-24,4.714e-23,1.164e-22,2.127e-18,2.693e-14,1.843e-13,2.188e-13,8.995e-13,2.849e-12,3.349e-08
FBgn0028504	3L	2595842	2599579	-	3L_2595606_DEL(cis),3L_1698141_SNP(trans-intra-arm)	3L_2595606_DEL,3L_2595279_SNP,3L_2594898_SNP,3L_2599214_SNP,3L_2595336_SNP,3L_2598932_SNP,3L_2598871_SNP,3L_2596228_SNP,3L_2599958_SNP,3L_2596555_SNP,3L_2595658_SNP,3L_2600349_SNP,3L_2596559_SNP	4.525e-12,4.487e-11,9.244e-11,6.051e-10,6.057e-10,9.788e-10,6.852e-09,7.142e-09,1.205e-08,1.169e-07,3.263e-07,4.079e-07,4.641e-07	3L_2593709_SNP,3L_2592540_SNP,3L_2592679_SNP,3L_2592523_SNP,3L_2598403_SNP,3L_2598090_SNP,3L_2597659_SNP,3L_2597464_SNP,3L_2597622_SNP,3L_2602974_SNP,3L_2598091_SNP,3L_2593742_SNP,3L_2597646_SNP,3L_2591446_SNP,3L_2602564_SNP,3L_2600688_SNP,3L_2602530_SNP,3L_2597631_SNP,3L_1698141_SNP,3L_2602620_SNP,3L_2592055_SNP,3L_2601394_SNP,3L_2601374_SNP,3L_2603604_SNP	5.555e-12,2.271e-11,2.635e-11,3.105e-11,6.051e-10,9.354e-10,3.007e-09,8.043e-09,1.193e-08,1.539e-08,1.823e-08,3.766e-08,3.9e-08,5.159e-08,1.064e-07,1.284e-07,1.655e-07,2.722e-07,3.902e-07,4.372e-07,5.694e-07,7.183e-07,7.249e-07,7.609e-07	3R_16315786_SNP	4.112e-07
FBgn0028507	2L	15764220	15766267	+	2L_15764932_SNP(cis)	2L_15764932_SNP,2L_15764124_SNP,2L_15764980_SNP	3.503e-09,4.599e-09,1.131e-08
FBgn0028519	2L	14027001	14029368	+	2L_14029270_SNP(cis)	2L_14029270_SNP,2L_14027634_SNP	7.607e-13,9.636e-08	2L_14030478_SNP,2L_14024772_SNP,2L_14022613_SNP	1.637e-11,4.989e-08,8.395e-08
FBgn0028525	2L	16303264	16305940	+	2L_16303269_SNP(cis),2L_16305434_SNP(cis)	2L_16303269_SNP,2L_16302978_DEL,2L_16303229_SNP,2L_16303418_SNP,2L_16303063_SNP,2L_16303231_SNP,2L_16304119_SNP,2L_16303197_SNP,2L_16303327_SNP,2L_16303196_SNP,2L_16302844_SNP,2L_16303206_SNP,2L_16305434_SNP,2L_16304066_SNP,2L_16303194_SNP,2L_16303078_SNP,2L_16302993_SNP,2L_16305416_SNP,2L_16306654_SNP,2L_16303390_SNP,2L_16303138_SNP,2L_16303766_SNP,2L_16303084_SNP,2L_16303767_SNP,2L_16305511_SNP…	2.622e-14,1.687e-13,9.653e-13,1.348e-12,1.695e-12,2.753e-12,2.873e-12,3.006e-12,6.375e-12,6.401e-12,6.473e-12,1.68e-11,1.68e-11,1.968e-11,2.154e-11,3.207e-11,4.394e-11,4.481e-11,5.485e-11,5.854e-11,1.133e-10,1.942e-10,2.334e-10,2.391e-10,2.764e-10,3.09e-10,3.31e-10,3.323e-10,3.564e-10,6.054e-10,6.34e-10,6.688e-10,8.697e-10,1.103e-09,1.412e-09,1.572e-09,1.613e-09,1.901e-09,2.08e-09,2.364e-09,2.467…	2L_16299763_SNP,2L_16300127_SNP,2L_16302254_SNP,2L_16302210_SNP,2L_16300663_SNP,2L_16300125_SNP,2L_16297511_SNP,2L_16302244_SNP,2L_16313840_SNP,2L_16308341_SNP,2L_16314008_SNP,2L_16314131_SNP,2L_16313872_SNP,2L_16298832_SNP,2L_16314004_SNP,2L_16308339_SNP,2L_16292508_SNP,2L_16304692_SNP,2L_16307255_SNP,2L_16313589_DEL,2L_16304703_SNP,2L_16314039_SNP,2L_16311595_SNP,2L_16313583_DEL,2L_16298315_SNP…	1.896e-12,2.263e-11,2.58e-11,3.538e-11,5.924e-11,9.517e-11,3.496e-10,6.32e-10,7.539e-10,8.635e-10,1.469e-09,1.767e-09,2.699e-09,2.913e-09,2.948e-09,3.084e-09,3.292e-09,3.758e-09,4.092e-09,4.208e-09,4.708e-09,4.851e-09,5.458e-09,5.63e-09,5.914e-09,6.709e-09,7.469e-09,8.478e-09,8.608e-09,9.564e-09,1.095e-08,1.104e-08,1.262e-08,1.412e-08,1.683e-08,1.866e-08,1.904e-08,1.91e-08,2.034e-08,2.687e-08,2.9…	3L_11844887_SNP	2.891e-06
FBgn0028539	2L	13784084	13790562	+	2R_17622275_SNP(trans-inter-arm)					2R_17622275_SNP	1.327e-08
FBgn0028546	2L	13639447	13642602	-	2L_13641174_SNP(trans-intra-arm)			2L_13641174_SNP	6.661e-11	2R_10880847_SNP	6.276e-10
FBgn0028658	2L	13808360	13811474	-	2L_13810140_SNP(trans-intra-arm),2L_13788063_SNP(trans-intra-arm)			2L_13810140_SNP,2L_13788063_SNP,2L_13788566_SNP	5.234e-11,1.493e-09,3.42e-09
FBgn0028671	3R	24956915	24963702	+	3R_24964071_SNP(cis)	3R_24964071_SNP,3R_24964170_SNP,3R_24964379_SNP,3R_24964453_SNP,3R_24963790_SNP,3R_24962818_SNP	1.743e-37,7.398e-32,1.746e-22,1.746e-22,2.555e-15,7.995e-09	3R_24961922_SNP,3R_24962465_SNP,3R_24966016_SNP,3R_24968968_SNP,3R_24962188_SNP,3R_24962190_SNP,3R_24965435_SNP,3R_24966904_SNP,3R_24972159_SNP,3R_24977490_SNP,3R_24966802_SNP,3R_24965537_SNP,3R_24961964_SNP,3R_24962290_SNP,3R_24966022_SNP,3R_24966278_SNP,3R_24974155_SNP,3R_24970341_SNP,3R_24970422_SNP,3R_24974473_SNP,3R_24969025_SNP,3R_24981954_DEL,3R_24981779_SNP,3R_24981837_SNP,3R_24981773_SNP…	3.946e-32,3.104e-24,2.348e-19,6.51e-19,1.105e-18,1.277e-18,8.639e-18,9.917e-18,3.747e-17,4.159e-17,1.397e-16,3.544e-16,3.876e-16,3.285e-15,5.074e-15,9.05e-15,1.033e-14,3.014e-14,8.667e-14,8.986e-14,1.786e-13,3.631e-13,4.036e-13,4.554e-13,5.035e-13,1.225e-12,1.471e-12,1.568e-12,2.371e-12,2.616e-12,5.797e-12,6.823e-12,7.556e-12,1.771e-11,1.796e-11,3.302e-11,1.427e-10,1.543e-10,1.687e-10,1.705e-10,3…	3L_21522240_SNP,3L_21486617_SNP,3L_683870_SNP,3L_8780602_SNP,3L_7037029_SNP,3L_7630115_SNP	3.055e-09,3.5e-09,1.672e-08,2.157e-08,2.866e-08,3.195e-08
FBgn0028683	2R	8521094	8521677	+	2R_8524083_SNP(trans-intra-arm)			2R_8524083_SNP	1.284e-08
FBgn0028746	X	3066301	3067173	-	X_3066574_SNP(cis)	X_3066574_SNP,X_3066569_DEL,X_3066548_SNP,X_3066335_SNP,X_3066405_SNP,X_3066352_SNP,X_3066365_SNP	4.022e-17,1.406e-15,1.102e-14,4.078e-10,1.168e-09,2.209e-09,7.145e-09
FBgn0028836	2R	4308538	4316082	+	2R_4308549_SNP(cis)	2R_4308549_SNP	1.842e-10
FBgn0028841	2L	16365903	16367039	+	3R_22516569_SNP(trans-inter-arm)					3R_22516569_SNP	1.585e-08
FBgn0028853	2L	15285000	15286047	+	2L_15284645_SNP(cis),2R_8120064_SNP(trans-inter-arm)	2L_15284645_SNP,2L_15284680_SNP,2L_15284170_SNP,2L_15284087_SNP,2L_15284786_SNP,2L_15284751_SNP,2L_15284760_SNP	8.971e-22,7.119e-17,1.739e-11,1.945e-09,5.752e-08,1.551e-07,2.567e-07			3L_491350_SNP,3L_19018102_SNP,3L_19016627_SNP,2R_8120064_SNP	7.631e-08,1.331e-07,1.663e-07,3.206e-07
FBgn0028862	2L	15248879	15254715	+	2L_15248836_SNP(cis)	2L_15248836_SNP,2L_15248820_SNP,2L_15248834_SNP,2L_15248827_SNP,2L_15248709_SNP	5.66e-17,1.686e-13,2.771e-11,1.664e-10,1.937e-09
FBgn0028886	2L	14844993	14851749	-	2L_14849332_DEL(trans-intra-arm)			2L_14849332_DEL	7.256e-10
FBgn0028899	2L	16330560	16337885	-	2L_16342612_SNP(trans-intra-arm)			2L_16342612_SNP	6.137e-09
FBgn0028919	2L	13811522	13813316	+	2L_13811764_SNP(cis),X_3609358_SNP(trans-inter-arm)	2L_13812417_SNP,2L_13811764_SNP,2L_13812520_SNP,2L_13811033_SNP,2L_13811256_SNP,2L_13812650_SNP,2L_13812622_SNP,2L_13812862_SNP,2L_13811054_SNP,2L_13813738_SNP	1.652e-15,3.763e-14,4.368e-13,1.323e-11,9.029e-11,1.18e-10,1.212e-10,1.477e-10,4.35e-10,4.309e-09	2L_13815005_SNP,2L_13815403_SNP,2L_13815493_SNP,2L_13817029_SNP,2L_13817011_SNP,2L_13817047_SNP,2L_13817008_SNP,2L_13816758_SNP,2L_13809999_INS,2L_13808429_DEL,2L_13808272_SNP,2L_13808281_SNP,2L_13810137_SNP,2L_13808280_SNP,2L_13808222_INS,2L_9849975_SNP	2.479e-13,2.07e-12,2.523e-12,3.164e-12,4.047e-12,5.675e-12,1.081e-11,5.245e-11,1.167e-10,1.453e-08,2.006e-08,2.494e-08,2.505e-08,7.473e-08,2.145e-07,2.951e-07	X_3609358_SNP	3.347e-07
FBgn0028949	2L	15613905	15614828	-	2L_15614852_SNP(cis),2L_15635001_SNP(trans-intra-arm),2L_14618301_SNP(trans-intra-arm),3L_16875098_SNP(trans-inter-arm)	2L_15614862_SNP,2L_15614855_SNP,2L_15614852_SNP,2L_15614897_SNP,2L_15614992_SNP,2L_15614966_SNP,2L_15615037_SNP,2L_15615268_SNP,2L_15615267_SNP,2L_15614202_SNP,2L_15615062_SNP,2L_15614570_SNP,2L_15614569_SNP,2L_15614043_SNP,2L_15614535_SNP,2L_15614079_SNP,2L_15614525_SNP,2L_15614549_SNP	1.8e-24,2.081e-23,3.517e-23,2.943e-22,5.651e-13,2.755e-12,6.133e-12,1.022e-11,1.333e-11,6.749e-10,1.3e-09,1.823e-09,4.12e-09,5.693e-09,6.841e-09,1.123e-08,1.707e-08,1.743e-08	2L_15635001_SNP,2L_15634101_SNP,2L_15636129_SNP,2L_15636221_SNP,2L_15635746_SNP,2L_15625009_SNP,2L_15633472_SNP,2L_15464545_INS,2L_15464551_DEL,2L_15627259_SNP,2L_15627294_SNP,2L_15615945_SNP,2L_15627280_SNP,2L_15640254_SNP,2L_14630332_SNP,2L_14589507_SNP,2L_15627287_SNP,2L_15627249_INS,2L_15627229_SNP,2L_15647640_SNP,2L_15464523_SNP,2L_14618301_SNP,2L_15464516_SNP	2.906e-18,1.177e-17,3.763e-15,4.071e-15,3.298e-13,8.288e-12,2.873e-11,7.552e-11,1.146e-10,1.147e-10,1.431e-10,5.935e-10,9.567e-10,1.004e-09,1.058e-09,1.49e-09,1.71e-09,1.91e-09,2.145e-09,3.346e-09,8.549e-09,1.489e-08,1.813e-08	2R_10436462_SNP,3L_18127703_SNP,3L_16875098_SNP,2R_9836562_SNP	1.311e-09,8.159e-09,1.155e-08,1.268e-08
FBgn0028992	3R	13217316	13218742	+	3L_6650287_INS(trans-inter-arm)					3L_6650287_INS	2.177e-08
FBgn0029002	3L	271200	275018	+	3L_271435_SNP(cis)	3L_271435_SNP,3L_275652_SNP,3L_274728_SNP,3L_275749_SNP,3L_271292_SNP,3L_275368_SNP	6.123e-11,1.461e-09,1.592e-08,7.381e-08,7.494e-08,1.506e-07	3L_278073_SNP,3L_287434_SNP,3L_278387_SNP,3L_278123_DEL,3L_252497_SNP,3L_273128_SNP,3L_260281_SNP,3L_249970_DEL,3L_267337_INS,3L_276528_SNP,3L_277940_SNP,3L_104115_SNP,3L_284958_SNP,3L_266719_INS,3L_278358_SNP,3L_287330_SNP,3L_276745_SNP,3L_277719_SNP	3.385e-10,1.513e-09,1.694e-09,2.552e-09,1.496e-08,6.187e-08,8.152e-08,1.118e-07,1.123e-07,1.626e-07,2.24e-07,2.824e-07,2.869e-07,3.536e-07,3.658e-07,3.676e-07,4.23e-07,4.627e-07
FBgn0029095	2L	861849	868354	-	2L_865138_SNP(trans-intra-arm)			2L_865138_SNP	7.291e-11
FBgn0029105	2R	19845365	19849154	+	2R_19845389_SNP(cis)	2R_19845389_SNP	3.207e-14	2R_19842302_SNP	4.201e-08
FBgn0029114	3L	15228719	15235932	+	3L_15228258_SNP(cis)	3L_15228258_SNP,3L_15228799_SNP,3L_15229161_SNP,3L_15227993_SNP,3L_15229103_SNP,3L_15229037_SNP	8.108e-14,2.594e-11,2.034e-09,2.101e-09,1.62e-08,6.249e-08	3L_15223488_SNP,3L_15230285_SNP,3L_15224111_SNP,3L_15240126_SNP,3L_15225278_SNP	1.404e-10,2.536e-09,1.26e-08,4.118e-08,1.523e-07
FBgn0029172	3L	11016635	11017946	+	3L_11016619_SNP(cis)	3L_11016619_SNP	1.433e-12
FBgn0029504	X	7576371	7603418	-	X_7582113_SNP(trans-intra-arm)			X_7582113_SNP,X_7582247_SNP	1.19e-11,1.445e-11
FBgn0029522	X	371017	372224	+	3R_19952180_SNP(trans-inter-arm)					3R_19952180_SNP	1.651e-08
FBgn0029523	X	370890	373342	-	X_365269_SNP(trans-intra-arm),X_398580_DEL(trans-intra-arm)	X_373003_SNP,X_373029_SNP,X_370950_SNP,X_371414_SNP,X_370917_SNP,X_370707_SNP,X_370938_INS,X_371682_SNP,X_371001_SNP,X_372645_SNP,X_371586_INS	6.101e-17,1.204e-13,3.005e-13,5.96e-13,6.744e-13,4.567e-12,1.119e-11,6.481e-11,1.058e-10,5.025e-10,9.761e-08	X_365269_SNP,X_377574_SNP,X_382609_SNP,X_387217_SNP,X_387227_SNP,X_394824_SNP,X_382849_SNP,X_394235_SNP,X_367351_SNP,X_385336_SNP,X_392079_SNP,X_395621_SNP,X_382903_SNP,X_366327_SNP,X_378486_SNP,X_392106_SNP,X_385204_SNP,X_387933_SNP,X_388602_DEL,X_392158_SNP,X_386838_SNP,X_385387_SNP,X_382816_SNP,X_378301_DEL,X_375666_SNP,X_397025_SNP,X_382091_SNP,X_384321_SNP,X_385933_SNP,X_397026_SNP,X_386729_…	2.942e-18,2.64e-14,9.737e-14,1.41e-13,1.882e-13,1.964e-13,2.226e-13,2.514e-13,2.55e-13,2.707e-13,3.286e-13,3.441e-13,3.741e-13,3.895e-13,5.069e-13,5.496e-13,5.743e-13,6.527e-13,6.578e-13,6.742e-13,7.51e-13,8.575e-13,9.016e-13,9.744e-13,1.16e-12,1.216e-12,1.255e-12,1.321e-12,1.329e-12,1.4e-12,1.441e-12,2.186e-12,2.324e-12,2.408e-12,2.458e-12,2.734e-12,3.317e-12,5.039e-12,5.451e-12,6.179e-12,8.512e…	2R_19323240_DEL,2R_12698879_SNP	9.973e-07,1.314e-06
FBgn0029603	X	2085672	2087942	-	X_17077701_SNP(trans-intra-arm)			X_17077701_SNP	3.151e-11
FBgn0029608	X	2146365	2148230	-	X_2148087_SNP(cis)	X_2147907_SNP,X_2148087_SNP,X_2149138_SNP,X_2147740_SNP,X_2147769_SNP,X_2147770_SNP,X_2147330_SNP,X_2148549_DEL,X_2146008_SNP,X_2147752_DEL,X_2146973_SNP,X_2146771_SNP,X_2146784_SNP,X_2147401_SNP,X_2147663_SNP	8.764e-33,1.033e-31,3.061e-30,1.025e-29,1.025e-29,1.025e-29,1.222e-27,1.299e-25,7.732e-17,1.906e-11,2.438e-10,1.424e-09,3.117e-09,2.658e-07,1.386e-06	X_2150631_SNP,X_2152937_SNP,X_2139569_SNP,X_2152746_SNP,X_2141835_SNP,X_2141575_SNP,X_2140951_SNP,X_2140465_SNP,X_2141265_SNP,X_2139191_SNP,X_2158022_SNP,X_2156565_SNP,X_2156652_DEL,X_2142591_SNP,X_2155809_SNP,X_2141600_DEL,X_2135315_SNP,X_2142231_SNP,X_2144724_SNP,X_2141328_SNP,X_2141697_SNP,X_2144669_SNP,X_2141447_INS,X_2158663_INS,X_2158666_DEL,X_2150671_SNP,X_2136253_SNP,X_2137732_SNP,X_21340…	4.957e-32,7.264e-23,1.283e-21,1.793e-21,3.762e-21,1.071e-20,3.912e-20,8.877e-20,2.485e-19,5.763e-19,6.399e-18,1.501e-17,2.482e-17,2.632e-16,3.267e-16,4.637e-16,8.344e-16,1.153e-15,1.949e-15,2.278e-15,4.717e-15,5.109e-15,6.672e-15,9.949e-15,9.949e-15,1.506e-14,2.561e-14,2.796e-14,2.947e-14,8.065e-14,9.909e-14,1.116e-13,2.42e-13,3.201e-13,3.49e-13,1.096e-12,1.453e-12,2.121e-12,4.345e-12,7.518e-12,9…	3R_14342031_SNP,3R_14342084_SNP,3R_22748418_SNP	6.399e-08,1.645e-06,1.963e-06
FBgn0029648	X	2842067	2843153	+	X_2841829_SNP(cis),X_2843351_SNP(cis)	X_2841829_SNP,X_2843351_SNP,X_2843353_SNP,X_2843487_SNP,X_2843048_SNP,X_2844152_SNP,X_2843441_SNP	4.178e-15,9.954e-12,1.311e-11,4.802e-11,2.151e-10,6.857e-09,5.702e-08
FBgn0029676	X	3684002	3686510	+	X_3683210_SNP(cis),X_3683951_SNP(cis),3R_22035673_SNP(trans-inter-arm)	X_3683951_SNP,X_3683642_INS,X_3683612_DEL,X_3683316_SNP,X_3683210_SNP,X_3683073_SNP	1.498e-31,7.181e-30,7.245e-30,5.614e-29,7.454e-27,1.154e-26	X_3679912_SNP,X_3680275_SNP,X_3680950_SNP,X_3679595_SNP,X_3682320_SNP,X_3690723_SNP,X_3678826_SNP,X_3678823_SNP,X_3678829_SNP,X_3690718_SNP,X_3671743_SNP,X_3669961_SNP,X_3667838_SNP,X_3672611_SNP,X_3671521_SNP,X_3672624_SNP,X_3666620_SNP,X_3672037_SNP,X_3669064_SNP,X_3671592_SNP,X_3673009_SNP,X_3690734_INS,X_3669061_SNP,X_3666660_SNP,X_3669048_SNP,X_3675430_SNP,X_3674320_SNP,X_3671977_DEL,X_36684…	2.543e-32,3.312e-30,5.715e-29,1.5e-28,1.202e-27,3.815e-27,1.041e-26,1.518e-26,4.84e-26,5.349e-26,9.98e-26,2.47e-25,3.403e-25,4.89e-25,5.133e-25,7.42e-25,9.306e-25,1.047e-24,6.009e-24,6.093e-24,6.143e-24,1.387e-23,1.722e-23,2.184e-23,2.341e-23,3.238e-23,3.279e-23,4.815e-23,1.03e-22,1.075e-22,1.445e-22,2.625e-22,3.254e-22,5.043e-22,5.9e-22,1.432e-21,1.772e-21,5.269e-21,1.171e-20,1.937e-20,2.349e-20…	3R_25006506_SNP,3R_25489285_SNP,3R_22035673_SNP,3R_22035691_SNP	2.602e-07,5.053e-07,6.085e-07,1.515e-06
FBgn0029712	X	4443103	4443990	+	X_4442934_SNP(cis),3L_4436839_SNP(trans-inter-arm)	X_4442934_SNP,X_4442927_SNP,X_4442880_DEL,X_4442903_SNP	9.254e-15,6.366e-13,1.699e-11,6.08e-11			3L_4436839_SNP	1.991e-08
FBgn0029765	X	5321550	5322250	+	X_5321102_SNP(cis)	X_5321102_SNP	1.387e-08
FBgn0029766	X	5323604	5326559	+	X_5326874_INS(cis)	X_5326874_INS,X_5326859_SNP	5.1e-11,1.315e-08
FBgn0029804	X	5659888	5664813	-	X_5660098_INS(cis),3L_10249551_SNP(trans-inter-arm)	X_5660035_SNP,X_5658923_SNP,X_5663878_SNP,X_5663887_SNP,X_5663983_SNP,X_5663849_SNP,X_5663911_SNP,X_5663929_INS,X_5665400_SNP,X_5665430_SNP,X_5660098_INS,X_5659294_SNP,X_5664002_SNP,X_5660805_SNP	1.529e-12,9.631e-12,3.695e-11,4.166e-11,1.171e-10,2.044e-10,3.934e-10,4.653e-10,6.108e-10,6.108e-10,7.867e-10,1.966e-09,1.187e-08,2.747e-08	X_5658332_SNP,X_5658440_SNP,X_5658252_SNP,X_5658253_SNP,X_5658776_SNP,X_5657251_SNP,X_5656315_SNP,X_5658279_SNP,X_5658522_SNP,X_5657758_SNP,X_5657498_SNP,X_5657431_SNP,X_5657778_SNP,X_5657835_DEL,X_5663764_SNP,X_5661124_SNP,X_5666712_SNP,X_5666734_SNP,X_5666726_SNP,X_5657982_DEL,X_5666271_SNP,X_5662721_SNP,X_5661118_SNP,X_5663471_SNP,X_5661295_SNP,X_5663441_SNP,X_5667809_SNP,X_5667838_SNP,X_56610…	3.77e-12,8.062e-12,8.301e-12,8.301e-12,8.301e-12,8.705e-12,8.788e-12,9.177e-12,9.696e-12,1.375e-11,1.601e-11,5.785e-11,6.819e-11,9.516e-11,1.061e-10,1.418e-10,4.923e-10,6.048e-10,6.6e-10,7.296e-10,9.825e-10,3.382e-09,4.397e-09,4.545e-09,4.745e-09,5.122e-09,5.332e-09,5.332e-09,1.91e-08,3.525e-08,3.993e-08,4.817e-08,5.068e-08,7.829e-08,8.532e-08,9.245e-08,1.131e-07,1.202e-07,2.131e-07,2.343e-07,2.7…	3L_10249551_SNP	4.679e-08
FBgn0029813	X	5708897	5709853	-	X_5709829_SNP(cis)	X_5709829_SNP,X_5709889_SNP	2.186e-11,2.616e-10
FBgn0029820	X	5773902	5777424	+	X_5774795_SNP(cis)	X_5774795_SNP,X_5774605_DEL	5.817e-12,1.394e-11
FBgn0029826	X	5842193	5844241	+	X_5842908_SNP(cis)	X_5842908_SNP	3.227e-12
FBgn0029838	X	5970105	5971819	-	X_5971421_SNP(cis)	X_5971421_SNP,X_5971407_SNP	1.741e-12,3.99e-12
FBgn0029848	X	6111301	6113360	-	X_6113340_DEL(cis)	X_6113319_SNP,X_6113340_DEL,X_6113655_SNP,X_6113707_SNP,X_6113291_SNP,X_6113027_SNP,X_6112995_SNP,X_6112947_SNP,X_6113361_SNP	2.511e-23,2.914e-23,2.533e-19,4.214e-17,1.01e-16,1.201e-12,8.313e-12,2.727e-11,4.749e-09			2L_1591042_SNP,2L_1590869_SNP,2L_1590925_SNP,2L_1591043_SNP	6.208e-09,6.617e-09,7.321e-09,7.837e-09
FBgn0029878	X	6484809	6490987	+	X_6490536_SNP(cis)	X_6490536_SNP,X_6490696_SNP	3.284e-46,1.374e-08
FBgn0029903	X	6697717	6707863	+	X_6706451_INS(trans-intra-arm)			X_6706478_SNP,X_6706451_INS,X_6706288_SNP,X_6706390_SNP,X_6706339_SNP	2.069e-11,8.144e-11,8.583e-10,1.241e-09,1.725e-09
FBgn0029906	X	6715049	6716873	+	X_6714026_SNP(trans-intra-arm),X_6716371_SNP(cis)	X_6714119_SNP,X_6714583_SNP,X_6714056_SNP,X_6714070_SNP,X_6715198_SNP,X_6715039_SNP,X_6715003_SNP,X_6715037_SNP,X_6715393_SNP,X_6715065_SNP,X_6716652_SNP,X_6716484_SNP,X_6716371_SNP,X_6714718_SNP	8.063e-16,1.935e-14,2.67e-14,8.524e-14,2.282e-12,3.813e-12,8.101e-11,2.166e-10,2.182e-10,3.948e-10,7.465e-09,1.193e-08,1.414e-08,2.212e-07	X_6714026_SNP,X_6713987_SNP,X_6713981_SNP,X_6713684_SNP	1.047e-18,5.864e-17,1.843e-14,1.925e-09	2R_17663234_SNP,2R_17663223_SNP	4.109e-07,4.229e-07
FBgn0029914	X	6743803	6745917	+	X_6745239_SNP(cis)	X_6745241_DEL,X_6745239_SNP	7.542e-09,9.273e-09
FBgn0029925	X	6866357	6867426	-	X_6867426_INS(cis)	X_6867426_INS,X_6867530_SNP,X_6867360_SNP,X_6867448_SNP	2.06e-10,9.857e-10,1.498e-09,5.339e-08
FBgn0029928	X	6906272	6907914	-	3L_17092590_SNP(trans-inter-arm)					3L_17092590_SNP	6.522e-09
FBgn0029937	X	6998918	7000378	+	X_6998884_SNP(cis)	X_6998826_SNP,X_6998822_SNP,X_6998884_SNP,X_6998833_DEL,X_6998849_INS	2.194e-13,7.725e-13,1.234e-12,1.359e-12,5.035e-12	X_6997713_SNP,X_6996759_SNP	1.033e-08,5.38e-08	3R_23965219_SNP	1.761e-07
FBgn0029942	X	7180391	7182150	+	2R_17375617_SNP(trans-inter-arm)					2R_17375617_SNP	3.938e-12
FBgn0029958	X	7625812	7628684	-	X_7628088_SNP(cis)	X_7628088_SNP	6.01e-11
FBgn0029959	X	7628956	7630789	+	X_7630609_SNP(cis)	X_7630609_SNP	1.174e-09
FBgn0029970	X	7783099	7785679	-	2R_9775493_SNP(trans-inter-arm)					2R_9775493_SNP	4.314e-13
FBgn0029990	X	7929774	7931550	-	X_7931590_SNP(cis),3R_25613985_SNP(trans-inter-arm)	X_7931590_SNP,X_7931592_DEL	5.388e-13,1.362e-11			3R_25613985_SNP	5.61e-09
FBgn0030006	X	8036583	8037868	-	X_8036401_DEL(cis)	X_8036401_DEL,X_8036898_SNP,X_8037501_SNP,X_8036505_SNP	1.453e-11,1.792e-10,5.804e-09,3.645e-08	X_8034125_SNP	3.429e-09	3L_9768407_SNP	3.406e-08
FBgn0030011	X	8044764	8046308	-	X_8046458_DEL(cis)	X_8046472_SNP,X_8046458_DEL	2.204e-12,3.004e-11
FBgn0030026	X	8135534	8138049	-	X_8137256_SNP(cis)	X_8137256_SNP	1.247e-14
FBgn0030038	X	8331090	8335297	+	X_8335006_SNP(cis)	X_8335006_SNP	2.228e-12
FBgn0030041	X	8361476	8363045	-	X_1464885_SNP(trans-intra-arm)			X_1464885_SNP	1.285e-08
FBgn0030048	X	8452912	8454225	-	X_8453348_SNP(cis)	X_8453348_SNP	5.466e-14
FBgn0030065	X	8732356	8766807	+	2L_11672262_SNP(trans-inter-arm)					2L_11672262_SNP,2L_11672016_SNP,2L_11672263_SNP,2L_11672015_SNP,2L_11672008_SNP,2L_11672285_SNP,2L_11671963_SNP,2L_11671975_SNP	6.45e-09,1.104e-08,1.626e-08,2.188e-08,4.611e-08,4.876e-08,6.288e-08,8.928e-08
FBgn0030067	X	8795732	8797794	+	X_8797412_SNP(cis)	X_8797412_SNP	3.116e-11
FBgn0030071	X	8816921	8817720	-	3L_19235734_SNP(trans-inter-arm)					3L_19235734_SNP	1.075e-10
FBgn0030089	X	9002724	9011777	+	X_9008599_SNP(trans-intra-arm),3R_22182767_DEL(trans-inter-arm)	X_9011995_SNP	2.382e-08	X_9008599_SNP,X_9008663_SNP,X_9008901_SNP,X_9008826_SNP,X_9008581_SNP,X_9010238_SNP,X_9009267_SNP,X_9010048_SNP,X_9010148_SNP,X_9010170_SNP,X_9009477_SNP,X_9010149_INS,X_9009769_SNP,X_9009786_SNP,X_9009785_SNP,X_9009771_SNP	2.818e-12,5.427e-11,1.944e-10,1.95e-10,1.512e-09,2.699e-09,3.883e-09,1.252e-07,1.726e-07,1.762e-07,2.192e-07,2.283e-07,2.592e-07,2.753e-07,2.854e-07,3.005e-07	3R_22182767_DEL,3R_22182763_SNP	2.288e-07,2.492e-07
FBgn0030092	X	9042113	9043104	-	X_9041989_DEL(cis)	X_9041989_DEL,X_9042055_SNP,X_9042059_SNP,X_9042046_SNP,X_9041966_INS	1.719e-08,5.361e-08,5.868e-08,7.606e-08,8.682e-08
FBgn0030098	X	9085690	9086581	+	X_9085556_SNP(cis)	X_9085556_SNP	2.758e-21
FBgn0030103	X	9108909	9109732	+	X_9108914_DEL(cis)	X_9108914_DEL	3.495e-22
FBgn0030105	X	9110905	9111499	+	X_9110792_SNP(cis)	X_9110792_SNP,X_9110757_SNP	8.075e-11,1.486e-10
FBgn0030156	X	9768526	9770705	-	X_9769637_SNP(trans-intra-arm)	X_9768637_SNP	3.219e-08	X_9769637_SNP	1.103e-09
FBgn0030163	X	9857486	9858911	-	3R_12875492_SNP(trans-inter-arm)					3R_12875492_SNP,3R_12873708_SNP,3R_12866173_SNP,3R_12874905_SNP,3R_12873702_SNP,3R_12873703_SNP,3R_12875034_SNP,3R_12872976_SNP,3R_12874782_SNP,3R_12875453_SNP,3R_12875520_SNP,3R_12875529_SNP,3R_12868126_SNP,3R_12874886_SNP,3R_12873560_SNP,3R_12869051_SNP,3R_12875518_SNP,3R_12876888_SNP,3R_12873780_SNP,3R_12865965_DEL,3R_12872450_SNP,3R_12876924_SNP,3R_12882685_SNP,3R_12873865_SNP,3R_12876847_SNP…	4.595e-16,5.771e-16,6.193e-16,6.533e-16,7.089e-16,7.291e-16,1.284e-15,1.682e-15,1.729e-15,2.486e-15,2.486e-15,2.486e-15,3.214e-15,3.419e-15,3.744e-15,8.477e-15,1.233e-14,2.132e-14,4.623e-14,7.263e-14,1.591e-13,2.51e-13,1.232e-12,1.246e-12,1.259e-12,1.592e-12,1.916e-12,4.861e-12,5.519e-12,6.976e-11,1.694e-10,1.058e-09,2.263e-09,3.331e-09,6.14e-09,8.004e-09,9.04e-09,2.354e-08,3.116e-08,6.407e-08,1.…
FBgn0030178	X	9978947	9980204	-	X_9979727_SNP(cis),3L_4718295_SNP(trans-inter-arm),X_13005642_SNP(trans-intra-arm)	X_9979727_SNP,X_9979646_SNP,X_9979760_SNP,X_9980242_SNP,X_9979913_SNP,X_9980259_SNP,X_9980277_SNP,X_9979586_SNP,X_9980291_SNP,X_9980307_SNP	3.173e-13,9.404e-11,3.986e-10,4.303e-10,4.317e-09,1.308e-08,1.327e-08,1.065e-07,1.486e-07,3.705e-07	X_9982257_SNP,X_9982198_DEL,X_13005642_SNP,X_9982272_SNP,X_9981264_SNP,X_9982798_SNP	3.718e-08,1.1e-07,1.221e-07,1.509e-07,1.939e-07,3.055e-07	3L_4718295_SNP	3.373e-07
FBgn0030208	X	10372871	10375976	+	X_10372262_SNP(cis),3L_10750673_SNP(trans-inter-arm),2L_3329448_SNP(trans-inter-arm)	X_10372262_SNP,X_10372259_SNP,X_10376416_SNP,X_10376422_SNP,X_10376184_SNP,X_10373626_SNP,X_10373620_SNP,X_10373761_SNP,X_10373539_SNP,X_10375227_SNP,X_10375764_SNP,X_10375168_SNP	8.362e-09,2.354e-08,8.936e-08,1.216e-07,1.489e-07,2.313e-07,2.46e-07,3.127e-07,4.58e-07,5.445e-07,5.851e-07,6.466e-07	X_10380915_DEL,X_10381505_SNP,X_10378361_SNP,X_10378377_SNP,X_10381582_SNP,X_10374850_SNP,X_10377025_SNP,X_10374961_SNP,X_10377109_SNP,X_10374196_SNP,X_10380912_SNP,X_10380324_SNP,X_10378478_SNP,X_10380989_SNP,X_10381521_SNP,X_10374916_SNP	4.88e-08,4.886e-08,5.013e-08,5.468e-08,7.031e-08,7.364e-08,9.243e-08,9.331e-08,1.19e-07,1.293e-07,1.534e-07,3.26e-07,3.673e-07,4.614e-07,5.164e-07,5.923e-07	2L_3329448_SNP,3L_10750673_SNP	1.089e-07,1.404e-07
FBgn0030240	X	10742790	10746360	+	X_10746230_SNP(cis)	X_10746230_SNP	1.36e-15
FBgn0030274	X	11043356	11046625	+	X_11043708_SNP(cis),2L_8121075_SNP(trans-inter-arm)	X_11043708_SNP	1.662e-10			2L_8121075_SNP	4.598e-08
FBgn0030286	X	11219418	11228104	+	X_11225811_SNP(trans-intra-arm)			X_11225811_SNP,X_11226214_SNP,X_11225931_SNP,X_11225976_SNP	5.295e-09,5.031e-08,6.922e-08,1.14e-07
FBgn0030332	X	11657507	11658623	-	X_11658796_SNP(cis)	X_11658796_SNP,X_11659510_SNP,X_11659597_SNP	6.062e-19,2.896e-10,2.466e-09	X_11659662_SNP	5.284e-08
FBgn0030347	X	11767352	11769379	+	X_11767477_SNP(cis)	X_11767477_SNP,X_11768740_SNP,X_11769504_SNP,X_11769401_SNP,X_11769501_SNP,X_11769459_SNP,X_11769422_SNP,X_11769369_SNP,X_11769583_SNP	8.907e-28,3.719e-15,2.425e-10,1.394e-08,1.941e-08,2.528e-08,3.657e-08,6.695e-08,8.093e-08
FBgn0030348	X	11769339	11771201	-	X_11771250_SNP(cis),X_11771479_SNP(cis)	X_11771250_SNP,X_11771479_SNP,X_11771551_SNP,X_11771437_SNP,X_11771438_SNP,X_11771323_SNP,X_11771134_SNP,X_11771316_SNP,X_11771334_SNP,X_11771325_SNP,X_11771116_SNP,X_11770210_SNP,X_11770278_SNP,X_11770276_SNP	1.746e-21,1.718e-16,1.795e-14,6.576e-12,6.917e-12,3.886e-10,3.871e-09,9.863e-09,1.01e-08,1.222e-08,2.266e-08,3.269e-08,4.849e-08,7.222e-08
FBgn0030349	X	11771770	11781195	-	X_11777395_SNP(trans-intra-arm)			X_11777395_SNP,X_11777386_SNP	1.467e-09,1.514e-09
FBgn0030357	X	11814037	11818695	-	X_11816532_SNP(trans-intra-arm)			X_11816532_SNP	1.868e-10
FBgn0030407	X	12505900	12509563	+	X_12505903_SNP(cis)	X_12505804_SNP,X_12505794_SNP,X_12505903_SNP,X_12506032_SNP,X_12505780_SNP,X_12506180_SNP,X_12505792_SNP,X_12505788_SNP,X_12506081_SNP,X_12505918_SNP,X_12506087_SNP,X_12505946_SNP,X_12505789_SNP,X_12506082_SNP,X_12505760_SNP,X_12505721_SNP,X_12505692_DEL,X_12505769_SNP,X_12505032_SNP,X_12505678_SNP,X_12505128_SNP,X_12505650_SNP	1.194e-10,2.062e-10,2.559e-10,2.737e-10,5.373e-10,5.978e-10,3.917e-09,5.353e-09,6.534e-09,6.964e-09,1.04e-08,1.332e-08,1.457e-08,1.904e-08,2.157e-08,2.402e-08,5.008e-08,5.97e-08,1.371e-07,3.686e-07,6.207e-07,6.391e-07	X_12504804_SNP,X_12504801_SNP,X_12504699_SNP,X_12504585_SNP,X_12504688_SNP,X_12504789_SNP	3.2e-08,6.057e-08,9.807e-08,1.27e-07,1.967e-07,2.389e-07
FBgn0030431	X	12795386	12797549	-	X_12797576_SNP(cis)	X_12797576_SNP,X_12795627_SNP,X_12798505_SNP,X_12795385_SNP,X_12795454_SNP,X_12798502_SNP,X_12795057_SNP,X_12795062_SNP,X_12795657_SNP,X_12798262_SNP,X_12795961_SNP,X_12795967_DEL,X_12795964_SNP,X_12798013_SNP,X_12795950_SNP,X_12795837_SNP,X_12796022_SNP,X_12797947_SNP,X_12795852_SNP,X_12795864_SNP,X_12797940_SNP,X_12797911_SNP,X_12796030_SNP,X_12795918_SNP,X_12797667_SNP,X_12797558_SNP,X_1279459…	3.106e-23,9.867e-23,1.002e-20,9.559e-19,3.226e-18,1.277e-17,4.855e-17,8.657e-17,1.275e-13,3.871e-13,8.208e-12,1.101e-11,1.21e-11,1.665e-11,1.785e-11,1.836e-11,1.93e-11,2.738e-11,2.802e-11,3.161e-11,3.602e-11,4.725e-11,5.144e-11,6.661e-11,7.312e-11,7.781e-11,9.635e-11,9.845e-11,1.121e-10,1.465e-10,2.125e-10,2.356e-10,3.885e-10,7.017e-10,8.614e-10,9.15e-10,9.495e-10,1.631e-09,2.042e-09,1.736e-08	X_12798703_SNP,X_12799222_SNP,X_12798568_SNP,X_12798682_SNP,X_12798688_SNP,X_12798790_SNP,X_12806846_SNP,X_12806692_SNP,X_12791970_SNP,X_12792690_SNP,X_12792717_SNP,X_12792638_SNP,X_12792583_SNP,X_12792585_SNP,X_12791958_SNP,X_12791973_SNP,X_12807356_SNP,X_12792668_SNP,X_12788911_SNP	4.64e-23,1.79e-20,9.114e-19,4.327e-18,5.348e-16,8.379e-16,6.795e-13,3.436e-11,1.536e-10,3.804e-10,8.725e-10,1.008e-09,1.558e-09,1.558e-09,1.737e-09,4.366e-09,8.34e-09,4.195e-08,1.723e-07	2R_6171510_SNP,2L_18896534_SNP	1.631e-08,5.39e-08
FBgn0030432	X	12797778	12800051	-	X_12799668_SNP(cis)	X_12799668_SNP,X_12799563_SNP,X_12799834_SNP,X_12799498_SNP,X_12799562_SNP,X_12799488_SNP,X_12799983_SNP,X_12799598_SNP	9.427e-12,1.062e-10,1.306e-10,1.671e-10,3.397e-10,1.226e-09,1.833e-09,3.6e-09
FBgn0030435	X	12803986	12806103	+	X_12805896_SNP(cis)	X_12805896_SNP,X_12805643_SNP	1.401e-12,1.204e-11
FBgn0030451	X	13022985	13028598	+	2L_22305113_SNP(trans-inter-arm),X_13021642_SNP(trans-intra-arm)	X_13022196_SNP,X_13022000_SNP,X_13023092_SNP	1.434e-09,2.011e-09,2.506e-07	X_13021642_SNP,X_13021624_SNP,X_13026314_SNP,X_13020819_SNP	1.691e-09,1.858e-09,4.45e-08,8.353e-07	2L_22305113_SNP,2L_22279247_SNP,2L_22434671_SNP,2L_22313082_INS,2L_22314906_SNP,2L_22290788_SNP,2L_22263127_SNP,2L_22278835_INS,2L_22294586_SNP,2L_22290338_SNP,2L_22305487_SNP,2L_22277534_SNP,2L_22261346_SNP,2L_22249858_SNP,2L_22249735_SNP,2L_22264837_SNP,2L_22306779_SNP,2L_22306995_SNP,2L_22314462_SNP,2L_22312360_SNP,2L_22277620_SNP,2L_22261319_DEL,2L_22299955_SNP,2L_22257777_SNP,2L_22296801_SNP…	2.97e-10,1.728e-09,2.267e-09,3.799e-09,4.506e-09,6.047e-09,6.994e-09,1.012e-08,1.579e-08,1.694e-08,1.75e-08,1.94e-08,2.022e-08,2.324e-08,2.381e-08,2.578e-08,2.767e-08,2.809e-08,4.515e-08,5.497e-08,5.895e-08,6.507e-08,7.318e-08,7.941e-08,8.207e-08,8.497e-08,8.851e-08,8.866e-08,9.756e-08,9.772e-08,1.353e-07,1.515e-07,1.933e-07,2.19e-07,2.277e-07,2.656e-07,3.872e-07,3.872e-07,3.872e-07,4.036e-07,4.1…
FBgn0030481	X	13281596	13283365	+	X_18827669_INS(trans-intra-arm)			X_18827669_INS	7.943e-09
FBgn0030485	X	13303402	13307107	-	3L_9263730_SNP(trans-inter-arm)					3L_9263730_SNP	3.388e-08
FBgn0030511	X	13576985	13578649	+	X_13576817_INS(cis)	X_13576817_INS	1.012e-14
FBgn0030551	X	14118680	14119912	-	X_14119848_SNP(cis)	X_14119848_SNP,X_14119923_SNP,X_14119792_SNP	1.316e-10,3.195e-10,1.067e-08
FBgn0030581	X	14720900	14726066	-	X_14721735_SNP(cis)	X_14721735_SNP,X_14721814_SNP,X_14721792_DEL,X_14721654_SNP,X_14720630_SNP,X_14720557_SNP,X_14720536_SNP,X_14720541_SNP,X_14720534_SNP,X_14720285_SNP,X_14720445_SNP,X_14720438_SNP,X_14720475_SNP,X_14721183_SNP,X_14720765_SNP,X_14720400_SNP	7.724e-14,6.648e-13,2.864e-12,8.029e-12,1.618e-11,1.301e-09,1.544e-09,1.766e-09,4.129e-09,1.505e-08,1.516e-08,1.692e-08,2.077e-08,2.717e-08,1.519e-07,1.863e-07	X_14722499_SNP,X_14730646_SNP	2.634e-13,1.985e-07	2R_7886366_SNP	2.103e-07
FBgn0030582	X	14726680	14730295	+	X_14727030_SNP(cis),X_8005547_SNP(trans-intra-arm)	X_14727030_SNP,X_14727087_SNP,X_14727213_SNP,X_14727219_INS,X_14726282_SNP,X_14726681_SNP,X_14726341_SNP	6.329e-15,6.515e-13,4.48e-12,7.584e-12,8.813e-11,1.885e-10,2.034e-09	X_8005547_SNP	7.881e-08
FBgn0030588	X	14745038	14747302	-	3R_18912494_SNP(trans-inter-arm)					3R_18912494_SNP	7.77e-10
FBgn0030594	X	14800367	14803741	-	X_14803104_SNP(cis)	X_14803104_SNP	2.279e-18
FBgn0030598	X	14813285	14817526	-	X_14817553_SNP(cis)	X_14817553_SNP	8.342e-14
FBgn0030615	X	15007335	15010575	-	X_15010556_SNP(cis),3L_1949694_INS(trans-inter-arm)	X_15010532_SNP,X_15010674_SNP,X_15011462_SNP,X_15011491_SNP,X_15010556_SNP,X_15011271_SNP,X_15011140_SNP,X_15011171_SNP,X_15011135_INS,X_15011141_SNP,X_15011158_SNP,X_15011091_SNP,X_15011105_SNP,X_15011115_INS,X_15011146_SNP,X_15011109_SNP,X_15011086_SNP,X_15010230_SNP,X_15009834_SNP,X_15010140_SNP,X_15010092_DEL,X_15010098_DEL,X_15010120_DEL,X_15010126_SNP,X_15010129_SNP,X_15007499_SNP,X_1501105…	1.751e-14,1.864e-14,5.287e-14,6.411e-14,7.256e-14,1.573e-13,1.955e-13,2.985e-13,4.02e-13,4.02e-13,4.522e-13,4.57e-13,4.57e-13,4.57e-13,4.689e-13,5.444e-13,5.863e-13,1.31e-12,2.124e-12,2.281e-12,2.303e-12,2.303e-12,2.303e-12,2.31e-12,2.629e-12,2.89e-12,3.407e-12,3.685e-12,4.04e-12,4.156e-12,4.906e-12,4.995e-12,8.441e-12,1.104e-11,1.174e-11,1.482e-11,2.411e-11,2.786e-11,3.223e-11,3.381e-11,3.517e-1…	X_15009472_SNP,X_15009440_SNP,X_15009510_SNP,X_15008963_SNP,X_15008658_SNP,X_15008747_SNP,X_15008514_SNP,X_15008513_SNP,X_15008501_SNP,X_15008442_SNP,X_15008387_SNP,X_15008598_SNP,X_15009161_SNP,X_15008744_SNP,X_15012711_SNP,X_15008614_SNP,X_15008580_SNP,X_15005894_SNP,X_15014091_SNP,X_15012895_SNP,X_15008480_SNP,X_15014371_DEL,X_15014382_SNP,X_15013158_SNP,X_15014352_SNP,X_15014353_DEL,X_1500848…	2.501e-13,3.526e-13,6.437e-13,2.992e-12,3.146e-12,6.19e-12,1.229e-11,1.536e-11,1.931e-11,2.268e-11,3.821e-11,5.451e-11,5.957e-11,8.129e-11,5.735e-10,4.376e-09,5.201e-09,8.807e-09,1.419e-08,1.496e-08,1.804e-08,2.517e-08,2.921e-08,2.985e-08,3.122e-08,3.122e-08,3.452e-08,3.625e-08,3.926e-08,4.388e-08,4.625e-08,6.5e-08,6.966e-08,7.487e-08,7.639e-08,7.686e-08,9.911e-08,1.461e-07,1.497e-07,1.572e-07,1.…	2L_18589851_SNP,3L_1949694_INS,2L_18580605_SNP,2L_18589545_SNP	6.568e-07,8.351e-07,8.784e-07,1.116e-06
FBgn0030628	X	15224817	15227187	-	X_15227376_SNP(cis),3L_14678254_SNP(trans-inter-arm)	X_15227376_SNP,X_15227105_SNP,X_15226981_SNP,X_15227465_SNP,X_15226498_SNP,X_15226478_SNP	1.054e-10,5.219e-10,5.565e-10,1.19e-09,7.189e-09,1.416e-07	X_15229540_SNP,X_15234608_DEL,X_15234619_SNP,X_15234620_SNP,X_15222738_SNP,X_15222735_SNP,X_15222737_SNP	8.552e-10,5.729e-08,1.191e-07,1.572e-07,2.983e-07,3.704e-07,3.762e-07	3L_14678254_SNP	3.066e-07
FBgn0030629	X	15234406	15236150	-	X_15234620_SNP(cis)	X_15234619_SNP,X_15234620_SNP,X_15234608_DEL,X_15236225_INS	7.209e-14,7.914e-14,1.286e-13,5.128e-12	X_15226981_SNP,X_15227376_SNP,X_15227465_SNP,X_15243571_SNP	5.77e-11,9.73e-11,4.07e-10,4.978e-10
FBgn0030662	X	15479322	15487567	-	X_15484236_SNP(trans-intra-arm)			X_15484236_SNP,X_15484173_SNP,X_15484368_SNP	1.776e-14,3.072e-13,2.819e-08
FBgn0030670	X	15595484	15597803	-	3L_16028429_SNP(trans-inter-arm)					3L_16028429_SNP	1.833e-08
FBgn0030724	X	15964398	15967601	-	3R_26331316_SNP(trans-inter-arm)					3R_26331316_SNP	5.925e-08
FBgn0030746	X	16293815	16299155	-	X_16298438_DEL(cis)	X_16298438_DEL,X_16298520_SNP,X_16298508_SNP	4.714e-35,1.397e-08,2.258e-08			2L_16967534_SNP,3L_9446903_SNP	2.635e-08,3.078e-08
FBgn0030761	X	16489169	16493248	-	X_16490626_SNP(trans-intra-arm),3L_8095974_SNP(trans-inter-arm)	X_16492409_SNP,X_16490044_SNP,X_16490156_SNP,X_16490065_SNP,X_16489288_SNP,X_16489917_SNP	7.004e-10,7.032e-09,3.648e-08,3.9e-08,5.807e-08,6.274e-08	X_16490626_SNP,X_16491250_SNP,X_16490908_SNP,X_16491436_SNP,X_16490731_SNP,X_16491331_SNP,X_12654884_SNP	4.654e-12,1.037e-11,2.926e-11,4.904e-11,8.205e-10,8.811e-10,3.058e-08	3L_8095974_SNP	5.11e-08
FBgn0030769	X	16562851	16570786	-	X_16569601_SNP(trans-intra-arm)			X_16569601_SNP,X_16569585_SNP	6.714e-11,3.469e-08
FBgn0030777	X	16600004	16600907	-	X_16600953_SNP(cis)	X_16600953_SNP	4.24e-12
FBgn0030788	X	16681316	16683677	+	X_16682817_SNP(cis),3L_21762552_SNP(trans-inter-arm)	X_16682899_SNP,X_16682817_SNP,X_16682901_DEL	1.37e-10,1.418e-10,4.507e-08	X_16679459_SNP	7.506e-09	3L_21762552_SNP	3.209e-08
FBgn0030793	X	16695962	16697377	-	X_16697626_SNP(cis)	X_16697626_SNP,X_16697589_SNP,X_16697782_DEL,X_16697730_SNP,X_16697821_SNP,X_16697731_SNP,X_16697935_SNP,X_16697408_SNP	5.588e-11,7.334e-10,1.251e-09,1.504e-09,2.005e-09,2.28e-09,1.192e-08,2.662e-08
FBgn0030794	X	16697683	16699787	+	X_16697782_DEL(cis),X_16697298_SNP(cis)	X_16697782_DEL,X_16697731_SNP,X_16697730_SNP,X_16697821_SNP,X_16697935_SNP,X_16698057_SNP,X_16697589_SNP,X_16697408_SNP,X_16697567_DEL,X_16697492_SNP,X_16697298_SNP,X_16697873_SNP,X_16698512_SNP,X_16697626_SNP,X_16697324_SNP,X_16697325_SNP	1.361e-14,2.386e-13,2.691e-13,5.58e-13,8.778e-13,3.896e-12,6.055e-12,6.206e-09,8.021e-09,9.839e-09,1.244e-08,1.582e-08,2.01e-08,2.888e-08,6.077e-08,6.702e-08
FBgn0030800	X	16776542	16778398	-	X_16777684_SNP(cis)	X_16777684_SNP	1.972e-10
FBgn0030808	X	16837323	16850267	+	2R_17973101_SNP(trans-inter-arm)					2R_17973101_SNP	2.671e-09
FBgn0030816	X	16985887	16992521	+	X_16987006_SNP(trans-intra-arm)			X_16987006_SNP,X_16987300_SNP,X_16987018_SNP	4.229e-10,2.468e-08,3.673e-08
FBgn0030828	X	17109337	17111398	+	X_17109038_SNP(cis)	X_17109038_SNP,X_17108481_SNP,X_17109518_SNP,X_17110228_DEL,X_17109304_SNP,X_17110225_SNP,X_17110206_SNP,X_17109723_SNP	3.443e-35,9.147e-19,3.639e-16,5.793e-16,5.57e-14,1.808e-13,6.35e-13,8.686e-12	X_17107995_SNP,X_17108057_SNP,X_17108152_SNP,X_17107913_SNP,X_17108205_SNP,X_17105195_SNP,X_17104792_SNP,X_17102718_SNP,X_17102769_SNP,X_17102729_SNP,X_17102547_SNP	2.161e-29,5.07e-29,1.061e-28,4.172e-20,2.145e-17,5.236e-16,2.636e-15,5.156e-12,1.328e-10,4.027e-10,6.362e-10	3R_14532342_SNP	1.282e-10
FBgn0030863	X	17592950	17597057	-	X_7861331_INS(trans-intra-arm)			X_7861331_INS	1.608e-08
FBgn0030876	X	17751007	17752643	+	X_17750691_DEL(cis)	X_17750691_DEL	6.251e-14
FBgn0030890	X	17972524	17982565	-	X_17974597_SNP(trans-intra-arm),X_3614219_SNP(trans-intra-arm)			X_17974597_SNP,X_3614219_SNP,X_17974561_SNP,X_3609504_SNP,X_3609358_SNP,X_3612688_SNP,X_3610392_SNP,X_3614191_SNP,X_3609722_SNP,X_3610230_SNP,X_3608218_SNP,X_3610662_SNP,X_3609807_INS,X_3610537_SNP,X_3613994_SNP,X_3610756_SNP,X_3609828_SNP,X_3608208_SNP,X_3611313_SNP,X_3608291_SNP,X_3608283_SNP,X_3610736_SNP,X_3610259_SNP,X_3610238_SNP	9.376e-09,1.086e-08,2.031e-08,2.951e-08,4.017e-08,4.035e-08,4.86e-08,5.233e-08,8.499e-08,8.808e-08,9.2e-08,1.048e-07,1.314e-07,1.421e-07,1.793e-07,1.826e-07,2.448e-07,2.687e-07,2.728e-07,2.883e-07,3.171e-07,3.405e-07,3.535e-07,4.164e-07
FBgn0030912	X	18208157	18215226	-	X_18214893_DEL(cis),X_18212757_SNP(trans-intra-arm),X_8839240_SNP(trans-intra-arm)	X_18214497_SNP,X_18214378_SNP,X_18214814_SNP,X_18215510_SNP,X_18214893_DEL,X_18216118_SNP,X_18207910_SNP,X_18207916_SNP,X_18207926_SNP,X_18207967_SNP,X_18207986_SNP,X_18214878_SNP,X_18207990_SNP,X_18215943_SNP,X_18207862_SNP,X_18215848_SNP,X_18207933_INS,X_18215809_INS	1.005e-21,1.02e-20,3.984e-18,1.598e-16,1.792e-16,2.25e-10,3.457e-10,9.128e-10,1.152e-09,1.152e-09,1.152e-09,1.163e-09,1.268e-09,2.932e-09,3.108e-09,3.749e-09,7.336e-09,8.648e-08	X_18213811_SNP,X_18213036_SNP,X_18212096_DEL,X_18213695_SNP,X_18214221_SNP,X_18213983_SNP,X_18213998_SNP,X_18211982_SNP,X_18212342_SNP,X_18212238_SNP,X_18212689_SNP,X_18212648_SNP,X_18211947_SNP,X_18212580_SNP,X_18213847_SNP,X_18211679_SNP,X_18202615_SNP,X_18211388_SNP,X_18222051_SNP,X_18217718_SNP,X_18202924_SNP,X_18212757_SNP,X_18211008_SNP,X_18209212_SNP,X_18210865_SNP,X_18217553_SNP,X_1821791…	6.829e-22,7.762e-21,8.45e-21,1.384e-20,1.503e-20,1.517e-19,1.553e-19,6.297e-19,8.266e-19,1.504e-18,1.322e-17,2.111e-17,3.462e-17,9.404e-17,3.894e-16,3.616e-14,2.597e-13,4.011e-13,1.744e-11,6.173e-11,8.617e-11,1.789e-10,1.87e-10,1.959e-10,2.129e-10,6.325e-10,7.094e-10,8.336e-10,8.92e-10,1.114e-09,1.304e-09,1.381e-09,1.818e-09,1.831e-09,1.918e-09,2.024e-09,2.395e-09,2.395e-09,2.434e-09,4.249e-09,4.…	2L_10960379_SNP	1.632e-07
FBgn0030913	X	18216991	18250224	-	X_18219838_INS(trans-intra-arm)			X_18219838_INS,X_18219843_SNP	1.05e-09,2.419e-09
FBgn0030914	X	18252914	18256560	+	X_18256847_SNP(cis),X_18134295_SNP(trans-intra-arm)	X_18256874_SNP,X_18257168_SNP,X_18257441_INS,X_18256937_SNP,X_18256951_DEL,X_18256922_SNP,X_18257010_SNP,X_18256847_SNP,X_18256848_SNP,X_18257005_INS,X_18257551_SNP,X_18257180_SNP,X_18257530_SNP,X_18257521_SNP,X_18257200_SNP,X_18257232_SNP,X_18257215_SNP,X_18256170_SNP,X_18257195_SNP,X_18255735_SNP,X_18255631_INS,X_18253699_SNP,X_18256235_SNP,X_18255651_SNP,X_18255825_SNP,X_18253782_INS,X_1825378…	3.332e-13,3.673e-13,5.591e-13,8.499e-13,1.59e-12,1.766e-12,1.992e-12,3.456e-12,4.123e-12,5.956e-12,7.375e-12,9.039e-12,9.321e-12,3.167e-11,7.093e-11,7.161e-11,1.56e-10,2.555e-10,3.912e-10,2.153e-09,1.643e-08,2.401e-08,4.354e-08,7.967e-08,1.038e-07,1.291e-07,1.291e-07,1.677e-07,1.809e-07,1.835e-07,2.836e-07,3.051e-07,3.405e-07,3.748e-07,3.904e-07,4.13e-07,4.203e-07,4.45e-07,5.764e-07,8.37e-07,1.08…	X_18255489_SNP,X_18257673_SNP,X_18255029_SNP,X_18254739_SNP,X_18254902_SNP,X_18255020_SNP,X_18254623_SNP,X_18254829_SNP,X_18254971_SNP,X_18134206_SNP,X_18134330_SNP,X_18251752_SNP,X_18134295_SNP,X_18257566_SNP	3.142e-10,8.383e-09,2.067e-08,2.933e-08,5.076e-08,6.96e-08,7.61e-08,1.592e-07,1.853e-07,3.831e-07,5.146e-07,1.185e-06,1.201e-06,1.285e-06	2R_5946820_SNP,3R_10175088_SNP,3R_10175085_INS,3R_10170946_SNP	4.017e-07,6.328e-07,7.526e-07,1.284e-06
FBgn0030925	X	18374016	18377805	-	X_21140674_SNP(trans-intra-arm)			X_21140674_SNP	1.299e-08
FBgn0030928	X	18385218	18386039	-	X_18393704_SNP(trans-intra-arm)			X_18393704_SNP	1.92e-09
FBgn0030960	X	18685701	18687550	+	X_18687442_SNP(cis)	X_18687442_SNP	1.707e-22
FBgn0030981	X	18975698	18976599	+	X_18973317_SNP(trans-intra-arm)			X_18973196_SNP,X_18973317_SNP,X_18973403_SNP	4.065e-10,2.64e-09,1.034e-08
FBgn0030984	X	19019036	19021349	-	X_19021395_SNP(cis)	X_19021395_SNP,X_19019428_SNP,X_19019689_SNP,X_19019181_DEL,X_19018364_SNP	1.412e-57,2.313e-56,2.89e-53,4.332e-50,6.187e-18	X_19022613_SNP,X_19013973_DEL,X_19023851_SNP,X_19025953_SNP,X_19012343_INS,X_19012347_SNP,X_19012330_SNP,X_19009974_SNP,X_19049964_SNP,X_19060132_SNP,X_19010290_SNP,X_15582681_SNP	6.019e-50,2.328e-23,8.637e-16,1.05e-11,9.304e-11,1.118e-10,2.084e-10,8.194e-10,1.469e-09,4.384e-09,5.178e-09,6.574e-09
FBgn0030990	X	19070142	19073863	-	X_19072676_SNP(trans-intra-arm)	X_19070982_SNP,X_19070999_SNP,X_19071017_SNP	8.023e-11,9.713e-11,4.593e-10	X_19072676_SNP,X_19072652_SNP,X_19072662_SNP,X_19072605_SNP,X_19072667_DEL,X_19072635_DEL	5.034e-11,2.7e-10,3.681e-10,6.432e-10,4.29e-09,7.601e-09
FBgn0031010	X	19171209	19174382	-	X_19174517_SNP(cis)	X_19174517_SNP	7.939e-12
FBgn0031018	X	19369096	19370088	+	X_19369101_SNP(cis)	X_19369101_SNP,X_19369035_INS	3.376e-19,4.478e-09
FBgn0031022	X	19387325	19388434	-	X_19387046_SNP(cis),2L_4211391_SNP(trans-inter-arm)	X_19387046_SNP,X_19387083_SNP,X_19387023_SNP,X_19388556_SNP,X_19389092_SNP,X_19389120_SNP,X_19388615_SNP,X_19388905_SNP,X_19388562_SNP,X_19389014_SNP,X_19389110_SNP	4.699e-10,1.509e-09,1.944e-09,5.749e-09,8.035e-09,1.206e-08,2.002e-08,7.163e-08,7.733e-08,9.889e-08,1.672e-07	X_19390757_SNP	3.286e-07	2L_4211391_SNP,2L_4211388_SNP	3.935e-08,1.447e-07
FBgn0031034	X	19486642	19489581	+	X_19486366_SNP(cis)	X_19486366_SNP,X_19486922_SNP,X_19487017_SNP,X_19486428_SNP,X_19486974_SNP,X_19486975_SNP,X_19487233_SNP	2.492e-12,1.363e-09,4.286e-09,1.054e-08,1.434e-08,2.013e-08,1.602e-07	X_19488026_SNP	1.502e-07
FBgn0031043	X	19515484	19517107	-	X_19516623_SNP(cis)	X_19516614_SNP,X_19516349_SNP,X_19516920_INS,X_19516623_SNP	5.178e-11,5.381e-11,9.127e-10,2.699e-09
FBgn0031049	X	19537360	19538551	+	X_19539051_SNP(cis)	X_19539051_SNP,X_19539084_SNP,X_19537568_SNP,X_19537531_SNP,X_19536496_SNP,X_19537454_DEL,X_19537267_SNP,X_19537251_SNP,X_19538393_SNP,X_19538433_SNP,X_19536404_SNP,X_19539525_SNP,X_19538368_SNP,X_19538382_SNP,X_19538398_SNP,X_19537713_SNP,X_19538396_INS,X_19539012_SNP,X_19537217_SNP,X_19538202_DEL,X_19537322_SNP,X_19537218_SNP,X_19536715_SNP,X_19538663_SNP,X_19539540_SNP,X_19538668_SNP,X_1953864…	1.122e-10,1.375e-10,3.516e-10,4.308e-10,4.333e-10,1.076e-09,1.762e-09,2.155e-09,2.204e-09,3.464e-09,7.048e-09,9.769e-09,1.045e-08,1.543e-08,2.348e-08,4.239e-08,4.423e-08,7.055e-08,8.562e-08,1.29e-07,1.549e-07,2.194e-07,2.937e-07,2.987e-07,3.227e-07,4.811e-07,9.164e-07,9.327e-07,9.435e-07,1.011e-06	X_19534977_INS,X_19535647_SNP,X_19536050_SNP,X_19536323_SNP,X_19534784_INS,X_19536319_SNP,X_19535438_SNP,X_19535614_SNP,X_19534523_SNP,X_19535531_DEL,X_19534695_SNP,X_19534705_SNP,X_19540102_SNP	6.237e-09,3.06e-08,3.267e-08,3.978e-08,7.291e-08,1.008e-07,1.113e-07,1.833e-07,1.996e-07,2.973e-07,5.128e-07,7.7e-07,8.951e-07	3L_9988316_INS,3L_5917926_SNP,2L_8392128_SNP	6.331e-07,9.901e-07,1.042e-06
FBgn0031053	X	19553475	19558004	-	X_19556100_SNP(trans-intra-arm)	X_19558259_SNP,X_19558962_SNP	1.737e-07,1.937e-07	X_19556100_SNP,X_19556078_SNP,X_19556112_SNP,X_19555109_SNP,X_19555115_SNP,X_19554872_SNP,X_19554875_SNP,X_19554642_SNP,X_19554644_SNP,X_19559879_SNP	5.077e-11,2.561e-10,3.173e-10,5.049e-10,7.608e-10,5.795e-09,8.627e-09,4.645e-08,6.699e-08,3.861e-07
FBgn0031069	X	19644803	19653313	+	X_19654452_SNP(trans-intra-arm)			X_19654452_SNP	6.812e-11
FBgn0031099	X	20125718	20128225	-	X_20128907_SNP(cis)	X_20128907_SNP,X_20128290_SNP,X_20126450_SNP,X_20128826_SNP,X_20129035_SNP,X_20128823_SNP	1.115e-16,2.209e-13,6.609e-11,3.178e-08,4.945e-08,6.314e-08	X_20130910_SNP,X_20130852_SNP,X_20130938_SNP,X_20131019_SNP,X_20130851_SNP,X_20123931_SNP,X_20137018_INS,X_20129697_SNP,X_20135064_SNP,X_20123770_SNP,X_20123977_SNP,X_20123744_INS,X_20123924_SNP,X_20129698_SNP,X_20135164_SNP,X_20129701_SNP,X_20131091_SNP,X_20131109_SNP,X_20123352_SNP,X_20130126_SNP	9.148e-16,3.289e-14,3.289e-14,3.289e-14,3.917e-14,6.523e-12,3.561e-11,3.706e-11,5.786e-11,1.242e-10,1.242e-10,1.319e-10,1.373e-10,1.858e-10,1.996e-10,2.449e-10,2.684e-10,2.684e-10,5.696e-10,7.408e-09
FBgn0031117	X	20338482	20340823	+	X_20339458_SNP(cis)	X_20339458_SNP	3.784e-08
FBgn0031126	X	20528149	20532452	+	2L_16785487_SNP(trans-inter-arm)					2L_16785487_SNP	1.121e-09
FBgn0031127	X	20532944	20540696	+	X_20530078_SNP(trans-intra-arm),X_20533811_SNP(cis)	X_20533355_SNP,X_20533316_SNP,X_20533813_SNP,X_20533802_SNP,X_20533816_SNP,X_20533467_DEL,X_20533712_SNP,X_20533810_SNP,X_20533649_SNP,X_20533811_SNP,X_20533689_SNP,X_20533762_SNP,X_20533684_SNP,X_20533765_SNP,X_20532495_SNP,X_20533621_SNP,X_20533727_SNP,X_20533427_SNP,X_20532452_SNP,X_20533180_SNP,X_20533120_SNP,X_20533198_SNP,X_20532688_SNP,X_20533359_SNP,X_20533392_SNP,X_20533395_DEL,X_2053258…	2.549e-16,3.101e-16,1.441e-15,1.304e-14,2.08e-14,2.343e-14,2.422e-14,3.25e-14,3.523e-14,4.061e-14,4.472e-14,4.707e-14,5.846e-14,6.485e-14,6.816e-14,9.417e-14,2.328e-13,1.36e-12,3.392e-12,3.541e-12,1.383e-11,2.264e-11,5.21e-11,5.931e-11,6.689e-11,1.16e-10,1.237e-10,1.337e-10,1.362e-10,1.362e-10,1.83e-10,2.002e-10,3.593e-10,1.388e-08,1.113e-07,8.023e-07,1.142e-06	X_20530078_SNP,X_20530776_SNP,X_20530232_SNP,X_20530840_SNP,X_20530667_SNP,X_20530495_SNP,X_20530224_SNP,X_20530605_SNP,X_20530815_DEL,X_20530501_SNP,X_20529187_SNP,X_20528839_SNP,X_20529036_SNP,X_20534585_SNP,X_20529989_SNP,X_20528944_SNP,X_20528986_SNP,X_20528488_SNP,X_20530546_SNP,X_20534720_SNP,X_20529768_SNP,X_20528992_SNP,X_20528324_SNP,X_20527257_SNP,X_20527089_SNP,X_20526929_SNP,X_2053128…	2.394e-18,2.193e-16,5.912e-16,7.115e-16,7.664e-16,8.259e-16,9.333e-16,1.038e-15,1.137e-15,1.223e-15,1.403e-15,1.981e-15,3.108e-15,7.338e-15,9.032e-15,1.032e-14,1.79e-14,1.976e-14,6.858e-14,9.866e-14,1.363e-13,5.294e-13,6.625e-13,8.631e-13,1.138e-12,1.346e-12,1.859e-12,2.303e-12,3.049e-12,3.194e-12,3.55e-12,8.088e-12,1.799e-11,2.393e-11,2.443e-11,2.586e-11,2.804e-11,3.064e-11,4.141e-11,5.266e-11,8…	3L_4491562_INS,2R_8909165_SNP	1.147e-06,1.654e-06
FBgn0031141	X	20835554	20836446	-	X_20835166_SNP(cis)	X_20835166_SNP,X_20835039_SNP,X_20835242_SNP,X_20836183_SNP,X_20834711_SNP,X_20835430_SNP,X_20835235_SNP,X_20837039_SNP,X_20836014_SNP,X_20836164_SNP,X_20836347_SNP	4.355e-17,1.028e-16,4.684e-16,9.636e-16,2.028e-15,4.55e-15,8.675e-15,1.989e-13,2.48e-13,3.724e-13,5.251e-13
FBgn0031176	X	21273366	21273799	-	X_21239747_SNP(trans-intra-arm),X_21118529_SNP(trans-intra-arm)			X_21239747_SNP,X_21118529_SNP,X_21364459_SNP,X_21367462_SNP,X_21118533_SNP,X_21097094_INS,X_21257860_SNP,X_20939709_SNP,X_21278521_SNP,X_21252633_SNP,X_21149450_SNP,X_21149451_SNP,X_21298147_SNP,X_20553534_SNP,X_21265950_SNP,X_21160239_SNP,X_21252664_SNP,X_21099126_SNP	4.156e-17,2.309e-15,1.166e-13,1.891e-12,5.609e-12,7.621e-12,1.033e-11,1.18e-11,1.26e-11,1.823e-11,3.216e-11,6.57e-11,6.936e-11,8.335e-11,1.488e-10,2.141e-10,2.442e-10,2.52e-10
FBgn0031188	X	21871817	21873857	-	X_21875053_SNP(trans-intra-arm),3L_10243486_SNP(trans-inter-arm)	X_21873986_DEL,X_21873908_INS,X_21874003_SNP,X_21873951_SNP	6.906e-08,7.139e-08,9.257e-08,1.097e-07	X_21875053_SNP,X_21875440_SNP,X_21875066_SNP,X_21874966_SNP,X_21875376_SNP,X_21875424_SNP,X_21875174_SNP,X_21875191_SNP	6.208e-13,5.367e-12,9.025e-12,1.05e-11,2.509e-11,4.454e-09,1.33e-07,1.769e-07	3L_10243486_SNP	3.058e-07
FBgn0031195	X	21917033	21943860	+	X_21942749_SNP(trans-intra-arm)			X_21942749_SNP,X_21942750_SNP	3.167e-10,7.104e-09
FBgn0031229	2L	156029	157666	+	3L_21762552_SNP(trans-inter-arm)					3L_21762552_SNP	1.727e-08
FBgn0031244	2L	281670	283269	-	2L_310715_SNP(trans-intra-arm)	2L_281613_SNP	2.298e-08	2L_310715_SNP,2L_305149_SNP,2L_397289_SNP,2L_340737_SNP,2L_381728_SNP,2L_392480_SNP,2L_397416_SNP,2L_338520_SNP,2L_436774_SNP,2L_436694_SNP,2L_329858_SNP,2L_278864_SNP,2L_436726_SNP,2L_318650_SNP,2L_395538_SNP,2L_397420_SNP,2L_413192_SNP,2L_413194_SNP,2L_329839_SNP,2L_326244_SNP,2L_336730_SNP,2L_385215_SNP,2L_399323_SNP,2L_329494_SNP,2L_395661_SNP,2L_442051_SNP	9.786e-17,9.066e-16,4.502e-11,1.483e-10,1.854e-10,2.242e-10,3.238e-10,3.396e-10,6.941e-10,1.037e-09,1.101e-09,1.155e-09,1.187e-09,2.658e-09,4.099e-09,5.94e-09,1.034e-08,1.074e-08,1.14e-08,1.247e-08,1.421e-08,2.09e-08,2.534e-08,2.841e-08,3.088e-08,3.412e-08
FBgn0031248	2L	318362	319259	-	2L_318906_SNP(cis)	2L_318906_SNP,2L_319309_SNP,2L_319570_SNP,2L_319697_SNP,2L_317683_SNP	6.666e-25,9.446e-19,9.83e-15,1.441e-11,5.959e-11	2L_345763_SNP,2L_342323_SNP,2L_328113_DEL,2L_373028_SNP,2L_378427_SNP,2L_1339960_SNP,2L_284882_SNP,2L_373572_SNP,2L_371772_SNP	1.59e-21,8.603e-18,4.67e-16,6.061e-15,4.335e-11,3.869e-10,9.435e-10,1.564e-09,1.641e-09
FBgn0031253	2L	420895	421450	-	2L_421490_SNP(cis),2L_445650_DEL(trans-intra-arm)	2L_421567_SNP,2L_421490_SNP,2L_421525_DEL,2L_421516_SNP,2L_421635_SNP,2L_421701_SNP	2.054e-11,4.114e-11,1.139e-10,1.194e-10,3.549e-08,5.811e-08	2L_419632_SNP,2L_419728_SNP,2L_419735_SNP,2L_446629_DEL,2L_445650_DEL,2L_408384_DEL,2L_404042_SNP,2L_403291_SNP	9.785e-10,4.96e-09,1.23e-08,2.287e-08,3.288e-08,6.513e-08,8.14e-08,8.743e-08
FBgn0031275	2L	749945	762399	+	2R_10684188_SNP(trans-inter-arm)					2R_10684188_SNP	4.144e-09
FBgn0031307	2L	1143201	1147395	+	2R_4707481_SNP(trans-inter-arm)					2R_4707481_SNP	1.619e-08
FBgn0031320	2L	1182297	1184020	-	2L_1183992_SNP(cis),2L_1144069_SNP(trans-intra-arm)	2L_1183992_SNP,2L_1183934_SNP,2L_1183936_DEL,2L_1183856_SNP,2L_1184115_SNP,2L_1184013_SNP,2L_1184785_SNP,2L_1183653_SNP,2L_1184517_SNP,2L_1182876_SNP,2L_1182554_SNP,2L_1181365_SNP	1.959e-27,6.571e-27,1.468e-25,2.907e-14,3.665e-11,5.567e-10,1.679e-09,1.954e-09,2.599e-08,2.217e-07,2.629e-07,7.032e-07	2L_1185726_SNP,2L_1185708_SNP,2L_1185535_SNP,2L_1187223_SNP,2L_1188975_SNP,2L_1160525_SNP,2L_1187923_SNP,2L_1187176_SNP,2L_1148062_SNP,2L_1160437_SNP,2L_1188118_SNP,2L_1178976_SNP,2L_1179109_SNP,2L_1178859_SNP,2L_1179677_SNP,2L_1147678_SNP,2L_1179659_SNP,2L_1179657_SNP,2L_1160441_SNP,2L_1147696_SNP,2L_1147676_SNP,2L_1186064_SNP,2L_1160453_SNP,2L_1185325_SNP,2L_1147699_SNP,2L_1147960_SNP,2L_117920…	7.531e-16,3.301e-15,2.111e-13,2.719e-13,6.765e-13,4.824e-12,1.064e-11,1.199e-11,1.26e-11,3.165e-11,3.935e-11,5.575e-11,5.575e-11,6.334e-11,7.492e-11,7.642e-11,7.996e-11,8.588e-11,8.65e-11,1.391e-10,1.566e-10,2.174e-10,4.462e-10,5.242e-10,5.808e-10,6.863e-10,7.71e-10,7.921e-10,1.562e-09,2.291e-09,2.701e-09,4.795e-09,5.261e-09,9.33e-09,9.728e-09,1.076e-08,1.557e-08,1.797e-08,1.897e-08,2.002e-08,2.2…	X_5039160_SNP,2R_18598992_SNP	1.002e-06,1.217e-06
FBgn0031356	2L	1707132	1710421	-	2L_1710429_SNP(cis),3R_24957613_SNP(trans-inter-arm)	2L_1710429_SNP	7.15e-09			3R_24957613_SNP	4.024e-08
FBgn0031359	2L	1716244	1724388	-	2L_1716419_SNP(cis)	2L_1716419_SNP,2L_1716417_SNP,2L_1716307_SNP,2L_1716147_SNP,2L_1716137_DEL,2L_1716145_SNP,2L_1716142_SNP,2L_1715717_SNP,2L_1716148_DEL,2L_1715730_SNP,2L_1715740_SNP,2L_1715708_SNP,2L_1716134_DEL,2L_1716382_INS,2L_1715758_SNP,2L_1716785_SNP,2L_1716770_SNP,2L_1716070_SNP,2L_1716093_SNP,2L_1716387_SNP	4.098e-19,7.893e-17,8.279e-17,8.779e-15,1.638e-14,1.638e-14,2.002e-14,7.193e-14,1.504e-13,2.209e-13,2.209e-13,8.49e-13,8.592e-13,4.985e-11,2.84e-10,7.978e-10,9.745e-10,1.481e-08,3.484e-08,1.402e-07	2L_1717267_SNP,2L_21027744_SNP,2L_21035472_SNP,2L_20954777_SNP	2.347e-10,1.256e-07,1.739e-07,1.746e-07
FBgn0031378	2L	1981176	1982099	+	2L_1981042_SNP(cis)	2L_1981042_SNP,2L_1980997_SNP,2L_1980948_SNP,2L_1981135_SNP,2L_1981133_SNP,2L_1981534_SNP,2L_1981630_SNP,2L_1981276_SNP,2L_1981300_SNP,2L_1980962_SNP,2L_1982107_SNP,2L_1981174_SNP,2L_1981324_SNP,2L_1980976_SNP	5.18e-09,5.732e-09,7.49e-09,1.037e-08,1.929e-08,3.136e-08,7.47e-08,8.415e-08,1.006e-07,1.22e-07,1.266e-07,1.561e-07,1.773e-07,1.881e-07
FBgn0031412	2L	2307948	2308872	+	X_16966949_SNP(trans-inter-arm),2L_19778608_SNP(trans-intra-arm)			2L_19778608_SNP	4.89e-09	X_16966949_SNP	3.384e-09
FBgn0031418	2L	2372455	2374627	-	2L_2373588_SNP(trans-intra-arm),3R_17937345_SNP(trans-inter-arm)	2L_2373439_SNP,2L_2373430_SNP,2L_2373429_SNP,2L_2375017_SNP,2L_2374055_SNP,2L_2374233_SNP,2L_2374361_SNP,2L_2374216_SNP,2L_2374246_SNP,2L_2374228_SNP,2L_2375147_SNP,2L_2374167_SNP,2L_2373295_SNP,2L_2374294_SNP,2L_2371844_SNP,2L_2374124_SNP,2L_2374117_SNP,2L_2374121_SNP,2L_2373636_SNP,2L_2373850_SNP,2L_2374141_SNP,2L_2373379_SNP,2L_2373940_SNP,2L_2372059_SNP,2L_2373087_SNP,2L_2375483_SNP,2L_237326…	3.866e-29,6.261e-28,1.32e-27,1.516e-26,3.178e-26,3.017e-25,3.498e-25,5.374e-25,6.35e-24,7.064e-24,7.145e-24,1.189e-23,7.792e-22,5.643e-20,8.52e-18,1.11e-12,4.561e-12,4.944e-12,9.093e-12,1.806e-11,2.561e-11,3.842e-11,1.55e-10,2.276e-10,4.809e-08,9.121e-08,1.759e-07,2.554e-07	2L_2373588_SNP,2L_2376949_SNP,2L_2375933_SNP,2L_2377879_SNP,2L_2366827_SNP,2L_2364434_SNP,2L_2376395_SNP,2L_2377645_SNP,2L_2377885_SNP,2L_2378389_SNP,2L_2362227_SNP,2L_2362633_SNP,2L_2362414_SNP,2L_2366857_SNP,2L_2368582_SNP,2L_2368875_SNP,2L_2365241_SNP,2L_2366374_SNP,2L_2371082_SNP,2L_2377750_SNP,2L_2378542_SNP,2L_2361690_SNP,2L_2367493_SNP,2L_2378963_SNP,2L_2361296_SNP,2L_2380179_SNP,2L_237795…	3.996e-27,3.876e-26,9.249e-26,1.253e-25,2.097e-25,1.529e-24,2.678e-24,8.814e-24,2.815e-23,5.854e-23,9.808e-23,1.092e-22,1.456e-22,1.833e-22,1.833e-22,1.833e-22,2.769e-22,3.86e-22,4.052e-22,4.459e-22,7.653e-22,1.438e-21,2.012e-21,2.594e-21,2.868e-21,6.7e-21,2.174e-20,3.477e-20,7.909e-20,1.085e-19,2.033e-18,4.001e-18,9.185e-18,1.123e-17,1.365e-17,1.455e-17,1.726e-17,4.076e-17,4.748e-17,7.064e-17,3.…	2R_4425329_SNP,2R_11077443_SNP,X_5000695_SNP,3R_7746984_SNP,3R_17937345_SNP,2R_9138346_SNP,3L_11046453_SNP,3R_17937344_SNP,2R_9138336_SNP,X_13551008_SNP,2R_9138412_SNP,X_3794630_SNP,2R_16150783_SNP,X_3794655_SNP,3L_6573234_SNP	1.164e-07,7.461e-07,1.144e-06,1.195e-06,1.276e-06,1.322e-06,1.419e-06,1.561e-06,2.312e-06,2.344e-06,2.399e-06,3.107e-06,3.267e-06,3.411e-06,3.877e-06
FBgn0031420	2L	2375841	2380506	+	3L_10883038_SNP(trans-inter-arm)					3L_10883038_SNP,3L_10882969_SNP	1.388e-09,2.618e-09
FBgn0031422	2L	2383202	2384747	+	2L_2383841_SNP(cis)	2L_2383841_SNP,2L_2383850_SNP,2L_2384098_SNP,2L_2384307_SNP,2L_2383313_SNP,2L_2384149_SNP,2L_2382911_SNP,2L_2385487_SNP,2L_2382632_SNP,2L_2383242_SNP,2L_2383271_SNP,2L_2385332_SNP,2L_2383382_SNP,2L_2383292_SNP,2L_2383291_SNP,2L_2383175_SNP	1.498e-12,1.498e-12,8.444e-11,1.233e-10,2.475e-10,2.826e-10,6.879e-10,2.045e-09,5.543e-09,7.513e-09,2.378e-08,2.79e-08,7.898e-08,8.504e-08,9.576e-08,9.672e-08	2L_2366857_SNP,2L_2368582_SNP,2L_2368875_SNP,2L_2380179_SNP,2L_2359172_SNP,2L_2361960_SNP,2L_2362013_SNP,2L_2365241_SNP,2L_2360077_SNP,2L_2360579_SNP,2L_2361943_SNP,2L_2359654_SNP,2L_2360262_SNP,2L_2375147_SNP,2L_2362227_SNP,2L_2361690_SNP,2L_2373588_SNP,2L_2362633_SNP,2L_2377966_SNP,2L_2375017_SNP,2L_2362414_SNP,2L_2373430_SNP	2.822e-09,2.822e-09,2.822e-09,2.023e-08,2.442e-08,2.745e-08,4.164e-08,7.687e-08,7.821e-08,8.085e-08,9.543e-08,1.315e-07,1.331e-07,1.511e-07,1.645e-07,1.691e-07,1.827e-07,1.868e-07,2.254e-07,2.491e-07,2.678e-07,2.805e-07
FBgn0031434	2L	2575280	2576997	-	2L_12673222_SNP(trans-intra-arm)			2L_12673222_SNP,2L_12659559_SNP,2L_12660556_SNP,2L_12669281_SNP,2L_12666805_SNP,2L_12671673_SNP,2L_12668661_SNP,2L_12658192_SNP,2L_12655089_SNP,2L_12655293_SNP,2L_12671100_SNP,2L_12649854_SNP	1.43e-10,2.353e-10,3.067e-10,3.576e-10,4.715e-10,4.89e-10,4.918e-10,1.814e-09,1.894e-09,2.907e-09,5.394e-09,5.421e-09
FBgn0031435	2L	2577687	2579179	+	2L_2579576_SNP(cis),2L_12666805_SNP(trans-intra-arm)	2L_2579576_SNP,2L_2578003_SNP,2L_2579706_SNP,2L_2579580_SNP,2L_2577751_SNP,2L_2578774_SNP,2L_2577740_SNP,2L_2577108_SNP,2L_2578733_SNP,2L_2576964_SNP,2L_2578087_SNP,2L_2577584_SNP,2L_2578927_SNP,2L_2577122_SNP	7.218e-10,1.304e-08,1.645e-08,1.826e-08,2.762e-08,2.902e-08,4.533e-08,4.869e-08,5.286e-08,8.615e-08,1.114e-07,1.696e-07,1.725e-07,1.951e-07	2L_2575823_SNP,2L_2586676_SNP,2L_2586639_SNP,2L_2575841_SNP,2L_2573173_SNP,2L_2586855_SNP,2L_12668661_SNP,2L_12671673_SNP,2L_2589340_SNP,2L_2565392_SNP,2L_2576027_SNP,2L_2561148_SNP,2L_2588123_SNP,2L_2588102_DEL,2L_2588099_INS,2L_2572686_SNP,2L_2576159_SNP,2L_2582609_SNP,2L_2583331_SNP,2L_2572673_SNP,2L_12666805_SNP,2L_2564456_SNP,2L_2581696_SNP	3.606e-09,4.06e-09,5.75e-09,9.08e-09,1.344e-08,1.35e-08,1.379e-08,1.479e-08,1.681e-08,2.021e-08,3.647e-08,4.151e-08,4.769e-08,5.84e-08,5.87e-08,6.727e-08,7.671e-08,9.193e-08,1.565e-07,1.566e-07,1.59e-07,1.631e-07,1.795e-07
FBgn0031449	2L	2725674	2739830	+	2L_2739485_SNP(cis)	2L_2739485_SNP	2.265e-09
FBgn0031451	2L	2743375	2744934	-	3L_15837670_SNP(trans-inter-arm),2L_2745509_DEL(cis)	2L_2745897_SNP,2L_2745509_DEL,2L_2744752_SNP,2L_2745898_SNP,2L_2743275_SNP,2L_2745119_SNP	1.187e-08,1.275e-08,2.726e-08,3.983e-08,1.032e-07,1.284e-07	2L_2745998_SNP,2L_2748272_SNP,2L_2748246_SNP,2L_2745954_SNP,2L_2746293_SNP,2L_2748552_SNP	5.997e-09,1.127e-08,1.288e-08,2.718e-08,6.332e-08,9.41e-08	3L_15837670_SNP,3L_15837686_SNP,3L_15837679_SNP,3L_15837695_DEL,3L_15837700_SNP,3L_15837708_DEL,3L_15837712_DEL,3L_14071783_SNP,3L_14071793_SNP,3L_14067494_SNP,3L_14067410_SNP,3L_14067551_SNP	9.385e-10,2.045e-09,1.944e-08,2.7e-08,2.7e-08,2.723e-08,2.723e-08,8.723e-08,8.998e-08,1.292e-07,1.37e-07,1.37e-07
FBgn0031459	2L	2770135	2770904	+	2L_2772003_SNP(trans-intra-arm),3L_8756998_SNP(trans-inter-arm)	2L_2769944_SNP	1.247e-08	2L_2772073_SNP,2L_2772003_SNP,2L_2772037_SNP,2L_2772035_SNP,2L_2772157_SNP,2L_2771932_SNP,2L_2772442_SNP,2L_2772424_SNP,2L_2779691_SNP,2L_2772548_SNP,2L_2779847_SNP,2L_2781305_SNP,2L_2763791_SNP,2L_2765447_SNP,2L_2768945_SNP,2L_2765894_SNP,2L_2768603_SNP,2L_2766575_SNP,2L_2764738_SNP,2L_2780466_SNP,2L_2766296_SNP	5.83e-18,6.102e-18,7.123e-18,1.284e-16,5.767e-16,9.576e-14,4.38e-13,1.088e-11,7.468e-10,1.291e-09,2.623e-09,4.525e-09,1.212e-07,1.409e-07,2.353e-07,2.451e-07,2.694e-07,4.352e-07,5.93e-07,6.765e-07,8.207e-07	3L_8756998_SNP,3L_8756981_SNP,3L_8757013_SNP	8.304e-08,4.451e-07,4.839e-07
FBgn0031460	2L	2770884	2771776	-	2L_2772003_SNP(cis)	2L_2772037_SNP,2L_2772003_SNP,2L_2772073_SNP,2L_2772035_SNP,2L_2772157_SNP,2L_2772424_SNP,2L_2771932_SNP,2L_2772442_SNP,2L_2772548_SNP,2L_2769944_SNP,2L_2771974_SNP,2L_2771013_SNP	1.185e-29,4.087e-29,1.648e-28,2.707e-26,1.496e-19,2.393e-19,7.621e-18,2.989e-14,5.409e-14,5.864e-13,1.271e-10,2.217e-07	2L_2779691_SNP,2L_2767867_SNP,2L_2768945_SNP,2L_2779847_SNP,2L_2766575_SNP,2L_2768603_SNP,2L_2765894_SNP,2L_2763304_SNP,2L_2762342_SNP,2L_2764469_SNP,2L_2764202_SNP,2L_2764032_SNP,2L_2767857_SNP,2L_2763913_SNP,2L_2766296_SNP,2L_2780466_SNP,2L_2764738_SNP,2L_2765447_SNP,2L_2764027_SNP,2L_2763791_SNP,2L_2764248_DEL,2L_2763711_SNP,2L_2767601_SNP,2L_2767411_SNP,2L_2763521_SNP,2L_2766506_SNP,2L_276328…	1.23e-12,6.045e-12,1.02e-11,1.575e-11,2.267e-11,2.942e-11,4.141e-11,5.227e-11,7.4e-11,9.182e-11,1.118e-10,1.189e-10,1.391e-10,1.523e-10,1.572e-10,1.624e-10,1.748e-10,3.185e-10,3.215e-10,4.767e-10,4.839e-10,4.908e-10,8.228e-10,9.706e-10,1.03e-09,1.402e-09,1.406e-09,1.416e-09,1.544e-09,1.638e-09,2.033e-09,2.25e-09,2.357e-09,2.599e-09,2.812e-09,2.981e-09,3.035e-09,4.212e-09,4.833e-09,4.886e-09,6.009…
FBgn0031473	2L	2848989	2855778	-	2L_2854895_SNP(cis),2L_17494560_SNP(trans-intra-arm)	2L_2854895_SNP	7.252e-09	2L_17494560_SNP	2.394e-08
FBgn0031478	2L	2874890	2877168	+	3L_21761049_SNP(trans-inter-arm)					3L_21761049_SNP,3L_21762552_SNP	4.151e-09,4.788e-09
FBgn0031483	2L	2974859	2976862	-	2L_2973968_SNP(cis),3L_1885869_SNP(trans-inter-arm)	2L_2973968_SNP,2L_2977574_SNP,2L_2977417_SNP,2L_2976028_SNP,2L_2975753_SNP,2L_2975270_SNP,2L_2976887_SNP	3.446e-11,1.27e-10,1.682e-10,2.009e-10,1.173e-09,5.947e-08,1.983e-07	2L_2973836_SNP,2L_2972769_SNP,2L_2972890_SNP,2L_2973215_SNP,2L_2978732_SNP	1.366e-10,2.676e-10,1.179e-09,1.438e-09,1.284e-08	3L_1885869_SNP	3.282e-07
FBgn0031484	2L	2977122	2978500	+	2L_2977417_SNP(cis),2L_2976870_SNP(cis)	2L_2977574_SNP,2L_2977417_SNP,2L_2976870_SNP,2L_2977850_SNP,2L_2978489_SNP,2L_2979146_SNP,2L_2979327_SNP,2L_2978302_SNP,2L_2979176_SNP,2L_2978535_SNP,2L_2978692_SNP,2L_2979401_INS,2L_2977416_SNP,2L_2977549_SNP,2L_2977536_SNP,2L_2978539_DEL,2L_2976212_SNP	6.403e-22,3.099e-21,3.364e-16,1.699e-10,1.878e-09,2.358e-09,4.487e-09,4.615e-09,4.666e-09,2.603e-08,1.144e-07,2.733e-07,3.308e-07,3.461e-07,4.131e-07,1.712e-06,1.978e-06	2L_2972769_SNP,2L_2976028_SNP,2L_2976113_SNP,2L_2975753_SNP,2L_2973215_SNP,2L_2972890_SNP,2L_2981612_SNP,2L_2981589_SNP,2L_2994893_SNP,2L_2992752_SNP,2L_2992905_SNP,2L_2992791_SNP,2L_2992939_SNP,2L_2992801_SNP,2L_2992917_SNP,2L_2973629_SNP,2L_2992903_SNP,2L_2981871_SNP,2L_2992774_SNP,2L_2992872_SNP,2L_2992831_SNP,2L_2992844_SNP,2L_2992837_SNP,2L_2984679_SNP,2L_2969058_SNP,2L_2971686_SNP,2L_299287…	4.014e-21,6.759e-21,4.951e-20,1.155e-19,1.656e-19,2.045e-19,1.274e-14,8.689e-14,1.002e-13,1.167e-13,4.898e-13,9.234e-13,1.355e-12,1.739e-12,1.758e-12,1.875e-12,2.016e-12,3.405e-12,6.077e-12,7.176e-12,7.395e-12,9.225e-12,9.637e-12,2.391e-11,2.983e-11,3.697e-11,5.712e-11,5.745e-11,7.747e-11,7.841e-11,9.419e-11,1.264e-10,2.982e-10,4.165e-10,7.574e-10,1.098e-09,1.233e-09,1.356e-09,2.039e-09,3.678e-09…	3L_4813905_SNP	3.87e-06
FBgn0031515	2L	3291245	3294706	-	2L_3293799_SNP(cis)	2L_3293799_SNP,2L_3294306_SNP,2L_3294303_SNP,2L_3294061_INS,2L_3294034_SNP,2L_3293977_SNP,2L_3293972_SNP,2L_3294065_SNP,2L_3293836_SNP,2L_3294168_SNP	4.342e-11,1.201e-10,1.369e-10,1.797e-10,2.487e-09,2.703e-09,3.757e-09,5.781e-09,2.177e-08,5.62e-08
FBgn0031519	2L	3316794	3319872	-	2L_3318341_SNP(trans-intra-arm)			2L_3318341_SNP,2L_3318285_SNP,2L_3318409_SNP,2L_3318420_SNP	1.83e-10,4.212e-10,4.399e-10,4.062e-09
FBgn0031523	2L	3332814	3334790	+	2L_3333285_SNP(cis)	2L_3333285_SNP,2L_3333510_SNP,2L_3333528_SNP	2.223e-23,2.89e-11,2.631e-10
FBgn0031533	2L	3445992	3447589	+	2L_3445885_SNP(cis)	2L_3445885_SNP	2.144e-49	2L_7524510_SNP,2L_1859870_SNP	9.118e-12,8.677e-11
FBgn0031547	2L	3522521	3524056	-	2L_3524134_SNP(cis)	2L_3524134_SNP,2L_3523257_SNP,2L_3524179_SNP,2L_3524187_SNP,2L_3522662_SNP	1.068e-46,1.39e-29,4.583e-14,1.373e-13,6.203e-11	2L_3521087_SNP,2L_3521124_SNP,2L_3520730_SNP,2L_3321197_SNP,2L_7489619_SNP,2L_7489584_SNP,2L_3321403_SNP,2L_3321408_SNP	3.293e-20,3.293e-20,4.059e-19,6.795e-12,9.418e-12,2.393e-11,3.23e-11,3.529e-11
FBgn0031566	2L	3713360	3716810	+	2L_3713453_SNP(cis)	2L_3713453_SNP,2L_3713521_SNP,2L_3713492_SNP	2.46e-17,4.036e-09,2.853e-08	2L_11257175_DEL	1.682e-08
FBgn0031571	2L	3787167	3802726	+	2L_4041210_SNP(trans-intra-arm),2L_3794756_SNP(trans-intra-arm),2L_19246324_SNP(trans-intra-arm)	2L_3787151_SNP	1.014e-08	2L_4041210_SNP,2L_4041211_SNP,2L_1914124_SNP,2L_3899657_DEL,2L_3845311_SNP,2L_4130039_SNP,2L_3893844_SNP,2L_4025363_SNP,2L_3794756_SNP,2L_4025342_SNP,2L_4025340_SNP,2L_3710050_SNP,2L_4025411_SNP,2L_4070983_SNP,2L_4025346_SNP,2L_3714730_SNP,2L_3981526_SNP,2L_4157060_SNP,2L_1908927_SNP,2L_4098073_SNP,2L_4130071_SNP,2L_3768114_SNP,2L_3374330_SNP,2L_4297903_SNP,2L_3794753_SNP,2L_3854790_SNP,2L_374181…	1.644e-13,3.299e-13,2.641e-11,3.102e-11,3.04e-10,9.277e-10,1.483e-09,1.629e-09,1.835e-09,1.894e-09,1.911e-09,2.004e-09,2.299e-09,2.507e-09,3.099e-09,3.124e-09,3.519e-09,3.57e-09,4.016e-09,4.022e-09,4.4e-09,5.204e-09,6.189e-09,6.268e-09,6.676e-09,7.691e-09,8.136e-09,1.516e-08,1.657e-08,1.698e-08,1.904e-08,2.177e-08,2.271e-08,2.309e-08,2.877e-08,3.439e-08,3.582e-08,4.068e-08,4.544e-08,4.788e-08,4.8…	3L_15191563_INS,3L_15191710_INS,3L_15191670_SNP,3L_15191633_DEL,3L_15191628_SNP,X_4927857_SNP,3R_21744888_SNP	4.166e-09,2.174e-08,2.24e-08,8.52e-08,1.246e-07,2.007e-07,6.171e-07
FBgn0031589	2L	4189340	4198071	-	2L_4192729_SNP(trans-intra-arm)			2L_4192729_SNP	5.505e-09
FBgn0031603	2L	4442320	4442985	+	2L_4442414_SNP(cis)	2L_4442414_SNP,2L_4442432_SNP	3.466e-12,6.698e-11
FBgn0031607	2L	4453169	4454453	-	2L_4454411_SNP(cis)	2L_4454312_SNP,2L_4453390_SNP,2L_4454411_SNP,2L_4454364_SNP	1.173e-11,5.127e-10,9.037e-10,1.296e-08
FBgn0031609	2L	4461657	4463447	-	2L_4463082_DEL(cis)	2L_4463056_DEL,2L_4463054_INS,2L_4463082_DEL,2L_4463507_SNP,2L_4463124_SNP,2L_4463359_INS,2L_4463485_SNP,2L_4463506_SNP,2L_4463814_SNP,2L_4462986_SNP,2L_4463000_SNP,2L_4463802_SNP,2L_4463138_SNP,2L_4462853_SNP,2L_4463849_SNP,2L_4463458_SNP,2L_4463767_SNP,2L_4463448_DEL,2L_4463413_SNP,2L_4464241_SNP,2L_4464038_SNP,2L_4463148_SNP,2L_4463188_SNP,2L_4464180_SNP,2L_4462628_SNP,2L_4462913_SNP,2L_446295…	2.025e-31,2.973e-31,2.818e-30,6.294e-25,8.249e-25,1.425e-24,2.259e-24,2.475e-24,1.56e-22,1.674e-22,6.927e-22,3.627e-21,2.212e-19,1.042e-18,1.145e-15,5.738e-13,6.197e-13,6.921e-12,2.123e-11,3.938e-11,4.955e-11,5.901e-11,2.544e-10,1.413e-08,3.158e-08,3.286e-08,1.192e-07,3.05e-07	2L_4465337_SNP,2L_4464619_SNP,2L_4465330_SNP,2L_4465309_SNP	9.047e-08,1.047e-07,2.191e-07,3.438e-07
FBgn0031631	2L	4815613	4818245	-	2L_4818186_DEL(cis),X_19910762_SNP(trans-inter-arm)	2L_4818183_SNP,2L_4818186_DEL,2L_4818280_SNP,2L_4818388_SNP,2L_4818354_SNP,2L_4818527_SNP,2L_4818398_SNP,2L_4818416_SNP	2.755e-16,2.82e-13,2.681e-12,6.252e-11,8.302e-11,2.325e-10,3.54e-10,4.903e-09	2L_4817046_SNP	7.259e-09	X_19910762_SNP	1.913e-07
FBgn0031636	2L	4838347	4841465	+	2L_4836950_SNP(trans-intra-arm)	2L_4839163_INS,2L_4839284_SNP	5.238e-11,1.336e-09	2L_4836950_SNP,2L_4847555_SNP,2L_4836341_SNP,2L_4846391_SNP,2L_4846392_SNP,2L_4834210_SNP	2.716e-16,5.379e-12,5.465e-11,2.238e-09,4.777e-09,6.633e-09	X_8110346_SNP,X_8110760_SNP,X_8110784_INS,X_8110786_SNP,X_8108669_SNP,X_8108665_SNP	5.312e-10,1.329e-09,1.329e-09,1.329e-09,3.233e-09,1.395e-08
FBgn0031649	2L	4933047	4936450	-	2L_4932627_SNP(cis)	2L_4932627_SNP	3.395e-09
FBgn0031651	2L	4944256	4945361	-	2L_4944263_SNP(cis),2L_4942028_SNP(trans-intra-arm)	2L_4944263_SNP,2L_4944352_SNP,2L_4944903_SNP,2L_4944325_SNP,2L_4944952_SNP,2L_4944899_INS,2L_4944872_SNP,2L_4944873_SNP,2L_4945359_SNP,2L_4944460_SNP,2L_4944491_SNP,2L_4945015_SNP,2L_4944964_SNP,2L_4945078_SNP,2L_4945563_SNP,2L_4945638_SNP,2L_4945593_SNP,2L_4944571_SNP,2L_4945116_SNP	1.488e-15,4.494e-13,4.276e-11,5.182e-11,6.548e-11,1.971e-10,2.346e-10,3.985e-10,4.516e-09,1.165e-08,1.165e-08,3.338e-08,3.468e-08,7.985e-08,8.97e-08,1.776e-07,1.814e-07,2.595e-07,3.942e-07	2L_4942199_SNP,2L_4942028_SNP,2L_4941988_SNP,2L_4941981_SNP,2L_4952155_SNP,2L_4952159_SNP,2L_4942123_SNP,2L_4952176_SNP,2L_4952171_SNP,2L_4952040_SNP,2L_4941919_SNP,2L_4941917_SNP,2L_4952045_SNP,2L_4947671_SNP,2L_4941857_SNP,2L_4941847_SNP,2L_4947650_SNP,2L_4947689_SNP,2L_4952235_SNP,2L_4937527_INS,2L_4952170_SNP,2L_4941909_SNP,2L_4952001_SNP,2L_4952222_SNP,2L_4952205_SNP,2L_4952228_SNP,2L_169366…	2.002e-10,2.152e-10,3.416e-10,4.958e-10,1.329e-09,1.556e-09,1.565e-09,3.19e-09,6.042e-09,6.438e-09,6.598e-09,7.423e-09,9.549e-09,1.177e-08,3.355e-08,3.719e-08,4.182e-08,4.753e-08,4.963e-08,5.12e-08,5.214e-08,6.161e-08,6.691e-08,1.708e-07,1.793e-07,1.794e-07,5.203e-07,7.436e-07,9.484e-07
FBgn0031653	2L	4949941	4950767	-	2L_4952053_SNP(trans-intra-arm)			2L_4952053_SNP	3.449e-12
FBgn0031663	2L	4978484	4979379	-	2L_4978502_SNP(cis)	2L_4978502_SNP,2L_4979418_SNP,2L_4979430_SNP,2L_4979329_SNP,2L_4979370_SNP,2L_4977800_SNP,2L_4979625_SNP	1.187e-31,4.727e-14,1.361e-13,1.449e-13,1.344e-12,7.516e-12,3.464e-09	2L_4981973_DEL,2L_4974632_SNP,2L_4974558_SNP,2L_4982615_SNP	9.737e-21,2.042e-15,1.64e-09,6.01e-09	X_10460345_SNP,X_10457180_SNP,2R_11465993_SNP	6.429e-10,2.619e-09,1.055e-08
FBgn0031681	2L	5072170	5093592	-	2L_5079060_SNP(trans-intra-arm)			2L_5079060_SNP	2.144e-18
FBgn0031684	2L	5099177	5100288	-	2L_5099752_SNP(cis)	2L_5099752_SNP,2L_5099474_SNP	4.582e-09,4.801e-08
FBgn0031695	2L	5268498	5270329	+	2L_5268495_SNP(cis)	2L_5268495_SNP,2L_5268198_SNP,2L_5268298_SNP	1.304e-18,1.697e-09,2.298e-09
FBgn0031708	2L	5518893	5519896	-	2L_5515293_SNP(trans-intra-arm)			2L_5515293_SNP	3.098e-15
FBgn0031710	2L	5521281	5523898	-	2L_5522056_SNP(cis)	2L_5522052_SNP,2L_5522036_SNP,2L_5521588_SNP,2L_5522056_SNP,2L_5521780_SNP,2L_5521849_SNP	3.204e-09,4.505e-09,6.063e-09,6.381e-09,6.165e-08,7.407e-08
FBgn0031713	2L	5530620	5532223	-	2L_5532229_SNP(cis)	2L_5532250_SNP,2L_5532037_SNP,2L_5532229_SNP,2L_5532198_SNP,2L_5532034_SNP,2L_5532242_SNP,2L_5532036_SNP,2L_5532181_SNP,2L_5532226_SNP,2L_5532254_SNP,2L_5532227_SNP,2L_5531953_SNP,2L_5531818_SNP,2L_5532196_SNP,2L_5532345_SNP,2L_5532883_SNP,2L_5532853_SNP,2L_5533147_SNP,2L_5532904_SNP	1.277e-15,1.407e-15,1.989e-15,4.425e-15,6.241e-15,2.036e-14,2.528e-14,4.472e-14,5.005e-14,6.744e-14,1.194e-13,1.271e-13,3.783e-13,2.667e-12,1.522e-11,3.948e-08,1.227e-07,2.614e-07,2.825e-07	2L_5535069_SNP,2L_5533553_SNP,2L_5534331_SNP,2L_5533498_SNP,2L_5534358_SNP	1.88e-08,1.939e-08,4.071e-08,7.043e-08,1.93e-07	2R_10705413_SNP	3.207e-07
FBgn0031717	2L	5547086	5549614	+	2L_16437827_SNP(trans-intra-arm)			2L_16445286_SNP,2L_16439952_SNP,2L_16443104_SNP,2L_16447085_SNP,2L_16437947_SNP,2L_16439760_SNP,2L_16437966_SNP,2L_16437827_SNP,2L_16445727_SNP,2L_16447790_SNP	2.489e-08,3.318e-08,3.68e-08,3.697e-08,4.116e-08,4.431e-08,4.583e-08,4.841e-08,1.298e-07,1.708e-07
FBgn0031737	2L	5762553	5766142	-	2L_5765881_SNP(cis)	2L_5765881_SNP	4.508e-10
FBgn0031741	2L	5805395	5809063	+	2L_5805329_SNP(cis),2L_5808365_SNP(cis)	2L_5805329_SNP,2L_5805492_SNP,2L_5805431_SNP,2L_5808365_SNP,2L_5806172_SNP	7.269e-12,4.451e-10,4.655e-10,7.237e-10,2.135e-09	2L_5807452_SNP,2L_5807275_SNP	1.575e-10,2.274e-10
FBgn0031760	2L	6000228	6003738	+	2L_6001799_DEL(trans-intra-arm),2L_6000147_SNP(cis)	2L_6003786_SNP,2L_6003065_SNP,2L_6000726_SNP,2L_5999935_SNP,2L_5999771_SNP,2L_5999667_SNP,2L_6002934_SNP,2L_5999852_SNP,2L_6000043_SNP,2L_6000147_SNP,2L_6003262_SNP,2L_5999742_SNP,2L_5999697_SNP,2L_5999925_SNP,2L_6004641_SNP,2L_5999735_SNP,2L_6004731_SNP,2L_5999643_SNP,2L_5999890_SNP,2L_6000142_SNP,2L_5999933_SNP,2L_6000129_SNP,2L_6000012_SNP,2L_5999928_SNP,2L_6004734_SNP,2L_5999984_SNP	3.16e-21,6.206e-20,6.012e-19,1.01e-15,1.092e-14,3.741e-13,3.757e-12,1.662e-11,3.23e-11,7.861e-11,1.616e-10,3.199e-10,3.921e-10,6.001e-10,6.158e-10,8.688e-10,9.52e-10,1.099e-09,5.114e-09,9.222e-09,2.062e-08,2.586e-08,2.866e-08,5.685e-08,1.023e-07,1.526e-07	2L_6001837_SNP,2L_6002103_SNP,2L_6002136_SNP,2L_6002630_SNP,2L_6001799_DEL,2L_5996561_SNP,2L_6004745_SNP,2L_5995203_SNP,2L_6005641_SNP,2L_6004972_SNP,2L_6005879_SNP,2L_6001758_SNP,2L_5997763_SNP,2L_5997798_SNP,2L_6002256_SNP,2L_6004985_SNP,2L_6009905_SNP,2L_5997165_SNP,2L_5993112_SNP,2L_6004960_SNP,2L_6005671_SNP,2L_6005161_SNP,2L_2754492_SNP,2L_5995009_SNP,2L_6005945_SNP,2L_6004984_SNP,2L_600511…	5.358e-25,3.638e-23,2.949e-21,2.632e-20,3.146e-20,1.384e-15,2.003e-15,2.856e-13,3.042e-13,1.972e-11,3.329e-11,4.267e-11,2.205e-10,3.752e-10,7.453e-10,1.56e-09,2.394e-09,2.885e-09,2.986e-09,3.005e-09,4.067e-09,4.621e-09,5.987e-09,9.999e-09,1.084e-08,1.153e-08,1.954e-08,2.557e-08,1.457e-07	3L_6908891_SNP	5.416e-10
FBgn0031762	2L	6007364	6012338	-	2L_6012384_SNP(cis)	2L_6012384_SNP	9.685e-10
FBgn0031768	2L	6048002	6050474	+	2L_6049520_SNP(cis)	2L_6049520_SNP,2L_6049528_SNP,2L_6049490_SNP,2L_6050834_SNP,2L_6050773_SNP,2L_6050613_SNP,2L_6050711_SNP,2L_6051033_SNP,2L_6051329_SNP,2L_6051463_SNP,2L_6051437_DEL,2L_6051440_SNP,2L_6051441_SNP,2L_6051444_SNP,2L_6051374_SNP,2L_6051472_SNP,2L_6051416_SNP,2L_6051452_SNP,2L_6051422_SNP,2L_6051423_SNP,2L_6051369_SNP,2L_6051448_SNP	3.674e-13,1.212e-12,6.877e-11,7.143e-10,1.04e-09,1.328e-09,1.344e-09,1.794e-08,2.177e-08,4.985e-08,6.235e-08,6.235e-08,6.235e-08,6.235e-08,6.302e-08,6.302e-08,7.9e-08,9.591e-08,1.003e-07,1.033e-07,1.285e-07,2.381e-07	2L_6049442_SNP,2L_6051655_SNP,2L_6049228_SNP,2L_6049192_SNP,2L_6052310_SNP	1.759e-10,8.419e-08,1.652e-07,2.223e-07,3.135e-07
FBgn0031779	2L	6096698	6098966	-	2L_6097278_SNP(cis)	2L_6097278_SNP,2L_6096818_SNP	2.108e-11,1.079e-10
FBgn0031791	2L	6255859	6256822	+	2L_6255256_SNP(cis),2L_6256592_SNP(cis)	2L_6255256_SNP,2L_6255511_SNP,2L_6255491_SNP,2L_6255512_SNP,2L_6256642_SNP,2L_6256639_SNP,2L_6255246_SNP,2L_6256592_SNP,2L_6255252_SNP,2L_6256496_SNP,2L_6255377_SNP	1.518e-10,2.8e-10,7.2e-10,1.428e-09,3.637e-09,7.674e-09,1.012e-08,1.612e-08,1.778e-08,2.568e-08,1.825e-07
FBgn0031799	2L	6332881	6338671	-	2L_6335719_SNP(trans-intra-arm),2L_6335770_SNP(trans-intra-arm)			2L_6335719_SNP,2L_6335698_SNP,2L_6335770_SNP,2L_6335740_SNP	3.171e-17,4.486e-16,1.931e-10,3.371e-09
FBgn0031832	2L	6559426	6562289	-	2L_6560161_SNP(cis),X_12937470_SNP(trans-inter-arm),2L_6560299_SNP(cis)	2L_6560161_SNP,2L_6560305_SNP,2L_6560308_SNP,2L_6560299_SNP,2L_6560413_SNP,2L_6560335_SNP	1.262e-09,3.085e-09,6.031e-09,7.197e-09,9.659e-09,1.715e-08			X_12937470_SNP	7.932e-08
FBgn0031860	2L	6803011	6804372	+	2L_6803533_SNP(cis),2L_6802556_SNP(cis)	2L_6803533_SNP,2L_6803535_SNP,2L_6803466_SNP,2L_6802569_SNP,2L_6802556_SNP,2L_6803586_SNP,2L_6803588_SNP,2L_6803589_SNP,2L_6803558_SNP,2L_6803569_SNP,2L_6804589_SNP,2L_6803210_SNP,2L_6803433_SNP,2L_6803430_SNP,2L_6803295_INS,2L_6804637_SNP,2L_6803346_SNP,2L_6803421_SNP,2L_6803288_SNP	2.063e-11,2.642e-10,3.404e-10,4.115e-10,6.835e-10,1.041e-09,1.125e-09,1.125e-09,2.458e-09,2.547e-09,4.525e-09,5.24e-09,8.364e-09,9.011e-09,9.327e-09,6.621e-08,1.663e-07,1.665e-07,1.749e-07	2L_6806091_SNP,2L_6801168_SNP,2L_6801072_SNP,2L_6801084_SNP,2L_6800971_SNP	1.533e-08,4.614e-08,9.182e-08,9.538e-08,2.486e-07
FBgn0031868	2L	6908083	6911423	+	2L_6910565_SNP(cis)	2L_6910565_SNP	6.854e-12
FBgn0031873	2L	6949310	6950207	-	2L_6950087_SNP(cis)	2L_6950087_SNP,2L_6948932_SNP,2L_6950658_SNP,2L_6949351_SNP,2L_6949528_SNP,2L_6949098_SNP,2L_6950199_SNP,2L_6950733_SNP,2L_6949027_SNP	1.1e-15,1.193e-09,1.308e-09,1.401e-09,1.098e-08,1.272e-08,1.655e-08,3.829e-08,8.004e-08	2L_6960516_SNP,2L_6960756_SNP,2L_6960573_SNP,2L_6960600_SNP,2L_6960657_SNP	1.183e-08,1.754e-08,4.454e-08,6.741e-08,9.79e-08
FBgn0031874	2L	6954357	6956950	-	2L_6955724_SNP(trans-intra-arm)	2L_6957063_DEL,2L_6956912_INS,2L_6956019_SNP	9.115e-12,1.157e-11,2.241e-11	2L_6955724_SNP,2L_6955767_SNP	6.104e-15,7.463e-14
FBgn0031877	2L	6960377	6961653	+	2L_6960423_SNP(cis),3L_19887219_SNP(trans-inter-arm)	2L_6960423_SNP,2L_6960475_SNP,2L_6960332_SNP,2L_6960326_SNP	1.216e-10,1.538e-10,9.322e-10,4.322e-09			3L_19887219_SNP,3L_19886944_SNP	2.531e-09,2.613e-08
FBgn0031878	2L	6961516	6964074	-	2L_6964074_SNP(cis)	2L_6964074_SNP	1.568e-08
FBgn0031886	2L	7064431	7065837	-	2L_7065598_SNP(cis),2L_7065840_SNP(cis),2R_17022271_SNP(trans-inter-arm)	2L_7065598_SNP,2L_7064653_SNP,2L_7063738_DEL,2L_7063779_SNP,2L_7063747_DEL,2L_7064554_SNP,2L_7065082_SNP,2L_7064986_SNP,2L_7065008_SNP,2L_7064675_SNP,2L_7065340_SNP,2L_7065343_SNP,2L_7065861_SNP,2L_7064971_SNP,2L_7066157_SNP,2L_7065958_SNP,2L_7065840_SNP,2L_7065017_SNP,2L_7065843_SNP,2L_7063887_SNP,2L_7065073_SNP,2L_7065040_SNP,2L_7064991_SNP,2L_7065550_SNP,2L_7063537_SNP,2L_7065043_SNP,2L_706564…	2.15e-12,1.598e-10,6.46e-10,7.854e-10,9.293e-10,1.379e-09,2.418e-09,3.39e-09,3.592e-09,5.244e-09,5.317e-09,5.317e-09,8.204e-09,8.532e-09,8.684e-09,8.797e-09,1.231e-08,1.387e-08,1.646e-08,1.757e-08,1.808e-08,1.99e-08,2.642e-08,3.28e-08,5.015e-08,7.128e-08,2.497e-07,3.744e-07	2L_7058276_SNP,2L_7068156_SNP,2L_7058335_SNP	3.977e-08,1.105e-07,4.466e-07	3L_10244141_SNP,3L_10243389_SNP,3R_14409556_SNP,2R_17022271_SNP,3L_10243366_INS,2R_17022275_SNP,3L_10244106_SNP	1.045e-07,1.154e-07,3.854e-07,4.841e-07,4.966e-07,5.321e-07,6.252e-07
FBgn0031902	2L	7333714	7352542	+	2L_7351139_MNP(trans-intra-arm),2L_3699924_SNP(trans-intra-arm),2L_7337138_SNP(trans-intra-arm)	2L_7352091_SNP,2L_7333792_SNP,2L_7352016_SNP,2L_7351553_SNP,2L_7352139_SNP,2L_7351622_SNP,2L_7334506_SNP,2L_7353203_SNP	2.499e-10,2.878e-08,3.306e-08,4.53e-08,8.541e-08,1.307e-07,6.998e-07,8.009e-07	2L_7351169_SNP,2L_7337632_SNP,2L_7351139_MNP,2L_7351150_SNP,2L_7342674_SNP,2L_7351173_SNP,2L_7351151_SNP,2L_7351155_SNP,2L_7337138_SNP,2L_7351157_SNP,2L_7351153_SNP,2L_7350841_SNP,2L_7351134_SNP,2L_7351160_SNP,2L_7360633_SNP,2L_7357517_SNP,2L_7351158_SNP,2L_7337389_SNP,2L_7342659_SNP,2L_7338270_SNP,2L_7336354_SNP,2L_7338467_SNP,2L_7361573_SNP,2L_7360410_SNP,2L_7332043_SNP,2L_7359870_SNP,2L_733165…	1.467e-12,1.552e-12,1.835e-12,2.218e-12,9.129e-12,1.605e-11,1.946e-11,2.99e-11,3.308e-11,4.533e-11,7.476e-11,1.073e-10,1.541e-10,2.11e-10,2.657e-10,2.716e-10,2.777e-10,3.651e-10,5.7e-10,6.093e-10,6.865e-10,1.102e-09,1.24e-09,2.049e-09,4.896e-09,5.265e-09,6.376e-09,8.077e-09,8.767e-09,9.16e-09,1.084e-08,1.355e-08,2.036e-08,2.291e-08,2.402e-08,2.522e-08,3.077e-08,3.764e-08,5.105e-08,5.953e-08,6.031…	X_15641333_SNP,X_7738715_SNP,X_999503_DEL	3.975e-07,4.251e-07,9.931e-07
FBgn0031910	2L	7410909	7412229	+	2L_7412143_SNP(cis),3R_3453766_SNP(trans-inter-arm)	2L_7412143_SNP,2L_7411701_SNP,2L_7411950_SNP,2L_7412014_SNP,2L_7412238_SNP,2L_7412213_SNP,2L_7412218_SNP,2L_7411949_SNP,2L_7412239_SNP,2L_7412200_SNP,2L_7412018_INS,2L_7412100_SNP,2L_7412220_SNP	1.498e-12,5.057e-12,1.332e-11,3.669e-11,4.282e-11,6.027e-11,7.628e-11,8.165e-11,1.604e-10,4.17e-10,1.054e-09,9.499e-09,1.984e-08	2L_7409522_SNP,2L_7406326_SNP,2L_7413500_SNP	5.599e-10,1.17e-07,2.552e-07	3R_3453766_SNP	1.847e-07
FBgn0031918	2L	7466543	7472493	+	2L_7469877_SNP(trans-intra-arm),X_8176958_SNP(trans-inter-arm)			2L_7469893_SNP,2L_7469877_SNP,2L_7469884_SNP,2L_7469892_SNP,2L_7469885_SNP	1.225e-12,5.038e-12,1.275e-11,7.057e-11,1.33e-10	X_8176958_SNP	1.381e-08
FBgn0031925	2L	7605600	7607701	+	2L_7605556_SNP(cis),2L_7605227_SNP(cis),3L_14247949_SNP(trans-inter-arm)	2L_7605556_SNP,2L_7606318_SNP,2L_7605925_SNP,2L_7605762_SNP,2L_7605529_SNP,2L_7606183_SNP,2L_7606048_SNP,2L_7605899_SNP,2L_7605589_SNP,2L_7605227_SNP,2L_7605536_INS,2L_7605801_SNP,2L_7606149_SNP,2L_7606832_SNP,2L_7606180_SNP,2L_7606078_SNP,2L_7605919_SNP,2L_7605767_SNP,2L_7605907_SNP,2L_7607010_SNP,2L_7605854_SNP,2L_7606483_DEL,2L_7606814_SNP,2L_7606477_SNP,2L_7606712_SNP,2L_7606135_SNP,2L_760531…	9.824e-23,3.262e-22,3.376e-21,1.444e-20,1.844e-20,1.857e-20,6.536e-20,9.002e-20,1.262e-19,1.655e-19,4.085e-19,4.256e-19,5.409e-19,5.995e-19,8.344e-19,9.928e-19,1.047e-18,2.204e-18,2.244e-18,6.358e-18,8.985e-18,9.134e-18,1.103e-17,2.335e-17,1.155e-16,3.378e-16,6.017e-15,9.066e-15,7.431e-13,9.957e-13,1.358e-12,1.38e-12,2.365e-12,1.167e-09,1.368e-09,5.733e-09,9.336e-09,1.546e-08,1.636e-08,2.042e-08,…	2L_7606625_SNP,2L_7592874_INS,2L_7598431_SNP,2L_7598429_SNP,2L_7590825_SNP,2L_7606674_SNP,2L_7592867_SNP,2L_7591138_SNP,2L_7592905_SNP,2L_7589533_SNP,2L_7593614_SNP,2L_7591071_SNP,2L_7597755_SNP,2L_7591060_SNP,2L_7597350_SNP,2L_7597044_SNP,2L_7590270_DEL,2L_7595253_INS,2L_7591083_SNP,2L_7595509_SNP,2L_7591334_SNP,2L_7589338_SNP,2L_7596469_SNP,2L_7595267_SNP,2L_7597645_DEL,2L_7584913_SNP,2L_759766…	1.409e-19,2.144e-14,1.535e-13,1.779e-13,3.18e-13,4.457e-13,6.168e-13,6.971e-13,8.907e-13,1.646e-12,3.802e-12,9.352e-12,1.266e-11,1.327e-11,1.454e-11,1.663e-11,1.695e-11,2.422e-11,4.245e-11,4.368e-11,5.442e-11,1.211e-10,1.224e-10,1.455e-10,2.055e-10,2.209e-10,2.259e-10,2.478e-10,3.542e-10,3.879e-10,4.412e-10,4.553e-10,6.052e-10,6.907e-10,7.953e-10,8.319e-10,8.931e-10,1.148e-09,1.176e-09,1.275e-09,…	3L_5143224_SNP,3L_14248121_SNP,3L_5143551_SNP,3L_14248466_SNP,3L_5151615_SNP,3L_14247949_SNP,3L_5149658_DEL,3L_5143838_SNP,3L_5143183_SNP,3L_14248235_SNP,3L_14247331_INS,3L_14247149_SNP,3L_13845358_SNP,3L_13844823_SNP,3L_13844946_SNP,3L_13843556_SNP,3L_13844973_SNP,3L_13843217_SNP,3L_14248159_SNP,3L_14247329_SNP,3L_14244472_SNP,3L_5143902_SNP	4.578e-08,5.158e-08,7.919e-08,1.173e-07,1.238e-07,1.796e-07,2.065e-07,2.583e-07,4.218e-07,5.058e-07,6.709e-07,8.263e-07,8.627e-07,9.734e-07,9.783e-07,1.105e-06,1.178e-06,1.258e-06,1.647e-06,2.354e-06,2.459e-06,2.561e-06
FBgn0031936	2L	7719847	7722823	-	2L_7722775_SNP(cis)	2L_7722775_SNP,2L_7722907_SNP	8.946e-11,2.446e-10
FBgn0031950	2L	7796314	7800058	-	2L_7799166_SNP(cis),2L_7800465_SNP(cis)	2L_7799166_SNP,2L_7799198_SNP,2L_7799232_SNP,2L_7799857_SNP,2L_7799216_SNP,2L_7800465_SNP,2L_7800921_SNP	1.829e-18,1.271e-13,1.079e-09,2.436e-09,4.53e-09,5.033e-09,2.199e-08	2L_7798441_SNP,2L_7798466_SNP,2L_7793863_SNP,2L_7798700_SNP,2L_7803644_SNP,2L_7798513_SNP,2L_7798056_DEL,2L_7803595_SNP,2L_7797612_SNP,2L_7804813_SNP,2L_7797714_SNP	1.263e-15,5.629e-12,2.119e-10,4.867e-09,4.956e-09,3.252e-08,4.272e-08,4.373e-08,6.077e-08,2.435e-07,3.029e-07	3L_4352349_SNP	3.782e-07
FBgn0031971	2L	7998869	7999676	+	2L_7999063_SNP(cis),2L_8001011_SNP(trans-intra-arm),2L_7998985_SNP(cis)	2L_7999063_SNP,2L_7999055_SNP,2L_7998985_SNP,2L_7999062_SNP,2L_7999044_SNP,2L_7999409_SNP	2.288e-11,3.321e-10,5.829e-09,5.839e-09,3.47e-08,2.5e-07	2L_8002259_SNP,2L_8002340_SNP,2L_8001011_SNP,2L_8000815_SNP,2L_8003189_DEL,2L_8004075_SNP,2L_8001812_SNP,2L_8002762_SNP,2L_8001814_SNP,2L_8001668_SNP,2L_8001107_SNP,2L_8002016_SNP,2L_13330661_SNP,2L_8001918_SNP,2L_8001807_SNP,2L_8001993_SNP,2L_8001621_INS	2.631e-11,2.436e-10,3.733e-09,2.599e-08,4.691e-08,5.006e-08,5.502e-08,5.616e-08,8.006e-08,8.675e-08,1.529e-07,1.721e-07,2.015e-07,2.346e-07,3.111e-07,3.179e-07,5.126e-07
FBgn0031972	2L	7999670	8004286	-	2L_8004325_SNP(cis)	2L_8003575_SNP,2L_8004325_SNP,2L_8003569_SNP	4.555e-08,7.325e-08,1.054e-07	2L_8003077_SNP,2L_8003137_DEL	1.739e-07,2.127e-07
FBgn0031975	2L	8011405	8026898	+	2L_8025583_SNP(trans-intra-arm)			2L_8025583_SNP,2L_8025574_SNP,2L_8025578_SNP,2L_8025265_SNP,2L_8025343_SNP,2L_8025346_SNP,2L_8025631_SNP,2L_8025547_SNP,2L_8025280_SNP	1.067e-25,5.018e-21,6.151e-21,2.028e-16,1.05e-15,4.424e-15,3.023e-13,6.318e-13,2.69e-09	3L_9932162_SNP,3L_9932138_SNP	3.11e-08,3.894e-08
FBgn0031979	2L	8041106	8041879	+	2L_8041209_SNP(cis)	2L_8041209_SNP,2L_8041238_SNP,2L_8041345_SNP	1.521e-12,1.263e-08,3.148e-08
FBgn0031992	2L	8161796	8162452	-	3R_11763702_SNP(trans-inter-arm)					3R_11763702_SNP	1.017e-08
FBgn0031996	2L	8197193	8198813	+	2L_8197323_SNP(cis)	2L_8197323_SNP,2L_8197176_SNP,2L_8197664_SNP	9.254e-17,1.854e-09,1.593e-08	2L_8207148_SNP,2L_8202265_SNP,2L_8202014_SNP,2L_8194025_SNP,2L_8205472_SNP,2L_8202199_SNP,2L_8204400_SNP,2L_8185016_SNP	7.095e-12,5.049e-11,6.509e-11,2.743e-09,3.788e-09,6.473e-09,1.904e-08,2.611e-08
FBgn0031999	2L	8206171	8209637	+	2L_8198487_SNP(trans-intra-arm)	2L_8210176_SNP,2L_8205898_SNP,2L_8205948_SNP,2L_8205678_SNP,2L_8205673_SNP,2L_8205674_SNP,2L_8205647_SNP,2L_8205643_SNP,2L_8205655_DEL,2L_8205645_SNP,2L_8205640_DEL,2L_8205650_SNP,2L_8205649_SNP	3.617e-12,1.093e-11,1.479e-11,9.623e-08,1.28e-07,1.443e-07,1.887e-07,2.047e-07,2.05e-07,2.153e-07,2.306e-07,3.138e-07,4.016e-07	2L_8196533_DEL,2L_8198487_SNP,2L_8194813_SNP	2.068e-12,4.578e-12,4.443e-07
FBgn0032015	2L	8306696	8308192	-	2L_9132254_SNP(trans-intra-arm),2L_8326784_SNP(trans-intra-arm)			2L_9132366_SNP,2L_9132430_INS,2L_9132437_SNP,2L_9132254_SNP,2L_8326784_SNP	3.244e-09,3.875e-09,3.875e-09,3.966e-09,1.23e-08
FBgn0032022	2L	8327456	8332911	+	2L_8329281_SNP(trans-intra-arm)			2L_8329281_SNP,2L_8329188_SNP,2L_8329195_SNP,2L_8329151_SNP,2L_8329154_SNP,2L_8329158_SNP,2L_8328476_DEL,2L_9628105_DEL	2.503e-10,2.36e-09,2.514e-09,2.512e-08,5.587e-08,7.626e-08,1.094e-07,1.241e-07
FBgn0032025	2L	8346620	8351112	+	3R_8712288_SNP(trans-inter-arm)					3R_8712288_SNP	2.839e-08
FBgn0032059	2L	8684823	8685955	-	2L_10790313_SNP(trans-intra-arm)			2L_10790313_SNP	5.035e-08
FBgn0032079	2L	8953481	8959051	-	2L_8958154_SNP(cis),2L_8953681_SNP(cis)	2L_8958154_SNP,2L_8958153_SNP,2L_8959827_INS,2L_8953681_SNP,2L_8959991_SNP,2L_8959897_SNP,2L_8959230_SNP,2L_8959211_SNP	5.705e-25,1.461e-22,3.926e-09,6.208e-09,2.206e-08,3.945e-08,1.032e-07,1.933e-07	2L_8957927_SNP,2L_8960060_SNP,2L_8960075_SNP,2L_8960068_DEL,2L_8960079_SNP,2L_8960083_DEL,2L_8960078_SNP,2L_8960516_SNP,2L_8957786_SNP,2L_8961388_SNP,2L_8947879_SNP,2L_8960883_SNP,2L_8947834_SNP,2L_8962374_SNP,2L_8961831_SNP,2L_8961823_SNP,2L_8962587_SNP,2L_8962376_SNP,2L_8951286_SNP,2L_8950847_SNP,2L_8961359_SNP,2L_8946092_SNP,2L_8961930_SNP,2L_8962205_SNP,2L_8961200_SNP,2L_8961369_SNP,2L_896189…	5.489e-12,3.287e-11,5.824e-11,6.074e-11,7.149e-11,1.111e-10,1.17e-10,1.202e-10,7.92e-10,1.833e-09,3.073e-09,5.363e-09,5.795e-09,7.028e-09,8.434e-09,9.797e-09,2.214e-08,2.361e-08,4.417e-08,5.067e-08,5.737e-08,6.475e-08,7.011e-08,7.139e-08,7.481e-08,7.878e-08,8.185e-08,9.413e-08,9.579e-08,1.637e-07,1.748e-07,1.798e-07,2.065e-07	3L_2511842_SNP	2.785e-08
FBgn0032082	2L	8967535	8970627	+	2L_8967465_SNP(cis)	2L_8967465_SNP	9.181e-14
FBgn0032084	2L	8977834	8984872	-	2L_8980848_SNP(trans-intra-arm),X_20480152_SNP(trans-inter-arm)	2L_8984450_SNP,2L_8983874_SNP,2L_8984979_SNP,2L_8984338_SNP,2L_8985119_SNP,2L_8985141_SNP,2L_8984341_SNP,2L_8985158_SNP,2L_8984308_SNP,2L_8985147_SNP,2L_8977912_SNP,2L_8978370_INS,2L_8977935_SNP,2L_8984281_SNP,2L_8984310_SNP	1.065e-12,1.462e-12,4.503e-09,4.787e-08,1.164e-07,1.619e-07,2.091e-07,2.276e-07,3.225e-07,4.839e-07,5.334e-07,5.412e-07,8.016e-07,1.248e-06,1.365e-06	2L_8980848_SNP,2L_8981678_SNP,2L_8981924_SNP,2L_8987740_SNP,2L_8982341_SNP,2L_8982529_SNP,2L_8982322_SNP,2L_8983114_SNP,2L_8981905_SNP,2L_8981996_SNP,2L_8982190_SNP,2L_8982321_SNP,2L_8986804_SNP,2L_8981959_SNP,2L_8983480_SNP,2L_8987523_SNP,2L_8986193_SNP,2L_8979583_SNP,2L_8983630_SNP,2L_8989254_SNP,2L_8989230_SNP,2L_8979189_SNP,2L_8989258_SNP,2L_8982113_SNP,2L_8988863_SNP,2L_8987729_SNP,2L_899039…	4.273e-16,1.054e-13,2.049e-13,7.898e-13,1.891e-12,4.519e-12,9.479e-12,9.943e-12,3.026e-11,3.658e-11,6.406e-11,6.444e-11,7.004e-11,1.286e-10,1.685e-10,1.831e-10,2.448e-10,2.717e-10,3.439e-10,4.564e-10,7.79e-10,3.336e-09,4.174e-09,6.314e-09,6.555e-09,7.127e-09,8.367e-09,1.257e-08,1.329e-08,1.541e-08,2.485e-08,2.527e-08,2.696e-08,3.197e-08,4.138e-08,4.547e-08,5.536e-08,5.774e-08,6.238e-08,6.48e-08,6…	2R_4613719_SNP,X_11363719_SNP,2R_4614244_SNP,X_20480152_SNP,2R_4613673_SNP,2R_19280775_SNP,X_12028935_SNP,2R_4613895_SNP,3L_604644_SNP,X_12028938_SNP	3.62e-07,6.189e-07,6.943e-07,7.78e-07,8.211e-07,9.057e-07,1.469e-06,1.805e-06,1.91e-06,2.302e-06
FBgn0032085	2L	8991735	8993632	+	2L_14425828_SNP(trans-intra-arm)			2L_14425828_SNP	7.156e-11
FBgn0032086	2L	8994391	8995617	+	2L_8994254_SNP(cis)	2L_8994254_SNP	1.054e-08
FBgn0032101	2L	9165421	9166514	-	2L_9166087_SNP(cis),2L_9166556_DEL(cis)	2L_9166087_SNP,2L_9166859_SNP,2L_9166864_SNP,2L_9165982_SNP,2L_9166205_SNP,2L_9166556_DEL,2L_9166199_SNP,2L_9165431_SNP,2L_9166555_SNP	1.537e-11,4.216e-10,7.041e-10,1.821e-09,4.924e-09,5.79e-09,9.826e-09,1.966e-08,1.422e-07
FBgn0032117	2L	9428669	9431052	-	2L_9430897_SNP(cis)	2L_9430897_SNP,2L_9431140_DEL,2L_9431185_SNP,2L_9431196_SNP,2L_9431204_SNP,2L_9430475_SNP,2L_9431131_SNP,2L_9430440_INS	9.922e-13,3.24e-09,3.704e-09,4.176e-09,2.326e-08,2.462e-08,2.531e-08,2.928e-08
FBgn0032129	2L	9547720	9566750	-	X_15793222_SNP(trans-inter-arm)					X_15793222_SNP,X_15793259_SNP,X_15793221_SNP,X_15793254_MNP	9.698e-09,1.687e-08,2.837e-08,3.459e-08
FBgn0032131	2L	9589476	9591783	+	2L_9589337_SNP(cis)	2L_9589337_SNP,2L_9589372_SNP,2L_9589333_SNP,2L_9589357_SNP,2L_9589338_SNP,2L_9589326_SNP,2L_9589422_SNP,2L_9591667_SNP,2L_9589917_SNP,2L_9589387_SNP,2L_9592039_SNP,2L_9591946_SNP	3.224e-10,6.077e-10,5.472e-09,6.364e-09,1.839e-08,2.121e-08,3.433e-08,1.09e-07,1.268e-07,1.39e-07,3.147e-07,4.244e-07	2L_9590571_SNP,2L_9590619_SNP,2L_9588447_SNP,2L_9593461_SNP,2L_9587665_SNP,2L_9586122_SNP,2L_9587677_SNP	3.169e-09,2.777e-08,6.793e-08,7.078e-08,3.354e-07,3.758e-07,5.006e-07
FBgn0032147	2L	9782384	9788499	+	2L_9782598_SNP(cis)	2L_9782598_SNP	7.821e-13
FBgn0032160	2L	9918618	9920120	+	2L_9918471_SNP(cis)	2L_9918471_SNP,2L_9918468_SNP,2L_9918470_SNP	2.348e-09,2.586e-09,4.836e-09
FBgn0032178	2L	10060816	10063925	+	2R_8507236_SNP(trans-inter-arm),2L_9991315_SNP(trans-intra-arm)			2L_10034698_SNP,2L_9991315_SNP	8.828e-10,9.205e-10	2R_8507236_SNP,2R_8498345_SNP,2R_8506763_SNP,2R_8498404_SNP,2R_8509708_SNP	8.422e-12,9.05e-12,1.592e-11,3.479e-11,1.286e-10
FBgn0032200	2L	10254610	10255891	-	2L_10255458_SNP(cis)	2L_10255458_SNP	2.399e-08
FBgn0032210	2L	10295859	10299847	-	2L_10299100_SNP(cis)	2L_10299100_SNP,2L_10299040_SNP,2L_10299223_SNP	1.663e-08,2.046e-08,7.82e-08
FBgn0032225	2L	10344442	10347706	+	2L_10344278_SNP(cis),3L_10918259_SNP(trans-inter-arm)	2L_10344278_SNP,2L_10344316_SNP,2L_10344132_INS,2L_10344318_SNP,2L_10344160_SNP,2L_10344195_SNP,2L_10344268_SNP,2L_10344290_SNP,2L_10343561_SNP,2L_10344053_SNP	1.613e-23,2.51e-23,3.463e-23,2.065e-22,1.136e-19,1.106e-18,4.149e-16,3.555e-15,8.543e-15,9.453e-11			3L_10918259_SNP,3L_10918258_SNP,X_8165902_SNP	1.077e-09,2.035e-09,5.306e-08
FBgn0032229	2L	10356795	10358078	+	2L_10357405_SNP(cis)	2L_10357405_SNP	1.874e-13
FBgn0032234	2L	10380103	10382864	+	2L_10380125_DEL(cis),2L_10473830_SNP(trans-intra-arm),2L_10381440_SNP(trans-intra-arm)	2L_10381066_SNP,2L_10380592_SNP,2L_10380539_SNP,2L_10380125_DEL	5.411e-10,2.67e-09,2.688e-09,3.808e-09	2L_10381122_SNP,2L_10381127_SNP,2L_10473830_SNP,2L_10381440_SNP,2L_10475746_SNP,2L_5753967_SNP,2L_10473773_SNP	1.209e-09,1.209e-09,7.55e-09,8.875e-09,1.408e-08,2.242e-08,2.463e-08
FBgn0032244	2L	10419190	10420612	+	3L_6650287_INS(trans-inter-arm)					3L_6650287_INS	1.554e-08
FBgn0032247	2L	10428829	10429988	+	2L_10429059_SNP(cis)	2L_10429059_SNP	5.947e-09
FBgn0032249	2L	10432687	10435656	-	2L_10435433_SNP(cis)	2L_10435433_SNP,2L_10434725_SNP,2L_10434727_SNP,2L_10434724_SNP,2L_10435345_SNP	3.145e-13,7.212e-12,5.75e-10,5.919e-10,4.416e-09
FBgn0032252	2L	10442534	10450080	+	2L_10441035_SNP(trans-intra-arm)	2L_10442435_SNP,2L_10442271_SNP,2L_10442274_SNP,2L_10442358_SNP,2L_10442316_SNP,2L_10442361_SNP,2L_10442350_SNP,2L_10442415_INS,2L_10442305_DEL,2L_10442319_DEL,2L_10442292_SNP,2L_10442296_SNP,2L_10442340_SNP,2L_10442313_SNP,2L_10442362_SNP,2L_10442527_SNP,2L_10442339_SNP,2L_10442399_SNP	4.762e-09,5.246e-09,7.636e-09,8.287e-09,9.98e-09,1.101e-08,1.187e-08,1.837e-08,2.026e-08,2.45e-08,2.468e-08,2.639e-08,2.694e-08,3.216e-08,3.748e-08,3.937e-08,1.239e-07,1.57e-07	2L_10441035_SNP,2L_10441030_SNP,2L_10441068_SNP,2L_10441063_SNP,2L_10441013_SNP,2L_10441025_SNP,2L_10440981_SNP,2L_10440977_SNP,2L_10441054_SNP,2L_10441299_SNP,2L_10440942_SNP,2L_10441296_SNP,2L_10440941_SNP,2L_10469082_SNP,2L_10469078_SNP,2L_10440976_SNP,2L_10440997_SNP,2L_10440918_SNP,2L_10441088_SNP,2L_10441143_SNP	1.457e-16,6.06e-16,9.91e-15,9.323e-14,1.453e-13,1.691e-12,1.038e-11,6.264e-11,8.231e-11,2.784e-10,4.454e-09,4.46e-09,7.778e-09,2.528e-08,3.503e-08,1.169e-07,1.366e-07,2.672e-07,2.958e-07,4.437e-07
FBgn0032261	2L	10507081	10508032	+	2L_10507173_DEL(cis)	2L_10507173_DEL,2L_10507076_SNP,2L_10507244_SNP,2L_10507253_SNP,2L_10507265_SNP,2L_10507247_SNP,2L_10506956_SNP,2L_10506935_SNP	4.327e-13,2.126e-12,2.46e-12,7.174e-12,1.278e-11,2.173e-11,6.048e-11,1.62e-10
FBgn0032286	2L	10695000	10698043	-	2L_10698127_SNP(cis),2L_10698010_SNP(cis),3L_6197746_SNP(trans-inter-arm)	2L_10698453_SNP,2L_10697124_SNP,2L_10698703_DEL,2L_10698447_SNP,2L_10698212_SNP,2L_10698402_DEL,2L_10698397_SNP,2L_10695515_SNP,2L_10698665_SNP,2L_10695573_SNP,2L_10695749_SNP,2L_10698127_SNP,2L_10698147_SNP,2L_10698010_SNP,2L_10698616_DEL,2L_10695575_SNP,2L_10695748_SNP,2L_10698399_MNP,2L_10695514_SNP,2L_10698419_SNP,2L_10698405_MNP,2L_10698782_SNP,2L_10698785_SNP,2L_10698180_DEL,2L_10698332_SNP…	3.546e-18,5.385e-18,1.479e-17,3.805e-17,4.304e-17,5.069e-17,5.769e-17,6.223e-17,7.188e-17,7.209e-17,9.269e-17,1.363e-16,1.468e-16,1.612e-16,2.224e-16,5.617e-16,6.786e-16,6.932e-16,7.53e-16,9.175e-16,1.139e-15,5.033e-15,5.347e-15,6.231e-15,1.058e-14,2.123e-14,4.063e-14,6.419e-14,6.553e-14,9.61e-14,1.904e-13,2.887e-13,4.729e-13,1.575e-12,1.668e-12,2.297e-12,2.634e-12,3.025e-12,4.84e-12,5.848e-12,7.…	2L_10696807_SNP,2L_10696723_SNP,2L_10699634_SNP,2L_10703723_SNP,2L_10701020_SNP,2L_10701091_SNP,2L_10704918_SNP,2L_10704029_SNP,2L_10700960_SNP,2L_10700760_SNP,2L_10700035_SNP,2L_10704307_SNP,2L_10705624_SNP,2L_10704223_SNP,2L_10693672_SNP,2L_10704163_SNP,2L_14551792_SNP,2L_14551765_DEL,2L_10705607_SNP,2L_10707152_SNP,2L_10705633_SNP,2L_10705613_SNP,2L_10704121_SNP,2L_10691408_SNP,2L_10704084_SNP…	1.471e-19,2.628e-15,1.071e-13,2.374e-13,7.388e-13,2.884e-12,5.194e-11,6.387e-11,9.166e-11,9.456e-11,1.746e-10,4.258e-10,5.29e-10,6.193e-10,6.21e-10,7.164e-10,7.383e-10,8.422e-10,1.628e-09,2.294e-09,5.358e-09,5.827e-09,8.081e-09,8.682e-09,1.266e-08,1.301e-08,1.566e-08,1.695e-08,2.94e-08,3.107e-08,3.37e-08,3.481e-08,4.316e-08,7.538e-08,1.106e-07,1.192e-07,1.398e-07,1.695e-07,2.233e-07,2.289e-07,2.8…	3L_7413842_SNP,3L_6197746_SNP,3L_6197136_SNP,3R_4801266_SNP,2R_3675334_SNP,3L_7413921_SNP,3R_26120933_SNP,3R_16494152_SNP	7.669e-08,1.178e-07,1.702e-07,2.382e-07,3.062e-07,3.561e-07,5.955e-07,7.894e-07
FBgn0032290	2L	10728978	10730302	+	2L_10729177_SNP(cis)	2L_10729177_SNP,2L_10728784_SNP,2L_10729041_SNP,2L_10729872_SNP,2L_10728775_SNP,2L_10728890_SNP,2L_10730242_SNP	2.516e-11,3.919e-10,8.693e-10,1.024e-09,1.204e-09,1.555e-08,1.593e-07
FBgn0032343	2L	11110557	11113061	-	2L_11113377_SNP(cis)	2L_11113380_DEL,2L_11113377_SNP	1.112e-08,2.28e-08
FBgn0032350	2L	11151506	11155721	-	2L_11152975_SNP(trans-intra-arm),2L_11155334_SNP(cis)	2L_11155334_SNP	2.262e-08	2L_11152971_SNP,2L_11152975_SNP	2.236e-08,2.373e-08
FBgn0032378	2L	11810092	11813780	-	2L_11812234_SNP(trans-intra-arm)			2L_11812219_SNP,2L_11811883_SNP,2L_11812234_SNP	5.843e-12,6.415e-12,5.438e-10
FBgn0032382	2L	11849958	11852881	+	2L_11850125_SNP(cis),X_13867359_SNP(trans-inter-arm)	2L_11850125_SNP,2L_11850015_SNP,2L_11850078_SNP,2L_11850064_SNP,2L_11850537_SNP,2L_11850116_SNP,2L_11850534_SNP	2.041e-13,1.039e-11,3.403e-11,4.587e-11,7.601e-10,3.449e-09,1.776e-08	2L_11850987_SNP,2L_11850972_SNP,2L_3261072_SNP	2.989e-10,3.364e-08,3.784e-08	X_13867359_SNP,X_13867362_SNP,X_16721420_SNP,X_13866631_SNP,X_13866630_SNP,X_13866563_SNP	1.546e-08,1.546e-08,3.87e-08,8.377e-08,8.646e-08,1.071e-07
FBgn0032398	2L	12038631	12040689	-	2L_12041048_SNP(cis),3L_4178494_SNP(trans-inter-arm)	2L_12041048_SNP,2L_12041253_SNP,2L_12040586_SNP,2L_12041418_SNP,2L_12041592_SNP,2L_12040739_SNP,2L_12040696_MNP,2L_12040744_SNP	6.708e-11,8.686e-10,1.018e-09,1.612e-09,1.892e-09,3.907e-09,2.082e-08,1.28e-07	2L_12041801_SNP,2L_12041832_SNP	2.619e-09,6.352e-09	3L_4178494_SNP	1.233e-07
FBgn0032401	2L	12046711	12048918	-	2L_12047254_SNP(cis)	2L_12047254_SNP	2.352e-08
FBgn0032409	2L	12097838	12100839	+	2L_12099530_SNP(trans-intra-arm),2L_1828131_SNP(trans-intra-arm)	2L_12098320_SNP	9.04e-14	2L_12099530_SNP,2L_12124881_SNP,2L_12128108_SNP,2L_2410865_INS,2L_12125794_SNP,2L_12124113_SNP,2L_12096730_SNP,2L_12093739_SNP,2L_12111498_SNP,2L_12127991_SNP,2L_12109693_SNP,2L_12199580_SNP,2L_12109488_SNP,2L_12109540_SNP,2L_12652388_SNP,2L_12126432_SNP,2L_12103462_SNP,2L_12057943_SNP,2L_3359018_DEL,2L_12091893_SNP,2L_12129797_SNP,2L_12113676_SNP,2L_12110807_SNP,2L_12111720_SNP,2L_12123046_SNP,2…	6.111e-18,5.606e-15,1.34e-14,1.714e-14,1.163e-13,4.386e-13,4.8e-13,5.675e-13,5.878e-13,7.226e-13,8.068e-13,1.576e-12,2.351e-12,2.351e-12,7.168e-12,1.444e-11,1.483e-11,1.574e-11,2.23e-11,4.803e-11,5.117e-11,6.51e-11,8.885e-11,9.843e-11,1.357e-10,1.365e-10,1.803e-10,1.933e-10,2.017e-10,2.141e-10,2.199e-10,2.5e-10,2.655e-10,2.716e-10,2.863e-10,2.863e-10,3.022e-10,3.695e-10,3.695e-10,3.695e-10,3.695e…	3R_24969619_SNP,3R_24969624_SNP,X_13981136_SNP,3L_9935460_SNP,X_10383369_SNP,3R_18895214_SNP,3R_24969610_SNP	6.048e-09,5.783e-08,2.299e-07,1.105e-06,1.566e-06,1.621e-06,1.936e-06
FBgn0032431	2L	12429827	12430892	-	2L_12431009_SNP(cis)	2L_12431009_SNP,2L_12430964_SNP,2L_12429577_SNP,2L_12430928_SNP	8.261e-13,8.807e-12,1.929e-09,1.654e-08	2L_12435584_SNP	2.183e-09
FBgn0032450	2L	12700949	12704451	-	2L_12701533_SNP(cis),2L_7783858_SNP(trans-intra-arm)	2L_12701533_SNP,2L_12701436_SNP,2L_12701388_SNP,2L_12703623_SNP,2L_12701368_DEL,2L_12703837_SNP,2L_12703626_SNP,2L_12703476_SNP,2L_12703804_SNP,2L_12703454_SNP,2L_12703906_SNP,2L_12700833_SNP,2L_12701691_DEL,2L_12704693_SNP,2L_12703797_SNP,2L_12701320_SNP,2L_12703844_SNP,2L_12703907_SNP,2L_12700603_SNP	1.933e-12,6.852e-12,1.61e-09,6.633e-09,1.084e-08,3.047e-08,3.343e-08,4.524e-08,7.811e-08,7.934e-08,1.176e-07,1.28e-07,1.536e-07,3.566e-07,6.223e-07,6.324e-07,8.559e-07,8.973e-07,9.75e-07	2L_12707269_SNP,2L_12703422_SNP,2L_12703434_SNP,2L_12699899_SNP,2L_12703440_SNP,2L_12698440_SNP,2L_12709183_SNP,2L_12716836_SNP,2L_12715150_SNP,2L_12702015_SNP,2L_12699533_SNP,2L_12713589_SNP,2L_12713639_SNP,2L_12716832_SNP,2L_12673778_SNP,2L_12715096_SNP,2L_12697394_SNP,2L_12695658_SNP,2L_7783858_SNP,2L_12695124_SNP,2L_12673806_INS,2L_12695272_SNP,2L_12673826_SNP,2L_12713231_SNP	8.859e-12,1.21e-11,1.253e-11,2.935e-11,3.062e-11,3.563e-09,1.259e-08,3.284e-08,4.186e-08,4.744e-08,5.208e-08,5.501e-08,6.809e-08,8.529e-08,8.705e-08,9.419e-08,1.237e-07,1.586e-07,3.32e-07,5.134e-07,5.28e-07,5.303e-07,6.097e-07,7.947e-07
FBgn0032453	2L	12707661	12708680	+	2L_12707938_SNP(cis)	2L_12707938_SNP,2L_12708392_SNP,2L_12708433_SNP,2L_12708262_SNP,2L_12708445_SNP,2L_12708625_SNP,2L_12708624_SNP	3.737e-16,6.488e-14,6.018e-12,2.837e-11,3.616e-10,1.693e-07,2.227e-07	2L_14455718_SNP,2L_14465628_SNP,2L_12693272_SNP	2.351e-08,5.118e-08,1.239e-07	3L_10432769_SNP,3L_10432421_SNP,3R_23160987_SNP,3R_23160879_SNP,3L_10432340_DEL,3L_10432298_DEL	3.111e-09,2.344e-08,6.453e-08,9.272e-08,1.617e-07,1.973e-07
FBgn0032465	2L	12993757	13000635	-	2L_12997560_SNP(trans-intra-arm)			2L_12997560_SNP	2.036e-10
FBgn0032472	2L	13142445	13142903	-	X_21073001_SNP(trans-inter-arm)					X_21073001_SNP	5.054e-11
FBgn0032474	2L	13163209	13166072	-	2L_13165286_SNP(cis)	2L_13165286_SNP	2.087e-20	2L_13165003_SNP,2L_13168668_SNP,2L_13171421_SNP,2L_13171631_SNP,2L_13167722_SNP,2L_13159797_SNP,2L_13171517_SNP,2L_13161216_SNP	9.335e-23,3.924e-14,3.978e-09,8.571e-09,2.079e-08,2.279e-08,3.098e-08,1.1e-07
FBgn0032506	2L	13349823	13355073	-	2R_17323658_SNP(trans-inter-arm)					2R_17323658_SNP	5.805e-09
FBgn0032512	2L	13371427	13373890	-	2L_13371657_SNP(cis)	2L_13371657_SNP,2L_13371389_SNP	7.777e-11,1.91e-09
FBgn0032513	2L	13374019	13376404	+	2L_13378196_SNP(trans-intra-arm)	2L_13374246_SNP,2L_13377286_SNP,2L_13375570_SNP,2L_13375476_SNP,2L_13376701_SNP,2L_13376676_SNP	4.259e-13,5.986e-12,4.798e-09,1.541e-08,1.828e-08,1.633e-07	2L_13378628_SNP,2L_13378330_SNP,2L_13378662_SNP,2L_13378196_SNP,2L_13383452_SNP,2L_13383461_SNP,2L_13380443_SNP,2L_13346341_SNP,2L_13377622_SNP,2L_13382803_SNP,2L_13379865_SNP	2.527e-16,2.675e-16,7.494e-15,5.579e-14,5.124e-13,3.439e-12,1.135e-08,6.258e-08,1.653e-07,1.851e-07,4.221e-07	3R_22174055_SNP	1.568e-07
FBgn0032519	2L	13395360	13396184	-	2L_13396279_SNP(cis)	2L_13396279_SNP	1.512e-13
FBgn0032603	2L	16791568	16793444	+	2L_16811407_SNP(trans-intra-arm),2L_16928472_SNP(trans-intra-arm)	2L_16792454_SNP	3.667e-13	2L_16811407_SNP,2L_16812988_SNP,2L_16812419_SNP,2L_16812436_SNP,2L_16813130_SNP,2L_16780956_DEL,2L_16928472_SNP,2L_16799198_DEL	5.346e-21,1.564e-18,4.091e-18,6.231e-17,8.132e-17,2.327e-14,2.263e-12,6.582e-12
FBgn0032612	2L	16832065	16834502	-	2L_16839836_SNP(trans-intra-arm),3L_1895362_SNP(trans-inter-arm)			2L_16839836_SNP,2L_16839881_SNP	2.974e-13,8.008e-13	3L_1895362_SNP,3L_1895369_SNP,3L_1895373_SNP,3L_1895365_SNP,3L_1895370_SNP,3L_1895375_SNP,3L_1895376_SNP,3L_1895402_SNP,3L_1895353_DEL,3L_1895358_SNP,3L_1895363_SNP,3L_1895347_DEL	1.406e-11,1.406e-11,9.915e-11,1.116e-10,1.116e-10,1.116e-10,1.116e-10,1.116e-10,1.284e-10,1.284e-10,1.284e-10,5.25e-10
FBgn0032614	2L	16842300	16848716	-	2L_16847802_SNP(cis),2L_16856655_SNP(trans-intra-arm),3R_21331739_SNP(trans-inter-arm),2L_16852742_SNP(trans-intra-arm),2L_10549538_SNP(trans-intra-arm)	2L_16847802_SNP,2L_16848934_SNP,2L_16847744_SNP,2L_16847862_SNP,2L_16849366_SNP,2L_16842724_SNP,2L_16843030_SNP	2.576e-10,5.249e-10,4.269e-08,4.02e-07,1.924e-06,2.301e-06,3.003e-06	2L_16796506_SNP,2L_16852742_SNP,2L_16794587_SNP,2L_16873318_SNP,2L_16831081_SNP,2L_16797185_SNP,2L_16822745_SNP,2L_16796281_SNP,2L_16830514_SNP,2L_16946560_SNP,2L_16801918_SNP,2L_16853926_DEL,2L_16820520_SNP,2L_16936507_SNP,2L_16820377_SNP,2L_16764054_SNP,2L_16813146_SNP,2L_16822804_SNP,2L_16845058_SNP,2L_16715651_SNP,2L_16715652_SNP,2L_16805186_SNP,2L_16895254_SNP,2L_16895232_SNP,2L_16852653_SNP…	6.461e-10,6.504e-10,7.575e-10,9.356e-10,1.658e-09,1.868e-09,1.938e-09,2.034e-09,2.401e-09,2.791e-09,4.006e-09,9.949e-09,1.54e-08,1.55e-08,1.877e-08,2.323e-08,2.615e-08,2.745e-08,2.761e-08,2.945e-08,2.945e-08,3.117e-08,3.287e-08,3.681e-08,4.68e-08,4.954e-08,5.469e-08,5.501e-08,7.342e-08,8.102e-08,8.262e-08,8.859e-08,1.016e-07,1.016e-07,1.055e-07,1.16e-07,1.25e-07,1.501e-07,1.516e-07,1.674e-07,1.71…	3R_21331742_SNP,X_6832702_SNP,3L_13943643_DEL,3R_9239685_SNP,3R_21331739_SNP	1.541e-06,1.651e-06,1.715e-06,2.245e-06,3.044e-06
FBgn0032615	2L	16860029	16861489	-	2L_16861381_SNP(cis),3R_23796653_SNP(trans-inter-arm)	2L_16861381_SNP,2L_16861304_SNP,2L_16861368_SNP,2L_16861453_SNP,2L_16861464_SNP,2L_16861446_MNP,2L_16861452_SNP,2L_16861459_SNP,2L_16861536_SNP,2L_16861436_SNP,2L_16861465_INS,2L_16861508_DEL,2L_16861450_SNP,2L_16861439_DEL,2L_16861553_SNP,2L_16861552_SNP,2L_16861737_SNP,2L_16860804_SNP,2L_16860698_SNP,2L_16861111_INS,2L_16861762_SNP,2L_16861593_SNP,2L_16860652_DEL,2L_16860931_SNP,2L_16861596_SNP…	7.553e-25,1.628e-24,2.784e-23,4.132e-22,4.839e-22,6.645e-22,1.083e-21,1.457e-21,2.125e-21,2.248e-21,8.089e-21,2.016e-20,1.331e-19,1.501e-19,6.38e-19,6.404e-19,2.383e-18,9.386e-17,1.074e-16,2.482e-16,3.567e-16,5.714e-16,1.158e-15,1.53e-15,1.248e-12,2.241e-12,2.241e-12,9.939e-12,6.57e-11,2.734e-10,4.189e-10,5.46e-10,1.83e-09,2.761e-09,4.773e-09,5.533e-09,8.356e-09,1.178e-08,2.095e-08,3.403e-08,4.09…	2L_16864868_SNP,2L_16921207_SNP,2L_16864851_SNP,2L_16844843_SNP,2L_16876328_SNP,2L_16843924_SNP,2L_16864813_SNP,2L_16865964_SNP,2L_16843984_SNP,2L_16843933_SNP,2L_16791031_SNP,2L_16859015_SNP,2L_16876301_SNP,2L_16876256_SNP,2L_16977490_SNP,2L_16839812_SNP	6.882e-09,1.09e-08,2.228e-08,2.308e-08,3.523e-08,1.006e-07,1.016e-07,1.053e-07,1.619e-07,1.785e-07,2.44e-07,3.217e-07,5.203e-07,6.488e-07,7.168e-07,8.388e-07	3R_23796653_SNP,2R_5096466_SNP	1.967e-07,2.378e-07
FBgn0032629	2L	17187637	17260734	-	2L_17271671_SNP(trans-intra-arm),3R_13250520_SNP(trans-inter-arm)			2L_17271671_SNP,2L_17271592_SNP,2L_17271657_SNP,2L_17271506_SNP,2L_17271461_INS,2L_17271448_SNP,2L_17454473_SNP	2.994e-14,2.002e-10,2.327e-10,2.139e-09,1.341e-07,1.94e-07,1.951e-07	3R_13250520_SNP	9.18e-08
FBgn0032638	2L	17454263	17455923	-	2L_17451842_SNP(trans-intra-arm),2L_17468271_SNP(trans-intra-arm),3R_22376065_SNP(trans-inter-arm)			2L_17450014_SNP,2L_17451343_SNP,2L_17451687_SNP,2L_17451842_SNP,2L_17449120_SNP,2L_17467264_SNP,2L_17467279_SNP,2L_17448816_SNP,2L_17449724_SNP,2L_17449427_SNP,2L_17448348_SNP,2L_17446940_SNP,2L_17463595_SNP,2L_17468271_SNP,2L_17467784_SNP,2L_17463099_SNP,2L_17467494_SNP,2L_17448781_SNP,2L_17448080_SNP,2L_17460521_SNP,2L_17446738_SNP,2L_17427521_SNP,2L_17445422_SNP,2L_17445779_SNP,2L_17444596_SNP…	1.932e-11,5.136e-11,1.19e-10,6.267e-10,7.563e-10,7.868e-10,1.161e-09,1.384e-09,1.452e-09,1.513e-09,1.547e-09,1.584e-09,2.024e-09,3.355e-09,3.467e-09,3.535e-09,5.31e-09,6.447e-09,1.223e-08,1.379e-08,2.078e-08,2.233e-08,2.466e-08,2.764e-08,3.176e-08,3.358e-08,5.638e-08,5.784e-08,6.471e-08,8.896e-08,1.175e-07,1.188e-07,1.272e-07,2.145e-07,2.781e-07,3.515e-07,3.623e-07,3.885e-07,4.88e-07,4.905e-07,5.…	3R_22376065_SNP,3R_22377554_SNP,3R_22377765_SNP,3R_22377828_SNP	2.027e-08,2.367e-08,3.087e-08,5.712e-07
FBgn0032640	2L	17471603	17474773	+	2L_17476147_SNP(trans-intra-arm)			2L_17476147_SNP,2L_17473115_SNP,2L_17482693_SNP,2L_17488535_SNP,2L_17459033_SNP	4.216e-11,4.217e-11,2.48e-10,9.459e-10,2.498e-08
FBgn0032644	2L	17484501	17485624	+	2L_17485537_DEL(cis)	2L_17485537_DEL	6.068e-12
FBgn0032652	2L	17591315	17592299	-	2L_17582024_SNP(trans-intra-arm)			2L_17582024_SNP	1.498e-11
FBgn0032673	2L	18180884	18185007	-	2L_18184085_SNP(cis),2L_18322537_SNP(trans-intra-arm)	2L_18184085_SNP,2L_18185039_SNP,2L_18184011_DEL,2L_18184916_SNP,2L_18180353_SNP,2L_18185623_SNP,2L_18185159_SNP,2L_18180267_SNP,2L_18181257_SNP,2L_18184967_SNP,2L_18185010_SNP,2L_18185146_DEL	4.561e-21,2.209e-17,1.528e-10,6.641e-10,7.107e-10,2.334e-09,2.526e-09,3.437e-09,4.092e-09,1.364e-08,5.881e-07,4.64e-06	2L_18183896_SNP,2L_18174344_SNP,2L_18178651_SNP,2L_18182465_SNP,2L_18188011_SNP,2L_18191461_SNP,2L_18178759_SNP,2L_18188256_SNP,2L_18188299_SNP,2L_18187802_SNP,2L_18187667_SNP,2L_18186872_SNP,2L_18186043_SNP,2L_18261800_SNP,2L_18191619_SNP,2L_18191924_SNP,2L_18298126_SNP,2L_18168444_SNP,2L_18040611_SNP,2L_18191133_SNP,2L_18177090_SNP,2L_18273671_SNP,2L_18188393_SNP,2L_18171281_SNP,2L_18179860_SNP…	1.434e-13,9.167e-10,2.355e-09,2.582e-09,2.658e-09,2.811e-09,2.878e-09,2.924e-09,2.924e-09,2.985e-09,3.314e-09,3.99e-09,4.072e-09,4.848e-09,6.582e-09,7.424e-09,8.286e-09,9.865e-09,1.015e-08,1.07e-08,1.13e-08,1.378e-08,1.385e-08,1.533e-08,1.65e-08,1.693e-08,1.977e-08,2.035e-08,2.169e-08,2.191e-08,2.457e-08,2.843e-08,2.872e-08,2.956e-08,3.078e-08,3.346e-08,3.67e-08,3.773e-08,3.815e-08,4.342e-08,4.38…	3L_4956510_SNP,X_10485579_SNP,X_10488988_SNP	2.715e-06,2.747e-06,3.798e-06
FBgn0032681	2L	18472964	18484513	-	2R_4331696_SNP(trans-inter-arm),2L_10837131_SNP(trans-intra-arm),2L_22307292_SNP(trans-intra-arm)			2L_10837131_SNP,2L_10836877_SNP,2L_10836878_SNP,2L_10834717_SNP,2L_10836874_SNP,2L_22307292_SNP	1.639e-09,8.241e-09,1.16e-08,2.566e-08,6.323e-08,1.657e-07	2R_4331696_SNP,2R_4367089_SNP,2R_4342184_SNP,2R_4329613_SNP,2R_4331695_SNP,2R_4328711_SNP,2R_4320773_SNP,2R_4358153_SNP,2R_4357575_SNP,2R_9578172_SNP,3L_1026943_SNP	4.988e-10,1.236e-08,3.688e-08,4.476e-08,4.559e-08,6.235e-08,1.132e-07,1.15e-07,1.566e-07,1.735e-07,1.95e-07
FBgn0032685	2L	18517487	18531967	+	2L_18531690_SNP(cis),3R_11040617_SNP(trans-inter-arm)	2L_18531690_SNP,2L_18532213_SNP,2L_18532252_SNP,2L_18517397_SNP,2L_18517379_SNP	6.883e-13,9.376e-13,6.096e-12,5.444e-08,1.529e-07	2L_18538117_SNP,2L_18543732_SNP,2L_18522344_SNP,2L_18525556_SNP,2L_18539276_SNP,2L_18521816_SNP,2L_18515976_SNP,2L_18525328_SNP,2L_18545753_SNP,2L_18526729_SNP,2L_18545921_SNP,2L_18545964_SNP,2L_18524369_SNP,2L_18546037_SNP,2L_18518586_SNP,2L_18546053_SNP,2L_18518855_SNP,2L_18527968_SNP,2L_18528476_SNP,2L_18552795_SNP,2L_18538330_SNP,2L_18545735_SNP,2L_18545082_SNP,2L_18545074_SNP,2L_18509405_SNP…	2.216e-11,1.91e-10,3.123e-10,3.289e-10,3.636e-10,5.012e-10,5.023e-10,5.023e-10,5.221e-10,5.441e-10,5.84e-10,6.175e-10,6.457e-10,7.667e-10,9.582e-10,1.073e-09,1.132e-09,1.988e-09,2.387e-09,2.81e-09,3.899e-09,4.032e-09,5.082e-09,5.112e-09,5.151e-09,5.757e-09,5.823e-09,5.823e-09,7.686e-09,7.708e-09,8.196e-09,8.391e-09,8.984e-09,9.666e-09,9.68e-09,1.013e-08,1.097e-08,1.113e-08,1.415e-08,1.454e-08,1.8…	3R_11040617_SNP,3L_2582958_SNP,3R_26176223_SNP	3.647e-07,4.673e-07,1.129e-06
FBgn0032689	2L	18599755	18605249	-	2L_18608015_SNP(trans-intra-arm),2L_18578047_SNP(trans-intra-arm)			2L_18608015_SNP,2L_18582959_SNP,2L_18615351_SNP,2L_18578047_SNP,2L_18578053_SNP,2L_18582956_SNP,2L_18582958_SNP,2L_18625727_SNP,2L_18582957_SNP,2L_18578634_SNP,2L_18582466_SNP	1.837e-15,1.088e-14,1.952e-14,1.318e-13,1.318e-13,1.374e-13,1.58e-13,2.141e-13,2.566e-13,2.664e-13,1.552e-12
FBgn0032706	2L	18711071	18713748	-	2L_18713970_INS(cis),2L_20794032_SNP(trans-intra-arm)	2L_18713970_INS,2L_18714307_SNP,2L_18714157_SNP,2L_18713782_SNP,2L_18714176_SNP,2L_18714139_SNP	2.392e-16,3.351e-14,9.017e-13,1.561e-11,2.164e-11,3.156e-11	2L_20796414_SNP,2L_20794027_SNP,2L_20794032_SNP,2L_20803291_SNP,2L_20803297_SNP,2L_20803237_SNP,2L_20803269_SNP,2L_20798701_SNP,2L_20800294_SNP,2L_20798657_SNP,2L_20798704_INS,2L_20799687_SNP,2L_20788292_SNP,2L_20799160_SNP,2L_20799163_SNP,2L_20798887_SNP,2L_20798995_SNP,2L_20815943_SNP,2L_20798293_SNP,2L_20794703_SNP,2L_20798796_SNP,2L_20798907_SNP,2L_20799230_SNP,2L_20798472_SNP,2L_20824436_SNP…	5.654e-11,2.475e-10,2.677e-10,1.026e-09,1.129e-09,1.441e-09,1.583e-09,5.459e-09,7.21e-09,9.676e-09,1.074e-08,1.078e-08,1.104e-08,1.12e-08,1.12e-08,1.535e-08,1.73e-08,1.836e-08,5.275e-08,6.141e-08,6.237e-08,6.457e-08,6.581e-08,1.461e-07,2.217e-07,2.217e-07,2.272e-07,2.289e-07,2.508e-07
FBgn0032713	2L	18823548	18826716	+	3L_12760345_SNP(trans-inter-arm)					3L_12760345_SNP	3.397e-10
FBgn0032715	2L	18829012	18831153	-	2L_18841437_SNP(trans-intra-arm),2L_8330253_DEL(trans-intra-arm)	2L_18830377_SNP,2L_18831493_SNP,2L_18830369_SNP,2L_18831578_SNP	5.873e-10,1.595e-09,2.575e-09,6.07e-09	2L_18841437_SNP,2L_18838464_SNP,2L_18847365_SNP,2L_18820200_SNP,2L_18821544_SNP,2L_18872036_SNP,2L_18872056_INS,2L_18872058_SNP,2L_18871824_DEL,2L_18871970_SNP,2L_18872040_SNP,2L_18837698_SNP,2L_18804719_SNP,2L_8330253_DEL,2L_18804182_SNP,2L_18864757_SNP,2L_18807621_SNP,2L_18872039_SNP,2L_18823381_SNP,2L_18846037_SNP,2L_18860371_SNP,2L_18871843_SNP,2L_18883115_SNP,2L_18921385_SNP,2L_18823370_SNP,…	3.407e-10,1.564e-09,1.699e-09,4.127e-09,4.76e-09,6.015e-09,6.015e-09,6.015e-09,6.442e-09,7.26e-09,1.1e-08,1.921e-08,1.981e-08,3.235e-08,3.423e-08,3.924e-08,4.199e-08,4.481e-08,4.52e-08,4.54e-08,1.706e-07,1.744e-07,2.196e-07,3.258e-07,3.311e-07,3.749e-07	3L_3783243_SNP	2.935e-07
FBgn0032733	2L	18988268	18990233	-	2L_18989784_SNP(cis),2L_18990210_SNP(cis)	2L_18989784_SNP,2L_18989825_SNP,2L_18989864_SNP,2L_18990182_SNP,2L_18990224_SNP,2L_18990210_SNP,2L_18989874_SNP,2L_18989983_SNP,2L_18989294_SNP,2L_18987573_SNP	2.032e-14,1.573e-13,1.861e-13,3.637e-13,4.362e-12,6.938e-12,3.698e-10,4.902e-09,1.358e-08,5.533e-08	2L_18991607_SNP,2L_18982408_SNP	6.03e-08,1.483e-07
FBgn0032734	2L	18991020	18992409	+	2L_18990933_SNP(cis)	2L_18990933_SNP	2.575e-10
FBgn0032772	2L	19380930	19383093	+	2R_4153879_SNP(trans-inter-arm)					2R_4153879_SNP	4.903e-10
FBgn0032783	2L	19435850	19442727	-	2L_19489346_SNP(trans-intra-arm),3R_12897752_SNP(trans-inter-arm)	2L_19436835_SNP	3.403e-08	2L_19489346_SNP,2L_19486468_SNP,2L_19431028_SNP,2L_19428608_SNP,2L_19459515_SNP,2L_19429485_SNP,2L_19428327_SNP,2L_19484253_SNP,2L_19500570_SNP,2L_19429196_SNP,2L_19463743_DEL,2L_19419125_SNP,2L_15274491_SNP,2L_19430776_SNP,2L_19477502_SNP	2.717e-08,2.913e-08,4.776e-08,8.398e-08,8.897e-08,1.136e-07,1.611e-07,2.605e-07,2.658e-07,3.012e-07,3.124e-07,3.236e-07,4.913e-07,5.252e-07,5.557e-07	3R_12897072_SNP,3R_12897752_SNP	1.086e-07,3.857e-07
FBgn0032793	2L	19491647	19493253	-	2L_19493263_SNP(cis),3R_24324119_DEL(trans-inter-arm)	2L_19493263_SNP,2L_19492942_SNP,2L_19493563_SNP	8.206e-20,2.744e-19,6.568e-09	2L_19470139_SNP,2L_19481166_SNP,2L_19464700_SNP,2L_19573856_SNP,2L_19481903_SNP,2L_19475533_SNP,2L_19477988_INS,2L_19575626_SNP,2L_19586930_SNP,2L_19574577_SNP,2L_19479080_DEL,2L_19580292_SNP,2L_19579707_SNP,2L_19572137_SNP,2L_19585634_SNP,2L_19479169_SNP,2L_19490572_SNP,2L_19589514_SNP,2L_19506862_SNP,2L_19485260_SNP,2L_19589913_SNP,2L_19572081_SNP,2L_19590587_SNP,2L_19582112_SNP,2L_19486778_SNP…	3.79e-19,4.333e-19,6.425e-17,1.955e-16,3.722e-16,4.291e-16,7.646e-14,3.976e-13,4.32e-13,9.363e-13,9.799e-13,1.103e-12,1.109e-12,1.136e-12,1.401e-12,2.235e-12,2.883e-12,4.209e-12,9.054e-12,9.554e-12,1.225e-11,2.775e-11,4.778e-11,6.305e-11,6.317e-11,2.482e-10,2.628e-10,3.068e-10,3.824e-10,3.836e-10,6.143e-10,6.535e-10,7.226e-10,8.792e-10,1.055e-09,1.393e-09,1.61e-09,1.697e-09,1.822e-09,2.006e-09,2.…	2R_1329841_SNP,X_6403922_SNP,3R_24324119_DEL,2R_3675947_SNP	2.31e-07,2.329e-07,2.827e-07,7.146e-07
FBgn0032801	2L	19526910	19530305	-	2L_19528054_SNP(trans-intra-arm)	2L_19527710_SNP,2L_19527183_SNP,2L_19526340_SNP,2L_19526145_SNP,2L_19527301_SNP,2L_19527247_SNP,2L_19526975_SNP,2L_19526630_SNP,2L_19526600_SNP,2L_19530531_SNP,2L_19529704_SNP,2L_19527065_SNP,2L_19526750_SNP,2L_19527105_SNP	1.13e-14,6.969e-13,4.697e-12,8.644e-11,1.021e-10,1.777e-10,2.894e-10,4.573e-09,6.95e-09,2.43e-08,3.265e-08,4.677e-08,6.965e-08,1.091e-07	2L_19528054_SNP,2L_19531989_SNP,2L_19533970_SNP,2L_19533250_SNP,2L_19533445_SNP,2L_19462029_SNP,2L_19520093_SNP,2L_19533795_SNP,2L_6210432_SNP,2L_19513783_SNP,2L_19522029_SNP,2L_19533601_SNP	3.036e-15,5.248e-11,3.982e-09,6.092e-09,1.399e-08,7.465e-08,1.225e-07,1.483e-07,1.532e-07,1.615e-07,1.929e-07,3.434e-07
FBgn0032822	2L	19792104	19792782	+	2L_19792036_SNP(cis),3R_11658308_SNP(trans-inter-arm)	2L_19792774_SNP,2L_19792817_SNP,2L_19792036_SNP,2L_19792731_SNP,2L_19792191_SNP,2L_19792739_SNP,2L_19792665_SNP,2L_19792463_SNP,2L_19792476_SNP,2L_19793714_DEL,2L_19792115_SNP,2L_19792506_SNP,2L_19792536_SNP	6.288e-18,6.686e-18,3.598e-17,3.949e-17,3.998e-17,7.12e-17,2.155e-16,1.092e-10,1.302e-10,1.247e-08,2.506e-07,1.428e-06,2.211e-06	2L_19790824_SNP,2L_19794717_SNP,2L_19794695_SNP,2L_19794789_SNP,2L_19794454_SNP,2L_19765108_DEL,2L_19793891_INS,2L_19794504_SNP,2L_19774411_SNP,2L_19782957_DEL,2L_19803809_SNP,2L_19774376_DEL,2L_19776472_SNP,2L_19782967_SNP,2L_19774409_SNP,2L_19767040_SNP,2L_19773262_SNP,2L_19797115_SNP,2L_19759679_SNP,2L_19774401_SNP,2L_19774413_SNP,2L_19786022_SNP,2L_19774402_SNP,2L_19781706_SNP,2L_19778936_DEL…	1.004e-16,1.056e-16,1.072e-16,1.837e-16,1.707e-15,2.229e-15,2.256e-15,2.315e-15,5.176e-15,1.109e-14,1.365e-14,1.418e-14,1.435e-14,1.673e-14,1.749e-14,1.761e-14,1.924e-14,3.142e-14,3.657e-14,3.666e-14,3.971e-14,4.129e-14,6.812e-14,7.224e-14,8.349e-14,8.362e-14,8.391e-14,8.69e-14,8.822e-14,8.976e-14,9.852e-14,1.104e-13,1.109e-13,1.129e-13,1.294e-13,1.306e-13,1.454e-13,1.469e-13,1.547e-13,1.554e-13,…	3R_11658308_SNP,X_11846986_SNP,3L_876217_INS,3L_8901825_SNP,X_7515551_SNP,2R_19899436_SNP,2R_7960822_SNP,2R_15572265_SNP	1.64e-06,4.139e-06,4.747e-06,6.653e-06,7.798e-06,8.76e-06,9.191e-06,9.428e-06
FBgn0032836	2L	19964136	19965702	+	2L_19968482_SNP(trans-intra-arm),2L_19967553_SNP(trans-intra-arm)	2L_19965304_SNP,2L_19965998_SNP,2L_19964090_SNP,2L_19964089_SNP,2L_19966346_SNP,2L_19964200_SNP,2L_19965421_SNP,2L_19965547_SNP,2L_19965651_SNP,2L_19965646_SNP,2L_19965659_SNP,2L_19965589_SNP,2L_19965593_SNP,2L_19965643_SNP,2L_19965481_SNP,2L_19964218_SNP,2L_19965406_SNP,2L_19965066_SNP,2L_19965752_SNP,2L_19966540_SNP,2L_19963585_SNP,2L_19965776_SNP,2L_19965787_SNP,2L_19965788_SNP,2L_19964052_SNP…	1.492e-19,2.274e-19,8.224e-17,1.865e-16,1.928e-15,2.366e-15,2.357e-14,9.699e-14,1.043e-13,1.22e-13,2.021e-13,3.775e-13,5.778e-13,1.621e-12,3.239e-12,3.993e-12,9.375e-12,2.139e-11,2.483e-11,4.74e-11,5.121e-11,6.328e-11,1.33e-10,1.662e-10,2.16e-10,4.498e-10,7.141e-09,1.054e-08,1.761e-08,3.533e-08,3.951e-08,1.483e-07,4.041e-07,9.85e-07,1.458e-06,1.803e-06,1.962e-06,3.624e-06,3.966e-06,5.108e-06,5.84…	2L_19968510_SNP,2L_19967616_SNP,2L_19967103_SNP,2L_19967461_SNP,2L_19967918_SNP,2L_19968482_SNP,2L_19967949_SNP,2L_19967914_INS,2L_19960173_SNP,2L_19957532_SNP,2L_19966861_SNP,2L_19932361_SNP,2L_19960044_SNP,2L_19967283_SNP,2L_19926855_SNP,2L_19960621_SNP,2L_19954669_SNP,2L_19975138_SNP,2L_19971395_SNP,2L_19953646_SNP,2L_19956115_SNP,2L_19954115_SNP,2L_19967747_SNP,2L_19957421_SNP,2L_19967553_SNP…	5.164e-21,5.282e-21,1.059e-20,1.153e-20,7.88e-20,9.784e-20,7.829e-19,5.319e-18,4.124e-17,1.592e-16,2.207e-16,3.283e-16,1.064e-15,1.19e-15,2.302e-15,3.19e-15,4.257e-15,4.905e-15,8.002e-15,9.897e-15,1.205e-14,2.033e-14,2.06e-14,2.136e-14,4.622e-14,8.468e-14,1.484e-13,2.501e-13,4.429e-13,5.177e-13,1.148e-12,2.314e-12,2.771e-12,3.066e-12,3.8e-12,4.575e-12,7.87e-12,8.771e-12,9.171e-12,1.092e-11,1.111e…	2R_2584384_SNP,2R_15814202_SNP,2R_10609563_SNP,X_9666282_SNP,3R_2304603_SNP,X_9666279_SNP,3L_12870401_SNP,X_9666274_SNP,3R_17341141_SNP,X_1345650_SNP,3R_22513907_SNP,3R_22512830_SNP,2R_19186459_DEL,2R_18898455_SNP,X_3798263_SNP,X_9666284_SNP,X_15739594_SNP	1.052e-06,2.5e-06,2.629e-06,4.434e-06,5.39e-06,5.522e-06,5.869e-06,6.647e-06,7.056e-06,7.41e-06,7.734e-06,8.34e-06,8.835e-06,8.864e-06,9.218e-06,9.454e-06,9.665e-06
FBgn0032839	2L	20024975	20025811	-	2L_20023803_SNP(trans-intra-arm),2L_20028157_DEL(trans-intra-arm)	2L_20024692_SNP,2L_20024446_SNP,2L_20024575_SNP,2L_20025423_INS,2L_20024555_SNP,2L_20024093_SNP,2L_20024579_INS,2L_20024078_SNP,2L_20024099_SNP,2L_20024136_SNP,2L_20024066_SNP,2L_20024195_SNP,2L_20024183_SNP,2L_20024200_DEL,2L_20024397_SNP,2L_20024360_SNP,2L_20024515_SNP,2L_20024337_INS,2L_20024348_SNP,2L_20026288_SNP,2L_20026217_SNP,2L_20024246_INS,2L_20026060_SNP,2L_20026120_DEL,2L_20026178_SNP…	2.127e-22,8.106e-22,8.304e-22,9.134e-21,9.247e-21,3.598e-20,5.429e-20,7.293e-20,9.742e-20,1.134e-19,1.164e-19,1.668e-19,2.568e-19,3.197e-19,5.415e-19,6.852e-18,2.585e-17,3.64e-17,1.675e-16,3.175e-16,5.322e-16,4.11e-14,6.338e-13,7.777e-12,1.105e-11,1.585e-10,2.235e-10,1.71e-09,9.269e-09,6.977e-08,7.933e-08,5.227e-07,5.442e-07,1.119e-06,7.678e-06	2L_20023803_SNP,2L_20031309_SNP,2L_20022036_SNP,2L_20023801_SNP,2L_20023793_SNP,2L_20023799_SNP,2L_20042638_SNP,2L_20032589_SNP,2L_20041942_SNP,2L_20041970_SNP,2L_20039852_SNP,2L_20041071_SNP,2L_20031473_SNP,2L_20033302_SNP,2L_20034222_SNP,2L_20041582_SNP,2L_20030958_SNP,2L_20039894_SNP,2L_20043674_SNP,2L_20035833_SNP,2L_20039144_SNP,2L_20037667_SNP,2L_20029987_SNP,2L_20040021_SNP,2L_20042732_SNP…	7.373e-24,1.383e-23,1.454e-23,6.799e-23,2.682e-22,2.741e-22,3.484e-22,3.755e-22,1.772e-21,2.978e-21,6.378e-21,7.14e-21,7.297e-21,8.017e-21,8.084e-21,8.156e-21,9.902e-21,1.118e-20,1.324e-20,1.484e-20,2.956e-20,3.568e-20,5.59e-20,5.855e-20,6.831e-20,9.376e-20,1.051e-19,1.179e-19,1.253e-19,1.325e-19,1.325e-19,1.618e-19,1.833e-19,1.98e-19,2.096e-19,2.637e-19,3.659e-19,5.577e-19,8.585e-19,1.311e-18,1.…	2R_17944344_SNP,3L_15420539_SNP,2R_14233282_SNP,X_19618183_SNP,3L_11138322_SNP,3R_10791654_SNP,X_17506389_SNP,3R_14672743_SNP	1.192e-06,3.487e-06,4.767e-06,6.133e-06,6.161e-06,7.372e-06,9.234e-06,9.255e-06
FBgn0032843	2L	20070081	20072195	-	2L_20075275_SNP(trans-intra-arm),X_7413726_SNP(trans-inter-arm)	2L_20071309_SNP,2L_20069086_SNP,2L_20070916_SNP,2L_20070946_SNP,2L_20070922_SNP,2L_20072985_SNP,2L_20072960_SNP,2L_20069651_SNP,2L_20069650_SNP,2L_20072015_SNP,2L_20071507_SNP,2L_20071390_SNP,2L_20069732_SNP,2L_20072597_SNP,2L_20072060_SNP,2L_20072139_SNP	1.848e-12,1.897e-12,5.532e-11,6.626e-11,1.51e-10,1.834e-09,2.751e-09,1.696e-08,1.832e-08,2.075e-08,4.527e-08,9.738e-08,2.314e-07,3.123e-07,8.413e-07,9.301e-07	2L_20075275_SNP,2L_20076366_SNP,2L_20077398_SNP,2L_20080899_DEL,2L_20077437_SNP,2L_20065485_SNP,2L_20077425_SNP,2L_20065395_SNP,2L_20077402_SNP,2L_20073727_SNP,2L_20065524_SNP,2L_20075283_SNP,2L_20106312_SNP,2L_20080744_SNP,2L_20054472_SNP,2L_20073829_SNP,2L_20050376_SNP,2L_20076066_SNP,2L_20080811_SNP,2L_20080016_SNP,2L_20105419_SNP,2L_20080126_SNP,2L_20073778_SNP,2L_20079384_SNP,2L_20065470_SNP…	1.64e-13,1.197e-11,1.83e-11,4.892e-11,1.124e-10,1.438e-10,1.805e-10,2.409e-10,3.229e-10,3.699e-10,5.026e-10,5.624e-10,8.066e-10,8.194e-10,9.052e-10,9.613e-10,1.132e-09,1.413e-09,1.72e-09,1.916e-09,2.041e-09,2.203e-09,2.268e-09,2.274e-09,2.543e-09,2.802e-09,3.434e-09,4.385e-09,5.31e-09,5.563e-09,5.648e-09,9.747e-09,1.039e-08,1.059e-08,1.063e-08,1.137e-08,1.326e-08,1.416e-08,1.423e-08,1.454e-08,1.4…	X_7413726_SNP,X_18114629_SNP,X_3547110_SNP,3L_2680581_SNP,2R_17775177_SNP,3L_3943789_SNP,2R_2594079_SNP	9.101e-09,3.022e-07,5.348e-07,6.025e-07,6.907e-07,8.612e-07,9.194e-07
FBgn0032848	2L	20093972	20096253	+	2L_20300327_SNP(trans-intra-arm)			2L_20300429_SNP,2L_20300432_SNP,2L_20300327_SNP	2.592e-09,2.592e-09,3.434e-09
FBgn0032850	2L	20097581	20103375	+	2L_20099059_SNP(trans-intra-arm)			2L_20099059_SNP,2L_20099009_SNP,2L_20100073_SNP,2L_20096496_SNP,2L_20082130_SNP,2L_20067873_SNP,2L_20086642_SNP,2L_20067857_SNP,2L_20082678_SNP,2L_20068525_SNP,2L_20067833_DEL,2L_20069275_SNP,2L_20089722_SNP,2L_20070030_SNP,2L_20057409_SNP,2L_20076366_SNP,2L_20078945_SNP,2L_20101326_SNP	6.242e-09,1.287e-08,4.244e-08,4.392e-08,5.43e-08,1.052e-07,1.593e-07,1.739e-07,1.739e-07,1.761e-07,1.802e-07,1.802e-07,1.921e-07,2.12e-07,3.772e-07,4.362e-07,4.691e-07,5.102e-07
FBgn0032869	2L	20642306	20643244	-	2L_20643018_SNP(cis),3L_12853709_SNP(trans-inter-arm)	2L_20643018_SNP,2L_20643153_SNP,2L_20643143_SNP,2L_20643596_SNP,2L_20643750_SNP,2L_20642420_SNP,2L_20644011_SNP,2L_20642844_SNP,2L_20643509_SNP,2L_20644062_SNP	2.207e-31,1.232e-29,2.304e-26,1.121e-11,1.494e-11,3.625e-10,2.588e-08,3.627e-08,6.449e-08,2.493e-07	2L_20650343_SNP,2L_20640160_SNP,2L_20639021_SNP,2L_20632623_SNP,2L_20640088_SNP,2L_20639427_SNP,2L_20640292_SNP,2L_20639378_DEL,2L_20639514_SNP,2L_20648665_SNP,2L_20666989_SNP,2L_20640828_SNP,2L_20634526_SNP,2L_20647954_SNP,2L_20659060_SNP,2L_20652063_SNP,2L_20639456_SNP,2L_20639457_SNP,2L_20652308_SNP,2L_20661436_SNP,2L_20639101_INS,2L_20639094_DEL,2L_20695394_SNP,2L_20647576_SNP,2L_20664839_SNP…	9.817e-20,1.2e-15,5.269e-12,1.372e-11,2.551e-11,4.864e-11,4.933e-11,5.528e-10,5.528e-10,8.982e-10,1.545e-09,1.565e-09,1.734e-09,1.764e-09,1.776e-09,2.852e-09,3.011e-09,3.921e-09,5.395e-09,1.226e-08,1.805e-08,2.068e-08,5.336e-08,5.383e-08,6.01e-08,7.212e-08,8.357e-08,1.34e-07,1.351e-07,1.369e-07,1.528e-07,1.609e-07,1.713e-07,1.799e-07,1.822e-07,2.228e-07,2.472e-07,2.938e-07,3.244e-07,4.222e-07	3L_12853709_SNP	3.321e-08
FBgn0032889	2L	20822828	20827744	+	2L_20827629_SNP(cis),X_14309466_SNP(trans-inter-arm)	2L_20827629_SNP,2L_20822652_SNP,2L_20822648_SNP,2L_20822713_SNP,2L_20827801_SNP,2L_20823459_SNP,2L_20823471_SNP,2L_20823591_SNP,2L_20823068_SNP,2L_20823586_SNP,2L_20828659_SNP	7.209e-11,2.345e-10,9.749e-10,2.283e-09,2.361e-08,4.225e-08,4.717e-08,6.624e-08,6.71e-08,9.702e-08,9.791e-08	2L_20824759_SNP,2L_20828902_SNP,2L_20829766_SNP,2L_20821335_SNP,2L_20830783_SNP,2L_20821281_SNP,2L_20821285_SNP,2L_20821282_SNP,2L_20818563_SNP,2L_20821270_SNP,2L_20821269_SNP	2.255e-09,3.207e-09,3.269e-08,1.504e-07,1.505e-07,1.666e-07,1.936e-07,2.05e-07,2.082e-07,2.337e-07,3.412e-07	3R_10255305_DEL,X_14309466_SNP	9.075e-08,4.629e-07
FBgn0032899	2L	20865215	20867709	+	2L_20866533_INS(trans-intra-arm)			2L_20866533_INS	8.952e-10
FBgn0032900	2L	20869854	20871565	+	2L_20869780_SNP(cis)	2L_20869780_SNP,2L_20869267_SNP	5.923e-10,1.161e-08	2L_20854656_SNP,2L_20856301_SNP,2L_20779991_SNP,2L_20856280_SNP,2L_20859548_SNP	4.193e-09,2.957e-08,1.415e-07,1.428e-07,1.971e-07
FBgn0032901	2L	20871335	20918931	-	2L_20889028_SNP(trans-intra-arm)			2L_20889028_SNP,2L_20874301_SNP	7.214e-10,7.577e-09
FBgn0032910	2L	21057706	21071502	-	2L_21071538_SNP(cis)	2L_21071538_SNP,2L_21071486_SNP	6.877e-24,4.671e-11	2L_21084693_SNP	2.674e-13
FBgn0032943	2L	21344607	21358271	+	2L_21267840_INS(trans-intra-arm)	2L_21344606_SNP	6.241e-08	2L_21267840_INS,2L_21277750_SNP,2L_21361803_SNP,2L_21242612_SNP,2L_21367661_SNP,2L_21279249_INS,2L_21082606_SNP,2L_21367660_SNP,2L_21329355_SNP,2L_21356061_SNP,2L_21279251_SNP	3.19e-09,5.424e-09,5.778e-09,6.154e-09,7.869e-09,1.294e-08,2.166e-08,2.723e-08,5.336e-08,5.533e-08,9.688e-08
FBgn0032997	2R	506535	508338	+	2R_511763_SNP(trans-intra-arm),2R_57932_SNP(trans-intra-arm)	2R_507479_SNP,2R_505989_SNP,2R_506302_SNP,2R_506429_DEL,2R_506675_SNP	2.224e-11,5.298e-10,1.457e-09,3.284e-07,9.673e-07	2R_511763_SNP,2R_503964_SNP,2R_503971_SNP,2R_490998_SNP,2R_510069_SNP,2R_503997_SNP,2R_502780_SNP,2R_510054_SNP,2R_510050_SNP,2R_503978_DEL,2R_510048_SNP,2R_57932_SNP,2R_492107_DEL,2R_392525_SNP,2R_490697_SNP,2R_519465_SNP,2R_410467_SNP,2R_423567_SNP,2R_504006_SNP,2R_421940_SNP,2R_60628_SNP,2R_488958_SNP,2R_559289_SNP,2R_392539_SNP,2R_520421_SNP,2R_489609_SNP,2R_409302_SNP,2R_420382_SNP,2R_559302…	4.869e-13,1.432e-11,2.05e-11,4.034e-11,1.088e-10,1.121e-10,1.623e-10,4.622e-10,4.918e-10,4.993e-10,5.612e-10,1.302e-09,2.281e-09,3.702e-09,3.727e-09,4.285e-09,4.995e-09,1.017e-08,1.045e-08,1.201e-08,2.166e-08,2.914e-08,3.82e-08,3.915e-08,4.101e-08,4.344e-08,5.264e-08,5.459e-08,5.605e-08,6.108e-08,6.523e-08,6.704e-08,6.962e-08,7.21e-08,7.433e-08,8.249e-08,8.368e-08,8.414e-08,8.671e-08,8.828e-08,9.…	2L_22443140_SNP,2L_22443017_SNP,X_591246_SNP,2L_8452388_SNP,3L_12601011_SNP,2L_22945248_INS,X_14564289_SNP,2L_22432434_SNP,2L_22446523_DEL,2L_17754616_DEL,X_591275_SNP,2L_22474409_INS,2L_22872496_SNP,2L_22452878_SNP	9.1e-08,1.705e-07,6.494e-07,9.955e-07,1.186e-06,1.583e-06,2.691e-06,3.834e-06,3.887e-06,5.57e-06,6.233e-06,6.375e-06,6.472e-06,6.523e-06
FBgn0033000	2R	716751	718092	+	2R_709026_SNP(trans-intra-arm)			2R_709026_SNP,2R_891369_SNP,2R_841678_SNP,2R_774997_SNP,2R_966428_SNP,2R_953099_SNP,2R_741688_SNP,2R_894750_SNP,2R_894656_SNP,2R_767016_SNP,2R_890555_SNP,2R_842201_SNP,2R_890603_SNP,2R_868720_SNP,2R_592019_SNP,2R_960171_SNP,2R_703643_SNP,2R_629612_DEL,2R_743617_SNP,2R_560516_SNP,2R_591732_SNP,2R_596915_SNP,2R_738506_SNP,2R_828167_SNP,2R_838201_SNP,2R_884489_SNP,2R_892294_SNP,2R_796957_SNP,2R_8219…	2.563e-14,5.826e-14,1.762e-13,4.653e-13,1.208e-12,1.3e-12,1.738e-12,2.146e-12,2.267e-12,2.363e-12,2.864e-12,4.117e-12,5.718e-12,8.07e-12,8.611e-12,1.003e-11,1.182e-11,1.259e-11,1.308e-11,1.322e-11,1.555e-11,1.599e-11,2.01e-11,2.397e-11,2.742e-11,3.758e-11,4.222e-11,4.502e-11,4.551e-11,5.435e-11,7.747e-11,9.315e-11,9.351e-11,1.632e-10,1.642e-10,4.952e-10,5.814e-10,6.221e-10,6.379e-10,7.507e-10,1.0…	X_10259155_SNP	1.038e-06
FBgn0033027	2R	1390942	1395371	-	2L_13841068_SNP(trans-inter-arm),2R_1398020_SNP(trans-intra-arm)			2R_1398020_SNP,2R_1404686_SNP	3.968e-09,1.224e-08	2L_13841068_SNP,2L_13841073_SNP,2L_13841082_SNP,2L_19368256_INS	1.041e-10,1.041e-10,2.409e-09,5.657e-09
FBgn0033031	2R	1555888	1557491	+	2R_1555030_SNP(cis),2R_1663589_SNP(trans-intra-arm)	2R_1555030_SNP,2R_1554972_SNP,2R_1555009_INS,2R_1557976_SNP,2R_1555273_SNP,2R_1555310_SNP,2R_1555392_SNP	1.469e-11,6.706e-11,1.804e-10,3.187e-09,9.414e-08,9.622e-08,5.048e-07	2R_1522804_SNP,2R_1551851_SNP,2R_1536428_SNP,2R_1531982_SNP,2R_1547429_SNP,2R_1551349_SNP,2R_1551293_SNP,2R_1551973_SNP,2R_1552524_SNP,2R_1554309_SNP,2R_1552708_SNP,2R_1547481_SNP,2R_1522797_SNP,2R_1539214_SNP,2R_1534447_SNP,2R_1545853_SNP,2R_1547721_SNP,2R_1546091_SNP,2R_1531550_SNP,2R_1552962_SNP,2R_1546341_SNP,2R_1540166_SNP,2R_1496166_SNP,2R_1554800_SNP,2R_1535651_SNP,2R_1563107_SNP,2R_162336…	2.449e-13,1.141e-12,1.28e-12,1.412e-12,3.377e-12,9.067e-12,9.666e-12,1.029e-11,1.116e-11,1.122e-11,1.185e-11,1.186e-11,1.389e-11,1.463e-11,1.482e-11,1.534e-11,2.742e-11,3.111e-11,5.293e-11,5.677e-11,8.17e-11,9.418e-11,1.463e-10,1.506e-10,1.577e-10,1.906e-10,3.39e-10,4.668e-10,4.949e-10,5.688e-10,6.727e-10,6.843e-10,8.104e-10,8.726e-10,9.162e-10,1.088e-09,1.105e-09,1.568e-09,1.591e-09,1.673e-09,1.…	X_15415808_SNP,2L_12686469_SNP,2L_4335956_SNP,2L_4337465_SNP	3.557e-08,1.044e-07,3.647e-07,6.128e-07
FBgn0033055	2R	1930037	1932469	+	2R_1930175_DEL(cis),2R_17836375_SNP(trans-intra-arm)	2R_1930175_DEL,2R_1931029_SNP,2R_1929761_SNP,2R_1929687_SNP,2R_1930744_SNP,2R_1931898_SNP,2R_1930809_SNP	1.081e-10,1.566e-10,6.081e-09,1.182e-08,2.831e-08,3.464e-06,5.704e-06	2R_1878989_SNP,2R_1944196_SNP,2R_1934875_SNP,2R_1935846_SNP,2R_1940252_SNP,2R_1928179_DEL,2R_1934317_SNP,2R_1868302_SNP,2R_1968263_SNP,2R_1964570_SNP,2R_1906115_SNP,2R_1950765_SNP,2R_1894602_SNP,2R_1887525_SNP,2R_1896730_SNP,2R_1886837_SNP,2R_1889604_SNP,2R_1912810_SNP,2R_1927477_SNP,2R_1885115_SNP,2R_1945483_SNP,2R_1923985_INS,2R_1981539_SNP,2R_1889486_SNP,2R_1891574_SNP,2R_1884274_SNP,2R_187486…	3.73e-13,5.528e-13,8.171e-13,7.73e-12,1.082e-11,1.282e-11,1.846e-11,1.851e-11,6.969e-11,7.041e-11,7.808e-11,8.104e-11,8.635e-11,9.997e-11,1.375e-10,1.46e-10,1.676e-10,1.701e-10,1.71e-10,1.759e-10,1.883e-10,2.025e-10,2.077e-10,2.098e-10,2.36e-10,2.527e-10,2.741e-10,2.884e-10,3.999e-10,4.094e-10,4.094e-10,4.192e-10,4.372e-10,5.02e-10,5.131e-10,5.92e-10,6.315e-10,6.875e-10,6.993e-10,7.322e-10,8.324e…	3L_11419811_SNP,X_14227975_INS,3L_890602_SNP,2L_14481565_SNP,3L_11419593_SNP,X_14228001_SNP,2L_12469340_SNP,3L_9166549_SNP,3L_18411596_SNP,3L_11419773_SNP	1.044e-06,1.407e-06,1.706e-06,1.802e-06,3.393e-06,3.443e-06,3.461e-06,3.605e-06,5.394e-06,5.719e-06
FBgn0033059	2R	1961976	1963872	-	2R_1961236_SNP(cis),3L_11011935_SNP(trans-inter-arm),2R_1963863_SNP(cis)	2R_1961236_SNP,2R_1963863_SNP,2R_1961064_SNP,2R_1963783_SNP,2R_1961063_SNP,2R_1962194_SNP,2R_1962463_SNP,2R_1961856_SNP,2R_1962909_SNP,2R_1963881_SNP,2R_1964570_SNP,2R_1964090_SNP,2R_1964823_SNP,2R_1962450_SNP,2R_1961840_SNP,2R_1964712_SNP,2R_1963353_SNP	1.652e-21,3.649e-20,1.786e-19,2.517e-19,7.193e-19,7.333e-19,1.857e-18,4.464e-18,8.002e-18,4.082e-13,1.544e-09,1.16e-08,1.445e-07,4.009e-07,4.042e-07,7.514e-07,1.392e-06	2R_1959823_SNP,2R_1928662_SNP,2R_1967078_SNP,2R_1960518_SNP,2R_1937955_SNP,2R_1933522_SNP,2R_1931898_SNP,2R_1928179_DEL,2R_1973683_SNP,2R_1918247_SNP,2R_1931897_SNP,2R_1954558_SNP,2R_1933854_SNP,2R_1921256_SNP,2R_1924632_SNP,2R_1918180_SNP,2R_1926693_DEL,2R_1930744_SNP,2R_1933398_SNP,2R_2008496_SNP,2R_1966100_SNP,2R_1930809_SNP,2R_1893895_SNP,2R_1953915_SNP,2R_1952854_SNP,2R_1923887_SNP,2R_189380…	1.288e-18,1.488e-17,2.768e-17,1.749e-15,1.946e-15,5.82e-15,1.209e-14,1.911e-14,3.145e-14,3.255e-14,4.391e-14,1.189e-13,2.501e-13,3.353e-13,5.67e-13,7.665e-13,7.697e-13,1.117e-12,1.378e-12,2.652e-12,5.972e-12,6.585e-12,7.373e-12,8.67e-12,1.178e-11,1.303e-11,1.891e-11,2.027e-11,2.118e-11,2.118e-11,4.165e-11,4.591e-11,5.052e-11,7.317e-11,8.405e-11,8.783e-11,9.936e-11,1.124e-10,1.2e-10,1.626e-10,1.68…	3L_11011935_SNP,2L_14481565_SNP,3L_18119458_SNP,3R_3984280_SNP	1.2e-07,2.296e-06,5.577e-06,6.416e-06
FBgn0033060	2R	1964415	1965593	+	2R_1066130_SNP(trans-intra-arm),2L_15307954_SNP(trans-inter-arm),2R_1954035_SNP(trans-intra-arm),2L_19805842_SNP(trans-inter-arm)			2R_1066130_SNP,2R_1028721_SNP,2R_1027135_SNP,2R_1019973_SNP,2R_2988367_SNP,2R_1417211_SNP,2R_1727686_INS,2R_2678133_SNP,2R_1066681_SNP,2R_1018450_SNP,2R_1069009_SNP,2R_1066809_SNP,2R_949273_SNP,2R_1627187_SNP,2R_11338592_SNP,2R_1018631_SNP,2R_3058438_SNP,2R_2993600_SNP,2R_2993646_SNP,2R_2993663_SNP,2R_1111637_SNP,2R_1065179_SNP,2R_949224_DEL,2R_11342850_SNP,2R_949286_MNP,2R_11342507_SNP,2R_949241…	2.256e-10,8.962e-10,1.891e-09,2.088e-09,6.923e-09,8.128e-09,1.502e-08,1.648e-08,2.099e-08,3.553e-08,3.944e-08,4.076e-08,4.873e-08,5.05e-08,5.062e-08,5.653e-08,8.01e-08,8.016e-08,8.323e-08,8.323e-08,1.008e-07,1.051e-07,1.055e-07,1.091e-07,1.101e-07,1.106e-07,1.326e-07,1.381e-07,1.423e-07,1.433e-07,1.488e-07,1.655e-07,1.678e-07,1.985e-07,1.997e-07,2.078e-07,2.104e-07,2.105e-07,2.276e-07,2.929e-07,2…	2L_19805842_SNP,2L_20082021_SNP,2L_20087287_SNP,2L_20076927_SNP,2L_17014361_SNP,2L_19679321_SNP,2L_20077209_SNP,2L_20074853_SNP,2L_20069673_SNP,2L_19814645_SNP,2L_19814738_SNP,2L_19814650_SNP,2L_20054816_SNP,2L_15382367_SNP,2L_15382399_SNP,2L_15382401_SNP,2L_20099842_SNP,2L_20125351_SNP,2L_17005863_SNP,2L_17014364_SNP,2L_17014365_SNP,2L_18367106_SNP,2L_20169724_SNP,2L_16998374_SNP,2L_20322077_SNP…	7.326e-10,9.271e-10,1.047e-09,1.662e-09,2.4e-09,4.762e-09,5.862e-09,1.088e-08,1.101e-08,1.933e-08,2.156e-08,2.238e-08,2.719e-08,3.48e-08,3.693e-08,4.075e-08,6.513e-08,7.714e-08,1.259e-07,1.269e-07,1.269e-07,1.498e-07,1.522e-07,1.684e-07,1.696e-07,1.88e-07,1.928e-07,2.76e-07,3.173e-07,3.201e-07,3.973e-07,4.016e-07,4.057e-07,4.128e-07,4.883e-07,5.029e-07,5.178e-07,5.464e-07,5.598e-07,7.057e-07,7.20…
FBgn0033061	2R	1966146	1968077	-	2R_1956765_SNP(trans-intra-arm),2R_1782254_INS(trans-intra-arm),3R_7141441_SNP(trans-inter-arm),2L_15759465_SNP(trans-inter-arm)	2R_1966100_SNP,2R_1966132_SNP,2R_1967078_SNP	4.007e-11,4.497e-08,1.245e-07	2R_1956765_SNP,2R_1958042_SNP,2R_1963783_SNP,2R_1959823_SNP,2R_1962463_SNP,2R_1954558_SNP,2R_1961856_SNP,2R_1956682_SNP,2R_1962194_SNP,2R_1957547_SNP,2R_1945828_SNP,2R_1962909_SNP,2R_1945762_SNP,2R_1945755_SNP,2R_1945863_SNP,2R_1973683_SNP,2R_1951256_SNP,2R_1953915_SNP,2R_1961236_SNP,2R_1945781_SNP,2R_1963863_SNP,2R_1963300_SNP,2R_1945945_SNP,2R_1891076_SNP,2R_1961063_SNP,2R_1737008_SNP,2R_196388…	2.445e-23,1.837e-20,4.885e-12,6.401e-12,1.806e-11,3.219e-11,4.964e-11,5.505e-11,9.389e-11,3.309e-10,4.173e-10,4.222e-10,4.54e-10,4.919e-10,5.14e-10,9.858e-10,2.001e-09,2.12e-09,2.413e-09,3.009e-09,3.125e-09,9.108e-09,9.262e-09,9.824e-09,1.132e-08,1.314e-08,1.876e-08,2.086e-08,2.092e-08,2.126e-08,3.236e-08,3.405e-08,4.129e-08,4.53e-08,5.65e-08,6.057e-08,6.336e-08,6.462e-08,7.037e-08,7.474e-08,8.95…	2L_22067278_SNP,2L_13874833_SNP,2L_22732477_SNP,2L_17911857_SNP,2L_21003847_SNP,2L_17988779_SNP,2L_15759465_SNP,2L_21003840_SNP,2L_16356631_SNP,2L_20838860_SNP,2L_17937494_SNP,2L_17906304_DEL,2L_17906314_SNP,2L_17931656_SNP,2L_17876163_SNP,2L_14131424_DEL,2L_19378047_SNP,2L_18367818_SNP,3R_7141441_SNP,2L_17911101_SNP,2L_18367106_SNP,2L_17924068_SNP,2L_17914815_SNP,2L_17911721_SNP,2L_17999677_SNP,…	7.048e-09,7.06e-09,3.145e-08,1.107e-07,1.56e-07,3.098e-07,3.236e-07,4.01e-07,4.077e-07,4.131e-07,4.801e-07,5.385e-07,5.722e-07,5.9e-07,6.248e-07,6.323e-07,6.983e-07,7.077e-07,7.223e-07,7.466e-07,8.177e-07,8.217e-07,9.236e-07,9.477e-07,9.739e-07,1.101e-06,1.127e-06,1.156e-06,1.206e-06,1.343e-06,1.413e-06,1.796e-06,1.926e-06,1.98e-06
FBgn0033087	2R	2557659	2560877	-	2R_2557783_SNP(cis),2R_14754443_INS(trans-intra-arm)	2R_2557783_SNP	4.964e-11	2R_14754443_INS	3.657e-08
FBgn0033092	2R	2563327	2580667	+	2R_2563385_SNP(cis),3L_7269852_SNP(trans-inter-arm)	2R_2563385_SNP,2R_2564220_SNP,2R_2564084_SNP,2R_2563662_SNP,2R_2563068_SNP,2R_2563354_SNP,2R_2562782_SNP,2R_2563861_SNP,2R_2563916_SNP	1.363e-13,6.549e-12,7.723e-10,1.979e-09,2.847e-09,2.956e-09,4.671e-09,4.09e-08,4.684e-08	2R_2559822_SNP,2R_2567283_SNP	4.582e-08,1.107e-07	3L_7269852_SNP	2.545e-07
FBgn0033096	2R	2603847	2605212	-	2L_6726346_SNP(trans-inter-arm),2L_16585583_SNP(trans-inter-arm),2L_4076824_SNP(trans-inter-arm)					2L_6726346_SNP,2L_16585583_SNP,2L_4076824_SNP,2L_16585581_SNP	8.086e-14,8.429e-13,2.987e-12,4.272e-12
FBgn0033100	2R	2643801	2644714	-	2R_2646199_SNP(trans-intra-arm),3L_513018_SNP(trans-inter-arm)	2R_2643770_SNP,2R_2643823_INS,2R_2645440_SNP	3.993e-11,1.935e-08,2.13e-07	2R_2646199_SNP,2R_2645782_SNP,2R_2646006_SNP,2R_2645953_SNP,2R_2638852_SNP,2R_2642534_DEL,2R_2626268_SNP,2R_2628074_SNP,2R_2628932_SNP,2R_2631968_SNP,2R_2648451_SNP,2R_2636639_SNP,2R_2656913_SNP,2R_2633726_SNP,2R_2625343_SNP,2R_2638996_DEL,2R_2633843_SNP,2R_2620824_SNP,2R_2642266_SNP,2R_2641396_SNP,2R_2641404_SNP,2R_2641395_SNP,2R_2641706_SNP	6.016e-17,7.141e-16,4.642e-15,5.675e-15,2.502e-13,2.502e-13,4.932e-12,2.405e-11,2.405e-11,2.405e-11,6.113e-11,6.955e-11,2.929e-10,1.201e-09,9.289e-09,2.138e-08,1.227e-07,1.28e-07,1.281e-07,1.988e-07,1.988e-07,2.262e-07,2.382e-07	3L_518157_SNP,3L_513018_SNP,3L_513979_SNP,3L_518514_SNP,3L_518935_SNP,3L_510732_SNP,2L_15980352_SNP,3L_514397_DEL	3.228e-09,2.844e-08,3.122e-08,3.291e-08,4.007e-08,6.892e-08,9.837e-08,1.564e-07
FBgn0033101	2R	2645106	2646408	-	2R_2642534_DEL(trans-intra-arm),3R_9869240_SNP(trans-inter-arm)	2R_2646199_SNP,2R_2646006_SNP,2R_2645782_SNP,2R_2645953_SNP	7.236e-14,1.634e-11,1.639e-11,1.976e-11	2R_2638852_SNP,2R_2642534_DEL,2R_2636639_SNP,2R_2628074_SNP,2R_2628932_SNP,2R_2631968_SNP,2R_2633726_SNP,2R_2626268_SNP,2R_2620824_SNP,2R_2625343_SNP,2R_2633843_SNP,2R_2648451_SNP,2R_2624989_SNP,2R_2638996_DEL,2R_2605795_SNP,2R_2656913_SNP,2R_2596836_SNP,2R_2598134_SNP,2R_2598215_SNP,2R_2596764_SNP,2R_2596771_SNP	1.558e-19,1.558e-19,3.945e-19,6.873e-18,6.873e-18,6.873e-18,5.158e-16,5.839e-15,2.03e-14,8.158e-13,2.026e-12,4.371e-12,7.983e-12,2.912e-11,1.83e-10,2.027e-10,2.162e-10,6.982e-10,7.81e-10,1.847e-09,1.847e-09	3R_9869240_SNP,3R_13648340_SNP	2.074e-11,7.209e-10
FBgn0033112	2R	2766790	2768275	-	X_15121650_SNP(trans-inter-arm)					X_15121650_SNP	6.383e-09
FBgn0033115	2R	2773057	2775767	+	2R_2781538_SNP(trans-intra-arm)	2R_2773062_SNP	1.555e-09	2R_2781538_SNP,2R_2763767_SNP	2.825e-11,3.941e-09
FBgn0033127	2R	2912515	2915587	+	2R_5542789_SNP(trans-intra-arm)			2R_5542789_SNP	3.497e-11
FBgn0033128	2R	2916416	2920738	+	3L_19421856_SNP(trans-inter-arm),2R_3006289_SNP(trans-intra-arm)	2R_2916400_DEL,2R_2915782_SNP	1.39e-09,6.129e-08	2R_3006289_SNP,2R_2926500_SNP,2R_2952509_SNP,2R_2941493_SNP,2R_2902329_SNP,2R_2910109_SNP,2R_2984105_SNP,2R_2925543_SNP,2R_2937804_SNP,2R_2903897_SNP,2R_2932266_SNP,2R_2909423_SNP,2R_2925015_SNP,2R_2912040_SNP,2R_2930408_SNP,2R_2922133_SNP,2R_2929791_DEL,2R_2951311_SNP,2R_2947492_SNP,2R_2904048_SNP,2R_2902395_SNP,2R_2922555_SNP	2.059e-09,3.197e-09,6.163e-09,7.103e-09,1.004e-08,1.261e-08,1.933e-08,2.485e-08,3.523e-08,4.385e-08,5.268e-08,5.276e-08,5.85e-08,9.96e-08,9.983e-08,1.164e-07,1.252e-07,1.523e-07,1.682e-07,1.699e-07,1.731e-07,1.919e-07	3L_19421856_SNP,3L_19422185_SNP,X_18885876_SNP	1.167e-09,3.71e-08,6.67e-08
FBgn0033130	2R	2922630	2924454	+	2R_2915782_SNP(trans-intra-arm)	2R_2922216_SNP,2R_2922555_SNP,2R_2922133_SNP,2R_2925015_SNP,2R_2925242_SNP,2R_2922166_SNP,2R_2923207_SNP,2R_2924307_DEL	1.179e-10,2.837e-10,3.663e-09,6.659e-09,5.915e-08,1.243e-07,3.846e-07,4.871e-07	2R_2915782_SNP,2R_2919068_SNP,2R_2909423_SNP,2R_2908055_SNP,2R_2904048_SNP,2R_2903897_SNP,2R_2910109_SNP,2R_2910051_SNP,2R_2902395_SNP,2R_2917699_SNP,2R_2910359_SNP,2R_2929791_DEL,2R_2925543_SNP,2R_2927658_SNP,2R_2916400_DEL,2R_2917088_SNP,2R_2912040_SNP,2R_2926500_SNP,2R_2908657_SNP,2R_2927912_SNP,2R_2929131_SNP,2R_2932266_SNP,2R_14278325_SNP,2R_2927964_SNP,2R_2912365_SNP,2R_2929711_SNP	4.554e-11,5.576e-11,1.012e-10,3.698e-10,3.921e-10,5.95e-10,1.175e-09,1.661e-09,2.135e-09,2.654e-09,7.435e-09,7.869e-09,1.162e-08,2.318e-08,3.933e-08,9.783e-08,1.028e-07,1.176e-07,2.622e-07,2.834e-07,3.1e-07,5.248e-07,5.824e-07,6.443e-07,6.878e-07,7.491e-07
FBgn0033132	2R	2927641	2930267	+	2R_2689623_SNP(trans-intra-arm),3L_9844741_INS(trans-inter-arm)			2R_2526374_SNP,2R_2858590_SNP,2R_2796206_SNP,2R_2802866_SNP,2R_2825438_SNP,2R_2827850_SNP,2R_2867262_SNP,2R_2855862_SNP,2R_2860567_SNP,2R_2801744_SNP,2R_2862923_SNP,2R_2765955_SNP,2R_2695067_SNP,2R_2835843_SNP,2R_2551250_SNP,2R_2658778_SNP,2R_3291823_SNP,2R_2539161_SNP,2R_2599345_SNP,2R_2802547_SNP,2R_2630299_SNP,2R_2741641_SNP,2R_2748653_SNP,2R_2900379_SNP,2R_2715991_SNP,2R_2721587_SNP,2R_274312…	5.438e-11,1.706e-10,4.181e-10,7.352e-10,8.865e-10,1.273e-09,2.636e-09,2.677e-09,2.677e-09,2.765e-09,2.991e-09,3.477e-09,4.239e-09,4.738e-09,5.248e-09,1.022e-08,1.139e-08,1.181e-08,1.193e-08,1.278e-08,2.104e-08,2.221e-08,2.221e-08,2.319e-08,2.398e-08,2.508e-08,2.51e-08,2.583e-08,2.679e-08,2.7e-08,2.718e-08,2.831e-08,2.831e-08,2.94e-08,3.018e-08,3.1e-08,3.16e-08,3.339e-08,3.354e-08,3.712e-08,4.001e…	3L_7212772_SNP,3L_9844741_INS	2.666e-07,2.729e-07
FBgn0033133	2R	2930161	2932215	+	2R_2943799_SNP(trans-intra-arm)			2R_2943799_SNP	8.897e-09
FBgn0033178	2R	3351009	3352492	+	2R_9269219_SNP(trans-intra-arm)			2R_9269219_SNP	2.461e-09
FBgn0033184	2R	3396032	3397862	-	2R_3397638_SNP(cis)	2R_3397638_SNP,2R_3397566_SNP	4.7e-11,1.744e-09
FBgn0033187	2R	3406785	3410046	+	X_5053994_SNP(trans-inter-arm)					X_5053994_SNP,X_5053794_SNP	6.979e-10,3.967e-08
FBgn0033188	2R	3413623	3420486	-	2R_18275857_SNP(trans-intra-arm)			2R_18275857_SNP	5.414e-10
FBgn0033194	2R	3454314	3468180	+	3R_19952519_SNP(trans-inter-arm)					3R_19952519_SNP,3R_19952180_SNP	1.006e-09,1.065e-09
FBgn0033195	2R	3475278	3477614	-	2R_3477464_SNP(cis)	2R_3477464_SNP,2R_3475481_SNP,2R_3475197_SNP,2R_3475333_SNP,2R_3474437_SNP	4.854e-09,2.821e-08,3.224e-08,3.507e-08,1.408e-07	2R_3450276_SNP,2R_3451754_SNP,2R_3471012_SNP,2R_3471001_SNP,2R_3468790_SNP	5.555e-09,5.826e-09,2.729e-08,2.738e-08,1.279e-07
FBgn0033199	2R	3539130	3542807	-	2R_3535286_SNP(trans-intra-arm),3R_11807174_SNP(trans-inter-arm)	2R_3543014_SNP,2R_3542056_SNP,2R_3538352_SNP,2R_3539538_SNP,2R_3539564_SNP	5.511e-10,1.932e-09,5.083e-09,2.559e-07,5.961e-07	2R_3535286_SNP,2R_3541561_SNP,2R_3535169_SNP,2R_3530268_SNP,2R_3520556_SNP,2R_3522861_SNP,2R_3535621_SNP,2R_3540794_SNP,2R_3523396_INS,2R_3519630_SNP,2R_3522687_SNP,2R_3523961_SNP,2R_3537753_SNP,2R_3541581_SNP,2R_3529461_SNP,2R_3519573_SNP,2R_3530242_SNP,2R_3534461_SNP,2R_3526806_SNP,2R_3524346_SNP,2R_3467479_SNP,2R_3534672_SNP,2R_3524348_SNP,2R_3544771_SNP,2R_3529881_SNP,2R_3534677_SNP,2R_358054…	4.422e-12,5.969e-12,4.197e-10,5.595e-10,9.371e-10,1.853e-09,2.048e-09,2.091e-09,4.683e-09,7.096e-09,8.512e-09,1.059e-08,1.136e-08,1.531e-08,1.733e-08,2.562e-08,2.8e-08,2.87e-08,3.808e-08,3.817e-08,6.143e-08,6.331e-08,7.931e-08,8.301e-08,1.015e-07,1.441e-07,1.464e-07,1.495e-07,1.638e-07,1.895e-07,1.902e-07,2.184e-07,2.387e-07,2.849e-07,3.455e-07,4.447e-07,4.938e-07,5.938e-07,7.004e-07,7.41e-07,8.2…	3R_11815768_SNP,2L_8804033_SNP,3R_11807174_SNP,2L_7885054_SNP,3R_11806352_SNP,3R_11807057_SNP,3R_11807058_SNP,3R_11800816_SNP,3R_11808735_SNP	2.627e-07,5.281e-07,5.611e-07,6.017e-07,6.169e-07,6.282e-07,6.282e-07,8.042e-07,1.103e-06
FBgn0033205	2R	3553333	3554848	+	2R_3553527_SNP(cis),2R_3537461_SNP(trans-intra-arm)	2R_3553584_SNP,2R_3553527_SNP,2R_3553938_SNP,2R_3554742_DEL,2R_3553819_SNP,2R_3552986_SNP	6.296e-28,1.517e-27,2.752e-16,4.23e-15,3.001e-13,8.223e-12	2R_3552070_SNP,2R_3552021_SNP,2R_3551845_SNP,2R_3551495_SNP,2R_3534500_SNP,2R_3520938_SNP,2R_3541673_DEL,2R_3532013_SNP,2R_3532617_SNP,2R_3534593_SNP,2R_3537461_SNP,2R_3540794_SNP,2R_3551498_SNP,2R_3547390_SNP,2R_3516993_SNP,2R_3533523_SNP,2R_3535169_SNP,2R_3535286_SNP,2R_3541683_DEL,2R_3543014_SNP,2R_3544771_SNP,2R_3556879_SNP,2R_3551452_SNP,2R_3537845_SNP,2R_3537594_SNP,2R_3541681_SNP,2R_475775…	1.416e-15,2.451e-15,4.623e-15,2.524e-13,8.289e-12,8.203e-10,1.58e-09,2.123e-09,3.964e-09,4.934e-09,1.576e-08,1.947e-08,1.989e-08,2.237e-08,2.416e-08,3.083e-08,4.465e-08,4.597e-08,4.732e-08,5.179e-08,5.469e-08,5.69e-08,6.449e-08,7.114e-08,1.052e-07,1.242e-07,1.42e-07,1.51e-07,1.736e-07,1.941e-07,2.448e-07,2.514e-07,2.912e-07,2.955e-07,3.203e-07,3.242e-07,4.013e-07
FBgn0033233	2R	3810280	3812493	-	2R_3814423_SNP(trans-intra-arm)			2R_3814423_SNP	1.728e-08
FBgn0033240	2R	3843655	3845759	+	2R_3844082_SNP(cis)	2R_3844082_SNP,2R_3843761_SNP,2R_3843863_SNP,2R_3844777_SNP,2R_3842764_SNP,2R_3845218_SNP,2R_3845586_SNP,2R_3843660_SNP,2R_3843404_SNP,2R_3843888_SNP,2R_3843165_SNP,2R_3843852_SNP	6.417e-11,8.468e-11,4.692e-10,4.746e-10,1.508e-09,1.846e-09,2.909e-09,4.837e-09,1.231e-08,5.6e-08,5.809e-08,8.476e-08	2R_3864890_SNP,2R_3864894_SNP,2R_3879668_SNP,2R_3858691_SNP,2R_3858548_SNP,2R_3863700_SNP,2R_3849664_SNP,2R_3854494_SNP,2R_3873585_SNP,2R_3863789_SNP,2R_3856156_SNP	1.801e-10,2.473e-09,3.216e-09,1.045e-08,2.674e-08,2.942e-08,4.943e-08,1.096e-07,1.2e-07,1.332e-07,1.831e-07
FBgn0033241	2R	3845712	3847520	-	2R_3843643_DEL(trans-intra-arm)	2R_3846667_SNP	1.555e-15	2R_3843643_DEL,2R_3843640_SNP,2R_3843574_SNP,2R_3853216_SNP,2R_3840710_SNP,2R_3843162_DEL,2R_3840708_INS,2R_3876211_DEL,2R_3835203_SNP,2R_3840195_SNP,2R_3857024_SNP,2R_3841066_SNP,2R_3844094_SNP,2R_20121275_DEL	2.195e-29,3.705e-28,5.675e-28,3.382e-27,9.396e-23,5.091e-22,2.878e-21,1.473e-19,8.494e-17,2.183e-15,1.799e-14,7.586e-13,4.072e-10,8.008e-10
FBgn0033271	2R	4046911	4049070	-	2R_4048474_DEL(cis)	2R_4048474_DEL	5.01e-09
FBgn0033297	2R	4359459	4361466	+	2R_4361442_DEL(cis)	2R_4361442_DEL	2.244e-10
FBgn0033302	2R	4451692	4454707	-	2R_4452360_SNP(cis),2R_4454918_SNP(cis)	2R_4452347_SNP,2R_4452360_SNP,2R_4451495_SNP,2R_4454918_SNP,2R_4451984_SNP,2R_4455035_SNP,2R_4452225_SNP	9.146e-21,1.028e-20,4.04e-17,8.872e-16,1.809e-12,7.752e-10,2.469e-07	2R_4445989_SNP,2R_4452887_SNP,2R_4452893_SNP,2R_4449971_SNP,2R_4452878_SNP,2R_4445762_SNP,2R_4460531_SNP,2R_4460569_SNP,2R_4455901_SNP,2R_4447767_SNP,2R_4457945_SNP,2R_4483917_SNP,2R_4457983_SNP,2R_4457913_SNP,2R_4448497_SNP,2R_4457994_SNP,2R_4456742_SNP,2R_4440168_SNP,2R_4456744_SNP,2R_4460951_SNP,2R_4460272_SNP,2R_4460996_SNP,2R_4452728_SNP,2R_4461002_SNP,2R_4463521_SNP,2R_4460338_SNP,2R_445274…	9.322e-18,1.158e-15,3.505e-15,4.715e-15,9.331e-15,1.557e-14,6.278e-13,1.575e-12,7.412e-11,6.725e-10,1.829e-09,1.838e-09,9.851e-09,1.615e-08,2.307e-08,3.185e-08,3.867e-08,4.003e-08,5.986e-08,8.155e-08,9.381e-08,9.897e-08,1.057e-07,1.066e-07,1.275e-07,1.342e-07,1.449e-07,1.466e-07,1.65e-07,2.431e-07,2.468e-07,3.051e-07,3.177e-07,3.263e-07,5.161e-07,5.479e-07,5.874e-07,5.875e-07,6.091e-07,7.99e-07,1…	2L_13142359_SNP,3R_14028661_SNP	2.464e-07,1.054e-06
FBgn0033327	2R	4600951	4602599	+	2R_4600625_SNP(cis)	2R_4600625_SNP	1.156e-19	2R_4594210_SNP,2R_4594426_SNP,2R_4629920_SNP,2R_4629918_SNP,2R_4702070_SNP,2R_4574436_SNP,2R_4614758_SNP,2R_4616944_SNP,2R_4715710_SNP,2R_4592633_SNP,2R_4625801_SNP,2R_4568348_SNP,2R_4627091_SNP	6.791e-14,3.66e-13,1.295e-12,2.069e-12,2.323e-12,3.742e-12,5.354e-12,6.29e-12,6.571e-12,2.225e-11,2.291e-11,4.907e-11,1.662e-10
FBgn0033347	2R	4806445	4807873	-	2R_4806773_SNP(cis)	2R_4806773_SNP	3.773e-10	2R_4937846_SNP	1.939e-09
FBgn0033351	2R	4814519	4815610	-	2L_16538409_SNP(trans-inter-arm)					2L_16538409_SNP	1.535e-09
FBgn0033353	2R	4820928	4821950	+	2R_4820989_SNP(cis),2R_14293440_SNP(trans-intra-arm)	2R_4820989_SNP,2R_4820906_SNP,2R_4820930_SNP	2.561e-12,5.379e-12,1.431e-11	2R_14293440_SNP	2.021e-10
FBgn0033354	2R	4822081	4827294	-	2R_4827100_SNP(cis)	2R_4826901_SNP,2R_4827100_SNP,2R_4826923_SNP	8.675e-10,3.161e-09,1.378e-08	2R_4824607_SNP	9.012e-10
FBgn0033357	2R	4839100	4839747	+	2R_4839637_SNP(cis),2R_4824056_SNP(trans-intra-arm)	2R_4839637_SNP,2R_4838993_SNP,2R_4839720_SNP,2R_4838977_SNP,2R_4839406_SNP	1.184e-15,6.566e-10,8.751e-10,7e-09,1.074e-07	2R_4837993_SNP,2R_4824056_SNP,2R_4841192_SNP,2R_4837781_SNP,2R_4837720_SNP,2R_4828797_SNP	3.724e-10,6.777e-09,8.919e-09,3.219e-08,3.881e-08,1.667e-07
FBgn0033366	2R	4927233	4929647	-	2R_4929383_SNP(cis)	2R_4929383_SNP,2R_4929379_SNP,2R_4929365_SNP,2R_4929376_SNP,2R_4927261_SNP,2R_4926956_SNP,2R_4929491_DEL,2R_4926372_SNP	4.177e-09,4.538e-09,7.591e-09,9.239e-09,1.741e-08,2.157e-08,2.759e-08,5.941e-08	2R_4935028_SNP,2R_4925832_DEL	6.344e-08,1.251e-07
FBgn0033373	2R	4977279	4980398	-	2L_22020382_SNP(trans-inter-arm)					2L_22020382_SNP	2.626e-08
FBgn0033379	2R	4999010	5001456	-	2R_5001431_SNP(cis)	2R_5001260_SNP,2R_5001431_SNP,2R_5001176_SNP,2R_5001587_SNP,2R_5001620_SNP,2R_5001531_SNP	5.307e-09,9.693e-09,1.4e-08,1.575e-08,1.746e-08,4.224e-08	2R_5005553_SNP,2R_5002838_SNP,2R_5005454_SNP,2R_4867039_SNP,2R_4980867_SNP	9.804e-09,1.163e-08,2.313e-08,1.473e-07,3.013e-07
FBgn0033395	2R	5125017	5127336	+	2R_5127921_SNP(cis)	2R_5127921_SNP,2R_5124870_SNP,2R_5124916_SNP,2R_5124842_SNP,2R_5125590_SNP,2R_5124357_SNP	1.744e-13,2.196e-10,5.515e-10,4.745e-09,1.172e-08,1.25e-07	2R_5129245_SNP,2R_5128975_SNP,2R_5131003_SNP,2R_5128996_SNP,2R_5129382_SNP	1.734e-12,1.001e-08,1.308e-08,1.469e-08,1.776e-07
FBgn0033397	2R	5129825	5131915	+	2R_5130532_SNP(cis),2R_5127800_SNP(trans-intra-arm)	2R_5130532_SNP,2R_5130321_SNP,2R_5130505_SNP,2R_5128975_SNP,2R_5129245_SNP,2R_5131890_DEL,2R_5130546_SNP	1.181e-16,2.975e-12,3.025e-09,2.007e-08,3.972e-08,1.738e-07,2.237e-07	2R_5127800_SNP,2R_5127200_SNP,2R_5127801_SNP,2R_5137357_SNP,2R_5137958_SNP,2R_5136772_SNP,2R_5138386_SNP,2R_5137937_SNP,2R_5137970_SNP,2R_5137996_SNP,2R_5138001_SNP,2R_5137976_SNP,2R_5137995_SNP,2R_5137211_SNP,2R_5138003_SNP,2R_5137366_SNP,2R_5139650_SNP,2R_5123267_SNP,2R_5121118_SNP,2R_5138052_SNP,2R_5138051_SNP	8.608e-10,4.338e-09,4.365e-09,1.076e-08,1.707e-08,2.107e-08,3.46e-08,3.829e-08,3.829e-08,3.829e-08,3.829e-08,4.309e-08,6.04e-08,1.025e-07,1.13e-07,1.224e-07,1.832e-07,1.92e-07,3.445e-07,4.093e-07,4.399e-07	2L_13910885_SNP	2.733e-07
FBgn0033408	2R	5282835	5283711	-	2R_5283809_SNP(cis)	2R_5283809_SNP,2R_5283833_SNP,2R_5283822_SNP,2R_5283768_SNP,2R_5283867_SNP,2R_5283893_SNP,2R_5283990_SNP,2R_5284647_SNP,2R_5282793_SNP,2R_5282796_SNP,2R_5283327_SNP,2R_5282798_INS,2R_5282756_SNP	8.72e-12,1.246e-11,4.851e-11,5.532e-11,5.862e-11,6.663e-11,3.76e-10,6.429e-10,3.861e-09,5.817e-09,1.097e-08,1.472e-08,2.87e-08
FBgn0033428	2R	5472148	5473631	+	2R_5471724_SNP(cis)	2R_5471724_SNP,2R_5474530_INS,2R_5473740_DEL,2R_5473745_INS,2R_5472336_SNP,2R_5474521_SNP,2R_5474484_SNP,2R_5471870_SNP,2R_5474511_SNP,2R_5474552_SNP,2R_5473565_SNP,2R_5474477_SNP,2R_5471446_SNP,2R_5474512_SNP	6.193e-09,1.631e-08,2.201e-08,2.201e-08,3.124e-08,8.076e-08,9.341e-08,9.839e-08,9.839e-08,9.839e-08,2.909e-07,3.554e-07,6.17e-07,1.099e-06	2R_5477547_SNP,2R_5470629_SNP,2R_5475950_SNP,2R_5500173_DEL,2R_5477634_SNP,2R_5501674_SNP,2R_5476453_INS,2R_5476457_DEL,2R_5498406_SNP,2R_5480597_SNP,2R_5498673_SNP,2R_5475806_SNP,2R_5477502_SNP,2R_5469944_SNP,2R_5477863_SNP,2R_5477802_SNP,2R_5485593_SNP,2R_5498282_SNP,2R_5500312_SNP,2R_5476330_SNP,2R_5498557_SNP,2R_5501675_SNP,2R_5484971_SNP,2R_5498637_SNP,2R_5492798_DEL,2R_5476447_DEL,2R_549855…	8.827e-09,1.096e-08,1.943e-08,2.004e-08,2.438e-08,2.673e-08,2.976e-08,2.976e-08,3.833e-08,4.736e-08,5.055e-08,6.317e-08,6.773e-08,8.865e-08,8.865e-08,9.839e-08,9.839e-08,9.839e-08,9.839e-08,1.021e-07,1.046e-07,1.05e-07,1.155e-07,1.178e-07,1.542e-07,1.593e-07,1.668e-07,1.72e-07,1.79e-07,2.16e-07,2.427e-07,3.273e-07,3.539e-07,3.873e-07,4.13e-07,4.2e-07,4.211e-07,4.4e-07,4.722e-07,5.151e-07,6.261e-0…
FBgn0033429	2R	5473615	5474219	-	2R_5474036_SNP(cis),2R_5481966_SNP(trans-intra-arm),3L_18742113_SNP(trans-inter-arm)	2R_5474036_SNP,2R_5474551_SNP,2R_5474524_SNP,2R_5474288_SNP,2R_5475086_SNP,2R_5474322_SNP,2R_5474452_SNP,2R_5474440_SNP,2R_5474851_SNP,2R_5474757_SNP,2R_5474488_SNP,2R_5473547_SNP,2R_5475215_SNP,2R_5474375_SNP,2R_5474546_SNP,2R_5474542_INS,2R_5474940_SNP,2R_5474530_INS,2R_5473740_DEL,2R_5473745_INS,2R_5474521_SNP,2R_5473814_SNP,2R_5474511_SNP,2R_5474552_SNP	2.593e-15,3.167e-15,7.236e-15,1.177e-14,1.924e-14,3.777e-14,3.695e-13,2.581e-12,7.762e-12,2.475e-11,3.788e-11,3.561e-10,6.928e-10,2.706e-09,1.627e-07,2.2e-07,4.405e-07,1.45e-06,1.721e-06,1.721e-06,2.291e-06,2.519e-06,2.686e-06,2.686e-06	2R_5477816_SNP,2R_5477616_SNP,2R_5477505_SNP,2R_5475241_DEL,2R_5481966_SNP,2R_5483523_SNP,2R_5471724_SNP,2R_5482731_SNP,2R_5481293_SNP,2R_5478049_INS,2R_5478782_SNP,2R_5481090_SNP,2R_5470943_SNP,2R_5477547_SNP,2R_5475950_SNP,2R_5475806_SNP,2R_5476696_SNP,2R_5478542_SNP,2R_5480796_SNP,2R_5477733_SNP,2R_5475607_SNP,2R_5478076_SNP,2R_5476729_SNP,2R_5471446_SNP,2R_5477529_SNP,2R_5477634_SNP,2R_547750…	5.059e-14,8.215e-13,3.151e-12,1.456e-11,1.933e-11,7.038e-11,8.193e-11,1.122e-10,2.126e-10,2.193e-10,2.326e-10,6.207e-10,7.82e-10,8.071e-10,1.066e-09,1.939e-09,2.278e-09,2.509e-09,2.649e-09,4.358e-09,5.419e-09,6.786e-09,7.046e-09,1.023e-08,1.163e-08,2.313e-08,5.479e-08,5.598e-08,5.915e-08,6.081e-08,7.321e-08,7.485e-08,8.202e-08,8.268e-08,1.159e-07,1.232e-07,1.246e-07,1.486e-07,1.537e-07,2.245e-07,…	3L_18742113_SNP,3R_13559365_SNP	8.089e-07,2.003e-06
FBgn0033434	2R	5481550	5493129	+	2R_5492674_SNP(cis)	2R_5492674_SNP,2R_5492831_SNP,2R_5492815_SNP	1.727e-22,1.357e-10,2.983e-10	2R_5494820_SNP,2R_5499499_SNP,2R_5497537_SNP,2R_5484560_SNP,2R_5499578_SNP,2R_5497519_SNP,2R_5498305_SNP,2R_5465420_SNP,2R_5456987_SNP,2R_5466189_SNP,2R_5449187_SNP,2R_5467074_SNP,2R_5459315_SNP,2R_5466331_SNP,2R_5494651_SNP,2R_5465154_SNP,2R_5494625_SNP,2R_5479653_SNP,2R_5478782_SNP,2R_5497234_SNP,2R_5474851_SNP,2R_5646385_SNP,2R_5479383_SNP,2R_5474322_SNP,2R_5465984_SNP,2R_5640909_SNP	4.148e-14,7.387e-10,3.473e-09,3.753e-09,3.818e-09,4.376e-09,8.142e-09,1.576e-08,2.088e-08,2.393e-08,3.193e-08,3.256e-08,3.321e-08,4.422e-08,4.843e-08,5.395e-08,5.551e-08,1.488e-07,2.426e-07,2.67e-07,3.929e-07,5.117e-07,6.021e-07,6.159e-07,7.308e-07,7.578e-07
FBgn0033450	2R	5725939	5727005	-	2L_17047353_SNP(trans-inter-arm)					2L_17047353_SNP	3.714e-09
FBgn0033458	2R	5758975	5761151	+	2R_5738550_SNP(trans-intra-arm),2R_5786863_SNP(trans-intra-arm)			2R_5738550_SNP,2R_5721850_SNP,2R_5749768_SNP,2R_5735501_SNP,2R_5721479_SNP,2R_5735512_SNP,2R_5735181_SNP,2R_5731874_SNP,2R_5735502_SNP,2R_5736012_SNP,2R_5734458_SNP,2R_5786863_SNP,2R_5735690_SNP,2R_5715838_DEL,2R_5731332_SNP,2R_5735754_SNP,2R_5773054_SNP,2R_5474530_INS,2R_5500173_DEL,2R_5474278_SNP,2R_5473740_DEL,2R_5473745_INS	2.834e-11,4.463e-11,6.535e-11,6.764e-11,8.38e-11,1.013e-10,1.043e-10,1.432e-10,2.173e-10,2.612e-10,2.874e-10,3.173e-10,4.535e-10,9.088e-10,1.142e-09,1.893e-09,3.858e-09,4.952e-09,7.178e-09,7.347e-09,8.025e-09,8.025e-09
FBgn0033459	2R	5762786	5763747	+	2R_5759053_SNP(trans-intra-arm)			2R_5759053_SNP	2.8e-11
FBgn0033465	2R	5798398	5800993	+	2R_5800116_SNP(cis)	2R_5800116_SNP,2R_5800600_SNP	1.41e-09,4.42e-09
FBgn0033467	2R	5846624	5847237	-	2R_5846475_SNP(cis)	2R_5846475_SNP	4.651e-09	2R_5842463_SNP,2R_5845422_SNP,2R_5844222_SNP,2R_5844183_SNP,2R_5843445_SNP	3.685e-10,1.413e-08,2.257e-08,4.41e-08,4.477e-08
FBgn0033475	2R	5920809	5922203	+	2R_5941452_SNP(trans-intra-arm)			2R_5941452_SNP,2R_5941456_DEL,2R_5941498_SNP	1.241e-17,3.218e-17,6.653e-15
FBgn0033479	2R	5950890	5954019	-	2R_5954036_SNP(cis),3L_3773586_SNP(trans-inter-arm)	2R_5954041_SNP,2R_5954777_SNP,2R_5954738_SNP,2R_5954933_SNP,2R_5953171_SNP,2R_5954902_SNP,2R_5954208_SNP,2R_5954036_SNP,2R_5954922_SNP,2R_5953392_SNP,2R_5953028_SNP,2R_5954911_SNP,2R_5953077_SNP,2R_5953821_SNP,2R_5953818_SNP,2R_5953091_SNP,2R_5953157_SNP,2R_5950925_DEL,2R_5954821_SNP,2R_5953195_SNP,2R_5953192_SNP,2R_5954133_SNP,2R_5951606_SNP,2R_5951621_SNP,2R_5954918_SNP	3.977e-24,4.821e-24,8.116e-24,1.012e-23,1.189e-23,1.447e-23,1.622e-23,1.794e-23,2.388e-23,5.274e-23,5.655e-23,9.328e-23,1.882e-22,9.363e-22,1.04e-21,1.755e-21,1.421e-12,3.08e-12,1.042e-09,3.451e-09,8.01e-09,1.716e-08,3.121e-08,4.844e-08,6.915e-08	2R_5956758_SNP,2R_5952995_SNP,2R_5956601_SNP,2R_5956984_SNP,2R_5955786_SNP,2R_5955974_SNP,2R_5955313_SNP,2R_5955428_SNP,2R_5955423_SNP,2R_5955430_SNP,2R_5955435_SNP,2R_5957112_SNP,2R_5955402_SNP,2R_5955315_SNP,2R_5955307_SNP,2R_5947344_SNP,2R_5955337_SNP,2R_5955399_SNP,2R_5956236_SNP,2R_5959632_SNP,2R_5949364_SNP,2R_5949535_SNP,2R_5961752_SNP,2R_5963920_SNP,2R_5949745_SNP,2R_5963988_SNP,2R_594539…	2.043e-20,2.694e-14,1.722e-13,7.333e-13,9.369e-12,1.255e-11,4.437e-11,5.693e-11,7.801e-11,8.214e-11,8.878e-11,1.036e-10,1.141e-10,1.163e-10,1.401e-10,1.832e-10,1.993e-10,2.408e-10,3.811e-10,6.489e-10,6.792e-10,1.078e-09,1.128e-09,3.978e-09,5.326e-09,1.147e-08,1.727e-08,1.836e-08,2.609e-08,3.222e-08,3.293e-08,3.738e-08,1.508e-07,1.603e-07,1.631e-07,2.269e-07,3.052e-07,4.85e-07,4.99e-07,5.37e-07,8.…	3L_3773586_SNP,3L_18260847_SNP	5.238e-07,1.305e-06
FBgn0033518	2R	6306223	6307266	+	2R_6313636_SNP(trans-intra-arm),2L_12267738_SNP(trans-inter-arm),2L_14412690_SNP(trans-inter-arm)	2R_6305882_SNP,2R_6305987_DEL,2R_6306041_SNP	1.347e-07,2.344e-07,6.817e-07	2R_6313636_SNP,2R_6313073_SNP,2R_6313059_MNP,2R_6313055_DEL,2R_6313046_MNP,2R_6313067_MNP,2R_6313052_SNP,2R_6313071_SNP,2R_6316731_SNP,2R_6313065_SNP,2R_6313078_DEL,2R_6313004_SNP,2R_6313076_SNP,2R_6319095_SNP,2R_6313108_SNP,2R_6313016_DEL,2R_6316466_SNP,2R_6311610_SNP,2R_6316467_SNP,2R_6316574_SNP,2R_6314133_SNP,2R_6313364_SNP,2R_6304904_SNP,2R_6313292_INS,2R_6313216_DEL,2R_6313303_SNP,2R_631304…	7.857e-12,1.686e-11,3.726e-11,4.197e-11,4.544e-11,6.042e-11,7.15e-11,8.079e-11,8.948e-11,1.821e-10,1.885e-10,2.542e-10,4.606e-10,5.28e-10,6.489e-10,7.056e-10,6.495e-09,1.651e-08,1.991e-08,2.417e-08,4.22e-08,6.283e-08,1.232e-07,2.688e-07,4.208e-07,4.481e-07,4.523e-07,5.153e-07,5.278e-07,5.987e-07,6.341e-07,6.64e-07,7.226e-07,7.327e-07,8.367e-07,9.348e-07	2L_14412690_SNP,3L_835288_SNP,X_2797786_SNP,3L_835348_SNP,2L_12267738_SNP	1.335e-07,2.83e-07,3.708e-07,6.641e-07,9.848e-07
FBgn0033519	2R	6307919	6311155	-	2R_6311774_SNP(cis),3R_19548699_DEL(trans-inter-arm)	2R_6311774_SNP	3.822e-21	2R_6327888_INS,2R_6327946_SNP,2R_6327492_INS,2R_6327597_SNP,2R_6326138_SNP,2R_6304194_DEL	1.002e-14,3.946e-14,9.001e-14,3.381e-13,7.178e-13,1.972e-12	3R_19548699_DEL	3.317e-16
FBgn0033523	2R	6324103	6324887	-	2R_6324893_INS(cis),3R_26523166_SNP(trans-inter-arm)	2R_6325341_SNP,2R_6325383_SNP,2R_6325000_DEL,2R_6325076_SNP,2R_6324981_SNP,2R_6324987_SNP,2R_6325173_SNP,2R_6325175_SNP,2R_6325193_SNP,2R_6324985_SNP,2R_6325326_SNP,2R_6325069_SNP,2R_6324984_SNP,2R_6324960_SNP,2R_6325056_SNP,2R_6324893_INS,2R_6324934_SNP,2R_6324976_SNP,2R_6325203_SNP,2R_6325067_SNP,2R_6325079_SNP,2R_6325080_SNP,2R_6324969_SNP,2R_6325362_INS,2R_6324886_SNP,2R_6325044_SNP,2R_632534…	6.099e-11,1.599e-10,2.7e-10,4.288e-10,4.626e-10,5.21e-10,5.984e-10,6.627e-10,7.753e-10,8.686e-10,9.171e-10,1.348e-09,1.473e-09,1.958e-09,2.183e-09,2.278e-09,2.458e-09,2.515e-09,3.02e-09,3.387e-09,5.428e-09,7.279e-09,7.497e-09,8.894e-09,1.282e-08,1.505e-08,1.683e-08,3.152e-08	2R_6326003_SNP,2R_6326672_DEL,2R_6326059_SNP,2R_6325934_SNP,2R_6333183_SNP,2R_6326627_SNP,2R_6326550_SNP,2R_6314202_SNP	1.415e-10,4.319e-10,5.183e-10,6.779e-10,2.262e-09,4.787e-09,7.586e-09,1.097e-08	3R_26523162_DEL,3R_26523174_SNP,3R_26523166_SNP	1.725e-09,8.424e-09,1.027e-08
FBgn0033527	2R	6356121	6357148	+	2R_6356891_SNP(cis)	2R_6356891_SNP	1.336e-08
FBgn0033538	2R	6505167	6529312	+	2R_6525565_SNP(trans-intra-arm)			2R_6525565_SNP	3.214e-14
FBgn0033541	2R	6536393	6537335	+	2R_6537178_SNP(cis)	2R_6537178_SNP	3.836e-18
FBgn0033544	2R	6618840	6625875	+	2R_6624821_SNP(trans-intra-arm)	2R_6624908_SNP,2R_6624907_SNP	1.538e-08,1.82e-08	2R_6624821_SNP	3.185e-09
FBgn0033548	2R	6698061	6698441	-	2R_6698429_SNP(cis)	2R_6698429_SNP,2R_6698423_SNP,2R_6697543_SNP,2R_6697104_SNP,2R_6697560_SNP,2R_6697447_SNP,2R_6697494_SNP,2R_6698233_SNP,2R_6698206_SNP	2.668e-21,4.463e-21,1.627e-13,2.465e-13,2.985e-13,1.652e-12,2.012e-08,6.383e-08,2.472e-07	2R_6697021_SNP,2R_6697031_SNP,2R_6696636_SNP,2R_6704842_SNP,2R_6704778_SNP,2R_6693513_SNP,2R_6703474_SNP	3.313e-14,6.074e-13,3.621e-11,3.908e-08,1.261e-07,1.809e-07,2.586e-07	3L_10386316_SNP,3L_10386760_SNP,3L_10386015_SNP,3L_10386285_SNP,3L_10386287_SNP,3L_10386752_SNP	1.03e-07,1.425e-07,1.633e-07,3.439e-07,3.452e-07,4.619e-07
FBgn0033555	2R	6709181	6709904	+	2R_6708861_SNP(cis)	2R_6708861_SNP,2R_6709392_SNP,2R_6709744_SNP,2R_6709754_SNP	4.237e-12,5.374e-11,1.844e-10,5.879e-08	2R_6711068_SNP,2R_6716782_SNP,2R_6715780_SNP,2R_6714666_SNP,2R_6718800_SNP,2R_6713957_SNP,2R_6711721_SNP,2R_6707079_SNP,2R_6718570_SNP,2R_6700419_SNP,2R_6711086_SNP	5.602e-12,1.037e-10,2.072e-10,3.968e-09,5.042e-09,9.025e-09,9.962e-09,3.782e-08,4.876e-08,5.421e-08,1.17e-07
FBgn0033564	2R	6767479	6770707	+	2R_14754673_SNP(trans-intra-arm),2R_4005099_SNP(trans-intra-arm)			2R_14754673_SNP,2R_4005099_SNP	4.593e-09,7.753e-09
FBgn0033570	2R	6784649	6785390	-	2R_6785120_SNP(cis),2R_6785173_SNP(cis)	2R_6785120_SNP,2R_6784875_SNP,2R_6786077_SNP,2R_6785215_SNP,2R_6785218_SNP,2R_6786179_SNP,2R_6784506_SNP,2R_6786344_SNP,2R_6785173_SNP,2R_6785966_SNP,2R_6784933_INS,2R_6785434_SNP,2R_6786044_SNP,2R_6785870_SNP,2R_6785680_INS,2R_6785867_SNP,2R_6785385_SNP,2R_6785689_SNP,2R_6784235_SNP,2R_6785739_SNP,2R_6784457_SNP,2R_6784170_SNP,2R_6784055_SNP,2R_6786026_SNP	8.027e-20,1.469e-17,2.826e-15,6.486e-15,1.074e-14,6.067e-13,1.061e-12,7.215e-12,8.666e-11,7.741e-10,1.951e-09,2.456e-09,1.005e-08,2.661e-08,6.575e-08,7.282e-08,8.21e-08,2.163e-07,2.334e-07,3.473e-07,3.739e-07,4.044e-07,4.318e-07,1.215e-06	2R_6786561_SNP,2R_6780101_SNP,2R_6786638_SNP,2R_6786623_SNP,2R_6764759_SNP,2R_6786521_SNP,2R_6786410_SNP,2R_6781901_SNP,2R_6782957_SNP,2R_6781909_SNP,2R_6783120_SNP,2R_6760207_SNP,2R_6782964_SNP,2R_6786617_SNP,2R_6786639_SNP,2R_6782873_SNP,2R_6786600_SNP,2R_6779667_SNP,2R_6787973_SNP,2R_6786722_SNP,2R_6794711_SNP,2R_6777267_SNP,2R_6786652_SNP,2R_6787801_SNP,2R_6774017_SNP,2R_6787744_SNP,2R_677734…	7.615e-16,1.028e-13,4.773e-13,1.526e-12,4.558e-10,5.884e-09,6.181e-09,1.213e-08,1.608e-08,1.884e-08,2.984e-08,3.573e-08,4.852e-08,5.503e-08,5.548e-08,6.058e-08,7.033e-08,7.581e-08,8.052e-08,8.188e-08,9.196e-08,1.132e-07,1.304e-07,1.433e-07,1.77e-07,2.306e-07,2.638e-07,3.143e-07,3.256e-07,4.184e-07,5.123e-07,1.183e-06,1.549e-06,1.613e-06	3R_25996519_SNP	1.191e-06
FBgn0033571	2R	6785536	6786565	-	2R_6786026_SNP(cis)	2R_6786026_SNP,2R_6786044_SNP	1.62e-09,2.357e-08
FBgn0033574	2R	6825930	6829243	-	2R_6829329_SNP(cis),2R_6835136_SNP(trans-intra-arm)	2R_6829329_SNP,2R_6828455_SNP,2R_6828407_SNP,2R_6829416_SNP,2R_6829704_SNP,2R_6828809_SNP,2R_6829672_SNP,2R_6828479_SNP,2R_6829752_SNP,2R_6829678_SNP,2R_6826805_DEL,2R_6828944_SNP,2R_6828539_SNP,2R_6828614_SNP	3.465e-30,1.318e-11,2.903e-11,7.106e-11,1.785e-10,5.029e-10,1.102e-09,1.468e-09,4.586e-09,5.812e-09,2.036e-08,2.357e-08,1.026e-07,1.316e-07	2R_6831386_SNP,2R_6835312_SNP,2R_6835136_SNP,2R_6848309_SNP,2R_6849816_DEL,2R_6850212_SNP,2R_6824077_INS,2R_6833081_SNP,2R_6832030_SNP,2R_6848302_SNP,2R_6848275_SNP,2R_6827391_SNP,2R_6833389_SNP,2R_6833474_SNP,2R_6827859_SNP,2R_6844146_SNP,2R_6849911_DEL,2R_6835267_SNP,2R_6835506_SNP,2R_6827439_SNP,2R_6850313_SNP,2R_6844097_SNP,2R_6850024_SNP,2R_6846199_SNP,2R_6833728_SNP,2R_6851399_SNP,2R_682478…	2.237e-12,2.906e-11,5.369e-11,6.378e-11,1.427e-10,1.994e-10,2.355e-10,2.356e-10,2.463e-10,6.358e-10,1.145e-09,1.219e-09,1.22e-09,1.318e-09,2e-09,2.247e-09,2.475e-09,2.57e-09,3.103e-09,4.631e-09,5.237e-09,6.615e-09,6.761e-09,6.843e-09,7.356e-09,7.722e-09,9.641e-09,1.101e-08,1.161e-08,1.171e-08,1.341e-08,1.536e-08,2.17e-08,2.211e-08,3.251e-08,3.758e-08,4.064e-08,4.446e-08,5.569e-08,8.307e-08,9.24e-…
FBgn0033584	2R	7110376	7114251	+	2R_7110193_SNP(cis)	2R_7110193_SNP,2R_7110015_SNP,2R_7110014_SNP,2R_7110071_SNP	9.186e-15,1.536e-11,1.22e-10,1.79e-10
FBgn0033610	2R	7177193	7178601	-	2R_7178536_SNP(cis)	2R_7178536_SNP	7.086e-14
FBgn0033627	2R	7254215	7257792	+	2R_7253376_SNP(cis)	2R_7253376_SNP,2R_7254315_SNP,2R_7254936_SNP,2R_7254864_SNP,2R_7255170_SNP,2R_7253345_INS,2R_7253441_SNP,2R_7253434_SNP,2R_7254751_SNP,2R_7254125_SNP,2R_7254121_SNP,2R_7255102_SNP,2R_7255125_SNP,2R_7255129_SNP,2R_7257096_SNP	1.024e-20,2.3e-20,1.354e-19,2.703e-19,2.346e-18,5.901e-18,8.646e-18,1.625e-17,1.482e-16,7.786e-10,4.388e-09,5.445e-09,1.419e-08,1.802e-08,6.11e-07	2R_7255399_SNP,2R_7255586_DEL,2R_7255633_SNP,2R_7255619_SNP,2R_7255583_SNP,2R_7255762_DEL,2R_7255811_SNP,2R_7255891_SNP,2R_7255944_SNP,2R_7256050_SNP,2R_7255513_SNP,2R_7252964_SNP,2R_7255745_SNP,2R_7246869_SNP,2R_7251584_SNP,2R_7246846_SNP,2R_7251511_SNP,2R_7252779_SNP,2R_7251549_SNP,2R_7251539_SNP,2R_7255424_SNP,2R_7246440_SNP,2R_7246511_SNP,2R_7251509_INS,2R_7249410_SNP,2R_7246420_SNP,2R_725281…	2.413e-19,3.697e-19,4.784e-19,5.037e-19,1.095e-18,1.784e-18,3.699e-18,5.682e-18,6.043e-18,1.213e-17,1.446e-17,1.201e-13,1.251e-13,3.993e-12,1.233e-11,2.094e-11,2.111e-11,2.38e-11,7.612e-11,9.046e-11,1.595e-10,2.213e-10,3.033e-10,5.186e-10,5.947e-10,7.718e-10,1.343e-09,2.023e-09,2.294e-09,3.71e-09,3.882e-09,4.344e-09,7.475e-09,7.692e-09,8.506e-09,1.541e-08,1.778e-08,4.111e-08,5.351e-08,6.043e-08,7…
FBgn0033638	2R	7506984	7528446	-	2R_7512607_SNP(trans-intra-arm)			2R_7512607_SNP	2.007e-09
FBgn0033644	2R	7563440	7565519	+	2R_7565626_SNP(cis)	2R_7565626_SNP,2R_7565316_SNP,2R_7563505_SNP	2.868e-11,3.747e-11,8.788e-10
FBgn0033653	2R	7712850	7714602	+	2R_7714446_DEL(cis)	2R_7714446_DEL,2R_7715252_SNP	3.423e-14,7.858e-08	2R_7725329_SNP,2R_7725288_SNP	1.099e-08,1.795e-08
FBgn0033668	2R	7827062	7854940	+	2R_7854617_INS(cis)	2R_7854617_INS	3.833e-10
FBgn0033674	2R	7910651	7912777	-	2R_7912732_SNP(cis)	2R_7912732_SNP	2.472e-11
FBgn0033683	2R	8026200	8026829	+	2R_8026331_SNP(cis)	2R_8026331_SNP	6.339e-16	2R_8024102_SNP,2R_8024331_SNP,2R_8021436_SNP,2R_8051603_SNP,2R_8050589_SNP,2R_8049979_SNP,2R_8052802_SNP,2R_8015913_SNP,2R_8076397_SNP,2R_8023844_SNP,2R_8015904_SNP,2R_8019960_SNP,2R_8075323_SNP,2R_8070658_SNP,2R_8072884_INS,2R_8021104_SNP,2R_8019459_SNP,2R_8061931_SNP	2.91e-12,2.265e-11,1.161e-10,1.766e-10,2.201e-10,2.276e-10,5.687e-10,4.533e-09,4.536e-09,4.604e-09,4.925e-09,6.71e-09,9.292e-09,1.026e-08,1.821e-08,2.053e-08,2.369e-08,2.906e-08
FBgn0033686	2R	8033215	8040257	+	2R_8041518_SNP(trans-intra-arm),3R_25206698_SNP(trans-inter-arm)			2R_8041524_SNP,2R_8041518_SNP,2R_8046668_SNP,2R_8031771_SNP,2R_8024238_SNP,2R_8028749_SNP,2R_8058971_SNP,2R_8056170_SNP,2R_8053610_SNP,2R_8058737_SNP,2R_8053478_SNP,2R_8019724_SNP,2R_8054163_SNP,2R_8022183_SNP,2R_8053062_SNP,2R_8053209_SNP,2R_8053605_SNP,2R_8053919_SNP,2R_8053032_SNP,2R_8052522_SNP,2R_8053581_INS,2R_8066715_SNP,2R_8061648_DEL,2R_8020426_SNP,2R_8016647_SNP,2R_8069072_SNP,2R_807229…	3.962e-17,4.128e-17,1.38e-16,7.869e-15,8.097e-15,8.822e-15,2.774e-13,3.568e-12,3.31e-11,4.659e-11,5.815e-11,1.032e-10,1.311e-10,1.855e-10,1.98e-10,2.443e-10,2.914e-10,3.756e-10,5.019e-10,8.091e-10,2.639e-09,3.448e-09,3.641e-09,7.249e-09,3.132e-08,8.332e-08,1.443e-07,2.431e-07,2.634e-07,3.314e-07,4.712e-07,5.231e-07,5.312e-07,5.838e-07,5.957e-07,6.059e-07,6.201e-07,7.128e-07,7.714e-07,8.057e-07,8.…	3L_7342760_SNP,3R_25206698_SNP	9.485e-08,7.48e-07
FBgn0033696	2R	8075843	8077882	-	2R_8076397_SNP(cis)	2R_8075323_SNP,2R_8076397_SNP	1.357e-10,6.522e-10	2R_8051603_SNP,2R_8050589_SNP,2R_8049979_SNP,2R_8052802_SNP,2R_8072884_INS,2R_8072916_SNP,2R_8070658_SNP	5.4e-11,6.426e-11,6.865e-11,1.112e-10,8.871e-10,9.57e-10,1.18e-08
FBgn0033697	2R	8078187	8079941	+	2R_8078006_INS(cis),X_3707898_SNP(trans-inter-arm),2R_1892813_SNP(trans-intra-arm),2R_7986923_SNP(trans-intra-arm)	2R_8077982_SNP,2R_8078014_SNP,2R_8077957_SNP,2R_8079175_SNP,2R_8080226_SNP,2R_8077937_SNP,2R_8079280_SNP,2R_8079569_SNP,2R_8078861_SNP,2R_8079334_SNP,2R_8078006_INS,2R_8078384_SNP,2R_8078685_SNP,2R_8077706_SNP,2R_8078974_SNP,2R_8078684_SNP,2R_8078325_SNP,2R_8080809_SNP,2R_8079629_SNP,2R_8080313_SNP,2R_8079674_SNP,2R_8079080_SNP,2R_8080483_SNP,2R_8079628_SNP,2R_8078088_SNP,2R_8079717_SNP,2R_807993…	4.209e-36,1.506e-34,2.028e-34,3.232e-34,3.907e-34,7.434e-34,9.452e-34,1.561e-33,1.715e-33,1.744e-33,3.417e-33,9.696e-29,6.792e-15,1.273e-14,5.318e-14,5.327e-14,1.632e-13,3.359e-13,9.545e-11,1.172e-10,3.068e-10,3.142e-10,3.929e-10,6.103e-10,7.206e-10,1.277e-09,1.492e-09,2.985e-09	2R_8084501_SNP,2R_8084832_SNP,2R_8090373_SNP,2R_8084634_SNP,2R_8082493_SNP,2R_8087114_SNP,2R_8084431_SNP,2R_8084529_SNP,2R_8084916_SNP,2R_8084922_SNP,2R_8090853_SNP,2R_8090938_SNP,2R_8084943_SNP,2R_8087771_SNP,2R_8084506_SNP,2R_8090941_INS,2R_8089531_SNP,2R_8087999_SNP,2R_8086891_SNP,2R_8091288_SNP,2R_8087580_SNP,2R_8086875_DEL,2R_8086831_SNP,2R_8087287_INS,2R_8086673_SNP,2R_8088154_SNP,2R_808730…	2.605e-37,3.881e-37,1.085e-36,2.96e-36,3.816e-36,3.816e-36,6.174e-36,8.488e-36,9.05e-36,9.863e-36,1.152e-35,1.221e-35,1.249e-35,1.842e-35,2.765e-35,4.295e-35,6.868e-35,7.939e-35,8.483e-35,8.774e-35,1.117e-34,1.133e-34,1.436e-34,1.902e-34,2.081e-34,3.206e-34,3.724e-34,4.4e-34,4.775e-34,4.888e-34,7.036e-34,8.176e-34,8.641e-34,1.147e-33,1.391e-33,1.736e-33,1.786e-33,3.962e-33,4.757e-33,6.412e-33,7.4…	X_15391641_SNP,X_15224974_SNP,2L_9662795_SNP,X_15391674_DEL,X_15391714_DEL,3R_12758220_SNP,X_15225072_SNP,X_3707898_SNP,2L_9119271_SNP,3L_13943113_SNP,3R_10266091_SNP,3L_9293758_INS,2L_8345775_SNP,X_3707662_DEL,X_3456853_SNP,X_3457092_SNP,3L_9292987_SNP,3R_16013504_SNP,3R_16640089_SNP	3.833e-07,5.114e-07,8.929e-07,1.439e-06,1.439e-06,1.756e-06,2.036e-06,3.392e-06,3.679e-06,3.782e-06,3.935e-06,3.939e-06,4.888e-06,5.165e-06,6.207e-06,7.298e-06,7.924e-06,8.106e-06,8.24e-06
FBgn0033716	2R	8225302	8227049	+	2R_8225454_SNP(cis)	2R_8225454_SNP,2R_8224545_SNP	6.417e-09,1.945e-08	2R_8223747_SNP,2R_8222496_INS,2R_8218037_SNP,2R_8221911_SNP,2R_8224210_SNP,2R_8244604_DEL,2R_8224247_SNP	1.344e-09,2.804e-09,3.793e-09,1.423e-08,2.108e-08,2.414e-08,1.004e-07
FBgn0033717	2R	8227115	8232122	-	2R_8232062_DEL(cis),3L_5138980_SNP(trans-inter-arm)	2R_8232062_DEL,2R_8226966_SNP,2R_8232603_SNP,2R_8227337_SNP,2R_8232033_SNP,2R_8232015_SNP,2R_8232414_SNP,2R_8226795_DEL,2R_8227785_SNP,2R_8227509_SNP,2R_8231296_SNP	6.706e-12,1.808e-10,1.633e-09,2.209e-09,2.918e-09,5.616e-09,6.431e-09,3.453e-08,3.969e-07,1.123e-06,1.358e-06	2R_8217370_SNP,2R_8239091_SNP,2R_8230551_SNP,2R_8219963_SNP,2R_8225692_SNP,2R_8221196_SNP,2R_8218915_SNP,2R_8220681_SNP,2R_8220305_SNP,2R_8224130_INS,2R_8220341_SNP,2R_8218339_SNP,2R_8224860_SNP,2R_8235794_SNP,2R_8219173_SNP,2R_8218309_SNP,2R_8240138_SNP,2R_8240371_SNP,2R_8219615_SNP,2R_8238268_SNP,2R_8242037_SNP,2R_8239150_SNP,2R_8239173_SNP,2R_8216271_SNP,2R_8216940_SNP,2R_8220888_SNP,2R_822887…	3.587e-11,5.282e-11,9.995e-11,1.181e-10,1.292e-10,1.708e-10,4.035e-10,4.331e-10,4.822e-10,5.894e-10,6.326e-10,7.124e-10,9.455e-10,9.877e-10,1.176e-09,1.218e-09,1.31e-09,2.128e-09,3.591e-09,3.634e-09,5.121e-09,5.292e-09,5.388e-09,5.67e-09,7.15e-09,7.366e-09,8.265e-09,8.391e-09,9.112e-09,9.964e-09,2.132e-08,2.236e-08,2.626e-08,2.635e-08,2.654e-08,2.812e-08,3.138e-08,3.49e-08,3.51e-08,3.686e-08,4.09…	3R_11286629_SNP,3L_5138980_SNP,3L_9802952_INS,3L_3582171_SNP	5.509e-07,5.937e-07,1.141e-06,1.52e-06
FBgn0033720	2R	8259099	8262586	+	2R_8259068_SNP(cis),3R_23796788_SNP(trans-inter-arm),2R_8261709_SNP(cis)	2R_8259068_SNP,2R_8261723_SNP,2R_8261709_SNP,2R_8258345_SNP,2R_8258557_SNP,2R_8258474_SNP,2R_8258161_SNP,2R_8258521_DEL,2R_8258299_SNP,2R_8258314_SNP,2R_8258454_SNP,2R_8262278_SNP,2R_8259794_SNP,2R_8261639_SNP,2R_8263550_SNP,2R_8258779_INS,2R_8262336_SNP,2R_8262360_SNP,2R_8262086_SNP,2R_8258381_SNP,2R_8258811_SNP,2R_8262657_SNP,2R_8259356_SNP,2R_8259396_SNP,2R_8260062_SNP,2R_8258275_SNP,2R_825889…	3.92e-19,3.351e-16,3.425e-16,2.842e-14,3.641e-14,3.681e-14,5.045e-14,1.291e-13,1.327e-13,1.645e-13,1.949e-13,9.746e-13,4.035e-12,7.049e-12,9.03e-12,9.165e-12,9.605e-12,9.67e-12,1.142e-11,1.567e-11,4.758e-11,4.758e-11,4.012e-10,8.34e-09,8.566e-09,9.081e-09,9.18e-09,5.311e-08,6.302e-08,9.102e-08,1.093e-07	2R_8267267_SNP,2R_8267346_SNP,2R_8267223_SNP,2R_8267161_SNP,2R_8260665_SNP,2R_8268259_DEL,2R_8261056_SNP,2R_8267474_SNP,2R_8264734_SNP,2R_8261358_SNP,2R_8260473_SNP,2R_8268066_SNP,2R_8256429_SNP,2R_8263623_SNP,2R_8264130_SNP,2R_8266910_SNP,2R_8265898_SNP,2R_8254845_SNP,2R_8256718_SNP,2R_8268067_SNP,2R_8261011_SNP,2R_8258049_SNP,2R_8257580_SNP,2R_8253250_SNP,2R_8253255_SNP,2R_8253041_SNP,2R_826520…	2.027e-18,2.85e-18,7.824e-18,5.117e-17,2.011e-16,9.665e-16,1.422e-15,2.442e-15,7.853e-15,8.808e-15,1.241e-14,5.839e-14,8.246e-14,1.845e-13,2.823e-13,3.147e-13,3.864e-13,4.814e-13,7.951e-13,8.586e-13,1.136e-12,1.28e-12,1.503e-12,1.632e-12,1.632e-12,1.955e-12,2.127e-12,2.448e-12,3.903e-12,4.482e-12,6.115e-12,1.162e-11,2.346e-11,2.789e-11,3.414e-11,3.761e-11,3.999e-11,4.393e-11,4.686e-11,4.987e-11,5…	2L_5652030_DEL,2L_5652038_SNP,2L_15798217_SNP,2L_5651996_SNP,3R_23796788_SNP,2L_15798024_SNP,3R_26057580_SNP,X_17301417_SNP,X_17301378_DEL	1.724e-09,2.497e-09,3.756e-08,4.243e-08,6.483e-08,1.215e-07,1.222e-07,1.386e-07,1.388e-07
FBgn0033728	2R	8289721	8292613	+	2R_8285973_SNP(trans-intra-arm)			2R_8285973_SNP	8.612e-10
FBgn0033735	2R	8312988	8314480	+	2R_8307769_SNP(trans-intra-arm),3R_10894685_SNP(trans-inter-arm)	2R_8313158_SNP,2R_8314747_SNP,2R_8314957_SNP,2R_8314504_SNP,2R_8315252_SNP,2R_8314353_SNP,2R_8315257_SNP,2R_8314398_SNP,2R_8314500_SNP,2R_8315254_SNP,2R_8313883_SNP,2R_8313287_SNP,2R_8314864_SNP,2R_8313205_INS,2R_8313358_SNP,2R_8313915_SNP,2R_8313872_SNP,2R_8313373_SNP,2R_8313957_SNP,2R_8314573_SNP,2R_8313935_SNP,2R_8313911_SNP,2R_8313916_SNP,2R_8313924_SNP	5.708e-12,1.597e-11,2.572e-10,4.828e-10,7.532e-10,1.34e-09,1.454e-09,1.558e-09,2.688e-09,3.684e-08,4.675e-08,5.748e-08,6.51e-08,7.159e-08,7.336e-08,8.109e-08,8.784e-08,1.034e-07,1.276e-07,1.439e-07,1.499e-07,1.544e-07,1.577e-07,1.579e-07	2R_8307593_SNP,2R_8311662_SNP,2R_8315722_SNP,2R_8311604_SNP,2R_8307675_SNP,2R_8307678_SNP,2R_8300698_SNP,2R_8301058_DEL,2R_8319857_SNP,2R_8299884_SNP,2R_8299949_SNP,2R_8297255_SNP,2R_8300808_DEL,2R_8307769_SNP,2R_8296614_SNP,2R_8297588_SNP,2R_8289216_INS,2R_8297210_SNP,2R_8318623_SNP,2R_8301067_SNP,2R_8297252_SNP,2R_8303517_SNP	5.26e-12,5.232e-11,5.306e-11,6.612e-11,9.566e-11,2.969e-10,2.7e-09,4.162e-09,4.987e-09,5.54e-09,8.088e-09,8.333e-09,8.344e-09,8.86e-09,1.329e-08,1.601e-08,1.647e-08,1.888e-08,2.509e-08,4.796e-08,6.103e-08,1.622e-07	2L_1646652_SNP,3R_10894667_SNP,3R_10894685_SNP,2L_17580840_DEL	7.855e-09,2.333e-08,2.727e-08,1.13e-07
FBgn0033738	2R	8318952	8324082	-	2R_8320936_SNP(trans-intra-arm)			2R_8320936_SNP	1.345e-08
FBgn0033739	2R	8324850	8340421	+	2R_8328217_SNP(trans-intra-arm)	2R_8339754_SNP,2R_8339768_SNP	1.862e-07,1.896e-07	2R_8328217_SNP,2R_8329234_SNP,2R_8329375_SNP,2R_8329927_SNP,2R_8330063_SNP,2R_8328511_SNP,2R_8333337_SNP,2R_8331812_SNP,2R_8328238_SNP,2R_8328748_SNP,2R_8335944_SNP	9.707e-10,1.066e-09,2.369e-09,4.342e-09,1.052e-08,3.993e-08,4.964e-08,6.259e-08,7.287e-08,2.026e-07,2.566e-07
FBgn0033740	2R	8353183	8359280	-	2R_8353246_SNP(cis)	2R_8353205_SNP,2R_8353285_SNP,2R_8353244_SNP,2R_8353246_SNP	2.703e-12,2.877e-12,3.374e-12,3.782e-12
FBgn0033741	2R	8356156	8359227	+	2R_8356190_SNP(cis)	2R_8356048_SNP,2R_8356190_SNP	7.086e-09,5.246e-08
FBgn0033742	2R	8359420	8361526	+	2R_8359350_DEL(cis),2R_8365852_SNP(trans-intra-arm)	2R_8359350_DEL,2R_8360331_SNP,2R_8359378_SNP,2R_8361345_SNP,2R_8360721_SNP,2R_8359403_SNP,2R_8360619_SNP,2R_8360650_SNP,2R_8359331_SNP,2R_8360628_SNP,2R_8360659_SNP,2R_8360310_SNP	2.641e-28,4.678e-25,6.873e-16,8.875e-15,1.436e-14,1.375e-12,3.864e-11,5.181e-11,7.627e-11,8.819e-11,2.32e-10,2.518e-10	2R_8366026_SNP,2R_8362663_SNP,2R_8363860_SNP,2R_8363339_SNP,2R_8365852_SNP,2R_8368374_SNP,2R_8365882_SNP,2R_8365799_SNP,2R_8365848_SNP,2R_8363533_SNP,2R_8357114_SNP,2R_8353926_SNP,2R_8356125_SNP,2R_8367963_SNP,2R_8353862_SNP,2R_8353408_SNP,2R_8363525_SNP,2R_8353339_SNP,2R_8353070_SNP,2R_8362544_SNP	3.01e-25,1.643e-23,1.144e-22,1.6e-20,2.685e-19,4.437e-17,9.661e-16,1.413e-15,1.509e-15,7.826e-14,5.141e-13,1.495e-11,5.564e-11,1.104e-10,1.416e-10,1.624e-10,6.553e-10,1.16e-09,2.677e-09,3.798e-09
FBgn0033744	2R	8361929	8375491	+	2R_8361911_SNP(cis),3L_15306452_SNP(trans-inter-arm)	2R_8361911_SNP,2R_8361904_SNP,2R_8361095_SNP,2R_8361114_SNP	1.826e-17,3.565e-17,1.409e-11,5.5e-11	2R_8355429_DEL	1.51e-10	3L_15306452_SNP	5.115e-10
FBgn0033748	2R	8395401	8398120	-	2R_8402413_SNP(trans-intra-arm)			2R_8402413_SNP,2R_8402443_SNP,2R_8402452_SNP	3.206e-12,7.025e-12,7.042e-12
FBgn0033769	2R	8578813	8580195	-	2R_8577638_SNP(trans-intra-arm)			2R_8577638_SNP	5.093e-13
FBgn0033775	2R	8728318	8730063	-	2R_8730125_INS(cis),2R_8730321_SNP(cis)	2R_8730125_INS,2R_8730321_SNP,2R_8730359_SNP,2R_8727335_SNP	7.032e-12,3.289e-11,1.339e-09,7.053e-09
FBgn0033777	2R	8736863	8756928	-	2R_8070658_SNP(trans-intra-arm),3L_10208880_SNP(trans-inter-arm),X_6913001_SNP(trans-inter-arm)			2R_8060958_SNP,2R_8060899_SNP,2R_8060917_SNP,2R_8062000_SNP,2R_8059934_SNP,2R_8061931_SNP,2R_8060810_SNP,2R_8063730_SNP,2R_8060973_SNP,2R_8060916_SNP,2R_8063706_SNP,2R_8059576_SNP,2R_8061039_SNP,2R_8062180_SNP,2R_8061873_SNP,2R_8059905_SNP,2R_8059618_SNP,2R_8059614_SNP,2R_8059616_SNP,2R_8853473_SNP,2R_8063030_SNP,2R_17249142_SNP,2R_8069132_SNP,2R_8060092_SNP,2R_8068499_SNP,2R_8062781_SNP,2R_80596…	1.084e-10,5.616e-10,5.616e-10,6.333e-10,6.422e-10,8.426e-10,1.527e-09,1.635e-09,1.78e-09,2.309e-09,2.357e-09,2.662e-09,2.932e-09,3.018e-09,3.097e-09,5.754e-09,7.978e-09,9.003e-09,9.253e-09,1.551e-08,1.578e-08,1.615e-08,2.186e-08,4.265e-08,4.437e-08,5.831e-08,6.889e-08,9.482e-08,1.017e-07,1.622e-07,1.633e-07,1.724e-07,2.723e-07,2.946e-07,5.799e-07,7.462e-07	X_6913001_SNP,X_6913004_SNP,X_6864060_SNP,X_6843879_SNP,3L_10151125_SNP,3L_10148561_SNP,3L_10208880_SNP,3L_10208614_SNP,X_6445164_SNP	3.821e-09,9.499e-09,1.529e-08,6.203e-08,3.516e-07,3.793e-07,4.07e-07,5.401e-07,6.23e-07
FBgn0033785	2R	8824396	8827917	+	2R_9359383_SNP(trans-intra-arm),2R_8516994_SNP(trans-intra-arm)			2R_9359383_SNP,2R_8516994_SNP,2R_8060973_SNP,2R_8286377_SNP,2R_8060916_SNP,2R_8061039_SNP,2R_9359426_SNP	4.078e-10,5.468e-10,9.338e-10,1.14e-09,1.974e-09,2.473e-09,3.099e-09
FBgn0033793	2R	9015420	9016557	-	2R_9012920_SNP(trans-intra-arm)			2R_9011664_SNP,2R_9012920_SNP	9.457e-10,9.53e-10
FBgn0033799	2R	9051464	9055537	-	2R_9054844_SNP(cis)	2R_9054831_SNP,2R_9054838_SNP,2R_9054844_SNP,2R_9054833_SNP,2R_9055135_SNP,2R_9055301_SNP,2R_9056219_SNP,2R_9055087_SNP,2R_9055040_SNP,2R_9055088_SNP,2R_9055092_DEL,2R_9054784_DEL,2R_9055378_SNP,2R_9055508_SNP,2R_9055529_SNP,2R_9055582_SNP	1.692e-22,2.042e-22,2.215e-22,3.226e-22,1.854e-20,1.265e-12,1.504e-12,1.929e-12,2.613e-12,3.884e-12,4.197e-12,1.052e-11,4.269e-11,2.707e-08,9.019e-08,1.372e-07	2R_9056710_SNP,2R_9057433_SNP,2R_9047820_SNP,2R_9058031_SNP,2R_9053475_SNP,2R_9057364_SNP	1.792e-08,6.461e-08,9.729e-08,1.01e-07,1.041e-07,1.337e-07	2L_14855866_SNP,2L_14855881_SNP	6.549e-08,7.408e-08
FBgn0033809	2R	9103164	9106752	-	2R_9105847_SNP(cis),X_1096272_DEL(trans-inter-arm)	2R_9105847_SNP,2R_9106537_SNP,2R_9107256_SNP,2R_9106031_SNP,2R_9105956_SNP,2R_9106703_SNP,2R_9105989_SNP,2R_9106005_INS,2R_9106289_SNP,2R_9105862_SNP,2R_9105963_DEL,2R_9105931_DEL,2R_9107555_SNP	1.767e-17,2.762e-14,3.642e-11,9.205e-11,2.788e-10,8.46e-10,9.811e-10,1.104e-08,1.15e-08,1.526e-08,1.531e-08,1.835e-08,4.618e-08	2R_9105414_SNP,2R_9105076_SNP,2R_9107842_DEL,2R_9105197_SNP,2R_9105264_SNP,2R_9105263_SNP,2R_9108026_SNP,2R_9107939_SNP,2R_9104815_SNP,2R_9108044_INS,2R_9104308_SNP	4.502e-14,1.589e-13,1.043e-10,3.638e-10,9.112e-10,1.223e-09,1.827e-09,1.837e-09,7.349e-09,1.647e-08,1.553e-07	X_1096272_DEL	2.565e-07
FBgn0033810	2R	9106901	9107756	-	2R_9107048_SNP(cis)	2R_9107048_SNP	3.791e-09
FBgn0033813	2R	9118088	9119168	+	2R_9117871_SNP(cis)	2R_9117871_SNP,2R_9118117_SNP,2R_9117998_SNP	3.729e-14,1.656e-12,6.499e-11
FBgn0033814	2R	9119263	9122801	-	2R_9120172_SNP(cis),2L_1675518_SNP(trans-inter-arm)	2R_9120172_SNP,2R_9120220_SNP,2R_9120107_SNP	1.711e-09,1.785e-09,2.079e-09			2L_1675518_SNP	5.448e-08
FBgn0033815	2R	9123485	9124560	+	2R_9123445_SNP(cis),X_13031760_SNP(trans-inter-arm)	2R_9123445_SNP,2R_9123404_DEL,2R_9123381_SNP,2R_9123366_SNP,2R_9123340_SNP,2R_9123411_SNP,2R_9123363_SNP,2R_9123393_SNP,2R_9123353_SNP,2R_9123377_SNP,2R_9123392_SNP,2R_9123387_SNP,2R_9124156_SNP	1.068e-23,3.083e-22,2.2e-21,5.97e-13,1.223e-10,3.583e-10,4.492e-10,4.627e-10,6.398e-10,7.301e-10,1.208e-09,1.463e-09,9.189e-09			X_13031760_SNP	3.858e-09
FBgn0033817	2R	9127234	9128518	+	2R_9127554_SNP(cis)	2R_9127554_SNP,2R_9128241_SNP,2R_9128229_SNP,2R_9126919_SNP,2R_9127307_SNP,2R_9128370_SNP,2R_9126888_SNP,2R_9126953_SNP,2R_9127144_SNP,2R_9127000_SNP,2R_9126990_SNP,2R_9127382_SNP,2R_9127131_SNP,2R_9127156_SNP,2R_9127449_SNP,2R_9127467_INS,2R_9127451_SNP,2R_9127248_SNP,2R_9128079_SNP,2R_9129191_SNP,2R_9127209_SNP	1.756e-20,3.229e-17,2.993e-15,4.301e-15,7.453e-15,1.267e-14,1.358e-14,3.896e-14,5.915e-14,6.409e-14,7.746e-14,1.141e-13,1.485e-13,3.557e-13,4.089e-13,4.73e-12,4.773e-12,6.599e-12,8.162e-12,2.352e-11,5.508e-09	2R_9124039_SNP,2R_9123769_SNP,2R_9124084_SNP,2R_9102642_SNP,2R_9123877_SNP,2R_9122799_SNP,2R_9114338_SNP,2R_9100998_SNP,2R_9115366_SNP,2R_9102763_SNP,2R_9101707_SNP,2R_9102301_SNP,2R_9140590_SNP,2R_9115849_SNP,2R_9102302_SNP,2R_9102869_SNP,2R_9134788_SNP,2R_9102378_SNP,2R_9102160_SNP,2R_9101672_SNP,2R_9101683_DEL,2R_9101661_SNP,2R_9101948_SNP	3.74e-12,2.623e-11,6.063e-11,1.524e-10,5.013e-10,5.467e-10,3.634e-09,1.104e-08,2.014e-08,2.24e-08,3.925e-08,4.226e-08,4.399e-08,4.775e-08,4.88e-08,4.884e-08,7.326e-08,8.629e-08,1.025e-07,1.283e-07,1.283e-07,1.306e-07,1.994e-07
FBgn0033821	2R	9145391	9145982	+	2R_9149256_SNP(trans-intra-arm),X_4448352_SNP(trans-inter-arm),2R_9145955_SNP(cis)	2R_9146064_SNP,2R_9145955_SNP	1.443e-09,2.412e-09	2R_9149256_SNP,2R_9147435_SNP,2R_9147482_SNP,2R_9147438_SNP,2R_9147422_SNP,2R_9147337_SNP	1.371e-12,7.494e-10,1.689e-09,1.792e-09,4.636e-09,4.62e-08	X_4448807_SNP,X_4448578_SNP,X_4448352_SNP,X_4448433_SNP,X_4448981_SNP,X_4448620_SNP,X_4448847_SNP,X_4448585_SNP	2.955e-08,3.977e-08,4.565e-08,4.828e-08,8.747e-08,9.153e-08,1.001e-07,1.138e-07
FBgn0033826	2R	9184707	9185972	-	2R_9186186_SNP(cis),2R_9185129_SNP(cis)	2R_9186199_DEL,2R_9186186_SNP,2R_9186466_SNP,2R_9186460_SNP,2R_9185129_SNP,2R_9186394_SNP,2R_9186795_DEL,2R_9184930_SNP,2R_9186154_SNP,2R_9184900_DEL,2R_9184894_DEL,2R_9184916_SNP,2R_9186932_SNP,2R_9186575_SNP,2R_9184782_SNP,2R_9186528_INS,2R_9184078_SNP	1.204e-14,1.418e-14,1.635e-12,3.249e-12,2.415e-11,3.279e-09,3.465e-09,7.55e-09,2.378e-08,2.563e-08,4.911e-08,5.332e-08,3.396e-07,8.132e-07,3.287e-06,3.449e-06,3.706e-06	2R_9188422_SNP,2R_9172335_SNP,2R_9192025_SNP,2R_9188297_SNP,2R_9174224_SNP,2R_9172821_SNP,2R_9187464_SNP,2R_9189114_SNP,2R_9187479_SNP,2R_9188450_SNP,2R_9187439_SNP,2R_9187448_SNP,2R_9187633_DEL,2R_9170815_SNP,2R_9187645_SNP,2R_9170817_SNP,2R_9193375_SNP,2R_9170621_SNP,2R_9189231_SNP,2R_9192270_SNP,2R_9188692_SNP,2R_9192275_SNP,2R_9170791_SNP,2R_9194764_SNP,2R_9174500_SNP,2R_9192258_SNP,2R_919581…	1.427e-09,2.208e-09,3.856e-09,4.259e-09,7.667e-09,1.074e-08,1.091e-08,1.118e-08,1.168e-08,1.189e-08,1.203e-08,1.203e-08,1.33e-08,1.356e-08,1.376e-08,1.436e-08,1.573e-08,2.079e-08,2.566e-08,3.011e-08,3.028e-08,3.575e-08,3.633e-08,3.659e-08,5.249e-08,5.309e-08,5.495e-08,5.746e-08,7.154e-08,7.25e-08,7.305e-08,7.928e-08,8.674e-08,8.803e-08,9.106e-08,9.663e-08,9.837e-08,1.069e-07,1.072e-07,1.124e-07,1…	3L_792805_SNP,3L_792804_SNP,3R_8359115_SNP	2.131e-06,2.877e-06,3.414e-06
FBgn0033875	2R	9727558	9729248	+	X_13444579_SNP(trans-inter-arm)					X_13444579_SNP	1.224e-13
FBgn0033879	2R	9740452	9741836	-	2R_9741350_SNP(cis)	2R_9741350_SNP,2R_9741313_SNP,2R_9741592_SNP	3.155e-09,2.704e-08,3.682e-08
FBgn0033883	2R	9747854	9749507	-	2R_9743488_SNP(trans-intra-arm),2R_9750739_SNP(trans-intra-arm)			2R_9743488_SNP,2R_9750739_SNP	1.768e-10,7.614e-10
FBgn0033903	2R	10052556	10054496	+	2R_10052553_SNP(cis)	2R_10052504_SNP,2R_10052455_SNP,2R_10052553_SNP,2R_10052496_SNP,2R_10052459_SNP,2R_10052383_SNP,2R_10052381_SNP,2R_10052368_INS,2R_10052265_SNP,2R_10052314_SNP,2R_10052289_SNP,2R_10052275_SNP,2R_10052168_SNP,2R_10051944_SNP,2R_10052648_DEL,2R_10052842_SNP	7.324e-18,8.538e-18,1.137e-17,1.534e-17,2.294e-17,8.551e-16,2.283e-15,1.204e-13,3.568e-13,4.466e-13,8.175e-13,8.253e-13,2.231e-12,2.819e-09,5.556e-09,6.18e-08	2R_10051507_SNP,2R_10051447_SNP,2R_10050973_SNP,2R_10051438_SNP,2R_10051225_SNP	6.094e-12,1.406e-11,3.826e-08,3.049e-07,3.813e-07
FBgn0033904	2R	10054487	10055738	+	2R_10054589_SNP(cis),2L_20522742_SNP(trans-inter-arm)	2R_10054589_SNP,2R_10053737_SNP,2R_10053875_SNP,2R_10056417_SNP,2R_10054874_SNP,2R_10054278_SNP,2R_10054271_SNP,2R_10054255_SNP,2R_10054936_SNP,2R_10055154_SNP	1.373e-21,9.534e-18,2.597e-12,2.663e-09,1.331e-08,1.391e-08,5.823e-08,9.976e-08,1.003e-07,1.145e-07	2R_10059303_SNP,2R_10066516_SNP,2R_10058421_SNP,2R_10060864_SNP,2R_10044004_SNP,2R_10059448_SNP,2R_10062412_SNP,2R_10059551_SNP,2R_10059447_SNP	6.576e-12,5.665e-09,1.053e-08,2.393e-08,3.553e-08,5.896e-08,5.951e-08,7.379e-08,1.476e-07	2L_20522742_SNP	1.887e-07
FBgn0033906	2R	10057967	10060503	+	2R_10059839_SNP(cis)	2R_10059839_SNP,2R_10060129_SNP,2R_10057139_SNP,2R_10057336_SNP,2R_10058300_DEL	9.023e-10,3.736e-09,1.046e-08,3.14e-08,4.539e-08	2R_10068526_SNP,2R_10068126_SNP,2R_10062480_DEL	7.831e-09,1.161e-08,1.58e-08
FBgn0033907	2R	10060491	10061133	-	2R_10061382_SNP(cis)	2R_10061382_SNP,2R_10060653_SNP,2R_10061096_SNP,2R_10060586_SNP,2R_10060578_SNP,2R_10060325_SNP,2R_10060043_SNP,2R_10060286_SNP	2.365e-10,3.898e-10,1.202e-09,1.684e-09,1.836e-09,5.83e-09,2.703e-08,4.564e-08
FBgn0033928	2R	10249429	10250330	+	2R_10249307_SNP(cis),2R_10249462_SNP(cis)	2R_10249343_SNP,2R_10249850_SNP,2R_10250433_SNP,2R_10249901_SNP,2R_10250450_SNP,2R_10250363_SNP,2R_10249462_SNP,2R_10249306_SNP,2R_10249307_SNP,2R_10249447_SNP,2R_10249367_SNP,2R_10249511_SNP,2R_10249475_SNP,2R_10249405_SNP,2R_10249745_SNP,2R_10249498_SNP,2R_10250414_SNP,2R_10248610_SNP	2.654e-10,4.603e-10,6.114e-10,6.234e-10,8.007e-10,1.991e-09,3.666e-09,5.487e-09,6.056e-09,1.609e-08,2.417e-08,1.371e-07,1.532e-07,3.332e-07,4.326e-07,4.856e-07,1.143e-06,1.464e-06	2R_10248192_SNP,2R_10251434_SNP,2R_10251361_SNP,2R_10245759_SNP,2R_10251415_SNP,2R_10248317_SNP,2R_10244929_SNP,2R_10236844_SNP,2R_10236903_SNP,2R_10245768_DEL,2R_10247605_SNP,2R_10247466_SNP,2R_10248268_SNP,2R_10248293_DEL,2R_10248290_SNP,2R_10248264_MNP,2R_10248195_SNP,2R_10248291_SNP,2R_10248300_SNP,2R_10238229_SNP,2R_10248218_SNP,2R_10248140_SNP,2R_10248143_SNP,2R_10253302_SNP,2R_10247924_SNP…	1.372e-10,1.385e-10,1.534e-10,2.858e-10,5.608e-10,7.74e-10,7.767e-10,7.812e-10,8.625e-10,8.718e-10,9.281e-10,9.497e-10,1.055e-09,1.07e-09,1.127e-09,1.13e-09,1.271e-09,1.292e-09,1.436e-09,1.505e-09,1.91e-09,1.972e-09,2.136e-09,2.164e-09,2.237e-09,3.022e-09,3.393e-09,3.396e-09,3.664e-09,3.664e-09,4.1e-09,4.211e-09,5.233e-09,7.422e-09,8.117e-09,8.147e-09,9.552e-09,1.224e-08,1.319e-08,1.355e-08,1.382…	2L_2144429_SNP	1.515e-06
FBgn0033932	2R	10265602	10272864	+	2R_17645313_SNP(trans-intra-arm)			2R_17645313_SNP	4.898e-09
FBgn0033963	2R	10645412	10647107	-	2R_10646955_SNP(cis)	2R_10646955_SNP,2R_10646950_SNP,2R_10646897_SNP,2R_10646936_SNP,2R_10646947_SNP,2R_10646966_SNP,2R_10646965_SNP,2R_10647035_SNP,2R_10647041_SNP	5.134e-14,8.187e-12,9.86e-11,2.387e-10,1.591e-09,2.386e-09,4.469e-09,1.851e-08,2.564e-08
FBgn0033968	2R	10695924	10697436	+	3L_10947495_SNP(trans-inter-arm),3L_10260421_INS(trans-inter-arm)					3L_10947495_SNP,3L_10260421_INS	3.786e-09,3.185e-08
FBgn0033970	2R	10720337	10721456	+	3L_15042066_SNP(trans-inter-arm)					3L_15042066_SNP,3L_15042051_DEL,3L_15042049_INS,3L_15042072_SNP,3L_15042048_SNP	9.441e-09,1.724e-08,1.894e-08,2.846e-08,1.193e-07
FBgn0033972	2R	10741368	10742553	-	2R_10742521_SNP(cis)	2R_10742521_SNP,2R_10741622_SNP,2R_10741465_SNP,2R_10740841_SNP	1.981e-29,1.093e-11,2.292e-11,7.686e-11	2R_10746487_SNP,2R_10745598_SNP,2R_10789205_SNP,2R_10789408_SNP,2R_10745669_SNP,2R_10748273_SNP,2R_10746396_SNP,2R_10746358_SNP,2R_10746093_SNP,2R_10746159_SNP	2.059e-12,1.101e-10,3.897e-09,3.897e-09,4.613e-09,4.761e-09,1.02e-08,1.564e-08,2.581e-08,1.141e-07	4_743620_DEL	2.928e-08
FBgn0033978	2R	10763334	10765159	+	2R_10763318_SNP(cis),2R_10796635_SNP(trans-intra-arm)	2R_10763318_SNP,2R_10763630_SNP,2R_10764509_SNP,2R_10764362_SNP,2R_10764465_SNP,2R_10764512_SNP,2R_10763674_SNP	7.342e-23,5.308e-19,2.118e-15,1.223e-10,1.446e-09,1.727e-09,5.334e-08	2R_10761412_SNP,2R_10802814_SNP,2R_10796587_SNP,2R_10796635_SNP	3.791e-12,6.1e-09,3.205e-08,3.753e-08	X_8668587_SNP	7.66e-09
FBgn0033981	2R	10772769	10774452	-	2R_10774491_SNP(cis),2R_10789262_SNP(trans-intra-arm)	2R_10774491_SNP,2R_10771854_INS	9.647e-12,5.353e-09	2R_10786052_SNP,2R_10792504_SNP,2R_10776487_SNP,2R_10792458_SNP,2R_10790272_SNP,2R_10789262_SNP	2.205e-11,1.202e-09,1.55e-09,2.021e-09,4.953e-09,1.385e-08
FBgn0033987	2R	10850797	10868300	+	2R_10840992_SNP(trans-intra-arm),2R_10859421_SNP(trans-intra-arm)			2R_10840992_SNP,2R_10859422_SNP,2R_10856258_SNP,2R_10859421_SNP,2R_10844935_SNP,2R_10859269_SNP,2R_10856321_SNP,2R_10838454_INS,2R_10861630_SNP	2.521e-21,3.062e-17,1.1e-15,5.457e-15,7.611e-15,8.26e-15,3.925e-14,4.508e-14,4.16e-11
FBgn0033990	2R	10879837	10881340	-	2R_17334736_SNP(trans-intra-arm)			2R_17334736_SNP	4.003e-08
FBgn0033998	2R	11094032	11101139	-	2R_17622275_SNP(trans-intra-arm)			2R_17622275_SNP	1.409e-08
FBgn0034009	2R	11205322	11209676	-	2L_11199721_SNP(trans-inter-arm)					2L_11199721_SNP	3.532e-09
FBgn0034025	2R	11399215	11403102	+	2R_11400016_SNP(cis)	2R_11400101_SNP,2R_11400106_SNP,2R_11400079_SNP,2R_11400046_SNP,2R_11400016_SNP,2R_11399833_SNP,2R_11399827_SNP,2R_11399407_SNP,2R_11399562_SNP,2R_11399028_INS,2R_11399094_SNP,2R_11399045_SNP,2R_11400187_SNP,2R_11399041_SNP,2R_11398943_SNP,2R_11399055_SNP,2R_11399025_SNP,2R_11399010_SNP,2R_11399011_SNP	1.795e-24,1.873e-24,2.636e-24,1.902e-23,2.933e-23,1.46e-11,2.411e-10,6.643e-09,3.007e-08,8.179e-08,9.105e-08,1.122e-07,1.774e-07,1.798e-07,2.313e-07,3.105e-07,3.518e-07,7.542e-07,7.737e-07	2R_11400417_SNP,2R_11401431_SNP,2R_11400824_SNP,2R_11392416_SNP,2R_11412682_SNP,2R_11392089_SNP,2R_11401689_SNP,2R_11393820_SNP,2R_11401542_SNP,2R_11410983_SNP	4.951e-12,9.914e-10,5.485e-08,2.37e-07,2.724e-07,3.786e-07,4.629e-07,5.694e-07,7.1e-07,7.202e-07	3L_4919209_SNP,3L_13903504_SNP	5.269e-07,8.224e-07
FBgn0034033	2R	11460649	11461496	-	2R_11461243_SNP(cis)	2R_11461243_SNP	1.733e-08
FBgn0034053	2R	11830369	11834771	+	2R_11829844_SNP(cis),2R_11824122_SNP(trans-intra-arm)	2R_11829844_SNP	1.75e-12	2R_11827883_DEL,2R_11827320_SNP,2R_11824122_SNP	1.311e-09,1.479e-08,3.561e-08
FBgn0034057	2R	11877188	11878791	-	2R_11878777_SNP(cis)	2R_11878777_SNP,2R_11878125_SNP,2R_11878095_SNP,2R_11878122_SNP,2R_11878071_SNP,2R_11878083_SNP,2R_11879749_SNP,2R_11878735_SNP,2R_11878211_SNP,2R_11878273_SNP,2R_11878215_SNP	3.903e-11,1.805e-10,2.127e-09,4.266e-09,4.909e-09,5.07e-09,2.263e-08,6.921e-08,1.024e-07,1.394e-07,3.051e-07	2R_11879875_SNP,2R_11879873_SNP,2R_11880074_SNP,2R_11880191_SNP,2R_11880839_SNP,2R_11879847_SNP	3.658e-09,1.121e-08,1.647e-08,2.916e-08,4.423e-08,2.311e-07
FBgn0034058	2R	11878872	11879880	-	2R_11879847_SNP(cis),2R_11883504_SNP(trans-intra-arm)	2R_11879847_SNP,2R_11879875_SNP,2R_11879873_SNP,2R_11880839_SNP,2R_11879749_SNP,2R_11878122_SNP,2R_11878391_SNP,2R_11879857_SNP,2R_11880649_SNP,2R_11879590_SNP,2R_11880064_SNP,2R_11880107_SNP,2R_11879425_SNP,2R_11879539_SNP	1.314e-23,5.801e-21,9.648e-20,2.191e-19,9.188e-16,1.45e-14,8.317e-10,1.527e-09,5.871e-09,1.391e-07,3.087e-07,3.817e-07,4.796e-07,4.833e-07	2R_11881281_SNP,2R_11881534_SNP,2R_11881964_SNP,2R_11882083_SNP,2R_11882077_SNP,2R_11877270_SNP,2R_11877222_SNP,2R_11877664_SNP,2R_11883504_SNP,2R_11877804_SNP,2R_11883276_SNP,2R_11882215_SNP,2R_11882421_SNP,2R_11881605_SNP,2R_11882101_SNP,2R_11885170_SNP,2R_11882113_SNP,2R_11882116_SNP,2R_11883017_SNP	7.963e-15,1.382e-12,3.089e-11,5.486e-11,1.871e-10,5.343e-10,1.361e-09,1.602e-09,2.149e-09,2.989e-09,5.191e-09,1.836e-08,4.077e-08,4.45e-08,1.21e-07,4.309e-07,4.435e-07,4.435e-07,4.572e-07
FBgn0034059	2R	11879913	11881212	+	2R_11879875_SNP(cis)	2R_11879875_SNP,2R_11879847_SNP,2R_11879873_SNP,2R_11880839_SNP,2R_11879749_SNP,2R_11881281_SNP,2R_11881534_SNP,2R_11881964_SNP,2R_11882083_SNP,2R_11882077_SNP,2R_11882146_SNP	1.077e-15,6.424e-15,5.876e-14,8.924e-14,4.512e-13,8.992e-12,4.954e-10,2.517e-09,6.125e-09,2.936e-08,1.449e-07	2R_11878122_SNP,2R_11878777_SNP,2R_11878125_SNP,2R_11877270_SNP,2R_11883017_SNP,2R_11877222_SNP,2R_11882215_SNP,2R_11883024_SNP	3.471e-12,1.324e-09,7.446e-09,1.06e-08,2.682e-08,7.361e-08,7.441e-08,9.909e-08
FBgn0034072	2R	11968681	11986069	-	2R_11985773_SNP(cis)	2R_11985773_SNP	6.02e-09
FBgn0034081	2R	12036317	12037300	-	3L_6735946_DEL(trans-inter-arm),X_18871036_INS(trans-inter-arm)					3L_6735946_DEL,X_18871036_INS	2.139e-12,6.363e-12
FBgn0034083	2R	12037628	12057024	+	2R_12032265_SNP(trans-intra-arm)			2R_12032262_SNP,2R_12032265_SNP	4.746e-09,4.851e-09
FBgn0034095	2R	12117703	12121592	+	2R_12118261_SNP(cis)	2R_12118261_SNP,2R_12118092_SNP,2R_12118278_SNP,2R_12118230_SNP,2R_12118363_SNP	2.305e-10,8.275e-10,2.144e-09,1.295e-08,7.022e-08	2R_12118975_SNP	1.761e-09
FBgn0034122	2R	12251056	12253400	-	2R_12253622_SNP(cis)	2R_12253622_SNP,2R_12253679_SNP,2R_12253666_DEL	2.967e-19,2.947e-14,6.824e-14
FBgn0034141	2R	12474550	12476689	-	2R_12474752_SNP(cis),2R_12476371_SNP(cis)	2R_12474752_SNP,2R_12474550_SNP,2R_12474693_SNP,2R_12474609_SNP,2R_12474615_SNP,2R_12476371_SNP,2R_12474519_SNP,2R_12474627_SNP,2R_12476370_SNP,2R_12474580_SNP,2R_12474468_SNP	2.74e-12,1.252e-11,6.011e-11,1.614e-09,1.788e-09,4.068e-09,7.755e-09,1.548e-08,1.768e-08,9.789e-08,1.99e-07			2L_8796015_SNP	1.365e-07
FBgn0034158	2R	12671176	12679977	+	2R_12675899_SNP(trans-intra-arm),2R_12673095_SNP(trans-intra-arm)			2R_12675899_SNP,2R_12675883_SNP,2R_12675779_SNP,2R_12675914_SNP,2R_12675786_SNP,2R_12676227_SNP,2R_12673095_SNP,2R_12675818_SNP	4.076e-21,2.757e-17,1.886e-15,2.867e-15,8.077e-15,5.894e-10,2.304e-09,3.174e-08
FBgn0034166	2R	12768218	12772200	+	2R_12766885_SNP(trans-intra-arm)			2R_12766885_SNP	2.411e-08
FBgn0034175	2R	12886115	12887631	-	2R_12887807_SNP(cis)	2R_12887807_SNP,2R_12887605_SNP,2R_12888368_SNP	3.774e-11,3.978e-09,5.708e-09
FBgn0034176	2R	12887749	12889446	-	3L_15029350_SNP(trans-inter-arm)					3L_15029350_SNP	1.775e-08
FBgn0034229	2R	13399018	13401360	+	2R_13399733_SNP(cis)	2R_13399733_SNP	4.914e-12
FBgn0034237	2R	13423718	13426647	+	2R_13422704_SNP(trans-intra-arm),2R_13426686_SNP(cis)	2R_13423882_SNP,2R_13423826_SNP,2R_13424110_SNP,2R_13423646_SNP,2R_13424003_SNP,2R_13423673_INS,2R_13423547_INS,2R_13426487_SNP,2R_13426686_SNP,2R_13423556_SNP,2R_13424206_SNP,2R_13422984_SNP,2R_13424626_SNP,2R_13426281_SNP,2R_13423610_DEL	6.804e-10,7.728e-10,7.763e-10,1.567e-09,2.347e-09,3.181e-09,5.577e-08,6.866e-08,8.186e-08,9.223e-08,9.908e-08,1.506e-07,2.541e-07,2.858e-07,3.863e-07	2R_13422704_SNP	4.68e-10
FBgn0034261	2R	13571079	13578327	+	2R_13576099_SNP(trans-intra-arm),X_18668795_SNP(trans-inter-arm)			2R_13576099_SNP,2R_13575477_SNP,2R_13575108_SNP,2R_13575929_SNP,2R_13575168_SNP,2R_13575617_SNP,2R_13575046_SNP,2R_13575043_SNP,2R_13575177_SNP,2R_13575011_SNP,2R_13575548_SNP,2R_13575159_SNP,2R_13575824_SNP,2R_13575021_SNP,2R_13576085_SNP,2R_13576214_SNP,2R_13574018_SNP,2R_13576098_SNP,2R_13576154_SNP,2R_13576259_SNP	1.081e-09,2.1e-09,2.865e-09,2.935e-09,5.152e-09,2.015e-08,4.354e-08,4.66e-08,6.072e-08,6.308e-08,6.859e-08,7.053e-08,1.008e-07,1.112e-07,1.161e-07,1.235e-07,1.903e-07,2.872e-07,3.017e-07,3.828e-07	X_18668795_SNP	6.896e-08
FBgn0034270	2R	13625127	13627190	-	2R_13627412_SNP(cis)	2R_13627412_SNP	1.762e-11
FBgn0034276	2R	13641060	13643927	-	2R_13638122_SNP(trans-intra-arm),2R_13638218_DEL(trans-intra-arm)			2R_13638122_SNP,2R_13638212_SNP,2R_13638218_DEL,2R_13638252_SNP,2R_13638288_SNP,2R_13638882_SNP,2R_13638114_SNP,2R_13638127_SNP,2R_13638120_SNP,2R_13642782_SNP	1.918e-13,7.475e-11,1.484e-10,1.556e-09,1.783e-09,1.786e-08,3.551e-08,7.131e-08,1.826e-07,3.137e-07	2L_19798143_DEL	1.973e-07
FBgn0034290	2R	13929801	13931249	-	2R_13931235_SNP(cis)	2R_13931235_SNP,2R_13930813_SNP	2.385e-12,3.098e-08
FBgn0034291	2R	13931551	13932578	-	2R_13932784_SNP(cis)	2R_13932784_SNP	3.22e-14
FBgn0034304	2R	14035601	14038915	-	2R_14036289_SNP(cis)	2R_14036289_SNP,2R_14036051_SNP,2R_14035649_SNP	7.371e-12,1.38e-08,7.338e-08
FBgn0034312	2R	14061174	14063230	+	2R_14059374_SNP(trans-intra-arm)			2R_14059374_SNP	1.569e-08
FBgn0034318	2R	14076483	14077159	+	2R_14077090_SNP(cis)	2R_14077090_SNP,2R_14077068_SNP,2R_14077198_SNP,2R_14077318_SNP,2R_14076941_SNP	2.187e-09,2.575e-09,4.257e-09,4.782e-09,9.723e-09
FBgn0034321	2R	14176201	14182217	+	2R_14176988_DEL(cis)	2R_14176988_DEL,2R_14176951_SNP,2R_14176944_SNP,2R_14176906_SNP,2R_14176762_SNP	7.994e-20,3.07e-19,6.636e-19,5.834e-14,4.565e-11
FBgn0034322	2R	14182264	14183163	+	2R_14176951_SNP(trans-intra-arm)			2R_14176944_SNP,2R_14176906_SNP,2R_14176988_DEL,2R_14176951_SNP,2R_14176438_DEL,2R_14176762_SNP,2R_14176419_SNP	7e-18,9.552e-18,2.349e-17,3.734e-16,1.732e-14,1.452e-11,3.436e-11
FBgn0034328	2R	14270209	14270740	-	2R_14269728_SNP(cis)	2R_14269728_SNP,2R_14270807_SNP,2R_14270270_SNP,2R_14270272_SNP,2R_14270288_SNP,2R_14270282_SNP	5.619e-12,5.47e-11,9.858e-11,9.858e-11,9.858e-11,1.16e-10
FBgn0034330	2R	14272072	14272416	+	2R_14272189_SNP(cis),2R_14272328_SNP(cis)	2R_14272189_SNP,2R_14272147_SNP,2R_14272149_SNP,2R_14272163_SNP,2R_14272328_SNP,2R_14272400_SNP,2R_14272347_SNP,2R_14272404_SNP,2R_14272157_SNP,2R_14272406_SNP,2R_14272411_DEL,2R_14271976_SNP,2R_14271974_SNP	2.457e-15,9.56e-14,1.17e-13,1.076e-12,2.705e-10,2.964e-10,3.454e-10,1.811e-09,3.881e-09,6.385e-09,3.698e-08,8.496e-08,2.195e-07
FBgn0034351	2R	14338789	14340241	+	2R_14339041_SNP(cis)	2R_14339041_SNP,2R_14339291_SNP,2R_14339348_SNP,2R_14339294_SNP,2R_14339035_SNP,2R_14339933_SNP,2R_14340234_SNP,2R_14337837_SNP,2R_14339150_SNP,2R_14340277_SNP,2R_14338340_SNP,2R_14339840_SNP,2R_14338110_SNP	1.698e-12,1.815e-12,2.04e-12,4.34e-12,5.292e-12,2.042e-11,2.269e-11,3.64e-10,3.658e-10,6.267e-10,1.393e-08,3.342e-07,1.015e-06	2R_14335993_SNP,2R_14344012_SNP,2R_14333936_SNP,2R_14335855_SNP,2R_14334131_SNP,2R_14335606_SNP,2R_14344445_SNP,2R_14336095_SNP,2R_14336335_SNP,2R_14334125_SNP,2R_14336215_SNP,2R_14335460_SNP,2R_14336696_SNP,2R_14336356_SNP,2R_14336681_SNP,2R_14334121_DEL,2R_14343138_SNP,2R_14335149_SNP,2R_14335517_SNP,2R_14334478_SNP,2R_14335403_SNP,2R_14346426_SNP,2R_14334108_INS,2R_14335362_SNP,2R_14336450_SNP	2.164e-11,4.101e-11,5.676e-11,5.676e-11,9.384e-11,1.068e-10,3.195e-10,3.575e-10,1.739e-09,2.182e-09,3.534e-09,3.602e-09,3.703e-09,4.084e-09,4.396e-09,5.381e-09,1.893e-08,4.314e-08,7.783e-08,1.276e-07,1.473e-07,2.624e-07,4.612e-07,6.058e-07,8.112e-07	3R_15647317_SNP,2L_9440149_SNP,2L_2926102_SNP	8.678e-07,1.006e-06,1.154e-06
FBgn0034354	2R	14391113	14392530	+	2R_14391796_SNP(cis)	2R_14391796_SNP,2R_14391650_SNP,2R_14391793_SNP,2R_14391470_SNP,2R_14391410_SNP,2R_14391432_SNP,2R_14392057_SNP,2R_14391590_INS,2R_14391493_SNP,2R_14392060_SNP,2R_14392375_SNP,2R_14391506_SNP,2R_14392362_SNP,2R_14392297_SNP,2R_14392340_SNP,2R_14391277_SNP,2R_14391553_SNP,2R_14391607_SNP,2R_14391575_SNP,2R_14391605_SNP,2R_14391584_SNP,2R_14392307_SNP,2R_14391586_SNP,2R_14391571_SNP,2R_14391061_SNP…	5.474e-19,1.741e-17,2.32e-16,1.935e-15,2.979e-15,9.388e-15,5.144e-14,5.82e-14,8.575e-14,8.665e-14,9.229e-14,9.44e-14,1.544e-13,2.492e-13,3.048e-13,4.175e-13,3.188e-11,3.336e-11,3.878e-11,4.812e-11,4.838e-11,5.309e-11,5.443e-11,6.722e-11,5.812e-10,8.774e-10,8.902e-10,1.214e-09,1.216e-09,1.393e-09,1.729e-09,2.033e-09,2.064e-09,2.309e-09,2.391e-09,4.867e-09,5.619e-09,9.64e-09,1.121e-08,1.301e-08,1.3…	2R_14389014_SNP,2R_14388998_SNP,2R_14388912_SNP,2R_14394588_SNP,2R_14388920_SNP,2R_14389175_SNP,2R_14386687_SNP,2R_8615196_SNP	1.874e-09,3.315e-09,2.005e-08,2.311e-08,3.057e-08,7.783e-08,9.973e-08,1.699e-07	X_4607350_SNP,X_9685346_SNP	6.379e-07,7.904e-07
FBgn0034356	2R	14414935	14423254	+	2R_14415748_SNP(cis),2R_14414745_SNP(cis)	2R_14415748_SNP,2R_14415749_SNP,2R_14413986_SNP,2R_14414745_SNP,2R_14415185_SNP,2R_14415184_SNP,2R_14414479_SNP,2R_14414487_SNP,2R_14414472_SNP,2R_14414471_SNP,2R_14415621_SNP,2R_14415646_SNP,2R_14415658_SNP,2R_14415502_SNP,2R_14414109_SNP,2R_14415788_SNP,2R_14414232_SNP,2R_14414084_DEL,2R_14414779_SNP,2R_14415787_SNP,2R_14415637_SNP	1.571e-11,1.881e-11,9.617e-11,2.908e-10,4.136e-09,4.412e-09,8.737e-09,1.307e-08,2.198e-08,3.424e-08,1.944e-07,1.944e-07,1.944e-07,2.568e-07,4.001e-07,4.003e-07,4.929e-07,6.024e-07,8.222e-07,8.627e-07,1.13e-06	2R_14409725_SNP,2R_14415964_SNP,2R_14408732_SNP,2R_14417255_SNP,2R_14416919_SNP,2R_14408741_SNP,2R_14413756_DEL,2R_14411468_SNP,2R_14408582_SNP,2R_14416269_SNP,2R_14416193_SNP,2R_12501597_SNP,2R_14416184_DEL,2R_14408735_SNP,2R_12501595_SNP,2R_14410761_SNP,2R_14416090_SNP,2R_12501594_SNP,2R_14418848_SNP,2R_12501505_SNP,2R_14412004_SNP,2R_14408219_SNP,2R_14416214_SNP,2R_14416089_SNP,2R_14410718_SNP…	5.325e-11,5.429e-10,4.631e-09,6.538e-09,8.18e-09,1.98e-08,2.036e-08,2.275e-08,2.699e-08,2.924e-08,3.387e-08,3.621e-08,3.714e-08,4.099e-08,4.577e-08,5.609e-08,5.872e-08,6.64e-08,7.279e-08,7.409e-08,1.276e-07,1.736e-07,1.846e-07,1.869e-07,1.916e-07,1.944e-07,1.944e-07,2.13e-07,3.106e-07,3.24e-07,3.831e-07,4.159e-07,4.845e-07,4.884e-07,5.88e-07,5.96e-07,7.534e-07,7.628e-07,8.253e-07,9.54e-07,1.045e-…
FBgn0034361	2R	14501715	14502523	-	2R_14502330_SNP(cis),2R_14503680_SNP(trans-intra-arm),2R_14501976_SNP(cis)	2R_14502330_SNP,2R_14502158_SNP,2R_14502740_SNP,2R_14502203_SNP,2R_14502559_SNP,2R_14501447_SNP,2R_14501324_SNP,2R_14501445_SNP,2R_14501438_SNP,2R_14501976_SNP,2R_14502550_SNP	1.038e-20,1.456e-17,8.986e-15,4.168e-13,5.021e-13,6.968e-09,8.554e-09,9.859e-09,1.063e-08,4.52e-08,1.635e-07	2R_14503680_SNP,2R_14506400_SNP,2R_14506412_SNP,2R_14506385_SNP,2R_14503931_SNP,2R_14503830_SNP,2R_14504685_DEL,2R_14504181_SNP,2R_14503722_SNP,2R_14506375_SNP,2R_14506207_SNP,2R_14506021_SNP,2R_14498892_SNP,2R_14506025_SNP,2R_14506040_DEL,2R_14504699_SNP,2R_14506127_INS,2R_14505104_SNP,2R_14505890_SNP,2R_14506513_SNP,2R_14506692_SNP,2R_14506287_INS,2R_14495630_SNP	3.472e-18,1.882e-13,1.428e-12,2.127e-12,4.01e-12,5.791e-12,1.118e-11,3.914e-11,5.797e-11,6.079e-11,1.356e-10,1.639e-10,4.354e-10,9.785e-10,1.067e-09,1.46e-09,2.586e-08,4.972e-08,5.154e-08,9.846e-08,9.9e-08,1.08e-07,1.16e-07
FBgn0034365	2R	14509046	14510491	+	2R_14509228_SNP(cis)	2R_14509228_SNP	9.529e-11
FBgn0034366	2R	14507971	14512549	-	2R_14512964_SNP(cis),2R_14510851_SNP(trans-intra-arm)	2R_14512964_SNP,2R_14513288_SNP,2R_14512529_DEL,2R_14513021_SNP,2R_14511906_SNP,2R_14511890_SNP,2R_14511912_SNP,2R_14511914_SNP,2R_14513549_SNP,2R_14511908_SNP,2R_14513532_SNP,2R_14511629_SNP,2R_14511880_SNP	2.052e-10,2.191e-10,2.53e-10,9.907e-10,1.345e-09,2.35e-09,2.747e-09,2.822e-09,7.151e-09,1.081e-08,1.481e-08,2.132e-07,3.246e-07	2R_14510683_SNP,2R_14510797_SNP,2R_14515396_SNP,2R_14515442_SNP,2R_14510851_SNP,2R_14515495_SNP,2R_14509485_SNP,2R_14513567_SNP,2R_14516237_SNP,2R_13576277_SNP,2R_14510558_SNP,2R_14517428_SNP	5.256e-10,6.068e-10,1.458e-09,1.868e-09,3.255e-09,5.093e-09,2.349e-08,2.988e-08,5.489e-08,1.369e-07,1.88e-07,2.582e-07	3R_26320294_SNP,2L_1570489_SNP	3.748e-07,4.016e-07
FBgn0034387	2R	14642500	14644588	+	3R_17296004_SNP(trans-inter-arm),2R_14051582_SNP(trans-intra-arm)			2R_14051582_SNP	1.349e-10	3R_17296004_SNP	5.804e-11
FBgn0034390	2R	14663174	14664483	-	2L_7220279_SNP(trans-inter-arm)					2L_7220279_SNP,2L_7219226_SNP	2.988e-09,2.196e-08
FBgn0034396	2R	14709693	14717204	-	2R_6567140_SNP(trans-intra-arm),2L_11461314_SNP(trans-inter-arm)			2R_6567140_SNP	2.137e-09	2L_11461314_SNP	1.011e-08
FBgn0034399	2R	14722768	14724347	+	2R_14722522_SNP(cis),2R_14723183_SNP(cis)	2R_14722522_SNP,2R_14722542_SNP,2R_14722541_SNP,2R_14723113_SNP,2R_14722590_SNP,2R_14723183_SNP,2R_14723030_SNP,2R_14723123_SNP,2R_14723081_INS,2R_14724147_SNP,2R_14722440_SNP,2R_14724066_SNP,2R_14722692_SNP	2.036e-19,2.611e-17,8.751e-17,1.319e-16,1.43e-16,4.692e-16,7.828e-15,1.365e-14,2.376e-12,5.049e-11,1.59e-10,1.116e-09,2.316e-08	2R_14721509_SNP,2R_14727007_SNP,2R_14727028_SNP,2R_14727031_SNP,2R_14726932_SNP,2R_14726767_SNP,2R_14726881_SNP,2R_14720359_SNP	1.782e-18,4.446e-14,1.382e-12,2.044e-12,2.074e-12,5.621e-12,1.437e-11,4.362e-11
FBgn0034422	2R	15114849	15116118	+	2R_15114883_SNP(cis)	2R_15114884_SNP,2R_15114883_SNP,2R_15114124_SNP,2R_15114071_SNP	2.312e-19,2.957e-19,7.161e-09,1.771e-08	2R_15113706_SNP,2R_15113746_SNP,2R_15113710_DEL,2R_15113705_SNP	6.532e-08,9.445e-08,1.159e-07,2.443e-07
FBgn0034432	2R	15192677	15194950	+	2R_15192755_SNP(cis)	2R_15192755_SNP	3.325e-09
FBgn0034439	2R	15262818	15267679	+	2R_15264578_SNP(trans-intra-arm)			2R_15264578_SNP,2R_15264454_SNP,2R_15264435_SNP,2R_15264457_SNP	5.381e-11,4.941e-09,1.745e-08,1.929e-08
FBgn0034468	2R	15585228	15586013	+	3R_27080083_SNP(trans-inter-arm)					3R_27080083_SNP	2.94e-10
FBgn0034470	2R	15590429	15591420	-	2R_15591343_SNP(cis),2R_15591953_SNP(cis)	2R_15591343_SNP,2R_15591953_SNP,2R_15592065_SNP,2R_15591180_SNP,2R_15591340_SNP,2R_15592011_SNP,2R_15591208_SNP,2R_15592012_SNP,2R_15591923_SNP,2R_15592052_SNP,2R_15591183_SNP,2R_15591193_SNP,2R_15592083_SNP,2R_15591457_SNP,2R_15591220_SNP,2R_15590709_DEL,2R_15591729_SNP,2R_15591974_DEL,2R_15592020_SNP,2R_15592272_SNP,2R_15592053_INS,2R_15592066_SNP	5.261e-17,4.83e-15,3.143e-14,4.664e-14,5.987e-14,1.951e-13,2.341e-13,2.407e-13,2.592e-13,5.308e-13,2.185e-12,2.782e-12,6.656e-12,3.074e-10,6.493e-10,8.116e-10,8.934e-10,2.205e-09,7.095e-08,1.964e-07,3.035e-07,5.925e-07	2R_15589331_SNP,2R_13373149_SNP	4.213e-08,5.915e-07
FBgn0034484	2R	16119334	16122432	+	2R_16119987_SNP(cis),2R_16122322_SNP(cis)	2R_16119990_SNP,2R_16119987_SNP,2R_16119993_SNP,2R_16119667_SNP,2R_16119785_SNP,2R_16120290_SNP,2R_16120170_SNP,2R_16118956_SNP,2R_16121882_SNP,2R_16120239_SNP,2R_16121904_SNP,2R_16121877_SNP,2R_16120289_SNP,2R_16122035_SNP,2R_16121990_SNP,2R_16122695_SNP,2R_16121976_SNP,2R_16120043_INS,2R_16122687_SNP,2R_16122368_SNP,2R_16122322_SNP,2R_16121966_SNP,2R_16122649_SNP,2R_16122396_SNP,2R_16122292_SNP…	4.757e-21,4.858e-21,4.228e-20,3.028e-19,8.779e-19,1.215e-18,7.783e-18,1.952e-17,3.233e-17,4.461e-17,4.709e-17,7.051e-17,8.967e-17,2.727e-16,3.104e-16,1.675e-15,2.879e-15,9.965e-15,1.207e-14,1.351e-14,1.696e-14,4.139e-14,6.741e-14,1.255e-13,2.264e-13,6.595e-13,7.198e-13,7.545e-13,5.75e-12,7.726e-12,8.45e-12,1.047e-11,1.074e-11,2.181e-11,3.565e-11,7.879e-11,8.276e-11,1.106e-10,1.642e-10,2.073e-10,2…	2R_16120451_SNP,2R_16120524_DEL,2R_16120402_SNP,2R_16120488_SNP,2R_16120499_SNP,2R_16121018_SNP,2R_16120992_SNP,2R_16121015_SNP,2R_16116888_SNP,2R_16123630_SNP,2R_16121158_SNP,2R_16123578_SNP,2R_16125118_SNP,2R_16123460_DEL,2R_16125178_SNP,2R_16125184_SNP,2R_16123444_INS,2R_16123446_INS,2R_16117769_DEL,2R_16117737_SNP,2R_16123518_SNP,2R_16123454_SNP,2R_16117693_DEL,2R_16124997_SNP,2R_2984105_SNP,…	4.543e-18,1.007e-17,1.478e-17,3.93e-17,8.876e-15,1.843e-11,4.599e-11,5.562e-11,7.507e-10,1.104e-09,2.091e-09,2.413e-09,3.962e-09,1.532e-08,1.873e-08,2.579e-08,2.826e-08,4.842e-08,8.595e-08,1.028e-07,1.307e-07,2.042e-07,2.319e-07,2.336e-07,4.598e-07,4.68e-07,5.134e-07,5.629e-07,7.733e-07,8.159e-07,9.181e-07,9.706e-07,1.168e-06,1.197e-06,1.239e-06,1.409e-06
FBgn0034485	2R	16123740	16126705	+	2R_16123630_SNP(cis)	2R_16123630_SNP,2R_16123208_SNP,2R_16123518_SNP,2R_16122799_SNP,2R_16123152_SNP,2R_16122793_INS,2R_16122803_INS,2R_16122797_SNP	8.066e-16,8.326e-11,8.549e-10,1.713e-09,2.334e-09,6.037e-09,6.074e-09,5.247e-08	2R_16122472_SNP,2R_16122689_SNP,2R_16121158_SNP,2R_16124819_SNP,2R_16122560_SNP,2R_16120170_SNP,2R_16122589_SNP,2R_16124759_SNP,2R_16116888_SNP,2R_16122322_SNP	1.116e-09,1.215e-09,3.434e-09,3.604e-09,2.543e-08,4.79e-08,1.445e-07,1.447e-07,1.698e-07,1.82e-07	3R_6918386_SNP	9.051e-08
FBgn0034491	2R	16145155	16149231	+	2R_16149015_SNP(cis)	2R_16149030_SNP,2R_16149015_SNP	4.814e-10,6.487e-10
FBgn0034493	2R	16152425	16158499	+	2R_16153485_SNP(trans-intra-arm),2R_16154178_SNP(trans-intra-arm)			2R_16153485_SNP,2R_16153515_SNP,2R_16154178_SNP,2R_16154180_SNP,2R_16153449_SNP,2R_16153431_SNP,2R_16154701_SNP,2R_16154761_SNP,2R_16153971_SNP	1.263e-14,2.424e-14,1.716e-11,3.22e-11,3.536e-10,4.566e-10,9.429e-09,9.888e-09,1.869e-08
FBgn0034500	2R	16192022	16196176	-	2R_7948437_DEL(trans-intra-arm)			2R_7948437_DEL	1.825e-08
FBgn0034530	2R	16515691	16521011	-	2R_16515879_SNP(cis)	2R_16515879_SNP	3.806e-10
FBgn0034534	2R	16528481	16529173	+	2R_16528465_SNP(cis)	2R_16528465_SNP,2R_16528494_SNP,2R_16528206_SNP,2R_16528295_SNP,2R_16528534_SNP,2R_16527691_SNP,2R_16527754_SNP,2R_16528189_SNP,2R_16528562_SNP,2R_16528156_DEL,2R_16529889_SNP	2.833e-20,1.758e-19,6.596e-18,1.301e-17,3.275e-17,3.286e-13,1.109e-11,1.601e-11,2.843e-10,1.783e-08,9.852e-08	2R_16527220_SNP,2R_16527239_SNP,2R_16527256_SNP,2R_16527292_SNP,2R_16531623_SNP,2R_16532155_SNP,2R_16531622_SNP	2.177e-15,2.919e-15,3.369e-14,3.049e-09,7.622e-08,7.966e-08,2.101e-07
FBgn0034537	2R	16531541	16533370	+	2R_16533075_SNP(cis)	2R_16533075_SNP,2R_16533115_SNP,2R_16532155_SNP,2R_16533098_SNP,2R_16531623_SNP,2R_16534116_SNP,2R_16531622_SNP,2R_16532713_SNP,2R_16531522_DEL,2R_16533358_INS,2R_16533003_SNP	1.968e-29,4.738e-21,7.082e-19,7.609e-18,7.684e-17,4.769e-12,2.592e-11,3.497e-10,6.13e-10,2.438e-09,1.038e-08	2R_16529889_SNP,2R_16529978_SNP,2R_16528156_DEL,2R_16530532_SNP,2R_16534711_SNP,2R_16521530_SNP,2R_16529496_SNP,2R_16534733_SNP,2R_16527754_SNP,2R_4486707_SNP,2R_16521257_SNP	3.769e-18,7.287e-16,1.222e-14,7.584e-14,4.854e-13,1.914e-10,1.66e-09,7.721e-09,1.432e-08,3.783e-08,4.596e-08
FBgn0034570	2R	16883725	16895245	+	2R_16893708_SNP(trans-intra-arm)			2R_16893708_SNP	2.907e-12
FBgn0034577	2R	16945292	16947388	+	2R_16946326_SNP(trans-intra-arm)	2R_16945040_SNP,2R_16945733_SNP	3.117e-08,3.95e-08	2R_16946326_SNP,2R_16942911_SNP	4.145e-09,1.864e-08
FBgn0034579	2R	16948294	16949092	+	2R_16948876_SNP(cis)	2R_16948876_SNP,2R_16948672_SNP	2.381e-09,2.948e-09
FBgn0034599	2R	17056435	17057515	+	2R_17056850_SNP(cis)	2R_17056850_SNP,2R_17057125_SNP,2R_17057080_SNP,2R_17057084_SNP,2R_17056912_SNP,2R_17056342_SNP,2R_17057140_SNP,2R_17056213_SNP,2R_17056228_SNP,2R_17056255_SNP,2R_17056340_SNP,2R_17056229_SNP,2R_17056267_SNP,2R_17056295_SNP,2R_17056297_SNP,2R_17057339_SNP,2R_17056329_SNP,2R_17057432_SNP,2R_17056320_SNP,2R_17056323_SNP,2R_17056139_SNP,2R_17057520_SNP,2R_17055993_SNP,2R_17058389_SNP,2R_17057260_SNP…	1.079e-10,1.784e-10,2.351e-10,3.837e-10,4.622e-10,5.662e-10,6.137e-10,6.432e-10,6.432e-10,6.534e-10,6.828e-10,8.055e-10,8.121e-10,8.905e-10,2.162e-09,3.237e-09,4.319e-09,8.141e-09,1.262e-08,1.347e-08,3.783e-08,4.897e-08,1.23e-07,3.784e-07,5.434e-07,6.815e-07	2R_17058615_SNP	1.45e-07
FBgn0034605	2R	17102940	17105284	-	2R_17105172_INS(cis)	2R_17105172_INS,2R_17105137_SNP,2R_17104840_SNP,2R_17105013_SNP,2R_17105080_SNP,2R_17105035_SNP,2R_17105037_SNP,2R_17104979_SNP,2R_17104990_SNP,2R_17104978_SNP,2R_17105632_SNP	1.895e-17,3.477e-15,7.926e-14,1.501e-13,2.13e-13,9.607e-13,1.083e-12,7.65e-12,8.265e-12,1.491e-11,1.123e-10
FBgn0034627	2R	17272057	17273726	-	2R_17271922_SNP(cis),2R_17261934_SNP(trans-intra-arm)	2R_17271922_SNP	7.976e-09	2R_17261934_SNP	7.348e-08
FBgn0034628	2R	17273814	17276781	+	2R_17275843_SNP(cis),2R_17277962_SNP(trans-intra-arm)	2R_17275851_SNP,2R_17275843_SNP,2R_17277546_SNP,2R_17277661_SNP,2R_17277270_SNP,2R_17277565_SNP,2R_17277429_SNP,2R_17277030_SNP,2R_17277035_SNP,2R_17276501_SNP,2R_17276707_SNP,2R_17277393_DEL,2R_17277417_SNP,2R_17277418_SNP,2R_17277388_SNP,2R_17273688_SNP,2R_17277078_SNP,2R_17277376_SNP,2R_17277424_SNP,2R_17277442_SNP,2R_17277443_SNP,2R_17277457_SNP,2R_17273682_DEL,2R_17276932_SNP,2R_17277012_SNP…	3.525e-17,4.942e-17,9.837e-14,3.239e-13,6.34e-13,5.943e-12,8.169e-12,4.696e-10,8.851e-10,1.211e-09,2.848e-09,4.997e-09,4.997e-09,4.997e-09,6.968e-09,7.726e-09,9.689e-09,1.133e-08,2.307e-08,3.838e-08,3.838e-08,4.303e-08,6.52e-08,6.545e-08,7.517e-08,2.405e-07,2.784e-07	2R_17277983_SNP,2R_17275551_SNP,2R_17277962_SNP,2R_17275301_SNP	1.956e-11,4.184e-10,3.329e-09,1.672e-07
FBgn0034629	2R	17276910	17279944	+	2R_17813426_SNP(trans-intra-arm),2R_16505117_SNP(trans-intra-arm)			2R_17813426_SNP,2R_16505117_SNP,2R_18595271_SNP	3.192e-15,1.037e-14,4.225e-12
FBgn0034645	2R	17545583	17546282	+	2R_17545775_SNP(cis)	2R_17546924_SNP,2R_17545775_SNP,2R_17545828_SNP,2R_17545576_SNP,2R_17545556_SNP,2R_17545559_SNP,2R_17545568_SNP,2R_17545583_SNP,2R_17545754_SNP,2R_17545626_SNP,2R_17544639_SNP,2R_17545483_SNP	1.15e-23,1.438e-23,1.438e-23,8.526e-20,5.977e-19,5.977e-19,5.977e-19,5.977e-19,5.977e-19,6.859e-19,1.969e-13,4.407e-10	2R_17547618_INS,2R_17543727_SNP,2R_17543094_SNP,2R_17541739_SNP,2R_17548556_SNP,2R_17542759_SNP,2R_17548040_SNP,2R_17544137_SNP,2R_17543863_SNP,2R_17541905_SNP,2R_17551378_SNP,2R_17543418_SNP,2R_17550085_SNP,2R_17551316_SNP	8.814e-24,7.053e-16,9.539e-16,9.605e-16,9.438e-15,2.411e-14,2.945e-13,4.754e-13,7.321e-13,2.521e-11,4.165e-10,4.428e-10,8.72e-09,2.3e-08
FBgn0034646	2R	17546275	17547512	-	2R_17547618_INS(cis),3R_22628998_SNP(trans-inter-arm)	2R_17545775_SNP,2R_17545828_SNP,2R_17546924_SNP,2R_17547618_INS,2R_17545556_SNP,2R_17545559_SNP,2R_17545568_SNP,2R_17545583_SNP,2R_17545754_SNP,2R_17545626_SNP,2R_17545576_SNP,2R_17548040_SNP	1.959e-17,1.959e-17,2.216e-17,3.381e-17,7.664e-15,7.664e-15,7.664e-15,7.664e-15,7.664e-15,9.348e-15,1.249e-13,4.003e-11	2R_17543727_SNP,2R_17541739_SNP,2R_17543094_SNP,2R_17542759_SNP,2R_17544137_SNP,2R_17543863_SNP,2R_17544639_SNP,2R_17548556_SNP,2R_17541905_SNP,2R_17550085_SNP,2R_17551378_SNP,2R_17549467_SNP,2R_18597005_SNP,2R_17540974_SNP	2.009e-15,2.092e-15,4.423e-15,5.748e-14,2.755e-13,1.912e-12,2.328e-12,7.454e-12,2.765e-11,9.03e-09,1.133e-08,1.843e-08,3.013e-08,6.337e-08	3R_22628998_SNP	2.318e-08
FBgn0034654	2R	17572788	17573706	+	2R_17572772_SNP(cis)	2R_17572772_SNP,2R_17572455_SNP,2R_17572588_SNP,2R_17572629_SNP,2R_17572634_SNP,2R_17572481_SNP	6.969e-17,1.309e-09,1.761e-09,1.194e-08,1.963e-08,1.111e-07
FBgn0034657	2R	17608000	17611560	+	2R_17615692_SNP(trans-intra-arm)			2R_17615692_SNP,2R_17615683_SNP	2.785e-09,5.804e-09
FBgn0034663	2R	17721735	17722552	-	2R_17722719_SNP(cis)	2R_17722719_SNP,2R_17722800_SNP,2R_17722676_SNP,2R_17721537_SNP,2R_17721491_DEL	6.637e-11,4.575e-10,5.831e-09,7.004e-08,1.68e-07	2R_17717131_SNP,2R_17717134_SNP,2R_17717126_SNP,2R_17717029_SNP,2R_17718979_SNP,2R_17716663_SNP,2R_17717011_SNP,2R_17720656_SNP,2R_17717264_SNP,2R_17717967_SNP,2R_17720615_SNP,2R_17719138_SNP,2R_17720619_SNP	5.432e-10,1.036e-09,1.938e-09,2.309e-09,1.865e-08,2.159e-08,3.397e-08,3.589e-08,5.91e-08,1.834e-07,2.935e-07,2.962e-07,3.418e-07
FBgn0034687	2R	17957230	17958791	-	2R_17958714_SNP(cis),2R_17958864_SNP(cis)	2R_17958698_SNP,2R_17958714_SNP,2R_17958430_SNP,2R_17958339_SNP,2R_17958864_SNP	7.265e-16,2.621e-14,1.175e-09,4.859e-09,8.536e-09
FBgn0034689	2R	17961043	17962813	-	2R_18391563_SNP(trans-intra-arm),2R_9218083_SNP(trans-intra-arm),2R_17662778_SNP(trans-intra-arm)			2R_18391563_SNP,2R_17662778_SNP,2R_9218083_SNP,2R_16670152_SNP,2R_16827516_SNP,2R_10514820_SNP	4.14e-14,1.74e-13,9.571e-13,2.307e-12,7.331e-12,1.493e-11	2L_1533173_SNP	7.175e-12
FBgn0034706	2R	18067200	18070147	+	2R_18067273_SNP(cis),2R_18075026_SNP(trans-intra-arm)	2R_18067273_SNP,2R_18067184_SNP,2R_18067307_SNP,2R_18067260_SNP,2R_18067160_INS,2R_18069647_SNP,2R_18069621_SNP,2R_18070432_SNP,2R_18067283_INS,2R_18067333_SNP,2R_18066281_SNP,2R_18066452_SNP,2R_18066265_SNP,2R_18066280_SNP,2R_18070766_SNP,2R_18067814_DEL,2R_18070961_SNP,2R_18070606_SNP,2R_18070790_SNP,2R_18070562_SNP,2R_18070418_SNP,2R_18067436_SNP,2R_18070367_SNP,2R_18066287_SNP,2R_18069854_SNP…	2.401e-20,4.705e-18,1.526e-17,3.022e-16,6.651e-15,1.35e-14,1.801e-14,2.809e-14,2.436e-13,1.064e-12,1.938e-11,2.765e-11,3.318e-11,4.51e-11,9.928e-11,1.921e-10,2.154e-10,2.255e-10,3.076e-10,6.206e-10,6.543e-10,1.038e-09,1.39e-09,2.122e-09,1.626e-08,4.633e-08,1.753e-07,2.466e-07,4.138e-07,1.029e-06,2.142e-06,2.438e-06	2R_18075026_SNP,2R_18075657_SNP,2R_18076080_SNP,2R_18076804_SNP,2R_18076011_SNP,2R_18076023_SNP,2R_18068493_SNP,2R_18075034_SNP,2R_18068320_SNP,2R_18065702_SNP,2R_18075711_SNP,2R_18068395_SNP,2R_18068289_SNP,2R_18068464_SNP,2R_18068810_SNP,2R_18069143_SNP,2R_18072035_SNP,2R_18068460_SNP,2R_18077002_DEL,2R_18074244_SNP,2R_18072045_SNP,2R_18071825_SNP,2R_18072776_SNP,2R_18077494_SNP,2R_18060467_SNP…	5.918e-16,3.11e-15,7.155e-15,9.514e-15,1.149e-14,2.208e-14,2.857e-14,9.362e-14,1.564e-13,1.621e-13,1.879e-13,2.538e-13,4.62e-13,9.082e-13,1.103e-12,1.169e-12,1.808e-12,1.839e-12,1.873e-12,1.933e-12,2.119e-12,1.058e-11,1.792e-11,5.926e-11,8.051e-11,8.581e-11,1.18e-10,1.597e-10,1.688e-10,5.206e-10,5.833e-10,9.215e-10,1.218e-09,2.911e-09,1.782e-08,1.784e-08,1.972e-08,3.382e-08,3.773e-08,9.302e-08,1.…	3L_16075365_SNP	3.165e-07
FBgn0034723	2R	18270639	18281520	+	2R_18280536_SNP(cis)	2R_18280536_SNP,2R_18281046_SNP,2R_18282355_SNP,2R_18282402_SNP,2R_18282142_SNP,2R_18280617_INS,2R_18282100_SNP	5.929e-15,2.761e-09,3.223e-09,4.148e-08,6.765e-08,1.407e-07,5.6e-07	2R_18278141_SNP,2R_18285098_SNP,2R_18278091_SNP,2R_18278772_SNP,2R_18278015_SNP,2R_18278025_SNP,2R_18279892_SNP,2R_18277497_SNP,2R_18278767_SNP,2R_18279809_SNP,2R_18277501_SNP,2R_18277491_SNP,2R_18278764_SNP,2R_18279287_SNP,2R_18277486_SNP,2R_18278806_SNP,2R_18273170_SNP	3.672e-10,5.672e-10,4.39e-09,5.943e-09,7.754e-09,1.223e-08,3.218e-08,4.26e-08,5.199e-08,5.236e-08,5.506e-08,5.851e-08,7.029e-08,7.534e-08,7.661e-08,2.056e-07,4.247e-07
FBgn0034728	2R	18308518	18312987	+	2R_18307556_SNP(cis)	2R_18307556_SNP,2R_18307766_SNP,2R_18307547_SNP,2R_18308547_SNP,2R_18308145_SNP,2R_18308204_SNP,2R_18308269_SNP,2R_18308492_SNP,2R_18308831_SNP,2R_18308351_SNP,2R_18308436_SNP	4.817e-11,7.987e-11,1.236e-10,2.313e-10,6.011e-10,1.369e-09,3.039e-09,3.713e-09,4.907e-09,2.708e-08,5.579e-07	2R_18310112_SNP,2R_18309620_SNP,2R_18309920_SNP,2R_18309554_SNP,2R_18311236_SNP,2R_18311795_SNP	1.32e-09,6.321e-08,7.513e-08,1.199e-07,2.002e-07,4.256e-07	2L_10106737_SNP	2.087e-07
FBgn0034731	2R	18342246	18360500	+	2R_18342260_SNP(cis)	2R_18342260_SNP,2R_18342132_SNP,2R_18341971_SNP	2.51e-15,1.819e-08,2.717e-08
FBgn0034734	2R	18370808	18379538	+	2R_18370874_SNP(cis)	2R_18370874_SNP	1.621e-10
FBgn0034735	2R	18379702	18381800	+	2R_18380653_SNP(cis)	2R_18380653_SNP,2R_18380515_SNP,2R_18380695_SNP,2R_18379086_SNP,2R_18381027_SNP,2R_18379036_SNP,2R_18381716_SNP	1.702e-20,9.784e-20,1.96e-18,7.684e-09,2.381e-08,5.657e-08,8.671e-08	2R_18377325_SNP,2R_18375764_SNP,2R_18380737_SNP	1.023e-07,2.012e-07,2.023e-07
FBgn0034736	2R	18437599	18439618	+	2R_18437650_SNP(cis)	2R_18437650_SNP	3.708e-11
FBgn0034742	2R	18487910	18493172	-	2R_18493200_SNP(cis)	2R_18493200_SNP,2R_18492958_SNP,2R_18493073_SNP	8.393e-09,1.561e-08,3.486e-08	2R_18489963_SNP,2R_18489957_SNP	2.221e-08,7.721e-08
FBgn0034744	2R	18495815	18496924	+	3L_10261564_SNP(trans-inter-arm)					3L_10261564_SNP	6.125e-09
FBgn0034748	2R	18521524	18523447	-	2R_18526279_SNP(trans-intra-arm)			2R_18526279_SNP	6.949e-11
FBgn0034761	2R	18551197	18551979	+	2R_18551246_SNP(cis)	2R_18551249_SNP,2R_18551246_SNP,2R_18551255_SNP,2R_18551247_SNP,2R_18551253_SNP,2R_18551257_DEL,2R_18550865_SNP,2R_18550664_SNP,2R_18550513_SNP,2R_18550714_SNP,2R_18552221_SNP,2R_18550662_SNP,2R_18551143_SNP,2R_18551849_SNP,2R_18551811_SNP,2R_18551558_SNP	1.34e-28,2.405e-28,4.341e-28,1.478e-27,6.48e-27,6.289e-25,2.302e-18,1.367e-16,2.706e-13,1.501e-11,5.797e-11,6.831e-11,1.594e-09,5.16e-09,9.247e-09,3.061e-08	2R_18550093_SNP,2R_18546814_SNP,2R_18553007_SNP,2R_18553650_SNP,2R_18553634_SNP,2R_18553652_SNP,2R_18553128_SNP,2R_18553625_SNP,2R_18547594_SNP,2R_18546755_SNP,2R_18546767_SNP,2R_18547650_SNP,2R_18555031_SNP,2R_18556728_SNP,2R_18554501_SNP,2R_18546290_SNP,2R_18556931_SNP,2R_18554422_SNP,2R_18545025_SNP	2.413e-12,2.478e-11,5.552e-10,2.273e-09,2.765e-09,2.841e-09,7.569e-09,1.134e-08,1.222e-08,3.584e-08,1.093e-07,1.196e-07,1.272e-07,1.361e-07,1.368e-07,1.6e-07,2.569e-07,2.618e-07,2.781e-07	2L_12576131_SNP	2.429e-07
FBgn0034766	2R	18590200	18591291	+	3L_15992704_SNP(trans-inter-arm)					3L_15992704_SNP	1.617e-09
FBgn0034783	2R	18724884	18726814	+	2R_18725678_SNP(cis)	2R_18725678_SNP,2R_18725583_SNP,2R_18725502_SNP,2R_18725504_SNP,2R_18726730_SNP	1.433e-13,3.426e-13,4.277e-12,6.004e-12,7.28e-09	2R_18720658_SNP,2R_18719379_INS,2R_18722216_SNP	1.292e-10,2.674e-09,1.893e-08
FBgn0034788	2R	18758713	18761950	+	2R_18758538_SNP(cis)	2R_18758538_SNP,2R_18758587_SNP,2R_18758579_INS,2R_18758454_SNP,2R_18758243_SNP,2R_18758238_INS,2R_18758249_SNP,2R_18758357_SNP,2R_18758337_SNP	3.197e-33,1.721e-30,2.294e-29,5.352e-22,1.532e-12,1.658e-12,7.794e-12,4.387e-10,7.132e-10	2R_19309564_SNP	3.443e-10
FBgn0034793	2R	18773921	18775101	+	2R_18774146_SNP(cis)	2R_18774146_SNP,2R_18774201_SNP,2R_18773675_SNP,2R_18774942_SNP,2R_18774973_SNP,2R_18774186_SNP,2R_18773041_SNP,2R_18773130_SNP,2R_18774840_SNP,2R_18775200_SNP,2R_18773191_SNP,2R_18775296_SNP,2R_18774924_SNP,2R_18775913_SNP,2R_18774927_SNP,2R_18775775_SNP,2R_18775112_SNP,2R_18775105_INS,2R_18775972_SNP,2R_18775933_SNP,2R_18775936_DEL,2R_18775023_SNP,2R_18775871_SNP,2R_18774335_SNP,2R_18775971_SNP	2.431e-21,1.605e-19,2.281e-18,3.242e-18,8.808e-16,3.341e-15,3.862e-15,1.406e-14,2.317e-14,4.813e-14,5.957e-14,1.825e-13,2.214e-13,2.258e-13,2.895e-13,5.596e-13,6.248e-13,6.574e-13,6.819e-12,1.705e-11,1.834e-11,5.898e-11,1.252e-10,2.024e-10,3.04e-09	2R_18772887_SNP,2R_18772664_SNP,2R_18770892_SNP,2R_18771858_SNP,2R_18771855_SNP,2R_18777351_SNP,2R_18772313_SNP,2R_18772549_SNP,2R_18772545_SNP,2R_18769886_SNP,2R_18772415_SNP,2R_18777412_SNP,2R_18776610_SNP,2R_18778308_SNP,2R_18777779_SNP,2R_18776709_SNP,2R_18776196_SNP,2R_18777240_SNP,2R_18779756_SNP,2R_18776712_SNP,2R_18777408_SNP,2R_18780340_SNP,2R_18782030_SNP,2R_18783424_SNP,2R_18777732_SNP…	1.086e-15,1.517e-15,7.177e-15,5.448e-14,6.611e-14,1.905e-13,3.515e-13,3.709e-13,3.83e-13,3.986e-13,5.291e-13,1.039e-12,1.07e-12,1.43e-12,3.066e-12,3.964e-12,4.209e-12,4.789e-12,6.523e-12,2.334e-11,2.46e-11,3.5e-11,5.179e-11,7.078e-11,8.522e-11,1.061e-10,1.256e-10,1.39e-10,1.707e-10,2.589e-10,3.257e-10,3.865e-10,4.412e-10,5.846e-10,5.983e-10,6.598e-10,8.533e-10,8.831e-10,8.847e-10,1.067e-09,1.253e…	3L_4560527_SNP,3L_7976464_SNP	1.491e-06,2.593e-06
FBgn0034795	2R	18776451	18781948	+	2R_18782673_SNP(cis)	2R_18782673_SNP,2R_18781806_SNP,2R_18782030_SNP,2R_18782307_SNP,2R_18782415_SNP,2R_18782883_SNP,2R_18782375_SNP,2R_18776226_SNP,2R_18781296_SNP,2R_18782935_SNP,2R_18776196_SNP,2R_18775775_SNP,2R_18776523_SNP,2R_18775933_SNP,2R_18777351_SNP,2R_18781999_SNP,2R_18781492_SNP,2R_18781543_SNP,2R_18775972_SNP,2R_18781483_SNP,2R_18781525_SNP,2R_18781772_SNP,2R_18777069_SNP,2R_18777240_SNP,2R_18782263_SNP…	3.087e-11,7.118e-11,9.889e-11,6.852e-10,1.568e-09,8.984e-09,1.754e-08,3.209e-08,4.209e-08,4.465e-08,5.647e-08,6.474e-08,7.052e-08,7.533e-08,7.606e-08,8.039e-08,1.184e-07,1.259e-07,1.455e-07,1.901e-07,1.941e-07,2.349e-07,5.186e-07,6.283e-07,1.006e-06,1.062e-06	2R_18786124_SNP,2R_18780340_SNP,2R_18780217_SNP,2R_18775296_SNP,2R_18786360_SNP,2R_18785997_SNP,2R_18787514_SNP,2R_18783424_SNP,2R_18783294_SNP,2R_18774840_SNP,2R_18787138_SNP,2R_18775200_SNP,2R_18786585_SNP,2R_18777732_SNP,2R_18774973_SNP,2R_18778308_SNP,2R_18786564_SNP,2R_18779756_SNP,2R_18777779_SNP,2R_18774942_SNP,2R_18780203_SNP,2R_18780034_SNP,2R_18778227_SNP,2R_18770892_SNP,2R_18780412_SNP	3.857e-11,8.161e-10,1.093e-09,3.435e-09,4.577e-09,8.995e-09,1.048e-08,1.135e-08,1.249e-08,1.285e-08,1.486e-08,2.106e-08,2.192e-08,8.022e-08,8.575e-08,8.708e-08,8.817e-08,1.037e-07,1.415e-07,1.534e-07,1.706e-07,1.814e-07,1.945e-07,5.675e-07,9.077e-07
FBgn0034800	2R	18819558	18821600	-	2R_18818784_SNP(cis)	2R_18818784_SNP,2R_18821225_SNP,2R_18819015_SNP,2R_18819000_SNP,2R_18818906_SNP,2R_18822564_SNP,2R_18822567_DEL,2R_18822563_SNP,2R_18821444_SNP,2R_18820669_SNP,2R_18819476_SNP,2R_18818948_SNP,2R_18819667_SNP,2R_18819064_SNP,2R_18822487_SNP,2R_18818981_INS,2R_18821241_SNP	2.608e-16,5.569e-16,9.654e-16,1.037e-15,2.573e-15,3.511e-14,3.93e-14,6.754e-14,1.256e-11,2.705e-09,4.632e-08,9.776e-08,2.306e-07,4.044e-07,5.165e-07,5.96e-07,8.992e-07	2R_18825876_SNP,2R_18825933_SNP,2R_18825911_SNP,2R_18823169_INS,2R_18818314_SNP,2R_18817375_SNP,2R_18825243_SNP,2R_18833198_INS,2R_18831759_SNP,2R_18826019_SNP,2R_18826001_SNP,2R_18832496_SNP,2R_18829920_SNP,2R_18823372_INS,2R_18817694_SNP,2R_18823085_SNP,2R_18820589_SNP,2R_18813908_SNP,2R_18818433_SNP,2R_18817658_SNP,2R_18818427_SNP,2R_18824706_SNP,2R_18827470_SNP,2R_18818271_SNP,2R_18828286_SNP…	7.19e-12,1.487e-11,2.836e-11,2.017e-10,3.875e-10,7.546e-10,1.699e-09,1.789e-09,2.17e-09,3.079e-09,3.561e-09,4.504e-09,6.043e-09,1.206e-08,2.928e-08,3.253e-08,4.419e-08,4.727e-08,5.716e-08,6.774e-08,7.238e-08,8.809e-08,9.87e-08,1.529e-07,1.734e-07,1.752e-07,1.848e-07,2.346e-07,2.676e-07,2.889e-07,3.2e-07,3.256e-07,4.038e-07,5.01e-07,5.613e-07,5.956e-07,5.956e-07,6.112e-07,6.255e-07,6.535e-07	3R_22493123_SNP,2L_9350976_SNP,3R_8475189_SNP,3R_21121526_SNP	3.151e-07,4.961e-07,6.574e-07,7.291e-07
FBgn0034808	2R	18881192	18886407	-	2R_18879206_SNP(trans-intra-arm)	2R_18882021_SNP	1.284e-08	2R_18879206_SNP,2R_18874390_SNP,2R_18882747_SNP,2R_18877167_SNP,2R_18884649_SNP	4.231e-10,5.04e-09,1.283e-08,2.361e-08,8.595e-08
FBgn0034814	2R	18950270	18951783	-	2R_18951762_SNP(cis)	2R_18951762_SNP,2R_18951643_SNP,2R_18951756_SNP,2R_18951640_SNP,2R_18951476_SNP,2R_18951984_SNP,2R_18951996_SNP,2R_18951986_SNP,2R_18951455_SNP,2R_18951457_SNP,2R_18951400_SNP,2R_18951704_SNP,2R_18951160_SNP,2R_18950974_SNP,2R_18951181_SNP,2R_18951109_SNP,2R_18951313_SNP,2R_18950938_SNP	1.044e-12,1.168e-11,2.689e-11,1.247e-10,2.683e-10,5.923e-09,6.92e-09,8.816e-09,2.927e-08,3.479e-08,4.5e-08,6.836e-08,7.864e-08,9.042e-08,9.108e-08,1.445e-07,1.921e-07,2.534e-07	2R_20312741_SNP	8.203e-08
FBgn0034816	2R	18962346	18964380	+	2R_18962403_SNP(cis)	2R_18962403_SNP,2R_18962442_DEL,2R_18962514_INS	3.102e-10,1.621e-09,5.182e-09
FBgn0034869	2R	19387174	19388225	+	3R_13357711_SNP(trans-inter-arm)					3R_13357711_SNP,3R_13357807_SNP,3R_13357695_SNP,3R_13355431_SNP,3R_13355575_SNP,3R_13357640_SNP,3R_13357641_SNP,3R_13357643_SNP,3R_13357646_SNP,3R_13357647_SNP,3R_13357631_DEL,3R_13357648_DEL,3R_13356947_SNP,3R_13352042_SNP,3R_13351866_SNP,3R_13356994_SNP,3R_13386183_SNP,3R_13353203_SNP,3R_13353913_DEL	7.079e-12,8.535e-12,8.549e-12,9.969e-12,1.014e-11,1.304e-11,1.304e-11,1.304e-11,1.304e-11,1.304e-11,1.418e-11,1.818e-11,2.071e-11,9.147e-10,1.039e-09,1.498e-09,1.631e-09,5.693e-09,9.755e-09
FBgn0034870	2R	19390469	19391338	+	2R_19390442_SNP(cis)	2R_19390442_SNP	5.794e-09
FBgn0034879	2R	19442541	19443740	-	2R_19443785_SNP(cis),2R_19442673_SNP(cis)	2R_19443785_SNP,2R_19442673_SNP	4.973e-09,8.442e-09
FBgn0034915	2R	19736769	19737824	-	2R_19737551_SNP(cis),2L_14915307_INS(trans-inter-arm),3R_24651652_SNP(trans-inter-arm)	2R_19737551_SNP,2R_19736845_SNP,2R_19738216_SNP,2R_19738553_SNP,2R_19738273_SNP,2R_19738715_SNP,2R_19737545_SNP,2R_19738759_SNP,2R_19737581_SNP,2R_19737692_SNP,2R_19738809_SNP,2R_19738085_SNP,2R_19736108_SNP,2R_19737509_SNP,2R_19737446_SNP,2R_19737473_SNP,2R_19738001_SNP,2R_19736546_SNP,2R_19737996_SNP,2R_19738066_SNP,2R_19736508_SNP,2R_19736632_SNP,2R_19736605_SNP,2R_19736250_SNP,2R_19736477_SNP…	7.313e-18,1.027e-17,7.034e-17,1.209e-16,1.006e-14,2.021e-14,3.398e-14,3.539e-13,8.255e-13,1.009e-12,4.341e-12,7.343e-11,1.462e-10,1.705e-10,2.37e-10,4.386e-10,4.953e-10,1.008e-09,1.428e-09,2.791e-09,4.604e-09,2.074e-08,2.818e-08,1.042e-07,3.443e-07,4.287e-07,1.048e-06	2R_19735454_SNP,2R_19739076_SNP,2R_19735459_INS,2R_19739376_SNP,2R_19739853_SNP,2R_19735428_SNP,2R_19738832_SNP,2R_19738901_SNP,2R_19738939_SNP,2R_19738932_SNP,2R_19738976_SNP,2R_19738914_SNP,2R_19738923_SNP,2R_19738925_SNP,2R_19738904_SNP,2R_19738941_SNP,2R_19738913_SNP,2R_19738847_SNP,2R_19734056_SNP,2R_19738870_SNP,2R_19738885_INS,2R_19735624_SNP,2R_19738969_SNP,2R_19731432_SNP,2R_19729335_SNP…	2.05e-17,5.668e-17,7.019e-17,3.81e-16,3.644e-15,8.626e-15,1.984e-13,2.656e-13,2.659e-13,2.676e-13,3.661e-13,3.954e-13,4.307e-13,4.321e-13,5.61e-13,9.276e-13,9.451e-13,1.007e-12,1.634e-12,4.241e-12,7.316e-12,9.087e-12,1.204e-11,1.243e-11,1.27e-11,1.873e-11,2.837e-11,3.102e-11,4.513e-11,8.061e-11,8.915e-11,3.713e-10,6.123e-10,6.89e-10,6.957e-10,7.243e-10,8.685e-10,3.365e-09,4.515e-09,1.072e-08,3.61…	3R_21315752_SNP,2L_10854901_SNP,2L_10854615_SNP,3L_5299747_SNP,2L_5291731_INS,3R_24651652_SNP,2L_5291614_SNP,2L_5291741_SNP,2L_5291757_SNP,2L_5291985_DEL,2L_5291811_SNP,2L_14915307_INS,2L_5291806_DEL,3L_5299817_DEL,X_18455177_SNP	3.274e-07,3.376e-07,3.396e-07,5.198e-07,7.7e-07,8.66e-07,9.822e-07,1.225e-06,1.251e-06,1.399e-06,1.731e-06,1.849e-06,2.213e-06,2.38e-06,2.604e-06
FBgn0034919	2R	19752937	19754177	+	2L_7955222_SNP(trans-inter-arm)					2L_7955222_SNP	1.498e-08
FBgn0034923	2R	19780589	19782510	-	2R_19781321_SNP(cis)	2R_19781321_SNP,2R_19782327_SNP,2R_19782752_SNP,2R_19782753_SNP,2R_19782733_DEL	4.608e-10,1.142e-09,1.744e-08,2.988e-08,1.554e-07			3R_5442309_DEL,3R_5442343_SNP,3R_5442319_DEL	7.073e-08,1.095e-07,1.446e-07
FBgn0034924	2R	19782586	19784520	+	2R_19782457_SNP(cis)	2R_19782457_SNP,2R_19782442_DEL,2R_19782327_SNP,2R_19782752_SNP,2R_19782753_SNP,2R_19782733_DEL	8.414e-09,1.083e-08,3.235e-08,3.905e-08,6.542e-08,6.914e-08
FBgn0034957	2R	19904944	19907419	+	2R_15924720_DEL(trans-intra-arm)			2R_15924720_DEL	1.751e-10
FBgn0034963	2R	19924243	19925438	-	2R_19925394_SNP(cis),2R_19925441_SNP(cis)	2R_19925394_SNP,2R_19925146_SNP,2R_19925269_SNP,2R_19925566_SNP,2R_19925333_SNP,2R_19925204_SNP,2R_19925580_SNP,2R_19925199_SNP,2R_19925288_SNP,2R_19925068_SNP,2R_19925453_SNP,2R_19924702_SNP,2R_19925457_DEL,2R_19925452_SNP,2R_19924699_SNP,2R_19924703_SNP,2R_19924907_SNP,2R_19925445_MNP,2R_19925437_SNP,2R_19925416_SNP,2R_19925438_SNP,2R_19925441_SNP,2R_19925455_SNP,2R_19924969_SNP,2R_19924960_SNP…	9.569e-14,1.38e-13,1.659e-13,2.684e-13,5.476e-13,7.291e-13,1.312e-12,1.457e-11,2.253e-11,3.235e-11,8.482e-11,1.307e-10,1.324e-10,1.366e-10,1.495e-10,1.495e-10,1.495e-10,1.671e-10,2.123e-10,2.966e-10,3.003e-10,4.452e-10,5.464e-10,9.753e-10,2.929e-09,3.291e-09,4.914e-09,1.992e-07,2.954e-07,3.74e-07,5.068e-07	2R_19928147_SNP,2R_19912930_SNP	1.44e-08,6.164e-07
FBgn0034964	2R	19925466	19931981	+	2R_19929971_SNP(trans-intra-arm)			2R_19929971_SNP	4.537e-10
FBgn0034965	2R	19940440	19944660	-	2R_6676113_SNP(trans-intra-arm)			2R_6675855_SNP,2R_6676113_SNP	2.043e-08,2.311e-08
FBgn0034975	2R	19986733	19994555	+	2R_19994018_SNP(cis)	2R_19994018_SNP,2R_19993988_SNP,2R_19994001_SNP,2R_19994229_SNP	1.659e-11,5.965e-10,6.336e-10,9.955e-08	2R_19990438_SNP,2R_19990351_SNP	5.151e-09,1.333e-07
FBgn0034986	2R	20061188	20061964	-	2R_20075394_SNP(trans-intra-arm),2L_10514433_SNP(trans-inter-arm)	2R_20061217_SNP,2R_20061220_SNP,2R_20061213_SNP,2R_20061195_SNP,2R_20060982_SNP,2R_20060206_SNP,2R_20060233_SNP,2R_20061013_SNP,2R_20060624_SNP,2R_20060987_SNP,2R_20061659_SNP,2R_20060543_SNP,2R_20061152_SNP,2R_20061231_SNP,2R_20060191_SNP,2R_20061470_SNP,2R_20061937_SNP,2R_20060937_SNP,2R_20060483_SNP,2R_20062223_INS,2R_20062600_SNP,2R_20062281_SNP,2R_20062283_SNP,2R_20062005_SNP,2R_20062139_SNP…	1.808e-11,3.355e-11,4.93e-11,5.025e-11,7.472e-10,8.686e-10,8.781e-10,1.013e-09,1.166e-09,1.288e-09,2.581e-09,5.501e-09,4.846e-08,4.905e-08,4.93e-08,2.657e-07,3.241e-07,3.603e-07,4.505e-07,9.471e-07,1.198e-06,1.606e-06,1.606e-06,1.662e-06,1.805e-06,1.858e-06	2R_20075499_SNP,2R_20075415_SNP,2R_20075437_SNP,2R_20075486_SNP,2R_20075394_SNP,2R_20075452_SNP,2R_20075502_SNP,2R_20075436_SNP,2R_20060171_SNP,2R_20060134_SNP,2R_20059467_SNP,2R_20059698_SNP,2R_20059660_SNP,2R_20073932_SNP,2R_20078648_SNP,2R_20072333_SNP,2R_20059731_SNP,2R_20059455_SNP,2R_20073344_SNP,2R_20072295_SNP,2R_20075024_SNP,2R_20086561_SNP,2R_20073503_SNP,2R_20074337_SNP,2R_20063905_SNP…	1.056e-11,1.619e-11,3.072e-11,3.269e-11,3.448e-11,3.616e-11,6.978e-11,9.244e-11,1.783e-10,4.524e-10,3.675e-09,6.913e-09,9.059e-09,1.826e-08,2.258e-08,2.28e-08,2.649e-08,3.453e-08,6.375e-08,1.093e-07,1.186e-07,1.559e-07,2.227e-07,2.292e-07,2.89e-07,2.908e-07,3.969e-07,4.166e-07,4.695e-07,4.974e-07,5.543e-07,5.74e-07,5.829e-07,6.647e-07,6.651e-07,7.19e-07,1.089e-06,1.738e-06,1.784e-06	3L_437534_SNP,2L_10514433_SNP,2L_10514335_SNP	4.42e-07,1.524e-06,1.548e-06
FBgn0034997	2R	20145536	20152736	+	X_7989145_SNP(trans-inter-arm)					X_7989145_SNP	1.11e-11
FBgn0034999	2R	20181620	20185634	+	3L_8370063_DEL(trans-inter-arm)					3L_8370063_DEL	4.35e-11
FBgn0035006	2R	20338607	20340563	-	2R_20340928_SNP(cis)	2R_20340928_SNP	1.492e-09
FBgn0035035	2R	20491095	20492193	+	2R_20491436_SNP(cis),2R_20494095_SNP(trans-intra-arm)	2R_20491436_SNP,2R_20491577_SNP,2R_20491919_SNP,2R_20491937_SNP,2R_20491301_SNP,2R_20491098_DEL,2R_20491046_SNP,2R_20490354_SNP,2R_20491313_SNP	7.042e-24,2.923e-16,9.03e-14,3.138e-13,6.712e-11,2.386e-10,5.079e-10,2.159e-09,8.685e-09	2R_20494095_SNP,2R_20493570_SNP,2R_20496870_SNP,2R_20494401_SNP,2R_20495035_SNP,2R_20493796_SNP,2R_20493763_SNP,2R_20493537_SNP,2R_20496871_SNP,2R_20496791_SNP,2R_20495800_DEL,2R_20499578_SNP,2R_20497074_SNP,2R_20505845_SNP,2R_20503929_SNP,2R_20504274_SNP,2R_20496424_SNP,2R_20505122_SNP,2R_20505486_INS,2R_20505599_SNP,2R_20489173_SNP,2R_20496324_SNP,2R_20489149_SNP,2R_20486458_SNP,2R_20502377_SNP	2.502e-17,2.968e-17,2.118e-16,2.134e-16,4.768e-15,8.78e-15,2.107e-14,1.408e-12,4.638e-11,5.494e-11,2.425e-10,3.643e-10,8.682e-10,4.623e-09,1.415e-08,2e-08,5.605e-08,5.697e-08,1.571e-07,1.71e-07,1.916e-07,2.991e-07,3.238e-07,4.702e-07,4.987e-07	3R_2637563_SNP	4.448e-07
FBgn0035065	2R	20671078	20673065	+	2R_20682842_SNP(trans-intra-arm)	2R_20671699_SNP,2R_20673616_SNP,2R_20673963_SNP,2R_20671656_SNP,2R_20672829_DEL	2.495e-17,1.326e-15,6.17e-11,2.568e-09,5.339e-09	2R_20682842_SNP,2R_20697826_SNP,2R_20703225_SNP,2R_20698085_SNP,2R_20699976_SNP,2R_20680707_SNP,2R_20697989_DEL,2R_20684993_SNP,2R_20702693_SNP,2R_20662416_SNP,2R_20701365_SNP,2R_20681405_SNP,2R_20703436_SNP,2R_20712171_INS,2R_20698597_SNP,2R_20704451_SNP,2R_20681411_SNP,2R_20700335_SNP,2R_20704605_SNP,2R_20662196_SNP,2R_20700322_SNP,2R_20700416_SNP,2R_20700303_DEL,2R_20696832_INS,2R_20684884_SNP…	6.77e-30,1.443e-29,4.505e-28,8.311e-28,1.712e-26,6.307e-25,3.095e-23,1.846e-22,7.76e-22,7.911e-22,1.062e-21,1.607e-21,1.891e-21,1.215e-20,1.669e-20,3.326e-20,3.946e-20,4.416e-20,2.472e-19,2.307e-18,2.628e-18,3.559e-18,4.65e-18,4.835e-18,5.991e-18,1.347e-17,3.19e-17,1.48e-16,1.856e-16,2.941e-16,3.504e-16,7.345e-16,8.953e-16,1.186e-15,4.518e-15,5.278e-15,6.09e-15,8.795e-15,1.169e-14,1.38e-14,1.66e-…	3R_22373967_DEL,3L_4199100_SNP,3L_8547358_SNP,3R_9689633_SNP,2L_6971145_SNP,2L_7449210_SNP,3L_4190342_SNP,3L_4194005_SNP,3L_4194934_SNP,3L_4197106_SNP,3L_4198877_SNP,3L_4194114_SNP,3L_4197120_SNP,X_16256788_SNP	1.278e-07,6.539e-07,6.59e-07,1.289e-06,1.5e-06,2.505e-06,2.744e-06,2.744e-06,2.744e-06,2.744e-06,2.744e-06,3.02e-06,4.284e-06,4.339e-06
FBgn0035073	2R	20758930	20762435	-	2R_20889674_DEL(trans-intra-arm),3L_10249551_SNP(trans-inter-arm),2L_19127139_SNP(trans-inter-arm),2R_20762444_SNP(cis)	2R_20762444_SNP,2R_20758401_SNP,2R_20758602_SNP,2R_20761662_INS	1.5e-10,3.517e-08,1.349e-07,4.892e-07	2R_20889674_DEL,2R_20899540_SNP,2R_20896997_SNP,2R_20901092_SNP,2R_20890965_SNP,2R_20895947_SNP,2R_20774480_SNP,2R_20895704_INS,2R_20905373_SNP,2R_20896070_SNP,2R_20922090_SNP,2R_20898805_SNP,2R_20768854_SNP,2R_20971914_SNP,2R_20906220_SNP,2R_20892691_SNP,2R_20771926_SNP,2R_20765172_SNP,2R_20899708_INS,2R_20917940_SNP,2R_20917124_SNP,2R_20915257_SNP,2R_20972746_SNP,2R_20768944_SNP,2R_21005893_SNP…	1.593e-11,1.846e-11,5.727e-11,1.441e-10,1.491e-10,2.551e-10,4.136e-10,4.244e-10,5.771e-10,5.908e-10,5.978e-10,6.77e-10,8.647e-10,1.629e-09,1.95e-09,2.009e-09,2.027e-09,2.291e-09,2.324e-09,2.394e-09,3.084e-09,3.247e-09,3.313e-09,4.343e-09,5.232e-09,5.832e-09,6.278e-09,8.392e-09,8.546e-09,1.006e-08,1.057e-08,1.271e-08,1.476e-08,1.55e-08,1.701e-08,1.81e-08,1.972e-08,2.615e-08,2.847e-08,3.446e-08,3.4…	3L_10249551_SNP,X_1657267_SNP,2L_19127159_SNP,2L_19127139_SNP,3L_5962907_SNP	5.226e-09,2.336e-07,9.53e-07,9.544e-07,1.919e-06
FBgn0035078	2R	20785425	20788257	-	X_6568154_SNP(trans-inter-arm)					X_6568154_SNP,X_6568163_SNP,X_6568127_SNP,X_6568138_SNP	9.545e-13,1.463e-12,1.947e-12,2.451e-12
FBgn0035082	2R	20827229	20828006	-	2R_1179114_SNP(trans-intra-arm)			2R_1179114_SNP	2.311e-10
FBgn0035131	3L	329822	332309	-	3L_332510_SNP(cis),3L_331436_SNP(cis),X_13368468_SNP(trans-inter-arm)	3L_332513_SNP,3L_332458_SNP,3L_332510_SNP,3L_332511_INS,3L_331730_SNP,3L_331436_SNP,3L_332433_SNP,3L_332490_SNP,3L_332002_SNP,3L_332593_INS,3L_332954_SNP,3L_333001_SNP,3L_329444_SNP,3L_333154_SNP,3L_331997_SNP,3L_332955_SNP,3L_332847_SNP,3L_329377_SNP,3L_330588_SNP,3L_330235_SNP,3L_329360_INS,3L_333175_SNP,3L_329786_SNP,3L_328971_SNP,3L_332790_INS,3L_330328_SNP,3L_333168_SNP	3.122e-32,1.062e-31,1.379e-31,2.069e-31,1.392e-17,1.408e-17,7.692e-14,2.036e-13,2.22e-12,1.309e-11,1.417e-11,1.523e-11,2.371e-11,9.738e-11,1.114e-10,1.152e-10,1.281e-09,1.699e-09,2.092e-09,5.262e-09,2.362e-08,1.424e-07,1.45e-07,1.846e-07,4.198e-07,1.792e-06,1.857e-06	3L_338736_SNP,3L_335010_SNP,3L_338477_SNP,3L_338727_SNP,3L_337910_SNP,3L_341693_SNP,3L_327877_SNP,3L_341993_SNP,3L_338872_SNP,3L_342001_SNP,3L_328407_SNP,3L_328173_SNP,3L_338680_SNP,3L_338818_SNP,3L_342035_SNP,3L_328764_SNP,3L_330856_SNP,3L_328503_SNP,3L_337232_SNP,3L_333423_SNP,3L_337234_SNP,3L_340050_SNP,3L_340052_SNP,3L_334372_SNP,3L_330994_SNP,3L_347087_SNP,3L_331062_SNP,3L_338860_SNP,3L_3258…	8.461e-27,3.708e-20,8.432e-18,6.211e-17,4.792e-14,1.303e-13,9.933e-13,1.058e-12,2.978e-12,3.116e-12,3.495e-12,4.215e-12,5.882e-12,8.228e-12,8.973e-12,9.608e-12,1.106e-11,1.14e-11,2.861e-11,3.369e-11,4.566e-11,5.81e-11,8.251e-11,9.397e-11,2.455e-10,2.465e-10,4.061e-10,6.74e-10,8.521e-10,1.505e-09,1.64e-09,1.74e-09,4.32e-09,4.396e-09,5.808e-09,6.08e-09,8.037e-09,1.145e-08,2.185e-08,2.681e-08,3.066e…	2L_17898325_DEL,X_13368468_SNP,2L_4223026_DEL,2L_4223031_SNP,2R_6343736_DEL,3R_26891217_SNP	4.801e-07,8.386e-07,1.292e-06,1.375e-06,1.844e-06,1.877e-06
FBgn0035146	3L	599094	604008	-	3L_602297_SNP(trans-intra-arm)			3L_602297_SNP,3L_602133_SNP,3L_602179_INS	1.197e-09,1.7e-09,5.72e-09
FBgn0035151	3L	677879	680326	-	3L_683252_SNP(trans-intra-arm),3L_680607_SNP(cis)	3L_680894_SNP,3L_680607_SNP,3L_681042_SNP	2.962e-18,4.547e-18,4e-17	3L_683252_SNP,3L_683291_SNP,3L_681983_SNP,3L_681840_SNP,3L_682754_SNP,3L_681811_SNP,3L_681805_SNP,3L_683253_SNP,3L_689940_SNP,3L_690497_SNP,3L_683279_SNP,3L_690236_SNP,3L_690240_SNP,3L_686454_SNP,3L_690568_SNP,3L_689649_SNP,3L_690101_SNP,3L_690336_SNP,3L_690398_SNP,3L_689634_SNP	1.16e-21,3.716e-19,5.648e-17,3.041e-16,1.648e-15,9.114e-13,2.973e-12,4.388e-12,5.724e-12,5.805e-12,1.006e-11,3.237e-11,4.298e-11,5.211e-11,5.791e-11,6.209e-11,7.268e-11,8.331e-11,8.62e-11,1.943e-10	3R_13673521_SNP	1.727e-12
FBgn0035158	3L	705948	708205	-	3L_707969_SNP(cis),3L_706088_SNP(cis)	3L_707969_SNP,3L_707971_SNP,3L_708143_DEL,3L_707954_SNP,3L_706088_SNP	1.478e-25,9.166e-20,4.721e-10,1.649e-08,6.303e-08
FBgn0035162	3L	826720	833385	-	3L_834152_SNP(cis),3L_1386571_SNP(trans-intra-arm),2R_9197403_SNP(trans-inter-arm)	3L_834152_SNP,3L_834055_SNP,3L_833026_INS,3L_832955_SNP,3L_832949_SNP,3L_832489_SNP,3L_833027_INS,3L_833943_SNP,3L_833713_SNP,3L_834085_SNP,3L_833267_SNP,3L_834070_SNP,3L_834113_SNP,3L_833287_SNP,3L_834109_SNP,3L_832887_SNP,3L_833339_SNP,3L_833745_SNP,3L_832475_SNP,3L_832960_DEL,3L_834269_SNP,3L_834284_SNP,3L_833661_SNP,3L_833648_SNP,3L_833265_SNP,3L_832953_SNP,3L_832920_SNP,3L_834300_SNP,3L_8337…	2.97e-17,1.902e-15,8.797e-14,3.129e-13,3.997e-13,7.56e-13,2.526e-12,3.825e-12,1.011e-11,1.982e-11,7.994e-11,9.672e-11,1.278e-10,1.966e-10,2.201e-10,5.383e-10,7.155e-10,1.006e-09,1.356e-09,1.774e-09,2.225e-09,2.227e-09,2.769e-09,3.943e-09,4.911e-09,5.527e-09,6.967e-09,9.007e-09,1.015e-07,1.65e-07,1.151e-06	3L_834470_SNP,3L_834565_SNP,3L_834580_SNP,3L_832190_SNP,3L_834970_SNP,3L_831295_SNP,3L_831441_SNP,3L_834547_SNP,3L_836559_SNP,3L_835841_SNP,3L_835359_SNP,3L_836391_SNP,3L_835358_SNP,3L_835343_SNP,3L_835346_SNP,3L_831856_SNP,3L_834745_SNP,3L_840589_SNP,3L_831827_SNP,3L_828097_SNP,3L_831540_SNP,3L_839031_SNP,3L_828130_SNP,3L_841217_SNP,3L_834389_SNP,3L_838845_SNP,3L_838924_SNP,3L_838876_DEL,3L_8279…	3.027e-17,1.09e-16,7.484e-16,9.464e-15,1.257e-13,2.161e-13,9.552e-13,5.929e-12,6.565e-12,7.924e-12,5.052e-11,5.053e-11,5.636e-11,6.603e-11,6.603e-11,1.109e-10,1.43e-10,2.502e-10,1.251e-09,2.718e-09,2.978e-09,3.693e-09,6.641e-09,6.761e-09,7.283e-09,1.033e-08,1.25e-08,1.85e-08,2.087e-08,2.239e-08,3.019e-08,3.22e-08,3.395e-08,3.945e-08,3.962e-08,4.82e-08,6.039e-08,1.318e-07,1.419e-07,1.543e-07,1.987…	2R_9197356_SNP,2R_9197355_SNP,2R_9197403_SNP	3.947e-07,6.314e-07,8.795e-07
FBgn0035164	3L	836667	837821	-	3L_837182_SNP(cis),3L_837788_SNP(cis),3L_836529_SNP(cis)	3L_837182_SNP,3L_837168_SNP,3L_836576_SNP,3L_837098_SNP,3L_837788_SNP,3L_836529_SNP,3L_838324_SNP,3L_837035_SNP	2.748e-14,3.52e-12,1.021e-08,2.658e-08,5.975e-08,6.298e-08,1.747e-07,1.837e-07	3L_16206469_SNP,3L_1533934_SNP	7.675e-08,1.583e-07
FBgn0035166	3L	839980	841360	-	3L_841447_DEL(cis),3L_841246_SNP(cis)	3L_841447_DEL,3L_841246_SNP,3L_841195_SNP,3L_841316_SNP,3L_841372_SNP,3L_841357_SNP,3L_841297_SNP,3L_841868_SNP,3L_841855_SNP,3L_841899_SNP,3L_841432_SNP,3L_841993_SNP,3L_841587_SNP,3L_841975_SNP,3L_841978_SNP,3L_841897_SNP	6.152e-24,4.465e-19,3.129e-18,7.024e-17,1.096e-16,1.756e-16,2.843e-15,3.474e-11,6.817e-11,6.086e-10,7.283e-10,1.994e-09,5.86e-09,1.27e-08,1.837e-08,1.552e-07
FBgn0035168	3L	843926	851080	+	3L_843433_SNP(cis)	3L_843399_SNP,3L_843430_SNP,3L_843432_SNP,3L_843433_SNP,3L_843402_SNP	4.027e-16,1.917e-14,1.155e-13,1.028e-12,5.038e-10
FBgn0035169	3L	851346	852673	+	3R_7993456_SNP(trans-inter-arm)					3R_7993456_SNP	3.711e-09
FBgn0035193	3L	1237133	1238319	-	3L_1238442_INS(cis)	3L_1238442_INS,3L_1238457_SNP	2.754e-11,1.221e-10
FBgn0035194	3L	1246986	1247677	-	3L_1248731_SNP(trans-intra-arm)	3L_1248665_SNP,3L_1248539_SNP	5.393e-12,9.975e-12	3L_1248731_SNP,3L_1249865_SNP,3L_1244500_SNP,3L_1251727_DEL,3L_1251871_SNP,3L_1249505_SNP,3L_1242662_SNP,3L_1242605_SNP,3L_1232942_SNP,3L_1242653_SNP,3L_1250523_SNP,3L_1251853_SNP,3L_1250338_SNP,3L_1249421_SNP,3L_1250310_DEL	1.917e-12,3.791e-12,8.247e-09,1.182e-08,2.148e-08,3.436e-08,7.257e-08,9.673e-08,9.888e-08,2.173e-07,2.387e-07,2.495e-07,2.662e-07,2.867e-07,3.721e-07
FBgn0035205	3L	1307224	1311805	+	3L_1316691_DEL(trans-intra-arm)	3L_1311081_SNP,3L_1311180_SNP	4.872e-08,1.789e-07	3L_1316869_SNP,3L_1316691_DEL,3L_1308911_SNP,3L_1316770_SNP,3L_1308916_SNP,3L_1316621_SNP,3L_1315975_SNP,3L_1316073_SNP	7.121e-09,1.136e-08,2.256e-08,2.365e-08,2.506e-08,3.222e-08,7.907e-08,1.733e-07
FBgn0035206	3L	1311719	1313377	-	3L_1316691_DEL(trans-intra-arm),3L_1311081_SNP(cis)	3L_1310862_SNP,3L_1311072_SNP,3L_1311081_SNP,3L_1311180_SNP,3L_1311779_SNP,3L_1311790_SNP,3L_1312743_SNP,3L_1311934_SNP,3L_1311936_SNP,3L_1311540_SNP,3L_1311568_SNP,3L_1311654_SNP,3L_1313509_SNP,3L_1313634_SNP,3L_1313558_SNP,3L_1313259_SNP,3L_1313594_SNP	2.284e-27,1.516e-22,1.924e-22,3.771e-22,3.497e-21,3.577e-21,2.427e-16,9.72e-12,8.992e-11,1.994e-10,3.529e-10,5.479e-10,3.686e-07,1.625e-06,2.229e-06,3.909e-06,4.706e-06	3L_1316869_SNP,3L_1316770_SNP,3L_1316691_DEL,3L_1308911_SNP,3L_1305810_SNP,3L_1309178_SNP,3L_1308916_SNP,3L_1309640_SNP,3L_1316412_SNP,3L_1306200_SNP,3L_1305813_SNP,3L_1306203_SNP,3L_1315975_SNP,3L_1318431_SNP,3L_1308928_SNP,3L_1316073_SNP,3L_1316084_SNP,3L_1315931_SNP,3L_1309397_SNP,3L_1315912_SNP,3L_1315979_SNP,3L_1318732_SNP,3L_1318781_SNP,3L_1306241_SNP,3L_1309058_SNP,3L_1315733_SNP,3L_131023…	7.497e-29,1.825e-28,5.015e-25,5.201e-23,7.875e-23,9.632e-23,1.748e-22,2.03e-22,3.753e-22,1.756e-21,2.373e-21,7.576e-21,1.503e-19,2.05e-19,4.795e-19,6.297e-19,1.269e-18,1.814e-18,3.951e-18,4.248e-18,4.248e-18,8.255e-18,1.194e-17,1.337e-17,1.623e-17,2.703e-17,5.037e-17,9.566e-17,1.031e-16,1.109e-16,1.348e-16,3.989e-16,4.024e-16,4.565e-16,4.676e-16,8.406e-16,6.474e-15,1.233e-14,1.541e-14,1.83e-14,2.…	X_3939198_SNP,2R_18946035_SNP,2L_19295415_SNP,X_14794103_SNP	8.946e-07,2.752e-06,4.206e-06,4.226e-06
FBgn0035207	3L	1313696	1318330	+	3L_1323932_SNP(trans-intra-arm)			3L_1323932_SNP,3L_1307013_SNP	4.895e-10,1.121e-08
FBgn0035211	3L	1333239	1335359	-	3L_1334192_SNP(cis)	3L_1334192_SNP,3L_1333782_SNP,3L_1333797_SNP,3L_1335763_SNP,3L_1333767_SNP,3L_1333773_SNP,3L_1335096_SNP,3L_1334569_SNP,3L_1335569_SNP,3L_1335567_SNP,3L_1334471_SNP,3L_1334472_SNP,3L_1333106_SNP	5.964e-14,1.14e-13,1.162e-13,2.083e-11,8.443e-11,1.011e-10,2.973e-10,3.787e-10,6.226e-10,1.065e-09,8.54e-09,1.365e-08,1.523e-08	3L_1329746_SNP,3L_1329828_SNP,3L_1329846_SNP,3L_1329868_SNP,3L_1330759_SNP,3L_1329824_SNP,3L_1330708_SNP,3L_1329783_SNP,3L_1329903_SNP,3L_1329825_SNP,3L_1329784_SNP,3L_1330766_INS,3L_1332041_SNP	3.537e-10,4.634e-10,5.281e-10,5.369e-10,6.275e-10,7.822e-10,1.259e-09,1.426e-09,1.618e-09,2.12e-09,2.882e-09,5.98e-09,8.97e-09
FBgn0035227	3L	1523414	1534034	-	3L_1529374_SNP(trans-intra-arm)			3L_1529374_SNP	2.136e-08
FBgn0035235	3L	1559813	1568608	-	3L_1561932_SNP(trans-intra-arm),2R_12512918_SNP(trans-inter-arm)			3L_1561932_SNP,3L_1562502_SNP	4.555e-10,6.45e-10	2R_12512918_SNP	2.458e-09
FBgn0035237	3L	1576699	1600845	+	3L_1599511_SNP(trans-intra-arm),3L_1600019_SNP(cis),X_15569169_SNP(trans-inter-arm)	3L_1600019_SNP	5.768e-08	3L_1599511_SNP,3L_1599475_SNP	3.742e-11,5.174e-11	X_15569169_SNP	8.434e-08
FBgn0035244	3L	1618414	1623413	+	X_15480849_SNP(trans-inter-arm)					X_15480849_SNP	1.591e-09
FBgn0035247	3L	1637942	1639235	-	3L_1637990_SNP(cis),3L_1636982_SNP(cis)	3L_1637990_SNP,3L_1637613_SNP,3L_1637187_SNP,3L_1638215_SNP,3L_1639262_SNP,3L_1637909_SNP,3L_1638206_SNP,3L_1637963_SNP,3L_1639539_SNP,3L_1639519_SNP,3L_1637942_SNP,3L_1637971_SNP,3L_1639433_SNP,3L_1637984_SNP,3L_1638422_SNP,3L_1639452_SNP,3L_1637978_SNP,3L_1638131_SNP,3L_1638002_SNP,3L_1639664_SNP,3L_1639981_SNP,3L_1640177_SNP,3L_1639369_SNP,3L_1637999_SNP,3L_1640078_SNP,3L_1640060_SNP,3L_163698…	9.718e-16,1.873e-13,8.503e-13,9.874e-13,1.013e-12,1.344e-12,1.379e-12,1.59e-12,1.94e-12,2.134e-12,2.402e-12,3.639e-12,3.796e-12,4.185e-12,7.634e-12,1.017e-11,2.209e-10,2.388e-10,2.528e-10,3.361e-10,1.414e-09,1.889e-09,2.005e-09,2.994e-09,3.72e-09,5.63e-09,5.677e-09,6.086e-09,1.3e-08,2.198e-08,3.717e-08,6.038e-08,7.515e-08,9.564e-08,1.892e-07,3.342e-07,7.181e-07,9.96e-07	3L_1643582_SNP,3L_1643615_SNP,3L_1641632_SNP,3L_1640282_SNP,3L_1641302_SNP,3L_1636888_SNP,3L_1635759_SNP,3L_1641602_SNP,3L_1642973_SNP,3L_1641968_SNP,3L_1640402_SNP,3L_1636626_SNP,3L_1642556_SNP,3L_1634414_SNP,3L_1641509_SNP,3L_1636639_SNP,3L_1641329_SNP,3L_1649055_SNP,3L_1641881_SNP,3L_1643318_SNP,3L_1649061_DEL,3L_1642607_SNP,3L_1642310_SNP,3L_1643849_SNP,3L_1648844_SNP,3L_1635887_SNP,3L_163661…	1.484e-15,3.533e-15,3.282e-13,9.333e-13,1.192e-12,1.258e-12,1.689e-12,2.113e-12,2.133e-12,2.738e-12,3.059e-12,3.82e-12,3.92e-12,4.618e-12,7.564e-12,9.266e-12,1.161e-11,7.806e-11,8.21e-11,8.516e-11,1.163e-10,1.17e-10,1.688e-10,1.757e-10,1.917e-10,1.948e-10,2.073e-10,2.48e-10,3.514e-10,3.666e-10,4.74e-10,4.971e-10,5.006e-10,6.277e-10,7.239e-10,7.802e-10,1.226e-09,1.28e-09,2.087e-09,2.134e-09,2.201e…	2R_2620921_SNP,2R_2618640_SNP,2R_2478519_SNP,2R_2620954_SNP,2R_2530230_SNP,2R_2432103_SNP,2R_2642161_SNP,2R_2443298_SNP,2R_2535132_SNP,2R_2608436_SNP,2R_2524042_SNP,2R_2658778_SNP,2R_2689465_SNP,2R_2500342_SNP,2R_2534893_SNP,2R_2565704_SNP,2R_2510163_SNP,2R_2657528_SNP,2R_2583974_SNP,2R_17144383_SNP,2R_2652855_SNP,2R_2665114_SNP,2R_2551250_SNP,2L_12827205_SNP,2R_9815444_SNP,2R_2632330_SNP,2R_2535…	5.733e-08,1.119e-07,2.228e-07,2.351e-07,2.764e-07,3.836e-07,5.553e-07,7.978e-07,1.295e-06,1.356e-06,1.492e-06,1.572e-06,1.591e-06,1.593e-06,1.663e-06,1.663e-06,1.778e-06,1.897e-06,2.028e-06,2.283e-06,2.299e-06,2.629e-06,2.828e-06,3.559e-06,3.777e-06,3.989e-06,4.142e-06,4.261e-06,4.281e-06,4.321e-06,4.397e-06,4.783e-06,4.891e-06,5.226e-06,5.669e-06,5.764e-06,5.815e-06,5.9e-06,5.994e-06,6.129e-06,6…
FBgn0035248	3L	1645467	1645983	+	3L_1647158_SNP(trans-intra-arm),3L_14430811_SNP(trans-intra-arm)	3L_1645799_SNP,3L_1646791_SNP,3L_1646789_SNP,3L_1646612_SNP,3L_1646707_SNP,3L_1646153_SNP,3L_1646778_SNP,3L_1645388_SNP,3L_1645280_SNP,3L_1645367_INS,3L_1645658_SNP,3L_1645474_SNP,3L_1645340_SNP,3L_1646742_SNP,3L_1645256_SNP,3L_1646255_SNP,3L_1645215_SNP,3L_1646690_SNP	2.278e-12,9.679e-12,9.753e-12,1.261e-11,2.119e-11,2.397e-11,1.605e-10,1.122e-09,1.485e-09,2.678e-09,2.927e-09,3.668e-09,3.67e-09,3.859e-09,5.874e-09,1.047e-08,1.311e-08,3.577e-08	3L_1647158_SNP,3L_1647105_SNP,3L_1647147_SNP,3L_14430811_SNP	1.931e-12,2.818e-11,3.821e-10,2.2e-07
FBgn0035249	3L	1645931	1647464	-	3L_1646816_SNP(cis)	3L_1646816_SNP,3L_1646750_SNP,3L_1646498_SNP,3L_1646740_SNP,3L_1646586_SNP,3L_1646876_SNP,3L_1646981_SNP,3L_1647113_SNP,3L_1647061_SNP,3L_1647076_SNP	5.007e-12,6.835e-12,1.063e-11,2.435e-11,3.214e-11,5.99e-11,6.718e-11,2.617e-08,3.173e-08,1.181e-07
FBgn0035262	3L	1720616	1723153	-	3L_1723568_SNP(cis)	3L_1723568_SNP,3L_1723744_SNP,3L_1723722_DEL,3L_1723819_SNP,3L_1723339_SNP,3L_1723320_DEL,3L_1723290_SNP,3L_1723798_SNP,3L_1723122_SNP,3L_1723030_SNP,3L_1724145_SNP,3L_1721484_SNP,3L_1721518_SNP,3L_1722195_SNP	6.637e-14,2.729e-13,4.587e-13,2.365e-12,3.276e-12,5.585e-11,7.196e-11,1.306e-09,6.179e-09,2.732e-08,5.16e-08,6.799e-08,2.714e-07,7.429e-07	3L_1721622_SNP,3L_1721630_SNP,3L_1719460_SNP,3L_1725740_SNP,3L_1725390_SNP,3L_1722021_SNP,3L_1725675_DEL,3L_1718548_SNP,3L_1718570_INS,3L_1728426_SNP,3L_1722141_SNP,3L_1731275_SNP,3L_1729225_SNP,3L_1731975_SNP,3L_1719487_SNP,3L_1727047_SNP,3L_1731091_SNP,3L_1718230_SNP,3L_1728858_SNP,3L_1719187_SNP,3L_1728797_SNP,3L_1733205_SNP,3L_1731239_INS,3L_1734509_SNP,3L_1734436_SNP,3L_1718694_SNP,3L_173263…	6.103e-13,7.969e-13,1.005e-11,1.573e-11,6.988e-11,3.803e-10,6.369e-10,7.22e-10,8.555e-10,1.001e-09,1.053e-09,1.144e-09,1.83e-09,1.905e-09,2.087e-09,2.2e-09,2.306e-09,2.466e-09,3.069e-09,5.783e-09,6.163e-09,7.552e-09,8.7e-09,9.658e-09,1.313e-08,1.506e-08,1.507e-08,1.522e-08,1.817e-08,1.992e-08,2.094e-08,3.207e-08,3.632e-08,4.308e-08,4.526e-08,4.55e-08,5.094e-08,5.478e-08,6.295e-08,6.432e-08,7.721e…	2L_3523077_DEL,2R_10002994_SNP,2R_10002982_DEL,2R_9634693_SNP,2R_10003023_SNP	2.575e-07,2.638e-07,4.186e-07,8.586e-07,1.565e-06
FBgn0035264	3L	1730993	1735767	-	3L_1735858_SNP(cis),3L_1735114_SNP(cis)	3L_1735858_SNP,3L_1736049_SNP,3L_1735114_SNP,3L_1735302_SNP,3L_1735150_SNP,3L_1736172_DEL,3L_1735299_SNP,3L_1735277_SNP,3L_1736507_SNP,3L_1730066_SNP,3L_1730048_SNP,3L_1730170_SNP,3L_1730172_SNP,3L_1730174_SNP,3L_1736557_SNP,3L_1731810_SNP,3L_1736145_SNP,3L_1735192_SNP,3L_1730245_SNP,3L_1735557_SNP,3L_1735595_SNP,3L_1736393_SNP,3L_1736501_SNP,3L_1735712_SNP,3L_1735239_DEL,3L_1735985_SNP,3L_173583…	3.46e-38,3.281e-13,4.756e-11,3.98e-10,4.101e-10,5.613e-10,6.217e-10,3.183e-09,3.989e-09,3.029e-08,5.187e-08,7.303e-08,7.303e-08,7.303e-08,7.504e-08,1.111e-07,2.263e-07,2.978e-07,3.286e-07,3.449e-07,4.355e-07,6.301e-07,7.169e-07,1.101e-06,1.112e-06,1.568e-06,1.586e-06,1.615e-06	3L_1728736_SNP,3L_1732815_SNP,3L_1737596_SNP,3L_1736777_SNP,3L_1737587_SNP,3L_1734252_SNP,3L_1737732_SNP,3L_1736798_SNP,3L_1736831_SNP,3L_1736801_SNP,3L_1736771_SNP,3L_1742213_SNP,3L_1728679_SNP,3L_1729023_SNP,3L_1737436_SNP,3L_1736828_SNP,3L_1737329_SNP,3L_1734306_SNP,3L_1734282_SNP,3L_1736931_SNP,3L_1739246_SNP,3L_1738502_SNP,3L_1738256_SNP,3L_10197930_SNP,3L_1729225_SNP,3L_1736944_SNP,3L_17382…	1.784e-10,8.785e-10,2.04e-09,2.325e-09,2.728e-09,2.932e-09,3.091e-09,3.599e-09,3.631e-09,4.422e-09,4.642e-09,6.594e-09,7.261e-09,7.635e-09,8.532e-09,1.305e-08,1.364e-08,1.414e-08,5.821e-08,1.687e-07,4.468e-07,4.86e-07,5.594e-07,5.604e-07,5.701e-07,6.026e-07,6.509e-07,7.983e-07,9.303e-07,9.954e-07,1.062e-06,1.117e-06,1.168e-06,1.186e-06,1.229e-06,1.257e-06,1.284e-06,1.542e-06,1.623e-06,1.724e-06,2…	2L_9576758_SNP,2L_9576778_SNP,2L_9576805_SNP,2L_9576780_SNP	9.481e-07,9.869e-07,1.128e-06,1.221e-06
FBgn0035265	3L	1735853	1738106	-	3L_1737596_SNP(cis)	3L_1737587_SNP,3L_1737596_SNP,3L_1737732_SNP,3L_1738123_INS,3L_1737329_SNP,3L_1737436_SNP,3L_1736393_SNP,3L_1737286_SNP,3L_1736501_SNP,3L_1737944_DEL,3L_1738502_SNP,3L_1737993_SNP,3L_1737254_SNP,3L_1738261_SNP,3L_1736445_SNP,3L_1738256_SNP,3L_1735557_SNP,3L_1735302_SNP,3L_1735299_SNP,3L_1737428_SNP,3L_1735392_SNP,3L_1738323_SNP	6.228e-10,7.049e-10,2.073e-09,3.888e-09,4.044e-09,6.563e-09,1.568e-08,2.171e-08,2.551e-08,2.704e-08,6.52e-08,1.521e-07,1.578e-07,2.069e-07,2.229e-07,3.415e-07,3.69e-07,3.747e-07,3.881e-07,4.116e-07,5.126e-07,5.396e-07	3L_1740248_SNP,3L_1736944_SNP,3L_1736931_SNP,3L_1736920_SNP	4.246e-08,4.396e-08,1.799e-07,4.405e-07
FBgn0035279	3L	1824129	1831783	-	3L_1824678_SNP(cis),3R_23495246_SNP(trans-inter-arm),3R_6188501_SNP(trans-inter-arm)	3L_1824678_SNP,3L_1824188_SNP,3L_1824708_SNP,3L_1824085_SNP,3L_1823183_SNP,3L_1824948_SNP,3L_1824969_DEL,3L_1824064_SNP,3L_1823386_SNP,3L_1824976_SNP,3L_1824615_SNP,3L_1824001_SNP,3L_1824725_SNP,3L_1830901_SNP,3L_1824980_SNP,3L_1824981_SNP,3L_1825084_SNP	6.489e-17,6.271e-14,2.187e-11,1.058e-10,1.452e-10,2.166e-10,2.639e-10,3.14e-10,3.289e-10,9.944e-10,1.227e-09,1.307e-09,1.337e-09,1.514e-09,2.412e-09,2.586e-09,1.186e-08	3L_1822925_SNP,3L_1827943_SNP,3L_1826991_SNP,3L_1823116_SNP,3L_1822293_SNP,3L_1821844_SNP,3L_1823063_SNP,3L_1828162_SNP,3L_1825732_SNP,3L_1826898_SNP,3L_1825378_SNP,3L_1823053_SNP,3L_1821685_SNP,3L_1826006_SNP,3L_1828552_SNP,3L_1827084_SNP,3L_1827087_SNP,3L_1827971_SNP	1.698e-12,4.551e-11,8.873e-11,8.978e-11,1.759e-10,2.674e-10,3.219e-10,3.675e-10,6.694e-10,9.507e-10,1.093e-09,1.233e-09,1.361e-09,2.525e-09,8.918e-09,1.386e-08,3.497e-08,3.728e-08	3R_23495246_SNP,3R_6188501_SNP,3R_6185827_SNP,3R_6185982_SNP,2L_14471337_SNP,3R_6201273_SNP	5.134e-09,1.026e-08,1.628e-08,1.628e-08,2.171e-08,3.061e-08
FBgn0035280	3L	1832636	1835164	-	3L_1833896_SNP(trans-intra-arm)			3L_1833896_SNP	4.405e-09
FBgn0035285	3L	1865430	1869491	+	3L_1863369_SNP(trans-intra-arm)			3L_1863369_SNP,3L_1866595_SNP	2.818e-09,3.436e-08
FBgn0035295	3L	1947565	1950262	+	3L_1947973_SNP(cis)	3L_1947973_SNP,3L_1947959_SNP,3L_1948052_SNP,3L_1947008_SNP,3L_1947040_SNP,3L_1947104_SNP,3L_1949700_SNP,3L_1947048_SNP,3L_1947946_SNP,3L_1947592_SNP,3L_1946870_SNP,3L_1948054_SNP,3L_1949726_SNP,3L_1948440_SNP,3L_1948366_SNP,3L_1950516_SNP,3L_1948499_SNP,3L_1947765_SNP,3L_1948403_SNP,3L_1946750_SNP,3L_1947821_SNP,3L_1947203_SNP,3L_1947538_SNP,3L_1947722_SNP,3L_1951076_SNP,3L_1950467_INS,3L_194715…	5.191e-32,4.541e-22,1.147e-20,9.521e-19,1.627e-18,1.875e-18,2.139e-18,3.711e-18,4.788e-17,7.052e-17,6.065e-15,9.392e-15,3.708e-12,1.282e-11,2.85e-11,4.206e-11,2.019e-10,2.82e-10,3.524e-10,3.874e-10,7.151e-10,7.417e-10,3.19e-09,3.19e-09,4.423e-09,6.649e-09,1.307e-08,1.436e-08,2.399e-08,3.18e-08,3.273e-08,4.89e-08,1.696e-07,1.875e-07,1.974e-07,3.105e-07,3.283e-07,3.501e-07,4.038e-07,5.428e-07,6.192…	3L_1948666_SNP,3L_1949096_SNP,3L_1946402_SNP,3L_1946386_SNP,3L_1949246_SNP,3L_1949234_SNP,3L_1946360_SNP,3L_1945893_SNP,3L_1945128_SNP,3L_1945522_SNP,3L_1945853_SNP,3L_1945666_SNP,3L_1944514_SNP,3L_1944515_SNP,3L_1945763_SNP,3L_1951880_SNP,3L_1945611_SNP,3L_1945610_SNP,3L_1945098_SNP,3L_1946257_SNP,3L_1944925_SNP,3L_1945837_SNP,3L_1944517_SNP,3L_1951458_SNP,3L_1955108_SNP,3L_1955093_SNP,3L_194449…	8.77e-15,9.367e-13,2.72e-11,4.317e-11,4.672e-11,1.078e-10,1.207e-09,2.306e-09,2.958e-09,5.739e-09,6.868e-09,7.373e-09,8.616e-09,8.616e-09,1.115e-08,1.238e-08,1.278e-08,1.335e-08,2.875e-08,6.322e-08,7.327e-08,1.222e-07,1.734e-07,2.481e-07,4.039e-07,4.393e-07,4.432e-07,6.019e-07,6.343e-07,6.379e-07,7.223e-07,8.761e-07,1.049e-06,1.135e-06,1.271e-06,1.293e-06,1.329e-06,1.441e-06,1.522e-06,1.888e-06,2…	2L_7244956_SNP,2R_20784767_SNP,2L_7636372_SNP	7.714e-07,1.499e-06,1.681e-06
FBgn0035298	3L	1963143	1966805	+	3L_1964657_SNP(trans-intra-arm),3R_13014368_SNP(trans-inter-arm)			3L_1964657_SNP,3L_1964633_SNP,3L_1964614_SNP,3L_1964621_SNP,3L_1964627_SNP,3L_1964636_SNP,3L_1964637_SNP,3L_1964617_SNP,3L_1964639_SNP,3L_1964462_SNP,3L_1964622_SNP,3L_1964504_SNP,3L_1959734_SNP,3L_1958872_SNP,3L_1964305_SNP,3L_1959373_SNP,3L_1965475_SNP,3L_1964330_SNP,3L_1964809_SNP,3L_1964822_SNP,3L_1958869_SNP,3L_1964512_SNP,3L_1958841_SNP,3L_1964595_SNP,3L_1965463_SNP,3L_1965325_SNP,3L_195598…	4.797e-12,1.555e-11,3.13e-11,3.886e-11,4.849e-11,6.058e-11,6.846e-11,7.651e-11,8.007e-11,1.013e-10,1.275e-10,7.369e-08,9.896e-08,1.07e-07,1.082e-07,1.587e-07,3.293e-07,3.549e-07,3.654e-07,3.654e-07,3.994e-07,4.02e-07,5.322e-07,5.912e-07,7.084e-07,7.471e-07,8.247e-07	3R_13014368_SNP	7.592e-07
FBgn0035308	3L	2153201	2163863	-	3L_4545923_SNP(trans-intra-arm)			3L_4545925_SNP,3L_4545923_SNP	1.463e-08,1.829e-08
FBgn0035318	3L	2235284	2237076	-	3L_2233357_SNP(trans-intra-arm),3L_10268003_SNP(trans-intra-arm)	3L_2236215_SNP,3L_2236264_SNP,3L_2235774_SNP,3L_2236808_SNP,3L_2234842_SNP,3L_2236350_SNP,3L_2235471_SNP	6.299e-12,4.468e-11,1.257e-10,2.646e-09,7.782e-09,2.854e-08,4.019e-08	3L_2233357_SNP,3L_2233165_SNP,3L_2232880_SNP,3L_2232505_SNP,3L_2232478_SNP,3L_2232517_SNP,3L_2232472_SNP,3L_2241742_SNP,3L_2233753_SNP,3L_2231416_SNP,3L_2231425_SNP,3L_2229440_SNP,3L_2233623_SNP,3L_2231383_SNP,3L_2231345_SNP,3L_2244036_SNP,3L_2233546_SNP,3L_2243951_SNP,3L_2231386_SNP,3L_2228298_SNP,3L_2239945_SNP,3L_2232190_SNP,3L_7077991_SNP,3L_2243884_SNP,3L_2239947_SNP,3L_2244102_SNP,3L_224896…	2.925e-12,4.151e-12,1.345e-11,2.896e-11,1.177e-10,2.438e-10,2.925e-10,3.754e-10,5.288e-10,9.39e-10,9.39e-10,1.064e-09,1.076e-09,1.544e-09,2.284e-09,2.659e-09,6.778e-09,6.818e-09,6.869e-09,1.649e-08,1.908e-08,2.06e-08,3.151e-08,4.021e-08,5.774e-08,5.824e-08,5.958e-08,6.149e-08,6.153e-08,6.243e-08,6.259e-08,9.253e-08,1.245e-07,1.306e-07,1.399e-07,1.434e-07,1.638e-07,1.943e-07,2.409e-07,2.7e-07,3.31…	2R_10609432_SNP,X_4488148_SNP	1.131e-06,1.618e-06
FBgn0035331	3L	2322693	2345799	+	3L_2320267_SNP(trans-intra-arm)			3L_2320267_SNP	2.361e-10
FBgn0035336	3L	2373728	2376488	+	3L_2378550_SNP(trans-intra-arm)	3L_2376769_SNP,3L_2377239_SNP	9.46e-09,3.946e-08	3L_2378550_SNP	2.373e-09
FBgn0035344	3L	2476259	2478448	-	3L_2478952_SNP(cis)	3L_2478952_SNP,3L_2479058_DEL	3.677e-12,6.589e-08	3L_2479544_SNP,3L_2479464_SNP,3L_2479543_SNP,3L_2480475_SNP	1.994e-08,6.911e-08,9.847e-08,1.041e-07
FBgn0035346	3L	2488804	2492613	+	3L_2491218_SNP(trans-intra-arm),3L_2491440_SNP(trans-intra-arm)	3L_2492101_SNP,3L_2492301_SNP	2.82e-10,3.339e-10	3L_2491218_SNP,3L_2490523_SNP,3L_2491317_SNP,3L_2491440_SNP,3L_2490761_SNP	5.461e-14,6.343e-12,2.074e-11,5.058e-11,1.093e-08
FBgn0035371	3L	2768466	2772325	-	3L_2772473_SNP(cis),3L_8244184_SNP(trans-intra-arm)	3L_2772473_SNP,3L_2772005_SNP,3L_2772488_SNP,3L_2767762_SNP	1.913e-09,3.441e-09,5.636e-08,8.585e-08	3L_2756424_SNP,3L_2756427_SNP,3L_2756426_SNP,3L_2756471_SNP,3L_8244184_SNP,3L_2769585_SNP,3L_2756475_SNP,3L_2774270_SNP,3L_2780718_SNP	2.983e-08,2.983e-08,3.047e-08,3.047e-08,3.72e-08,4.488e-08,6.002e-08,9.206e-08,1.181e-07
FBgn0035383	3L	2981022	2983551	+	3L_2983418_INS(cis),3L_2981401_SNP(cis)	3L_2983704_SNP,3L_2983418_INS,3L_2983420_INS,3L_2981494_SNP,3L_2981401_SNP,3L_2982887_SNP,3L_2980862_SNP,3L_2981275_SNP,3L_2980734_SNP,3L_2981239_SNP,3L_2981656_SNP,3L_2980735_SNP,3L_2980859_SNP,3L_2984509_SNP,3L_2981767_SNP,3L_2982803_SNP,3L_2983706_SNP,3L_2983228_SNP	1.535e-13,2.371e-13,2.546e-13,4.604e-12,4.391e-11,2.61e-10,4.209e-10,1.229e-09,1.698e-09,2.995e-09,9.607e-09,1.668e-08,1.876e-08,6.746e-08,6.918e-08,1.692e-07,1.92e-07,2.648e-07	3L_2982284_SNP,3L_2982326_SNP,3L_2982371_SNP,3L_2982368_SNP,3L_2982515_SNP,3L_2978120_SNP,3L_2995403_SNP,3L_2984907_SNP,3L_2978810_SNP,3L_2965154_SNP,3L_2984627_SNP	1.999e-11,5.115e-11,6.492e-11,2.684e-10,2.264e-09,4.269e-09,4.828e-09,3.728e-08,8.76e-08,5.391e-07,5.591e-07
FBgn0035390	3L	3044113	3046812	-	3L_3044197_SNP(cis)	3L_3044197_SNP,3L_3044182_SNP,3L_3044233_SNP,3L_3044102_SNP,3L_3044514_SNP,3L_3043931_SNP,3L_3043425_SNP,3L_3043437_SNP,3L_3043342_SNP,3L_3043543_SNP	1.867e-19,1.957e-16,9.267e-13,6.673e-11,1.163e-08,6.339e-08,2.044e-07,2.044e-07,2.343e-07,3.584e-07	3L_3042624_SNP	9.891e-08
FBgn0035392	3L	3052514	3054906	+	2L_13289597_SNP(trans-inter-arm)					2L_13289597_SNP	1.831e-09
FBgn0035393	3L	3055079	3055842	+	3L_3055089_SNP(cis)	3L_3055089_SNP,3L_3055090_SNP,3L_3055257_SNP,3L_3055874_SNP,3L_3055224_SNP,3L_3055142_SNP,3L_3054953_SNP,3L_3055132_SNP,3L_3055884_SNP,3L_3054942_DEL,3L_3054269_SNP,3L_3054564_SNP,3L_3054558_SNP,3L_3054415_SNP	9.071e-15,1.876e-14,5.672e-14,1.243e-13,2.247e-13,2.453e-13,2.55e-12,2.782e-12,3.277e-12,1.309e-10,3.111e-10,1.999e-09,3.169e-09,1.839e-07
FBgn0035401	3L	3143808	3145284	+	3L_3143873_SNP(cis)	3L_3143885_SNP,3L_3143873_SNP,3L_3143837_SNP,3L_3144273_SNP,3L_3143723_SNP,3L_3143331_SNP,3L_3144399_SNP	5.535e-12,9.513e-11,1.929e-10,2.672e-10,3.694e-09,3.073e-08,1.611e-07
FBgn0035407	3L	3163786	3166250	-	2R_17006728_SNP(trans-inter-arm)					2R_17006728_SNP	1.955e-08
FBgn0035427	3L	3257878	3268184	+	3L_3261035_SNP(trans-intra-arm),3L_3262087_SNP(trans-intra-arm)			3L_3261035_SNP,3L_3262087_SNP,3L_3260533_SNP,3L_3262077_SNP	4.152e-11,1.093e-08,1.203e-08,3.173e-08
FBgn0035434	3L	3316781	3317144	+	3L_3319181_SNP(trans-intra-arm)			3L_3319181_SNP,3L_3318867_SNP	6.13e-09,8.049e-09
FBgn0035438	3L	3326265	3328626	+	3R_12855693_SNP(trans-inter-arm)					3R_12855693_SNP,3R_12855249_SNP	2.03e-12,6.867e-11
FBgn0035443	3L	3374282	3376649	+	3L_3374281_SNP(cis)	3L_3375161_SNP,3L_3375198_SNP,3L_3375206_SNP,3L_3375650_SNP,3L_3375820_SNP,3L_3375785_SNP,3L_3374658_SNP,3L_3375808_SNP,3L_3375798_SNP,3L_3374281_SNP,3L_3375172_SNP,3L_3375811_SNP,3L_3374901_SNP,3L_3375023_SNP,3L_3374277_DEL,3L_3375757_SNP,3L_3374862_SNP,3L_3374865_SNP	2.151e-11,2.151e-11,2.151e-11,2.151e-11,2.151e-11,2.446e-11,2.475e-11,3.303e-11,3.801e-11,9.856e-11,1.02e-10,2.06e-10,2.457e-10,9.684e-10,1.561e-09,1.571e-09,1.994e-09,1.381e-08	3L_3375358_SNP,3L_3375370_SNP,3L_3377758_DEL	7.116e-12,1.055e-10,3.263e-08
FBgn0035469	3L	3896900	3897498	+	3L_3902037_SNP(trans-intra-arm)			3L_3902037_SNP	2.022e-09
FBgn0035515	3L	4240173	4242603	+	3L_4240480_SNP(cis),3L_4240385_SNP(cis)	3L_4240480_SNP,3L_4240250_SNP,3L_4240262_SNP,3L_4240385_SNP,3L_4240092_SNP,3L_4240064_SNP,3L_4240332_SNP,3L_4239365_SNP,3L_4240463_SNP,3L_4239366_SNP,3L_4239411_SNP,3L_4240540_SNP,3L_4239318_SNP,3L_4239352_SNP,3L_4240014_SNP,3L_4239614_SNP,3L_4239982_SNP,3L_4239221_SNP,3L_4239739_SNP,3L_4239304_SNP,3L_4239330_SNP,3L_4239785_SNP,3L_4243503_SNP,3L_4239462_SNP,3L_4239329_SNP,3L_4242887_SNP,3L_424074…	1.142e-17,8.778e-17,9.615e-16,8.125e-15,1.916e-12,2.886e-12,3.407e-11,1.775e-10,1.986e-10,2.873e-10,3.204e-10,3.392e-10,6.517e-10,6.875e-10,6.931e-10,1.797e-09,7.596e-09,2.32e-08,2.493e-08,3.314e-08,5.107e-08,6.538e-08,9.364e-08,1.217e-07,3.049e-07,3.056e-07,5.04e-07,5.196e-07,6.86e-07,7.342e-07	3L_4243825_SNP,3L_4243754_SNP,3L_4241575_SNP,3L_4243647_SNP	1.547e-07,2.018e-07,2.589e-07,3.043e-07	2L_4157060_SNP,X_16953820_SNP	1.051e-07,6.517e-07
FBgn0035526	3L	4283851	4286865	+	3L_4283164_SNP(cis)	3L_4283143_SNP,3L_4284011_SNP,3L_4283164_SNP,3L_4283905_SNP,3L_4283266_SNP,3L_4283916_SNP,3L_4283286_SNP,3L_4283335_SNP,3L_4283538_SNP,3L_4283074_SNP,3L_4283557_DEL,3L_4283601_INS,3L_4282914_SNP,3L_4282956_SNP,3L_4282969_SNP,3L_4283293_SNP,3L_4283283_SNP,3L_4284080_SNP,3L_4284503_SNP,3L_4282869_SNP,3L_4287566_SNP,3L_4287737_SNP,3L_4287634_DEL,3L_4282979_SNP,3L_4283389_SNP,3L_4287628_DEL,3L_428767…	1.071e-36,1.673e-36,5.183e-36,9.737e-36,2.805e-33,4.096e-33,4.299e-32,5.276e-31,3.054e-30,2.094e-29,3.79e-23,1.283e-22,2.501e-22,2.078e-19,1.941e-17,1.941e-17,7.475e-17,1.507e-16,1.138e-14,2.114e-14,2.306e-14,2.306e-14,3.235e-14,3.582e-14,3.582e-14,3.582e-14,3.582e-14,7.765e-14,1.06e-13,1.508e-13,1.508e-13,1.508e-13,1.508e-13,1.508e-13,1.63e-13,1.772e-13,2.545e-13,4.921e-13,7.114e-13,7.992e-13,1.…	3L_4282261_SNP,3L_4282300_SNP,3L_4281817_SNP,3L_4282561_SNP,3L_4281838_SNP,3L_4282294_SNP,3L_4282634_SNP,3L_4282591_SNP,3L_4282599_SNP,3L_4282456_SNP,3L_4282586_SNP,3L_4282593_SNP,3L_4282507_SNP,3L_4279824_SNP,3L_4282829_SNP,3L_4288353_SNP,3L_4288355_SNP,3L_4281979_SNP,3L_4280129_SNP,3L_4289927_SNP,3L_4289916_SNP,3L_4280172_SNP,3L_4288562_SNP,3L_4290829_SNP,3L_4290059_SNP,3L_4289924_SNP,3L_428207…	5.767e-28,6.14e-28,1.031e-26,4.287e-22,7.765e-22,1.04e-21,4.153e-21,5.632e-19,8.928e-19,3.492e-18,6.342e-18,8.694e-18,9.816e-17,1.303e-16,4.502e-16,5.547e-16,5.547e-16,8.386e-16,1.323e-15,2.741e-15,4.52e-15,7.312e-15,9.16e-15,1.138e-14,1.223e-14,1.304e-14,2.271e-14,2.306e-14,2.306e-14,2.736e-14,2.76e-14,3.326e-14,3.582e-14,3.582e-14,3.582e-14,3.582e-14,3.85e-14,3.85e-14,3.975e-14,1.012e-13,1.146e…	3R_9543576_SNP,X_6024784_SNP,X_4633856_DEL,X_21157295_INS,3R_6694430_SNP	2.22e-07,3.05e-07,3.126e-07,5.376e-07,6.424e-07
FBgn0035528	3L	4291208	4292246	-	3L_4291287_SNP(cis),2R_7929767_SNP(trans-inter-arm)	3L_4291287_SNP	1.213e-08			2R_7929767_SNP	2.715e-08
FBgn0035533	3L	4322491	4364102	-	3L_4324150_SNP(trans-intra-arm)			3L_4324150_SNP,3L_4324138_SNP	4.023e-30,6.311e-27
FBgn0035534	3L	4364550	4365243	+	3L_4364482_SNP(cis)	3L_4364384_SNP,3L_4364381_SNP,3L_4364709_SNP,3L_4364682_SNP,3L_4364724_SNP,3L_4364409_SNP,3L_4364297_MNP,3L_4364308_SNP,3L_4364730_SNP,3L_4364304_SNP,3L_4364539_SNP,3L_4364686_SNP,3L_4364667_SNP,3L_4364376_SNP,3L_4364401_SNP,3L_4364670_SNP,3L_4364338_SNP,3L_4364355_SNP,3L_4364695_SNP,3L_4364368_SNP,3L_4364357_SNP,3L_4364459_SNP,3L_4364488_SNP,3L_4364358_SNP,3L_4364659_SNP,3L_4364468_SNP,3L_436436…	3.254e-10,3.346e-10,4.161e-10,7.574e-10,8.852e-10,9.613e-10,1.062e-09,1.062e-09,1.068e-09,1.159e-09,1.313e-09,1.426e-09,2.172e-09,3.034e-09,3.779e-09,4.14e-09,5.71e-09,6.563e-09,6.935e-09,8.038e-09,9.363e-09,9.544e-09,1.278e-08,1.299e-08,1.333e-08,1.342e-08,1.355e-08,1.602e-08,1.929e-08,2.786e-08,2.861e-08,3.999e-08,4.339e-08,4.993e-08,5.911e-08,6.438e-08,6.513e-08,3.123e-07	3L_4366743_SNP	5.538e-09
FBgn0035539	3L	4384442	4403181	+	3L_4384850_SNP(cis)	3L_4384850_SNP,3L_4384862_SNP,3L_4384857_SNP,3L_4384863_SNP,3L_4384784_SNP	4.466e-09,4.576e-09,1.269e-08,1.865e-08,2.474e-08
[truncated: 1,163 more rows]

## Sheet: Male eQTLs
FlyBase ID	Chromosome	Gene Start (bp)	Gene End (bp)	Strand	Selected eQTLs	cis-eQTLs	cis-eQTL P-Value(s)	Intra-arm trans-eQTLs	Intra-arm trans-eQTL P-Value(s)	Inter-arm trans-eQTLs	Inter-arm trans-eQTL P-Value(s)
[truncated: 3,178 more rows]
