# Supplementary material for: Gene expression networks in the Drosophila Genetic Reference Panel
Source: HighWire-hosted journal article supplement (doi:10.1101/gr.257592.119), 2020-03-01
Supplement: Supplemental_Table_S6.xlsx.xlsx [file Supplemental_Table_S6.xlsx.xlsx]

## Sheet: Table S6A
RepBase Sequence ID	100_F1	100_F2	100_M1	100_M2	101_F1	101_F2	101_M1	101_M2	105_F1	105_F2	105_M1	105_M2	109_F1	109_F2	109_M1	109_M2	129_F1	129_F2	129_M1	129_M2	136_F1	136_F2	136_M1	136_M2	138_F1	138_F2	138_M1	138_M2	142_F1	142_F2	142_M1	142_M2	149_F1	149_F2	149_M1	149_M2	153_F1	153_F2	153_M1	153_M2	158_F1	158_F2	158_M1	158_M2	161_F1	161_F2	161_M1	161_M2	176_F1
ACCORD2_I	4.96482	4.80589	4.9834	4.86594	4.83971	4.81038	4.98881	5.13845	4.56645	4.67438	4.74365	4.62247	4.67489	4.74106	5.0083	5.1307	4.28479	4.21558	4.61325	4.40535	4.87094	4.87151	5.13466	4.79517	4.82022	5.07127	4.45081	4.51253	5.12048	4.7219	4.91522	5.13763	5.17563	5.22884	5.4773	5.50162	4.52109	4.80211	5.19334	4.71021	4.45428	4.81067	4.78863	4.65932	4.52093	4.77164	4.73044	4.89093	4.44056
ACCORD2_LTR	0.336558	-0.461635	0.746351	0.681912	-0.772588	0.705676	0.613032	0.831323	0.610557	0.0723572	-0.518442	0.058086	-0.70133	0.302164	0.31111	0.0924812	-0.836086	0.161511	0.815642	0.797302	0.579076	0.295211	0.2637	0.912267	-1.03981	0.472356	0.654864	0.486429	0.622503	-0.0724969	-0.253029	0.24803	-0.295126	-0.429848	0.566887	0.119671	0.20437	-0.788973	0.852474	0.556561	-0.616816	-0.472784	-0.174685	0.0501586	-1.37022	0.720146	0.970714	1.37236	-0.379629
ACCORD_I	6.53265	6.45014	6.9192	6.82611	5.42792	5.1118	6.51035	6.28679	5.85016	5.89609	6.48152	6.5398	5.85706	6.0401	6.29076	6.45649	6.33699	6.17007	5.87343	6.17153	5.74806	5.99103	6.17558	6.61528	6.04894	6.33707	6.42458	6.29589	5.26546	5.48401	5.93689	6.60271	6.16365	6.11384	6.2495	6.61021	6.53902	5.9423	6.02961	6.65061	5.64779	5.78397	6.16081	6.67188	4.87403	4.80678	4.97623	5.05032	4.56609
ACCORD_LTR	2.12582	1.68367	2.85066	2.73289	1.28443	1.35743	1.972	1.40042	1.79765	1.89449	2.14819	2.13675	2.0622	2.6567	2.25367	2.92139	2.58304	1.74561	2.0465	2.09937	1.71605	1.15267	1.88849	2.04935	1.92107	2.32958	2.87232	2.46363	1.84938	1.34159	1.90091	2.0643	1.96651	2.04968	2.30986	1.80157	2.26231	1.79391	2.11504	2.45815	1.88386	1.52571	1.67829	2.5815	0.796805	1.01544	1.84032	1.54223	1.89899
ARS406_DM	5.94523	5.80853	5.02184	5.11011	5.67068	6.49736	4.67701	4.59062	5.40551	6.29834	5.26276	4.72918	6.0539	5.18511	4.81413	5.57049	7.7005	7.67149	6.121	5.84671	6.28226	5.76979	6.49901	5.62082	6.57341	5.49372	5.22167	6.37987	8.11947	5.43205	5.02733	5.58754	5.56111	5.82876	5.04658	5.29252	6.22674	5.9169	6.42382	5.93312	6.6098	6.63524	4.84439	5.23297	5.9022	6.02804	5.25414	4.96751	5.96851
BAGGINS1	6.33355	6.07112	6.60911	6.57028	6.25471	6.02932	6.58592	6.71711	6.20789	6.01982	6.58317	6.77532	6.29408	6.24284	6.74009	6.4379	6.36103	6.16586	6.85685	6.86902	6.15102	6.09334	6.60744	6.81262	6.54069	6.2576	6.53361	6.33281	6.25697	6.13979	6.62011	6.3016	6.27399	6.29501	6.52714	6.43934	6.50691	6.53434	6.56937	6.79263	6.32741	6.10158	6.57756	6.6854	6.72935	6.40706	6.7304	6.81949	6.15545
BARI_DM	4.15992	4.32155	4.08105	3.89705	3.39501	3.59799	3.3231	3.21632	4.17786	4.23481	3.89623	3.92379	4.10376	3.92787	3.17952	3.72221	6.11555	6.253	5.56742	5.53707	4.17909	3.98063	3.92773	3.18667	4.73338	4.49375	3.69398	4.47724	4.69661	3.8751	3.26325	2.99423	3.32774	3.72482	2.93425	2.31365	6.4266	6.40401	5.99738	6.61963	5.72381	5.72631	6.07455	6.01292	3.43354	4.11167	2.57167	2.65214	3.95078
BATUMI_I	6.36334	6.24277	7.34822	7.40354	6.39154	6.31531	6.94825	7.14253	6.3496	6.18114	6.91085	7.14851	6.70912	6.53322	7.0431	6.89635	6.31255	6.18122	7.54127	7.35923	6.22583	6.03889	7.08013	7.17078	6.33575	5.86795	6.75006	6.73219	6.54364	6.40174	6.96355	6.82821	6.50186	6.44985	7.12408	6.92639	6.69676	6.71973	7.17542	7.19049	6.39221	6.27246	7.5832	7.42319	6.78088	6.52195	7.29998	7.45358	6.86508
BATUMI_LTR	2.24261	2.22118	1.77288	1.69641	2.09975	2.32399	1.90692	2.16204	2.64937	2.72831	2.2423	2.44302	2.52923	2.46172	1.93181	2.16945	2.05477	2.24799	2.1864	1.91233	2.06388	1.87939	1.96647	1.66042	2.74403	2.6213	1.78112	2.04127	2.56804	2.40019	1.98662	1.5829	2.45469	2.4913	2.04689	1.8481	3.19322	3.20869	2.55236	2.29284	2.44013	2.98483	2.27329	1.91422	2.64865	2.3894	2.32174	1.92238	2.36601
BEL_I	5.57544	5.21288	5.29954	5.3249	6.68712	6.66894	6.88805	7.06492	5.5958	5.38181	5.17997	5.58172	6.07245	6.14577	6.03684	6.06588	5.53641	5.36727	4.87815	5.06205	5.83364	5.77586	5.76442	6.08145	6.68787	6.62488	7.2029	6.93687	5.84712	6.28941	6.88109	6.67867	5.26792	5.2802	4.33939	4.45544	6.95802	6.81164	6.45754	7.54238	6.81283	6.70514	6.98279	6.96081	4.60339	4.09913	6.03535	6.09877	8.69646
BEL_LTR	1.72817	1.18909	1.01828	1.02749	2.6846	2.5701	3.30638	3.25151	1.58991	1.79722	0.842865	1.45578	1.92897	1.64026	1.4174	1.72899	1.90895	1.58697	0.877009	0.138819	1.62588	1.57992	1.73356	1.75992	2.44291	2.42578	2.76055	2.77213	2.253	1.88573	3.27465	2.64914	0.604516	0.376674	0.228343	-0.542519	2.60329	2.23437	2.08468	2.74844	2.04428	1.96615	2.05433	2.26408	0.796805	0.845604	1.32203	1.39789	3.90927
Bica_I	4.18098	4.1385	3.96311	3.94163	4.7275	4.51221	4.37208	4.43097	3.86185	3.93288	3.57614	3.83099	4.25987	4.04017	3.88107	3.9213	4.58766	4.35505	4.35742	4.3855	3.9287	4.08854	3.84756	3.52516	3.94827	3.86373	3.76386	3.97637	4.17698	4.02294	3.96539	3.71259	3.76786	3.7449	3.9211	3.54296	3.89747	3.75001	3.94347	3.61459	4.04402	3.87783	4.05997	3.84884	5.10182	5.06724	4.27698	4.09592	4.46941
Bica_LTR	-0.160472	0.430533	0.478038	0.79732	0.81073	-0.101016	0.907305	-0.421311	-0.236684	0.278625	0.373689	0.405712	-0.0241379	0.302164	0.468531	0.0924812	1.05512	-0.0309501	0.57763	0.283084	-0.32697	0.465006	0.491794	-0.560302	0.0960713	0.72012	0.249904	0.396298	1.26461	0.457551	-0.904124	0.177702	0.441131	-0.31452	0.664121	-0.542519	0.619094	-0.137803	0.852474	0.16455	0.256647	1.04049	-0.0678866	-0.0566494	0.874764	1.01544	0.0203107	0.0893692	0.271765
BLASTOPIA_I	6.56505	6.56034	6.60114	6.67349	5.6844	5.67225	6.69315	6.56895	9.55839	9.90132	9.63064	9.68622	5.9402	6.03533	6.06074	5.85492	6.59001	6.47765	6.71859	6.8365	7.35598	7.18735	7.16802	8.02045	6.7633	6.69774	6.77481	6.55606	8.57236	9.362	9.42217	9.42708	5.59714	5.5417	5.99376	6.32061	7.55823	7.52531	6.61457	7.23574	5.43267	5.23753	5.74532	5.83576	6.66772	6.55333	7.14129	6.67625	7.6535
BLASTOPIA_LTR	3.38721	3.25274	3.55297	3.4842	2.22525	1.98526	3.21971	2.90993	6.07089	6.11035	5.85889	5.84522	2.33223	2.53571	2.26802	1.96597	3.34281	3.61977	3.4713	3.58319	4.04635	3.74535	3.77357	4.48688	3.39031	3.0714	3.25856	3.05589	4.85278	5.59214	5.78768	5.30162	2.45469	2.44294	2.6237	3.06041	3.27175	3.22151	2.51868	3.02142	1.55139	1.88817	2.63127	2.81147	2.98378	3.29341	3.68954	3.53036	4.58599
BLOOD_I	8.21628	8.42947	8.66963	8.62573	7.26935	7.76085	7.58635	7.36718	7.26545	7.47973	7.50167	7.41746	6.95597	7.15752	6.96542	6.98528	6.01756	6.28823	5.94234	6.03935	7.96699	7.94509	7.67093	8.40912	7.45548	7.59996	7.5043	7.02786	6.79541	7.26485	7.25737	7.09887	6.69407	6.80662	6.11552	6.63944	6.36972	6.50054	5.79069	6.12111	7.09866	7.30095	6.82109	6.85521	5.66774	5.62181	5.9528	5.57711	7.78771
BLOOD_LTR	3.92547	4.07784	4.14177	4.19153	3.28399	3.67891	3.17895	2.95332	3.32857	2.8943	3.42046	3.22678	3.16438	3.09634	2.72867	2.88718	2.18719	2.71503	2.13708	2.42901	3.89049	3.36026	3.18866	3.7676	4.61834	4.30428	3.49469	3.24851	2.91526	3.56354	3.37342	2.90997	2.76221	2.81634	2.29981	2.31365	3.1831	2.87711	2.33739	2.55583	4.08149	4.20175	3.80985	3.7961	1.98397	1.54573	1.50482	1.54223	3.33484
BS	5.60067	5.48394	5.67849	5.72907	4.93924	5.00601	4.92587	4.85651	5.72743	5.57025	5.38039	5.51168	4.41741	4.60591	3.88573	3.86967	4.52897	4.39869	3.86122	4.13759	5.08065	5.26562	4.44616	5.01588	5.63813	5.49372	5.32236	5.33586	4.59946	4.40718	3.29719	3.34649	4.63862	4.51858	4.11415	4.14662	7.16506	7.26615	7.35113	7.73384	5.59694	5.78666	5.45867	5.6656	4.47786	4.23719	4.17277	4.05238	8.47114
BS2	5.58969	5.23686	5.6515	5.64971	5.5439	5.40526	5.33025	5.3742	5.58182	5.44204	5.60807	5.78835	5.44203	5.52871	5.60672	5.46039	5.52894	5.35747	5.78814	5.87687	5.43612	5.21294	5.7378	5.89155	5.33229	5.07127	5.35329	5.266	5.3139	5.48741	5.61676	5.21429	5.55447	5.41999	5.70192	5.63863	5.45739	5.40964	5.14634	5.48297	5.49301	5.18957	5.72875	5.67815	5.79098	5.41469	5.68378	5.91762	5.63135
BS3_DM	3.88498	3.71782	3.40572	3.4136	3.67352	3.73043	3.07416	3.62463	3.65897	3.67444	3.42381	3.47391	3.68875	3.7372	3.24628	3.16929	3.93151	3.86768	3.46132	3.69059	4.02886	3.78599	3.24711	3.71896	4.2128	4.04883	3.4057	3.37778	3.73986	3.51107	3.28597	3.10259	3.73296	3.66986	3.34924	3.1925	3.63322	3.81913	3.10734	3.36797	3.7619	3.94677	3.40878	3.67615	3.94807	3.52675	3.46086	3.47747	3.49777
BS4_DM	-2.2427	-0.683696	-0.456886	-0.509578	-1.03513	-1.51348	0.0148795	-0.661968	-1.96969	-0.457548	-1.07689	-0.400826	-0.70133	-0.462552	-0.140974	-0.0772746	-1.32048	-1.83462	-0.314627	-0.523382	-1.00396	-2.11474	-0.0579273	0.51658	-1.361	-0.526604	0.128021	-0.556871	-1.41022	-1.24053	-1.70946	-0.236911	-1.87655	-1.69016	-0.21482	0.119671	-0.963991	-0.788973	-1.00792	-0.0279109	-2.19736	-1.69251	-0.174685	-0.0566494	-1.37022	-0.737754	-0.0791234	-0.4336	-0.187218
BURDOCK_I	5.93783	5.87115	5.70585	5.68947	8.31815	8.6947	8.26815	8.45375	7.71291	8.13293	7.50147	7.59163	7.3527	7.44836	6.94211	7.05564	7.84584	7.92011	7.88256	8.07353	8.30558	8.39075	7.73638	8.49797	8.3379	8.26817	8.6041	8.28454	6.95795	7.51679	7.45136	7.45116	7.78951	7.80702	7.32484	7.79077	7.21746	6.97104	6.79244	7.23775	7.38379	7.49183	7.43443	7.27278	8.08753	8.12326	8.13645	7.91733	7.70823
BURDOCK_LTR	1.99874	2.28391	2.12643	1.8778	4.4918	4.85168	4.41367	4.55233	3.77071	3.83825	3.59112	3.73693	3.54437	3.94154	3.28208	3.47592	3.72041	4.18821	3.83826	4.00861	4.55392	4.05567	3.25231	4.21024	4.65215	4.39025	5.00507	4.5626	3.3463	3.99456	4.0868	3.82614	4.10918	3.96633	3.52779	3.463	3.8212	3.03071	2.81535	3.34828	3.39606	3.25717	3.418	3.46071	4.4009	4.23146	4.23101	4.02397	4.35037
Chimpo_I	3.77293	3.32908	3.7759	3.87094	3.62878	3.80443	3.47675	3.56992	3.27904	3.39305	3.5549	3.68484	3.97449	4.05282	4.01474	3.83419	3.12233	3.20477	3.64452	3.58319	4.09757	3.80984	4.23132	4.16254	4.34961	3.99497	3.91585	3.7079	4.03229	3.67504	3.80162	3.17659	3.83523	3.61272	4.16487	3.3704	4.13131	4.18916	4.11103	3.7408	3.71498	3.02182	3.50708	3.61657	3.62617	3.64366	3.63567	3.84068	3.95078
Chimpo_LTR	0.609379	-0.461635	0.633211	0.267174	0.728316	0.598829	0.815725	0.577722	0.0849039	-0.819552	0.650335	0.598221	-0.0241379	0.384561	0.932191	1.05118	-0.474088	-0.378471	-0.247594	0.534433	1.13131	0.465006	0.888882	1.66042	0.80604	-0.526604	0.563775	0.442067	-0.274808	-0.919281	1.14445	0.0258404	0.32093	0.791433	0.462624	0.395075	-0.157843	0.489668	0.174882	0.749084	-0.202332	0.718734	1.12391	1.7337	0.434472	-0.0382399	1.11266	0.991441	-0.187218
Chouto_I	3.96971	3.95793	3.90031	4.11572	4.14786	4.3069	4.36402	4.29845	4.29463	4.3593	4.22872	4.2412	3.75586	3.92787	3.77452	3.68287	5.45468	5.29981	4.13369	4.10883	3.50424	3.76175	3.86802	3.63408	4.22033	3.87229	3.24396	3.49642	4.64993	4.66301	5.10923	5.15375	4.21835	4.37133	3.86426	3.81888	3.78149	3.61075	3.4064	3.21327	3.80734	3.82648	3.88489	3.90684	4.97039	4.6436	4.93222	4.85682	4.02068
Chouto_LTR	2.12582	2.01478	1.61795	1.53949	1.64045	2.21967	1.57115	1.26923	2.28547	2.32503	2.03881	1.70623	2.43409	1.53596	1.85783	1.7796	2.89333	2.33043	1.71796	1.47506	1.62588	1.20155	1.5431	1.17517	2.49353	1.89797	1.82101	1.59123	2.38323	2.18264	2.41537	2.0643	2.22279	1.79102	1.86796	1.59881	1.86648	1.48915	1.50753	1.41173	2.22258	1.52571	2.10086	2.17247	2.58049	2.04155	2.39767	2.17948	1.9408
CIRCE	5.2181	5.2487	5.6962	5.5799	4.86403	5.23732	4.87998	5.10277	5.64061	5.62796	5.97308	6.02251	4.95172	4.74497	4.87868	4.9711	5.1742	4.9449	5.4334	5.44612	5.26745	4.82936	5.55215	5.07504	5.25004	5.16832	5.70549	5.77195	5.88334	5.46	5.26027	5.2745	5.01058	5.1805	5.61034	5.34618	5.19562	5.176	5.27798	5.18844	5.03446	5.0622	4.85461	4.7293	4.99242	4.71522	5.28945	5.46082	4.97609
Copia1-I_DM	4.85379	4.64197	5.77415	5.75607	5.02804	5.23286	6.16843	6.16751	5.09972	5.03237	5.87673	5.981	4.83243	4.82829	5.91673	5.82058	5.3313	5.35747	5.93694	6.01114	5.00218	5.05895	6.20336	6.3243	4.50572	4.40802	5.71081	5.44526	4.73574	4.68685	6.02393	5.99535	4.7329	4.70098	5.65242	5.66648	4.97575	4.81908	5.6383	5.94547	5.45782	5.56651	6.15531	6.16921	5.38097	5.35527	6.34922	6.22179	5.21632
Copia1-LTR_DM	2.2102	2.42973	1.83815	2.18383	2.34071	2.67902	1.79148	1.68412	2.71603	2.47933	2.39351	2.22693	2.67506	3.02106	2.19478	2.33088	2.56368	2.88834	1.97813	1.64493	2.37194	2.76998	1.70351	1.59005	2.86431	3.04135	1.72617	1.72684	1.96482	2.53767	2.28611	1.80911	2.27224	2.73835	1.88151	2.04069	2.90375	2.84432	1.93951	2.33347	2.41099	2.9275	2.10086	2.07464	2.60357	2.56386	2.28222	2.14974	2.20377
COPIA2I_DM	4.37988	4.42258	5.46469	5.49269	4.05792	4.42107	5.11663	5.07358	4.50045	4.78845	5.34194	5.51765	4.39232	4.35826	5.11139	5.20201	4.27292	4.45949	5.56625	5.47458	4.20268	4.14587	5.51695	5.55539	4.41672	4.27875	5.11476	5.16214	4.98002	4.30303	5.32203	5.38786	4.22674	4.38419	5.19633	5.17424	3.96992	4.16281	5.0035	5.11605	4.51032	4.44584	5.34487	5.11797	4.71357	4.50783	5.39512	5.42247	4.40366
COPIA2LTR_DM	1.72817	1.89933	1.9006	1.85134	1.39542	1.54179	1.18858	1.33632	1.37098	1.07167	1.8121	1.68518	1.61872	1.57157	1.39142	1.3141	1.39892	1.33072	1.19878	1.64493	1.88106	1.504	1.763	1.59005	2.30801	1.68122	1.37964	1.52897	1.54991	1.88573	1.80979	1.78565	1.28866	1.65613	1.26953	1.39453	1.07827	1.20916	1.3632	1.35365	1.55139	1.7183	1.16828	1.37125	1.43394	1.71971	1.28252	1.44762	1.27117
COPIA_DM_I	12.827	12.9511	12.7951	12.6022	9.50688	10.3754	10.2702	10.2155	10.819	10.6152	10.4671	10.1679	8.68176	8.83077	8.53914	8.55216	13.1303	13.4775	13.078	13.1379	9.05816	9.01171	8.67056	9.27747	10.2464	10.2971	10.2911	9.83245	10.3816	11.1082	11.0997	11.117	10.4562	10.5925	9.9011	10.7442	10.081	9.95241	9.1034	9.2915	11.7564	12.0956	11.7943	11.7385	11.5336	11.7521	11.5979	11.2493	12.3201
COPIA_DM_LTR	-2.65547	-2.26403	-1.39367	-1.4406	-1.03513	-0.77816	-3.51429	-9.96578	-3.54339	-2.03855	-5.27105	-4.37253	-9.96578	-2.77655	-3.37544	-1.752	-0.184946	0.620591	-0.384926	-2.1042	-9.96578	-9.96578	-3.84589	-9.96578	-9.96578	-9.96578	-3.93847	-2.96274	-3.71689	-0.656701	-3.69537	-0.972743	-3.19056	-3.00513	-3.26149	-2.53623	-2.95557	-9.96578	-4.43862	-3.2381	-2.19736	-1.27864	-1.55059	-9.96578	-2.36649	-2.73055	-9.96578	-2.42777	-3.17577
DIVER2_I	4.72205	4.52998	4.70062	4.87746	4.79991	4.75547	4.68189	4.6043	4.72514	4.54053	4.65803	4.84287	5.02972	4.98507	4.91334	4.75415	4.75918	4.32016	4.95664	4.91477	4.92865	4.70772	5.01896	4.76754	4.83501	4.10076	4.80084	4.59081	4.89706	4.90586	4.87458	4.74329	4.69109	4.63435	4.90457	4.31343	4.92198	4.70044	5.06701	4.98189	4.89409	4.56341	4.80278	5.00964	4.91612	4.49352	4.5999	4.85682	4.76539
DIVER2_LTR	2.95031	2.83775	2.88195	2.66613	2.78994	2.87491	2.87305	2.23417	3.14721	3.1256	2.80677	2.90124	3.01897	3.10852	2.79954	2.91008	2.69405	2.95482	2.61342	2.61774	3.16323	2.93808	2.8883	2.58981	3.12731	2.58008	2.73294	2.62115	2.95769	3.06001	2.91537	2.64914	2.7153	2.77787	2.66344	2.54309	2.91603	2.74124	2.93933	2.8288	3.18848	2.80553	2.69332	2.65103	2.77601	3.0282	2.65139	2.71442	3.16885
DIVER_I	3.9003	3.81659	4.48116	4.66026	7.14282	7.17357	6.99205	6.82397	6.09255	6.11035	5.49553	5.51765	4.55942	4.38852	4.77948	4.5286	7.49673	7.58387	6.27213	6.42293	4.78501	4.7779	5.2509	5.2421	8.12062	7.96017	8.00917	7.64681	7.3637	8.23028	7.72462	7.39754	6.62198	6.5654	6.063	6.13253	6.39186	6.49527	5.36425	5.69857	7.53664	7.27054	6.96167	6.90498	7.14766	6.709	7.26175	6.9032	6.7315
DIVER_LTR	-1.43828	-3.25712	-0.520926	-0.0950538	2.19489	2.59811	2.03427	1.65813	2.06939	0.956251	0.862754	1.12149	-0.0241379	-0.614334	0.417942	-0.0772746	2.56368	2.66824	1.55854	1.56249	0.479609	0.20218	0.777913	0.727947	3.46831	3.80234	3.76044	3.09223	2.85667	3.13126	3.14396	1.87726	1.8627	1.68413	1.22773	1.39453	2.09962	1.40172	0.989905	0.556561	2.6036	1.92769	1.61557	1.91422	1.71395	1.34787	2.24158	1.99108	1.81155
DM1731_I	6.58494	6.62537	7.91277	7.90984	4.39494	4.54855	7.23594	7.33165	5.87538	5.71265	7.65353	7.76532	4.04057	3.82096	7.68265	7.61818	7.22513	6.84147	8.97897	8.92197	5.8586	5.44889	7.61704	8.08103	7.29708	6.78648	7.62374	7.18459	6.74986	7.62874	7.83801	7.68185	7.37271	7.46202	7.15298	7.6228	4.92502	5.15944	6.61523	7.1608	5.25548	4.97057	8.07198	7.92792	4.77585	4.38919	7.50056	7.60749	4.04963
DM1731_LTR	1.60891	1.8587	4.94095	4.8	-0.036609	0.89821	4.34981	4.53459	1.02536	1.41548	4.79631	4.80921	-0.438686	0.737958	5.0587	5.04537	2.79713	3.03076	5.21611	5.43265	1.80092	1.99484	4.56373	4.90069	2.99302	1.89797	4.24633	3.72652	3.0586	3.58907	4.97935	4.48027	2.92569	2.42646	4.2085	4.24118	1.20374	0.794327	4.0534	4.30289	2.00582	0.526214	5.11197	5.19855	1.38149	1.78382	4.93222	4.82189	0.718906
DM176	6.46815	6.40146	6.46105	6.43257	5.67068	5.93638	5.74838	5.77419	5.71932	5.68572	5.63867	5.64986	7.49207	7.71089	8.18694	8.10081	5.89704	5.98997	5.99778	5.77683	6.0657	6.2656	6.47975	5.96984	6.80021	6.64126	7.52784	7.39775	6.72704	6.14625	5.91155	6.26178	5.69711	5.86744	5.98438	5.94458	6.13387	6.20533	6.59113	6.16187	6.58066	6.72069	6.87647	6.87169	6.50871	6.78537	6.27441	6.14661	7.67223
DM297_I	7.5236	7.64715	8.18687	8.38333	7.7757	7.69753	8.54004	8.6222	7.70648	7.76448	7.93453	7.73266	7.63083	7.75318	7.58357	7.7083	7.57134	7.8598	7.7941	7.60383	6.03975	6.46021	6.98185	6.4513	7.54144	7.88495	8.0258	7.84082	7.70671	7.62489	7.67492	7.95779	7.66543	7.74937	7.48034	7.82462	7.62799	7.52853	7.2598	7.41623	6.93813	7.30471	6.92981	6.90587	7.49024	7.81874	7.83054	7.63256	7.27569
DM297_LTR	4.21405	4.19671	4.52741	4.81378	4.04946	3.85173	4.60019	4.69655	4.3852	4.3364	4.24586	4.31159	4.51362	4.47569	4.05668	4.24771	4.18695	4.3402	4.07598	4.02922	3.52933	3.60704	3.53848	3.56239	4.25742	3.9792	4.12413	4.04101	4.43901	4.51101	4.62127	4.66191	4.25162	4.36269	4.10552	4.63202	4.61445	4.53052	3.97278	4.24815	4.10897	4.23363	3.7454	4.10568	3.87408	3.95342	4.19954	4.16072	3.87733
DM412B_LTR,DM412_LTR	5.32034	5.31026	5.13135	5.14458	3.55897	3.73043	3.03409	3.24279	4.91141	4.68801	4.48116	4.53102	4.25059	4.26889	3.75427	3.85794	4.33705	4.72633	3.66641	3.73518	4.42617	4.33303	4.45746	5.00578	4.75428	4.34175	4.50078	4.1724	4.60392	5.44259	4.62573	4.11197	4.94346	4.60901	3.95352	4.22804	4.93712	4.77192	3.9561	4.21046	4.70895	4.6308	4.50701	4.47988	3.81598	3.74376	4.36945	3.84995	4.04963
DM412_I	8.41846	8.68249	8.442	8.48407	6.42463	6.62367	6.31255	6.17096	8.03751	8.13915	7.98899	7.90305	7.16176	7.37089	7.13699	7.20024	7.34551	7.70712	7.05573	7.17788	7.04736	7.1198	6.86878	6.81455	8.34438	8.40943	7.71277	7.34037	7.38685	7.84087	7.73961	7.73562	7.88335	7.9232	7.32948	7.93314	7.75473	7.66093	6.97529	7.19532	7.49905	7.76703	7.27237	7.22513	7.32823	7.47417	7.23613	6.88244	7.38763
DMCR1A	7.92476	7.8775	8.01493	8.11495	7.7967	7.7056	7.91725	7.84138	7.8816	8.01034	8.00753	8.07503	7.71165	7.83513	7.92806	7.8549	7.81086	7.82423	7.83937	7.79836	7.80629	8.01129	7.90512	7.91015	7.77804	7.90907	7.94463	7.88758	7.92044	7.84353	8.06964	8.13034	7.86969	7.99587	8.05497	8.10673	7.90395	7.84153	7.86821	7.99794	7.83836	7.87458	7.82975	7.83107	7.84764	7.9037	7.95199	7.90875	7.85622
DMHMR1	0.609379	0.977683	6.08503	6.0459	0.888689	1.59835	5.50808	5.64453	1.27317	0.693365	6.09527	6.15858	1.29691	1.0722	5.35773	5.47582	4.94274	4.50458	6.30669	6.36938	2.82117	1.84902	6.78697	6.27188	1.39073	1.93113	5.928	5.90353	7.95249	8.58102	6.7646	6.86574	1.57806	1.73856	5.70858	5.81442	1.76154	1.6111	5.58777	5.65013	1.92567	0.966523	5.27557	4.92445	1.98397	1.30482	6.95357	6.92695	2.05941
DMHMR2	0.451947	-0.461635	-0.0740194	0.226566	-1.77013	0.483431	-0.256127	-0.661968	0.195834	-0.627225	-1.73808	-1.59102	0.145624	0.536454	-1.38672	0.566033	0.162626	0.483181	0.0475447	0.797302	0.672125	0.102734	0.748784	1.07568	-0.555234	0.379316	-1.63435	0.529467	1.56828	-0.919281	-0.390361	-0.683751	0.189795	0.983974	0.388678	-0.128007	0.619094	0.650024	0.0546985	-1.83159	-3.19076	-0.472784	-9.96578	-2.74886	2.91164	3.04137	2.28222	2.79348	0.51259
DMLTR5	4.67235	4.54287	3.48122	3.3202	1.8883	1.94221	2.49913	3.07616	0.725962	0.894883	2.24987	2.04056	1.67529	1.67341	2.17968	2.20692	1.44198	1.37023	2.83062	2.86706	1.71605	1.504	2.40961	2.58981	1.3363	0.642166	2.1893	1.52897	1.45436	2.00435	1.93005	1.55543	1.41146	0.842031	1.89492	2.02052	2.09962	2.44584	2.25797	2.66334	0.966671	1.04049	1.76753	2.219	2.14994	2.19089	1.63602	2.08835	4.27882
DMRP1	0.960647	0.899721	1.1057	0.79732	0.728316	1.06805	1.22464	1.30317	0.52815	1.45853	0.165276	0.598221	0.882068	0.673867	0.739654	0.50718	0.262076	0.68468	0.462233	0.697825	0.579076	0.995199	0.560459	1.59005	0.0960713	1.37876	0.821413	0.727279	0.724319	0.564391	0.0945254	1.34692	0.441131	0.738997	0.310737	1.51478	1.16312	0.925499	0.530746	0.556561	0.703784	1.17793	0.516572	1.19624	1.01908	0.653073	0.813258	1.26549	0.134381
DMRT1A	5.12553	4.94824	5.51745	5.55038	5.32301	5.25062	5.49615	5.62118	5.1419	4.7672	5.50268	5.64578	5.32758	5.31948	5.61656	5.32638	5.49612	5.44797	6.09541	6.15287	5.24111	5.12063	5.56892	5.482	5.58952	4.90599	5.64844	5.47446	4.89887	5.25992	5.619	5.53577	5.30206	5.1607	5.71805	5.50888	5.38195	5.59103	5.71589	5.80805	5.08607	5.11022	5.48083	5.45576	5.27355	4.86351	5.43621	5.69634	5.39613
DMRT1B	6.63921	6.3765	6.70583	6.7574	7.17818	7.26267	7.43083	7.67358	6.73834	6.4843	6.6907	6.78772	6.62725	6.53322	6.57169	6.33061	6.54382	6.46516	6.51709	6.34595	6.88434	6.48758	6.73361	6.80972	6.73728	6.14376	6.42458	6.3569	6.18215	6.49248	6.53613	6.0965	6.94024	6.91399	7.14247	7.05902	6.95356	7.13674	6.99175	7.05998	6.6368	6.39735	6.69596	6.81223	8.10836	7.57952	7.98583	7.97967	6.52712
DMRT1C	4.33172	4.02373	3.27039	3.23063	4.17922	4.1549	2.99287	3.27734	4.20132	3.94807	3.09857	3.49221	4.63266	4.27969	3.53444	3.19748	3.78035	3.46413	3.30263	2.98779	4.45919	4.207	3.52566	3.32307	4.7281	4.12245	3.26339	3.24206	4.08747	4.13118	3.4954	3.11205	4.31592	4.25011	3.5534	3.17436	4.61445	4.6204	3.55224	3.15778	4.23903	4.15257	3.34256	3.13639	4.28433	3.49837	3.29205	3.53036	4.04004
DMSAT6	1.58382	1.18909	0.0189951	-0.0444808	0.81073	2.38956	-1.02543	-0.421311	1.79765	2.25349	0.454548	0.807546	2.29662	2.12075	-0.580979	0.244349	3.38754	4.1433	1.12481	0.797302	3.60208	0.995199	2.43726	1.35567	1.72319	1.1724	0.625135	2.94104	3.61728	2.42875	-1.12607	-3.13279	1.92587	1.56869	2.67126	-0.805133	3.59555	3.27169	3.61201	0.749084	3.17121	2.17761	-0.552709	1.24202	2.79618	2.04155	0.200716	-0.0417462	2.09688
DMTOM1_LTR	3.72784	3.9865	2.66165	2.44504	3.94386	4.10697	2.59177	2.64473	3.89511	4.05011	2.67799	2.54003	4.06194	4.26345	2.67582	2.94376	3.39851	3.64415	2.61342	2.69716	3.90013	4.25411	2.31341	2.53468	3.85456	3.98711	2.48244	2.44127	3.3463	3.9059	2.57146	2.8089	3.48284	3.85371	2.30986	2.97912	3.9281	3.53059	1.92244	2.60644	4.01526	4.16088	2.51582	2.41161	3.80606	4.05434	2.57167	2.6415	4.16877
DNAREP1_DM	8.22543	8.19867	8.09706	8.12534	8.14828	8.13823	8.05613	8.0384	8.22514	8.42414	8.09696	8.09936	8.27704	8.3844	8.07788	8.0245	7.95204	8.05618	7.7324	7.89661	8.34277	8.48015	7.95977	8.27748	8.06888	8.31681	8.00322	7.84189	7.72882	8.32069	8.08186	8.15457	8.0379	8.19148	7.72649	8.03815	8.19999	8.29486	7.64154	7.97925	8.23428	8.35358	8.27838	8.16623	7.97478	8.12015	7.90561	7.9664	8.12459
DOC	7.00017	6.82707	7.06879	7.17187	7.49096	6.98226	7.95312	7.71474	6.74576	6.71485	6.79853	6.88788	7.53664	7.64764	7.81408	7.86811	7.37566	7.29209	7.53593	7.58308	8.11157	8.10702	8.1171	8.21857	6.97515	7.00466	7.6053	7.52582	7.82148	7.3335	7.60437	7.65217	7.75223	7.62666	7.95644	7.72139	7.2953	7.12143	7.67058	7.52741	7.26056	7.06216	7.076	7.10793	7.05965	6.92785	7.08067	7.19609	7.21842
DOC2_DM	5.35597	5.27981	5.92223	6.00221	5.58253	5.3569	5.83693	5.6837	5.49636	5.49986	5.81299	5.83091	5.41737	5.5886	5.64158	5.73661	5.52894	5.56113	6.00553	6.10877	5.51045	5.55616	6.00437	5.73528	5.42649	5.15786	6.17433	6.02974	6.31728	5.85412	5.88576	5.69215	5.056	5.08395	5.86929	5.41927	5.69143	5.73659	6.12222	6.05431	5.36969	5.13153	5.47642	5.52453	5.77582	5.57728	6.28943	6.35482	5.54588
DOC3_DM	7.18196	7.03281	7.18688	7.215	6.99864	6.63047	7.20892	7.11114	6.76838	6.85034	6.97421	7.1179	6.97159	7.10987	7.26683	7.13796	6.72141	6.66406	6.87247	6.79348	6.76002	6.9388	6.96809	6.74238	6.94818	6.85719	7.23216	6.97629	6.74229	6.8541	7.16694	7.13354	6.90344	6.87807	7.28432	7.20805	6.89041	6.89704	7.10009	7.20048	7.00669	6.91999	7.14006	7.13927	6.94573	6.9971	6.94332	6.9433	7.02304
DOC4_DM	3.81125	3.74036	4.68828	4.86428	3.77964	3.40537	3.84716	3.74061	3.4171	3.57034	4.46662	4.62799	3.51368	3.92787	3.75936	3.7542	4.01941	3.87456	4.81683	4.88398	3.32957	3.36026	3.83722	3.66008	3.51806	3.60072	4.49051	4.39818	3.75597	3.40005	3.45588	3.73112	3.64182	3.7449	4.15654	4.1697	3.30012	3.62046	3.83363	3.79272	3.4255	3.53816	4.37124	4.34477	3.8356	3.64366	4.71568	4.70661	3.69389
DOC5_DM	4.33549	4.25266	3.4853	3.5515	4.41484	4.2013	3.56025	3.3194	4.62214	4.66981	3.69739	3.91478	4.47431	4.48038	3.71814	4.17395	4.61614	4.39869	3.79121	3.51906	4.43947	4.32201	4.40708	3.25648	4.86896	4.74283	3.19421	3.99568	5.30708	4.43561	3.57134	3.6294	4.57763	4.79065	4.28183	3.35437	4.49269	4.63486	4.394	3.18579	4.28793	4.76776	3.36179	3.49893	4.43347	4.89288	3.96384	3.64138	4.78847
DOC6_DM	5.24435	5.18849	5.41955	5.26851	4.96196	4.99024	5.35791	5.31514	6.89708	7.20028	7.00278	6.89075	5.10886	5.02093	5.43131	5.47198	5.1321	5.1461	5.39458	5.44036	6.6585	6.6339	6.24698	6.69811	3.65777	3.7752	4.45926	4.42976	4.24708	4.1824	4.37335	4.59602	6.36798	6.14314	6.19834	6.5958	5.87714	5.70727	5.50563	5.8215	3.93565	3.95635	4.07753	3.90684	6.4107	6.48867	6.81158	6.40446	4.71808
FB4_DM	7.05024	7.33821	6.84135	6.91744	6.74852	6.67059	6.52488	6.31928	6.75202	7.16009	6.65407	6.45604	6.77045	6.72826	6.63466	6.58744	6.40521	6.56111	6.46558	6.24825	7.19087	7.33022	6.82671	6.97069	6.33227	6.7346	6.4884	6.37102	6.63907	7.0111	6.87079	7.34084	6.51476	6.675	6.13331	6.52417	6.86134	6.81376	6.23367	6.4481	6.76469	7.25411	6.85373	6.65188	7.04391	7.19796	6.60186	6.52519	6.78413
FROGGER_I	1.72817	0.899721	3.06214	3.29587	2.84964	2.96371	2.52827	2.56306	2.3707	2.25349	3.57614	3.71112	2.90532	3.17947	3.28913	3.07112	3.27299	2.98058	3.36286	3.62441	2.73753	2.72052	3.59277	4.28453	1.84514	2.49394	3.65038	3.53916	2.01926	1.84393	3.08041	3.10259	2.55135	2.15349	2.79091	3.24561	2.94027	2.6868	2.89626	3.36308	1.92567	1.84754	3.10069	2.91403	3.99246	3.99464	3.22068	3.03223	2.09688
FROGGER_LTR	-0.000176583	-0.461635	0.188762	0.489395	0.640908	0.220603	0.311596	-0.122113	0.347712	-0.168401	0.258305	0.505175	0.560336	1.21415	0.00326421	0.828905	-0.184946	-0.515787	0.0475447	-0.0214913	0.672125	-0.119434	-0.110339	-0.0304424	-0.193135	0.173036	-0.101233	0.0862206	0.265215	-0.434634	0.679037	-0.236911	0.256852	-0.31452	-0.0515009	-0.542519	1.0339	0.102961	-0.220643	0.251937	0.382077	0.526214	0.516572	-0.756152	1.38149	1.26044	0.970714	0.957511	-0.864305
FW	7.18665	6.88132	7.27113	7.34072	7.35681	7.29084	7.47593	7.50249	7.18201	7.1771	7.3702	7.53942	7.36887	7.47269	7.58106	7.75054	7.47617	7.22632	7.38897	7.35414	7.00103	6.95047	7.54659	7.08863	7.10291	7.04876	7.45234	7.50542	8.09414	7.40802	7.63511	7.62888	7.22144	7.26866	7.77719	7.36428	7.19118	7.38347	7.84292	7.60102	7.35539	7.16908	7.28628	7.37199	7.00544	6.87088	7.18949	7.21551	7.80408
FW2_DM	3.09935	3.17213	4.56066	4.5349	3.44747	3.12642	4.72185	4.52743	3.33465	3.43677	4.47472	4.67681	3.31439	3.50828	4.7233	4.34754	3.36535	3.78968	4.64667	4.70021	3.27128	3.10156	4.64305	4.43764	3.19004	3.25283	4.49668	4.11704	3.68198	3.73345	4.73296	4.78233	3.24758	3.19286	4.43663	4.46294	2.96411	2.86081	4.09589	4.205	3.70301	3.45946	4.48086	4.38614	3.43354	3.76774	4.79855	4.4225	3.60567
FW3_DM	1.75088	1.05165	1.2661	1.28647	1.9979	1.80474	1.7175	1.68412	1.89951	1.79722	1.56744	1.62011	1.67529	1.91435	0.967796	1.80426	2.95408	2.86086	1.64927	1.99847	1.25679	1.99484	2.27307	2.49672	1.84514	1.71968	1.51548	1.96494	2.46395	2.34131	2.04106	1.94234	1.77391	1.71161	1.94738	1.29727	1.49314	1.86101	2.06925	1.37327	1.4404	2.30311	1.95651	1.48985	2.2702	2.2825	2.08962	2.05665	1.20408
G2_DM	3.32045	2.89914	2.63251	2.9036	3.60589	3.95281	1.90692	2.23417	3.48421	3.51022	2.46681	2.35244	4.48225	4.34288	4.22429	4.72539	4.08199	4.1145	3.34125	3.29061	3.66002	3.02213	3.68022	2.79141	4.39691	3.71935	3.0281	3.87573	5.0339	3.71037	2.16878	2.45467	3.21422	3.45911	3.83324	2.04069	3.87878	3.83591	4.33072	2.27209	3.66649	3.53816	2.63127	2.98306	3.79608	3.43988	3.42501	2.98249	3.88805
G3_DM	3.11694	2.87897	2.96612	3.17836	2.9621	3.08743	2.87305	2.95332	3.00211	2.9099	3.0817	3.24128	3.10385	3.3222	2.8951	2.7669	2.60215	2.68401	2.81503	2.82052	2.91934	2.90894	3.07002	3.12579	3.2053	3.19939	2.85961	2.96475	2.84164	2.73356	2.79382	2.42462	2.93595	2.61284	2.76191	2.39425	3.20327	3.15623	2.55236	2.8288	2.75042	2.17761	2.64704	2.78078	3.01854	2.63511	2.77042	3.11151	2.71825
G4_DM	4.96239	5.03741	4.73872	4.85266	5.61156	5.28549	4.94356	4.93976	5.31624	5.44204	5.15095	5.01727	4.91108	5.27966	4.95607	4.86083	5.0158	4.98999	4.81291	4.9203	4.97047	5.18282	5.04465	5.4451	4.96625	5.31998	4.77231	4.62097	5.00889	5.32595	4.64343	4.86857	4.84339	4.85366	4.44121	4.56744	5.33472	4.98619	4.30461	4.80175	5.09526	5.24928	5.04215	4.98629	4.74504	4.9844	4.6857	4.59242	5.11039
G5A_DM	4.91792	4.80589	4.82337	4.93372	4.95291	4.73669	4.82527	4.73746	5.13843	5.10191	5.06985	5.09117	5.03513	5.02736	4.8263	4.70916	4.63481	4.58655	4.8819	4.91753	5.05064	5.15826	5.13466	5.51085	5.07412	5.30424	4.86425	4.71718	4.59275	5.0182	4.9512	4.90711	4.75337	4.83504	4.76358	4.94995	4.78144	4.62524	4.47526	4.71982	4.85134	4.98469	5.18398	4.99634	5.0773	4.75575	5.28446	5.20473	5.11039
G5_DM	4.97691	4.85319	4.80226	4.99091	4.73807	4.76168	4.71553	4.68373	5.06544	4.87044	4.89739	4.95046	4.91108	4.8023	4.73109	4.62516	4.73341	4.57813	4.66636	4.7445	4.75874	4.5933	4.59066	4.84512	4.95275	5.03741	4.94617	4.78313	4.83771	4.66301	4.76969	4.64572	4.86772	4.65926	4.75625	4.56047	4.89433	4.96728	4.63833	4.66913	4.70895	4.59443	4.72321	4.69679	5.30204	4.99798	4.71938	4.7568	4.90922
G6_DM	2.39458	1.89933	0.662339	0.62055	2.66258	2.67902	1.80344	1.60471	1.72553	1.76329	1.06514	0.685628	2.99694	2.7056	0.654817	0.780024	2.87774	2.68401	2.64904	2.4597	2.86124	2.87919	2.24204	1.07568	2.72297	1.6417	0.249904	1.52897	2.78778	2.1487	1.53424	0.855295	1.84101	1.23179	1.53246	-0.040637	3.06679	3.01607	2.66953	1.39263	2.55114	2.69536	0.981957	0.76582	1.71395	2.06754	0.970714	0.922764	1.76576
G7_DM	-2.2427	-1.68138	-1.97674	-4.86139	-1.03513	-2.09638	-2.30135	-9.96578	-0.972517	-1.625	-2.00015	-2.80763	-0.70133	-0.199849	-0.803012	-1.26796	-2.05505	-1.25138	-2.1175	-3.09801	-0.741404	-1.70127	-1.69219	-1.72757	-0.0412973	-3.51213	-2.147	-2.96274	-0.733585	-3.23034	-1.70946	-2.13913	-1.6144	-1.20607	-2.84991	-2.12329	-0.505327	-0.426957	-0.298553	-1.13313	-1.20067	-0.110659	-2.28474	-2.74886	-0.786497	-1.73535	-1.29949	-0.625966	-0.864305
G_DM	2.78408	2.58724	-0.225854	-0.0950538	3.1793	3.06753	0.0949727	0.462326	2.56921	2.54072	0.0311002	-0.400826	3.45026	3.07168	0.697859	1.4136	3.29664	3.35019	1.44154	1.21213	3.13082	2.177	1.47358	-0.560302	3.71221	2.47158	0.625135	1.52897	3.71533	2.77864	-0.127642	0.315089	3.59075	3.51475	2.43454	0.119671	3.61074	3.69591	2.82457	1.18626	2.75042	2.55099	0.124569	0.490364	3.48416	2.88939	-0.185921	0.735242	3.00114
GTWIN_I	4.6842	4.52998	4.53923	4.46244	4.62303	4.56283	3.55318	3.56294	3.87858	3.82186	3.1399	3.41758	4.24126	4.0778	3.44884	3.19748	4.71598	4.68384	4.75484	4.66442	5.84367	5.99796	4.24182	4.00244	5.26104	5.22624	5.35442	4.92889	4.14674	4.31838	3.60787	3.46934	4.64176	4.67679	4.1759	3.78938	4.60311	4.47806	3.47824	3.42549	4.30387	4.28779	3.21086	3.43137	3.34044	2.76784	3.61196	3.42257	4.33477
GTWIN_LTR	1.10867	1.8587	1.4275	1.34455	1.22556	1.14602	0.0949727	0.26983	1.24765	1.12609	0.579992	0.505175	1.29691	1.16837	0.31111	0.31468	1.87794	1.88853	1.75112	1.79689	3.17917	2.8334	1.40055	1.4381	2.0619	2.11551	2.073	2.01122	1.84938	2.37105	0.87157	0.555919	1.41146	0.890913	1.04724	0.330994	1.70606	1.40172	0.57511	0.118788	1.49696	1.57632	0.516572	0.330021	1.21164	0.261043	0.505331	-0.112061	1.20408
GYPSY10_I	5.19344	5.03741	5.14561	5.07909	5.36453	5.3569	5.34875	5.32756	5.13496	4.97422	5.35955	5.40948	5.14436	5.29305	5.3255	5.29628	4.83785	4.56967	4.71338	4.86691	5.48503	5.72451	5.4484	5.67918	4.64097	4.86368	4.79418	4.78757	4.73167	5.05531	4.92611	5.14225	4.69109	4.90216	4.93249	4.87889	4.62944	4.94426	4.75621	4.95447	5.00062	5.20975	4.97504	4.75322	4.77585	4.73157	5.1995	4.99912	5.04
GYPSY10_LTR	1.96028	2.15561	2.40155	2.42723	2.47313	2.35715	2.46939	2.73451	2.12652	1.79722	2.66672	2.95501	2.78196	2.04677	2.42995	2.70278	2.18719	1.55303	2.25735	2.68422	2.28623	2.59805	2.84766	2.89719	1.88361	2.05663	2.1893	2.27419	1.78799	2.00435	2.66109	2.34663	2.06334	1.44321	2.23799	2.39425	1.7885	2.04538	2.388	2.32342	2.6036	2.14445	2.66263	2.39143	2.24106	1.61786	2.75607	2.92219	2.39637
GYPSY11_I	3.37995	3.51051	3.56459	3.62755	2.19489	2.06771	2.59865	2.40015	3.17456	3.11218	3.43714	3.28392	2.0622	2.38373	2.90432	2.81623	3.26102	3.09113	2.94966	3.04963	3.21053	3.64288	3.65297	3.42765	2.84494	3.62118	3.17895	3.14853	2.33039	2.71048	2.94422	3.07384	3.4402	3.56833	3.17873	3.44798	2.20343	1.9865	2.53	2.49444	2.65422	2.98483	2.99379	2.85632	2.53319	2.93245	3.22068	2.93968	3.27072
GYPSY11_LTR	1.75088	2.01478	1.87594	2.01527	1.39542	1.21998	1.43929	1.49154	1.50628	1.79722	1.706	1.88306	1.83278	1.67341	2.0528	1.05118	0.99856	0.804902	1.17454	1.31642	1.5297	1.57992	1.55997	1.75992	1.22087	1.79366	1.57888	1.44154	0.586903	1.45703	1.57171	1.5829	1.62957	1.68413	1.5664	1.95825	1.61862	1.10229	1.2308	1.31359	1.8408	1.41884	1.61557	1.79641	1.48455	1.30482	1.50482	1.7547	1.56651
GYPSY12A_LTR	3.77293	3.91894	3.68657	3.82747	3.473	3.8164	3.4655	3.71563	3.60471	3.48961	3.53024	3.71112	3.71597	3.57997	3.37783	3.28767	3.90097	3.65219	3.71344	3.77843	3.43954	3.8333	3.80574	3.95424	4.01908	4.00279	3.91892	3.86737	3.97491	3.49765	3.4357	3.72497	3.40368	3.61999	3.38296	2.96863	3.5647	3.55105	3.71968	3.71796	3.33531	3.76236	3.54122	3.72533	3.8356	3.92527	3.88028	4.04432	3.66923
GYPSY12_I	4.69888	4.7403	6.22033	6.19213	4.73807	4.59794	6.1811	6.17783	4.54827	4.64207	6.26461	6.5609	4.63266	4.65653	6.31861	6.02057	4.46779	4.25833	6.49218	6.41414	4.94273	4.64724	6.5234	6.32701	5.48394	5.19587	5.85705	5.97046	5.40488	5.23588	6.17154	6.04928	4.54111	4.45904	6.06448	6.06273	4.64796	4.45109	6.04448	6.26984	4.21394	4.30289	6.18396	5.84506	5.60907	5.85605	6.24516	6.49742	4.66294
GYPSY12_LTR	4.5834	4.8635	4.06751	3.95101	4.25477	4.55571	4.21964	4.08585	4.78625	4.63739	4.06883	4.22305	3.80739	4.17939	3.98898	3.82819	4.75491	4.84677	4.47868	4.36943	4.97047	4.97708	4.51914	4.37624	5.02765	5.00664	4.19919	4.10997	4.63476	4.60787	3.9794	4.03449	5.1778	4.99452	4.49065	3.76534	4.74405	4.42915	4.25434	3.9899	3.97601	3.91763	3.93712	3.90684	7.15647	7.15769	4.31664	4.22631	5.57935
Gypsy1-I_DM	4.12557	4.00524	2.90651	3.03286	6.71414	6.98624	6.34105	6.23389	6.08086	6.04652	5.38212	5.47994	6.69551	6.60586	7.24478	6.72938	5.06483	4.94817	4.81683	4.81444	8.15856	7.53662	7.52688	8.15677	5.70946	5.42263	5.73884	4.97633	6.0722	6.69271	6.61675	6.2393	7.188	7.12664	6.49996	6.80559	6.06801	5.909	5.57417	5.96176	6.33906	5.83942	6.29068	6.05841	4.71357	3.95342	5.35521	5.10559	6.33472
Gypsy1-LTR_DM	0.880519	0.899721	-1.80745	-0.20185	2.13216	2.10722	0.470172	0.877102	0.932296	0.0723572	0.531115	-0.00896216	2.10401	1.73753	1.85783	1.85234	0.442506	0.161511	-0.314627	-0.648724	2.52945	1.65205	1.763	1.26824	1.0954	1.32987	1.12736	0.349028	1.58642	2.07833	1.19334	0.899665	1.75084	0.443737	0.350234	-0.128007	1.24325	1.15671	0.174882	0.251937	1.04463	0.966523	0.647729	0.827185	1.01908	0.348435	0.505331	-0.4336	1.27117
GYPSY2_I	5.46129	5.32525	4.65425	4.7861	6.01069	5.91427	4.47482	4.52743	5.69474	5.45539	4.78593	5.05674	5.8903	5.87355	4.83597	4.65258	5.4833	5.47314	4.65545	4.81741	5.90726	5.74939	4.68594	4.64708	5.20138	5.43135	4.66135	4.5522	5.30844	5.77845	4.79762	4.83754	5.34121	5.3756	4.53203	4.32581	5.90512	5.82116	4.67191	4.78353	5.53075	5.43557	4.78151	4.90324	5.73721	5.61962	4.83315	4.95251	5.86101
Gypsy2-I_DM	6.11242	6.07112	6.54848	6.50811	6.94035	7.2373	6.19764	6.03747	4.97501	4.7543	4.93897	5.01094	5.42564	5.43515	5.06282	5.08364	6.32123	6.46288	6.49524	6.5883	5.36822	5.14582	5.39886	5.09105	4.70681	4.5103	4.90347	4.88607	5.81093	5.65696	5.79364	5.56706	5.03705	4.98611	6.46666	6.73307	4.96693	5.06656	5.14266	4.77434	5.39967	5.58207	4.79925	4.76502	6.52693	6.34599	7.19615	7.01206	5.01086
GYPSY2_LTR	1.36572	1.58748	1.247	1.47161	2.28413	2.29005	0.993417	0.784044	1.79765	1.86279	1.37313	1.48043	2.2601	2.30129	1.44293	1.34803	2.13567	1.37023	1.04685	1.17562	2.25648	2.65182	1.06464	1.69435	0.54317	1.1724	1.03994	0.0862206	1.43447	1.51145	0.746111	0.713359	2.06334	1.79102	1.07107	0.119671	1.9643	2.07395	0.922826	1.16391	2.28816	1.11084	1.55	1.37125	1.75576	1.96065	1.60432	1.63101	1.9408
Gypsy2-LTR_DM	3.27416	2.56216	2.93662	3.26612	3.38159	2.78029	2.72359	2.64473	2.77082	2.83018	2.59719	2.48017	2.99694	2.36356	2.55227	2.24344	2.39865	2.6034	2.56763	2.60406	2.64873	2.63412	2.47333	2.57167	2.30801	1.79366	2.09486	2.01122	2.78778	2.906	2.82518	2.62292	2.4689	1.98361	2.75457	2.33013	2.42578	3.08785	2.35021	2.52983	2.8406	2.52546	2.37145	2.35022	3.29862	2.73579	3.48716	3.49532	3.02077
GYPSY3_I	3.96	3.78441	3.31234	3.29095	3.6401	3.67891	3.52092	3.26878	4.56387	4.3364	4.02537	4.34217	4.1444	4.11448	3.65947	3.64924	4.08199	3.89503	3.57678	3.47467	3.80061	3.70354	3.63716	3.36582	4.43626	3.87229	3.81083	3.49642	4.13754	4.2797	3.62579	3.52705	3.82974	3.60541	3.70581	3.57098	4.52511	4.54079	3.79664	3.6672	4.14482	4.59443	3.66252	3.61657	4.16529	3.8524	3.64349	3.70922	4.115
GYPSY3_LTR	1.03656	0.315145	0.478038	0.556462	1.033	-0.29344	0.439821	0.735164	-0.857257	0.541461	0.480525	-0.0792789	0.145624	0.914736	1.39142	1.16977	1.26147	1.0678	-0.384926	0.283084	0.672125	0.938644	0.178884	0.660874	0.0960713	0.931504	0.594782	0.249574	0.657246	1.14903	0.456795	0.177702	0.703989	0.376674	0.566887	0.571826	0.619094	0.402269	0.116041	0.623631	0.884252	1.3034	0.931357	0.701729	0.874764	0.58273	0.434992	0.320494	-1.18558
GYPSY4_I	6.34386	6.26626	6.50894	6.5447	6.09738	6.06236	5.969	5.83344	6.19876	6.2924	6.29008	6.38519	5.9257	6.11593	6.04624	6.0697	6.39292	6.30107	6.32195	6.28299	6.02439	6.34934	6.30316	5.98877	6.26102	6.52797	6.61621	6.36509	6.29125	6.13762	6.16695	6.16627	6.2495	6.3342	6.58571	6.38021	6.09526	5.9228	6.30538	6.26984	6.05812	6.06661	5.91443	6.01292	6.22784	6.29878	6.20873	6.31266	6.2163
GYPSY4_LTR	2.25855	2.51064	2.32164	2.45386	1.96228	2.45229	2.03427	2.36845	1.88302	2.4369	2.14819	2.46789	1.49847	1.85778	2.03612	1.7796	2.42034	2.46426	2.14957	2.26492	2.31537	2.04927	2.36231	1.4381	3.04486	2.81137	2.87864	2.27419	2.05878	2.34131	2.45601	1.76181	2.36635	2.19301	2.45279	2.17452	2.20343	2.10195	2.23049	2.2616	2.46869	1.84754	1.87853	1.99666	2.64865	2.26014	2.68208	2.33292	2.66935
GYPSY5_I	3.20182	3.28376	2.77267	2.80362	3.03248	3.21952	2.64595	2.10547	3.46219	3.73698	3.52088	3.3456	3.46638	3.41334	2.58703	2.88718	3.72041	3.66018	3.31377	3.02931	3.6937	3.89404	3.22613	2.8377	3.17461	3.30435	2.60933	3.12065	4.56099	3.92608	3.44582	3.92068	3.4184	3.5608	2.97904	2.90403	3.69864	3.40131	2.88749	2.76339	4.68481	4.75683	4.44974	4.59462	3.65959	3.77564	3.13453	3.20846	3.84466
GYPSY5_LTR	-1.66002	-1.68138	-1.27849	-1.72923	-1.03513	-0.101016	-1.65186	-2.11741	0.141435	-0.305743	-0.625198	-0.593199	-0.216573	-1.7815	-1.21721	-1.26796	-0.643763	-0.0309501	-0.247594	-1.29951	-0.00540353	-0.53395	-1.40353	-1.4066	-2.3573	-0.940949	-1.1502	-0.649839	1.49335	0.663862	-0.390361	-0.336325	-0.616612	0.0720805	-1.39712	-2.12329	0.121981	-3.58145	-1.29678	-2.50659	1.1186	1.52571	1.16828	1.14895	-0.564461	-0.153594	-1.56181	-1.43165	-0.379629
GYPSY6A_LTR	2.43722	2.12167	2.71128	2.60408	2.3127	2.42127	2.75475	2.53478	2.14045	2.32503	2.64391	2.91939	2.78196	2.21384	2.87649	2.09147	2.86197	2.01856	2.53944	2.61774	2.45284	2.6162	3.00376	2.72729	2.92088	2.19955	2.66152	2.67963	3.25285	2.66318	2.9725	2.55518	2.59087	2.64169	3.1056	2.54309	2.80158	2.6868	2.88749	2.99633	2.6036	2.30311	2.46336	2.35022	3.11807	2.68633	2.30211	2.78383	2.76555
GYPSY6_I	5.04051	4.65389	4.55096	4.43819	4.26211	4.27255	3.29794	3.20739	4.89712	4.61853	4.24586	4.2484	4.94023	4.93468	4.03166	3.8755	4.66692	4.56967	4.04957	3.84388	5.06358	4.98058	4.3621	4.16254	4.90212	4.93897	4.57068	4.40397	5.23416	4.97527	4.25744	4.12137	4.98113	4.91403	4.41118	3.99463	5.09123	5.00855	4.54104	4.04599	5.22231	5.03531	3.95623	4.14838	4.95701	4.83732	4.04282	3.97393	4.91447
GYPSY6_LTR	1.5583	0.537372	0.228256	1.11908	3.1793	3.67891	2.14188	2.26893	2.45118	2.47933	1.45402	1.76762	2.18417	2.02124	1.60998	1.38119	1.26147	2.01856	1.12481	0.797302	3.28608	2.93808	2.85451	3.25648	2.39045	2.02626	2.14809	2.09955	1.77223	2.1487	2.41537	1.92097	2.91534	2.75164	2.07073	1.91519	2.09962	1.40172	1.61768	1.60668	2.38125	2.07575	1.4457	1.04946	2.14994	2.44993	1.6974	1.85025	2.87742
GYPSY7_I	5.46987	5.2913	6.26374	6.2072	4.52269	4.10697	5.03903	4.77421	5.3421	5.43667	6.1484	6.29425	4.26909	4.34803	4.9715	4.78853	5.5164	5.39148	6.07592	5.89242	4.5661	5.1427	5.8092	5.26486	4.70681	5.07499	6.01582	5.70195	4.84526	4.53748	5.51947	5.44886	5.1778	5.16319	6.03676	5.91347	5.1047	4.9287	6.07666	5.99776	5.01522	4.98	5.06287	5.26659	4.33348	4.37365	4.40669	4.3847	4.94047
GYPSY7_LTR	1.10867	1.31456	2.00661	1.82438	0.448395	-0.515538	0.884949	0.632134	1.05509	1.3711	1.95791	1.68518	-0.438686	0.0223066	0.365514	0.566033	0.814234	1.01891	1.59552	1.47506	0.131968	0.995199	1.2213	0.59053	0.54317	1.47184	1.78112	1.48591	0.724319	0.564391	1.37384	1.40963	1.1188	0.938194	1.75479	1.33042	0.493649	0.572073	1.57463	1.18626	1.04463	0.303989	1.07813	1.24202	0.212258	-0.568096	-0.185921	0.150713	0.51259
GYPSY8_I	3.97455	3.67165	3.15728	3.31051	3.81001	3.51227	3.31477	2.99544	3.84067	3.46871	3.26848	3.41758	4.15438	3.92098	3.391	3.30505	3.62089	3.28965	3.69651	3.42887	4.02004	3.57956	3.50403	3.24508	4.4871	4.24618	3.51914	3.38951	3.31944	3.37091	2.88593	3.14006	3.95112	3.89023	3.35411	3.04052	3.83419	3.74114	3.60133	3.59383	3.66649	3.48617	3.50708	3.24156	3.99246	3.63499	3.65127	3.82665	3.84466
GYPSY8_LTR	2.07272	2.37316	1.83815	2.42723	2.3127	2.06771	1.85035	1.65813	2.39416	2.4369	2.01234	2.49234	1.83278	1.79891	1.83873	1.70301	2.13567	1.48266	1.84625	1.84418	1.75911	1.99484	1.41916	1.88274	2.78525	2.51596	1.9938	1.96494	1.39385	2.18264	1.87118	1.94234	2.10033	2.15349	1.70994	1.91519	1.84095	1.9865	1.55261	1.65557	2.28816	2.57608	1.95651	2.02312	1.62652	1.11848	0.636487	1.65237	1.20408
GYPSY9_I	2.47863	2.0513	2.81219	2.77574	1.49847	1.75584	1.74258	1.92109	2.20818	1.95588	2.46681	2.65278	1.49847	2.30129	3.19463	3.10128	2.54405	2.31026	3.44114	3.52633	2.02913	1.6868	3.04028	3.37631	2.65789	2.08637	2.48244	2.62115	2.00584	1.51145	1.93005	2.36257	1.92587	2.09211	2.42532	2.33013	2.09962	2.3322	2.53	2.48545	2.18864	2.24172	3.07761	2.70106	2.29877	2.11815	2.82645	3.01584	1.61896
GYPSY9_LTR	1.14342	1.25319	1.18813	0.824785	1.033	0.805153	0.613032	0.462326	0.394981	0.37166	0.579992	0.685628	0.145624	0.536454	0.697859	0.921964	1.10954	1.20524	1.42108	1.31642	-0.32697	0.20218	0.777913	0.968821	0.80604	-0.0677393	0.325791	0.0273835	-0.486037	-0.242232	-0.253029	0.555919	1.00638	0.30634	0.947751	0.729267	-0.642626	-0.137803	-0.00936865	-0.442458	1.18896	1.04049	0.372288	0.9426	0.0868401	-0.153594	1.11266	0.37292	-1.18558
GYPSY_I	5.73916	5.69772	5.43229	5.3838	5.25841	5.22839	4.6019	4.53816	4.81043	4.80105	4.62639	4.71626	5.32758	5.29838	4.9627	4.89853	6.61256	6.51889	4.82853	4.9422	5.25997	5.13013	4.6763	4.81073	5.12317	5.25599	4.59772	4.47449	5.10798	5.20318	4.82115	4.81744	7.07177	7.17986	6.09532	6.3492	5.06114	5.01593	4.30461	4.19951	5.48254	5.29909	5.10913	4.93145	5.18833	4.82594	5.29194	5.32604	4.87728
GYPSY_LTR	1.90059	1.97732	1.32193	1.3634	1.28443	1.54179	0.815725	-0.314534	1.02536	0.179174	0.673041	0.845998	1.36727	0.737958	1.39142	0.62258	3.44158	3.16038	1.24607	0.93473	1.13131	1.42386	1.17825	1.72751	2.19019	1.42605	0.922641	1.22298	2.13471	1.40046	1.33079	1.17706	3.04431	3.00579	2.21677	1.8481	0.619094	0.309233	0.888079	0.778814	1.60384	1.36227	1.58316	0.886047	1.21164	1.16737	1.24189	1.54223	1.05976
HELENA_RT	3.51213	3.40158	3.86002	3.92587	3.82991	3.40537	3.21524	3.04642	3.75721	3.87049	4.04509	4.2484	3.16438	3.25808	2.97601	2.47605	3.66698	3.56973	3.53931	3.72258	3.3718	3.73709	3.49529	3.50618	2.99302	3.18572	3.88796	3.48553	3.34097	3.93606	4.0868	3.70636	3.35094	3.34094	3.82274	3.72227	3.74066	3.92483	4.08058	4.02444	3.38111	3.30297	3.38077	3.90684	3.28441	3.58189	3.52997	3.67309	3.76544
HELITRON1_DM	-2.65547	-9.96578	-9.96578	-9.96578	-1.35632	-9.96578	-9.96578	-9.96578	-9.96578	-9.96578	-9.96578	-9.96578	-2.01974	-1.7815	-9.96578	-9.96578	-3.62807	-3.81927	-9.96578	-9.96578	-9.96578	-2.69658	-9.96578	-9.96578	-9.96578	-9.96578	-9.96578	-9.96578	-3.71689	-9.96578	-9.96578	-9.96578	-4.17744	-3.99359	-9.96578	-9.96578	-2.95557	-3.58145	-9.96578	-9.96578	-2.19736	-9.96578	-3.85572	-9.96578	-9.96578	-2.73055	-9.96578	-9.96578	-9.96578
HETA	5.43172	5.22492	5.89718	5.97795	5.42792	6.0548	6.1999	6.40283	6.22679	6.19393	6.53672	6.52284	5.64685	5.6293	5.82142	6.10981	5.35683	5.40818	6.52789	6.50062	5.6656	5.33573	6.41168	6.60081	6.62824	6.58377	6.72706	6.69132	6.22259	5.68978	5.8783	5.76141	5.78492	5.64149	6.12338	6.25845	6.12993	6.23567	6.33309	6.13698	3.00564	2.44604	4.88817	4.84879	9.32172	9.40211	8.55053	8.6194	5.09658
HETRP_DM	4.12991	4.40857	2.91863	3.18367	3.25484	3.75552	1.66598	2.00596	3.79294	3.9098	3.43049	3.17486	2.2601	2.25823	2.17968	2.57966	2.44171	2.35033	2.87642	2.41341	3.75879	3.86399	2.56809	2.62543	3.84484	4.06386	2.67609	3.2677	3.45397	2.86478	0.287002	1.24742	3.3586	3.2218	3.07646	3.32999	4.26209	3.95586	-0.298553	-0.191233	3.44	3.84724	3.20022	3.31837	2.77601	2.90389	2.71213	2.72454	4.23748
HMSBEAGLE_I	7.3084	7.45013	8.16303	8.10885	5.98208	5.85456	6.07587	6.10636	5.86178	5.87042	7.45186	7.4711	6.36887	6.43029	7.00773	7.11597	6.25487	6.76108	7.0607	7.14462	7.05061	7.01685	7.22862	7.65621	6.16083	5.79552	7.03183	6.70663	6.3495	6.37813	6.67277	6.82462	6.53094	6.68457	6.90536	7.15293	6.8333	6.81482	7.0543	7.22667	6.17757	6.09726	7.08687	7.13548	6.7385	6.69135	6.3006	6.18835	9.14262
HOBO	5.34854	5.37291	5.24883	5.34283	4.80494	4.85168	4.54423	4.4348	4.72283	4.66981	4.35695	4.50422	4.28735	4.20229	3.63753	3.7668	4.85786	5.14895	4.91519	4.91753	4.87094	5.03555	4.60495	4.70233	4.77489	4.74749	4.54312	4.31759	4.56557	4.58901	4.79367	4.88245	6.00691	6.0813	6.09314	6.21584	6.67616	6.74992	5.86962	6.46592	5.27582	5.36894	5.21075	5.32891	4.75022	4.84485	5.14546	5.30595	4.57275
IDEFIX_I	6.48179	6.6642	7.46156	7.42557	6.56184	6.8531	7.52983	7.46082	6.86071	7.13377	7.72641	7.5139	6.85858	6.97343	7.72943	7.81943	6.6994	6.671	7.48264	7.36634	6.01332	6.6171	7.39767	7.00236	6.05527	6.50751	7.19121	7.1753	6.64989	6.46171	7.0357	7.21974	7.78348	8.09014	8.98651	9.0358	6.65617	6.73323	7.12548	7.41001	6.43627	6.55392	7.25383	7.0994	6.78215	7.02638	7.37057	7.21954	7.12969
IDEFIX_LTR	4.42294	4.52998	4.94688	4.95096	4.06633	4.22843	4.92451	5.1408	4.49774	4.56043	5.09949	5.2303	4.56691	4.886	5.05042	5.45262	4.48847	4.57391	5.02601	5.01891	4.01116	4.39214	4.94544	5.11631	4.15107	4.12245	4.6205	4.75621	4.53086	4.42146	4.75348	5.14916	4.79908	4.94329	5.55013	5.76223	4.50086	4.33789	4.91781	5.25606	4.13594	4.39741	4.81329	4.91034	4.50876	4.82974	4.97932	5.04225	4.888
I_DM	5.23229	5.14692	5.53034	5.63718	5.64001	5.1311	5.65981	5.51116	5.63693	5.84021	5.47145	5.44122	5.30535	5.37847	5.5782	6.4379	6.14516	6.13466	5.94054	5.3694	5.69084	5.71823	6.77121	5.82034	5.15497	5.21282	5.54904	6.02034	7.23413	5.65997	5.74937	6.11426	5.368	5.79063	6.75069	5.9419	5.38195	5.80422	6.89499	5.68685	5.48604	5.64862	5.4133	5.20434	6.03121	6.36838	6.25795	6.08312	5.37723
INVADER1_I	4.82732	4.71207	5.18628	5.17957	4.73279	4.77401	5.0466	5.01591	5.01527	4.88629	5.25337	5.30811	4.49016	4.4376	4.62359	4.66273	4.71159	4.7187	5.30532	5.33877	4.09757	4.36019	4.57622	4.50133	4.4871	4.47701	5.22415	5.10816	4.86769	4.80051	4.76565	5.00175	4.52759	4.6663	4.971	4.90664	5.17278	5.43188	4.94765	5.2361	4.74443	4.72354	4.76354	4.89967	4.29146	3.99464	4.70451	4.87284	4.65669
INVADER1_LTR	3.23442	3.10423	3.34414	3.59601	3.0831	2.85183	2.90673	2.69672	3.42851	3.34797	3.33761	3.40476	3.04066	3.5535	3.05262	2.8756	3.10904	3.14907	3.30821	3.33267	2.73753	2.76998	3.0759	2.66019	2.78525	2.99506	3.16868	3.41268	3.73986	3.58907	3.50511	3.22969	2.85169	2.96071	3.08233	2.81314	3.45959	3.35551	3.09977	3.26145	3.20555	3.12741	3.33284	3.32902	3.08565	3.50789	3.13453	3.39114	2.91985
INVADER2_I	6.3661	6.3729	6.49078	6.5718	6.38987	6.07238	6.38004	6.12782	6.39317	6.3564	6.34148	6.30032	5.89328	6.10382	6.15642	6.26218	5.99425	5.82913	6.19215	6.01631	5.81845	6.33297	6.38531	5.88789	5.9184	6.3616	6.20291	6.03535	6.52554	6.23181	6.33569	6.67788	6.19711	6.41997	6.41113	6.40571	5.83573	5.85447	6.32824	5.89461	6.05577	6.16082	5.94185	5.89249	5.82329	6.28361	6.11061	6.1046	6.13759
INVADER2_LTR	3.2584	3.32908	3.06759	3.28107	3.11588	2.89763	3.03409	3.09565	3.01729	3.17806	2.83221	3.06505	2.78196	3.27977	2.48013	2.91008	2.81362	2.78979	2.82285	2.74778	2.67145	2.6693	2.92782	2.64291	2.86431	3.25283	2.86598	3.02614	3.10967	3.02302	3.48562	3.05434	2.93595	3.06023	3.13417	3.02034	3.08864	2.77643	3.05348	2.93164	3.17121	2.94686	3.04228	2.84152	2.67067	3.0149	3.24143	2.57592	3.0781
INVADER3_I	4.47503	4.5235	5.02744	5.01942	4.38824	4.29839	4.99012	5.08825	4.11573	4.1121	4.68342	4.83094	4.00791	4.27969	5.27666	5.02977	4.63481	4.52223	5.04452	5.06455	4.60202	4.3385	5.41634	5.25068	3.9663	3.97125	4.59004	4.49092	4.73574	4.73339	5.35194	5.50199	4.24337	4.27794	4.66131	4.78635	4.78144	4.70501	5.08054	5.09256	4.08149	3.95635	4.84781	4.74131	4.70825	4.60863	5.39048	5.36539	3.77703
INVADER3_LTR	0.999102	0.817304	1.35798	1.30609	0.81073	1.29034	1.32769	1.33632	1.14078	1.86279	1.08221	1.43069	0.434894	1.49944	1.85783	1.53641	1.44198	1.48266	1.63158	1.56249	0.993872	1.339	1.50876	1.79162	1.0954	1.05697	1.26865	1.1141	1.60434	0.457551	1.74568	2.1586	0.751266	1.15382	1.48002	1.4559	1.61862	1.40172	1.57463	1.55607	0.703784	0.888562	1.16828	1.66813	1.01908	1.34787	1.39795	1.51915	1.13372
INVADER4_I	4.95751	4.72908	5.02043	5.05465	5.5011	6.18517	7.23235	7.18864	5.28678	5.17148	5.42204	5.52951	4.6255	4.74106	5.0994	5.03759	5.65322	5.66407	5.6378	5.9503	4.22589	4.56556	4.7369	4.47716	4.57786	4.14382	4.82882	4.66265	4.81481	5.03223	5.47568	5.15375	5.23504	5.02495	5.12268	5.22581	5.16252	5.13931	5.09584	5.27182	4.69693	4.41836	4.49835	4.5679	4.67595	4.40965	4.9194	4.90435	5.19488
INVADER4_LTR	2.50559	2.68344	2.77933	2.87103	2.84964	3.04736	4.18116	4.14318	2.89109	2.95569	2.8915	3.16728	2.7295	2.82844	2.81916	3.18815	3.3314	3.47323	3.33032	3.41328	1.84155	2.12726	2.78448	2.66019	2.27944	2.08637	2.72596	2.49654	2.86412	2.40019	3.27465	3.15844	3.10926	2.91417	3.05868	2.97912	2.82781	3.14281	2.81535	2.8288	2.6036	2.57608	2.48106	1.88566	2.73479	2.75191	2.99482	3.14958	2.96107
INVADER5_I	1.58382	1.37344	1.41043	1.40038	1.8883	1.80474	1.70479	1.54923	1.79765	1.50034	1.543	1.55196	1.67529	1.67341	1.31053	1.00938	1.30876	-0.8372	1.68403	1.67139	1.25679	1.46448	1.52603	1.39747	1.02831	0.931504	1.46602	1.05641	1.47399	1.96588	1.37384	1.31451	1.70355	1.79102	1.40698	1.00042	2.26231	1.95614	1.61768	1.79304	2.11827	1.47326	1.25313	1.04946	1.15026	1.54573	1.32203	1.39789	3.30314
INVADER5_LTR	-0.160472	-0.946267	-0.587942	0.79732	-1.35632	-0.515538	-0.721134	-0.799243	-0.0993352	-1.30396	-0.281715	-0.699947	-1.02267	-0.0844993	-0.0670532	-0.0772746	0.05581	-0.378471	-1.0054	-0.408064	-0.741404	-0.382155	-0.472464	-2.14102	-0.777273	0.379316	-0.87066	-0.235368	0.265215	-1.24053	-0.127642	-0.558414	-0.616612	-1.20607	-0.53633	-1.12643	-1.37809	-0.788973	-0.767356	-0.927101	-0.616816	-1.27864	-1.28826	-0.297385	-1.78401	-2.14879	-0.185921	0.209555	0.134381
INVADER6_I	3.98895	3.9865	3.11577	3.09057	4.21749	4.36511	4.33957	4.13849	4.58185	4.37061	4.09848	4.36552	4.66095	4.64822	4.56085	4.04023	3.88546	4.03683	4.18008	4.14705	4.14703	4.03559	3.74803	3.17469	3.94827	3.73821	3.65038	3.24851	3.98862	4.5763	4.73296	4.69376	4.34318	4.53405	4.66914	4.64855	4.44265	4.49927	4.28804	4.16334	4.62896	4.62481	4.27814	4.48465	4.19598	4.1179	4.53412	4.3815	4.27882
INVADER6_LTR	1.14342	0.977683	1.08434	1.02749	1.49847	0.805153	1.69197	1.75939	1.68806	1.54097	1.80183	1.80713	1.43436	1.67341	1.91367	1.62211	1.84624	1.62012	1.75112	1.64493	1.84155	1.90913	1.43753	0.727947	1.22087	0.864426	1.41482	0.486429	1.07206	1.28022	2.39462	2.17674	1.67931	1.84163	2.02265	1.91519	1.7885	1.4461	1.81556	1.70286	2.25574	1.17793	2.00625	2.17247	1.58073	1.54573	2.22083	1.60932	1.9408
IVK_DM	4.58972	4.47728	4.91849	4.95408	4.64566	4.4053	4.79261	4.67727	4.65406	4.55548	4.73289	4.74961	4.63979	4.57114	4.68638	5.30278	4.91245	4.78232	5.00383	4.93948	5.01999	5.01859	5.35846	5.09423	4.51187	4.7193	4.91887	5.04838	6.00297	4.53091	4.66958	4.9473	4.58744	4.79387	5.27154	4.90113	4.63316	4.65862	5.24746	4.80717	4.87287	4.89781	4.71202	4.7611	5.01841	5.25423	4.79504	4.97601	4.56609
Jockey	7.42465	7.21988	7.82634	7.84425	7.27752	7.07736	8.18295	8.18438	7.94451	7.95739	8.07542	8.16997	7.29746	7.58749	8.47582	8.34353	6.17737	6.17983	6.4154	6.63946	8.13322	7.94868	8.10764	8.73347	7.33747	7.21279	8.19848	7.85252	6.85227	7.40263	8.00863	7.89171	7.56399	7.57898	7.8244	8.11568	7.78223	7.79135	7.74589	8.13499	8.64228	8.59591	8.7136	8.697	6.87043	6.30834	7.24772	7.0934	7.74114
JOCKEY2	4.85116	4.86862	4.35749	4.27105	4.70073	4.79835	4.03146	4.12906	4.02849	4.15199	3.8169	3.8453	4.68181	4.29575	4.06902	3.79782	3.99793	4.1145	3.83826	4.2516	4.68808	4.60243	4.019	4.17461	4.56609	4.5955	4.11614	3.89231	4.27532	4.49759	4.15626	4.07858	4.27607	4.22173	3.63162	3.87051	4.74061	4.61556	3.78252	4.04293	4.35067	4.56341	3.98132	4.18986	4.65953	4.34206	4.25673	3.86833	4.48363
LOOPER1_DM	3.16	3.08674	2.72515	2.92279	3.68449	3.48253	3.53534	3.61114	3.35272	3.58983	3.11938	2.92837	2.90532	3.26896	2.8951	2.93262	2.87774	3.12617	2.84605	2.77244	3.27128	3.634	2.94718	2.96827	2.9574	3.47145	2.66882	2.61117	2.76407	3.47044	2.58984	3.44709	3.4184	3.24079	2.64767	3.23689	3.47627	3.53059	2.80608	3.19133	3.18848	3.22581	2.89162	2.81147	2.91164	3.21419	2.71213	2.54198	2.64426
LTRMDG3_DM	1.79526	1.43	1.47752	1.58838	2.4476	2.21967	3.06922	2.95332	3.98667	4.13881	3.56708	3.81169	1.78217	2.04677	2.08558	2.05083	2.39865	2.24799	2.49119	2.05985	2.60219	2.63412	2.23155	2.64291	2.46844	2.40233	2.57086	2.0852	1.4143	1.88573	1.49578	1.34692	2.15409	2.17339	2.32976	2.11868	3.22317	3.53059	3.33079	3.65122	0.796838	1.76268	1.64727	1.37125	5.6595	5.59302	6.46185	5.89203	5.87456
M4DM	4.85641	4.91889	4.67762	4.81378	4.87844	4.96894	4.94085	4.95851	4.46489	4.56043	4.32326	4.32185	4.82619	4.96177	5.21688	5.15006	5.11889	5.26878	5.01069	5.29901	5.56303	5.64941	5.43474	5.801	4.43626	4.66613	4.58426	4.34797	4.9294	5.35229	5.59191	5.49658	4.72108	4.63076	4.45486	4.46294	5.33244	5.30208	5.05922	5.41596	4.74443	4.67211	4.80278	5.08066	4.45901	4.82974	4.88023	4.71171	4.98611
MARINER2_DM	4.04516	4.17205	4.29609	4.27852	4.1158	4.11669	3.85293	4.10522	4.0434	4.15199	4.14998	4.17478	4.00791	4.05911	4.07312	3.82819	3.96878	3.90178	4.25134	4.58661	4.11425	4.3548	3.91795	4.2564	3.84484	3.86373	3.98477	3.84625	3.68619	4.01354	4.29152	3.8146	4.18	4.00014	3.67892	3.72227	4.10474	3.9787	3.48988	3.78908	4.10897	4.10165	4.45423	4.23017	4.18837	4.0014	4.21011	4.07629	3.77703
MAX_I	7.82293	7.72197	7.38034	7.44146	6.9765	6.78009	6.44786	6.52379	8.12816	8.11033	8.1258	8.20922	9.22381	9.10759	8.92551	8.9168	6.98699	6.93995	6.99777	6.98169	6.02879	5.80384	5.80478	5.77348	6.78885	6.31996	6.27467	6.13364	6.04867	6.06214	5.45578	5.34438	7.54818	7.48658	7.26636	7.41007	7.45474	7.42217	7.10719	7.22835	5.86749	5.78128	5.34487	5.26381	10.0821	9.49436	10.0569	10.026	7.15988
MAX_LTR	3.33556	3.29902	2.80568	2.73289	2.16387	1.89782	1.70479	1.57724	3.20803	2.79702	3.11525	2.86425	4.68181	4.63565	3.85278	4.3349	2.26117	2.26904	2.41047	2.53369	1.71605	1.29462	1.28356	1.39747	2.76478	1.99524	2.37043	1.99596	2.3087	1.5639	1.41564	0.809517	3.48983	2.79081	3.3197	2.52888	3.32796	2.89322	2.77788	2.52983	1.88386	0.806145	1.29376	1.2864	4.98365	4.08647	5.47397	4.81717	2.78863
MDG1_I	6.82327	6.93849	7.01087	7.01157	6.66928	6.9212	6.25378	6.33269	7.41196	7.48625	7.62106	7.52542	7.12415	7.18149	7.4237	7.38576	6.86278	7.22565	7.01792	7.09172	7.32765	7.51261	7.42813	7.80293	6.79012	6.9811	7.13497	6.92584	7.6122	7.97644	7.59417	7.7402	6.89426	7.03989	6.64349	7.09624	7.26142	7.22376	7.06406	7.23406	5.8184	5.97291	5.47642	5.51757	7.16036	7.28152	7.71656	7.47772	6.81115
MDG1_LTR	3.10817	3.08674	3.35756	3.05622	2.6175	2.59811	2.74857	2.56306	3.60973	3.76297	3.80152	3.91929	3.4008	3.25808	3.54037	3.79167	2.52416	2.87466	2.97092	3.08942	4.26375	3.80193	3.76632	4.18061	4.10298	3.71935	3.97007	3.45794	3.66501	4.01354	3.92254	3.92068	3.2962	3.17323	2.90139	3.41744	4.35068	4.10862	3.86076	4.31562	2.08175	2.69536	2.40892	2.12438	3.35411	3.4299	4.15647	4.07629	3.11509
MDG3_DM	4.35044	4.28369	4.38396	4.49058	5.90913	5.66565	6.29411	6.20837	6.9837	7.15764	6.72166	6.73683	5.43795	5.41078	5.57388	5.67277	5.29946	5.23707	5.43085	5.35518	5.86354	5.81958	5.83714	6.01754	5.47137	5.36009	5.67589	5.4936	4.58375	4.45657	4.41517	4.60275	5.22042	5.30295	5.19361	5.07013	6.25721	6.42772	6.16185	6.3963	4.23903	4.55712	4.71576	4.64235	9.4162	9.5131	10.3665	9.90166	9.62171
MICROPIA_I	5.21197	5.34377	5.9841	6.19542	7.4156	7.91981	8.30913	8.41596	5.1419	5.10191	5.94187	6.06795	6.57804	6.76909	7.08221	7.28644	5.38192	5.32767	6.32608	6.41805	5.09333	5.04227	6.00591	6.37226	4.27199	4.04126	5.42513	5.34492	5.13442	5.26389	6.08997	5.90301	4.50708	4.71462	5.39589	5.51791	5.69678	5.77841	5.97064	6.2646	5.49301	5.36894	6.14425	6.02443	5.84766	5.80869	6.83054	6.69052	4.67538
MICROPIA_LTR	2.73935	2.99599	3.79903	3.88731	4.06633	4.56283	5.11062	5.17785	2.93972	3.13889	3.70291	3.71632	3.67495	3.94154	4.39094	4.5286	2.76359	2.66824	3.95313	3.8145	2.93819	2.70365	3.83028	4.16859	2.09506	2.17208	3.07283	3.34201	3.30855	2.66318	3.73714	3.67479	2.38145	2.34108	3.33946	3.38625	3.5647	3.45659	3.66429	4.10586	2.57761	2.71808	3.34256	3.43137	3.08565	3.37892	4.08936	3.90884	2.36601
NOMAD_I	6.73203	6.64492	7.75398	7.77795	5.14385	5.09224	6.85429	6.8225	6.08627	5.9039	7.07436	7.16333	6.62367	6.55562	7.37356	7.19559	6.29798	6.28694	7.98192	7.94012	7.08592	6.66365	7.76849	8.25029	5.60399	5.58769	6.91461	6.67524	6.42957	6.75607	7.52841	7.56531	5.58088	5.47713	7.07298	7.07316	6.00332	5.99552	7.05479	7.28545	7.15137	7.03415	7.94263	7.83574	5.88817	5.65004	7.67948	7.57673	5.23744
NOMAD_LTR	4.03131	3.71782	5.55967	5.59891	2.72766	2.21967	4.21516	4.3276	4.34965	4.31898	5.1469	5.2573	3.66101	3.7372	4.71547	4.25667	3.72913	3.70723	5.47741	5.508	5.31511	5.00144	5.71633	6.22477	3.9663	3.62118	4.9641	4.62594	3.4139	3.34117	4.34117	4.2682	2.8625	2.30546	4.47733	4.84201	4.11009	4.0086	5.06117	5.26528	4.48257	3.8369	5.02717	4.78449	3.36766	2.91824	4.67811	4.67564	2.94061
PLACW_DM	1.85937	2.15561	1.01828	1.11908	1.9979	2.14569	1.79148	1.43144	2.27288	2.07133	1.82229	1.12149	2.01914	2.19113	1.28253	1.8285	0.814234	2.13783	0.992426	1.72291	2.47883	2.20124	1.11116	1.4381	2.27944	1.11584	1.74011	1.24897	1.14731	2.11395	1.37384	1.31451	1.57806	1.76503	1.26953	1.51478	2.81476	1.89342	1.46101	1.70286	1.9663	2.473	1.51607	1.63419	1.43394	1.4303	1.53876	1.26549	2.36601
POGO	6.1168	6.18642	6.56881	6.56672	4.15576	4.63896	4.034	4.12433	3.65897	3.52042	3.85959	3.69014	4.51362	4.0338	3.55214	3.58666	4.28479	4.56116	3.83439	3.76005	4.45265	4.49377	2.84078	3.24508	5.08242	5.22958	3.96711	4.1656	3.69458	3.88544	3.58056	3.79712	4.05369	4.01676	3.72847	3.65189	4.41696	4.48339	2.84283	2.9708	3.366	3.64871	3.13464	3.42145	3.76571	4.11167	4.19954	4.01162	3.5117
POGON1	0.506356	0.899721	0.266698	0.0973987	2.57096	2.73054	1.93983	2.08611	1.72553	2.39319	2.01234	1.12149	2.22263	1.79891	0.365514	0.445824	2.33155	3.28965	2.36836	2.95586	0.91991	1.75389	0.221916	0.59053	0.95796	1.42605	3.29205	3.46904	0.937193	2.40019	0.287002	1.80911	1.18916	1.15382	0.228343	1.39453	1.24325	1.68703	0.174882	0.864495	0.884252	1.7183	0.981957	1.2864	1.43394	1.61786	1.60432	1.67343	-0.379629
PROTOP,PROTOP_A,PROTOP_B	7.81823	7.99932	7.88389	7.98232	7.80364	7.82077	7.74584	7.76392	7.89013	7.95598	7.97692	7.78122	7.80966	7.92692	7.93369	7.77647	8.04747	8.04935	7.97272	8.03424	7.78692	7.99924	7.80587	7.75348	7.5953	7.7751	7.99126	7.73764	8.30362	8.63718	8.13092	8.16965	7.79057	7.72345	7.64894	7.81806	8.04512	7.92131	7.71246	7.93311	7.8445	7.96401	7.88231	7.74325	7.59184	7.73254	8.10388	7.90431	7.83421
QUASIMODO2-I_DM	3.59606	3.56203	5.50645	5.38264	3.16371	3.2899	4.68189	4.91528	2.64937	3.01458	5.21617	5.12087	3.48232	3.44248	5.59253	5.81301	4.21204	4.1145	6.16319	5.91197	3.27128	3.66919	5.90308	5.91333	3.78514	3.86373	5.24507	5.35841	4.586	2.98506	5.266	5.71406	3.72113	4.03861	5.25082	5.45165	3.46795	3.4457	5.58912	5.55668	3.6163	3.70665	5.63503	5.46785	3.94807	4.16681	4.97623	4.87738	2.71825
QUASIMODO2-LTR_DM	4.40516	4.09543	4.65968	4.76144	4.0747	4.45209	4.57423	4.6043	4.14021	4.34216	4.47794	4.48912	4.25987	4.44722	4.72591	4.65597	4.10226	4.17711	4.87815	4.76	4.35077	4.36019	4.65683	5.13805	4.20522	4.49375	4.40999	4.35994	3.4037	4.31072	4.56665	5.01441	3.62922	4.23125	4.09973	4.75005	3.94617	4.30212	4.2475	4.58118	3.89414	4.31784	4.92419	4.5634	4.22604	4.11167	4.50438	4.37509	3.84466
QUASIMODO_I	6.24832	6.57139	7.53205	7.54055	5.9415	6.24839	7.44856	7.49425	6.05901	6.19074	7.27971	7.01777	5.93442	5.77389	7.54505	7.51367	6.32554	6.37334	7.89605	7.55759	6.05926	6.29546	7.76121	7.53444	5.85206	6.42553	7.26083	7.22114	6.52554	6.21551	7.24075	7.70547	6.20137	6.30969	7.0375	7.66281	6.0912	6.03601	7.04052	7.50673	6.00548	6.63673	7.435	7.463	6.03546	6.36052	7.51502	7.39972	5.8853
QUASIMODO_LTR	4.64533	4.75698	5.68825	5.68853	4.09128	4.42888	5.48225	5.6195	4.26948	4.22237	5.57379	5.49212	3.95177	4.0778	5.47836	5.50055	4.28479	4.33522	5.78414	5.71774	4.37865	4.52292	5.645	5.98363	4.15107	3.85512	5.43266	5.34191	4.62821	4.38549	5.43814	5.24255	4.5545	4.43039	5.35035	5.75919	4.05565	4.16281	5.37056	5.58956	4.38104	4.45939	5.64094	5.69882	4.62611	4.63058	5.74502	5.61976	4.31106
R1-2_DM	2.28991	2.28391	1.99521	2.1298	2.16387	1.70523	1.972	1.96415	2.09824	2.12576	2.33776	2.35244	2.64705	2.14459	1.81937	1.85234	2.26117	2.22662	2.54889	2.4597	2.55411	2.31669	2.73335	2.41766	2.7016	2.77531	2.51522	2.09955	2.08453	2.56366	1.84081	1.76181	2.76221	2.21237	2.23799	1.95825	2.22333	2.04538	2.40038	2.11779	2.18864	2.04014	2.40892	2.54544	2.69236	1.87494	2.30211	2.23718	2.20377
R1_DM	6.24533	5.87115	4.74043	4.75966	6.26205	6.71922	4.78961	4.54526	6.34434	5.64204	4.50509	4.36221	8.53569	8.45433	7.15786	7.74298	6.99785	7.18952	5.03277	5.04191	6.8399	6.18584	5.46752	4.90069	6.58367	5.67592	5.4529	5.7299	6.55693	5.81408	5.20174	4.57907	6.82551	6.62982	5.49943	4.44413	7.72756	7.75654	5.69719	5.09552	7.87949	7.57895	6.73889	7.59952	7.43663	6.72644	5.94016	6.31266	7.66133
R2_DM	5.85639	5.63293	4.14951	3.8104	5.4855	5.96624	7.36572	7.4547	10.3048	10.4391	7.49571	7.16476	10.577	10.7072	6.89608	6.89563	6.07852	6.19229	5.44104	5.44036	5.53853	4.99798	5.70784	6.42879	8.14061	7.67712	5.13599	4.89638	6.25555	6.45478	6.73085	6.41102	8.85691	8.91325	6.1827	6.55167	6.13256	6.27771	6.88621	7.18772	6.18834	6.06882	3.54122	3.56346	7.31431	7.16599	6.57962	6.21911	6.67379
ROOA_I	7.41046	7.33636	6.85836	6.75517	7.41889	7.57516	6.78051	6.80707	7.62705	7.7445	6.78263	6.87631	7.45822	7.37467	6.51491	6.53593	7.27658	7.43228	6.78162	6.8496	7.07211	7.2526	6.34086	6.76351	7.36237	7.47062	6.80867	6.47513	6.66864	7.23383	6.89593	6.64649	7.08567	7.21568	6.71236	6.9645	7.08849	7.13928	6.0699	6.34381	7.56089	7.60965	7.02563	6.95051	7.16425	7.11783	6.99465	6.57988	7.62091
ROOA_LTR	5.07917	5.08221	3.50151	3.78964	5.01507	5.34042	3.47675	3.32767	4.90734	5.00358	3.49881	3.26275	5.37103	5.3247	3.20958	3.15018	4.76343	4.88137	3.39469	3.51176	4.82609	5.01518	3.33303	3.58969	5.0616	5.27548	3.45722	3.19605	4.22119	4.93103	3.28597	3.25553	4.54111	4.65573	3.49733	3.76534	5.12335	4.96347	3.45469	3.4808	4.72087	4.91758	3.35221	3.40142	4.60339	4.44973	3.29205	3.22994	5.12859
ROO_I	9.60707	9.81732	9.71329	9.73494	9.58616	10.1611	10.1043	10.0115	10.1482	10.2933	10.1233	10.0774	9.77792	10.0752	10.1809	10.2635	9.80803	10.3357	10.3174	10.4771	9.94093	10.0857	9.70046	10.3565	9.8965	9.89522	10.1584	9.76371	9.3664	9.96597	9.99393	10.0332	9.9892	10.0842	9.60821	10.2193	9.92469	9.93815	9.53748	9.83093	9.70384	10.0429	9.82108	9.90708	9.57843	9.77751	10.2213	9.97192	9.76406
ROO_LTR	6.09588	5.99583	5.91014	5.9258	5.52266	5.74921	5.33232	5.35411	5.66492	5.65366	5.69869	5.71494	6.0539	6.24007	6.00506	6.08487	5.44413	5.84148	5.5297	5.56733	5.87092	5.91428	5.37165	5.60975	6.29352	6.10251	6.37241	5.9508	5.66385	6.01347	5.83851	5.57049	5.51049	5.35832	5.16759	5.07258	5.9461	5.79995	5.64872	5.85765	5.93046	5.74855	5.91931	6.01622	5.62043	5.56593	5.93539	5.78001	7.7441
ROVER_DM	4.72492	4.81122	5.00061	5.04592	5.3089	5.28549	5.5522	5.42517	4.59709	4.9705	4.73558	4.68479	4.82619	4.9415	5.19263	5.7761	5.39568	5.23707	5.50318	5.12564	5.69362	5.85057	6.1205	5.5368	5.49951	5.46003	5.45078	5.74024	6.19255	4.93602	4.94408	5.47292	5.51221	5.62713	5.44802	5.53578	5.09932	5.25608	5.82324	5.03982	5.39223	5.77045	5.38302	5.37073	5.01411	5.38141	5.09218	5.16626	5.97607
RSP	-1.24612	-0.683696	-1.51886	-3.88251	-1.77013	-0.77816	-4.09103	-2.53036	-0.0993352	-0.305743	-1.00304	-1.22942	-0.216573	0.384561	-0.218888	-0.376484	0.05581	-1.25138	-2.1175	-3.09801	-0.741404	-0.244823	-0.164727	-3.71331	-0.193135	0.379316	-2.62988	-0.309279	0.937193	-0.0724969	-2.70475	-2.55205	-0.295126	0.842031	-0.6881	-0.805133	-1.37809	-1.59446	-2.14194	-2.50659	0.966671	0.178564	-1.06638	-0.948449	1.48455	1.54573	-0.715707	0.209555	-1.18558
S2_DM	3.14293	3.47062	2.94257	3.03874	3.547	3.51227	3.00329	2.90993	2.87451	3.33647	3.09016	2.58619	3.78185	3.79106	3.05262	3.2612	2.95408	3.27931	2.77529	2.84398	3.50424	3.62507	3.25749	2.94026	3.11119	3.0862	2.95829	2.76315	3.08436	3.42862	2.80959	2.74953	3.08178	3.13316	2.51494	2.89298	3.72679	3.56117	3.00566	3.13497	3.6541	3.33271	2.91785	3.25279	3.28441	3.22578	3.35054	3.04036	3.57944
SAR2_DM	2.9698	3.12151	3.44397	3.36298	2.98002	3.6118	3.0791	3.21632	3.65897	3.97797	4.10058	2.87359	3.33209	2.7529	3.16426	3.20676	4.05451	3.95473	3.81493	3.59014	3.57823	3.66047	3.8882	2.3972	3.4934	3.64136	4.06999	3.81179	3.7955	3.07816	3.14396	3.58254	3.74469	3.21222	3.27935	3.63872	3.99328	4.12236	3.82906	3.77439	2.88367	2.9275	3.18949	3.19576	2.96608	2.68633	3.38826	3.41633	3.23756
SAR_DM	5.39615	5.43986	4.14694	4.28595	4.64566	5.79531	2.87305	3.12441	5.02469	5.61137	4.67078	4.3885	5.10372	4.37851	3.42342	4.55426	6.70935	6.95139	5.0124	4.55853	5.62835	5.17366	5.43703	4.69815	5.91376	4.92257	4.21424	5.50847	7.55145	4.80051	3.80162	4.28502	5.03227	5.35832	4.09683	4.11843	5.52106	5.32899	5.86181	4.9182	5.86212	5.98701	3.75271	4.26939	4.97482	5.40453	3.53839	3.29252	5.16433
S_DM	5.31082	5.62992	4.95573	5.20853	5.69529	5.81632	5.36095	5.34192	5.63447	5.83818	5.45107	5.3184	5.58175	5.67708	5.51793	5.51929	5.70716	5.90508	5.53803	5.62263	5.52612	5.6582	5.10767	5.05232	5.99286	6.34938	6.18583	5.97727	5.9979	6.12022	5.98801	6.17532	5.57924	5.63433	5.19633	5.46104	6.62286	6.65858	5.23714	5.43008	5.67562	6.05327	5.56415	5.43374	5.79349	5.88557	5.43621	5.49226	5.71203
STALKER2_I	7.18091	7.25651	7.51368	7.44672	6.06417	6.26159	6.43973	6.58972	6.91594	7.12711	7.35886	7.15666	6.13932	6.18796	6.62703	6.61122	6.33699	6.865	7.19176	7.34389	8.25478	8.26018	8.29262	9.22021	6.14904	6.03358	6.54159	6.12314	5.28919	5.88794	5.77569	5.90301	7.29357	7.25063	6.87056	7.57994	7.21435	7.20532	7.12781	7.22025	6.70741	6.8638	7.02789	7.0624	5.45897	5.31244	6.64144	6.25009	7.84663
STALKER2_LTR	3.85384	3.65987	3.66154	3.67736	3.14794	3.43673	3.43889	3.43104	2.94767	3.49996	3.44376	3.2909	2.97458	3.26896	3.28913	3.24328	2.79713	3.41774	3.2744	3.48962	4.45919	4.45397	4.18858	5.59635	2.65789	2.81137	2.95231	2.60111	1.97863	2.68702	2.57146	2.26419	3.38131	3.23133	3.05868	3.74704	3.11017	3.23422	3.2164	3.59383	4.47555	4.64273	4.7045	4.82642	1.58073	1.75212	2.86708	2.61997	3.70607
STALKER3_LTR	-0.0780989	0.0523423	-1.51886	-2.31181	0.54786	0.357994	-0.791405	-0.536627	0.932296	1.27803	-0.00448844	0.122156	0.882068	0.673867	-0.928314	0.50718	1.10954	1.94196	0.649732	0.890359	1.25679	0.542953	0.526535	-0.271183	1.39073	1.42605	-1.1502	0.300158	1.43447	1.14903	-0.0122859	-0.972743	1.32035	1.34137	0.498222	0.515281	1.28171	0.925499	-0.146727	-0.442458	0.796838	1.36227	-0.874108	-0.756152	0.796805	1.06788	-0.301262	-0.18598	1.13372
STALKER4_I	7.04393	7.14372	7.60793	7.65376	6.74066	6.78619	7.23263	7.26165	7.5923	7.6519	7.90036	7.72977	7.25517	7.24006	7.53877	7.57629	7.71703	7.8706	7.92517	7.82402	6.64278	6.92249	7.52447	7.33307	7.08548	7.37144	7.50889	7.41794	7.31046	7.22876	7.43811	7.46737	7.57471	7.55406	7.55037	7.87007	7.85935	7.75598	7.69843	7.90999	7.32447	7.68581	7.60152	7.5158	6.93554	7.18095	7.52033	7.52627	7.36189
STALKER4_LTR	4.09926	4.10415	4.75909	4.643	3.74861	3.76791	4.4692	4.67727	4.22767	4.12551	4.80918	4.89194	4.32319	4.52193	4.67834	4.68281	4.37086	4.46862	4.8459	4.88398	3.73742	3.78599	4.58242	4.66858	4.05323	4.1579	4.62801	4.35097	4.26409	4.37818	4.64343	4.63919	4.3547	4.25944	4.48179	4.85631	4.64796	4.56615	4.77059	5.03059	4.2799	4.30289	4.54957	4.47988	3.93903	4.11167	4.55085	4.57574	4.41854
TABOR_I	5.82596	6.16158	6.22765	6.32669	4.73807	5.00601	6.21342	6.29945	6.89246	7.14039	7.23415	7.19951	4.30538	4.499	6.00827	6.04405	5.56103	5.89665	6.74094	6.72407	5.25246	5.32749	6.20938	6.7322	4.15893	4.1579	5.95215	5.7043	5.84618	5.92851	6.55028	6.76065	7.78668	7.81535	7.63526	8.24274	5.40609	5.43188	5.99636	6.41002	5.97842	6.19968	6.61611	6.51289	3.40755	3.49837	5.67427	5.73064	6.76098
TABOR_LTR	2.27431	2.40172	3.17255	3.19949	1.84984	2.14569	2.69175	2.99544	2.89931	2.98544	3.56708	3.58038	1.14497	1.38401	2.78962	2.9982	1.67636	1.80449	3.29703	3.48217	2.16339	1.84902	2.97889	3.69402	0.723626	0.864426	2.84034	2.51807	2.13471	2.58919	3.27465	3.10259	4.00576	3.38426	3.58271	4.23681	2.03354	2.07395	2.76836	3.20234	2.31986	2.17761	2.98141	2.98306	1.21164	0.261043	2.48729	2.5189	3.5117
TAHRE	4.596	4.70062	4.01484	4.15141	4.22502	4.48996	4.23297	4.13849	4.85336	4.85441	4.92485	4.84049	5.16919	5.222	4.81413	5.31356	4.62083	4.67991	4.37348	4.49698	5.62835	5.25986	5.46416	5.48926	5.61831	5.3448	5.18266	5.20426	6.38427	5.74477	5.34114	5.13994	5.71062	5.6785	5.49503	5.17424	5.60308	5.50187	5.41852	4.66317	1.8408	0.888562	2.23208	2.39143	7.59256	7.66924	7.23548	7.16158	5.33865
TART-A	6.41758	6.33081	5.62123	5.75874	7.6421	7.40623	7.44666	7.39547	6.12883	5.86442	6.50108	6.57528	5.13934	4.79478	5.22793	5.29193	6.8124	6.67396	7.2411	7.31847	7.07424	6.99881	6.85774	7.15792	7.75942	7.2698	7.7174	7.47684	6.15354	6.88921	6.45701	6.00045	5.92809	5.81616	5.85478	5.74081	6.18929	6.24825	6.09106	5.95933	5.74148	5.58517	6.09625	6.00132	8.91607	8.49406	8.48078	8.4551	6.28486
TART_B1	1.33599	0.729892	5.72323	5.82229	6.4792	6.5377	7.20102	7.26327	8.9177	8.83356	9.10924	9.07718	5.91986	5.70541	6.39088	6.15004	5.3053	5.41292	6.26139	6.48299	5.77453	5.38947	5.73316	6.01418	6.4183	5.94707	6.84257	6.45783	5.81959	6.69418	6.48059	5.79557	8.02744	7.67674	7.63501	7.83476	6.20439	6.44968	6.06017	6.38245	4.10897	4.28779	5.10913	5.10873	9.08676	8.78585	9.29051	9.12884	5.77695
TC1-2_DM	6.0428	6.314	5.81607	5.79738	5.97986	5.97961	5.69557	5.62621	6.02936	6.21605	5.69175	5.69796	5.64685	5.78151	5.50284	5.51556	5.491	5.75457	5.3261	5.44228	5.8159	6.00658	5.24178	5.482	5.9707	6.19755	5.67317	5.33586	5.29747	5.95576	5.7037	5.98509	5.93323	6.07866	5.49833	6.04661	5.63685	5.54332	4.88294	5.34445	5.97594	6.02849	5.71573	5.75911	5.59475	5.84295	5.59987	5.35728	5.97858
TC1_DM	5.32603	5.39439	5.03303	5.11429	5.33699	5.28118	5.13332	4.97965	5.20128	5.26237	5.06235	5.05674	5.34512	5.23316	5.0994	5.02191	5.13866	5.25829	4.88563	4.87547	5.46567	5.60695	5.01284	5.17157	5.07412	5.20606	5.14125	4.89638	4.90972	5.39634	5.17764	5.24685	5.20988	5.3209	4.8262	4.99717	5.45108	5.34079	4.92426	5.14201	5.31961	5.3326	5.29821	5.21873	5.08552	5.16677	5.06914	4.95681	5.17312
TIRANT_I	5.66934	5.76522	5.11827	5.03273	6.20224	5.96624	6.00896	5.84357	4.96525	5.27747	4.81812	4.89194	5.62188	5.62083	5.86692	5.83262	7.42008	7.29594	7.09136	7.15872	4.14703	4.1143	4.26257	3.63408	5.01037	5.43135	5.28245	5.22895	6.19033	6.41071	6.47442	6.54713	4.54782	4.75148	5.04056	4.78036	5.22552	5.02327	4.89612	4.88441	4.9458	5.22965	3.54963	4.02286	5.32999	5.44227	5.38583	5.27873	4.64409
TIRANT_LTR	2.30533	2.08691	1.9006	1.78297	3.2251	2.82838	2.73613	3.09565	2.89109	3.02893	2.51159	2.50441	2.99694	3.19097	3.23171	3.21598	4.53892	4.52661	3.99871	3.96649	0.91991	0.295211	0.991922	0.438634	3.72286	3.41397	3.37477	3.43549	3.74794	4.16553	4.28025	4.29751	1.65465	1.73856	1.90822	1.33042	3.38206	3.00127	2.98936	3.58545	2.4967	2.57608	1.25313	1.66813	3.4206	3.17886	2.26204	2.69396	2.36601
TLD1	-1.92214	-1.2675	-3.9598	-4.86139	-2.35263	-1.09947	-9.96578	-4.09875	-1.55606	-2.03855	-1.73808	-2.80763	-0.70133	-3.7667	-2.38295	-4.05462	-1.05805	-0.515787	-1.12064	-0.786001	-0.519356	-0.703613	-2.27482	-1.4066	-1.361	-9.96578	-2.94957	-1.55475	-2.40639	-3.23034	-9.96578	-4.12019	-0.114762	-0.429848	-1.2719	-1.80261	-2.37435	-1.2734	-1.00792	-2.82647	-9.96578	-3.26818	-9.96578	-3.73919	-1.37022	-2.14879	-1.88267	-2.84022	-3.17577
TLD2	0.75131	1.37344	1.67623	1.58838	1.64045	0.985628	1.52852	1.43144	1.14078	1.50034	2.08187	1.0898	0.145624	0.673867	1.8953	1.72899	2.02676	1.86106	1.97813	1.72291	0.25739	1.46448	2.21034	0.727947	-0.0412973	-0.35691	1.51548	1.68938	1.58642	1.84393	1.19334	2.0046	0.884457	1.02835	1.59956	1.97931	1.0339	0.650024	1.3632	1.65557	0.884252	1.11084	1.37173	1.24202	1.48455	1.26044	1.50482	1.60932	0.397197
Transib1	2.80594	3.10423	2.42723	2.58011	3.25484	3.23744	2.36018	2.38439	2.75278	2.83018	2.48617	1.91958	2.90532	2.85759	2.06928	2.18831	2.60215	2.48241	2.35763	2.48975	2.91934	3.02213	1.80605	1.82264	2.84494	2.94724	2.39706	2.2095	2.73996	2.63893	2.06752	2.45467	2.88387	2.92595	2.22742	2.34643	3.12082	2.75894	2.59607	2.69487	3.08158	3.44591	2.33299	2.61668	2.11823	2.71949	2.60409	2.39761	2.42612
TRANSIB2	5.58969	5.70919	5.54508	5.52862	5.52266	5.61514	5.54152	5.45943	5.28678	5.59458	5.40942	5.41429	5.49799	5.7134	5.63606	5.47198	5.08873	5.17428	5.22646	5.18883	5.42614	5.89025	5.67821	5.84321	5.17449	5.22958	5.28007	5.13104	5.39847	5.83023	5.73499	5.85029	5.37179	5.5321	5.29956	5.38615	5.82763	5.5935	5.24575	5.51202	5.65402	5.79202	5.7269	5.54978	5.4747	5.51726	5.84164	5.43176	5.32687
TRANSIB3	4.43	4.62995	4.50145	4.62944	4.84949	5.13588	4.38408	4.26441	4.72514	4.80939	4.59106	4.55733	4.52905	4.59297	4.08937	4.07611	4.46257	4.53097	4.14621	4.49327	4.34372	4.65604	4.19399	4.06215	4.54824	4.91845	4.45081	4.23874	4.07467	4.46348	4.15626	4.16292	4.58417	4.75479	4.09683	4.44413	4.41696	4.18916	3.85628	4.06723	4.05348	4.24931	4.22661	4.34477	4.72414	4.96379	4.61985	4.4287	4.828
Transib4	3.40164	3.41566	3.03455	2.95422	3.32663	3.49748	2.88999	2.78342	3.22774	3.1256	3.00771	2.8454	3.52911	3.26896	2.93162	2.97667	2.95408	3.09113	2.62241	2.6447	3.45271	3.48399	2.59289	2.57167	2.82532	3.36627	2.83386	2.68916	3.01908	3.13126	2.94422	3.19451	3.05377	3.33212	2.55775	2.8593	3.23302	2.94052	2.49579	2.2616	3.2391	3.67217	3.00607	2.89981	2.94816	3.24867	2.90661	2.82204	3.04013
Transib5	3.57712	3.82716	3.29849	3.27112	3.28399	3.74303	2.81511	2.577	3.46772	3.48961	3.29067	3.18988	3.36685	3.31171	2.52862	2.81623	3.1615	3.07925	2.16195	2.65799	3.89049	4.1521	3.84756	3.50618	3.86421	3.86373	3.24396	3.48553	3.19491	3.06001	2.49553	2.73736	3.93586	4.01124	3.67504	3.75317	3.39088	3.30821	2.67972	2.51224	3.22243	3.41843	2.79588	2.81147	2.77601	3.30438	2.62003	3.04036	3.87733
Transib-N1_DM	0.275207	1.37344	0.662339	0.851737	0.226179	0.0687372	0.133411	0.33689	1.02536	0.541461	0.345697	0.685628	0.882068	0.799322	1.00254	0.445824	0.814234	0.483181	0.150542	0.697825	1.13131	1.38205	0.719054	0.268842	0.336872	1.11584	0.922641	1.16957	0.352607	1.00471	0.679037	1.17706	0.256852	0.154466	-0.158301	0.729267	0.891951	0.861403	0.70056	1.07084	0.382077	0.178564	0.446233	0.634657	0.212258	-0.278979	-0.301262	0.887159	-0.601708
TRANSPAC_I	6.93905	7.04192	6.96449	7.10239	8.64526	9.03795	8.99302	9.07982	8.46881	8.72314	8.48271	8.31001	6.18143	6.3947	6.63674	6.54418	7.00055	7.36358	6.87012	7.11239	6.87703	7.22256	6.57876	6.96462	6.43297	6.74745	6.86142	6.52981	6.85227	7.44519	7.41511	7.58582	8.60699	8.75865	7.77877	8.50432	7.12133	7.31856	6.76218	7.37303	8.09579	8.32195	8.22654	8.14643	8.7349	8.88395	8.656	8.41952	8.64601
TRANSPAC_LTR	2.75067	3.10423	3.04011	3.11302	4.78978	5.13588	4.79261	5.00564	4.15401	4.22237	3.66093	3.98968	3.16438	3.17947	3.05262	3.11119	2.89333	3.56973	2.55829	2.74778	3.14712	3.11438	2.58467	3.036	3.72286	3.11534	3.43169	2.98035	3.14682	3.45663	3.66097	3.45454	4.39247	4.24071	3.68279	3.99979	2.70584	3.14281	2.42483	3.2667	4.1884	4.27252	4.23706	4.32894	4.85972	4.8746	4.58373	4.32939	5.36576
XDMR	0.558787	1.72946	1.49382	1.41852	1.8883	2.06771	1.34417	0.921472	1.08422	1.89449	1.76002	0.505175	2.29662	1.0722	1.69741	1.50667	1.16198	0.968313	0.90674	0.212754	1.71605	2.02231	1.3817	-0.408512	1.0954	2.27897	1.79454	1.74522	3.25852	1.61451	0.679037	1.71292	1.60404	1.98361	1.89492	1.11901	1.89156	1.89342	1.25827	0.718728	2.22258	2.33285	1.12391	1.52731	1.32706	1.54573	0.970714	1.1197	0.718906
ZAM_I	2.35065	2.42973	2.19779	2.0033	5.32301	4.46736	3.25501	3.08594	2.62974	2.6927	2.03881	2.04056	2.22263	1.99525	1.91367	3.27008	2.72924	2.86086	2.88391	2.15669	2.77995	2.90894	3.74435	2.66019	4.29357	4.70019	2.99361	3.76754	4.69033	2.56366	1.87118	2.0643	2.56464	2.45924	3.3047	1.65223	4.93712	4.87696	5.28967	4.55993	2.98601	2.76246	2.18965	1.99666	2.50895	2.36864	2.24158	2.19412	2.45526
ZAM_LTR	-0.000176583	-0.0995062	0.266698	-0.442557	3.1793	3.38943	2.25951	2.31955	-0.388498	0.179174	0.0997472	-0.815229	0.145624	-0.199849	2.75947	2.16945	0.05581	-0.137752	0.336797	0.138819	0.759535	-0.119434	0.419696	0.727947	1.84514	1.27927	1.14841	1.22298	0.992659	-0.919281	-0.0122859	0.379169	-0.394535	0.154466	0.185312	-0.221011	3.48453	3.4674	2.53	3.14071	0.119264	-0.472784	2.72338	2.37097	-0.0505276	-0.737754	0.200716	0.0253005	2.76555
[truncated: 751 more columns]

## Sheet: Table S6B
RepBase Sequence ID	100	101	105	109	129	136	138	142	149	153	158	161	176	177	181	189	195	208	21	217	223	227	228	229	233	235	237	239	256	26	28	280	287	301	303	304	306	309	31	310	313	315	317	318	319	32	320	321	324
ACCORD2_I	8.53652	8.0124	8.0359	8.05783	8.34373	8.16958	8.31417	8.62246	8.03918	8.38883	8.00698	7.87589	8.05434	8.38305	8.16441	8.27979	7.99369	8.18221	8.2348	7.97466	8.32507	8.28768	8.02433	8.11069	7.91241	8.40788	8.35251	7.97491	7.93221	7.88852	7.9237	7.99314	8.13723	8.1766	8.1517	8.11866	8.09667	8.02754	8.24134	7.85234	8.10897	8.14894	8.0439	8.07055	8.34883	8.28902	8.22902	8.32585	8.0755
ACCORD2_LTR	4.40313	4.50047	4.45904	3.75815	4.85226	4.31292	4.06723	4.37473	4.36433	5.29591	4.51418	4.31576	4.24213	4.15843	4.38809	4.26714	4.52281	4.19587	3.65643	4.68753	4.50501	4.46267	4.4968	3.61715	4.36051	4.1686	5.06405	4.55156	4.27785	4.42486	4.63991	4.52945	4.75931	4.19028	4.09624	4.18502	4.02792	4.18678	4.00963	4.08413	4.55869	3.57619	4.87297	4.16267	3.65302	3.96174	4.01269	3.99964	4.38828
ACCORD_I	8.62478	7.37152	7.79502	7.38978	7.83182	7.99609	8.4201	7.6106	7.64614	8.42402	7.12281	7.12269	7.59372	7.802	7.5919	8.23222	7.16991	8.76488	7.95989	7.08678	7.82082	8.1469	7.34168	7.67155	7.27994	7.69466	7.95838	7.17313	7.59465	7.36648	7.33658	7.57149	7.97724	7.78528	7.80835	7.73964	7.87919	6.76166	8.28082	7.5779	8.106	8.26186	7.48937	7.78937	8.42338	7.55261	8.30125	8.10971	7.76204
ACCORD_LTR	5.53324	5.72894	6.49988	5.35678	5.96094	6.20104	6.86063	5.67446	5.91667	7.14509	6.00865	6.01302	6.80318	5.42826	5.90614	5.54421	6.10348	6.01976	4.72241	6.02062	5.08565	5.95307	6.25796	4.89968	6.12812	5.14058	6.76783	6.00659	6.38547	6.09455	5.77026	6.28421	6.4678	5.07134	5.23553	5.45254	4.94593	5.53635	5.23822	6.18202	5.6111	5.49789	5.93635	6.23983	4.78586	4.57476	5.7692	5.25368	5.39709
ARS406_DM	11.0047	9.61508	9.91485	11.2947	11.8375	9.52688	11.2842	10.6096	9.94912	12.4256	9.95783	9.45019	11.0497	12.4253	10.437	11.1786	9.73088	11.8494	11.797	9.5162	11.6558	11.0944	10.0957	11.5511	9.83966	11.6908	11.0021	9.42554	9.62183	9.2414	9.96203	10.1627	10.6324	12.0009	11.8655	11.9171	11.9117	9.38457	12.0217	9.31637	11.4468	11.7052	10.3666	9.21389	12.7412	11.7533	11.863	11.8632	11.5869
BAGGINS1	9.91584	10.3722	10.6206	10.2725	10.2583	10.4106	9.66576	9.62965	10.2393	9.69193	10.7277	10.7597	10.2402	9.67459	10.3329	9.80652	10.5936	9.93807	9.68346	10.647	9.84449	10.1524	10.4522	9.92761	10.6364	9.74037	9.83751	10.5468	10.6322	10.49	10.2709	10.46	10.4568	9.74712	9.86808	9.97386	9.73701	10.2902	9.85486	10.4916	10.0588	10.0267	10.527	10.4588	9.61272	9.65245	9.80274	9.79028	10.037
BARI_DM	8.35221	7.56639	7.74389	8.31678	8.96062	8.39865	8.30477	6.40074	7.86352	8.42879	7.49877	7.08705	7.72482	7.56584	8.03099	7.91834	7.30045	7.98835	8.74825	7.62937	8.0036	8.00362	7.98674	8.22504	8.04059	8.05734	8.36912	7.46601	7.30841	7.5714	8.50888	8.07655	6.78339	8.30659	8.12944	7.56146	8.16196	8.43831	8.21977	8.54158	8.69426	9.04224	7.85663	8.60386	8.72127	8.82545	8.0325	9.01185	8.36787
BATUMI_I	10.0794	10.6493	10.7625	10.3942	10.4486	10.4553	10.6451	10.4136	10.5294	11.4335	10.8823	10.8829	10.9862	9.95632	10.5279	9.96338	10.877	10.0481	9.64376	10.8619	9.94813	10.3027	10.7393	10.1014	10.8363	9.86314	11.1058	11.052	10.9301	10.6912	10.6059	10.7883	10.7916	9.92083	10.2119	10.3052	10.0553	10.5376	10.0786	10.4827	10.3864	10.0925	10.8023	10.4123	9.74303	9.86252	10.1955	9.99232	10.2953
BATUMI_LTR	4.60811	4.80986	5.19019	4.75542	5.012	4.79167	5.2396	4.79558	4.97114	5.97772	5.08935	4.9292	5.45044	4.81486	4.95651	5.00781	5.16112	4.6322	4.21063	5.02492	4.80474	4.6753	5.0303	4.48803	5.00735	4.18002	5.74111	5.07917	5.05711	5.0878	5.05525	5.00898	5.06329	4.61137	4.73496	4.95491	4.45497	5.05485	4.62779	4.89942	4.52746	4.51116	5.24492	5.09128	4.1446	4.50777	4.84652	4.70225	4.72709
BEL_I	8.264	8.80853	8.83343	8.44148	8.3715	8.81553	8.78161	8.79531	8.45541	8.71467	9.45946	8.94464	9.42355	8.25232	8.78082	7.5958	9.06507	8.43168	7.44498	8.50161	8.08129	8.73773	8.64352	8.35735	9.17584	7.61259	8.54856	9.07841	8.90925	8.97573	9.13141	9.6218	9.03141	8.25894	8.58984	8.57658	8.00934	8.85805	7.87055	9.0312	7.70302	8.50471	8.88977	9.0201	7.86832	8.0399	8.79393	7.85862	8.63589
BEL_LTR	4.99645	5.03785	4.82079	4.8054	4.65494	5.00928	5.01082	4.69617	4.50782	5.03689	5.49274	4.7807	5.69782	4.87484	4.96854	4.12683	5.02865	5.16867	4.1921	4.40713	4.70728	5.17213	4.61189	5.11271	5.02075	4.36147	4.88481	4.79432	4.78048	4.97357	5.20613	5.72624	5.17838	4.89559	5.28117	5.03798	4.97705	5.14752	4.4372	5.14834	4.11289	5.02244	4.85637	5.23063	5.07408	4.60648	5.52433	4.60786	4.99151
Bica_I	7.99711	8.48645	8.42445	8.09294	8.26499	8.30589	8.42281	7.4036	8.20205	8.07797	8.43564	8.35392	8.38071	7.84303	8.32609	7.80423	8.35113	7.88181	8.00636	8.42077	7.69544	8.23619	8.43236	7.87496	8.24283	7.94135	8.45133	8.45659	8.46653	8.45704	8.39176	8.27132	8.35516	7.78403	7.91952	7.75645	7.77602	8.45407	7.78427	8.51642	8.48546	8.07378	8.2695	8.52149	7.79669	7.92868	7.82285	7.75715	8.03982
Bica_LTR	3.30042	3.74062	3.81897	3.17123	3.48755	3.2803	4.61306	3.13912	3.40287	4.46883	3.61431	3.50146	4.06474	3.50768	3.19937	3.4491	3.44675	3.46847	3.56581	3.50357	3.24859	3.60516	3.63213	3.0234	3.2116	3.3864	4.83123	3.11495	3.41518	3.63251	3.73245	3.33286	3.86483	3.22018	3.18176	3.16443	3.05471	3.51175	3.06983	3.76293	3.922	3.40915	3.58143	3.74462	3.20758	3.28432	3.13096	3.34799	3.26882
BLASTOPIA_I	7.90838	8.3086	8.43595	8.16101	8.43804	8.18911	8.31917	7.76798	8.54114	7.89276	8.25507	8.02043	8.51567	7.92689	8.47285	8.24271	8.39461	8.46787	8.1199	8.37825	8.77159	9.09022	7.99391	8.49379	8.66784	7.93448	8.75297	8.45116	8.67945	8.12838	8.67107	8.44376	8.45627	8.43508	8.55097	8.24152	8.15413	8.49534	7.63291	8.52416	8.43245	8.50687	8.61817	8.46349	8.06973	7.92187	8.33529	8.30416	8.60047
BLASTOPIA_LTR	4.74375	4.7716	5.26499	4.76609	5.18893	4.98286	5.15922	4.96511	5.1151	4.90298	5.29663	4.93086	5.29649	5.78156	5.04938	5.40897	5.24184	4.67554	4.84457	5.01978	5.6947	5.68891	4.69523	4.7645	5.18452	4.54636	5.55439	4.95088	4.92138	4.99108	5.2294	4.96167	5.08447	5.14642	4.854	4.99731	4.60118	5.43282	4.03893	5.24903	4.34997	4.57558	5.24128	5.27354	4.66467	4.76519	5.24224	4.91706	5.08042
BLOOD_I	9.15433	8.05235	8.23929	8.66991	8.68677	8.27407	8.59206	8.90117	8.08297	8.61346	8.00816	7.63024	7.50036	8.55882	8.2032	8.74395	8.12142	9.1663	9.31095	8.36431	8.49693	8.88168	8.23633	9.26872	8.36964	8.97041	8.67027	8.10684	8.08315	8.22678	8.27211	7.86038	8.22715	9.17585	8.97902	8.93774	9.10159	7.96179	9.19982	8.25196	9.26701	9.2721	8.67031	8.00809	9.06417	9.11628	9.12012	8.65604	8.61382
BLOOD_LTR	5.9813	5.57176	6.01317	5.6809	5.91464	5.84362	5.58675	5.70268	5.70474	5.70844	5.91315	5.48112	5.38877	5.09349	5.61651	5.61945	5.95361	5.79597	5.49001	6.25653	5.0916	6.15466	5.82064	6.04766	6.16566	5.3259	6.05605	5.78724	5.85939	6.0062	5.64236	5.49771	5.75827	5.95865	5.76607	6.02108	5.70692	5.82478	5.75517	6.1097	6.06968	5.96899	6.42129	5.93765	5.09086	5.58126	5.923	5.20643	5.46769
BS	8.15115	8.58788	8.84014	7.87144	8.13643	8.26156	8.41697	7.98224	8.55383	8.34593	8.80612	8.52953	8.80262	8.09018	8.46092	8.11185	9.2292	8.16637	7.98079	8.93881	8.15676	8.33491	8.24254	8.01143	8.40402	8.12007	8.12572	8.90829	8.24601	8.57006	8.92134	8.34568	8.56893	7.91977	8.11941	7.41721	7.92007	8.69937	7.50413	8.78449	7.94154	8.39291	8.40486	8.35717	7.96514	8.39569	8.12896	7.79165	8.46159
BS2	8.81932	9.08472	9.58461	9.03734	9.15715	9.16167	8.73118	9.34237	9.0949	9.03285	9.79891	9.88838	9.21033	8.57808	9.14158	8.84269	9.58081	8.74031	8.32709	9.90839	8.89627	8.85643	9.49963	8.60026	9.79349	8.40057	8.95444	9.54007	9.63027	9.35547	9.22358	9.72072	9.40133	8.70038	8.6593	9.07126	8.35467	9.11269	8.41764	9.48572	8.68964	8.80783	9.33535	9.26329	8.16361	8.53177	8.71971	8.56922	9.03169
BS3_DM	7.10209	7.64168	7.94311	7.51541	7.48743	7.52154	6.97486	7.22383	7.52075	6.72712	8.01028	8.06417	7.39466	7.10719	7.51898	7.08508	8.04493	6.88971	6.81835	8.12496	7.04084	7.34909	7.85703	7.15621	8.05299	6.95886	7.10459	7.87842	7.88986	7.73812	7.74552	7.92839	7.5896	6.97235	7.38	7.5778	7.04067	7.51735	7.00722	7.41463	7.00832	7.01273	7.77288	7.61266	6.54601	6.95664	6.9698	6.99875	7.22922
BS4_DM	2.60975	2.89403	2.86697	2.72584	2.49211	2.96253	2.05535	2.88708	2.8841	2.11118	3.15057	2.84562	2.55225	2.37872	3.00565	2.07457	3.15031	2.66499	2.70635	3.16192	2.29764	2.87784	2.80016	2.72265	2.84047	2.60842	2.07625	2.8497	2.92797	2.89686	2.67076	2.98092	2.90577	2.52139	3.17862	3.1006	3.00565	2.71243	2.29175	2.86092	2.6619	2.49406	2.89185	2.8477	2.40954	2.56179	2.53046	2.56814	2.59618
BURDOCK_I	7.89155	8.27936	7.94075	7.68721	8.044	8.0539	9.01117	7.65436	7.58016	8.17058	7.82378	8.03477	7.65467	7.42879	7.66929	7.5734	7.9465	8.2807	8.11468	7.78457	7.80922	8.28383	7.98435	7.77555	8.44897	7.94121	8.10764	7.40193	7.62252	7.84306	8.06379	7.98823	7.79331	8.00516	7.87179	7.77377	7.97419	8.01933	7.92612	7.85378	7.87798	8.55017	8.10061	7.77283	7.89636	8.43561	7.93861	7.76542	8.08011
BURDOCK_LTR	3.88112	4.52751	3.93069	4.4569	4.46962	4.25731	5.76029	4.56707	3.79876	4.83336	3.85568	3.85254	3.67203	4.45909	3.41699	4.11202	3.72973	4.9183	4.73206	3.71751	4.44942	4.53564	3.83916	4.17797	4.38144	4.85735	4.43327	3.28986	3.16498	3.95144	4.0525	4.33527	4.0385	4.80011	4.83073	4.68501	4.87896	4.53344	4.44208	3.87382	4.18469	5.33331	4.31257	3.85891	4.67717	5.12436	4.79054	4.65996	4.69922
Chimpo_I	6.96016	7.85091	8.01418	7.68537	7.41431	7.67267	7.34023	7.96875	7.62772	7.70528	8.29099	8.08704	7.82433	7.00427	7.69555	7.15214	8.25095	7.55167	6.42157	8.25652	7.34231	7.48623	8.01732	7.26301	8.03376	6.80542	7.91691	8.18189	7.96769	8.14899	8.11934	8.08099	8.15947	7.16744	7.19853	7.56203	6.83078	7.78698	7.08236	7.89321	7.88647	7.51396	7.98486	7.70588	6.45562	6.98364	7.02186	7.00428	7.58094
Chimpo_LTR	3.46249	3.97474	4.06944	3.85125	3.80145	3.84159	3.20716	3.94167	3.93283	3.89864	4.45175	4.03331	3.81834	3.79665	3.72433	3.72307	4.4798	4.00127	3.09332	4.37531	3.71421	3.93772	3.95759	3.52491	4.11485	3.68778	4.17517	3.82225	3.98471	4.08241	4.19945	4.13377	4.23197	3.80773	3.66154	3.649	3.748	4.02309	3.2934	4.20218	4.12162	3.66333	4.03347	3.96219	3.28194	3.33467	3.59035	3.55388	3.77912
Chouto_I	7.48806	7.7784	7.56108	7.18444	7.55491	7.55929	6.88998	8.03035	7.62843	6.65735	7.7248	7.60344	7.64591	7.29493	7.50729	7.38404	7.589	7.43454	7.36429	7.68045	7.3412	7.26217	7.71055	7.64794	7.68177	7.72405	7.59925	7.83696	7.26796	7.21643	7.75443	7.89352	7.86943	7.34876	7.44236	7.31863	7.43727	7.70156	7.16798	7.54806	7.83864	7.38516	7.68297	7.60554	7.25332	7.37362	7.315	7.32253	7.33051
Chouto_LTR	5.36605	6.03581	6.64538	5.81086	5.83751	5.63722	5.69972	6.72851	5.75668	5.63378	6.71415	6.6543	5.68077	5.68621	5.88169	5.54145	6.77658	5.44977	5.00971	6.5915	5.38134	5.39887	6.44952	5.31615	6.70569	5.22936	6.25052	6.72213	6.43049	6.06867	6.39545	6.6357	6.48628	5.26833	5.44423	5.96858	5.06157	5.92169	5.02972	6.1288	5.6641	5.62907	6.144	5.92829	4.68956	5.13283	5.46144	5.40514	5.58328
CIRCE	9.83294	9.87023	9.79126	9.60704	9.97987	9.80214	9.27122	9.72627	10.0742	9.28077	9.55819	9.68938	9.32611	9.44531	9.76573	9.45313	9.54071	9.77935	9.84364	9.65878	9.65789	9.68305	9.65855	9.51707	9.60162	9.88802	9.17563	10.0324	9.8965	9.48311	9.47151	9.79783	9.93278	9.41989	9.93493	9.78041	9.93717	9.71536	9.70023	9.30164	9.88383	9.3217	9.99315	9.41634	9.80365	9.62655	9.70989	9.48772	9.6587
Copia1-I_DM	7.76234	8.18046	8.04974	7.73635	7.93124	8.03886	7.51602	6.83176	7.71207	7.55572	8.02434	7.97169	7.91359	7.56584	7.79076	7.50674	8.21976	7.57321	7.60998	7.97421	7.55274	7.74101	8.11294	7.84145	8.0738	7.8028	7.66526	7.96517	8.34489	7.75551	7.97365	8.27051	7.66994	7.75504	7.88703	7.81005	7.74199	7.93993	7.60724	7.90907	8.08325	7.80123	8.26972	8.00761	7.59658	7.77614	7.30125	7.6076	8.11303
Copia1-LTR_DM	3.99705	3.71397	3.89203	3.67144	3.72444	3.69116	3.78368	3.60947	3.568	3.97987	3.81312	3.56694	3.12296	4.40588	3.55108	3.92808	3.82214	3.98679	4.41814	3.50847	4.06969	3.70825	3.94331	4.06097	3.80539	4.16669	3.96381	3.17564	3.35897	2.98686	3.65355	3.82037	3.51247	4.14676	4.16171	3.89919	4.37809	3.66294	4.11528	3.29214	4.31687	3.99776	3.97757	3.61047	4.11735	4.13776	3.96814	4.14589	4.05762
COPIA2I_DM	8.3805	8.8198	8.58496	8.57206	8.58426	8.5996	8.34442	8.17095	8.69489	8.05225	8.83299	8.60954	8.81484	8.27764	8.66686	8.28912	9.11782	8.34193	8.33212	8.88956	8.11181	8.25939	8.58175	8.53132	8.81714	8.45348	8.58659	8.87976	8.62934	8.81793	8.77843	8.69209	8.47428	8.28308	8.45551	8.46856	8.31133	8.58779	8.06684	8.78825	8.58256	8.54804	8.64378	8.73524	8.18674	8.18909	8.24392	8.40196	8.41412
COPIA2LTR_DM	5.04898	4.64328	3.94105	4.76143	4.60467	4.40109	4.72898	5.65823	4.36093	3.7795	4.38938	4.4398	4.27629	4.82278	3.69203	5.73416	4.7695	5.0272	5.28677	4.52301	4.86856	3.82578	3.74348	4.73121	5.08778	4.63338	4.28173	4.44801	4.64992	4.74334	4.5331	4.3598	4.53389	4.96394	4.97002	4.93378	5.34025	4.29725	4.52264	4.53231	4.90282	4.87352	4.48904	4.58849	4.6219	4.26247	4.58576	4.82216	4.72505
COPIA_DM_I	9.01537	7.94237	7.63875	8.59949	8.81909	8.23555	8.29788	8.50961	7.82877	7.6321	7.65302	7.83284	7.39667	8.4724	7.92497	8.55934	8.11651	8.80484	9.5171	7.4005	9.25792	8.80615	8.30287	8.7711	7.8925	8.6983	7.91488	7.66842	7.70187	7.57503	8.13966	8.00777	7.82051	8.61383	8.92977	8.66298	9.09047	8.21497	9.21722	8.06116	9.25376	8.72432	8.07138	8.20214	9.41144	9.40398	8.83333	8.35309	8.60306
COPIA_DM_LTR	-0.0923078	0.255639	-1.95688	0.00459294	0.635912	-1.25659	0.666205	-1.43114	-1.27779	-0.135496	-0.867613	-1.24567	-0.67451	-0.00477182	-0.692634	-0.805894	-1.42546	0.908579	0.345628	-2.36684	0.0869635	-0.204761	-1.11974	-0.687366	-1.08095	0.164064	0.909379	-2.07178	-1.87427	-2.15373	-0.786403	-2.26027	0.372105	0.267024	0.697791	0.125297	0.690858	0.142365	-0.141359	-0.465754	1.31128	0.673368	-0.796999	-0.0952511	0.489425	0.224912	-0.266013	-0.979453	0.176883
DIVER2_I	8.01083	8.62601	8.89593	8.52657	8.458	8.6132	8.77647	8.67301	8.4015	9.33784	9.03884	8.96715	8.80292	7.98348	8.72055	8.20674	9.10859	8.24469	7.56929	9.04081	8.05707	8.37629	8.78314	7.96945	9.04117	7.75778	9.10434	8.84579	9.07153	8.9015	8.83031	8.91696	8.89778	8.08039	8.15712	8.32945	7.79063	8.64284	7.86858	8.79926	8.33664	8.23675	8.92145	8.676	7.41475	7.84003	8.03656	7.98991	8.48078
DIVER2_LTR	6.08268	6.19907	6.45658	6.0533	6.33421	6.37224	6.31464	6.12653	6.20869	6.90732	6.38716	6.31824	6.4548	5.88133	6.34944	6.0902	6.38504	6.17331	5.72722	6.30801	5.98507	6.11769	6.19154	5.88825	6.39174	6.05012	6.71893	6.2916	6.41793	6.28989	6.42238	6.37908	6.54916	6.10904	6.10947	6.1002	5.99822	6.37866	5.83991	6.36746	6.27395	6.09378	6.37377	6.47905	5.69612	5.82113	6.07495	6.01482	6.19816
DIVER_I	8.24583	9.1065	8.85928	8.46049	8.72845	8.94722	9.53414	8.70335	8.91151	9.08003	9.12106	8.89429	9.04736	8.65263	9.07121	8.56601	9.11528	8.68127	8.13619	9.07856	8.1436	9.05548	9.00405	8.51477	9.12112	8.19327	8.95381	9.16778	9.15317	9.05554	8.99859	9.23058	9.38164	8.68085	8.53565	8.31859	8.31706	8.9339	8.3927	8.61875	8.78993	8.68477	8.95455	8.76908	8.22265	7.88024	8.63346	8.55836	8.65784
DIVER_LTR	3.31658	3.14412	2.83027	2.99202	3.19314	3.12325	4.91135	4.15274	3.02374	4.10713	2.95306	2.3261	2.76634	4.53266	3.33337	3.9499	2.33069	4.02079	3.79791	2.59863	3.91262	3.78282	2.5778	3.87388	2.84047	3.66087	3.90278	2.55797	2.82799	2.61768	3.04511	2.94893	3.62349	4.18156	3.81607	3.17762	3.54142	3.00064	3.5273	1.96801	2.99048	3.67462	3.26673	2.19898	3.8785	3.30656	4.05263	4.19683	3.35858
DM1731_I	8.17633	8.82351	9.0035	8.3248	8.86391	8.69638	8.26756	7.80076	8.90132	7.81333	9.14603	9.13434	8.49255	8.08243	8.86018	8.00567	8.55172	7.85369	7.41733	8.99759	7.84305	8.54405	9.05278	8.31104	8.81686	8.18916	8.58173	9.06471	8.88665	8.83681	8.7657	9.07154	8.79923	7.97731	8.10293	7.97161	7.88095	8.79815	7.85614	8.84761	8.48224	8.33181	8.61024	8.7658	7.53268	7.69431	8.24553	7.86311	8.4133
DM1731_LTR	5.40855	5.27399	5.21461	5.08268	5.62496	5.41053	4.71802	4.50647	5.61569	4.77466	5.63391	5.24946	4.98999	5.43933	5.44084	5.26576	4.8695	5.14039	5.11056	5.28109	5.18739	5.43052	5.31318	5.39198	4.84893	5.58907	4.83746	5.22073	5.14422	5.34313	5.51559	5.34387	5.48691	5.26586	5.02978	4.87043	5.09789	5.65836	5.00519	5.38233	5.17377	5.1709	5.02284	5.6662	5.00281	4.95969	5.44965	5.27054	5.15914
DM176	9.37607	8.84084	8.39365	9.50621	9.02511	8.83729	9.67854	8.86916	8.88863	9.56587	8.95422	8.56576	8.844	9.63459	8.95717	9.55903	8.56412	9.5877	9.8934	9.02669	9.48614	9.22745	9.10304	9.81831	8.71351	9.80483	9.76664	8.71145	8.6094	8.87218	9.09579	8.8951	8.80954	9.65016	9.55139	9.432	9.59445	8.8881	9.45538	8.52648	9.78681	9.53538	9.14667	8.78437	9.83867	9.57101	9.3117	9.95787	9.31046
DM297_I	9.53489	8.22421	8.11509	9.46936	8.97701	8.47805	9.83516	9.75686	8.42739	9.09953	8.08351	8.18084	8.41025	9.54132	8.58758	9.50117	7.86466	9.524	10.0633	8.34287	9.61199	9.28839	8.60576	9.64973	8.48602	9.58363	9.46597	7.84505	8.55115	8.04738	8.58414	8.4011	8.15678	9.73763	9.40366	9.27333	9.69632	8.4608	9.93016	8.33521	9.6613	9.29291	8.4067	8.49951	10.3045	9.94096	9.34504	9.74192	9.4579
DM297_LTR	6.88118	6.23934	6.10899	6.55353	6.53224	6.54044	6.46318	6.49464	6.45622	6.20723	6.12977	6.27318	6.54744	6.33246	6.45024	6.86997	6.17801	6.53005	6.71062	6.53501	6.83913	6.79629	6.34678	6.86948	6.53872	6.65805	6.6512	5.8588	6.68173	6.13513	6.26077	6.31966	6.06245	6.86066	6.40313	6.33246	6.67322	6.44067	7.02658	6.39702	6.76234	6.50206	6.29766	6.79215	7.11268	6.89664	6.62736	6.8849	6.69352
DM412B_LTR,DM412_LTR	6.88721	6.23466	7.11013	6.63616	6.58764	6.50639	6.70305	7.18869	6.61781	7.15709	6.63512	6.85333	6.41807	6.64181	6.53006	6.47555	6.70136	6.62749	6.63849	6.53261	6.62842	6.15255	6.85346	6.63196	6.96832	6.89591	6.88478	6.35619	6.74569	6.86499	6.77929	6.72859	6.59359	6.32641	6.41971	6.90926	6.36586	6.44746	6.61682	6.4587	6.51553	6.63918	6.72537	6.90561	6.3267	6.59196	5.94615	6.47363	6.09133
DM412_I	9.61222	8.2013	8.91161	9.08564	8.86924	8.3738	9.16146	9.72529	8.59523	9.45836	8.53473	8.62268	7.9479	9.51556	8.53588	9.00266	8.4173	9.50821	9.84776	8.46444	9.33319	8.64183	8.78126	9.51419	8.79112	9.84046	9.14302	8.18122	8.33065	8.74973	8.90111	8.57359	8.51925	9.09036	9.14503	9.25891	9.28464	8.30726	9.43254	8.21445	9.30568	9.40796	8.63651	8.57671	9.74806	9.49014	8.5246	9.37069	8.69128
DMCR1A	11.1382	10.6111	10.6699	10.8146	10.8593	10.8388	10.9358	10.7453	10.7259	10.8721	10.5886	10.4831	10.8845	10.9073	10.895	10.8871	10.5561	10.9671	11.0356	10.5654	10.8684	10.8549	10.5373	10.9569	10.5761	11.0378	10.7728	10.5253	10.5467	10.5852	10.5024	10.6154	10.7222	10.9157	10.8395	10.8246	10.9005	10.7295	11.0047	10.7155	10.7959	10.9289	10.7216	10.84	11.1177	10.9681	10.916	10.9185	10.7493
DMHMR1	7.9803	8.3857	8.72288	8.32582	8.66289	9.91679	8.15044	7.95494	8.55439	7.82784	9.00485	8.7074	8.41416	8.06977	9.80708	8.14724	8.77023	8.03246	7.59287	8.76321	9.31806	8.42556	8.74556	8.29969	8.67498	7.95526	8.4142	8.97121	9.33118	8.61298	8.57873	8.6412	8.61305	8.11895	8.33387	8.47213	8.12149	8.68663	8.00756	8.55134	8.4847	8.07427	8.88451	8.75259	7.80149	7.82724	8.30073	8.13412	8.43106
DMHMR2	4.08667	4.76674	4.669	4.45937	4.87789	4.82322	4.9371	4.82839	4.78485	5.01474	3.7332	5.88193	5.2265	4.29316	4.42786	2.85356	4.65432	4.526	3.81618	4.58228	3.60559	4.12708	4.67376	4.17238	3.60134	3.39623	4.01962	3.96975	4.96596	4.98527	5.4242	4.72721	4.69085	3.6097	4.13367	4.8078	3.77376	4.86513	3.5636	6.16097	3.65217	3.60975	3.63801	6.14712	4.02118	4.48566	4.70542	3.80887	3.9532
DMLTR5	3.79404	4.5578	4.57006	4.66356	4.49855	4.36061	5.26919	4.50006	4.47523	7.21254	4.90104	4.82777	6.08808	5.2468	4.75413	4.24829	5.23151	4.18206	3.23579	4.89815	4.65552	4.23991	4.78607	4.60943	4.31461	4.10413	5.9786	4.96814	4.80523	5.03252	4.88567	4.91442	4.52438	4.02989	4.30392	4.5474	4.40641	4.42123	3.66033	4.5179	4.3677	3.6151	4.95987	4.63201	4.17765	4.35684	4.29942	4.06592	4.71642
DMRP1	5.40519	3.78291	3.89913	4.94043	3.85404	3.92592	4.90556	5.59942	3.98006	4.46587	3.78697	3.50146	3.81994	5.07656	4.14067	5.07274	3.72973	4.47973	5.29547	3.64374	5.11972	4.09525	3.80796	5.18904	3.94449	4.98218	3.90278	3.73695	3.55934	3.85595	3.15335	3.81683	3.53632	4.81484	4.57435	4.4972	4.74071	3.83205	5.32711	3.78717	3.35301	4.64093	4.05441	3.85043	5.32842	5.43353	4.77371	4.94171	4.3857
DMRT1A	8.82286	9.5451	9.80445	9.30719	9.45353	9.37344	9.27716	9.86688	9.08452	9.72036	9.9514	9.8692	9.48445	8.82843	9.5577	9.0007	9.93778	8.92505	7.9907	9.85986	8.8552	9.32379	9.83217	8.80939	10.1818	8.46714	9.77356	10.2931	9.88073	9.85734	9.60533	9.90346	9.84458	8.60503	8.85882	9.13261	8.5721	9.24914	8.56474	9.41128	9.25386	8.99075	9.48667	9.45698	8.30743	8.33129	8.86013	8.61995	8.99011
DMRT1B	9.86387	10.7591	11.1066	10.5211	10.5719	10.3756	10.4855	10.9075	10.1953	11.0907	10.9666	10.9753	10.747	10.0023	10.3625	10.1519	11.1756	9.89109	9.25145	11.2002	9.81385	10.4351	11.2164	9.92403	11.2565	9.29944	10.8447	11.0083	11.1897	10.9696	10.5154	11.1516	10.6599	9.9404	10.0307	10.407	9.86828	10.495	9.94252	10.6893	10.3461	9.83145	11.2206	10.4781	9.35408	9.74884	10.0125	9.70443	10.3674
DMRT1C	7.1884	7.82137	8.66374	8.10474	7.68351	7.82211	8.37615	8.49153	7.67137	8.71623	8.55036	8.45769	8.08391	7.47939	7.8897	7.64679	8.62188	7.33538	6.68104	8.81132	7.50644	7.69324	8.27801	7.48701	8.78706	6.71018	8.55152	8.43489	8.56363	8.43616	8.00468	8.58988	8.05358	7.36899	7.48137	7.85852	7.03151	7.69521	7.30883	8.00005	7.22167	7.41164	8.45808	8.03624	6.83166	7.08994	7.40597	7.30852	7.65159
DMSAT6	10.5896	11.2147	12.197	11.601	11.592	10.4547	11.743	12.3069	10.5361	12.1715	12.2384	12.2179	11.428	10.0991	11.2609	11.4398	12.1247	10.5277	9.25502	12.1602	10.9215	10.8996	12.1991	10.8416	12.0975	9.15086	12.4067	12.4178	12.4621	11.6994	11.3727	11.9842	11.2473	10.4738	10.6125	11.0197	10.1121	10.8961	10.2838	11.5428	10.7083	11.0211	11.9296	11.057	10.3553	9.98557	10.4671	10.0828	11.0443
DMTOM1_LTR	4.6219	3.94067	3.93069	4.49907	4.30055	4.17299	4.41007	4.29296	3.97118	4.05678	4.13675	3.84904	3.84371	4.5034	4.00848	4.38024	4.03018	4.33337	4.71432	3.95133	4.55183	4.19146	3.96114	4.63694	3.9684	4.60118	4.29536	4.04561	3.89531	3.72956	3.75553	4.13945	3.80327	4.57456	4.42588	4.31629	4.59049	4.07256	4.63207	3.90264	3.98081	4.38303	4.11944	4.17404	4.91131	4.70665	4.30356	4.56884	4.2839
DNAREP1_DM	10.8994	9.30686	9.5482	10.4866	9.76678	9.63184	10.803	10.5911	9.45834	10.1395	9.38042	9.24034	10.2025	10.5519	9.59508	10.6819	9.32358	9.7605	10.5311	9.42895	10.7481	9.79577	9.42402	10.5061	9.54303	10.3819	10.0306	9.36138	9.36717	9.5264	8.93588	9.55744	9.15158	10.3807	10.137	10.3403	10.3165	9.64579	10.8575	9.50823	8.70534	10.122	9.67107	9.73964	10.9396	10.9505	10.3091	10.5153	9.96035
DOC	10.1223	10.7048	10.7167	10.4519	10.4184	10.8559	10.8776	10.5414	10.778	10.9441	10.8157	10.5852	10.8215	10.2708	10.6897	10.2298	10.8416	10.3955	9.96036	11.0063	10.2767	10.4395	10.7342	10.7097	10.9282	10.2838	11.1261	10.7872	10.9086	10.3795	10.6367	10.7793	10.8929	10.4819	10.4999	10.3851	10.4399	10.6033	10.116	10.458	10.7789	10.5383	10.9345	10.5636	10.2637	10.147	10.2241	10.3104	10.66
DOC2_DM	8.76217	9.05542	9.2862	8.78959	9.10123	9.06953	9.25846	8.55417	9.09247	9.25459	9.25795	9.20726	9.26856	8.75052	9.12505	8.77848	9.16329	8.65824	8.51756	9.2347	8.59072	9.03723	9.15992	8.75833	9.08512	8.74534	9.39862	9.09841	9.2093	9.20452	9.06684	9.13093	9.42364	8.71059	8.65083	8.66847	8.60216	9.36892	8.68776	9.05938	9.01366	8.75019	9.10989	9.30377	8.47376	8.47451	8.80067	8.66413	8.86206
DOC3_DM	9.38618	9.72036	9.82056	9.45887	9.58782	9.7093	9.80135	9.18951	9.7126	9.63408	9.78301	9.77408	9.85532	9.09076	9.72236	9.26518	9.7448	9.41441	9.20774	9.65354	9.24106	9.62647	9.63909	9.32871	9.67573	9.35255	9.881	9.76847	9.6758	9.71114	9.5484	9.71847	9.71829	9.26778	9.34945	9.2911	9.23046	9.67533	9.2216	9.68442	9.61973	9.33845	9.68951	9.76345	9.0533	9.09701	9.33474	9.1617	9.3762
DOC4_DM	6.98733	6.84862	6.99876	6.90509	6.703	7.08928	6.81016	6.97591	6.94101	6.61045	6.97429	6.97371	6.7967	6.41521	6.93708	6.71589	6.96416	6.80949	6.8371	6.88216	6.76613	6.92945	6.89997	6.82016	6.97964	6.78063	6.76048	6.95479	6.91891	6.97574	6.62616	7.00116	6.86615	6.72457	6.67123	6.76145	6.6474	6.92468	6.92939	6.93276	6.41746	6.65132	6.8605	7.01743	6.70856	6.84384	6.65438	6.74777	6.66706
DOC5_DM	8.24225	7.43868	7.38371	7.95772	7.93593	7.59504	8.52878	8.29366	7.48612	8.2449	7.44369	7.23372	7.38942	8.38094	7.71566	7.94491	7.32404	8.16856	8.49152	7.2953	8.14861	7.72998	7.49276	8.16975	7.4671	8.25969	8.24817	7.27151	7.23678	7.21457	7.36949	7.52804	7.56749	8.20415	8.05005	7.91928	8.10998	7.47811	8.19045	7.42266	8.02402	7.98854	7.59817	7.53014	8.30334	8.2624	8.13401	8.26875	7.96387
DOC6_DM	7.72003	6.88641	6.88122	7.9114	7.4546	7.01112	7.22745	7.01543	6.59884	7.01064	6.23508	6.72533	5.88048	7.83872	7.20511	7.30907	6.58647	7.47296	7.78628	5.88028	7.44058	7.40682	7.09711	7.81926	6.49138	8.09201	7.33873	7.09279	6.00995	7.03425	7.01632	6.15559	6.37828	7.10412	7.48579	7.10472	7.937	6.68466	7.5352	6.6047	7.19707	8.02652	6.54036	6.81883	8.24704	8.22405	8.03904	7.77736	6.91912
FB4_DM	8.89798	7.55094	7.60221	8.46387	7.95029	7.94339	8.2412	8.72174	7.6381	8.87917	7.66683	7.49882	8.12506	8.88239	7.932	8.96462	7.48302	8.80685	8.55361	7.497	8.75246	8.36889	7.45959	8.55679	7.51524	8.68576	8.02039	7.41829	7.67862	7.54942	7.36968	7.65192	7.44813	8.75775	8.51401	8.34149	8.8062	7.781	9.02671	7.72791	7.62988	8.33687	7.606	7.71719	9.29536	9.13207	8.44087	8.66819	8.2257
FROGGER_I	4.32984	4.9803	5.20461	4.93512	5.03648	5.23718	4.16895	3.86052	4.70945	4.16312	4.74904	5.31191	4.57402	4.85071	4.80031	4.62523	5.26229	5.17042	4.36331	5.1649	4.97404	5.00463	5.12983	4.94441	5.26556	4.59551	4.27486	5.11764	5.11482	5.06457	4.58427	5.21532	4.68446	4.83165	4.61877	4.35797	4.80318	4.66109	4.26972	4.62939	4.85751	4.49038	4.99495	4.72923	4.25353	4.25432	4.7757	4.35405	4.96662
FROGGER_LTR	1.90654	1.95808	1.78516	1.93899	1.88499	1.79926	2.14974	1.74982	1.50212	1.96762	1.42985	1.33644	1.24027	2.00213	1.88404	2.01849	1.39718	2.8216	2.11823	1.41284	2.56063	1.73511	1.57805	2.07755	1.81452	2.38325	2.28195	1.2853	1.18715	1.47594	1.68549	1.48821	1.3285	2.34319	2.04465	1.70591	2.11731	1.55143	1.75655	1.30222	2.60322	1.96829	1.74524	1.54581	1.85855	1.74534	2.3175	1.92222	2.24327
FW	11.1106	11.7216	11.5734	11.2445	11.5681	11.5964	11.6553	11.5503	11.5047	11.9674	11.6379	11.6428	11.857	11.1503	11.3883	11.2054	11.7234	11.0777	10.8349	11.6579	11.2016	11.4378	11.6463	11.0437	11.6955	11.2335	12.0559	11.7549	11.7505	11.6565	11.6571	11.8177	11.7856	11.157	11.1672	11.2257	11.173	11.5809	11.0951	11.3974	11.6072	11.0936	11.7685	11.5907	10.888	11.071	11.0541	10.9366	11.3087
FW2_DM	6.34387	6.37737	6.39633	6.3845	6.23657	6.48189	6.47527	6.16354	6.41057	6.42289	6.40947	6.48111	6.40668	5.80002	6.50343	6.08907	6.2629	6.27787	6.35911	6.24924	6.18984	6.40889	6.32698	6.40052	6.30989	6.54631	6.31272	6.43335	6.26255	6.23829	6.10998	6.32091	6.2091	6.28319	6.31401	6.11537	6.21703	6.37866	6.25587	6.26883	6.38807	6.24561	6.42612	6.38826	6.34807	6.19439	6.276	6.18277	6.27675
FW3_DM	5.6026	5.95489	5.76351	5.69702	5.45036	6.0987	5.83423	5.37118	5.74761	5.69076	5.88364	5.95713	5.73769	5.35683	5.87291	5.44546	5.88851	5.40292	5.43691	5.8603	5.43749	6.10902	5.85252	5.68397	5.85319	5.65329	5.66877	5.85206	5.82003	6.09184	5.58682	5.8457	5.59644	5.46241	5.58728	5.51088	5.53297	5.64389	5.67726	5.73284	5.38301	5.45117	5.85396	5.72225	5.47775	5.41463	5.52965	5.44543	5.4708
G2_DM	8.08718	8.89449	9.41061	8.72302	8.9209	8.79894	9.18712	8.77752	8.71788	8.91263	9.32375	9.13704	9.1066	8.55535	8.78498	8.58725	9.18713	8.25935	7.69075	9.29006	8.28413	8.71304	9.11444	8.52733	9.33222	8.23082	9.36851	9.48213	9.46098	9.12788	9.30367	9.10468	9.07388	8.2319	8.43225	8.33838	8.14457	8.82646	8.24064	8.83375	8.39879	8.22343	9.14947	9.08583	7.66552	8.00601	8.28876	8.1082	8.6432
G3_DM	6.47842	6.06313	6.1909	6.02693	5.98707	6.11675	6.44667	5.99125	5.98607	6.10325	6.10793	6.04325	6.02573	5.83902	6.08779	6.181	6.06763	6.13471	5.98703	6.00683	6.14123	6.01856	6.01328	6.23495	6.09321	6.24075	5.95231	5.93499	6.1148	5.98014	5.75087	6.09842	5.99865	6.03468	6.04454	5.85495	5.93707	5.92319	6.23211	6.10213	5.78233	5.9602	6.03867	6.1303	6.11006	5.92876	6.13703	5.99238	5.9567
G4_DM	7.62402	7.03882	6.88032	7.35222	7.11791	7.19639	7.44965	7.13414	7.03746	7.03736	6.85716	6.81026	6.80278	7.32351	7.1733	7.41197	6.80691	7.48589	7.8223	6.81899	7.34314	7.22921	6.91193	7.43902	6.8964	7.65804	7.19372	6.89246	6.74295	6.92882	7.02822	6.95642	6.8227	7.53256	7.41552	7.29077	7.52265	7.07922	7.55299	7.0544	7.34413	7.39466	7.0806	7.11562	7.7616	7.61146	7.41094	7.55098	7.21808
G5A_DM	7.4037	7.53984	7.66244	7.45633	7.33327	7.60992	7.1833	7.01093	7.48845	6.89855	7.70457	7.69245	7.47269	7.13107	7.47074	7.15503	7.69526	7.07308	7.14796	7.69072	7.2108	7.4018	7.56421	7.26254	7.74543	7.21945	7.22106	7.69482	7.62302	7.61157	7.43583	7.73633	7.47891	7.20563	7.16267	7.24669	7.0778	7.5161	7.22598	7.44461	7.15407	7.09798	7.59532	7.53852	7.02425	7.19097	7.22484	7.19506	7.27287
G5_DM	7.61561	8.1794	8.50991	7.96106	7.96252	8.12266	7.77224	7.87289	8.21902	7.70118	8.53931	8.24776	8.15466	7.75016	8.21461	7.83127	8.56515	7.84969	7.35677	8.52098	7.72979	8.05718	8.26873	7.75633	8.38767	7.52501	8.00354	8.45714	8.34639	8.2172	8.2678	8.28996	8.55426	7.63413	7.70433	7.87545	7.61108	8.15739	7.5713	8.37817	7.85065	7.87943	8.4067	8.34766	7.41662	7.50102	7.70589	7.58583	7.8746
G6_DM	6.61353	6.76061	7.42584	6.85273	7.19842	7.34902	6.30075	7.05427	6.96636	7.4396	8.10218	7.15001	7.3759	6.64245	6.46333	6.57692	7.15495	6.60611	5.93784	7.69905	6.75804	7.06897	7.72314	6.60894	7.90313	6.222	8.54583	7.84717	7.3019	7.55507	6.97094	7.41317	9.0934	6.70473	6.3919	6.69444	6.21772	6.72216	6.2368	7.58137	7.06718	7.24836	7.01322	7.36091	5.87803	6.9599	6.56832	6.57515	7.14428
G7_DM	3.01376	3.31347	3.54769	3.18322	3.28283	3.34496	2.90474	2.7278	3.34906	3.37402	3.44625	3.5148	3.40441	3.08706	3.37013	2.92648	3.69631	2.97091	2.44205	3.58002	2.96411	3.14988	3.37445	2.77207	3.41089	2.79327	3.0279	3.60676	3.45148	4.39887	3.25727	3.3816	3.4026	2.95558	2.8155	3.2543	2.90911	3.36947	2.74847	3.47809	2.78581	2.85167	3.63801	3.54193	2.52071	2.75441	2.90237	2.81046	2.94942
G_DM	7.01551	8.76669	8.67801	8.59571	7.96988	8.02813	8.25804	8.51068	8.71547	8.26487	8.32395	8.69	7.89996	7.52742	7.81169	7.33274	8.2527	7.49499	7.3513	8.76	7.24489	7.5092	8.53994	7.60071	8.49119	6.58369	8.22031	9.37026	9.09404	8.45415	8.31187	8.70997	9.09931	7.18477	8.26897	8.47095	7.98132	8.97621	7.6196	7.58013	8.24814	7.1386	9.26389	8.0792	7.00738	7.37108	7.78951	7.39894	7.92703
GTWIN_I	7.04423	7.06378	7.34715	6.87214	7.18343	7.67228	7.56027	7.9759	7.47183	6.62913	7.07633	7.19731	7.07875	6.58741	6.81075	7.34038	6.97929	7.24144	6.99205	7.29282	6.22065	7.44521	7.14899	7.1241	7.58553	6.56929	7.47299	7.45909	7.70892	7.60803	6.94808	7.47034	7.8692	6.98109	6.56533	6.90652	6.66878	7.65293	6.82269	7.82186	7.12286	6.73219	7.10739	8.02027	7.15462	7.02459	7.10552	6.22995	7.25675
GTWIN_LTR	4.24889	4.60571	5.03755	4.58366	4.46061	5.07628	4.32159	4.88858	4.54569	3.66522	4.6773	4.99412	4.40221	4.31096	4.07956	4.69646	4.65818	4.64986	3.81011	4.63475	4.09494	4.67334	4.60963	4.07901	4.9644	3.84908	4.26104	4.63054	5.11624	5.11467	4.27007	4.80253	4.97532	4.65946	4.22485	4.67707	4.32682	4.79319	4.19167	5.17615	3.84178	4.25203	4.60994	5.24256	4.12127	4.4077	4.34971	3.77879	4.39171
GYPSY10_I	7.71275	7.60112	7.68085	7.6387	7.43546	7.845	7.63692	7.8129	7.56088	7.92874	7.76945	7.54289	7.68129	7.29208	7.62209	7.47786	7.28991	7.5941	7.59265	7.10792	7.43304	7.61911	7.35151	7.38351	7.36796	7.57362	7.67724	7.64764	7.60526	7.59377	7.61168	7.50842	7.64054	7.48482	7.47997	7.56946	7.41661	7.43779	7.82961	7.50171	7.19831	7.72015	7.6431	7.53544	7.72724	7.61973	7.52918	7.58995	7.44064
GYPSY10_LTR	4.05385	5.03785	5.46978	5.08161	4.62297	4.86378	5.20939	5.35468	4.50167	6.24578	5.66296	5.5796	5.09867	4.41638	4.73752	4.37032	5.31339	4.44354	3.90701	4.99731	4.16313	4.4807	5.17637	3.90792	5.26556	3.85621	5.98001	5.53056	5.46365	5.36455	5.148	5.19909	5.28215	4.28121	4.38998	4.85194	4.00475	4.6247	4.35933	5.01685	4.26576	4.70894	5.26482	4.75368	4.0748	4.08174	4.22126	4.10161	4.68229
GYPSY11_I	6.21427	3.70046	4.84675	4.83862	5.56207	5.55505	5.06113	4.64475	4.52915	4.36761	4.10535	4.04255	4.09806	5.26849	4.56198	5.75385	3.95681	5.78154	5.35705	3.96208	5.06225	5.04761	4.11561	4.97729	4.26077	5.44269	3.82972	3.7296	4.80873	4.22977	4.09835	4.17583	5.09895	5.02141	4.85335	4.70899	5.08728	4.03145	5.99773	4.87377	4.6167	5.12634	4.17403	4.93834	6.13777	5.23453	5.89261	5.11547	4.75464
GYPSY11_LTR	4.07722	3.39123	3.33358	3.67569	3.67072	3.53363	3.07249	3.77806	3.60864	2.79859	3.48472	3.35096	3.29603	3.69679	3.56304	3.94322	3.38283	4.02209	3.9978	3.37	4.12235	3.61336	3.14407	3.68041	3.35757	4.13965	2.73298	3.39569	3.34457	3.49613	3.15335	3.33781	3.56442	3.65658	3.72091	3.67093	3.67699	3.5276	3.88131	3.54462	3.01695	3.69897	3.37056	3.69813	4.18517	3.8374	3.83325	3.9288	3.41077
GYPSY12A_LTR	7.25011	6.20446	6.46019	6.78436	6.58298	6.57581	6.64924	6.69238	6.39364	5.83564	6.48935	6.30807	6.59723	6.90628	6.49123	7.00176	6.43824	6.3491	7.03068	6.45608	6.9538	6.62648	6.43747	6.91107	6.53673	6.91625	6.11745	6.26137	6.34082	6.44507	6.02562	6.60061	6.06736	6.94214	6.59776	6.74567	6.82873	6.45162	7.16466	6.42819	5.71522	6.50018	6.57989	6.57864	7.23652	7.17389	6.77043	6.94946	6.60127
GYPSY12_I	8.85083	8.79349	8.97908	8.73867	8.92541	8.96436	8.50729	8.95611	8.72028	8.48753	9.06163	8.84091	8.95286	8.25232	8.85775	8.70691	8.97571	8.42223	8.4018	9.11425	8.36324	8.80066	9.035	8.93664	9.15157	8.91539	8.84622	9.19119	9.22618	8.7882	8.6479	9.04342	8.76873	8.55332	8.57757	8.6043	8.54008	8.79467	8.69152	8.95001	8.63568	8.51703	8.8347	8.89653	8.63122	8.4829	8.69469	8.64618	8.79041
GYPSY12_LTR	7.16268	6.9715	7.02863	6.91919	7.12863	7.09605	7.77105	7.61284	6.83399	8.70574	7.04725	7.01105	7.69235	7.27672	7.00694	7.10467	7.02114	6.95323	6.8412	7.0423	6.93277	6.96111	6.97473	6.93178	7.21729	7.08469	8.13775	7.0081	6.83383	6.91781	6.87514	7.11544	7.19305	7.04535	6.96222	6.95254	7.20952	6.92243	7.02604	7.01131	6.93288	6.94043	7.08366	7.09991	7.23366	6.94934	7.06988	6.98695	7.05286
Gypsy1-I_DM	7.61179	7.92523	8.05093	8.20534	7.50289	8.51727	7.72511	8.06789	7.74108	8.203	8.52965	7.88041	8.32516	7.59552	7.15876	7.90733	8.82355	7.34083	7.36429	8.80425	7.38077	8.00128	8.32387	7.57506	7.86887	7.03026	8.09325	7.9161	8.18787	7.99122	8.18372	7.86745	8.08018	7.74497	6.82495	7.80176	7.3624	8.28616	7.13117	8.57466	8.17047	8.22536	8.92983	8.12165	7.63449	7.4643	8.19736	7.55775	8.03494
Gypsy1-LTR_DM	4.63126	4.30002	4.57229	5.04102	3.76529	4.58634	3.96523	4.72029	4.03007	3.86302	4.72857	3.93422	4.04437	4.03145	3.85324	4.72009	4.60515	3.67969	4.302	4.56828	4.01782	4.14415	4.37704	3.54235	4.14314	3.85621	3.78211	4.51786	4.36129	4.48787	4.31583	4.2032	4.39212	4.1926	3.78756	4.56399	3.93291	4.74145	4.00853	4.89783	3.88553	4.33916	5.00144	4.6254	4.18392	4.38399	4.17074	3.96799	4.47083
GYPSY2_I	8.35981	8.64124	8.77669	8.62076	8.49545	8.56088	8.0976	8.76073	8.47899	8.07603	8.89335	8.97641	8.47725	8.19694	8.57619	8.31514	8.97329	7.98331	7.94873	9.06886	8.28759	8.3572	8.79611	8.42955	9.00466	8.08886	8.55837	8.97024	8.72394	8.72357	8.53446	8.97281	8.81491	8.15498	8.29992	8.47598	8.14228	8.73213	8.24937	8.67018	8.21453	8.2459	8.89297	8.70362	7.77183	8.1932	8.1942	8.18677	8.34369
Gypsy2-I_DM	8.66473	8.52769	8.65865	8.32695	8.04249	8.85379	8.40617	8.89812	8.3903	8.91997	8.11713	8.5977	8.37583	7.94863	8.45632	8.23948	8.26953	8.51147	8.25013	8.61439	8.04374	8.08802	8.58635	8.381	8.53622	8.47392	8.96692	8.20441	8.408	8.79839	8.04962	8.9182	8.5185	8.19668	8.16631	8.01662	7.98658	8.61204	8.39196	8.48606	8.40059	8.13845	8.23001	8.12399	8.29119	8.42163	8.53455	8.12294	7.99687
GYPSY2_LTR	4.33337	4.56528	4.53399	4.52913	4.43322	4.446	3.66541	4.64862	4.41103	3.76026	4.90104	4.57751	4.47706	4.41039	4.36324	4.50226	4.89918	4.17279	4.06552	5.08025	4.43388	4.26614	4.52104	4.437	4.94846	4.25572	4.13024	4.83594	4.49553	4.4525	4.38407	4.73286	4.87042	4.29205	4.35755	4.56948	4.33901	4.82079	4.36791	4.64463	4.16791	4.13941	4.79798	4.72305	3.97131	4.30885	4.14327	4.31371	4.37043
Gypsy2-LTR_DM	6.54108	5.78843	6.13104	6.16607	5.27116	5.98791	6.21601	6.52971	5.81428	6.48864	5.65696	6.22395	6.37223	6.02355	5.79057	6.30469	5.84681	5.59835	5.65888	6.09821	6.01218	5.93356	6.11794	5.98184	5.93434	5.7643	6.60724	6.07698	6.00919	6.36621	5.49928	6.21798	5.81005	5.75849	5.7979	6.33197	5.78216	5.89902	6.44952	5.88743	5.25464	6.12893	5.77669	6.02186	6.35864	6.41022	6.11283	6.09117	5.59399
GYPSY3_I	6.57655	7.12101	7.60357	6.97039	7.03036	7.07625	6.81608	7.20357	6.94923	6.95991	7.62623	7.67275	7.13762	6.92111	7.36175	7.08925	7.45581	6.64751	6.60343	7.61525	6.65659	7.07045	7.47052	6.91646	7.55526	6.74967	6.5778	7.49417	7.64032	7.54201	7.3111	7.26257	7.48351	6.82416	6.91412	6.95965	6.59058	7.00402	6.69422	7.46515	7.20696	6.98257	7.47352	7.14509	6.34528	6.31567	6.58742	6.63641	6.74425
GYPSY3_LTR	1.76717	2.88809	2.88856	2.34685	2.26237	2.65347	2.55652	1.90033	2.51414	2.71114	2.78707	2.85264	2.59021	2.56826	2.50857	2.04991	2.69642	2.54069	1.98468	2.42298	1.77992	2.48089	2.51158	1.86034	2.7787	2.09234	2.30009	2.24437	2.5964	2.74005	2.82711	2.67163	2.90577	2.11562	2.24269	2.22693	2.30693	2.53559	1.95175	2.7169	2.91206	2.31661	3.01659	2.65994	1.69961	1.3581	2.30653	2.25066	1.96503
GYPSY4_I	9.03415	8.9997	8.92135	8.92377	9.00189	9.29	8.87098	8.46748	8.92062	8.68182	8.89679	8.99259	8.94162	8.82527	9.07904	8.75728	8.76866	9.07851	9.02871	8.75743	8.93395	8.98271	8.79002	8.96235	8.93697	8.99923	8.88251	8.92707	8.8911	9.00088	8.9177	8.94114	9.10898	8.97846	9.07924	9.008	9.15085	8.9497	8.93275	9.04113	9.04633	9.10356	9.03457	9.0216	9.08576	9.03291	8.83065	8.80519	8.95167
GYPSY4_LTR	4.86773	5.48968	5.75276	5.25916	5.31809	5.53786	4.84336	4.63697	5.13312	4.9819	5.76585	5.93084	5.32885	5.26849	5.25005	5.03083	5.72505	5.15165	4.6445	5.64588	5.05415	5.07754	5.5306	4.80583	5.70807	4.74651	4.95949	5.48223	5.4955	5.61277	5.58746	5.66947	5.61783	5.0823	5.18138	5.42726	5.09449	5.52751	4.80436	5.53535	5.12419	5.09991	5.69638	5.32544	4.59675	4.84551	4.92661	4.75033	5.2016
GYPSY5_I	6.68269	5.45388	5.714	6.42208	6.00501	5.86789	6.26051	6.65292	5.44024	5.14466	5.52078	5.38272	6.25394	6.41109	5.71579	6.41711	5.26609	5.64606	6.99706	5.40447	6.7948	6.24843	5.34476	6.98912	5.11124	6.32374	6.17695	5.20361	6.00386	5.94838	4.88985	5.5562	5.01997	6.53126	6.6179	6.59838	6.74574	6.03694	7.07282	5.45872	5.7696	6.6338	5.84798	5.3775	7.62162	7.19161	6.51184	6.78059	5.98251
GYPSY5_LTR	2.8183	3.02449	3.57457	2.94586	3.23604	3.12785	3.76676	3.87381	2.00664	2.8721	3.74683	3.29021	5.21501	2.82406	2.66836	2.91287	4.21197	1.27222	2.46538	3.19267	2.95543	3.31979	3.10611	3.28256	2.88302	1.68545	4.78528	2.90939	4.45588	4.43129	1.72344	3.25652	2.87618	3.08212	3.19422	3.56453	2.6639	4.1282	2.9424	3.1971	2.10082	2.99621	3.25231	2.56642	3.80393	3.25194	2.70349	2.70562	2.62947
GYPSY6A_LTR	6.47802	6.49945	6.79765	6.44963	6.6823	6.56525	6.30807	6.41786	6.55384	6.78358	6.76248	6.77513	6.77111	6.59305	6.5602	6.69492	6.81168	6.35629	5.98703	6.88027	6.55275	6.43167	6.73874	6.35683	6.69079	6.18091	6.52815	6.72859	6.74843	6.5818	6.39728	6.67826	6.5585	6.43271	6.35392	6.63361	6.29748	6.63247	6.3979	6.75363	6.0547	6.30894	6.77289	6.81991	6.16529	6.35355	6.37383	6.41175	6.41761
GYPSY6_I	8.12889	8.54315	8.74721	8.24371	8.1197	8.80326	7.95992	8.46432	8.67051	8.10634	8.74715	8.68951	8.48791	7.95289	8.50916	7.88682	8.95349	8.01788	7.87134	8.77736	8.12622	8.29039	8.5664	8.24838	8.76902	8.01187	8.11631	8.86172	8.97763	8.88745	8.4418	8.59441	8.87564	8.2805	8.43578	8.47014	8.2296	8.49105	8.03117	8.37732	8.52617	8.03715	8.81505	8.33392	7.97394	7.98517	7.97456	7.82993	8.39762
GYPSY6_LTR	3.80935	4.91306	5.18148	4.56851	4.50294	4.94164	4.06031	4.92256	4.97891	4.961	5.14016	5.17301	4.76203	4.62869	4.58269	4.43125	5.43769	4.40445	3.93234	5.50102	4.35356	4.34946	4.9822	4.2758	4.96242	3.7732	4.66967	5.16739	5.05269	4.96178	4.88985	4.97285	5.14775	4.45185	4.62473	4.97194	4.4905	5.00334	3.91448	4.72572	4.87931	4.36602	5.66948	4.65653	4.00569	4.1055	4.73844	4.37432	4.6007
GYPSY7_I	7.69209	7.36564	7.1829	7.47443	7.85523	7.53091	7.56732	6.63351	7.25993	7.2475	7.22048	7.03632	7.31188	7.22666	7.59724	7.44411	7.21092	7.58942	7.70491	7.00596	7.55118	7.61988	7.22991	7.68934	7.21521	7.59065	7.38089	7.12742	7.14281	7.22108	7.10346	7.24654	6.76685	7.5369	7.41762	7.27574	7.44716	7.34018	7.60498	7.33434	7.58462	7.72201	7.3549	7.4346	7.87502	7.52611	7.45987	7.60974	7.36253
GYPSY7_LTR	3.10341	3.32232	3.49237	3.05644	3.73943	3.34496	3.33894	2.3632	3.35248	2.9335	3.634	3.41874	3.57692	2.91997	3.51461	3.26855	3.34019	2.93295	2.92404	3.33182	3.32021	3.64968	3.32021	2.87398	3.30845	3.21937	2.89693	3.37231	3.23952	3.6908	3.09663	3.40537	2.63249	3.10443	2.90228	2.9367	2.79078	3.46312	2.99207	3.33035	2.82486	2.85348	3.46741	3.61382	2.83305	2.90152	3.3919	3.18549	2.97097
GYPSY8_I	6.8553	7.24778	7.88121	7.38113	7.0254	7.10949	8.25112	7.95904	6.8907	8.6359	7.79373	7.9469	7.79933	6.72895	7.10866	7.075	7.8889	6.5481	5.86589	8.04124	6.96484	6.90086	7.84604	6.88702	8.1002	5.91313	8.4423	7.86089	7.84239	7.75572	7.24983	7.84612	7.40442	6.69599	6.76161	7.32154	6.39042	7.04899	6.72793	7.31302	6.44557	6.75668	7.75669	7.12121	5.89533	6.51695	6.59814	6.68163	7.13987
GYPSY8_LTR	4.67161	4.58747	5.72303	4.75676	4.31563	4.23615	5.32517	5.59741	4.09281	5.42061	5.24793	5.1575	4.473	4.01969	4.5866	5.02689	5.34728	4.04133	3.18985	5.39524	4.77791	3.93772	5.46462	4.29061	5.61394	3.46319	5.40417	5.50606	5.54882	5.10666	4.56219	5.29126	4.81106	4.33304	4.43182	5.09403	3.86798	4.2286	4.26606	4.77158	3.72048	4.10793	4.90098	4.56451	3.48243	4.19509	3.92037	4.17274	4.66893
GYPSY9_I	6.3039	5.98237	6.188	6.23967	6.25037	6.14653	5.94885	5.80252	6.06119	5.58131	6.15129	6.08184	5.77277	5.84291	6.20941	6.04335	6.12876	5.84534	6.15963	5.99641	6.08894	6.11336	6.18548	6.04482	5.83596	6.38464	5.54776	6.20028	6.09558	6.27983	5.71127	5.86982	5.78638	6.0295	6.05319	6.03132	5.9964	6.03347	6.26324	6.06578	5.74549	5.96125	6.06263	6.15	6.27507	6.22244	6.1081	6.08842	6.02747
GYPSY9_LTR	2.69737	2.27311	2.42025	2.53634	2.44718	2.36473	1.40645	1.74982	2.15513	1.15635	2.49566	2.37567	2.13087	2.99396	2.30057	2.52722	2.53774	1.79786	2.53319	2.34845	2.88403	2.36917	2.34773	2.25728	2.27704	2.83239	1.10783	2.20256	2.08655	2.46737	1.90781	2.42424	2.12935	2.48785	2.36168	2.56178	2.31734	2.45498	2.77451	1.84141	1.63797	1.94473	2.0916	2.40598	2.81053	2.72875	2.48253	2.63684	2.42045
GYPSY_I	8.23206	8.55938	8.15756	8.48294	8.07239	8.00659	7.65255	8.75187	8.43548	6.82003	8.71789	8.74077	7.9231	7.73959	8.04642	7.74486	8.7624	7.80282	8.12127	8.27209	8.22651	8.54606	8.50192	7.905	8.37001	7.71802	8.15265	8.63994	8.27999	8.62178	8.38862	8.56068	8.25364	7.8826	7.73665	8.05909	7.43151	8.60529	8.58516	8.75757	8.62819	8.00542	8.08619	8.25663	7.76327	8.17481	7.74564	8.19726	8.0831
GYPSY_LTR	4.78627	4.97048	4.00832	4.88768	4.35022	4.27815	4.07068	5.24512	4.83342	2.54124	5.30587	5.14469	4.24093	4.19897	4.19801	4.20428	5.43994	4.36018	4.86518	4.35369	4.96181	5.15959	4.67808	4.36601	4.55202	4.14549	4.73448	5.08637	4.32995	4.79242	4.91672	4.82209	4.70565	4.43777	4.11576	4.56399	3.81476	5.00334	5.48407	5.27987	5.24747	4.63988	4.32641	4.40578	4.04617	4.93134	3.99401	4.98978	4.68927
HELENA_RT	5.60918	5.39637	5.58663	5.47933	5.44694	5.76013	5.25561	4.98209	5.56201	4.87196	5.56505	5.50471	5.438	4.97872	5.57086	5.41381	5.6131	5.37892	5.53573	5.53383	5.27779	5.61735	5.40594	5.66476	5.65135	5.46853	5.00306	5.49636	5.63911	5.37681	5.11358	5.65962	5.25654	5.50822	5.45182	5.50304	5.54299	5.38359	5.60073	5.6013	5.37426	5.41825	5.61556	5.62454	5.51999	5.49742	5.54139	5.46446	5.43441
HELITRON1_DM	0.703506	1.07824	0.958815	0.502424	0.698608	0.788096	0.245376	0.151224	0.879954	0.0659307	0.822446	0.593162	0.631546	0.409904	0.890773	0.716022	0.944871	0.897358	0.533934	0.796458	0.374295	0.610096	0.847552	0.714544	1.21207	0.539917	0.227034	0.922902	0.928541	0.203657	0.434566	1.03119	0.74382	0.8806	0.691942	0.594703	0.574119	0.895193	1.41632	0.746107	0.495167	0.907288	1.28855	0.881964	0.713983	0.447128	0.716641	0.459322	0.750779
HETA	9.47056	8.86233	9.56317	9.29329	8.77329	8.74717	10.1943	9.93387	8.72928	9.12372	7.97138	10.44	8.79217	9.12329	8.77023	8.90061	8.82451	8.42943	10.4064	8.96567	8.17782	8.89277	9.45022	9.06628	8.18619	9.07325	9.03155	8.63492	8.59452	9.10008	9.19537	8.99029	8.91448	8.44261	9.1732	9.7657	9.15385	8.52489	8.76293	10.154	8.04805	8.06562	8.48262	9.86851	8.93181	9.79498	9.6756	9.34708	8.27413
HETRP_DM	7.16045	6.06445	5.92279	5.00433	5.62999	5.93046	5.96377	5.76377	5.63268	4.88533	5.89898	5.2468	6.72536	6.83033	6.197	7.55846	5.98162	5.02848	6.31378	6.73894	5.952	6.52314	6.64642	6.20123	5.16396	5.30345	6.05003	6.12673	6.2257	5.44508	4.92081	5.98313	3.23788	5.87912	5.9238	6.22316	5.81216	6.79887	6.42055	6.40655	6.15642	6.52777	4.98844	5.47815	6.74654	6.0389	6.00967	6.7104	6.10375
HMSBEAGLE_I	8.50441	8.644	8.33786	8.95739	8.62984	8.66922	9.06861	8.63448	8.79921	10.3326	8.6716	8.51481	9.34732	9.17275	9.08086	8.60944	8.86998	8.51181	8.51442	8.6274	9.08784	8.7712	8.64379	9.28997	8.44063	8.96444	9.20376	8.85773	8.57589	8.82293	8.79482	8.87193	8.50436	8.52686	8.88282	8.81601	9.05164	8.56421	8.6169	8.49305	8.75799	8.29381	8.93591	8.65018	8.99294	9.21984	8.56988	8.71804	8.91898
HOBO	8.37917	7.84689	7.57944	7.50679	7.93104	8.02197	7.64084	7.66563	7.44042	8.27803	8.38914	7.54992	7.78784	8.06525	7.76512	7.84387	7.12212	8.2388	8.08455	7.243	7.98523	7.82811	7.61325	7.92057	7.56084	8.04034	7.74337	7.60163	7.79705	7.84907	8.41966	7.29728	8.00142	7.61866	7.61261	8.15859	7.72797	7.51735	8.19582	7.4638	8.3647	8.20434	7.53998	7.85441	7.95976	8.11124	7.83602	7.77469	7.96768
IDEFIX_I	9.5321	8.66045	8.31662	9.47119	8.9899	8.4165	9.32459	9.1072	8.46493	8.79381	8.16297	8.12595	8.01004	9.62459	8.57127	9.48304	8.13482	9.73726	10.0252	8.33203	9.58167	8.97339	8.30339	9.66926	8.33921	9.91542	9.08566	8.05987	8.36599	8.09149	8.65321	8.51785	8.1421	9.70105	9.55552	9.35884	9.70203	8.30453	9.50281	8.28136	9.48736	9.68112	8.4704	8.38066	10.1206	9.87838	9.54257	9.6614	9.35448
IDEFIX_LTR	7.06205	6.66775	6.2358	7.09222	6.91298	6.42834	7.06413	7.14103	6.55049	6.99633	6.24231	6.20419	6.39359	7.42005	6.78738	7.07919	6.23214	7.22835	7.50226	6.41166	7.34868	6.80392	6.41436	7.26047	6.35518	7.40464	7.2058	6.22071	6.35287	6.22664	6.47895	6.53318	6.33067	7.32105	7.14103	7.04182	7.29878	6.55868	7.00433	6.48805	7.11806	7.19336	6.67759	6.69803	7.42617	7.4	7.12067	7.25857	6.95152
I_DM	9.63593	9.46688	9.11031	9.33458	9.48687	9.58607	10.3514	9.99523	9.26032	10.6692	8.97958	9.03563	10.0876	9.61017	9.34063	9.39646	9.14835	9.84445	9.86006	9.08954	9.54353	9.32955	9.27195	9.62129	8.9933	9.78229	10.4394	9.16744	9.23799	8.79497	8.97672	9.17817	9.82347	9.54841	9.66489	9.58776	9.714	8.95218	9.74062	9.04885	9.54619	9.6011	9.38516	9.20519	9.77629	9.61277	10.0239	9.70785	9.41919
INVADER1_I	8.05323	8.07903	7.90942	7.76587	7.73396	7.76048	7.76879	7.2537	8.33601	7.34311	7.93835	7.96887	7.77543	7.91093	7.95675	7.81318	7.99159	7.70997	7.72156	7.93268	7.71807	7.75103	8.09003	7.81798	7.88832	7.89388	7.80641	8.18273	7.96337	7.91034	7.99247	7.86852	7.96257	7.28976	7.95064	7.92957	7.88844	8.01354	7.8419	8.11466	7.92116	8.06781	8.15081	8.05573	7.74325	7.6819	7.85167	7.92417	7.67176
INVADER1_LTR	6.76104	6.93302	6.89328	6.64432	6.55677	6.59878	6.75894	6.6773	6.9481	6.10134	6.99061	6.99409	6.73238	6.45759	6.49617	7.07614	7.11757	6.58135	6.21574	7.06907	6.58687	6.23521	6.84916	6.56039	7.23259	6.37349	6.78242	7.07226	7.05781	6.98414	6.74884	6.93698	6.86285	6.35795	6.69737	6.79325	6.68068	6.75788	6.49232	7.11859	6.72699	6.85679	6.88291	6.96604	6.13713	6.22745	6.4437	6.53206	6.66098
INVADER2_I	8.93217	8.1998	8.21351	8.60247	8.49669	8.21394	8.99905	9.00291	7.95613	8.95144	8.02458	7.98453	8.10848	8.95539	8.09191	8.62758	8.0053	8.99626	8.94579	7.84584	8.66126	8.39646	8.25126	8.57229	7.94441	9.07095	9.03891	7.82215	8.11708	8.01886	8.34001	8.11074	8.32039	8.74849	8.86456	8.70544	9.04674	7.93919	9.13362	7.99857	8.9598	8.8861	8.22517	8.03437	9.16467	8.83934	8.72229	8.83633	8.61485
INVADER2_LTR	5.78431	5.93122	5.98088	5.64668	5.72153	5.92055	5.5321	5.37352	5.78798	5.86182	5.96461	5.86727	5.88774	5.67313	5.82076	5.61473	6.02265	5.87889	5.71592	5.90185	5.69296	5.75892	6.00729	5.63575	5.79198	5.99945	5.85057	5.57732	5.73517	5.85587	5.86404	5.86469	6.03927	5.79951	5.72082	5.59845	5.87827	5.79807	5.75255	5.76721	5.97111	5.66659	5.79546	5.82173	5.53675	5.49707	5.87461	5.82655	5.69596
INVADER3_I	7.50215	7.49064	7.42738	7.54629	7.6581	7.35541	7.48564	7.85373	7.29614	7.00555	7.30737	7.63177	6.62721	7.43618	7.56354	7.41499	7.54717	7.57662	7.94355	7.26052	7.67035	7.32746	7.32146	7.53595	7.44277	7.92659	7.41953	7.2775	7.52158	7.2601	7.31615	7.56227	7.54592	7.36618	7.56635	7.54707	7.45189	7.35469	7.50985	7.23049	7.71419	7.45286	7.75093	7.18103	7.51165	7.31292	7.28702	7.33951	7.9354
INVADER3_LTR	4.55386	4.76512	4.53855	4.60461	4.79961	4.6549	4.64928	4.65441	4.5576	4.41757	4.70782	4.57751	4.16373	4.6274	4.7118	4.6116	4.67924	4.82885	4.87538	4.46623	4.83187	4.74223	4.56602	4.71647	4.48176	5.06561	4.5229	4.49855	4.46479	4.33176	4.41339	4.45169	4.63673	4.67651	4.68578	4.66754	4.67694	4.51765	4.64836	4.49074	4.83431	4.67712	4.793	4.4532	4.51357	4.63752	4.54668	4.69502	5.00089
INVADER4_I	7.29441	7.62836	7.56415	7.20075	7.26629	7.69066	7.05479	6.63155	7.39881	7.18124	7.56983	7.48025	7.64083	7.21575	7.63182	7.26957	7.58215	7.47779	7.20653	7.62965	6.96195	7.43773	7.57439	7.36534	7.78384	7.46773	7.39863	7.50872	7.77216	7.74737	7.47234	7.85175	7.28142	7.2557	7.29806	7.13114	7.11204	7.21544	7.11266	7.42625	7.52098	7.52301	7.36121	7.35093	7.11284	6.8302	7.24473	7.00038	7.33437
INVADER4_LTR	5.30797	5.62727	5.63426	5.3417	5.30807	5.71038	4.82815	5.06122	5.44906	5.28081	5.50215	5.77052	5.65726	5.09816	5.62461	5.28504	5.76051	5.46267	5.2209	5.79365	5.09622	5.56866	5.7037	5.31941	5.83921	5.39367	5.36485	5.36749	5.81481	5.9424	5.63553	5.81587	5.43077	5.42105	5.38678	5.23013	5.14396	5.575	5.0308	5.59347	5.63082	5.58565	5.61837	5.55059	4.8629	5.03774	5.30421	5.13935	5.53616
INVADER5_I	4.7284	5.02842	4.64172	4.67422	4.50294	4.65808	4.65159	4.40481	4.5942	4.61786	4.63882	4.50139	4.38287	4.41339	4.67095	4.60315	4.65625	4.64651	4.73046	4.66138	4.6847	4.66548	4.52824	4.74687	5.09504	4.61387	4.3979	4.49423	4.59216	4.69253	4.34503	4.80789	4.82467	4.74359	4.59094	4.55968	4.59424	4.53736	4.74568	4.94015	5.34546	5.11996	4.94425	5.02125	4.79571	4.73739	4.99567	4.63583	4.44906
INVADER5_LTR	2.94843	2.77014	2.7926	2.68988	3.01982	2.89935	2.57608	2.81309	2.8409	2.21373	2.77825	2.5585	2.35909	2.316	2.97615	2.89222	2.65835	3.01311	2.91277	2.8814	2.94961	2.63377	2.87732	2.85616	2.76055	2.75815	2.77898	2.49008	2.82107	2.64004	2.6659	2.74052	2.73495	2.84511	2.75016	2.63644	2.68014	2.71243	2.85237	2.99781	2.79021	2.7982	2.60445	2.80739	2.89244	3.0445	2.65243	2.6863	2.65918
INVADER6_I	5.54624	6.2282	5.84581	6.17009	5.90471	6.00551	5.56244	4.90971	6.33473	5.17765	6.18004	6.16031	5.66484	5.83734	5.97077	5.35715	6.4281	5.80575	6.01628	6.13272	6.03296	5.80706	6.41953	6.17292	6.10314	6.23665	6.16463	6.28348	5.80608	5.72512	6.11891	6.17092	5.65206	6.42152	6.1261	6.05346	6.14613	6.25378	5.55038	5.91362	6.69398	5.93736	6.2576	5.98425	5.75205	5.89246	5.74554	5.85675	6.04907
INVADER6_LTR	3.29862	3.84871	3.8813	3.53622	3.63109	3.63731	3.2924	2.94492	3.87213	2.89874	3.90514	3.87685	3.4464	3.62099	3.80708	3.37163	3.89923	3.2696	3.33622	3.93686	3.40129	3.56347	4.15952	3.5009	3.8996	3.82261	3.84216	3.98832	3.88208	3.76729	3.78275	4.04275	3.72658	3.90202	3.62555	3.78936	3.49286	3.93371	3.05504	3.76989	3.88963	3.66539	3.75006	3.81311	3.12917	3.21881	3.4303	3.35004	3.65241
IVK_DM	8.86406	8.76841	8.90214	8.84955	8.68617	9.1046	9.01251	8.6142	8.78369	8.67301	9.02469	8.95904	9.02994	8.94053	8.99425	8.56248	8.90738	8.72333	8.77456	8.90241	8.65479	9.05294	9.10685	8.98194	8.99317	8.86882	9.14592	8.8869	8.80474	8.48228	8.758	9.1376	9.02952	8.94036	8.72738	8.80057	8.79541	8.91726	8.74155	8.63292	8.95339	8.70439	9.21568	9.23758	8.8304	8.84553	8.79963	8.98834	8.73701
Jockey	9.4146	9.78151	9.9225	9.65421	9.25247	9.99392	9.5041	9.61116	9.5271	9.79875	9.68287	9.88458	9.92855	9.16315	9.70807	9.22746	10.1306	8.95335	8.4586	9.6688	9.59048	8.94738	9.75633	9.03842	10.0344	9.02327	9.56172	10.056	10.0798	9.93471	9.78885	9.2499	9.85036	9.35334	9.79907	9.51352	9.24236	9.80705	9.2257	9.99434	9.93399	9.3404	9.69593	9.53444	8.95688	9.64095	9.24405	9.06533	9.71735
JOCKEY2	6.6471	6.6366	6.60085	6.49262	6.51056	6.67189	6.29522	6.36882	6.53061	5.71719	6.60175	6.68116	6.57847	6.63283	6.47497	6.61602	6.49441	6.46717	6.4661	6.66299	6.56278	6.48791	6.44192	6.388	6.67332	6.62918	6.09294	6.45577	6.49222	6.55066	6.41515	6.4988	6.28566	6.41794	6.46365	6.52493	6.47788	6.45681	6.488	6.73328	5.89262	6.47969	6.60423	6.61413	6.53649	6.55544	6.41399	6.393	6.33297
LOOPER1_DM	4.59198	3.76355	3.6439	4.43032	4.09741	4.0787	4.00546	3.83695	3.88401	3.6072	3.76034	3.4925	3.054	4.33805	4.11788	4.55029	3.61518	4.42021	5.07814	3.70049	4.63754	4.3297	3.7059	4.71811	3.76045	4.66081	3.66098	3.4278	3.4289	3.52446	3.70426	3.87926	3.14788	4.70599	4.54342	4.35549	4.83388	3.82566	4.78656	3.62368	4.42389	4.54848	4.00364	3.85609	5.04544	4.94254	4.46024	4.75188	4.37679
LTRMDG3_DM	4.9847	4.60571	4.91319	5.14172	4.99492	5.06313	4.77096	4.22455	5.1568	5.16856	4.26228	5.07588	6.29101	4.97365	4.79017	4.52144	4.89428	5.37741	5.02156	4.10476	5.50001	7.6353	4.69096	5.10644	4.68784	5.28682	5.47576	4.55572	4.55512	4.22485	4.68389	5.81409	4.21138	5.06218	5.137	4.53818	4.9832	4.62838	4.93073	4.86566	5.24747	4.83696	5.08928	4.76425	4.80225	4.95768	5.16464	5.14408	5.3215
M4DM	7.87399	6.89682	6.76495	7.25984	7.58219	7.21597	7.43483	7.96895	6.80743	7.57992	6.68258	6.58011	7.23159	7.54342	6.91198	7.68156	6.79906	7.66632	7.69487	7.08596	7.75575	7.51468	7.26335	7.49183	6.81522	7.71721	7.18276	6.60816	6.33477	6.84627	6.86244	6.95158	6.6924	7.71579	7.46531	7.31317	7.8365	7.38165	7.76662	6.9195	7.40606	7.49243	7.21777	7.43294	7.91486	7.54928	7.51764	7.51846	7.28974
MARINER2_DM	6.44431	6.37259	6.70133	6.47586	6.34343	6.54001	6.08264	6.04072	6.26335	5.77224	6.54177	6.52735	6.2835	6.27467	6.37142	6.30469	6.489	5.98639	6.25196	6.60643	6.29622	6.33771	6.36565	6.31776	6.58457	6.31168	6.18369	6.56859	6.38313	6.49602	6.13264	6.58769	6.08445	6.24424	6.23627	6.28756	6.15994	6.42118	6.34979	6.29382	5.77293	6.20085	6.52319	6.56143	6.39827	6.36116	6.3443	6.32593	6.16113
MAX_I	9.49378	10.1558	10.1805	9.89498	9.96705	9.76689	10.1585	9.87154	9.85807	10.9464	10.2805	11.2435	10.6282	9.30858	9.72258	9.60303	10.5804	9.46603	9.14577	10.4279	9.3194	10.8847	10.2666	9.231	10.3858	9.13841	10.6	10.4061	10.2833	9.96128	9.99904	10.0135	10.2762	9.44291	9.62789	9.8848	9.19637	9.82841	9.49159	10.3116	9.71248	9.77504	10.5224	10.0679	9.22474	9.4879	9.55786	9.29579	9.79538
MAX_LTR	4.77852	5.41614	5.65119	5.44323	5.49189	5.17962	5.58374	4.97902	5.59922	6.57855	5.75352	6.82773	6.34113	5.35994	5.09469	5.09249	6.09139	5.1675	4.46519	5.89532	4.76638	6.41886	5.63538	4.45223	5.69021	4.59124	6.3244	5.6913	5.55613	5.53534	5.46047	5.26422	5.78638	5.05679	5.07893	5.44269	4.65195	5.42544	4.83376	5.86482	5.22494	5.33331	6.13519	5.59609	4.27601	4.99093	5.25228	4.96795	5.3643
MDG1_I	9.33173	8.22804	8.60465	9.32728	8.82613	8.65544	9.14799	9.19507	8.43083	9.13298	8.2284	8.53963	8.36307	9.54367	8.45224	9.41272	8.17951	9.56073	9.80583	8.54725	9.30698	8.97796	8.63535	9.30981	8.50709	9.42951	9.02244	8.74016	8.26078	8.16322	9.07317	8.57201	8.62588	9.42035	9.56459	9.20428	9.75785	8.7753	9.60717	8.29335	9.59492	9.23841	8.89413	8.40438	10.0359	9.827	9.29254	9.38527	9.53107
MDG1_LTR	6.19692	5.24286	5.76837	6.09725	5.64201	5.92254	5.70639	6.06483	5.66263	5.98706	5.68908	5.7935	5.55204	6.52188	5.54296	6.34262	5.53858	6.28004	6.32817	5.84586	6.27225	5.88191	5.92881	6.05354	5.79866	6.09454	5.91159	5.84783	5.41738	5.58229	5.85926	5.75428	5.6993	6.32799	6.29858	6.0921	6.46842	5.9819	6.24729	5.41382	6.16828	5.71912	5.9698	5.65326	6.36886	6.39899	6.09262	6.12595	6.29044
MDG3_DM	7.85137	7.56173	7.68163	8.15081	7.9171	7.75788	7.699	7.08675	7.92213	7.90978	7.25825	8.03977	8.91162	8.31721	7.83293	7.51168	7.7596	8.71142	8.33318	7.04061	8.43681	10.6274	7.63813	8.23776	7.53605	8.62848	8.34215	7.58036	7.64056	6.92579	7.66796	8.77253	7.43423	8.06843	8.42323	7.50211	8.14648	7.20992	8.05493	7.73305	8.71223	8.13502	7.93859	7.55361	8.21785	8.16934	8.08108	8.24645	8.44048
MICROPIA_I	8.30698	8.53687	8.29018	7.97204	8.69436	8.3873	8.16898	8.13637	8.15285	8.60236	8.61698	8.42936	8.3763	8.09182	8.91635	8.2612	8.4515	8.39581	8.25237	8.58252	8.38865	8.67304	8.46365	8.21138	8.4376	8.7132	8.46973	8.68986	8.27873	8.80881	8.2906	8.63995	8.39124	8.27992	8.23374	8.08544	8.18676	7.97937	8.07432	7.79499	8.69916	8.08494	8.70515	7.96129	8.41088	8.23703	8.34185	8.08479	8.54232
MICROPIA_LTR	5.72904	6.05253	5.80288	5.56886	6.25819	5.80679	6.00449	5.92493	5.69803	6.73638	6.14701	6.17369	6.05147	5.63895	6.40003	6.04335	6.23602	5.84534	5.52928	6.14693	6.02607	6.06113	6.1794	5.75462	6.06484	6.21044	6.72943	6.1809	5.80169	6.21861	5.9506	6.24721	6.00977	5.98911	5.80571	5.87214	5.72317	5.55193	5.5717	5.38233	6.22614	5.52765	6.31859	5.67262	5.47775	5.64	5.83079	5.6857	6.19824
NOMAD_I	8.97161	9.54687	9.76943	8.99995	9.59441	9.32823	9.51997	9.91364	9.63089	9.6643	9.3493	10.0819	9.45366	9.70879	9.64646	9.38164	9.9412	9.36349	9.22415	9.79187	9.16544	9.45593	9.79269	9.21606	9.94653	8.92341	9.54369	10.074	10.0277	9.76666	9.97324	9.36315	9.71169	9.23898	9.66912	9.56111	9.62346	9.81354	9.34625	10.0463	9.78767	9.08215	9.57245	9.4835	9.06447	9.04173	9.47751	9.75878	9.90956
NOMAD_LTR	6.06684	6.70375	7.2494	6.31219	6.76428	6.54303	7.12888	7.2764	6.68756	7.33623	7.02458	7.648	6.50361	6.96393	6.92246	6.73124	7.52143	6.40365	6.10684	7.27245	6.15456	6.38754	7.33349	6.05722	7.41838	5.574	7.07559	7.30029	7.41391	7.38205	7.37918	6.81851	7.07795	6.3489	6.63067	6.9287	6.51822	6.91077	6.27515	7.12404	6.76262	5.8989	7.11239	6.64223	5.6466	5.95791	6.50406	6.73998	7.10422
PLACW_DM	2.03796	1.1595	1.11346	1.49552	1.05072	1.15564	2.26268	2.78522	0.801995	2.76037	1.23728	1.29581	1.36814	2.43293	1.2176	1.62668	0.726813	1.91377	2.12801	1.13732	1.59108	1.65797	0.615031	1.59499	0.627419	2.0348	1.83626	1.09274	0.954063	1.2619	1.23819	1.39632	1.19105	1.93102	1.82976	1.47723	1.95671	1.58211	1.70873	1.02772	1.24884	1.56667	1.47403	1.47404	2.23214	2.10575	1.80461	1.81364	1.57647
POGO	6.75001	6.51256	6.44934	6.82987	6.47406	6.37418	6.44368	6.70453	6.9276	6.19654	6.46893	6.23272	6.17026	6.80999	6.69782	6.52167	5.91861	7.26646	7.3076	5.83421	7.19629	6.62901	6.56714	6.96657	5.87021	6.9946	6.82141	6.61116	6.16005	5.71287	6.85257	6.13299	6.39794	6.2901	6.74899	6.76961	6.76881	6.72173	6.80132	6.51111	6.9631	6.85848	6.27018	6.52771	7.07792	6.87168	6.67051	6.87142	6.21156
POGON1	2.86055	1.9236	0.690478	2.67581	2.30329	1.08167	3.02347	3.85717	1.69778	2.79859	1.23728	0.78149	1.78958	3.23679	2.20716	2.04991	-0.186686	3.27611	5.9715	1.37042	2.92907	2.28957	0.784851	1.9452	1.4113	3.38968	1.20732	1.97313	2.2082	1.22292	1.32716	0.733674	1.75969	3.00385	2.80199	2.4368	2.67812	1.75367	2.90282	0.880959	1.0581	2.57741	1.86385	1.72961	3.57884	3.31599	2.11864	2.92203	2.31364
PROTOP,PROTOP_A,PROTOP_B	10.8785	10.1555	10.2646	10.4799	10.5711	10.3725	10.5676	10.426	10.2714	10.7548	10.187	10.0099	10.774	10.8473	10.2994	10.6501	10.0711	10.6038	10.8547	10.0974	10.5887	10.4966	10.1177	10.5044	10.1307	10.9932	10.5955	10.0683	10.121	10.2376	10.1589	10.1725	10.2098	10.6923	10.5587	10.5061	10.7562	10.3451	10.6405	10.2572	10.2378	10.4907	10.3158	10.4369	11.0738	10.7955	10.632	10.733	10.4195
QUASIMODO2-I_DM	7.75388	7.04686	6.89993	7.51185	7.61912	7.10425	7.95526	7.25433	7.42058	8.11275	6.93166	7.33869	6.77565	7.90241	6.93766	8.01674	7.14501	7.87396	7.8121	6.78407	7.95162	7.38514	6.71371	7.58479	6.83324	7.95318	7.69255	6.73043	7.3081	6.76551	6.87487	6.87365	7.05668	7.53073	7.67208	7.35152	7.77961	7.13073	7.73299	7.07529	8.01841	7.63917	7.34898	7.43955	7.93107	7.61043	7.82849	7.80868	7.56803
QUASIMODO2-LTR_DM	5.54052	4.65383	4.76742	5.35147	5.17659	4.80466	5.14783	4.63111	5.09481	5.37075	4.82383	5.01929	4.3915	5.58942	4.54601	5.65922	5.09854	5.44592	5.59862	4.91853	5.60272	4.93767	4.69096	5.19378	4.70454	5.71347	5.28852	4.4702	4.75348	4.51636	4.59966	4.81501	4.62566	5.43652	5.31165	5.08473	5.45936	4.80462	5.30137	4.74707	5.45323	5.1803	5.0709	5.00479	5.27186	5.22622	5.44465	5.54933	5.2746
QUASIMODO_I	9.43121	8.09332	7.99669	9.18992	8.68302	8.42061	8.77044	8.89364	8.22031	8.64886	8.04954	8.12032	7.73724	9.206	7.81398	9.0808	8.09316	9.50942	10.0169	7.90207	9.28532	8.7178	8.26245	9.46519	8.18236	9.85841	8.53486	7.88215	7.94738	8.0647	8.58816	8.39844	8.34693	9.3566	9.43313	9.14985	9.58305	8.40302	9.41257	8.13183	9.42378	9.03109	8.34897	7.95405	9.88183	9.86314	9.1272	9.31832	9.27178
QUASIMODO_LTR	7.85652	7.62836	7.56024	7.65654	7.52711	7.79017	7.64331	7.43197	7.73421	7.7237	7.82002	7.91728	7.60744	7.35622	7.38943	7.58055	7.96572	7.55324	7.90922	7.65251	7.66171	7.57258	7.67911	7.78068	7.82262	8.02986	7.84978	7.63934	7.60601	7.85844	7.70697	7.85132	7.77839	7.60601	7.63195	7.56499	7.52068	7.99103	7.56861	7.74614	7.88518	7.3289	7.76274	7.62928	7.58122	7.82614	7.5884	7.57777	7.7385
R1-2_DM	5.26003	5.82314	6.62409	5.88092	5.82352	6.26197	5.98816	6.21603	5.78038	5.69836	6.52868	6.58328	5.98783	5.23921	5.92479	5.57963	6.65186	5.28248	4.84606	6.56353	5.25675	5.75985	6.4621	5.39163	6.58263	4.95364	5.7788	6.32182	6.56339	6.15403	5.89711	6.4866	6.24861	5.29309	5.29751	5.72477	4.99784	5.75664	5.3764	6.08826	5.31226	5.45087	6.30117	6.04619	5.03299	5.22747	5.38594	5.28987	5.70173
R1_DM	11.8912	12.8054	13.168	12.2519	13.0284	12.2272	13.1692	13.0976	12.497	14.4336	13.1879	13.4265	12.7908	11.6647	12.2539	11.9993	12.9269	11.7723	10.9715	13.4947	12.127	12.2554	13.1664	11.4265	13.4362	11.1747	13.8777	13.6893	13.4635	13.1552	12.6528	13.3359	13.1647	11.4926	12.1605	12.416	11.7983	12.2443	11.6376	12.0137	12.4862	11.4485	13.3992	11.9365	11.1799	11.5072	11.9017	11.5109	12.3295
R2_DM	8.17184	8.92921	9.77312	9.18608	9.54654	9.21299	8.1808	8.56484	9.50248	9.51702	9.38986	9.66417	9.10426	8.79368	9.05812	8.45801	9.48213	8.38059	8.43959	9.70279	9.0116	8.8737	8.92277	9.07213	9.13362	8.57009	8.90464	9.62975	9.67736	9.56642	9.56572	8.9554	9.22586	8.53914	9.10916	9.15518	8.85485	9.43016	8.7322	8.86836	9.82573	8.29177	9.71792	9.50143	8.62778	8.02128	9.08043	8.52022	9.36599
ROOA_I	8.60084	8.6686	8.65616	8.54517	8.44134	8.74979	8.04671	7.63716	8.79757	7.98653	8.63603	8.37326	8.42129	7.55331	8.74377	8.39447	8.51025	8.70203	8.60342	8.50115	8.40389	8.62533	8.51858	8.6673	8.52366	8.70153	8.17387	8.50751	8.56026	8.74909	8.45596	8.55365	8.17513	8.52947	8.5203	8.32503	8.57101	8.63246	8.44536	8.64315	8.77927	8.61801	8.57336	8.73226	8.58673	8.51391	8.36459	8.47009	8.42502
ROOA_LTR	6.04707	5.77721	5.72703	5.75171	5.91547	5.7778	5.34526	5.24895	5.85406	5.14466	5.72969	5.6254	5.60584	5.43565	5.88328	5.84041	5.68017	5.84716	5.77701	5.63472	5.67897	5.89205	5.63093	5.70155	5.51864	5.73492	5.17759	5.68182	5.62528	5.89126	5.55691	5.60217	5.47091	5.60896	5.70358	5.7316	5.76038	5.84785	5.7798	5.93393	5.47589	5.92063	5.8189	6.09066	5.88498	5.80727	5.74706	5.74914	5.55285
ROO_I	11.2115	10.4519	10.0878	11.0026	10.4561	10.7335	10.8066	10.4905	10.3368	10.8971	10.3136	9.96805	10.3214	11.1443	10.7388	11.2535	9.95663	11.2457	11.4869	10.2094	10.992	11.067	10.4459	11.171	10.2739	11.3028	10.6802	10.3511	10.1418	10.0643	10.621	10.4651	10.2534	11.4466	11.3397	11.1849	11.5292	10.4401	11.4901	10.2356	11.3389	11.1176	10.6059	10.5643	11.8063	11.5499	11.1949	11.0601	10.9328
ROO_LTR	8.3479	8.29434	8.13799	8.19366	7.90946	8.43077	7.68105	7.69893	8.07639	8.1916	8.43424	8.27806	8.28399	7.9485	8.3247	8.32986	8.23309	8.05741	7.96723	8.41263	7.96384	8.30959	8.34914	7.96345	8.19276	8.27286	7.97365	8.46849	8.29161	8.27937	8.35426	8.41493	8.09169	8.37798	8.29972	8.46267	8.28433	8.32976	8.22178	8.23254	8.37643	8.09099	8.37875	8.40764	8.12356	8.20942	8.23843	7.94023	8.11299
ROVER_DM	8.21671	7.90494	7.68291	8.55928	8.24248	8.36518	9.3138	8.66503	7.88967	8.71233	7.89896	7.65354	7.96154	8.22025	7.4126	8.33776	7.80668	8.59442	9.34141	7.42952	8.48931	8.16705	7.59965	8.72298	7.73414	8.74766	8.82082	7.29222	7.58957	7.76211	7.67585	7.67386	7.37398	8.67563	8.64848	8.59488	8.76458	8.06605	8.68278	7.95318	8.75911	8.65685	7.90094	7.31441	8.94109	9.43991	8.54742	8.43326	8.4515
RSP	4.86101	3.07249	3.84864	5.48297	6.35625	4.81611	5.9721	4.28053	5.88452	4.1957	5.62901	5.45599	4.16373	7.10231	6.10595	5.85472	5.10704	7.32259	6.44279	3.37538	6.81053	4.44441	3.4722	5.28133	4.54408	6.54558	6.37128	5.27973	4.532	2.91531	2.58574	4.67146	5.92289	6.18718	6.47929	6.57467	4.99176	4.57979	4.96222	4.91993	5.38083	4.57504	4.11944	4.71995	6.42048	6.57651	6.40855	4.56884	5.15881
S2_DM	6.10533	5.14898	5.35172	5.69423	5.38276	5.41618	5.18969	5.6678	5.26064	5.13536	5.24953	5.16739	5.05591	5.91505	5.4855	5.83591	5.1239	5.78915	6.14586	5.34136	5.75556	5.65556	5.19759	5.82781	5.18452	6.25251	4.93212	5.11624	5.17168	5.24197	5.17394	5.29126	5.06165	5.92232	5.73209	5.63703	5.88748	5.08194	5.92781	5.26145	5.44629	5.74785	5.38705	5.4485	6.38989	6.07058	5.85921	5.91842	5.53474
SAR2_DM	7.37044	5.70715	5.82357	7.80244	7.03758	6.08279	7.36188	7.45731	5.58837	7.94587	5.35564	5.1994	6.5813	8.27352	6.29463	7.46975	5.3932	7.96495	8.17621	5.3441	8.35817	6.81017	5.80394	8.16629	6.0054	7.45368	6.52815	5.25053	5.46031	5.81959	5.76003	6.21597	5.69188	7.82621	7.91641	7.90142	8.21366	5.76418	8.28666	5.45979	6.54409	7.59418	6.14205	5.38143	9.08835	9.11875	7.49607	7.87418	7.05561
SAR_DM	9.97883	7.9881	8.69814	9.86697	10.3583	8.22659	9.94298	9.36836	8.63705	11.2951	8.7082	8.14412	9.67639	11.5513	9.07518	10.5905	8.47249	10.1605	10.3909	8.18986	10.995	9.62476	8.93838	10.2178	8.52181	10.3788	9.63363	7.97336	8.18585	7.92711	8.86322	8.87609	8.97145	10.6781	10.0955	10.4666	10.3525	8.02475	10.7135	7.9784	9.66197	9.9858	8.94771	7.7995	11.2752	10.2132	10.9082	10.737	10.1192
S_DM	8.49482	7.92704	8.13423	8.19988	8.03188	7.86357	8.48621	8.56522	7.97402	8.05571	7.79154	7.99507	7.81535	9.02506	8.11814	8.38056	7.87029	8.03085	8.76646	7.83906	8.47515	8.14408	7.76663	8.31539	7.973	8.62169	8.08477	7.96028	7.88323	7.79092	7.76613	8.08172	7.7676	8.37068	8.33997	8.39485	8.42317	7.9994	8.41003	7.88179	7.69206	7.97781	8.06417	8.09169	8.81281	8.66985	8.25046	8.42655	7.98677
STALKER2_I	8.2399	7.76892	7.06779	7.88534	7.27146	7.36592	7.95841	7.29505	7.01144	7.88834	8.14442	6.82818	6.91715	7.83621	7.54068	7.82776	7.71602	7.89703	8.40808	6.98853	7.90231	8.02816	7.25687	7.94108	7.50948	7.43792	7.43064	6.89902	6.71477	7.13282	7.62364	7.51581	7.21686	8.39605	7.40388	7.56128	7.84411	6.59111	8.17983	6.24151	8.27825	7.96631	7.5198	6.76647	8.38581	7.76965	7.74234	8.78385	7.97487
STALKER2_LTR	5.30031	5.74384	4.53628	5.41343	4.50514	5.27501	5.36928	4.9432	4.96444	5.47913	6.18004	4.33092	4.57402	5.14221	5.40531	4.76623	5.3663	4.78233	5.85121	4.64591	5.18182	5.91544	4.86207	5.45746	5.22644	4.72198	4.6801	4.46358	4.489	4.78742	5.14887	5.24723	4.98401	5.55261	4.76783	4.87236	4.82888	4.49364	5.29734	4.01249	5.57402	5.1821	4.94425	4.60034	5.4468	4.89929	5.06158	6.11214	5.38395
STALKER3_LTR	4.55462	5.05786	4.85956	4.35813	5.23857	5.01674	4.48052	4.71661	4.758	4.82644	4.51684	4.53887	5.01462	4.30452	4.79271	4.53926	4.57686	4.86242	4.54034	4.84298	4.6321	4.96355	4.91426	4.17956	4.76267	4.7869	4.69046	5.04557	4.8501	4.99397	4.72189	4.89441	4.84773	4.51289	4.52297	4.6784	4.50537	4.40631	4.49237	4.8493	4.61299	4.62354	4.8917	4.73998	4.83926	4.48497	4.75971	4.56002	4.51132
STALKER4_I	10.1708	9.20332	9.12592	9.89064	9.99278	9.07877	9.90901	9.98315	9.19361	9.98827	9.0206	8.8345	8.91845	10.4315	9.21627	10.2336	8.84128	10.1698	10.7088	8.97984	10.1464	9.71524	9.13707	10.2251	8.97423	10.37	9.72937	8.94015	8.91799	8.74393	9.38747	9.10893	9.15428	10.2482	10.1684	9.91974	10.2953	9.12983	10.3351	8.83219	10.1021	10.0178	9.44476	8.98528	10.6782	10.5775	10.1931	10.357	9.9078
STALKER4_LTR	7.6186	7.52722	7.31497	7.41996	7.65316	7.50682	7.0611	7.49866	7.51809	7.3289	7.4116	7.33368	7.46121	7.60112	7.31745	7.50334	7.39809	7.23728	7.7163	7.40805	7.45181	7.49319	7.36999	7.38282	7.26634	7.75428	7.18886	7.34482	7.31365	7.30541	7.32119	7.37004	7.4015	7.56017	7.46064	7.57124	7.44657	7.59651	7.41537	7.2248	7.17605	7.20039	7.50162	7.47031	7.5328	7.60001	7.62169	7.61836	7.40157
TABOR_I	8.07292	7.45058	8.36939	7.86495	7.87063	7.379	7.34166	7.53128	7.91549	7.93278	7.52439	6.3821	7.28912	8.1513	7.63312	7.70753	7.28054	8.26516	8.52903	6.97974	8.20004	7.76788	7.16984	8.3741	7.2056	7.95415	8.19235	7.52392	7.39801	6.75188	7.29563	7.82931	6.78836	8.5299	8.53676	7.6205	8.27464	7.79662	8.57352	7.36716	10.3585	8.32653	7.58816	7.41197	8.74775	8.20931	8.19457	8.41217	7.93912
TABOR_LTR	5.57115	6.00934	7.16016	5.57418	5.83315	5.67072	4.61542	5.07568	6.13707	5.67288	6.29892	5.16033	6.10096	5.64279	5.94282	5.094	6.11336	5.64648	5.01235	5.9139	5.30082	5.67135	5.96284	5.65191	5.89121	5.45762	5.63522	6.15647	6.23224	5.57167	5.78492	6.38627	5.00638	5.85246	5.93699	5.47725	5.48123	6.20717	5.64092	5.95472	7.88877	5.76164	5.96428	5.96605	5.37957	5.21114	5.63917	5.73236	5.57902
TAHRE	8.45711	8.04485	8.35218	8.8699	8.50741	8.61156	9.4204	9.54263	8.9713	9.10871	6.99823	9.42399	8.67131	8.44646	8.16963	7.26757	8.73797	8.69587	9.62936	8.64265	7.42061	8.35796	8.30199	8.96353	7.62743	9.46869	8.3667	7.98246	7.65959	8.80542	8.25935	8.32371	8.60306	8.19862	8.95183	9.1629	9.2207	8.52662	7.68051	9.824	7.94265	7.21568	7.97254	9.07851	8.91551	9.21929	9.02787	8.31985	8.05134
TART-A	7.99732	8.63248	8.6281	7.39365	7.96032	8.04252	9.1482	8.86344	7.55569	8.48827	8.57557	9.04581	8.40334	7.26037	8.17905	8.36128	7.90321	7.11833	8.33898	7.78381	7.15566	8.11749	8.39545	8.19635	7.79475	8.27475	9.48938	8.40438	7.83468	8.4209	8.27969	8.65254	7.59557	7.08718	7.49988	7.61205	7.18609	8.28105	8.01126	9.55083	7.85052	8.07456	8.04677	8.02733	7.58986	8.54477	7.4119	7.19477	8.1189
TART_B1	5.1833	6.87028	8.86893	6.60197	6.45943	6.50418	7.14391	7.33676	8.07743	7.4156	5.76026	8.13065	6.88544	5.23244	6.9244	5.06661	7.26384	6.03231	4.95582	7.30484	4.19051	5.65556	5.2464	6.54023	7.7042	6.84571	8.27422	7.20093	4.68463	5.87564	5.00989	6.39579	5.59417	7.2566	6.37043	6.31588	6.49676	5.42966	6.94295	4.53641	7.37113	6.0099	6.00034	7.10438	6.44991	6.35279	5.72457	7.79193	7.28848
TC1-2_DM	6.85453	5.73476	5.58333	6.56427	6.27436	5.94813	6.24227	6.31744	5.91146	5.91388	5.63513	5.4924	5.35884	6.75401	5.98157	6.65512	5.48086	6.70958	7.12097	5.57993	6.72203	6.37795	5.73098	6.76153	5.73852	6.80142	5.94728	5.48114	5.43787	5.53931	5.77366	5.82118	5.50877	6.77373	6.61626	6.47151	6.88408	5.87366	6.86965	5.72927	6.21557	6.6418	6.04914	5.89019	7.34848	7.09599	6.65977	6.80132	6.36705
TC1_DM	7.39981	7.28362	7.32457	7.30614	7.06758	7.37344	7.01033	6.79641	7.23465	6.96201	7.42544	7.41239	7.3347	7.15299	7.35775	7.2822	7.41616	7.22905	7.28264	7.36617	7.14424	7.35613	7.19379	7.27107	7.39725	7.42997	7.03283	7.31508	7.33991	7.3676	7.268	7.44132	6.95861	7.30602	7.2023	7.18647	7.28707	7.33258	7.28627	7.38628	7.14617	7.16022	7.37709	7.44941	7.46787	7.4023	7.2406	7.28409	7.15066
TIRANT_I	8.56789	8.13363	8.08717	8.24365	8.41708	8.32179	8.54895	8.19664	7.95487	8.08137	8.01827	7.6593	8.22813	8.51071	7.61828	7.85225	8.14208	8.6907	8.0451	8.25961	7.6501	8.08268	8.30304	7.59019	7.81384	8.35366	7.83314	7.99361	7.94201	8.14639	8.24596	8.39992	8.67585	7.92587	8.56247	8.79915	8.72876	8.52736	8.47668	7.8507	9.12089	8.47601	8.42791	8.32285	8.03867	8.43345	8.27071	8.13189	8.08956
TIRANT_LTR	5.37122	5.24286	5.52825	5.54544	5.48968	5.38577	5.8569	5.50324	4.97002	5.3532	5.43216	5.11872	5.5773	6.00379	4.45056	5.32154	5.66681	5.616	4.77937	5.7206	4.68645	5.0805	5.61412	4.27281	5.13256	5.16282	5.38198	5.47786	5.38608	5.4173	5.6657	5.69862	5.99951	4.87086	5.6045	5.97768	5.71088	5.73887	5.41953	5.30648	6.01257	5.68041	5.7332	5.27036	4.66467	5.21912	5.43272	5.15758	4.97274
TLD1	2.39997	0.969764	1.23077	2.09942	2.02613	0.94234	2.51152	2.34422	0.935777	1.69118	0.822446	0.414951	0.0250439	2.01008	1.26716	2.42067	1.01883	2.8216	2.65992	0.976932	2.70227	1.75006	1.44244	2.35639	0.779329	2.78332	1.50194	0.843511	-0.020127	0.459793	0.778988	1.41517	0.956696	2.34527	2.5974	2.01522	2.4463	0.439104	2.74321	0.597337	2.32921	2.31923	1.00856	0.790385	3.15748	2.87413	2.54453	2.48859	2.04849
TLD2	5.34957	2.84575	2.85971	4.99925	4.40059	3.32105	4.37281	4.42978	2.89353	2.92488	2.72415	2.28518	2.92626	5.31414	2.95211	4.93394	2.61131	5.09752	5.59774	2.30407	5.06898	4.36653	2.63224	4.97363	2.59635	5.41074	3.0279	2.52443	2.81412	2.57961	3.20457	2.86229	2.79943	4.97945	4.9418	5.06931	5.57914	2.64136	5.46341	2.86092	3.68791	5.18569	3.23039	3.12576	6.41676	5.75104	5.09941	5.0826	4.52257
Transib1	5.4547	4.30002	4.31769	5.05577	5.16554	4.62103	4.78258	4.58335	4.32654	4.60714	4.00683	3.72829	4.102	5.27593	4.87574	5.33245	3.97241	5.515	5.82213	3.89633	5.34524	5.08934	4.23475	5.33307	4.27042	5.48857	4.3333	3.82569	4.10635	4.3477	4.30335	4.32782	4.37106	5.31318	5.28263	5.08273	5.54825	4.52754	5.60146	4.42824	5.17629	5.54174	4.4165	4.59696	6.00492	5.71793	5.4459	5.49208	5.00649
TRANSIB2	7.58388	6.76346	6.68755	7.42764	7.10676	6.88564	7.19184	7.17096	6.7791	6.89139	6.6142	6.43917	6.32377	7.71321	6.97057	7.41106	6.39376	7.87163	8.01774	6.67828	7.62534	7.31652	6.7965	7.71319	6.79698	7.79245	7.00752	6.53424	6.31643	6.6198	6.72915	6.81008	6.56605	7.7315	7.56578	7.39154	7.80937	6.81026	7.749	6.61102	7.31643	7.56052	6.97419	6.95059	8.10137	7.95701	7.51764	7.9007	7.39482
TRANSIB3	6.43076	5.55214	5.66793	6.20162	6.09079	5.85684	6.07234	6.34395	5.73979	5.64954	5.57017	5.39479	5.3979	6.49806	5.8805	6.33403	5.4982	6.32444	6.67104	5.41233	6.36912	6.07529	5.51981	6.34907	5.6152	6.6368	5.83277	5.48442	5.49984	5.52637	5.51492	5.59082	5.52196	6.4449	6.31591	6.16106	6.43668	5.62743	6.45979	5.60326	6.16532	6.31273	5.72016	5.77248	6.8077	6.56503	6.32337	6.46468	6.12528
Transib4	5.53324	4.42442	4.42251	5.25822	5.06204	4.68955	5.01261	5.50002	4.48306	4.73334	4.43781	4.2455	4.44634	5.66749	4.62417	5.30731	4.33772	5.3437	5.84751	4.36724	5.50399	4.98424	4.40597	5.37852	4.49828	5.67766	4.86057	4.39098	3.95341	4.3724	4.58427	4.50105	4.29762	5.52898	5.34872	5.25626	5.51046	4.74654	5.46581	4.27011	4.80748	5.27005	4.85875	4.70279	5.8819	5.79159	5.32542	5.56969	5.03436
Transib5	6.47423	4.9956	5.28547	5.93864	5.88883	5.51697	6.22881	6.09636	5.25881	5.70592	4.97045	4.80624	5.05523	6.65676	5.32568	6.41921	4.99545	6.6979	6.55487	4.694	6.25908	6.05136	4.94505	6.00292	5.00735	6.49199	5.54871	4.85799	4.90675	4.99108	5.29782	4.94879	5.44343	6.36503	6.2006	5.9948	6.39011	5.09795	6.55055	5.29444	6.00928	6.38641	5.29152	5.28721	6.85758	6.49896	6.39825	6.29544	5.97862
Transib-N1_DM	4.21577	2.36163	2.3903	3.74608	2.72078	2.60809	3.04117	3.37713	2.53838	2.09592	2.22404	2.15495	2.16145	3.72604	2.5691	3.86411	2.35944	2.98423	3.8956	2.61689	4.00946	2.82235	2.30368	3.76879	2.55484	3.66087	2.29105	2.52443	2.45161	2.35469	1.88287	2.27742	1.89862	3.63376	3.46591	3.47328	3.54807	2.85118	4.03678	2.39502	2.11489	3.30461	2.59305	2.63383	4.19514	4.24448	3.57672	3.75426	3.12517
TRANSPAC_I	7.68588	7.2788	6.52594	7.83368	7.40699	6.64445	7.57523	7.65171	6.72566	7.63936	6.65514	6.29782	6.3547	8.34977	7.04598	8.11612	6.63334	8.12578	7.824	6.55053	8.47001	7.7589	6.69145	7.84728	6.79865	8.41051	7.43192	6.40713	6.38957	5.83098	7.08102	6.39044	7.04259	7.88712	8.09382	7.71579	8.02218	6.50364	8.2883	6.84474	8.00395	8.02752	6.77226	6.5965	9.01372	8.42653	7.96664	8.10137	7.73842
TRANSPAC_LTR	4.89249	6.08604	5.3556	5.21654	5.22399	5.39725	4.5315	4.92256	5.23769	5.10136	5.46963	5.31826	5.33668	5.08599	5.5006	5.50336	5.62005	5.45647	4.84754	5.59152	5.67853	5.71294	5.28514	5.13423	5.57293	5.75223	5.3222	5.53267	5.19995	4.61185	5.33813	4.93579	5.56896	5.09288	5.42475	5.04588	5.07505	5.20411	5.07757	5.71851	5.84276	5.3764	5.26303	5.58421	5.59201	5.2432	5.26225	5.30789	5.25717
XDMR	6.8596	4.31561	4.60525	6.60494	5.31559	4.47699	6.4658	7.10378	4.60141	6.58745	4.15731	4.29787	4.88319	7.00029	4.58366	6.60707	4.25086	6.46075	7.18004	4.28113	6.85477	5.82129	4.25224	6.29718	4.63404	6.73555	5.77394	4.06616	4.37553	4.12267	4.75662	4.82737	4.47094	6.84437	6.29972	6.26074	6.74116	4.29494	7.10576	3.78028	5.44001	6.65495	4.67898	3.7628	7.69468	7.32659	6.40212	6.66404	6.0389
ZAM_I	7.29735	6.98166	6.85084	7.0598	6.90594	7.06879	8.43574	7.678	6.91521	8.62364	6.87796	6.41448	7.32502	7.2164	7.80918	7.25448	6.79248	7.99034	7.22743	6.70627	7.90146	7.63354	6.8255	7.55993	6.85745	7.50434	7.43372	6.6221	7.04785	7.26581	6.71126	6.81275	7.00848	7.26769	7.66498	7.63798	7.18672	6.56254	7.63983	6.75363	7.26214	7.70908	7.45946	6.92424	8.21823	7.21636	7.5042	7.35029	7.28656
ZAM_LTR	4.09918	4.4749	4.65438	4.38087	3.90478	4.72034	5.41954	4.26548	3.85534	5.46435	4.33327	4.46521	4.72241	3.98785	4.36438	4.34267	4.44221	4.73032	3.43011	4.40975	4.67062	4.4467	4.51381	4.22424	4.56776	3.73758	4.31334	4.30221	5.00617	4.78408	3.86995	4.45625	4.2465	3.95276	4.39088	4.7995	3.80277	3.89451	4.12442	4.4844	3.89372	3.91009	5.02496	4.36469	4.02398	3.68686	4.19623	3.94379	4.29034
[truncated: 151 more columns]

## Sheet: Table S6C
RepBase Sequence ID	% Var Explained by DNA Copy #	DNA Copy # Effect P-value	DNA Copy # Effect FDR	% Var Explained by Sex Effect	Sex Effect P-value	Sex Effect FDR	% Var Explained by Wolbachia	Wolbachia Effect P-value	Wolbachia Effect FDR	% Var Explained by Sex × Wolbachia Interaction	Sex × Wolbachia Interaction P-value	Sex × Wolbachia FDR	H2	Line Effect P-value (Copy # Independent)	Line Effect FDR (Copy # Independent)	Sex × Line Interaction P-value	Sex × Line Interaction FDR
ACCORD2_I	0.0281077	1.85756e-06	4.71722e-06	0.0411047	4.10783e-15	6.77616e-15	0.0132761	0.0477821	0.663575	0.000361038	0.658471	0.927628	0.653356	1.87979e-32	5.10985e-32	0.0095755	0.0128338
ACCORD2_LTR	6.49487e-06	0.942626	0.962576	0.24286	0	0	0.00108262	0.345201	0.980769	0.00034205	0.753152	0.939187	0.130706	0.00245307	0.00270538	0.847206	0.883842
ACCORD_I	0.0249406	7.1884e-06	1.7342e-05	0.0302827	0	0	0.00261973	0.324075	0.97729	0.00556663	0.00842483	0.371414	0.941513	1.1895e-71	1.63982e-70	5.42715e-26	1.83761e-25
ACCORD_LTR	0.0392121	1.62202e-08	4.74319e-08	0.023631	6.66134e-16	1.13773e-15	-0.00125231	0.399526	0.980769	0.0130425	0.00106001	0.204582	0.815314	2.47864e-52	1.19594e-51	2.10411e-05	3.24875e-05
ARS406_DM	0.00589719	0.029867	0.0496924	0.116376	0	0	-0.00104794	0.955267	0.990395	0.00367045	0.287667	0.802469	0.160908	3.00035e-05	3.61917e-05	1	1
BAGGINS1	4.1241e-05	0.856087	0.897961	0.582461	0	0	-0.000108288	0.758224	0.980769	0.00151014	0.540446	0.89919	0.482571	1.41827e-05	1.73244e-05	5.84176e-09	1.06364e-08
BARI_DM	0.0422427	4.43938e-09	1.31816e-08	0.0848075	0	0	0.0128144	0.0650098	0.72266	0.00359983	0.0691039	0.73256	0.913756	1.98413e-58	1.19668e-57	3.93124e-23	1.22376e-22
BATUMI_I	2.95992e-05	0.877892	0.910931	0.653031	0	0	-0.00083639	0.641369	0.980769	0.00971017	0.0873715	0.769229	0.796523	1.45228e-15	2.37533e-15	5.1984e-34	2.28021e-33
BATUMI_LTR	3.42569e-07	0.986813	0.990061	0.160039	0	0	-0.000155484	0.782583	0.980769	0.00133455	0.491112	0.881266	0.65016	4.28622e-18	7.95424e-18	1.13554e-09	2.14861e-09
BEL_I	0.130823	3.91775e-26	2.60733e-25	0.0126432	4.24659e-10	5.93907e-10	0.00722188	0.207761	0.920732	0.000138952	0.698995	0.934983	0.957506	1.55894e-65	1.30815e-64	3.97513e-48	2.64552e-47
BEL_LTR	0.304254	7.01112e-65	1.69143e-63	0.00162673	0.0588738	0.0634784	0.000281763	0.778266	0.980769	0.000146498	0.751172	0.939187	0.831209	3.81833e-45	1.44498e-44	2.36889e-11	4.81258e-11
Bica_I	0.00550451	0.0358973	0.0577348	0.0668179	0	0	0.00599475	0.172238	0.920732	0.00226472	0.327246	0.82024	0.826395	2.38285e-27	5.89603e-27	3.90114e-26	1.3445e-25
Bica_LTR	0.00699245	0.0180008	0.0307447	0.00858316	0.00659092	0.00735288	0.00300598	0.205892	0.920732	0.000196895	0.815286	0.955686	0.230562	0.000442214	0.000499107	0.123511	0.148985
BLASTOPIA_I	0.16439	5.24319e-33	4.59971e-32	0.0238843	0	0	0.00218706	0.492544	0.980769	3.75401e-05	0.807097	0.955642	0.972361	9.67716e-82	2.33461e-80	2.65003e-50	1.82663e-49
BLASTOPIA_LTR	0.231651	1.27192e-47	1.70094e-46	0.0185387	3.9968e-15	6.64985e-15	0.000783786	0.679029	0.980769	1.11554e-06	0.970292	0.988808	0.947387	3.6087e-71	4.353e-70	5.7356e-31	2.26293e-30
BLOOD_I	0.0801973	3.21276e-16	1.31928e-15	0.0113798	2.07032e-10	2.95979e-10	0.000633745	0.706085	0.980769	8.12292e-05	0.748491	0.939187	0.955869	4.44417e-72	6.59788e-71	4.153e-38	1.9084e-37
BLOOD_LTR	0.204498	1.41042e-41	1.60124e-40	0.0272635	2.22045e-16	3.89587e-16	0.00302857	0.393486	0.980769	0.000438084	0.524881	0.881266	0.908458	2.28771e-58	1.33797e-57	6.3196e-21	1.848e-20
BS	0.0915758	2.09832e-18	8.99947e-18	0.000619037	0.0893554	0.094756	0.0265184	0.0168466	0.423612	0.000444808	0.474415	0.881266	0.9799	1.00686e-68	1.07958e-67	3.2858e-89	4.87815e-88
BS2	0.00516276	0.04218	0.0667273	0.124504	0	0	-0.000471841	0.920414	0.990395	0.00175294	0.423702	0.87872	0.538451	9.40324e-17	1.60604e-16	0.000464129	0.000678613
BS3_DM	0.00158438	0.260793	0.335554	0.448074	0	0	-0.000399278	0.553388	0.980769	0.00489399	0.268895	0.802469	0.493463	7.65231e-06	9.59023e-06	2.56572e-09	4.71604e-09
BS4_DM	1.94581e-07	0.990061	0.990061	0.213601	0	0	0.00157122	0.234127	0.961155	0.00062491	0.675928	0.934983	0.0774738	0.0125776	0.013486	1	1
BURDOCK_I	0.154363	6.30956e-31	5.07394e-30	0.0165978	3.59661e-10	5.06676e-10	0.00545542	0.26474	0.961155	0.000183529	0.695771	0.934983	0.93951	6.02456e-55	3.14254e-54	3.97447e-43	2.2561e-42
BURDOCK_LTR	0.109635	6.37173e-22	3.41596e-21	0.0385684	0	0	0.00257047	0.416532	0.980769	0.000360639	0.62261	0.919716	0.863981	5.25757e-45	1.95137e-44	2.82476e-18	7.26904e-18
Chimpo_I	0.0113506	0.00255071	0.0049726	0.00877144	0.000267116	0.00031435	1.8766e-05	0.624689	0.980769	0.00238123	0.289971	0.802469	0.583815	5.48689e-26	1.27587e-25	0.025305	0.0323435
Chimpo_LTR	0.00340082	0.0992981	0.146149	0.341438	0	0	-0.000463355	0.274224	0.961155	0.00781849	0.198526	0.802469	0.225052	1	1	0.000107656	0.000161067
Chouto_I	0.234787	2.47117e-48	3.66874e-47	0.000172908	0.570369	0.579374	0.00625174	0.207022	0.920732	0.000243907	0.748499	0.939187	0.879811	3.63045e-28	9.09971e-28	6.74841e-43	3.72126e-42
Chouto_LTR	0.00548521	0.0362247	0.0577799	0.036573	1.5991e-10	2.3205e-10	0.00444821	0.199108	0.920732	0.000219005	0.770791	0.941536	0.458256	6.21097e-17	1.07028e-16	0.0969012	0.118367
CIRCE	0.00837484	0.00960317	0.017485	0.0602289	5.66214e-15	9.18313e-15	0.00760619	0.116615	0.776095	0.00178435	0.424067	0.87872	0.75559	2.43453e-20	4.84397e-20	9.57397e-20	2.67794e-19
Copia1-I_DM	0.00634575	0.0242472	0.0406932	0.703152	0	0	-9.90618e-06	0.962082	0.990395	0.00013108	0.794534	0.955642	0.847032	7.08685e-35	2.04143e-34	2.50897e-23	7.93822e-23
Copia1-LTR_DM	0.00111716	0.34509	0.413679	0.255323	0	0	0.00615823	0.0751995	0.72266	0.00191127	0.45891	0.881266	0.561029	2.86433e-10	4.00591e-10	2.24271e-09	4.20235e-09
COPIA2I_DM	0.00244937	0.161967	0.221699	0.727827	0	0	-0.000117907	0.979347	0.990395	0.00134096	0.600557	0.919716	0.74261	6.01414e-05	7.07761e-05	4.48898e-41	2.22147e-40
COPIA2LTR_DM	0.0707589	2.00578e-14	7.74229e-14	0.00314987	0.0624211	0.0669293	0.000799428	0.581465	0.980769	6.52649e-08	0.996133	0.996133	0.402732	1.48242e-13	2.27069e-13	0.142057	0.16924
COPIA_DM_I	0.0431393	3.02484e-09	9.26659e-09	0.00307471	5.76835e-07	7.18253e-07	0.000570485	0.667669	0.980769	0.000983274	0.112061	0.778108	0.961211	9.7855e-102	6.29534e-100	2.24197e-15	5.27684e-15
COPIA_DM_LTR	0.00896385	0.00736835	0.013674	-0.00215044	0.134898	0.141496	-0.00305466	0.739011	0.980769	0.0103148	0.0342926	0.509113	0.403379	9.24127e-21	1.85788e-20	0.999999	1
DIVER2_I	0.00396501	0.0750769	0.114093	0.0673164	0	0	0.000129841	0.65193	0.980769	0.000975397	0.560281	0.905434	0.258746	2.46444e-10	3.4718e-10	1	1
DIVER2_LTR	0.018686	0.000105082	0.000227875	0.0575985	1.33227e-15	2.25551e-15	-0.000309559	0.90617	0.990395	0.00113754	0.499928	0.881266	0.47854	2.35305e-18	4.45234e-18	0.0868209	0.107413
DIVER_I	0.113522	1.09326e-22	6.02854e-22	0.0166611	3.0132e-09	4.12445e-09	0.00879521	0.159579	0.905845	2.80331e-05	0.88606	0.977198	0.970117	1.66132e-50	6.97032e-50	5.69966e-93	1.00003e-91
DIVER_LTR	0.104068	7.85919e-21	3.99164e-20	0.00677232	0.000316685	0.000370426	0.000562417	0.636831	0.980769	0.00116836	0.397743	0.87872	0.886698	5.94395e-42	2.04854e-41	1.71671e-28	6.13565e-28
DM1731_I	0.00108116	0.352986	0.420273	0.48087	0	0	0.000133678	0.441805	0.980769	0.00580804	0.22962	0.802469	0.953051	1.87601e-12	2.76389e-12	1.22149e-138	7.85824e-137
DM1731_LTR	0.00687338	0.0190116	0.0321863	0.808793	0	0	0.000286464	0.321412	0.97729	0.00365509	0.421193	0.87872	0.807291	0.00519098	0.00569238	8.91777e-65	8.19586e-64
DM176	0.0206612	4.49513e-05	0.000103281	0.0181202	1.33815e-11	2.00204e-11	0.00459182	0.278884	0.961155	0.00127919	0.292015	0.802469	0.868322	3.99622e-55	2.14242e-54	1.17353e-11	2.40948e-11
DM297_I	0.010622	0.00351964	0.00672565	0.0218351	0	0	0.00461716	0.306313	0.97729	0.000730013	0.257885	0.802469	0.949223	1.92516e-85	5.30795e-84	4.84654e-19	1.31744e-18
DM297_LTR	0.0990879	7.34974e-20	3.45975e-19	0.00918845	5.03883e-05	6.04034e-05	0.00274965	0.404341	0.980769	0.000219965	0.716926	0.939187	0.834675	5.72687e-40	1.81195e-39	8.43398e-16	2.0347e-15
DM412B_LTR,DM412_LTR	0.158032	1.10037e-31	9.23354e-31	0.0613894	0	0	0.00968481	0.111442	0.768156	3.07367e-05	0.898119	0.983813	0.858124	3.27759e-36	9.58447e-36	4.92112e-25	1.60979e-24
DM412_I	0.0508477	1.10939e-10	3.69158e-10	0.0367493	5.55112e-16	9.56576e-16	0.00149823	0.547918	0.980769	6.28174e-05	0.838818	0.95794	0.920342	2.1155e-45	8.16582e-45	3.82693e-41	1.94368e-40
DMCR1A	0.000847736	0.410844	0.474808	0.146472	0	0	0.00197433	0.330134	0.980244	0.000656089	0.623668	0.919716	0.405804	3.49079e-14	5.47742e-14	0.177102	0.208419
DMHMR1	0.00020501	0.685943	0.739592	0.770004	0	0	-5.37453e-05	0.923819	0.990395	0.000800342	0.667572	0.933634	0.680391	1.02055e-06	1.33991e-06	3.88978e-26	1.3445e-25
DMHMR2	0.141414	2.83163e-28	2.10194e-27	0.0634511	4.1307e-12	6.22831e-12	-0.00161024	0.871823	0.990395	0.00547513	0.242003	0.802469	0.422876	7.36914e-05	8.56773e-05	1.30519e-06	2.153e-06
DMLTR5	0.0924121	1.44664e-18	6.34547e-18	0.101414	0	0	0.0387247	0.000842791	0.162659	0.00442437	0.0991677	0.769229	0.817819	9.38209e-41	3.0179e-40	3.52139e-12	7.38727e-12
DMRP1	0.002028	0.203235	0.270513	0.00476501	0.022412	0.0244379	0.00298762	0.137708	0.885919	0.00475298	0.253001	0.802469	0.286748	9.55472e-05	0.000110423	0.0245012	0.0315249
DMRT1A	0.011081	0.00287299	0.00554486	0.392254	0	0	-0.000649071	0.686399	0.980769	0.00493051	0.190014	0.802469	0.666308	8.96762e-18	1.63278e-17	2.63567e-11	5.2988e-11
DMRT1B	0.00450874	0.0576458	0.089723	0.00423675	8.01371e-07	9.9144e-07	0.000111366	0.862773	0.990395	8.49507e-05	0.681965	0.934983	0.908817	1.9e-89	7.33399e-88	0.00356799	0.00484945
DMRT1C	0.000464356	0.542781	0.59861	0.753186	0	0	-6.58974e-05	0.437191	0.980769	0.00421789	0.31184	0.802469	0.256264	0.0287924	0.0305326	0.00314927	0.00437273
DMSAT6	9.74819e-05	0.780376	0.827702	0.310127	0	0	0.00132629	0.26779	0.961155	0.000133751	0.8496	0.958906	0.113135	0.0477698	0.0503802	0.532166	0.580664
DMTOM1_LTR	0.00150522	0.273058	0.346712	0.808581	0	0	-0.000205892	0.778972	0.980769	0.00380712	0.291004	0.802469	0.249278	1.98794e-05	2.41304e-05	0.195292	0.227056
DNAREP1_DM	0.000814786	0.420092	0.482606	0.142239	0	0	-0.000466967	0.554059	0.980769	0.00436176	0.218668	0.802469	0.359484	1.27566e-11	1.85114e-11	0.230351	0.266214
DOC	0.02722	2.71392e-06	6.80243e-06	0.055343	0	0	-0.000441313	0.956424	0.990395	0.00148048	0.189342	0.802469	0.860773	9.82767e-67	9.4837e-66	0.000147843	0.000217814
DOC2_DM	0.0019326	0.21421	0.281242	0.461927	0	0	-6.42823e-05	0.957931	0.990395	0.000398438	0.694191	0.934983	0.720044	2.72768e-22	5.66067e-22	4.47636e-13	9.59931e-13
DOC3_DM	0.00400768	0.0735236	0.112619	0.139138	0	0	0.00546013	0.152783	0.893818	0.00167028	0.405946	0.87872	0.646114	6.15834e-23	1.30611e-22	2.70348e-06	4.34809e-06
DOC4_DM	0.00283502	0.1324	0.187891	0.36869	0	0	0.000386994	0.641266	0.980769	2.34726e-05	0.94629	0.988808	0.793785	0.000191893	0.000219144	1.22451e-55	9.08962e-55
DOC5_DM	0.00132917	0.303052	0.367855	0.568502	0	0	0.00212373	0.101731	0.727186	0.000427947	0.741319	0.939187	0.253097	0.00588456	0.00641649	0.0125931	0.016647
DOC6_DM	0.00302011	0.120395	0.17212	0.00936213	4.44089e-16	7.72155e-16	0.00180627	0.527749	0.980769	0.000326822	0.351218	0.847314	0.96178	4.5818e-103	4.42144e-101	6.9904e-15	1.58723e-14
FB4_DM	0.00715933	0.0166765	0.0287371	0.0850393	0	0	-9.28853e-05	0.87708	0.990395	0.000545974	0.622031	0.919716	0.539626	3.79802e-23	8.23615e-23	0.0631567	0.0786403
FROGGER_I	0.0445926	1.62359e-09	5.13694e-09	0.424179	0	0	-0.00159747	0.148344	0.893818	0.0225339	0.066943	0.73256	0.756722	1	1	1.29718e-67	1.31766e-66
FROGGER_LTR	7.50923e-05	0.806672	0.850753	0.0402549	5.82786e-09	7.92096e-09	0.00131346	0.214679	0.920732	0.00392489	0.301176	0.802469	0.154064	0.0104975	0.0113822	0.360434	0.404441
FW	8.95781e-07	0.978677	0.988925	0.101504	0	0	0.0016238	0.452121	0.980769	0.00169783	0.250485	0.802469	0.816329	1.0271e-49	4.12978e-49	1.08404e-06	1.80362e-06
FW2_DM	0.00139868	0.290732	0.358761	0.839098	0	0	0.00256789	0.0172918	0.423612	0.000142611	0.829051	0.95794	0.513337	5.39565e-13	8.13563e-13	6.6678e-05	0.00010133
FW3_DM	0.000754916	0.437712	0.499872	-0.00199805	0.453294	0.46535	-0.00248851	0.768108	0.980769	0.00828806	0.169902	0.802469	0.534004	0.000188024	0.000216004	6.6278e-14	1.4536e-13
G2_DM	0.00100488	0.370556	0.433438	0.178215	0	0	0.000841824	0.562465	0.980769	8.80081e-06	0.953524	0.988808	0.545258	1.26135e-18	2.41031e-18	0.00159984	0.00223746
G3_DM	0.0322417	3.1812e-07	8.1863e-07	0.0249942	1.58307e-05	1.90958e-05	-0.000841136	0.885945	0.990395	0.00280005	0.417466	0.87872	0.43912	0.000653344	0.000728875	2.01338e-08	3.59798e-08
G4_DM	2.2422e-06	0.96627	0.981527	0.22756	0	0	-0.00243484	0.42352	0.980769	0.0160512	0.0220739	0.509113	0.687439	4.25763e-16	7.14542e-16	6.03088e-15	1.38567e-14
G5A_DM	0.034875	1.0339e-07	2.81045e-07	0.0312352	1.07863e-07	1.39715e-07	-0.00204517	0.95732	0.990395	0.00652115	0.168815	0.802469	0.598608	3.46492e-11	4.95355e-11	2.81594e-11	5.60286e-11
G5_DM	0.0135565	0.000969332	0.00199022	0.201199	0	0	-2.20953e-05	0.740296	0.980769	0.00120705	0.462127	0.881266	0.598394	1.22841e-24	2.75678e-24	0.00323917	0.00443376
G6_DM	0.0141228	0.000757237	0.00157147	0.369287	0	0	0.00853564	0.0440884	0.663575	0.000899499	0.54779	0.903619	0.674366	1.53605e-22	3.22237e-22	1.61027e-08	2.9045e-08
G7_DM	0.00795444	0.0116129	0.0209466	0.0408563	2.86433e-08	3.78641e-08	-0.000221661	0.625159	0.980769	0.0018813	0.494859	0.881266	0.150713	0.173504	0.179071	0.0961917	0.118248
G_DM	0.00279281	0.135321	0.190634	0.73295	0	0	8.82483e-05	0.664211	0.980769	0.000241635	0.804358	0.955642	0.365841	0.000210823	0.000239346	9.94872e-05	0.000150008
GTWIN_I	0.263478	5.57179e-55	1.07536e-53	0.096744	0	0	0.00144886	0.539365	0.980769	0.000190066	0.738365	0.939187	0.966455	6.25785e-42	2.11889e-41	3.09255e-100	7.46079e-99
GTWIN_LTR	0.169299	4.92319e-34	4.52465e-33	0.225953	0	0	0.000832677	0.593885	0.980769	5.80311e-05	0.873269	0.976064	0.815167	2.59802e-28	6.59761e-28	1.84086e-22	5.46595e-22
GYPSY10_I	0.0497546	1.77438e-10	5.80432e-10	0.0049848	0.0017822	0.00202332	0.000783591	0.546701	0.980769	0.00215398	0.278024	0.802469	0.854305	4.75287e-37	1.41124e-36	4.35781e-23	1.33501e-22
GYPSY10_LTR	0.00557384	0.0347468	0.0568316	0.223562	0	0	-0.00022251	0.599848	0.980769	0.00311617	0.305172	0.802469	0.425792	3.49577e-12	5.11125e-12	0.0195393	0.0253093
GYPSY11_I	0.0720645	1.13453e-14	4.46865e-14	0.0756267	0	0	-0.00351123	0.726694	0.980769	0.012925	0.0397174	0.540397	0.729921	5.86327e-17	1.02874e-16	1.72984e-19	4.76943e-19
GYPSY11_LTR	0.00092423	0.39049	0.454004	0.0233736	3.05088e-07	3.89947e-07	0.000253225	0.57817	0.980769	0.00164746	0.437108	0.87872	0.368668	2.27598e-13	3.45877e-13	0.389523	0.434554
GYPSY12A_LTR	0.000217156	0.677283	0.738311	0.0175947	3.82669e-06	4.70415e-06	-0.00045795	0.754078	0.980769	0.00239683	0.337654	0.824902	0.593459	2.08447e-19	4.10514e-19	3.24882e-05	4.97637e-05
GYPSY12_I	1.91556e-05	0.901633	0.930562	0.779886	0	0	-0.000630603	0.647707	0.980769	0.0105428	0.177996	0.802469	0.825577	0.0112019	0.0120781	8.17747e-73	9.28384e-72
GYPSY12_LTR	0.0143674	0.000680736	0.00142807	0.180131	0	0	0.00631195	0.0676405	0.72266	0.0086885	0.185991	0.802469	0.891512	2.81372e-06	3.59634e-06	1.93978e-93	3.74377e-92
Gypsy1-I_DM	0.237488	5.9922e-49	9.63745e-48	0.00205097	0.0011306	0.00130662	0.0178179	0.049998	0.663575	0.000928269	0.251361	0.802469	0.973968	3.47527e-77	6.70727e-76	7.37201e-60	5.69119e-59
Gypsy1-LTR_DM	0.0606597	1.61317e-12	5.76559e-12	0.0723716	0	0	0.00361816	0.323191	0.97729	0.000509766	0.515914	0.881266	0.80486	7.36493e-52	3.38436e-51	0.000123019	0.000182636
GYPSY2_I	0.000711399	0.451237	0.512287	0.816585	0	0	-0.0003381	0.862393	0.990395	0.00594457	0.237664	0.802469	0.713847	1.55995e-07	2.10539e-07	5.05458e-30	1.91281e-29
Gypsy2-I_DM	0.0880818	9.89232e-18	4.15047e-17	0.000333487	0.230059	0.238718	0.00757487	0.205624	0.920732	7.172e-05	0.762494	0.939187	0.981637	7.20782e-73	1.15926e-71	1.67529e-88	2.3095e-87
GYPSY2_LTR	0.00314977	0.112703	0.162326	0.507095	0	0	0.00329154	0.0914807	0.72266	0.000163	0.837973	0.95794	0.43658	1.28427e-05	1.57876e-05	1.5306e-06	2.4824e-06
Gypsy2-LTR_DM	0.00766078	0.0132682	0.0234932	0.0235618	3.3773e-13	5.21455e-13	0.0017393	0.491559	0.980769	0.000507943	0.519966	0.881266	0.785296	8.2044e-51	3.51878e-50	0.00153972	0.0021691
GYPSY3_I	0.013261	0.00110286	0.00224054	0.459028	0	0	-0.00135413	0.595266	0.980769	0.0102641	0.125598	0.802469	0.741068	2.96683e-07	3.9219e-07	1.15583e-35	5.18779e-35
GYPSY3_LTR	0.00143194	0.285063	0.354949	-0.000482455	0.336851	0.347659	-0.0013013	0.674817	0.980769	0.00518217	0.259805	0.802469	0.388838	0.000509576	0.000571792	6.07673e-06	9.53503e-06
GYPSY4_I	0.0203436	5.15201e-05	0.000116981	0.00182851	0.05078	0.0550592	-2.2977e-05	0.978114	0.990395	8.03201e-05	0.817037	0.955686	0.785272	4.86066e-43	1.73724e-42	1.07964e-06	1.80362e-06
GYPSY4_LTR	0.0119583	0.00195193	0.0038441	0.00447309	0.00684968	0.00759763	5.97618e-05	0.82858	0.990395	0.000277246	0.702448	0.934983	0.511146	1.15917e-28	2.98294e-28	1	1
GYPSY5_I	0.124801	6.30401e-25	3.92475e-24	0.0857053	0	0	-0.000577594	0.911329	0.990395	0.00210979	0.28162	0.802469	0.922662	1.27383e-38	3.84139e-38	4.94076e-52	3.53173e-51
GYPSY5_LTR	0.231577	1.32197e-47	1.70094e-46	0.0897362	0	0	7.31172e-05	0.633031	0.980769	0.00186198	0.407307	0.87872	0.538058	4.72424e-17	8.36493e-17	0.000651512	0.000938371
GYPSY6A_LTR	0.00240545	0.165785	0.225327	0.0608673	2.04281e-14	3.25837e-14	0.000135065	0.815792	0.990395	3.51627e-06	0.972369	0.988808	0.434623	1.10541e-12	1.65383e-12	0.0179217	0.0233709
GYPSY6_I	0.0386795	2.03657e-08	5.78028e-08	0.457568	0	0	0.00184843	0.351732	0.980769	0.000580161	0.566141	0.905434	0.867497	1.05864e-38	3.24313e-38	2.83165e-25	9.42255e-25
GYPSY6_LTR	0.0323152	3.08304e-07	8.04089e-07	0.0391698	0	0	0.0123426	0.0846374	0.72266	0.00134355	0.195777	0.802469	0.87918	6.72773e-70	7.63796e-69	9.9159e-06	1.54336e-05
GYPSY7_I	0.0011338	0.34152	0.411959	0.172279	0	0	0.000164424	0.816007	0.990395	0.000135995	0.720808	0.939187	0.908607	4.73986e-59	2.95095e-58	2.20496e-20	6.25819e-20
GYPSY7_LTR	0.00144059	0.283612	0.354949	0.118193	0	0	0.000996787	0.577778	0.980769	2.70625e-05	0.903344	0.983813	0.69053	1.6512e-33	4.61856e-33	0.000488608	0.000709033
GYPSY8_I	0.0043455	0.0623747	0.0963065	0.1792	0	0	-0.000300643	0.0160094	0.423612	0.0334228	0.00962212	0.371414	0.380919	0.429206	0.435983	4.03522e-10	7.86664e-10
GYPSY8_LTR	0.000668045	0.465372	0.525244	0.0409769	1.16629e-12	1.78646e-12	-0.00262228	0.493429	0.980769	0.0121061	0.0307415	0.509113	0.358072	1.32404e-14	2.1295e-14	0.755069	0.79633
GYPSY9_I	0.0235828	1.28502e-05	3.0245e-05	0.267411	0	0	-0.00484434	0.262087	0.961155	0.0290951	0.020078	0.509113	0.628121	0.0514226	0.0539379	2.16914e-29	7.89896e-29
GYPSY9_LTR	0.00275304	0.138138	0.193193	0.0210376	4.35634e-06	5.32136e-06	0.00437186	0.152829	0.893818	0.000703926	0.627832	0.919716	0.295389	2.48912e-09	3.45611e-09	0.46637	0.517295
GYPSY_I	0.172989	8.24485e-35	7.95628e-34	0.0662722	0	0	0.00250759	0.403484	0.980769	0.000733713	0.581729	0.905434	0.967086	4.1062e-29	1.08561e-28	7.41925e-127	2.86383e-125
GYPSY_LTR	0.299182	1.28262e-63	2.75051e-62	0.00974776	0.000333211	0.000387408	0.000218228	0.529502	0.980769	0.00402412	0.221069	0.802469	0.874385	8.78101e-24	1.92584e-23	5.0777e-47	3.26665e-46
HELENA_RT	0.0539144	2.9658e-11	1.00421e-10	0.00239953	0.0794417	0.0847086	0.000932173	0.505264	0.980769	0.00201218	0.428654	0.87872	0.82759	3.47279e-17	6.206e-17	4.49954e-40	2.11808e-39
HELITRON1_DM	0.000651853	0.470832	0.528317	0.278866	0	0	-0.000264155	0.897801	0.990395	0.00120676	0.577855	0.905434	0.108681	0.179796	0.184577	0.332687	0.379932
HETA	0.355384	3.85196e-78	1.23905e-76	0.323425	0	0	-0.000287828	0.890711	0.990395	0.00152783	0.489612	0.881266	0.883705	2.98221e-18	5.58802e-18	6.25072e-61	5.24517e-60
HETRP_DM	0.175357	2.60941e-35	2.65061e-34	0.268176	0	0	0.00602528	0.0925587	0.72266	2.41422e-05	0.948633	0.988808	0.898	0.00227518	0.00252362	1.96731e-108	6.32819e-107
HMSBEAGLE_I	0.0752319	2.83973e-15	1.14181e-14	0.0837827	0	0	0.0239183	0.0135762	0.423612	0.0055246	0.0249865	0.509113	0.975864	1.903e-59	1.22427e-58	2.80127e-92	4.50538e-91
HOBO	0.338619	1.10934e-73	3.0586e-72	0.0148595	2.33811e-09	3.22326e-09	0.0052965	0.272427	0.961155	4.59607e-05	0.844368	0.958606	0.925736	6.58021e-55	3.34205e-54	4.00384e-33	1.67987e-32
IDEFIX_I	0.0125316	0.00151759	0.00301954	0.278703	0	0	0.0090341	0.0973531	0.72266	0.000404654	0.4517	0.881266	0.921929	1.65924e-75	2.91121e-74	7.44822e-13	1.57968e-12
IDEFIX_LTR	0.0130074	0.00123215	0.00247714	0.487529	0	0	0.0127761	0.0086055	0.423612	0.000725628	0.492442	0.881266	0.652015	3.9616e-39	1.23321e-38	0.298298	0.342688
I_DM	0.00768874	0.0131007	0.0234114	0.0760595	0	0	0.00131708	0.440091	0.980769	3.87923e-05	0.90735	0.983813	0.324385	4.2829e-11	6.07793e-11	0.481717	0.531266
INVADER1_I	0.00924688	0.00649092	0.0121626	0.104415	0	0	0.000740016	0.612819	0.980769	0.00109112	0.257494	0.802469	0.931642	1.2482e-68	1.26791e-67	1.10335e-22	3.32729e-22
INVADER1_LTR	0.004694	0.0527355	0.0827476	3.75503e-06	0.912094	0.912094	0.00020218	0.815064	0.990395	6.60568e-06	0.946422	0.988808	0.66554	2.36403e-41	7.73319e-41	0.344201	0.390769
INVADER2_I	3.12474e-05	0.874566	0.910931	0.0218585	1.12884e-07	1.45244e-07	0.00041172	0.703328	0.980769	1.37883e-05	0.937999	0.988808	0.454581	8.70101e-21	1.76768e-20	0.562534	0.606531
INVADER2_LTR	0.00561619	0.034063	0.0561894	0.0094321	0.00174565	0.00199355	0.00155242	0.368656	0.980769	0.000691317	0.629029	0.919716	0.259776	6.66808e-09	9.06295e-09	0.814198	0.854023
INVADER3_I	0.0948791	4.82083e-19	2.21529e-18	0.46225	0	0	0.0107467	0.0175591	0.423612	0.000729377	0.650199	0.927628	0.880951	4.57336e-15	7.4173e-15	1.31315e-65	1.26719e-64
INVADER3_LTR	0.0549868	1.8686e-11	6.43999e-11	0.155564	0	0	0.000671387	0.242212	0.961155	0.00865092	0.0937645	0.769229	0.444846	1.8609e-11	2.68025e-11	0.00317475	0.00437661
INVADER4_I	0.0192	8.42298e-05	0.000184731	0.0373126	0	0	0.0164458	0.0431357	0.663575	0.00453317	0.0336358	0.509113	0.938303	2.83311e-62	2.02515e-61	2.00072e-33	8.58089e-33
INVADER4_LTR	0.00268835	0.142863	0.198364	0.0206985	9.51236e-10	1.32078e-09	0.0107355	0.0515732	0.663575	0.0114084	0.0164689	0.509113	0.798989	4.4385e-33	1.22376e-32	5.95508e-15	1.38473e-14
INVADER5_I	0.038873	1.87496e-08	5.40101e-08	0.0459402	1.54757e-08	2.05987e-08	0.00366553	0.0965499	0.72266	0.00548716	0.271443	0.802469	0.391894	0.0232423	0.0247833	4.41863e-08	7.82381e-08
INVADER5_LTR	0.0159822	0.000337705	0.00072419	0.00253672	0.157016	0.163806	0.0091382	0.013619	0.423612	1.08443e-07	0.995806	0.996133	0.0985267	0.256141	0.261562	0.351889	0.397161
INVADER6_I	0.119266	7.97436e-24	4.66379e-23	0.0171347	7.58654e-06	9.20881e-06	0.00274074	0.375144	0.980769	0.00106542	0.525106	0.881266	0.915161	3.75892e-25	8.63656e-25	3.57738e-68	3.83575e-67
INVADER6_LTR	0.0424208	4.11372e-09	1.24054e-08	0.000191696	0.565503	0.577471	0.00104181	0.585004	0.980769	0.000215685	0.764002	0.939187	0.782002	5.27717e-26	1.24207e-25	2.18412e-18	5.69643e-18
IVK_DM	0.0344881	1.21958e-07	3.26915e-07	0.0710189	0	0	0.011401	0.080832	0.72266	0.000566134	0.473065	0.881266	0.765171	1.14173e-54	5.65011e-54	0.133397	0.159911
Jockey	0.105046	5.06032e-21	2.63957e-20	0.129322	0	0	-2.88997e-07	0.99089	0.99089	2.88406e-06	0.954779	0.988808	0.943672	1.13918e-66	1.04696e-65	9.60981e-33	3.94616e-32
JOCKEY2	0.0010724	0.354946	0.420273	0.511067	0	0	-0.000402704	0.816249	0.990395	0.00302066	0.319932	0.81246	0.544649	1.27253e-13	1.96478e-13	5.60802e-06	8.8717e-06
LOOPER1_DM	0.000158733	0.721984	0.774127	0.116007	0	0	0.013197	0.0219271	0.470214	0.00433341	0.149	0.802469	0.504572	5.61712e-25	1.27542e-24	0.540121	0.585637
LTRMDG3_DM	0.455307	2.21663e-107	1.06952e-105	3.31562e-05	0.678823	0.685931	-4.18865e-07	0.961324	0.990395	3.44395e-05	0.833604	0.95794	0.906808	1.54316e-71	1.98553e-70	1.3852e-10	2.72799e-10
M4DM	0.0445494	1.65396e-09	5.14861e-09	-0.000359613	0.00263056	0.002969	0.00926024	0.0924977	0.72266	0.00968252	0.00326286	0.314866	0.889309	3.72483e-57	2.11439e-56	2.20054e-15	5.24326e-15
MARINER2_DM	0.00755843	0.0139004	0.0243889	-0.0123101	0.887934	0.892558	-0.0108943	0.667261	0.980769	0.0342452	0.00530828	0.341499	0.592431	6.29907e-05	7.368e-05	2.02454e-18	5.35256e-18
MAX_I	0.0680197	6.61634e-14	2.45568e-13	0.0109986	0	0	0.000272228	0.754759	0.980769	0.000610989	0.196703	0.802469	0.964616	2.84559e-104	5.492e-102	2.16612e-16	5.29191e-16
MAX_LTR	0.100146	4.57589e-20	2.20787e-19	0.00206759	0.00812431	0.00895995	0.000539171	0.656066	0.980769	0.000872175	0.363876	0.867014	0.777904	1.65773e-56	9.14121e-56	0.101617	0.123346
MDG1_I	0.059246	2.973e-12	1.04325e-11	0.00549735	0.000117751	0.000140284	0.00472614	0.269255	0.961155	0.00239653	0.177949	0.802469	0.964775	8.78746e-52	3.94414e-51	9.79427e-80	1.18143e-78
MDG1_LTR	0.137228	2.00063e-27	1.43008e-26	0.0224293	2.34857e-12	3.56908e-12	-0.0010485	0.837922	0.990395	0.0038678	0.0932658	0.769229	0.91046	3.3142e-49	1.30539e-48	5.74527e-31	2.26293e-30
MDG3_DM	0.367329	2.17455e-81	8.39377e-80	0.00697155	1.53158e-10	2.23935e-10	0.000585313	0.659727	0.980769	0.00107112	0.147914	0.802469	0.976178	1.34026e-90	6.46675e-89	5.80943e-47	3.61684e-46
MICROPIA_I	0.0237559	1.19324e-05	2.84315e-05	0.171485	0	0	0.000857405	0.626087	0.980769	0.000293703	0.504823	0.881266	0.966404	1.10463e-79	2.36882e-78	1.29207e-42	6.73972e-42
MICROPIA_LTR	0.00182336	0.227654	0.296873	0.226893	0	0	2.42586e-05	0.663379	0.980769	0.00258084	0.0998817	0.769229	0.9367	3.08485e-64	2.3815e-63	3.80716e-30	1.46956e-29
NOMAD_I	0.026244	4.11797e-06	1.01893e-05	0.483036	0	0	2.99134e-05	0.899028	0.990395	2.81385e-05	0.91399	0.985476	0.952977	6.10925e-29	1.59336e-28	6.02497e-101	1.66117e-99
NOMAD_LTR	0.0351169	9.32481e-08	2.57098e-07	0.596787	0	0	-9.37359e-05	0.94966	0.990395	0.000759212	0.655312	0.927628	0.859354	1.19033e-12	1.76718e-12	5.10224e-60	4.10305e-59
PLACW_DM	0.00219347	0.185725	0.248923	0.109839	0	0	0.00801031	0.0481538	0.663575	0.000254821	0.783753	0.951348	0.355947	1.79306e-07	2.4032e-07	0.0130346	0.0171135
POGO	0.0341811	1.39032e-07	3.67579e-07	0.095288	0	0	0.0025378	0.336841	0.980769	0.00214613	0.439191	0.87872	0.962487	5.26903e-16	8.76657e-16	7.03031e-147	6.78425e-145
POGON1	0.0615614	1.09186e-12	3.97601e-12	0.0112727	3.81406e-07	4.8112e-07	3.04818e-05	0.931333	0.990395	3.59896e-07	0.986593	0.996133	0.811365	7.02812e-50	2.88602e-49	4.44911e-06	7.09651e-06
PROTOP,PROTOP_A,PROTOP_B	0.000574111	0.498567	0.555745	0.0517636	1.32097e-10	1.94616e-10	-0.000450964	0.769028	0.980769	0.00222065	0.441636	0.87872	0.607954	3.93916e-09	5.3919e-09	3.41372e-14	7.57297e-14
QUASIMODO2-I_DM	0.0103012	0.00405769	0.00767778	0.854314	0	0	0.000117626	0.521755	0.980769	0.000160008	0.874917	0.976064	0.659603	0.999999	1	7.92517e-43	4.24877e-42
QUASIMODO2-LTR_DM	0.0147533	0.00057556	0.00122069	0.50098	0	0	0.000310447	0.500993	0.980769	0.00113472	0.568358	0.905434	0.315364	4.25663e-06	5.36947e-06	0.0259569	0.0329584
QUASIMODO_I	0.00355853	0.0917734	0.137304	0.795249	0	0	0.000969617	0.177799	0.920732	0.00198181	0.418515	0.87872	0.56322	3.20211e-14	5.06563e-14	1.42622e-06	2.33271e-06
QUASIMODO_LTR	0.0209543	3.96377e-05	9.21696e-05	0.834647	0	0	-8.79288e-05	0.7338	0.980769	0.00269248	0.404523	0.87872	0.669713	2.8989e-09	3.99634e-09	1.04276e-20	3.00377e-20
R1-2_DM	0.000293685	0.628392	0.689089	0.0278788	4.50907e-07	5.65097e-07	0.00121792	0.302007	0.97729	0.00248165	0.386809	0.87872	0.192967	4.20437e-05	5.00891e-05	0.651576	0.694775
R1_DM	0.00145611	0.281031	0.354504	0.399335	0	0	-0.000457494	0.572721	0.980769	0.00531504	0.310578	0.802469	0.865985	3.50958e-05	4.20714e-05	6.31867e-82	8.13002e-81
R2_DM	0.0384288	2.26676e-08	6.34037e-08	0.0994677	9.59233e-14	1.51747e-13	7.90919e-07	0.721365	0.980769	0.00127276	0.626143	0.919716	0.973673	1.24077e-05	1.53505e-05	2.65776e-207	5.12948e-205
ROOA_I	1.53051e-05	0.912028	0.936285	0.541114	0	0	0.00106077	0.409832	0.980769	2.68607e-06	0.973438	0.988808	0.65873	3.93214e-23	8.43225e-23	5.25341e-07	8.89393e-07
ROOA_LTR	0.00381406	0.0808602	0.121922	0.834918	0	0	-0.000955329	0.795557	0.990395	0.0182664	0.0419998	0.540397	0.595417	4.64622e-05	5.50135e-05	1.66212e-18	4.45541e-18
ROO_I	0.0015291	0.269283	0.344183	0.0190911	1.73195e-14	2.78555e-14	-2.40852e-05	0.980132	0.990395	8.40362e-05	0.757143	0.939187	0.8349	3.76143e-65	3.02482e-64	0.0101498	0.0135097
ROO_LTR	0.0475949	4.48358e-10	1.44222e-09	0.0052965	0.00138568	0.00159189	0.000233419	0.7802	0.980769	0.000265913	0.684126	0.934983	0.835434	1.61707e-41	5.38095e-41	1.01559e-14	2.27917e-14
ROVER_DM	0.00315819	0.112222	0.162326	0.0132383	1.34902e-08	1.80806e-08	-0.000139734	0.923988	0.990395	0.000552608	0.498791	0.881266	0.790434	1.52541e-51	6.69102e-51	0.00120462	0.0017095
RSP	0.124013	9.05316e-25	5.46019e-24	0.266503	0	0	0.000911776	0.428642	0.980769	1.23774e-05	0.951011	0.988808	0.210896	1.22844e-05	1.52961e-05	0.585936	0.628254
S2_DM	0.000567543	0.501035	0.555745	0.223855	0	0	0.00236458	0.238093	0.961155	0.00302231	0.280626	0.802469	0.48137	3.1577e-17	5.69566e-17	0.0380166	0.0479556
SAR2_DM	0.0192433	8.26747e-05	0.000183405	0.00288408	0.0146082	0.0160192	0.00251924	0.311503	0.97729	0.00261045	0.255782	0.802469	0.565507	2.42111e-27	5.91486e-27	0.145621	0.172422
SAR_DM	0.00198459	0.208145	0.27515	0.284025	0	0	-0.000784649	0.989992	0.99089	0.00337635	0.297766	0.802469	0.195499	1.40903e-06	1.83745e-06	1	1
S_DM	0.0701332	2.63514e-14	9.97218e-14	0.0660034	0	0	0.00120906	0.528824	0.980769	0.00146004	0.2139	0.802469	0.885027	2.07072e-63	1.53711e-62	4.37854e-10	8.45058e-10
STALKER2_I	0.0944975	5.71489e-19	2.56505e-18	0.0208286	1.16129e-13	1.8075e-13	0.00352539	0.35239	0.980769	0.00109333	0.311398	0.802469	0.94734	7.85363e-60	5.22673e-59	4.10048e-44	2.4731e-43
STALKER2_LTR	0.247644	2.78761e-51	4.89099e-50	0.00394761	0.00369284	0.00414371	0.000144853	0.773912	0.980769	0.000637525	0.517971	0.881266	0.883142	1.76343e-44	6.42156e-44	1.53546e-24	4.93906e-24
STALKER3_LTR	0.00554062	0.0352932	0.0572402	0.596864	0	0	-0.000233533	0.302358	0.97729	0.0085149	0.103627	0.769229	0.232562	2.07022e-06	2.66369e-06	0.532526	0.580664
STALKER4_I	0.000211992	0.680929	0.738311	0.292885	0	0	-0.00118485	0.745016	0.980769	0.0063385	0.112886	0.778108	0.763974	7.22705e-24	1.60324e-23	1.63402e-17	4.14955e-17
STALKER4_LTR	0.0023633	0.169545	0.228826	0.552904	0	0	-0.000259783	0.867427	0.990395	0.00204507	0.414773	0.87872	0.570108	6.68395e-14	1.04032e-13	3.62147e-07	6.18534e-07
TABOR_I	0.113671	1.02169e-22	5.79962e-22	0.215192	0	0	0.00316036	0.210056	0.920732	0.00808533	0.0512709	0.618455	0.955481	1.6071e-33	4.56133e-33	5.8609e-96	1.25684e-94
TABOR_LTR	0.136587	2.69688e-27	1.85892e-26	0.297462	0	0	-0.00181372	0.880789	0.990395	0.0081969	0.0916208	0.769229	0.84824	5.47287e-21	1.12369e-20	5.2301e-41	2.52353e-40
TAHRE	0.644143	3.19799e-181	6.17212e-179	0.0487885	1.9984e-15	3.35384e-15	-0.000139489	0.893522	0.990395	0.000661086	0.5792	0.905434	0.772817	1.46089e-29	3.91599e-29	7.88979e-14	1.71093e-13
TART-A	0.470665	2.41253e-112	1.55206e-110	0.0247934	3.00147e-11	4.45602e-11	0.000764875	0.564903	0.980769	0.00198633	0.272722	0.802469	0.918073	3.37772e-42	1.18527e-41	7.09314e-44	4.14841e-43
TART_B1	0.551448	4.49594e-141	4.33858e-139	0.193078	0	0	0.000119208	0.780278	0.980769	0.000324529	0.799787	0.955642	0.931541	1.71484e-06	2.22124e-06	4.02423e-127	1.94169e-125
TC1-2_DM	0.00163646	0.253093	0.327832	0.230964	0	0	-0.000383797	0.772876	0.980769	0.00228302	0.333611	0.824902	0.464952	8.50129e-19	1.64075e-18	0.191425	0.223909
TC1_DM	0.00133831	0.301394	0.367855	0.260678	0	0	0.00102552	0.254726	0.961155	0.00549176	0.233897	0.802469	0.468853	3.51972e-06	4.46912e-06	1.32405e-07	2.32083e-07
TIRANT_I	0.150579	3.79263e-30	2.92791e-29	0.0289714	4.88498e-15	7.98984e-15	0.0134309	0.0775704	0.72266	0.000538955	0.519264	0.881266	0.954053	3.43823e-52	1.61848e-51	2.26507e-62	1.98708e-61
TIRANT_LTR	0.101511	2.47974e-20	1.22715e-19	0.0207727	1.06137e-13	1.66541e-13	0.001547	0.546399	0.980769	0.000228519	0.638493	0.926535	0.930484	1.23507e-60	8.51314e-60	7.58948e-30	2.81687e-29
TLD1	9.73443e-05	0.780527	0.827702	0.0309842	6.95192e-08	9.06568e-08	-0.00172741	0.492835	0.980769	0.00758339	0.149795	0.802469	0.0516848	0.129945	0.134835	1	1
TLD2	0.00139227	0.291842	0.358761	0.282621	0	0	-0.00157219	0.581336	0.980769	0.00837858	0.163286	0.802469	0.253453	0.112681	0.117554	0.00092909	0.00132826
Transib1	0.00105467	0.358957	0.422431	0.338304	0	0	-0.00303313	0.712262	0.980769	0.0153936	0.0292071	0.509113	0.685228	2.15322e-14	3.43448e-14	2.00375e-16	4.95801e-16
TRANSIB2	0.00257737	0.151398	0.208713	0.0296631	3.09144e-08	4.05883e-08	-1.59273e-05	0.974629	0.990395	6.0404e-05	0.884176	0.977198	0.608475	5.92868e-17	1.03084e-16	1.77442e-07	3.0577e-07
TRANSIB3	0.00338764	0.0999568	0.146149	0.0833478	0	0	0.00166949	0.20819	0.920732	0.00983785	0.0721173	0.73256	0.651303	1.09883e-15	1.81261e-15	1.08271e-11	2.24692e-11
Transib4	0.00352136	0.0934895	0.138796	0.470182	0	0	0.00126404	0.299273	0.97729	0.00256364	0.307679	0.802469	0.500746	2.71926e-19	5.30119e-19	0.0508875	0.0637745
Transib5	0.0194467	7.57472e-05	0.000169991	0.35636	0	0	-0.000129933	0.939788	0.990395	0.000685185	0.577595	0.905434	0.698127	4.40235e-27	1.06207e-26	1.33478e-07	2.32083e-07
Transib-N1_DM	0.00729881	0.0156467	0.0272055	0.020746	3.69199e-07	4.68786e-07	-0.00130669	0.964393	0.990395	0.00412509	0.197295	0.802469	0.371483	3.07943e-16	5.21342e-16	0.905034	0.939094
TRANSPAC_I	0.0261836	4.22555e-06	1.03232e-05	0.00039138	0.127083	0.134028	0.00341559	0.395024	0.980769	8.8689e-07	0.966996	0.988808	0.935827	4.89328e-89	1.574e-87	1.03917e-09	1.98574e-09
TRANSPAC_LTR	0.126443	2.96021e-25	1.9044e-24	0.00413279	0.000154372	0.000182784	0.00121399	0.593299	0.980769	0.000189346	0.643519	0.926859	0.888663	4.29893e-66	3.77133e-65	2.50324e-09	4.64543e-09
XDMR	0.00882432	0.00784452	0.014419	0.0329387	2.0538e-10	2.95808e-10	0.000608208	0.501987	0.980769	0.00191015	0.373917	0.87872	0.408942	6.7037e-18	1.2322e-17	0.688452	0.730061
ZAM_I	0.180632	1.98674e-36	2.13023e-35	0.0469109	2.14131e-10	3.03878e-10	0.00378546	0.179418	0.920732	0.000856416	0.617971	0.919716	0.37681	2.0263e-07	2.69708e-07	0.00365696	0.00493562
ZAM_LTR	0.225926	2.48966e-46	3.00316e-45	0.0274644	6.37007e-09	8.59736e-09	0.000257061	0.760894	0.980769	0.000246936	0.74753	0.939187	0.776707	4.85371e-26	1.1565e-25	1.78912e-17	4.48442e-17

## Sheet: Table S6D
RepBase Sequence ID	% Var Explained by DNA Copy #	DNA Copy # Effect P-value	DNA Copy # Effect FDR	Wolbachia Effect P-value	Wolbachia Effect FDR	H2	Line Effect P-value (Copy # Independent)	Line Effect FDR (Copy # Independent)
ACCORD2_I	0.0354908	0.000150647	0.000363436	0.0271614	0.476559	0.73494	0	0
ACCORD2_LTR	2.87286e-05	0.914897	0.927086	0.439964	0.927329	0.0745948	0.291939	0.294996
ACCORD_I	0.0422094	3.46736e-05	8.80528e-05	0.658432	0.947482	0.94299	0	0
ACCORD_LTR	0.0607971	5.93612e-07	1.76257e-06	0.0635028	0.668925	0.774918	0	0
ARS406_DM	0.00188467	0.38652	0.475149	0.51608	0.927329	0.0928243	0.189362	0.192352
BAGGINS1	0.00146748	0.444846	0.536595	0.554823	0.933182	0.51977	2.33147e-15	3.28448e-15
BARI_DM	0.0530731	3.22613e-06	9.02382e-06	0.136461	0.668925	0.904433	0	0
BATUMI_I	0.0012905	0.473712	0.560898	0.728639	0.956648	0.798835	0	0
BATUMI_LTR	0.000647143	0.611965	0.694576	0.606974	0.947482	0.689195	0	0
BEL_I	0.130576	8.78836e-14	4.84615e-13	0.19779	0.706916	0.964446	0	0
BEL_LTR	0.31031	5.56619e-34	1.19364e-32	0.859703	0.97857	0.801597	0	0
Bica_I	0.0129934	0.0226033	0.0411551	0.406873	0.926306	0.842433	0	0
Bica_LTR	0.00100963	0.5263	0.615611	0.252188	0.797908	0.25164	0.000306764	0.000330757
BLASTOPIA_I	0.132298	5.88618e-14	3.34127e-13	0.467458	0.927329	0.976544	0	0
BLASTOPIA_LTR	0.193724	2.20813e-20	1.85291e-19	0.693159	0.947482	0.948185	0	0
BLOOD_I	0.0657418	2.002e-07	6.23205e-07	0.647091	0.947482	0.959251	0	0
BLOOD_LTR	0.196275	1.16764e-20	1.07311e-19	0.497912	0.927329	0.906879	0	0
BS	0.0888184	1.1977e-09	4.81576e-09	0.0163086	0.349728	0.977471	0	0
BS2	0.0203178	0.00428354	0.00879494	0.694283	0.947482	0.507058	1.38778e-14	1.91315e-14
BS3_DM	0.0037284	0.223024	0.298914	0.2769	0.835027	0.50688	1.42109e-14	1.94517e-14
BS4_DM	0.000139685	0.813708	0.858173	0.344617	0.852705	2.40263e-14	1	1
BURDOCK_I	0.145281	2.80092e-15	1.7438e-14	0.333913	0.852705	0.956199	0	0
BURDOCK_LTR	0.093421	4.26842e-10	1.79088e-09	0.344329	0.852705	0.8787	0	0
Chimpo_I	0.0184778	0.00647308	0.0130136	0.96065	0.993873	0.628818	0	0
Chimpo_LTR	0.00622975	0.115004	0.170737	0.133468	0.668925	0.164035	0.0197846	0.0207524
Chouto_I	0.178894	8.63073e-19	6.40665e-18	0.195439	0.706916	0.863708	0	0
Chouto_LTR	0.00512096	0.153128	0.21572	0.302211	0.841571	0.371573	5.30068e-08	6.27627e-08
CIRCE	0.0143776	0.0164269	0.0310822	0.0398708	0.591928	0.681175	0	0
Copia1-I_DM	0.0367072	0.000115442	0.000282028	0.897871	0.97857	0.88877	0	0
Copia1-LTR_DM	0.00301277	0.273445	0.351832	0.0860584	0.668925	0.60475	0	0
COPIA2I_DM	0.0174643	0.00813541	0.0161869	0.797022	0.975685	0.793656	0	0
COPIA2LTR_DM	0.0842804	3.29999e-09	1.22481e-08	0.647089	0.947482	0.429579	1.81635e-10	2.27633e-10
COPIA_DM_I	0.0421231	3.53334e-05	8.85629e-05	0.49741	0.927329	0.968658	0	0
COPIA_DM_LTR	0.00464799	0.173564	0.242712	0.23697	0.785264	0.353099	2.59367e-07	2.99748e-07
DIVER2_I	0.00892005	0.0591294	0.0935408	0.515715	0.927329	0.33916	8.05185e-07	9.14121e-07
DIVER2_LTR	0.0278538	0.000805264	0.00176609	0.821787	0.977004	0.496149	6.12843e-14	8.32949e-14
DIVER_I	0.134645	3.40475e-14	1.99126e-13	0.186406	0.705417	0.97076	0	0
DIVER_LTR	0.0873814	1.65159e-09	6.37514e-09	0.513041	0.927329	0.888499	0	0
DM1731_I	0.00136024	0.461993	0.553817	0.327789	0.852705	0.972196	0	0
DM1731_LTR	0.0264928	0.00108714	0.0023575	0.309593	0.841571	0.858059	0	0
DM176	0.0168625	0.00932227	0.0181737	0.452728	0.927329	0.910029	0	0
DM297_I	0.0123075	0.0265075	0.0456782	0.196569	0.706916	0.949173	0	0
DM297_LTR	0.101944	6.24956e-11	2.74128e-10	0.501318	0.927329	0.855931	0	0
DM412B_LTR,DM412_LTR	0.150721	7.7228e-16	5.13966e-15	0.132734	0.668925	0.858999	0	0
DM412_I	0.0546041	2.30746e-06	6.54911e-06	0.59712	0.947482	0.92022	0	0
DMCR1A	0.000322067	0.72047	0.794576	0.245104	0.788416	0.366514	8.27051e-08	9.67399e-08
DMHMR1	0.00310111	0.266513	0.349551	0.782997	0.975685	0.632986	0	0
DMHMR2	0.180232	6.2156e-19	4.79844e-18	0.523662	0.927329	0.369062	6.61683e-08	7.78688e-08
DMLTR5	0.104544	3.46741e-11	1.5563e-10	0.000946187	0.091307	0.831628	0	0
DMRP1	0.00229703	0.339023	0.424879	0.652549	0.947482	0.299903	1.47184e-05	1.64199e-05
DMRT1A	0.0245656	0.0016647	0.00353063	0.359094	0.87728	0.624619	0	0
DMRT1B	0.00411776	0.200299	0.276127	0.797926	0.975685	0.899967	0	0
DMRT1C	1.40701e-07	0.994033	0.994033	0.225351	0.763031	0.349793	3.40996e-07	3.91739e-07
DMSAT6	0.00156118	0.430656	0.522746	0.388404	0.916207	0.149553	0.0338254	0.0352881
DMTOM1_LTR	0.00930478	0.0538942	0.0866799	0.689279	0.947482	0.294012	2.19873e-05	2.41111e-05
DNAREP1_DM	7.16149e-05	0.866013	0.898605	0.90971	0.97857	0.417877	6.24207e-10	7.72256e-10
DOC	0.0286471	0.000676193	0.00153536	0.696034	0.947482	0.890697	0	0
DOC2_DM	0.00623881	0.114739	0.170737	0.904708	0.97857	0.703337	0	0
DOC3_DM	0.0046214	0.174803	0.242712	0.0941044	0.668925	0.666083	0	0
DOC4_DM	0.00248583	0.319902	0.403537	0.530658	0.931063	0.461679	4.77385e-12	6.26771e-12
DOC5_DM	0.00573991	0.130362	0.189172	0.159991	0.671268	0.488082	1.77636e-13	2.36439e-13
DOC6_DM	0.00260375	0.308674	0.391935	0.449861	0.927329	0.961779	0	0
FB4_DM	0.00571032	0.13136	0.189197	0.930886	0.981754	0.541376	1.11022e-16	1.57554e-16
FROGGER_I	0.195885	1.28738e-20	1.12938e-19	0.976765	0.995063	0.695089	0	0
FROGGER_LTR	0.00130568	0.471121	0.560898	0.152501	0.668925	0.200664	0.00422612	0.00445705
FW	7.27315e-05	0.864983	0.898605	0.306741	0.841571	0.841031	0	0
FW2_DM	0.0115156	0.0318968	0.0540007	0.057199	0.668925	0.572112	0	0
FW3_DM	0.000351426	0.708563	0.785935	0.327662	0.852705	0.543813	1.11022e-16	1.57554e-16
G2_DM	0.0166408	0.00980286	0.0189195	0.547166	0.933182	0.666542	0	0
G3_DM	0.041519	4.03197e-05	9.97655e-05	0.503015	0.927329	0.398427	4.38489e-09	5.28928e-09
G4_DM	0.0011212	0.504276	0.593446	0.0606647	0.668925	0.656294	0	0
G5A_DM	0.0640533	2.90264e-07	8.89221e-07	0.485471	0.927329	0.56578	0	0
G5_DM	0.0198825	0.00472204	0.0095932	0.997497	0.997497	0.546941	0	0
G6_DM	0.0670684	1.49487e-07	4.72966e-07	0.0196	0.37828	0.788507	0	0
G7_DM	0.00514968	0.151978	0.215674	0.390132	0.916207	0.250859	0.00032076	0.000343926
G_DM	0.0439386	2.37641e-05	6.19793e-05	0.472336	0.927329	0.440823	5.3013e-11	6.77584e-11
GTWIN_I	0.281302	2.12425e-30	3.52354e-29	0.633205	0.947482	0.966502	0	0
GTWIN_LTR	0.228853	2.87481e-24	2.77419e-23	0.681712	0.947482	0.803328	0	0
GYPSY10_I	0.0484617	8.84437e-06	2.37078e-05	0.877327	0.97857	0.842928	0	0
GYPSY10_LTR	0.00214922	0.355076	0.442127	0.962975	0.993873	0.252609	0.000290212	0.000314668
GYPSY11_I	0.0892827	1.07951e-09	4.43288e-09	0.320951	0.852705	0.743994	0	0
GYPSY11_LTR	0.00301359	0.273379	0.351832	0.897394	0.97857	0.412622	1.07015e-09	1.30721e-09
GYPSY12A_LTR	0.000281429	0.738009	0.804722	0.87372	0.97857	0.594715	0	0
GYPSY12_I	0.000587417	0.628891	0.705675	0.306981	0.841571	0.880343	0	0
GYPSY12_LTR	0.0102523	0.0429766	0.0704948	0.0705114	0.668925	0.912084	0	0
Gypsy1-I_DM	0.234354	6.83744e-25	7.33125e-24	0.0633427	0.668925	0.970164	0	0
Gypsy1-LTR_DM	0.0685789	1.0716e-07	3.50541e-07	0.394016	0.916207	0.761056	0	0
GYPSY2_I	0.000103108	0.839562	0.880628	0.666286	0.947482	0.7578	0	0
Gypsy2-I_DM	0.0865992	1.967e-09	7.44376e-09	0.149039	0.668925	0.985702	0	0
GYPSY2_LTR	0.00696228	0.0956159	0.145808	0.177573	0.686634	0.490501	1.29452e-13	1.73502e-13
Gypsy2-LTR_DM	0.00679702	0.0996559	0.150262	0.344326	0.852705	0.73632	0	0
GYPSY3_I	0.0281138	0.000760437	0.00168695	0.671677	0.947482	0.775551	0	0
GYPSY3_LTR	4.22908e-05	0.896838	0.923043	0.753271	0.969209	0.404209	2.48857e-09	3.02072e-09
GYPSY4_I	0.0209747	0.00369865	0.00767569	0.948226	0.98923	0.768267	0	0
GYPSY4_LTR	0.0127744	0.0237809	0.0421074	0.71238	0.948202	0.460426	5.54301e-12	7.17987e-12
GYPSY5_I	0.120851	8.34563e-13	4.13002e-12	0.803802	0.975685	0.942476	0	0
GYPSY5_LTR	0.245049	4.0708e-26	4.9104e-25	0.981175	0.995063	0.642982	0	0
GYPSY6A_LTR	0.00536681	0.14359	0.205281	0.835898	0.977004	0.417623	6.4082e-10	7.8776e-10
GYPSY6_I	0.0702977	7.33424e-08	2.44053e-07	0.261562	0.814217	0.891113	0	0
GYPSY6_LTR	0.0345276	0.000186016	0.000443224	0.151342	0.668925	0.860121	0	0
GYPSY7_I	0.000634724	0.615402	0.694576	0.840325	0.977004	0.859867	0	0
GYPSY7_LTR	0.00018205	0.787915	0.840152	0.49046	0.927329	0.546444	0	0
GYPSY8_I	0.000281504	0.737976	0.804722	0.000724414	0.091307	0.424893	2.99496e-10	3.72921e-10
GYPSY8_LTR	0.00343883	0.241933	0.319816	0.112888	0.668925	0.269072	0.000109295	0.000119175
GYPSY9_I	0.0102402	0.0431005	0.0704948	0.0056624	0.273211	0.433769	1.15395e-10	1.46522e-10
GYPSY9_LTR	0.0116911	0.0306116	0.0522836	0.149311	0.668925	0.226419	0.0012065	0.00127942
GYPSY_I	0.187295	1.09026e-19	8.76748e-19	0.70202	0.947482	0.969439	0	0
GYPSY_LTR	0.321891	1.88033e-35	4.53629e-34	0.276794	0.835027	0.872998	0	0
HELENA_RT	0.0628006	3.82289e-07	1.15284e-06	0.625383	0.947482	0.71232	0	0
HELITRON1_DM	0.00175359	0.403569	0.492968	0.701963	0.947482	0.101023	0.153008	0.156247
HETA	0.461672	1.76466e-55	8.51448e-54	0.775243	0.975685	0.916403	0	0
HETRP_DM	0.281191	2.1908e-30	3.52354e-29	0.103813	0.668925	0.896064	0	0
HMSBEAGLE_I	0.081483	6.15274e-09	2.24053e-08	0.00330907	0.212883	0.979432	0	0
HOBO	0.332755	7.43602e-37	2.05022e-35	0.211421	0.728649	0.926145	0	0
IDEFIX_I	0.0128183	0.0235397	0.0420664	0.0940071	0.668925	0.938012	0	0
IDEFIX_LTR	0.014489	0.0160125	0.0305981	0.00870459	0.279997	0.70074	0	0
I_DM	0.000913602	0.546666	0.635582	0.473836	0.927329	0.470811	1.57863e-12	2.08681e-12
INVADER1_I	0.00969196	0.0491169	0.0796602	0.435331	0.927329	0.930423	0	0
INVADER1_LTR	0.0134094	0.0205296	0.0380982	0.792146	0.975685	0.675497	0	0
INVADER2_I	3.58508e-05	0.904976	0.924129	0.707559	0.948202	0.508958	1.06581e-14	1.47987e-14
INVADER2_LTR	0.00383148	0.216723	0.29456	0.646098	0.947482	0.248338	0.000370045	0.000394578
INVADER3_I	0.231806	1.33152e-24	1.35255e-23	0.0149511	0.349728	0.893252	0	0
INVADER3_LTR	0.0556232	1.84592e-06	5.31736e-06	0.0845289	0.668925	0.389514	1.02814e-08	1.23249e-08
INVADER4_I	0.0248939	0.00154797	0.00331954	0.104494	0.668925	0.926634	0	0
INVADER4_LTR	0.00378127	0.219765	0.296606	0.291437	0.841571	0.728562	0	0
INVADER5_I	0.0124376	0.025717	0.0447152	0.124152	0.668925	0.461093	5.11957e-12	6.6762e-12
INVADER5_LTR	0.0221924	0.00281931	0.00591441	0.106096	0.668925	0.149013	0.0344804	0.0357781
INVADER6_I	0.124581	3.52874e-13	1.79223e-12	0.121551	0.668925	0.893869	0	0
INVADER6_LTR	0.0770323	1.65328e-08	5.90896e-08	0.523725	0.927329	0.697222	0	0
IVK_DM	0.0424441	3.29407e-05	8.47674e-05	0.127168	0.668925	0.781249	0	0
Jockey	0.118868	1.31714e-12	6.35522e-12	0.980375	0.995063	0.953835	0	0
JOCKEY2	0.00019668	0.779768	0.836085	0.822573	0.977004	0.630026	0	0
LOOPER1_DM	2.7006e-05	0.917479	0.927086	0.00741045	0.279997	0.553721	0	0
LTRMDG3_DM	0.448671	2.06623e-53	7.97565e-52	0.904594	0.97857	0.886453	0	0
M4DM	0.0311141	0.000393167	0.000903349	0.0113069	0.311746	0.872766	0	0
MARINER2_DM	0.00694848	0.0959463	0.145808	0.175932	0.686634	0.618658	0	0
MAX_I	0.0767223	1.77091e-08	6.21428e-08	0.587306	0.944583	0.960169	0	0
MAX_LTR	0.112758	5.34441e-12	2.51578e-11	0.832545	0.977004	0.750119	0	0
MDG1_I	0.0684566	1.10087e-07	3.54114e-07	0.474508	0.927329	0.965471	0	0
MDG1_LTR	0.148652	1.2616e-15	8.1163e-15	0.744501	0.964354	0.908299	0	0
MDG3_DM	0.374191	2.01976e-42	6.49688e-41	0.456112	0.927329	0.979779	0	0
MICROPIA_I	0.0317541	0.000341645	0.000794428	0.575382	0.933182	0.972729	0	0
MICROPIA_LTR	0.00361901	0.22995	0.306072	0.468029	0.927329	0.936907	0	0
NOMAD_I	0.0525033	3.65449e-06	1.0076e-05	0.924594	0.981754	0.96828	0	0
NOMAD_LTR	0.101674	6.64284e-11	2.84904e-10	0.87178	0.97857	0.871345	0	0
PLACW_DM	0.0114768	0.0321886	0.0540127	0.123659	0.668925	0.29701	1.79442e-05	1.99036e-05
POGO	0.00737089	0.0863688	0.133353	0.643954	0.947482	0.969096	0	0
POGON1	0.0746786	2.78487e-08	9.59786e-08	0.947066	0.98923	0.800871	0	0
PROTOP,PROTOP_A,PROTOP_B	0.00200758	0.371448	0.459548	0.871409	0.97857	0.641387	0	0
QUASIMODO2-I_DM	0.0882643	1.35577e-09	5.34009e-09	0.573108	0.933182	0.739037	0	0
QUASIMODO2-LTR_DM	0.0328411	0.000269173	0.000633541	0.407959	0.926306	0.347638	4.06926e-07	4.64715e-07
QUASIMODO_I	0.0131139	0.0219814	0.0404039	0.127679	0.668925	0.671737	0	0
QUASIMODO_LTR	0.161372	6.0626e-17	4.17886e-16	0.547235	0.933182	0.793891	0	0
R1-2_DM	0.000695886	0.598865	0.688469	0.177885	0.686634	0.126928	0.0721497	0.0740685
R1_DM	0.00738002	0.0861734	0.133353	0.288198	0.841571	0.885078	0	0
R2_DM	0.0512053	4.85448e-06	1.3196e-05	0.620296	0.947482	0.977869	0	0
ROOA_I	1.65577e-05	0.93534	0.940212	0.4589	0.927329	0.714012	0	0
ROOA_LTR	0.0128836	0.0231862	0.0418218	0.240055	0.785264	0.622663	0	0
ROO_I	0.000151558	0.806103	0.854824	0.926239	0.981754	0.848943	0	0
ROO_LTR	0.0572215	1.30054e-06	3.80309e-06	0.893715	0.97857	0.869157	0	0
ROVER_DM	0.00308128	0.26805	0.349551	0.76742	0.975685	0.856818	0	0
RSP	0.259643	8.13289e-28	1.12118e-26	0.30478	0.841571	0.330562	1.57628e-06	1.77908e-06
S2_DM	0.0059096	0.124799	0.183864	0.094504	0.668925	0.431213	1.52297e-10	1.92113e-10
SAR2_DM	0.0168866	0.00927157	0.0181737	0.206406	0.724297	0.621876	0	0
SAR_DM	0.000573091	0.633108	0.7063	0.539035	0.933182	0.145594	0.0388903	0.0401382
S_DM	0.0727016	4.31267e-08	1.46026e-07	0.774866	0.975685	0.881303	0	0
STALKER2_I	0.129027	1.25959e-13	6.75282e-13	0.572118	0.933182	0.954943	0	0
STALKER2_LTR	0.282283	1.61555e-30	3.11802e-29	0.994068	0.997497	0.885906	0	0
STALKER3_LTR	0.0141112	0.0174636	0.0327231	0.0392983	0.591928	0.296845	1.81477e-05	2.00143e-05
STALKER4_I	0.000680799	0.602856	0.688469	0.719782	0.951493	0.836142	0	0
STALKER4_LTR	0.00406819	0.203035	0.277913	0.799277	0.975685	0.706804	0	0
TABOR_I	0.171917	4.73841e-18	3.38709e-17	0.111416	0.668925	0.974465	0	0
TABOR_LTR	0.241755	9.74409e-26	1.10624e-24	0.575029	0.933182	0.877333	0	0
TAHRE	0.684607	9.01445e-102	1.73979e-99	0.912656	0.97857	0.816044	0	0
TART-A	0.510515	1.0112e-63	6.50536e-62	0.388938	0.916207	0.926377	0	0
TART_B1	0.662249	7.61223e-96	7.3458e-94	0.65172	0.947482	0.936605	0	0
TC1-2_DM	0.00068241	0.602427	0.688469	0.815332	0.977004	0.492492	9.9698e-14	1.34557e-13
TC1_DM	0.00919949	0.0552764	0.0881682	0.115354	0.668925	0.450031	1.86858e-11	2.40424e-11
TIRANT_I	0.141134	7.44141e-15	4.4881e-14	0.131152	0.668925	0.957583	0	0
TIRANT_LTR	0.104871	3.21972e-11	1.47954e-10	0.488772	0.927329	0.926794	0	0
TLD1	0.000248072	0.753491	0.812423	0.156961	0.671268	0.0708134	0.317162	0.318813
TLD2	4.0422e-05	0.89913	0.923043	0.652769	0.947482	0.323025	2.79366e-06	3.13474e-06
Transib1	0.000255244	0.75007	0.812423	0.143981	0.668925	0.643827	0	0
TRANSIB2	0.00578411	0.128887	0.188448	0.984751	0.995063	0.62365	0	0
TRANSIB3	0.00289233	0.283263	0.362052	0.827548	0.977004	0.639346	0	0
Transib4	0.0126713	0.0243569	0.0427352	0.166043	0.681835	0.512708	6.32827e-15	8.85041e-15
Transib5	0.0446395	2.03895e-05	5.39064e-05	0.850702	0.97857	0.668292	0	0
Transib-N1_DM	0.0114406	0.0324636	0.0540127	0.572197	0.933182	0.359959	1.45518e-07	1.69187e-07
TRANSPAC_I	0.0285074	0.000697308	0.00156489	0.414661	0.927329	0.954704	0	0
TRANSPAC_LTR	0.124661	3.46472e-13	1.79223e-12	0.68908	0.947482	0.921415	0	0
XDMR	0.00856476	0.0644438	0.101119	0.867592	0.97857	0.383891	1.7375e-08	2.06998e-08
ZAM_I	0.250927	8.49217e-27	1.09266e-25	0.143806	0.668925	0.693111	0	0
ZAM_LTR	0.279009	4.01978e-30	5.96782e-29	0.737309	0.961491	0.770821	0	0

## Sheet: Table S6E
RepBase Sequence ID	% Var Explained by DNA Copy #	DNA Copy # Effect P-value	DNA Copy # Effect FDR	Wolbachia Effect P-value	Wolbachia Effect FDR	H2	Line Effect P-value (Copy # Independent)	Line Effect FDR (Copy # Independent)
ACCORD2_I	0.0253167	0.00140974	0.00330722	0.124459	0.983079	0.601978	0	0
ACCORD2_LTR	0.000366102	0.702822	0.775113	0.459466	0.983079	0.33402	1.20604e-06	1.4022e-06
ACCORD_I	0.0161586	0.0109371	0.0208996	0.168887	0.983079	0.940598	0	0
ACCORD_LTR	0.0247517	0.00159749	0.00362724	0.88203	0.983079	0.849357	0	0
ARS406_DM	0.0169779	0.00908167	0.0178086	0.505457	0.983079	0.232463	0.000880388	0.000970942
BAGGINS1	0.000288678	0.734782	0.801203	0.932903	0.983079	0.448431	2.24487e-11	2.90779e-11
BARI_DM	0.0424228	3.30938e-05	8.87097e-05	0.0428546	0.754256	0.91909	0	0
BATUMI_I	0.00361784	0.230026	0.302007	0.207411	0.983079	0.792737	0	0
BATUMI_LTR	0.00102472	0.523222	0.612011	0.929921	0.983079	0.593012	0	0
BEL_I	0.134175	3.79954e-14	2.52866e-13	0.249459	0.983079	0.949975	0	0
BEL_LTR	0.299281	1.3317e-32	3.21274e-31	0.724611	0.983079	0.858585	0	0
Bica_I	0.00142461	0.451579	0.537992	0.0905101	0.831831	0.808062	0	0
Bica_LTR	0.0179355	0.00731437	0.0148597	0.389521	0.983079	0.206794	0.00317668	0.00344438
BLASTOPIA_I	0.205783	1.06869e-21	1.21328e-20	0.535378	0.983079	0.967981	0	0
BLASTOPIA_LTR	0.280825	2.42572e-30	3.90136e-29	0.679684	0.983079	0.946208	0	0
BLOOD_I	0.0972721	1.7947e-10	7.91048e-10	0.779876	0.983079	0.95256	0	0
BLOOD_LTR	0.221907	1.73874e-23	2.23718e-22	0.338065	0.983079	0.909582	0	0
BS	0.0972506	1.80343e-10	7.91048e-10	0.0207611	0.747416	0.981154	0	0
BS2	0.000143911	0.810963	0.870364	0.838371	0.983079	0.564689	0	0
BS3_DM	0.00210111	0.360523	0.440385	0.874787	0.983079	0.479027	5.66991e-13	7.81637e-13
BS4_DM	0.000637198	0.614714	0.697881	0.296506	0.983079	0.192904	0.0059971	0.0063947
BURDOCK_I	0.168158	1.17959e-17	9.48585e-17	0.23965	0.983079	0.922658	0	0
BURDOCK_LTR	0.134976	3.15148e-14	2.17227e-13	0.551643	0.983079	0.849129	0	0
Chimpo_I	0.00604849	0.120441	0.178809	0.391899	0.983079	0.537363	2.22045e-16	3.32206e-16
Chimpo_LTR	0.00412978	0.199642	0.275221	0.894311	0.983079	0.334593	1.15336e-06	1.34908e-06
Chouto_I	0.290922	1.42997e-31	3.06649e-30	0.290263	0.983079	0.888878	0	0
Chouto_LTR	0.00629246	0.113186	0.172008	0.221695	0.983079	0.544516	1.11022e-16	1.68719e-16
CIRCE	0.00567355	0.132612	0.191001	0.354365	0.983079	0.801204	0	0
Copia1-I_DM	0.0088425	0.0602485	0.098542	0.960356	0.986656	0.796113	0	0
Copia1-LTR_DM	0.000377205	0.698566	0.774847	0.207792	0.983079	0.495682	6.52811e-14	9.33278e-14
COPIA2I_DM	0.00250997	0.31756	0.403218	0.784694	0.983079	0.667671	0	0
COPIA2LTR_DM	0.0577278	1.16392e-06	3.62317e-06	0.61594	0.983079	0.365168	9.2977e-08	1.11457e-07
COPIA_DM_I	0.0444456	2.12721e-05	5.78241e-05	0.864812	0.983079	0.95389	0	0
COPIA_DM_LTR	0.016313	0.0105599	0.0203806	0.455363	0.983079	0.424068	3.2679e-10	4.06907e-10
DIVER2_I	0.00140502	0.454708	0.538397	0.913846	0.983079	0.155739	0.0270343	0.0282033
DIVER2_LTR	0.012783	0.0237335	0.0432129	0.647267	0.983079	0.457674	7.67753e-12	1.02191e-11
DIVER_I	0.0958105	2.49427e-10	1.06976e-09	0.166541	0.983079	0.968949	0	0
DIVER_LTR	0.131181	7.63416e-14	4.75288e-13	0.851217	0.983079	0.883822	0	0
DM1731_I	0.00613348	0.117857	0.177706	0.942735	0.983079	0.846945	0	0
DM1731_LTR	0.0627492	3.86635e-07	1.28656e-06	0.691211	0.983079	0.639906	0	0
DM176	0.0252767	0.00142228	0.00330722	0.192898	0.983079	0.83563	0	0
DM297_I	0.00967997	0.049258	0.0819551	0.45497	0.983079	0.949263	0	0
DM297_LTR	0.0980732	1.49821e-10	6.88461e-10	0.372473	0.983079	0.815082	0	0
DM412B_LTR,DM412_LTR	0.182672	3.41251e-19	2.9937e-18	0.141135	0.983079	0.856982	0	0
DM412_I	0.0514637	4.58769e-06	1.34155e-05	0.54314	0.983079	0.920414	0	0
DMCR1A	0.00188662	0.386274	0.468873	0.561743	0.983079	0.435111	9.96596e-11	1.25714e-10
DMHMR1	0.000460317	0.668792	0.750447	0.751234	0.983079	0.91709	0	0
DMHMR2	0.125785	2.67099e-13	1.47286e-12	0.440188	0.983079	0.463027	4.06286e-12	5.48344e-12
DMLTR5	0.102777	5.1759e-11	2.49737e-10	0.00259569	0.500967	0.793085	0	0
DMRP1	0.00178671	0.39916	0.481487	0.0381956	0.754256	0.268072	0.000116187	0.000130373
DMRT1A	0.0122654	0.0267687	0.0478367	0.811868	0.983079	0.715178	0	0
DMRT1B	0.00494163	0.160536	0.227819	0.924089	0.983079	0.91563	0	0
DMRT1C	0.0079249	0.0753384	0.120168	0.901978	0.983079	0.147361	0.0365561	0.0379319
DMSAT6	0.00259241	0.309731	0.395881	0.405383	0.983079	0.0894405	0.206079	0.21044
DMTOM1_LTR	0.00641766	0.109651	0.167958	0.364468	0.983079	0.199858	0.00438513	0.0047281
DNAREP1_DM	0.00247842	0.320625	0.404448	0.296482	0.983079	0.31794	4.07489e-06	4.68128e-06
DOC	0.0291359	0.000607244	0.00148352	0.804694	0.983079	0.837721	0	0
DOC2_DM	0.00163393	0.420106	0.503605	0.829211	0.983079	0.737098	0	0
DOC3_DM	0.00469143	0.171563	0.241691	0.360376	0.983079	0.627863	0	0
DOC4_DM	0.00652361	0.106754	0.16492	0.774534	0.983079	0.885359	0	0
DOC5_DM	0.00226184	0.342755	0.426785	0.217427	0.983079	0.180428	0.0102557	0.0108755
DOC6_DM	0.00354448	0.234818	0.305175	0.625509	0.983079	0.96178	0	0
FB4_DM	0.0103272	0.0422189	0.0727521	0.710025	0.983079	0.537623	1.11022e-16	1.68719e-16
FROGGER_I	0.0074837	0.0839893	0.132868	0.0353462	0.754256	0.801601	0	0
FROGGER_LTR	0.00434419	0.188337	0.261504	0.732183	0.983079	0.0742749	0.29402	0.298662
FW	0.000130076	0.820116	0.874489	0.703173	0.983079	0.786931	0	0
FW2_DM	0.00609788	0.118932	0.177937	0.0267122	0.747416	0.450937	1.6835e-11	2.21031e-11
FW3_DM	0.00578653	0.128806	0.186915	0.578695	0.983079	0.521384	1.77636e-15	2.59725e-15
G2_DM	0.000298145	0.730634	0.801203	0.626711	0.983079	0.503706	2.20934e-14	3.20604e-14
G3_DM	0.0248564	0.0015609	0.00358635	0.617413	0.983079	0.489483	1.47993e-13	2.10019e-13
G4_DM	0.000754262	0.583925	0.666849	0.721437	0.983079	0.712976	0	0
G5A_DM	0.0172349	0.00856863	0.0172265	0.479125	0.983079	0.623514	0	0
G5_DM	0.0144605	0.0161172	0.0302003	0.567823	0.983079	0.641683	0	0
G6_DM	0.00519909	0.150022	0.214475	0.141393	0.983079	0.616231	0	0
G7_DM	0.0118874	0.0292376	0.0517692	0.891126	0.983079	0.0642671	0.364077	0.367889
G_DM	0.00353266	0.235601	0.305175	0.846633	0.983079	0.348899	3.67e-07	4.31896e-07
GTWIN_I	0.286215	5.37774e-31	9.4355e-30	0.49822	0.983079	0.966398	0	0
GTWIN_LTR	0.188457	8.1756e-20	7.88946e-19	0.57064	0.983079	0.826725	0	0
GYPSY10_I	0.0519146	4.1568e-06	1.23425e-05	0.358561	0.983079	0.862681	0	0
GYPSY10_LTR	0.0142781	0.0168066	0.0311891	0.392	0.983079	0.56685	0	0
GYPSY11_I	0.0703618	7.23119e-08	2.63325e-07	0.452203	0.983079	0.690813	0	0
GYPSY11_LTR	1.22738e-05	0.944314	0.944314	0.370018	0.983079	0.311055	6.71955e-06	7.67381e-06
GYPSY12A_LTR	0.000164763	0.798007	0.865255	0.450918	0.983079	0.591961	0	0
GYPSY12_I	0.00364352	0.228376	0.301895	0.490678	0.983079	0.700533	0	0
GYPSY12_LTR	0.0413104	4.22002e-05	0.00011157	0.280254	0.983079	0.823306	0	0
Gypsy1-I_DM	0.24506	4.0587e-26	5.59521e-25	0.0470908	0.754256	0.976412	0	0
Gypsy1-LTR_DM	0.063747	3.10493e-07	1.05132e-06	0.303068	0.983079	0.83277	0	0
GYPSY2_I	0.0161019	0.011079	0.0209633	0.378513	0.983079	0.644645	0	0
Gypsy2-I_DM	0.090743	7.78372e-10	3.19629e-09	0.285245	0.983079	0.978789	0	0
GYPSY2_LTR	0.00580996	0.128033	0.186915	0.159902	0.983079	0.357227	1.83481e-07	2.1725e-07
Gypsy2-LTR_DM	0.00889508	0.0594874	0.0981288	0.675368	0.983079	0.821444	0	0
GYPSY3_I	0.0205686	0.00404988	0.00849594	0.157098	0.983079	0.698095	0	0
GYPSY3_LTR	0.00581391	0.127903	0.186915	0.258238	0.983079	0.364731	9.65614e-08	1.15039e-07
GYPSY4_I	0.0201546	0.00444288	0.00922018	0.918705	0.983079	0.79731	0	0
GYPSY4_LTR	0.011327	0.0333409	0.0584981	0.966309	0.986656	0.549008	0	0
GYPSY5_I	0.153385	4.09726e-16	3.04143e-15	0.603221	0.983079	0.895933	0	0
GYPSY5_LTR	0.252711	5.26578e-27	7.81766e-26	0.394943	0.983079	0.430285	1.68353e-10	2.10988e-10
GYPSY6A_LTR	0.000866029	0.557303	0.64379	0.846228	0.983079	0.449048	2.09177e-11	2.72778e-11
GYPSY6_I	0.0685922	1.06846e-07	3.81875e-07	0.511332	0.983079	0.84954	0	0
GYPSY6_LTR	0.0328645	0.000267797	0.000671232	0.0572435	0.75666	0.895495	0	0
GYPSY7_I	0.00214213	0.355871	0.43851	0.805537	0.983079	0.932969	0	0
GYPSY7_LTR	0.00405942	0.203524	0.277735	0.700257	0.983079	0.796108	0	0
GYPSY8_I	0.0171341	0.00876626	0.0174421	0.978041	0.988282	0.332704	1.33594e-06	1.54393e-06
GYPSY8_LTR	0.000109997	0.834364	0.884792	0.644938	0.983079	0.473192	1.17661e-12	1.5992e-12
GYPSY9_I	0.0592019	8.42431e-07	2.6654e-06	0.599668	0.983079	0.745632	0	0
GYPSY9_LTR	8.80599e-05	0.851584	0.891688	0.342607	0.983079	0.376932	3.2816e-08	3.95844e-08
GYPSY_I	0.190946	4.40818e-20	4.47778e-19	0.174897	0.983079	0.9615	0	0
GYPSY_LTR	0.287207	4.07142e-31	7.85785e-30	0.942768	0.983079	0.872901	0	0
HELENA_RT	0.0571461	1.3222e-06	4.05055e-06	0.493964	0.983079	0.859241	0	0
HELITRON1_DM	0.000142711	0.811738	0.870364	0.675756	0.983079	0.132925	0.0595789	0.0614905
HETA	0.469223	1.05284e-56	6.77328e-55	0.453644	0.983079	0.80251	0	0
HETRP_DM	0.196533	1.09482e-20	1.17389e-19	0.257096	0.983079	0.898736	0	0
HMSBEAGLE_I	0.0819428	5.55435e-09	2.18773e-08	0.0705693	0.75666	0.972181	0	0
HOBO	0.354844	8.8726e-40	2.4463e-38	0.369016	0.983079	0.924698	0	0
IDEFIX_I	0.0233423	0.0021834	0.00484364	0.118328	0.983079	0.901042	0	0
IDEFIX_LTR	0.0392529	6.61613e-05	0.000170255	0.0210686	0.747416	0.596865	0	0
I_DM	0.0185823	0.00632268	0.0129817	0.532746	0.983079	0.246505	0.000410192	0.000454983
INVADER1_I	0.0109442	0.0364846	0.0634371	0.827882	0.983079	0.932741	0	0
INVADER1_LTR	0.000878035	0.554582	0.64379	0.852149	0.983079	0.657966	0	0
INVADER2_I	2.8412e-05	0.915366	0.924951	0.759909	0.983079	0.403978	2.54608e-09	3.11008e-09
INVADER2_LTR	0.00818518	0.0706867	0.113981	0.282001	0.983079	0.273894	8.11153e-05	9.15511e-05
INVADER3_I	0.0949616	3.01918e-10	1.26674e-09	0.0859287	0.829212	0.84892	0	0
INVADER3_LTR	0.0796462	9.25543e-09	3.57259e-08	0.912508	0.983079	0.536641	2.22045e-16	3.32206e-16
INVADER4_I	0.0169521	0.00913498	0.0178086	0.0251481	0.747416	0.945494	0	0
INVADER4_LTR	0.00213463	0.356715	0.43851	0.0163504	0.747416	0.842618	0	0
INVADER5_I	0.114476	3.60774e-12	1.78537e-11	0.351053	0.983079	0.225454	0.00126779	0.00138239
INVADER5_LTR	0.00990829	0.0466438	0.0789671	0.0271084	0.747416	7.41658e-14	0.999999	0.999999
INVADER6_I	0.130242	9.49894e-14	5.55544e-13	0.692588	0.983079	0.922107	0	0
INVADER6_LTR	0.0219437	0.00297984	0.0064619	0.692274	0.983079	0.836407	0	0
IVK_DM	0.0323898	0.000297173	0.000735314	0.0691534	0.75666	0.751206	0	0
Jockey	0.118721	1.36237e-12	7.30382e-12	0.997968	0.997968	0.933465	0	0
JOCKEY2	0.0126226	0.0246342	0.0444336	0.488808	0.983079	0.440857	5.2813e-11	6.75027e-11
LOOPER1_DM	0.000461609	0.668355	0.750447	0.140119	0.983079	0.457884	7.48901e-12	1.00374e-11
LTRMDG3_DM	0.463273	9.73681e-56	4.69801e-54	0.841212	0.983079	0.923763	0	0
M4DM	0.0597861	7.41094e-07	2.38385e-06	0.448278	0.983079	0.903623	0	0
MARINER2_DM	0.00817463	0.070869	0.113981	0.0454167	0.754256	0.568028	0	0
MAX_I	0.0623274	4.24176e-07	1.38756e-06	0.918789	0.983079	0.968126	0	0
MAX_LTR	0.0883702	1.32403e-09	5.3237e-09	0.518678	0.983079	0.806477	0	0
MDG1_I	0.05291	3.34334e-06	1.00823e-05	0.175089	0.983079	0.964254	0	0
MDG1_LTR	0.132136	6.1125e-14	3.93237e-13	0.487782	0.983079	0.912443	0	0
MDG3_DM	0.36471	4.07717e-41	1.31149e-39	0.88924	0.983079	0.972986	0	0
MICROPIA_I	0.0254956	0.00135508	0.0032459	0.704475	0.983079	0.956524	0	0
MICROPIA_LTR	0.0011624	0.496541	0.584344	0.986459	0.991597	0.936242	0	0
NOMAD_I	0.0493561	7.27362e-06	2.06442e-05	0.877941	0.983079	0.920729	0	0
NOMAD_LTR	0.0639794	2.9502e-07	1.01676e-06	0.93459	0.983079	0.838068	0	0
PLACW_DM	4.02455e-05	0.89935	0.918384	0.0844086	0.829212	0.407327	1.82509e-09	2.24358e-09
POGO	0.116565	2.23544e-12	1.16605e-11	0.157397	0.983079	0.948316	0	0
POGON1	0.0512297	4.82863e-06	1.39093e-05	0.922458	0.983079	0.820867	0	0
PROTOP,PROTOP_A,PROTOP_B	3.56542e-05	0.905236	0.919529	0.528561	0.983079	0.579141	0	0
QUASIMODO2-I_DM	0.0453103	1.76101e-05	4.85536e-05	0.754263	0.983079	0.474268	1.02951e-12	1.40919e-12
QUASIMODO2-LTR_DM	0.0254716	0.00136227	0.0032459	0.814364	0.983079	0.276901	6.71585e-05	7.62447e-05
QUASIMODO_I	0.0217137	0.00313651	0.00672607	0.429279	0.983079	0.455249	1.02048e-11	1.349e-11
QUASIMODO_LTR	0.0706224	6.82691e-08	2.53384e-07	0.915683	0.983079	0.497056	5.42899e-14	7.81937e-14
R1-2_DM	6.59858e-05	0.871339	0.904132	0.747593	0.983079	0.262669	0.00016101	0.000179624
R1_DM	8.93636e-05	0.850503	0.891688	0.83085	0.983079	0.843072	0	0
R2_DM	0.033818	0.000217296	0.000551817	0.970749	0.986656	0.967248	0	0
ROOA_I	5.46661e-05	0.882807	0.906286	0.455963	0.983079	0.609211	0	0
ROOA_LTR	0.0455854	1.65827e-05	4.63834e-05	0.200909	0.983079	0.533622	3.33067e-16	4.94476e-16
ROO_I	0.00401201	0.206189	0.278283	0.971319	0.986656	0.823961	0	0
ROO_LTR	0.0393687	6.45071e-05	0.000168242	0.694728	0.983079	0.802735	0	0
ROVER_DM	0.0033228	0.250052	0.321733	0.915849	0.983079	0.733046	0	0
RSP	0.15404	3.50522e-16	2.70603e-15	0.591436	0.983079	0.177117	0.0117622	0.0124049
S2_DM	0.000434941	0.677524	0.75585	0.648771	0.983079	0.524505	1.11022e-15	1.63567e-15
SAR2_DM	0.0226734	0.0025332	0.00555577	0.604327	0.983079	0.487537	1.90625e-13	2.68545e-13
SAR_DM	0.00652139	0.106813	0.16492	0.547814	0.983079	0.231468	0.000927762	0.00101738
S_DM	0.0769162	1.6964e-08	6.41971e-08	0.363653	0.983079	0.888146	0	0
STALKER2_I	0.0674051	1.388e-07	4.8706e-07	0.216251	0.983079	0.939168	0	0
STALKER2_LTR	0.215319	9.44624e-23	1.13945e-21	0.58836	0.983079	0.879551	0	0
STALKER3_LTR	0.0138061	0.0187341	0.0344351	0.913502	0.983079	0.195934	0.00523874	0.0056171
STALKER4_I	5.92704e-05	0.878008	0.906179	0.293244	0.983079	0.675408	0	0
STALKER4_LTR	0.00670217	0.102058	0.16014	0.547632	0.983079	0.420907	4.55481e-10	5.63511e-10
TABOR_I	0.114522	3.56931e-12	1.78537e-11	0.557866	0.983079	0.906871	0	0
TABOR_LTR	0.130551	8.84091e-14	5.33217e-13	0.583031	0.983079	0.755966	0	0
TAHRE	0.627282	2.5527e-87	4.92671e-85	0.732804	0.983079	0.736146	0	0
TART-A	0.451022	8.80617e-54	3.39918e-52	0.859705	0.983079	0.901996	0	0
TART_B1	0.601443	1.61822e-81	1.56158e-79	0.947423	0.983079	0.893536	0	0
TC1-2_DM	0.00404475	0.204344	0.277735	0.492741	0.983079	0.44392	3.74614e-11	4.82003e-11
TC1_DM	8.43294e-05	0.854726	0.891688	0.756467	0.983079	0.483904	3.04645e-13	4.22997e-13
TIRANT_I	0.168404	1.1114e-17	9.32608e-17	0.0609435	0.75666	0.950293	0	0
TIRANT_LTR	0.102028	6.13206e-11	2.88656e-10	0.637747	0.983079	0.934257	0	0
TLD1	1.52419e-05	0.937957	0.942842	0.622973	0.983079	0.00810052	0.90902	0.913755
TLD2	0.0101232	0.0443163	0.0756906	0.0694217	0.75666	0.100957	0.153277	0.157354
Transib1	0.00385934	0.215057	0.286248	0.482487	0.983079	0.719659	0	0
TRANSIB2	0.000852508	0.560397	0.64379	0.943105	0.983079	0.595515	0	0
TRANSIB3	0.00459789	0.175906	0.246013	0.0508048	0.754256	0.662715	0	0
Transib4	0.00238784	0.329643	0.413124	0.661345	0.983079	0.486539	2.16938e-13	3.03398e-13
Transib5	0.0211496	0.00355703	0.00754402	0.790959	0.983079	0.715709	0	0
Transib-N1_DM	0.00388703	0.213415	0.286035	0.446674	0.983079	0.386639	1.34623e-08	1.6341e-08
TRANSPAC_I	0.0239383	0.00191294	0.00429299	0.391552	0.983079	0.916236	0	0
TRANSPAC_LTR	0.12917	1.2186e-13	6.91736e-13	0.52378	0.983079	0.855924	0	0
XDMR	0.00983871	0.0474246	0.0795908	0.288815	0.983079	0.440302	5.61837e-11	7.13385e-11
ZAM_I	0.14149	6.84364e-15	4.89194e-14	0.448053	0.983079	0.164447	0.0194732	0.0204257
ZAM_LTR	0.182693	3.39435e-19	2.9937e-18	0.829527	0.983079	0.777866	0	0

## Sheet: Table SF
RepBase Sequence ID	100_F_mean	101_F_mean	105_F_mean	109_F_mean	129_F_mean	136_F_mean	138_F_mean	142_F_mean	149_F_mean	153_F_mean	158_F_mean	161_F_mean	176_F_mean	177_F_mean	181_F_mean	189_F_mean	195_F_mean	208_F_mean	217_F_mean	21_F_mean	223_F_mean	227_F_mean	228_F_mean	229_F_mean	233_F_mean	235_F_mean	237_F_mean	239_F_mean	256_F_mean	26_F_mean	280_F_mean	287_F_mean	28_F_mean	301_F_mean	303_F_mean	304_F_mean	306_F_mean	309_F_mean	310_F_mean	313_F_mean	315_F_mean	317_F_mean	318_F_mean	319_F_mean	31_F_mean	320_F_mean	321_F_mean	324_F_mean	325_F_mean
ACCORD2_I	4.78974	4.81459	4.63484	4.70306	4.23748	4.87755	4.8348	4.79674	5.19344	4.64033	4.65292	4.70027	4.60119	4.41116	4.89749	4.61524	4.76144	4.7255	4.77668	4.58238	4.74436	4.4934	4.65198	4.7062	4.67657	4.82347	5.03488	4.7146	4.62955	4.64738	4.70842	4.45915	4.95605	4.68971	4.9134	4.63275	4.80293	4.65472	4.50535	4.47165	4.72344	4.57897	4.4839	4.49067	4.98194	4.24824	4.79848	4.81083	4.49801
ACCORD_I	6.13441	5.45388	5.85152	6.10458	6.20444	5.80977	5.88465	5.50053	6.22635	5.98012	5.99717	5.14743	4.82266	5.75154	5.10171	5.94851	5.2475	6.70597	5.43066	5.68922	6.13611	6.32574	5.38653	6.16905	4.83669	3.54233	5.28642	5.83723	5.11688	5.82513	6.23259	6.12863	5.56176	5.58647	6.87932	6.97769	5.96657	6.16297	5.65568	4.7052	5.43984	5.66931	6.10263	5.01726	4.93739	5.06205	5.90692	5.76045	4.7812
ACCORD_LTR	1.85017	1.43151	1.69371	2.43312	2.10886	1.26935	1.84567	1.54416	1.84276	1.54737	1.69545	0.996951	1.32743	2.43327	1.31566	2.2388	1.80069	2.81678	1.48503	2.08723	2.14248	2.24098	1.52766	2.02868	1.43128	0.854168	1.14347	1.39774	1.26049	1.98954	2.14878	2.07301	1.24982	1.6789	2.90629	3.41545	1.61211	1.70019	1.92708	1.36989	2.12005	1.49415	2.00206	2.1872	2.01554	1.53716	2.20926	1.32829	1.26659
BAGGINS1	6.22079	6.16632	6.14395	6.25407	6.25082	6.15975	6.35108	6.22167	6.27293	6.44131	6.21144	6.45298	6.20329	6.15051	6.33462	6.04645	6.32907	6.24542	6.26836	6.23898	6.21484	6.10401	6.27879	6.27545	6.28148	6.30728	6.17232	6.24278	6.14114	6.22669	6.12715	6.42554	6.15592	6.10647	6.28514	6.56479	6.38166	6.21541	6.3147	6.26379	6.39159	6.25238	6.1927	6.30095	6.27529	6.20335	6.30414	6.0738	6.17237
BARI_DM	4.21992	3.63656	4.24639	3.85765	5.68377	4.05027	4.42976	4.97057	3.71856	6.25758	5.77782	4.07267	4.02111	4.83165	3.58578	3.82007	4.14091	3.80794	5.9812	4.94441	3.69364	3.98973	5.8662	3.84154	4.40204	3.70128	4.35315	4.03578	4.04447	4.68319	4.7161	4.36448	3.86449	3.57098	3.75891	3.50406	3.33654	3.82872	7.29557	4.11141	4.20141	4.5816	4.00953	5.60899	4.00094	3.85588	3.75473	4.3706	4.15516
BATUMI_I	6.32066	6.33949	6.25856	6.58343	6.24969	6.16002	6.11615	6.46329	6.46332	6.648	6.31517	6.59854	6.69853	6.40506	6.77671	6.20711	6.40611	6.33534	6.38564	6.29667	6.24425	6.21945	6.20606	6.23355	6.45866	6.63189	6.08262	6.64105	6.0639	6.50637	6.28046	6.38452	6.11584	6.1158	6.09553	6.11282	6.31494	6.16529	6.47664	6.40882	6.82635	6.28796	6.10836	6.46963	6.54924	6.36234	6.2175	6.07256	6.1067
BATUMI_LTR	2.23472	2.2374	2.61767	2.4701	2.18328	2.01803	2.61146	2.43612	2.42291	2.99326	2.63933	2.48523	2.4019	2.91817	2.31439	2.46672	1.81881	2.31421	2.58891	2.35283	2.14673	2.10828	2.20546	1.98594	1.80143	2.49962	2.42657	2.17738	1.81561	1.90757	2.38113	1.70671	2.23209	2.29125	1.78518	1.47573	2.34493	2.67606	2.93587	1.64212	3.32427	2.01517	2.28391	2.38453	2.22909	2.44829	2.17568	2.27122	2.17193
BEL_I	5.49843	6.53852	5.35285	6.24461	5.64971	5.50381	6.53667	5.77714	5.24245	6.63709	6.14854	4.15569	7.83533	7.23615	6.82338	4.92812	6.39744	6.20684	4.51288	6.78798	6.72011	5.64266	5.02655	6.58238	4.46019	5.98563	6.7741	6.2169	6.32664	4.80522	5.9066	6.01806	6.45764	6.63305	5.92289	4.84846	4.73176	5.66298	6.17924	5.31825	6.36023	5.61016	5.88611	7.75267	4.86214	7.41331	5.30798	6.56904	6.46749
BEL_LTR	1.3887	2.39691	1.81928	1.91826	2.06123	1.50211	2.25671	2.28261	1.09751	2.19596	1.31243	1.08977	2.68001	2.21669	1.5672	2.17529	2.14321	1.30448	1.77846	2.85842	1.61984	1.55738	0.772079	1.17709	1.08285	1.39958	1.7884	1.63892	1.93071	1.24686	1.18212	1.45257	1.84919	2.68691	1.08106	1.14632	0.516004	1.37767	1.62411	0.977362	1.98545	2.08246	2.30447	2.45852	1.43276	2.25675	1.43723	2.23501	1.89635
Bica_I	4.18634	4.50043	3.8484	4.12579	4.39559	4.00498	3.85652	4.21464	3.78883	3.86778	3.90496	4.9439	4.4885	4.8388	4.47713	3.81688	3.96602	3.39007	4.49682	4.6382	4.12503	3.74352	4.57053	3.97329	4.28568	4.43613	4.16985	4.73581	3.7675	4.7172	4.30593	4.38345	4.53491	4.03162	3.96037	4.09389	4.55929	3.80286	4.1372	4.30407	4.20456	3.91709	3.61906	3.66965	4.23101	3.54311	4.08003	4.10309	3.40684
Bica_LTR	0.151641	0.200987	0.0649409	0.127213	0.269992	0.125557	0.202449	0.447271	0.120458	0.167397	0.321974	0.44379	0.208324	0.180433	0.223442	0.037971	0.290624	0.122069	0.387793	0.362549	0.203933	-0.169858	0.267503	0.316967	0.00237479	0.242676	0.133631	0.426176	-0.0131758	0.442457	0.225889	0.353862	0.315681	0.135333	0.0986652	-0.0955684	-0.100494	0.0245878	0.268452	0.212805	-0.0226256	0.220007	-0.0161842	-0.213631	-0.00177801	0.0659788	-0.00538587	0.245276	0.131764
BLASTOPIA_I	7.01592	5.60704	9.47408	6.07089	6.31374	7.41578	6.63543	9.54226	5.35667	8.00011	5.32522	6.83685	7.44627	8.10119	8.15065	7.76797	5.50804	7.59352	6.10931	6.1067	6.38222	8.29021	7.45357	6.21874	6.09371	6.91861	5.62898	5.96043	6.15544	6.2677	8.4866	6.84117	6.97059	7.79886	7.13208	6.8432	7.08539	8.96351	7.2037	6.02821	6.64501	5.74221	6.98718	6.39866	6.34328	6.25372	5.51524	7.03312	6.60118
BLASTOPIA_LTR	3.57024	2.30224	5.58776	2.62884	3.13938	3.84302	2.93137	5.1557	2.2753	3.3072	1.29509	3.11641	4.008	3.43624	5.08673	3.89175	1.80344	4.44782	2.69847	2.8933	2.5408	4.46742	4.17547	3.35713	2.71848	3.12496	1.98437	2.32995	3.36311	2.31424	4.8485	3.86752	3.03644	3.81307	4.63502	3.29112	3.70281	4.69424	3.46148	3.72673	3.61347	1.85243	3.19	2.63112	3.99001	2.99184	2.55024	3.40968	2.27889
BLOOD_I	8.07368	7.86229	7.63349	7.11861	6.22552	8.13477	7.61696	6.9287	7.04538	6.48344	7.57465	6.2324	8.03699	8.22412	7.26052	6.84509	7.08875	7.17007	6.96772	7.47699	6.12983	7.99966	8.27103	7.42253	7.55716	7.73795	7.76357	8.79347	9.82561	7.65057	6.54066	7.04402	7.42803	8.03514	6.85909	8.00913	7.02752	7.28419	8.20553	8.47705	8.47509	8.31549	9.70158	7.14874	7.33469	8.09917	7.16286	8.62056	7.81413
BLOOD_LTR	3.69057	3.67337	2.8733	3.22862	2.34524	3.47244	4.59015	3.2484	2.81816	3.04348	3.95472	2.13261	3.39993	4.42443	3.77314	3.23053	2.78282	3.14475	2.5084	3.86829	3.00281	3.41797	3.71742	3.23252	2.93951	4.32562	3.35118	3.73925	6.24232	3.27481	2.73234	3.07038	3.66441	3.88337	3.26636	3.72647	3.4463	3.63215	3.3057	3.86517	4.41548	3.47273	4.53397	3.66414	3.69893	3.82851	3.24855	4.34469	3.56082
BS	5.50915	4.83913	5.26627	5.06888	4.76807	5.03854	5.58919	4.6436	4.17114	6.97701	5.3413	4.28686	7.76483	5.77535	4.81442	5.25284	6.05559	5.47979	6.43643	4.96005	5.52968	4.29724	4.81365	5.31684	5.33087	6.23382	5.06807	4.90472	4.43504	4.896	8.11198	5.28008	6.63943	5.7296	5.41911	5.25194	5.09233	5.02418	4.48237	5.87168	6.77657	4.25031	5.86256	5.49299	5.9156	5.78765	7.03316	6.43415	5.19676
BS2	5.42019	5.44086	5.44097	5.4505	5.41613	5.34334	5.27499	5.38552	5.45616	5.42313	5.31542	5.48694	5.49109	5.3893	5.26104	5.4319	5.56955	5.1684	5.44805	5.61008	5.37923	5.30369	5.36281	5.51047	5.5338	5.5425	5.28538	5.22223	5.38919	5.1414	5.40856	5.46171	5.20567	5.42511	5.10524	5.55426	5.41353	5.40794	5.47325	5.16724	5.21637	5.42882	5.49691	5.52651	5.25458	5.52025	5.45212	5.43509	5.38505
BS3_DM	3.79511	3.69684	3.66622	3.70712	3.83331	3.85686	4.00057	3.67397	3.71828	3.75307	3.79092	3.71102	3.58682	3.79626	3.67914	3.86575	3.80227	3.55383	3.69715	3.84569	3.70998	3.42612	3.7473	3.5729	3.76695	3.90613	3.82593	3.55103	3.64795	3.66778	3.77193	3.71786	3.62462	3.81357	3.66207	3.96012	3.87427	4.04324	3.60017	3.80616	3.77918	3.75726	3.73252	3.72527	3.76231	3.69954	3.67698	3.80829	3.53444
BURDOCK_I	6.03059	8.10519	7.85448	7.58318	7.71794	8.26626	7.21538	7.55759	8.17598	6.93025	7.49067	7.94409	8.11814	7.40281	7.36419	6.02912	7.29896	7.93175	7.90302	7.51039	7.65971	8.32106	7.34514	7.69537	6.86898	7.46505	8.4462	6.90268	7.26597	7.78622	7.89431	6.48557	8.86877	7.68884	7.50206	7.48273	6.41144	6.53684	7.72814	6.37572	7.35584	8.22331	6.16476	7.33395	7.07678	6.00551	6.35514	7.82031	8.72466
BURDOCK_LTR	2.52384	4.52175	3.97278	3.68397	3.87608	4.3823	3.83916	3.65276	4.33401	3.30704	3.55873	4.48578	4.48118	3.35038	3.28069	2.57828	3.96012	3.79792	3.97098	3.6395	3.50093	4.22864	3.36546	3.51563	3.31973	3.83327	4.40836	3.64716	3.73106	4.22322	4.46102	3.45099	4.73045	4.17881	3.27726	4.02001	2.41355	2.91571	4.20623	2.90122	3.50656	4.25661	2.63794	3.64384	3.07206	2.85713	2.86905	4.28987	3.69191
Chimpo_I	3.62047	3.68636	3.38086	3.92753	3.29052	3.88051	4.07467	3.78212	3.70634	4.03765	3.38606	3.60641	3.8095	3.3941	3.84197	3.66922	3.70213	3.56104	3.64573	3.46131	4.03667	3.48181	3.69879	3.79844	3.83163	3.9473	3.47961	3.42122	3.46587	3.67378	4.07417	3.76413	3.66689	3.88649	3.87047	4.25268	3.85352	3.55101	3.46324	3.92679	3.67003	3.44945	3.39359	3.57478	3.79443	3.68668	3.40516	3.62531	3.50845
Chimpo_LTR	0.0913523	0.21303	-0.081136	0.0815196	-0.0875094	0.280995	0.0947235	-0.116052	0.209309	0.100623	0.0805497	0.0796078	0.106215	0.106939	0.0913043	-0.0412579	0.0283421	0.00690924	0.068633	-0.274505	-0.0882439	-0.084532	0.104542	0.176072	0.34577	0.190814	0.151695	0.0306113	0.0703578	-0.0503943	0.217859	-0.00217661	-0.297225	0.120348	-0.0933451	0.157387	0.114201	-0.0677747	0.0178274	0.0492353	0.112109	0.108388	0.00813381	-0.0284667	-0.0617453	0.203807	-0.0223937	-0.0266248	0.0269271
Chouto_I	3.99828	3.95724	4.21226	4.04464	5.19035	3.63831	4.45461	4.23424	4.19999	4.37214	3.61692	4.62547	4.01542	4.55135	4.09674	4.05102	3.6733	3.81998	4.6272	4.03887	4.27473	3.82447	3.95034	4.73242	4.4996	5.0091	4.1937	4.0213	4.0271	3.74734	4.12639	3.94704	3.94475	3.71543	3.95307	4.16022	4.1386	3.78204	3.74582	3.7129	3.82315	3.74182	3.63166	4.14223	4.2708	4.1217	3.78302	3.81345	3.78941
Chouto_LTR	2.01604	1.89418	2.07969	1.93053	2.26939	1.65238	2.04794	2.09151	1.9703	1.79557	1.8441	2.08255	1.80482	2.26804	1.91571	1.95649	1.88904	1.73013	1.98231	1.90522	2.00067	1.74984	1.7802	2.12127	2.13304	2.37264	1.80108	1.93365	1.72737	1.68878	2.03249	2.02149	1.9815	1.77802	1.8665	1.89981	1.86204	1.70103	1.81873	1.53446	2.05638	1.6123	1.46026	1.72592	1.76643	1.91283	2.0782	1.57288	1.57446
CIRCE	5.20219	4.98971	5.47291	4.85997	4.98263	5.05629	5.19606	5.57122	5.0591	5.23545	5.02839	4.8537	5.04945	4.84356	5.1343	5.47944	4.93834	5.08242	4.88757	4.6051	4.82762	4.8868	5.0277	5.15781	5.11729	4.94238	5.06395	5.1888	4.99084	4.88096	4.81069	5.00779	4.88308	4.97005	4.8421	4.7035	5.08107	4.58607	5.10598	4.75352	4.49986	4.94026	5.19104	4.98945	4.99357	5.17071	5.04041	5.19261	5.65382
Copia1-I_DM	4.76853	5.02924	5.0015	4.85851	5.29325	4.96502	4.56242	4.96814	4.75206	4.96122	5.42773	5.30541	5.14812	5.35874	4.90098	5.14795	4.89435	4.70109	5.19283	5.61709	5.00608	4.79146	4.9995	5.42719	5.08197	5.09509	5.06477	5.12297	5.16764	5.22272	5.78206	4.36246	4.97083	4.91003	5.0068	5.31644	5.40728	4.70955	4.81383	5.34388	4.85624	5.03051	4.34887	4.91618	4.68991	4.34865	5.08837	5.13686	4.83684
Copia1-LTR_DM	2.35485	2.55482	2.62966	2.80765	2.71824	2.52917	2.89207	2.28423	2.47369	2.77162	2.67976	2.60334	2.10655	3.14898	2.77935	2.60618	2.7751	2.19674	2.53843	2.34512	2.44338	2.40938	2.59291	3.07243	2.71588	2.59281	2.8098	3.05516	3.08292	2.5594	2.53486	2.68231	2.83449	2.626	3.0948	3.06419	2.93239	2.41573	2.5624	2.42786	2.55118	2.56787	2.14545	2.47369	2.88617	2.45441	2.3613	2.72017	2.07101
COPIA2I_DM	4.40761	4.18886	4.58225	4.34598	4.33612	4.17409	4.35554	4.65151	4.27598	4.16022	4.39803	4.54872	4.2845	4.74168	4.52632	4.01015	4.25629	4.13356	4.59627	4.2023	4.08389	3.71492	4.15217	4.47654	3.8793	4.19917	3.95798	4.04484	3.89898	4.46749	3.97995	4.41839	4.26562	3.86846	4.39275	4.55055	4.13422	4.01863	4.46795	4.45793	3.95663	4.20836	4.50791	4.18328	4.24164	4.82222	4.36278	3.95863	4.00799
COPIA2LTR_DM	1.59298	1.49946	1.52126	1.54684	1.44646	1.67735	1.79479	1.38748	1.55479	1.49836	1.66098	1.61387	1.53411	1.1448	1.51657	0.919041	1.3606	1.52041	1.5147	1.26587	1.48495	1.32913	1.47059	1.56894	1.14139	1.37591	1.27845	1.26217	1.25878	1.64375	1.34351	1.61207	0.903379	1.32391	1.32483	1.56753	1.47696	1.60035	1.6367	1.44587	1.7123	1.41269	1.59872	1.54611	1.76422	1.86242	1.44375	1.23303	1.12624
COPIA_DM_I	12.5439	10.3671	11.2959	8.8434	13.1991	9.1756	10.4989	10.7091	10.8627	10.4702	12.4778	12.1013	12.8356	11.2119	13.2528	10.2887	12.4451	9.48319	10.2244	9.10087	8.8642	12.9959	11.995	11.3555	12.3139	9.84664	11.8165	11.8355	10.502	9.09838	8.80524	11.7628	11.1917	9.62176	9.46836	11.8466	7.1297	12.1863	10.6458	9.95239	11.7229	11.4182	10.4012	10.951	11.3973	11.4843	10.6918	9.41846	10.6126
COPIA_DM_LTR	-3.04236	-2.04677	-2.73695	-4.86549	-1.51031	-6.80552	-6.82926	-2.72244	-3.21825	-5.12477	-2.33177	-2.70468	-2.93538	-4.80203	-1.94232	-3.19687	-2.50007	-5.1034	-4.43297	-2.69888	-3.06599	-1.55239	-2.18785	-2.97357	-2.72165	-5.02479	-3.87033	-4.15803	-3.00667	-3.2056	-3.30471	-3.10045	-4.57152	-2.98799	-4.76799	-4.47146	-7.06366	-2.24973	-3.2055	-3.15191	-3.17185	-2.40742	-3.6326	-2.76264	-2.70398	-3.49918	-3.10696	-5.0141	-4.91804
DIVER2_I	4.67842	4.73349	4.65412	4.85206	4.61667	4.76236	4.57322	4.80321	4.68832	4.7427	4.69952	4.68899	4.66431	4.63511	4.73969	4.81355	4.78113	4.63233	4.74147	4.73079	4.6594	4.4897	4.65114	4.72169	4.7877	4.84605	4.69869	4.6833	4.70724	4.62032	4.75904	4.91711	4.62455	4.78212	4.75903	4.70583	4.76897	4.66999	4.68474	4.79171	4.74163	4.73879	4.6117	4.72378	4.79361	4.66906	4.7477	4.69984	4.66886
DIVER2_LTR	2.89414	2.8438	3.01418	3.01489	2.82211	2.9629	2.84389	2.96497	2.78107	2.75076	2.93014	2.87556	3.01985	2.908	2.91014	2.94677	2.75599	2.9424	2.76886	2.75682	2.8219	2.82756	2.80784	2.97205	2.96267	2.93039	2.70052	2.96611	2.71169	2.8483	3.0111	2.98265	2.73125	2.72746	2.94111	3.03633	2.89885	2.59092	3.01142	3.02328	3.0437	2.80623	2.84463	2.70918	2.98954	2.83599	2.87215	2.8912	3.13252
DIVER_I	4.27097	6.75851	5.99326	4.83485	7.55673	4.39778	7.15051	7.64064	6.22296	5.88705	6.98402	6.76881	6.16544	8.93795	7.15559	6.81223	4.38938	6.63416	6.90343	5.62416	8.23285	3.82188	7.06	5.9359	6.50814	6.59042	6.51468	5.3266	7.23856	6.76429	6.02735	7.39178	6.4873	5.55307	8.59495	6.91665	6.67249	6.18606	3.76108	6.08705	5.27626	6.67392	6.53123	7.58931	5.64801	6.25118	7.46599	4.04414	4.9051
DIVER_LTR	-2.11558	2.55857	1.93174	0.102365	2.7331	0.540355	2.57174	2.3654	1.95319	1.22525	2.56004	2.27756	1.9038	2.61195	2.2742	1.65171	0.421959	0.796486	2.96368	-0.0378156	2.36299	-1.13768	2.81006	1.15708	1.88038	0.502741	1.54746	3.07653	3.40757	2.83744	2.12279	2.43469	2.8489	0.408354	2.76644	1.33687	1.0387	1.36605	0.580237	1.2494	0.97816	2.18319	2.23932	1.79521	-0.0978844	1.08525	1.72697	0.251703	0.740772
DM1731_I	6.52911	4.53069	5.81336	4.05544	7.05143	5.53053	7.12926	7.14878	7.24542	5.03051	5.12536	4.6037	3.92049	6.35153	10.3281	3.95657	5.52502	4.67077	5.52026	7.40612	4.21256	5.62722	4.54152	6.73603	6.13212	5.96931	7.16348	5.90645	3.66429	4.6425	5.90958	3.80868	4.46835	4.12976	4.1164	6.2782	6.18899	6.48752	7.87414	4.33479	7.45257	6.05448	7.3436	6.6829	3.69163	6.17826	5.4508	4.30909	3.40555
DM1731_LTR	1.62589	0.59774	1.35443	0.426314	2.72927	1.77652	2.71503	3.51064	2.40061	1.23971	1.2031	1.67292	0.900238	2.19743	4.95139	1.16595	1.42537	1.79205	1.84748	2.25943	0.631857	1.64533	1.02109	1.92843	2.4214	1.94267	2.68412	1.51425	1.03203	1.39376	2.04723	0.635598	1.29771	0.301947	0.915736	2.09432	1.84772	1.93983	2.92808	0.808225	2.85657	1.82576	2.70292	2.07908	0.937127	1.60361	1.48166	1.22446	0.320139
DM176	6.44329	5.86963	5.8401	7.48363	5.97552	6.26719	6.61866	6.52066	5.89421	6.16226	6.65996	6.71445	7.69601	5.75975	5.70854	6.83948	5.61269	6.03827	6.82379	5.81622	5.84164	6.46649	6.13856	6.90895	6.01158	5.49914	5.65252	6.0569	5.93716	7.92903	6.2748	6.34707	6.5827	5.76607	5.9847	6.69683	5.92718	5.74387	5.9774	5.97787	5.82822	6.41592	6.10972	5.77648	6.13599	6.15923	6.31395	6.12618	5.96658
DM297_I	7.48893	7.92305	7.9351	7.7295	7.81181	6.31576	7.70604	7.5405	7.74128	7.53448	7.34086	7.8483	7.34139	7.26714	8.52506	8.35825	8.65578	7.32712	7.90268	6.66834	8.3273	7.39261	7.22604	9.17399	9.01836	7.31397	8.0163	6.67024	8.45382	6.66165	8.26796	9.43056	8.11715	6.77935	7.13647	7.46025	7.99258	7.31124	7.75151	6.32345	7.51414	7.62946	6.83485	7.18086	7.80488	8.64733	6.45289	7.96141	7.69234
DM297_LTR	4.06203	4.16271	4.60131	4.51936	4.31606	3.63174	4.21398	4.48934	4.35227	4.71205	4.41692	4.11309	4.03216	4.43941	4.19674	4.33401	3.97334	3.98077	4.58404	3.7641	4.58457	4.31778	3.93235	4.82005	4.6821	3.8426	4.9741	3.84773	4.69049	3.57769	4.67534	4.41627	5.20387	4.26375	3.72707	4.01306	3.84135	4.26491	4.43633	3.37619	3.94221	4.31038	3.64373	4.47213	4.29608	4.43149	3.78427	4.33958	4.25175
DM412B_LTR,DM412_LTR	5.01907	3.98517	4.49415	4.29746	4.57973	4.39725	4.52121	4.55688	4.69273	4.42109	4.67716	3.71547	4.06745	4.23218	4.27579	4.54231	4.95864	4.38348	4.54172	4.44422	4.66598	4.80885	4.45178	4.32128	4.06619	4.85416	4.26232	4.30113	4.31522	3.93486	4.45799	4.41808	4.90901	4.57111	4.95177	3.33072	3.88696	4.34939	4.10719	4.15026	4.66813	4.7954	4.62763	4.46157	3.97814	5.12841	4.90514	4.34974	4.05112
DM412_I	8.35304	6.8238	8.13514	7.30126	7.60768	7.2746	8.34565	7.42544	8.00168	7.58609	7.79844	7.55297	7.683	7.36101	7.68804	8.11898	7.99637	7.7389	7.57527	7.29155	7.38804	8.31499	7.59915	7.54626	7.08495	7.53759	7.95233	7.81278	8.25289	7.88946	8.4121	7.57135	8.58821	7.77569	7.58122	6.35447	6.97794	7.50314	7.75707	7.38298	8.18443	8.66282	9.05001	7.25952	7.0693	8.14151	7.32603	7.43441	7.94729
DMCR1A	7.87413	7.79795	7.90289	7.81137	7.83538	7.87604	7.8499	7.86098	7.88808	7.85695	7.85428	7.8638	7.90931	7.87681	7.80799	7.83311	7.79383	7.92835	7.94462	7.85529	7.83254	7.84855	7.84753	8.01671	7.8531	7.80881	7.83064	7.89433	7.8436	7.83028	7.81872	7.85627	7.80093	7.8662	7.86714	7.91979	7.87641	7.885	7.82512	7.87673	7.87432	7.8534	7.80841	7.82096	7.82403	7.82278	7.79628	7.85795	7.82974
DMHMR1	1.04104	1.37619	1.13028	1.33832	4.03787	1.98257	1.73059	6.83798	1.63629	1.75314	1.45216	1.64484	1.92372	1.4321	2.47976	1.63878	1.53715	5.61724	0.885633	1.48481	1.79422	1.62645	1.75591	1.14902	1.33692	1.45351	1.0806	1.62517	1.40759	2.86412	1.5092	1.23883	1.11819	1.29165	1.2977	1.40585	1.33227	1.11182	0.904149	1.75877	0.906391	1.42348	0.533786	1.32241	1.36384	1.56626	1.8951	4.61765	0.787052
DMHMR2	-0.0721722	-0.686322	-0.422844	-0.0520956	-0.202798	-0.108691	-0.44425	-0.14436	0.0117652	-0.0399412	-0.979041	0.889801	-0.597168	-0.0752525	-0.264141	-0.701679	0.24817	-0.685731	-0.264176	-0.11949	-0.229931	-0.554732	-0.222342	-0.147614	-0.392853	-0.169212	-0.740688	-0.511047	-0.296688	-0.236328	0.188006	-0.632266	-0.467272	0.24924	-0.418373	0.201868	0.0104017	-0.290172	-0.223132	-0.716381	-0.43525	-1.37874	-0.430428	-0.0745045	-0.0849236	0.158251	0.0872581	-0.209308	-1.21369
DMLTR5	4.54781	2.10007	1.09076	1.8292	1.66692	1.54661	0.908645	1.58626	1.05128	0.743142	1.10308	2.19875	2.82563	1.51307	2.59279	0.827706	2.00082	3.18147	1.38243	1.63897	2.36444	0.96641	0.967721	1.03672	1.66355	2.43959	0.868069	2.89943	1.86557	2.17613	2.33945	1.84823	1.82767	1.43686	2.06037	1.75775	2.47983	1.11419	0.609953	1.75687	1.6782	1.02949	3.47901	2.12141	1.85611	1.79447	2.02377	1.55775	1.37163
DMRP1	0.837363	0.858579	0.900643	0.784739	0.661435	0.794833	0.766582	0.702392	0.70304	0.90493	0.878205	0.834388	0.654944	1.02084	0.778916	0.973333	0.453779	0.830039	0.60183	0.652258	0.859892	0.723759	0.661951	0.869928	0.907706	0.779257	0.694598	0.941757	0.720528	0.742667	0.891569	0.513551	0.923161	0.620503	1.26038	0.750745	0.806073	0.68259	0.828446	0.711632	0.466242	0.636299	0.544674	0.672337	0.914875	0.65412	0.770425	0.990079	0.688509
DMRT1A	5.1015	5.21897	4.94634	5.26291	5.36745	5.17584	5.20663	5.06522	5.23377	5.38793	5.04705	5.02971	5.22824	4.97023	5.34713	5.19053	5.16416	4.82212	5.17085	4.87386	5.33485	4.7633	5.23761	5.37401	5.45295	5.33059	5.21333	5.41675	4.81051	4.88549	5.29356	5.2451	4.75185	4.96397	5.13915	5.26561	5.42307	4.77468	5.17092	5.32021	5.23722	4.88523	5.29297	5.48653	5.12745	5.4189	4.96846	4.64055	4.90339
DMRT1B	6.50296	7.21344	6.65755	6.59247	6.52381	6.70283	6.45795	6.40492	6.92032	7.08663	6.55975	7.81728	6.39509	6.5076	7.23194	5.91571	6.97129	6.47306	6.05355	6.1212	7.40407	6.77222	6.60896	6.1983	6.38479	7.97849	6.19511	6.20375	6.36834	6.30358	6.35682	6.98003	5.84411	7.48093	6.93326	6.22889	6.57117	6.76382	6.71514	7.65615	6.32472	7.43394	7.16188	6.5555	6.37123	6.98607	6.68406	7.11997	6.25616
DMRT1C	4.16167	4.13609	4.08814	4.28591	3.85372	4.24214	4.26987	4.1261	4.21619	4.38942	4.15092	3.99313	4.03676	4.0736	4.15421	4.13407	4.13872	4.12575	4.00124	3.91078	4.19317	3.96849	4.02456	4.14601	4.2171	4.16737	4.02623	3.86982	4.05639	4.223	4.23641	4.27655	4.02048	4.31818	4.06475	4.19803	4.11289	4.08798	4.08816	4.13772	4.16999	4.16305	4.16441	4.29513	4.27981	4.1032	4.11506	4.12577	4.01782
DMSAT6	1.98571	2.06003	2.15859	2.2136	2.61876	2.22471	2.01387	2.39031	2.08025	2.49882	2.3269	2.26067	2.02623	2.16603	1.89903	2.2889	2.53776	2.47687	1.94277	1.9351	2.20921	2.22457	1.99389	1.80738	1.96374	1.6533	2.11015	2.30661	1.92314	2.4307	2.17993	2.35359	2.23597	1.9916	2.05764	2.19255	2.18787	2.01805	2.08567	2.02495	2.1786	2.13259	2.20555	2.16839	2.20124	2.30707	1.78933	2.25066	2.27208
DMTOM1_LTR	3.80273	3.90143	3.87784	3.94108	3.65772	3.92096	3.8348	3.71112	3.74339	3.76765	3.92192	3.8619	3.97266	4.02482	3.69207	3.88966	3.7544	3.89117	3.69455	3.78693	3.85507	3.83413	3.7963	3.84753	3.78152	3.75876	3.82171	3.86047	3.71651	3.93095	3.87348	3.78145	3.97794	3.77065	3.90066	3.96229	3.68976	3.79638	3.74638	3.74855	3.72828	3.80932	3.8752	3.75978	3.7534	3.69186	3.82167	3.81911	3.68488
DNAREP1_DM	8.20676	8.16702	8.27365	8.27611	8.08445	8.32581	8.19447	8.09673	8.15109	8.22852	8.25575	8.11064	8.19069	8.37592	8.14969	8.28274	8.15826	8.29395	8.16631	8.19626	8.16543	8.13664	8.19772	8.31399	8.20094	8.18088	8.30502	8.29135	8.23668	8.16321	8.29062	8.17326	8.31369	8.23713	8.35331	8.28994	8.21044	8.27132	8.18321	8.19963	8.1565	8.22337	8.21818	8.20044	8.15982	8.24837	8.23294	8.28158	8.19172
DOC	7.0551	7.21385	6.73345	7.62067	7.38685	7.9733	6.93233	7.56158	7.59984	7.0994	7.11147	7.01901	7.11294	8.12761	7.08495	7.43506	7.49304	8.03583	7.67956	7.75459	7.82076	8.13512	6.70577	7.78124	9.07516	7.62811	7.43622	7.91552	7.8152	7.53491	7.5462	8.04732	7.01186	7.6978	7.0801	7.34529	7.65337	7.19337	7.68558	7.05906	7.87459	7.35837	7.30766	7.6505	7.3459	7.36018	7.61692	7.03062	7.55631
DOC2_DM	5.33055	5.47761	5.51573	5.48819	5.54272	5.52799	5.34389	5.95142	5.14681	5.68898	5.30954	5.65807	5.57125	5.50496	5.18815	5.70406	5.45912	5.36753	5.67045	5.48489	5.19166	5.53339	5.55286	5.80593	5.65885	5.45363	5.30187	5.40742	5.48174	5.76125	5.6846	5.44771	5.21382	5.41487	5.51769	5.55517	5.73436	5.25082	5.36479	5.47261	6.21163	5.58171	5.41957	5.31402	5.4383	5.24281	5.20998	5.48875	5.53397
DOC3_DM	7.04898	6.83215	6.82346	7.02484	6.74075	6.82807	6.89895	6.81067	6.86098	6.86691	6.94828	6.95514	7.01652	7.07493	6.73565	6.90753	6.77889	6.96195	6.85418	7.01658	6.95292	6.72144	6.94103	7.03661	6.72427	6.71113	6.88631	6.78836	6.89234	6.95856	6.81592	6.88495	7.04522	6.78341	6.76234	6.70629	7.03844	6.9922	6.89003	6.81025	6.86767	6.76611	6.79298	6.85573	7.13366	6.83598	6.99875	6.72208	6.89974
DOC4_DM	3.70349	3.60437	3.53526	3.68288	3.83481	3.42674	3.58517	3.57906	3.65349	3.52104	3.52884	3.69172	3.68606	3.75297	3.64959	3.85121	3.57248	3.63361	3.59295	3.74208	3.59979	3.70357	3.41793	3.56328	3.65977	3.67384	3.80225	3.51573	3.68309	3.65439	3.48469	3.72206	3.70819	3.56037	3.65795	3.51446	3.56688	3.81354	3.74224	3.57539	3.56191	3.47406	3.75936	3.56225	3.82692	3.61091	3.61018	3.56223	3.66623
DOC5_DM	4.37727	4.38764	4.61127	4.48011	4.50061	4.45729	4.67519	4.75411	4.66022	4.55409	4.53163	4.62793	4.71943	4.79252	4.79217	4.46258	4.24868	4.56556	4.5888	4.5091	4.37802	4.2837	4.47166	4.48943	4.57134	4.55954	4.47757	4.61398	4.45556	4.62346	4.55364	4.61659	4.57981	4.4538	4.55402	4.37028	4.6317	4.41697	4.6853	4.4213	4.49522	4.49381	4.64289	4.34593	4.59448	4.41126	4.42724	4.55353	4.66515
DOC6_DM	5.23133	4.96906	7.00163	4.98286	5.08827	6.68393	3.70961	4.29954	6.33037	5.8466	4.00559	6.42545	4.85945	6.06569	5.91728	5.5341	5.61324	4.45235	4.64998	3.19195	4.59189	5.65952	6.04523	4.35504	6.57268	4.6082	5.5523	5.38488	4.57621	6.58704	6.7321	6.16773	6.41816	6.16794	4.01675	3.54399	4.89204	5.3863	3.97522	6.63399	5.43919	5.49012	5.55705	5.1557	4.27062	5.11398	6.74965	7.30082	5.51419
FB4_DM	7.05176	6.74788	6.91971	6.75228	6.57854	7.12298	6.60635	6.797	6.66326	6.8017	6.95552	7.0382	6.86356	7.04895	6.65384	6.96459	6.6531	6.89581	6.71095	6.56383	6.91361	6.81122	6.76376	6.75619	6.68918	6.60814	6.75689	7.00645	6.84803	6.72125	6.82617	6.67075	7.09373	6.95938	6.92019	6.92703	6.80726	7.06202	6.78812	6.8733	6.61295	6.81051	6.71112	6.87625	6.9081	6.68341	6.88427	6.95189	6.77151
FROGGER_I	1.79765	2.71384	2.0922	2.85214	2.8608	2.41608	2.59405	2.5846	2.42252	3.12711	2.01543	3.40709	2.20902	2.68299	2.55075	2.93277	2.25947	2.70683	2.48397	2.87046	2.65521	2.91388	2.21615	2.70195	2.48514	2.33221	2.71999	2.61942	2.59578	2.60623	2.78555	2.22793	2.09673	2.71892	2.23103	2.73711	2.67871	2.36809	2.00634	2.45677	2.52723	2.60535	1.82549	2.40604	2.28192	2.58886	2.21644	2.75471	3.12917
FROGGER_LTR	0.250649	0.445446	0.3341	0.598324	0.185481	0.421855	0.295148	0.301934	0.324433	0.516888	0.461415	0.752595	0.320544	0.595922	0.424665	0.548299	0.514289	0.553075	0.549243	0.394384	0.691048	0.647846	0.480755	0.573306	0.524353	0.495206	0.537048	0.559721	0.720868	0.362192	0.622823	0.518867	0.649356	0.507566	0.4783	0.5027	0.631623	0.392504	0.353833	0.507308	0.243309	0.373615	0.507429	0.440306	0.417615	0.371123	0.518953	0.677875	0.663038
FW	7.04507	7.34427	7.21372	7.43692	7.37063	6.98772	7.11825	7.69649	7.23454	7.26923	7.28871	6.99257	7.7462	7.16525	6.91658	7.81141	7.06236	7.45027	7.2758	7.02884	7.60094	7.35768	7.48054	7.34205	7.06867	7.45781	7.16521	7.42713	7.37175	7.36971	7.0847	7.56341	7.11393	6.94115	7.30433	7.22805	7.70238	7.06879	7.2376	7.38896	7.02484	7.25636	7.3019	7.36528	7.41473	7.15269	7.07335	6.99836	7.51173
FW2_DM	3.19383	3.25159	3.32065	3.34106	3.48405	3.21015	3.18932	3.63699	3.24537	3.01955	3.461	3.46445	3.48262	3.38755	2.85042	3.31614	3.46719	3.28407	3.48357	3.3701	3.43206	3.71679	3.12418	3.72739	3.41035	3.18194	3.07421	3.22931	3.32263	3.21372	3.40771	3.30361	3.28488	3.39868	3.41258	3.24606	3.30791	3.53489	3.16252	3.35556	3.19726	3.36697	3.20432	3.78578	3.1523	3.64392	3.40426	3.17132	3.7459
FW3_DM	1.54038	1.86843	1.82654	1.78722	2.56517	1.71048	1.78177	2.2403	1.78445	1.73681	1.8459	2.1327	1.47758	1.86938	1.86983	1.85886	2.12329	1.79522	1.76964	1.73677	1.72556	1.68376	1.60675	2.04787	1.69629	1.75734	1.52301	1.86146	1.74831	2.00253	2.20178	1.93132	2.03977	1.52289	1.70161	1.78231	1.8996	1.53738	1.33325	1.60384	1.90727	1.68114	1.4594	2.19281	2.12762	2.28669	1.55638	1.65882	2.17431
G2_DM	3.2981	3.71349	3.42952	4.23937	3.96559	3.40272	3.90344	4.22989	3.40835	3.80285	3.5234	3.55701	3.67269	2.9559	3.72983	3.86985	3.89599	4.37292	3.44799	3.23697	4.05719	3.60285	3.49507	3.37409	3.57676	3.87022	3.45992	3.38455	3.44578	3.73623	3.54059	3.46234	4.25268	3.73964	3.54667	3.99061	3.72484	2.95908	3.69385	2.69606	3.5147	3.48857	3.59023	3.56413	4.16343	3.80443	3.38873	3.54734	3.4875
G3_DM	2.84533	2.9388	2.87185	3.05395	2.73784	2.87619	2.95662	2.83137	2.82497	3.03047	2.60954	2.83034	2.83767	2.96262	2.96994	3.01142	2.57408	2.52337	3.01055	2.95531	2.99421	2.80798	2.67355	3.063	2.86453	2.91429	2.82109	2.7381	3.00343	2.81753	2.84507	2.9021	2.88041	2.89724	2.62582	2.59343	2.83172	2.89681	2.7642	2.85454	2.87812	2.8	2.75843	2.82267	3.12376	2.95925	2.87228	2.8876	2.97886
G4_DM	5.03501	5.3372	5.27899	5.0637	4.98565	5.08714	5.10352	5.15782	4.90313	5.15033	5.11458	4.8699	5.11403	5.36933	5.18911	4.97366	5.36931	4.74883	5.12469	4.90917	4.88985	4.87146	5.23478	5.19593	5.06858	5.20395	5.12597	5.01146	5.04522	4.85789	5.2834	4.70655	5.03971	5.21579	4.98346	5.04707	5.16663	4.95929	5.11319	5.04609	4.70783	5.09969	4.9443	4.84009	5.01627	5.08587	4.86404	5.10297	5.01627
G5A_DM	4.8596	4.81599	4.99665	4.96322	4.67769	5.00403	5.1182	4.87757	4.798	4.82057	4.84426	4.84499	4.96581	5.11014	4.92183	5.08464	4.89527	5.06372	4.7698	4.95743	5.02181	4.88026	4.86364	5.10252	4.97885	5.05071	4.9648	4.883	4.74001	4.8579	4.97163	5.00855	4.84884	4.84206	4.95384	4.87883	4.88556	4.70039	4.81474	4.95937	4.92359	4.8838	4.85859	4.8677	4.80083	4.93994	4.91706	4.77303	4.81976
G5_DM	4.91039	4.76433	4.90142	4.85118	4.70903	4.7151	4.95882	4.78061	4.77196	4.9171	4.67627	5.04374	4.79372	4.8314	4.90631	4.9875	4.87838	5.04072	4.77772	4.8306	4.87858	4.59397	4.76071	4.91928	4.85592	4.96673	4.92279	4.89698	4.83801	5.03961	4.82695	5.00467	4.82052	4.72558	4.87144	4.75822	4.75845	4.6621	4.88173	4.91287	4.72458	4.80214	4.85433	5.00855	4.82571	4.91633	4.83714	4.90929	4.78139
G6_DM	2.32312	2.56993	1.59422	2.70706	2.56243	2.78521	2.24904	2.50116	1.7005	2.91454	2.20762	1.78912	1.75473	2.13964	1.93613	2.37537	2.26897	4.22612	1.9826	2.13833	3.86827	1.91934	2.1559	2.17537	2.05178	2.19291	2.33432	1.81503	3.23546	4.9284	2.80606	2.82146	2.14992	2.78647	1.61329	2.74208	2.45421	2.54886	2.1457	2.45971	1.87646	2.11567	2.07345	2.48864	3.1325	3.22665	2.06705	2.83061	2.0567
G7_DM	-1.6762	-1.60757	-1.52631	-1.14591	-1.63927	-1.41563	-1.6471	-1.65265	-1.49185	-1.11593	-1.25718	-1.50751	-1.83087	-1.34163	-1.33103	-1.24982	-1.50639	-1.57689	-1.50848	-1.54871	-1.38826	-1.40249	-1.43239	-1.80988	-1.49257	-1.49461	-1.23435	-1.64798	-1.42692	-1.22815	-1.36029	-1.31647	-1.38448	-1.19258	-1.28407	-1.31154	-1.36388	-1.19971	-1.77554	-1.28086	-1.71556	-1.84461	-1.55709	-1.74635	-1.58222	-1.20955	-1.33001	-1.36687	-2.01971
G_DM	2.93585	3.02159	2.68184	3.12134	3.21659	2.82414	3.04866	3.14307	3.31151	3.41411	2.77269	3.06735	2.91814	2.77029	3.36884	3.07175	3.33066	2.6696	2.96832	2.8722	2.84735	2.65749	2.90814	3.28117	3.15239	2.97467	2.80559	2.98329	2.99542	3.57796	3.14414	3.13681	2.89355	3.12508	3.01093	3.47439	3.4113	3.04778	3.10633	2.92571	2.79799	2.70958	3.12602	3.06082	3.18195	3.28515	2.7399	2.99863	2.77411
GTWIN_I	4.75646	4.65768	3.58442	4.46374	4.61792	5.28719	4.696	3.25998	4.2899	5.19381	4.35043	2.98338	4.37712	4.88539	4.52175	4.40854	4.48771	5.84644	3.75772	5.55021	5.69149	4.38572	4.61033	4.55735	4.42412	5.19185	5.02615	3.635	3.61183	3.62526	3.5787	5.10289	3.88239	5.52643	5.29058	4.76746	5.14161	4.66234	4.6732	4.19236	4.72897	3.5631	4.7527	5.72853	5.35029	4.78025	4.54696	4.86557	5.87946
GTWIN_LTR	1.71138	1.09026	0.709231	1.1515	1.83999	2.33604	2.14602	1.70373	1.15261	2.29022	1.33952	0.346249	0.868076	1.51397	1.13902	1.37033	1.46954	2.10964	0.872581	3.13945	1.98073	1.55694	1.46241	1.59937	1.14838	2.10127	2.46947	0.526096	1.03369	1.06687	0.840394	1.88946	0.612908	2.47157	1.72597	0.811652	3.08831	1.75506	1.8549	1.79633	1.48061	0.224639	1.79235	2.74035	1.73513	1.53439	1.28555	2.01961	1.79328
GYPSY10_I	5.04007	5.29453	4.98925	5.15272	4.746	5.44586	4.72666	4.80536	4.79652	4.67113	5.00749	4.75769	5.01038	4.74626	4.75204	5.15638	4.67615	4.56874	5.36984	5.00784	4.4147	5.00962	4.90823	5.07955	5.1918	4.98858	5.0036	5.51529	5.06018	4.69956	4.84733	4.77415	5.64471	5.14903	4.76213	4.96614	5.21338	5.08651	5.09819	4.89936	5.07082	5.20926	5.05667	5.29794	5.31564	4.93924	5.31299	5.41557	5.22894
GYPSY10_LTR	2.06319	2.19583	2.00765	2.19497	1.98114	2.2081	2.01421	1.98181	1.93475	1.97914	2.17149	1.99322	2.01331	1.8694	1.92454	2.12524	2.00932	2.00066	2.10898	2.07543	2.04815	1.99576	2.05406	2.05549	2.24011	2.04729	2.09726	2.18026	2.10234	1.91573	1.94695	2.09013	2.27467	2.07182	2.04154	1.96631	2.12412	2.01794	2.05975	2.09731	2.11127	2.28418	2.09981	2.16815	2.18392	2.01462	2.22681	2.11199	2.06078
GYPSY11_I	3.0019	2.54483	3.13201	2.34867	2.98748	3.14501	3.15686	2.59121	3.45849	2.29501	3.03442	2.97559	3.4228	2.91092	3.01683	3.46841	2.75037	3.35108	3.0323	2.70524	2.61111	2.7378	2.80209	2.83374	2.95262	2.7236	2.93687	2.69892	2.76578	3.39984	2.71474	3.20733	2.9448	2.60776	2.74162	2.62252	2.47589	2.79869	3.90092	2.99565	3.28423	2.7998	3.5782	2.70339	2.53317	2.69549	2.65886	2.79753	2.82019
GYPSY11_LTR	1.70896	1.39721	1.60051	1.64603	1.14886	1.53909	1.52655	1.21802	1.5957	1.45496	1.58165	1.44964	1.54665	1.69208	1.37987	1.49929	1.54528	1.79256	1.56155	1.57505	1.74555	1.32943	1.52739	1.49396	1.77241	1.67124	1.7596	1.49441	1.50509	1.64182	1.48352	1.66059	1.55122	1.55104	1.76005	1.22465	1.52286	1.47171	1.60004	1.68042	1.65561	1.53454	1.59112	1.49651	1.28503	1.48103	1.33916	1.48939	1.35966
GYPSY12A_LTR	3.76854	3.61302	3.54252	3.62057	3.71472	3.60633	3.8901	3.68184	3.5118	3.54122	3.54403	3.78976	3.60687	3.54029	3.5366	3.46994	3.50755	3.3917	3.46458	3.83689	3.07534	3.47146	3.41628	3.32059	3.85186	3.44765	3.52187	3.6439	3.11755	3.70937	3.8193	3.40241	3.38248	3.64499	3.3161	3.64249	3.59292	3.6413	3.57922	3.71949	3.55519	3.30715	3.84268	3.59208	3.6959	3.32333	3.44233	3.72959	3.40014
GYPSY12_I	4.74998	4.63882	4.57763	4.61484	4.35826	4.82486	5.25718	5.31651	4.53951	4.57704	4.26541	5.63743	4.62953	4.14251	4.76672	4.40357	4.44846	4.62882	4.86548	4.9377	4.43255	4.17411	4.47687	4.43846	5.17287	4.65021	4.42406	4.64527	3.11776	4.31477	4.94122	4.81165	4.45375	4.83631	4.20065	4.48824	4.48334	4.37743	5.72733	5.02973	5.34808	4.26948	4.56967	5.71042	4.56633	4.64386	4.31721	5.25834	4.30562
GYPSY12_LTR	4.61358	4.51501	4.79372	4.13471	4.85454	4.86846	4.90599	4.4076	5.03887	4.11095	4.0594	7.13079	5.14469	4.01594	4.99521	5.49921	4.38842	4.70315	4.94514	4.8643	5.02039	4.22148	4.93927	4.05783	4.60488	4.94843	4.64995	5.21987	3.28794	5.77096	4.04544	4.95757	4.30873	4.17375	3.9331	3.90887	4.35128	3.92125	6.59376	5.07988	7.62851	3.82423	5.28802	5.10374	4.3886	4.24563	4.36654	4.55337	4.11043
Gypsy1-I_DM	4.32767	6.96276	6.01104	6.37157	5.74211	6.77667	5.98005	5.96694	7.19058	5.38858	5.36165	4.54734	5.39479	8.16331	4.92423	4.74112	6.85482	5.08467	6.88009	5.15609	4.45831	7.54726	5.99625	6.41823	4.98762	6.57507	5.3688	7.37309	6.17912	4.12435	4.5655	5.60512	6.71034	9.21304	5.35211	4.74201	6.75392	6.09167	7.0161	6.92768	9.58955	4.24855	4.24448	7.36169	7.69693	7.70777	6.53853	6.18383	5.20454
Gypsy1-LTR_DM	0.690784	2.01689	0.474269	1.45114	0.730013	1.75238	1.41082	1.45788	1.18935	1.36689	0.826179	0.970185	1.08038	2.19646	0.601002	0.715859	2.09404	1.01062	3.12754	0.794829	0.523885	1.99264	2.31658	0.964579	0.925016	1.45842	2.26418	2.01766	1.27604	0.540969	0.38662	0.529049	1.97903	2.6475	0.559473	0.758929	1.38848	1.11935	1.67537	1.92674	3.63016	0.70937	0.191257	1.77334	1.2664	1.91249	1.28034	1.53272	1.4253
GYPSY2_I	5.42146	5.92201	5.58708	5.85269	5.50544	5.79524	5.36854	5.54828	5.39061	5.82848	5.50706	5.67486	5.79797	5.53018	5.63017	5.62757	5.67923	5.38885	5.71117	5.72329	5.87265	5.63514	5.78512	5.81286	5.95107	5.87282	5.31317	5.89744	5.58051	5.6058	5.87653	5.76154	5.57407	5.76197	5.78944	5.5993	5.82636	5.58266	5.62875	5.70946	5.6781	5.47248	5.40629	5.28675	5.85341	5.91473	5.62362	5.46731	5.21794
Gypsy2-I_DM	5.73928	7.05597	4.71447	5.61389	6.85827	4.71803	4.7173	5.14638	4.9463	4.4121	5.88758	6.33702	4.94904	7.29223	6.3371	5.47167	7.0475	5.98463	5.28497	5.20655	5.94502	4.96029	8.36354	5.67804	6.31521	5.35627	7.11535	5.49086	6.85969	5.77946	6.12058	4.90634	5.65713	5.63338	5.78686	5.51677	5.66569	5.23967	6.87689	6.65502	5.01981	5.31154	5.16354	6.92773	7.19969	6.49412	9.49031	5.18378	4.84641
GYPSY2_LTR	1.58259	2.14035	1.84221	2.13909	1.79956	2.2168	1.27299	1.55449	1.87281	1.98638	1.72624	1.85707	1.87987	1.4846	1.70921	1.9825	1.71724	1.76081	1.5838	1.93071	1.99556	1.71291	2.23346	2.10782	2.02958	1.95758	1.54036	1.59514	1.77061	1.9297	2.10065	2.05793	1.9453	2.05625	1.69842	1.49193	1.92617	1.85268	1.7671	1.92804	1.93862	1.5678	1.96368	1.62394	2.19791	2.17557	2.1124	1.72974	1.27266
Gypsy2-LTR_DM	2.84299	3.09983	2.83099	2.72583	2.65478	2.65832	2.18748	2.78358	2.32191	2.71089	2.77425	3.00638	2.85556	3.26825	2.99013	2.68656	3.16895	2.84353	2.86779	2.39456	3.0915	2.78187	3.90295	2.81933	2.81334	2.76841	3.28434	2.57169	3.14833	3.16613	3.02494	2.70143	2.8304	2.71206	2.86102	2.69879	2.77879	2.72653	2.98634	3.04691	2.62713	2.70367	2.65393	3.12217	3.14502	3.05184	4.31523	2.60494	2.80073
GYPSY3_I	3.9527	3.70431	4.32467	4.13679	4.00493	3.77493	4.18097	4.15521	3.76331	4.47405	4.25104	3.92908	3.99144	4.17053	4.11219	4.34906	4.06506	3.50017	4.18966	3.95876	4.39606	3.75762	4.05816	4.18441	4.15589	4.11733	4.01424	3.84833	3.99109	4.01543	4.37371	3.93156	4.1628	4.22408	4.33986	4.04652	4.35046	3.72271	3.84969	3.87504	4.07645	3.49296	3.60707	3.75431	4.68479	4.30076	4.22256	3.59832	4.42095
GYPSY3_LTR	0.607161	0.42554	0.121752	0.514835	0.879622	0.686726	0.506578	0.738762	0.533347	0.517387	0.841812	0.632	-0.168348	0.737102	0.620026	0.723163	0.754826	0.752144	0.558623	0.634539	0.369051	0.232981	0.362044	0.44218	0.409833	0.253512	1.10904	-0.0371658	0.243985	0.895875	1.0965	-0.190868	0.707308	0.67246	0.292991	0.688135	0.749952	0.832739	0.369569	0.347336	0.180776	0.621917	0.422025	0.525348	0.738627	0.380452	0.650474	0.48144	0.535796
GYPSY4_I	6.27343	6.08613	6.24531	6.04953	6.31782	6.12115	6.38446	6.30449	6.28396	6.08447	6.09086	6.2469	6.21759	6.30761	5.97086	6.22997	6.39599	6.2384	6.18264	6.42362	6.11526	6.11714	6.20681	6.35676	6.13429	6.0895	6.25417	6.0513	6.03803	5.98517	6.14839	6.31907	5.99686	6.00211	6.27171	6.19928	6.12652	6.48786	6.49156	6.10805	6.12796	6.20418	6.51307	6.37656	5.96066	6.16491	6.0154	6.00474	6.10691
GYPSY4_LTR	2.34634	2.20258	2.15529	1.88421	2.36214	2.17436	2.69994	2.24528	2.26259	2.19255	2.15326	2.32914	2.36278	2.02055	2.27216	2.32859	2.54137	2.12858	2.22313	2.49639	2.27641	2.22107	2.28779	2.3781	2.38336	2.22551	2.21963	1.88457	2.18868	2.05231	2.09654	2.29912	2.24135	2.02306	2.40816	2.27646	2.33282	2.37299	2.51351	2.30711	2.30951	2.11713	2.3519	2.35924	2.0462	2.17872	2.01779	1.91697	1.91679
GYPSY5_I	3.05757	3.53927	3.87905	3.39799	3.83307	3.96754	3.27794	4.04239	3.86921	4.06391	5.05606	4.14614	4.1913	3.44298	3.84504	3.72393	3.65883	3.73741	4.51998	3.09815	3.1411	3.89293	4.11087	3.36319	3.64689	3.37614	3.9924	3.61049	4.07796	4.18839	3.78773	3.51065	4.02369	3.971	3.10319	3.30512	3.04528	4.81972	3.57971	3.55935	3.14158	3.80176	3.91897	3.11151	3.34163	3.87067	3.13244	3.58167	4.03706
GYPSY5_LTR	-1.0572	-0.344294	-0.357151	-0.625406	-0.314925	-0.181872	-1.721	0.340231	0.617519	-1.14186	0.618875	-0.370606	-1.26277	0.259568	0.08295	0.215648	-0.396271	1.37218	-0.165685	0.308817	-0.315538	-0.452108	-0.333788	-0.242069	-0.616675	0.531864	-1.04425	-0.543004	-0.170176	0.2404	-0.213002	-0.207948	0.520429	0.659462	0.125426	1.34148	-0.375387	0.19694	-0.554304	0.0864774	-0.0644052	-0.280144	0.0883477	-0.31362	0.462637	-0.072169	-0.30812	-1.12932	-0.650825
GYPSY6A_LTR	2.38061	2.42675	2.33324	2.50629	2.46109	2.52668	2.54985	2.78333	2.57541	2.63967	2.46492	2.72877	2.54831	2.35759	2.43743	2.54894	2.60447	2.34693	2.53815	2.41372	3.29726	2.47051	2.58184	2.45185	2.57977	2.55277	2.56827	2.53555	2.34694	2.52127	2.42999	2.52999	2.42715	2.33436	2.47292	2.43712	2.46688	2.33546	2.67123	2.73722	2.57751	2.40656	2.34312	2.35742	2.78771	2.51162	2.4443	2.41191	2.67198
GYPSY6_I	4.86809	4.25893	4.66149	4.97808	4.71358	4.83559	5.04517	5.01263	4.80422	5.0657	5.01113	4.80969	4.82392	4.15336	4.67928	5.00732	4.92412	4.64261	4.79074	4.93778	5.30536	4.92214	4.71535	4.95179	4.79421	5.024	4.23713	4.4723	4.4911	5.5796	4.43693	4.85176	4.77131	5.22508	4.87963	4.92023	4.94644	4.98305	4.92961	5.09629	4.72596	4.58589	4.66544	5.08668	5.23703	4.71365	4.70896	4.8068	4.47011
GYPSY6_LTR	1.30691	3.32329	2.35229	2.19886	1.79041	2.87999	2.44734	1.82064	2.61129	1.61521	2.14559	2.20191	2.37884	2.66792	0.885553	2.0606	3.20533	1.56632	3.00452	1.93177	2.1632	3.1998	1.77467	2.30653	2.32558	2.16254	2.13197	0.977914	2.22499	1.47568	1.74896	2.00003	1.61249	4.17799	2.58141	2.28551	2.63596	1.89176	3.03631	2.56635	4.55066	1.75002	1.71924	2.76034	2.54113	3.0373	2.23028	2.21315	2.52623
GYPSY7_I	5.30419	4.34817	5.35063	4.33709	5.37769	4.82547	4.87104	4.71828	5.1309	4.98929	4.98655	4.39997	5.00985	4.19651	4.70105	3.78017	4.78894	5.10187	4.16234	4.35937	4.60465	4.99523	4.49306	4.76172	4.5576	3.42035	3.81992	4.99312	5.09599	4.5616	4.07573	5.55397	4.42	4.81212	4.69041	4.56693	4.31473	4.75186	4.47274	4.5712	4.7554	4.49422	5.19831	5.13887	4.8215	5.10521	4.91834	3.55565	5.36132
GYPSY7_LTR	0.94113	0.098356	0.976097	-0.0199005	0.761757	0.478479	0.833773	0.554572	0.806895	0.464735	0.592589	-0.00552323	0.195722	-0.277607	0.62221	-0.217994	0.326056	0.500153	-0.158584	0.07898	0.566207	0.176292	0.392574	0.352553	0.428912	-0.703034	-0.310106	0.727074	0.828705	-0.039266	0.359641	0.976573	0.553629	0.38735	0.292354	0.28375	-0.153063	0.148875	0.138457	0.829308	0.535158	0.225301	0.546531	0.686192	0.229975	0.519185	0.727358	-0.531563	1.12479
GYPSY8_I	3.79266	3.62026	3.61958	3.84549	3.49637	3.78004	4.04603	3.51316	3.85104	3.78044	3.57241	3.71476	3.69679	3.49463	3.823	3.78682	3.86841	3.3799	3.418	3.5032	3.67569	3.32302	3.64649	3.4863	3.52439	3.83178	3.68498	3.51646	3.5715	3.6453	3.62329	3.97891	3.63394	3.8078	3.51489	3.51719	3.65383	3.54601	3.62826	3.70024	3.7525	3.64024	3.72461	3.73829	3.92029	3.69836	3.65019	3.55488	3.53332
GYPSY8_LTR	2.06054	2.02012	2.10081	1.85916	1.8621	1.91953	2.2057	1.8641	2.02739	1.91962	2.11406	1.66592	1.66555	1.8851	1.8162	2.22667	1.61275	2.01517	1.91797	1.8201	2.01876	1.71293	1.91383	1.9835	1.90653	2.13199	2.12681	2.02965	2.0024	1.743	1.93039	2.09473	1.87155	2.04973	2.02271	1.96157	1.88148	1.88958	2.0162	1.9551	1.80417	1.94676	2.11004	1.98326	1.96649	1.84627	1.98824	1.97309	1.90704
GYPSY9_I	2.21293	1.79037	2.04576	1.93055	2.24857	1.98185	2.24437	1.95496	2.08147	2.25299	2.12987	2.1325	1.94571	2.18403	2.19989	2.41021	2.04267	2.06581	2.09404	2.01882	2.08702	2.19977	2.15499	1.74835	2.01373	2.45091	2.21942	2.32294	2.35091	2.11717	1.87155	2.39913	2.12037	2.14746	2.08913	2.03018	2.21162	2.09606	2.03914	2.07195	1.78669	1.92117	2.16362	1.82131	2.00879	2.11725	2.14382	2.12646	2.16463
GYPSY9_LTR	0.697828	0.58779	0.381884	0.359892	0.666217	0.250611	0.432362	0.172989	0.52752	0.195972	0.647799	0.230473	-0.0490083	0.350402	0.297615	0.330112	0.248902	0.502637	0.249583	0.516324	0.424448	0.369301	0.410531	0.536014	0.398233	0.577064	0.681619	0.582014	0.523185	0.343573	0.532861	0.474598	0.491695	0.216571	0.357084	0.252005	0.438878	0.367615	0.505215	0.426789	-0.250081	0.505063	0.263121	0.230665	0.458385	0.429904	0.368153	0.399915	0.313127
GYPSY_I	5.59108	4.85328	4.81447	4.99637	6.63024	5.29579	5.68509	4.52977	6.77813	6.29942	4.84376	4.44371	5.08576	6.19528	5.12585	6.83719	7.98446	5.57305	5.28557	8.37183	5.23347	5.03864	4.95863	5.96112	4.59464	5.65739	5.44442	5.25926	4.79751	4.88229	4.6219	5.13299	5.2803	5.4133	5.33746	4.80741	5.29452	4.82133	5.3573	4.94581	4.80546	4.76297	4.88932	5.40103	8.4494	6.07596	8.81188	4.99306	4.93312
GYPSY_LTR	1.75377	0.926274	1.2338	0.681737	3.37165	1.69882	2.28896	1.0869	2.71412	2.8602	0.62081	0.525292	1.61374	2.35916	1.00501	2.45986	3.53146	1.16189	1.82132	3.6211	0.392749	1.0932	1.07795	2.20022	0.431396	1.25722	3.22866	1.57327	1.35719	0.947894	0.452541	1.06471	1.52485	1.76462	1.54913	0.915855	1.51535	0.962669	1.63477	0.386163	1.43901	0.888637	1.1875	2.08368	3.73702	2.1131	4.21627	1.10175	-0.0412542
HELENA_RT	3.37905	3.60034	3.70072	3.2348	3.58423	3.41037	3.20733	3.73737	3.30235	3.93536	3.31531	3.41105	3.71393	2.94733	3.40946	2.69054	3.4329	3.5308	3.41423	3.35512	3.32934	3.28409	3.57326	3.53621	3.56837	2.88066	3.47836	3.38353	3.51661	3.17557	3.11789	3.70894	2.99894	3.5861	3.40808	3.47833	3.25524	3.15518	2.96996	3.19295	3.14097	3.4682	3.3248	3.45936	3.55029	3.70081	3.34609	3.10217	3.75177
HETA	4.77958	5.75731	5.5077	5.22922	5.50281	5.66502	5.25734	4.91852	5.88611	5.94229	3.76086	7.64835	5.11769	5.5571	5.56222	4.62968	5.0587	5.84461	4.4756	5.36169	4.33533	4.97562	5.91127	5.4008	4.87064	5.36626	5.11679	5.48444	5.25592	5.35584	5.77159	5.49801	5.26802	5.4683	5.51586	5.88914	6.05371	5.35017	5.84246	5.86342	4.56413	5.08749	5.46895	5.30913	5.55175	5.70369	5.36267	6.38123	4.68906
HETRP_DM	3.48177	3.33404	3.75856	2.88461	2.58414	3.894	3.82775	3.39225	3.60595	4.89326	3.57856	3.26699	3.68285	2.95398	3.62619	2.51582	3.24071	3.32608	3.58028	2.27501	0.676544	3.38415	3.87697	4.45035	3.04722	3.86167	3.80414	4.81271	3.86057	3.29831	3.41439	2.33712	3.71452	2.65419	4.23308	2.77487	3.94461	4.39675	3.52683	3.19744	2.25646	4.05042	2.40378	2.55003	3.53377	3.72106	3.44935	4.12507	2.80504
HMSBEAGLE_I	7.50676	6.31643	6.55256	6.49804	6.91326	7.00987	5.97644	6.37958	6.46609	5.23847	6.50729	7.22621	8.33118	6.39219	6.46506	5.34059	6.55051	8.67043	6.09387	5.86863	7.71357	5.05498	5.89641	5.79259	6.01988	7.05217	5.44588	8.4328	8.18989	6.51582	6.40745	6.68745	6.83783	6.74834	6.54464	6.068	7.07154	5.90341	6.35147	6.19424	6.16817	5.22515	10.2897	6.51692	6.79294	7.20054	5.61529	6.73853	7.31639
HOBO	4.84499	4.88871	5.00052	4.63119	4.98197	4.77198	5.0081	4.72853	6.34014	6.23573	4.8798	5.12421	4.58526	4.52957	4.81061	4.77366	4.9389	4.89227	4.71224	5.68897	4.46225	4.51839	5.13793	5.20348	4.58208	4.54868	4.88799	5.55687	5.54354	4.82877	4.35295	5.27905	4.92386	4.73037	5.93551	4.6019	4.67993	6.04853	4.91772	5.06233	4.15183	5.7212	4.90949	4.49965	5.31325	5.61197	5.17673	5.30856	5.02875
IDEFIX_I	6.46516	6.8595	7.18271	6.96067	6.79703	6.35418	6.36456	6.50129	7.9179	6.67467	6.71571	7.11638	7.2308	6.51877	7.04909	6.58031	6.91349	6.87242	6.7735	6.83611	7.90832	7.4862	6.72372	7.01947	6.63453	6.28397	6.44654	6.81171	6.86397	6.83948	6.63338	6.18801	6.88082	8.67548	6.65963	6.49309	6.45255	6.94568	6.6419	6.898	7.06957	6.43693	9.86283	6.47814	6.44153	6.51169	6.54728	6.77209	7.17012
IDEFIX_LTR	4.40992	4.27633	4.63172	4.71338	4.56942	4.24338	4.2301	4.4022	4.78355	4.36909	4.41486	4.75021	4.88005	4.31135	4.51435	4.27108	4.28713	4.6408	4.48822	4.36703	4.63951	4.55777	4.45564	4.54747	4.34185	4.05552	4.17274	4.41997	4.46737	4.41855	4.36112	4.09153	4.48817	4.90161	4.30827	4.36663	4.21667	4.60055	4.43981	4.51314	4.49984	4.28056	4.99493	4.21408	4.19546	4.29649	4.25102	4.2942	4.5239
I_DM	5.34762	5.45647	5.69008	5.43135	5.93899	5.67835	5.30852	6.14499	5.60512	5.58391	5.58323	5.98695	5.46875	5.59125	5.27037	5.49847	5.64478	5.72797	5.57358	5.54305	5.68374	5.56761	5.43503	5.46683	5.3744	5.29763	5.50237	5.70685	5.53153	5.80097	5.52122	5.28591	5.76592	5.32374	5.68941	5.43266	5.80764	5.52748	5.37192	5.53705	5.33251	5.46325	5.57	5.44838	5.75995	5.57773	5.41185	5.62908	5.53982
INVADER1_I	4.70897	4.72961	4.95067	4.50739	4.75539	4.24081	4.52438	4.91624	4.49109	5.35136	4.73643	4.16126	4.66557	4.4234	4.68012	4.73961	4.60893	4.56387	4.47939	4.99638	5.47067	4.41489	4.81198	5.37166	5.50749	4.79997	6.13543	4.68201	4.00339	4.88696	4.00461	5.22247	4.79364	4.39028	4.6527	5.0504	4.5806	5.54334	4.58862	4.54804	4.6839	4.29322	5.41369	4.81439	5.05457	4.59656	5.60362	4.86295	5.55622
INVADER1_LTR	3.17067	2.99789	3.34157	3.29567	3.1699	2.85357	2.95485	3.57919	2.93776	3.4359	3.15197	3.25664	3.14347	3.12674	3.30368	3.22846	3.02494	3.09471	3.39601	3.50285	3.50843	3.13023	3.13092	3.43138	3.39053	3.27847	3.96433	3.3239	2.65659	3.51917	2.85325	3.4349	3.27956	3.43593	3.27812	3.41137	3.01376	3.70127	3.14008	3.15471	2.91016	3.05167	3.46238	3.75968	3.34259	3.30906	3.64842	3.08293	3.6333
INVADER2_I	6.29846	6.21351	6.3104	6.0557	5.99735	6.10191	6.15022	6.30449	6.25956	5.94466	6.13106	6.09415	6.20156	6.11118	6.15529	5.96298	6.17127	6.31147	6.33571	6.14196	6.09961	6.03957	6.22131	6.23756	6.05525	6.23167	6.19869	6.25761	6.12734	6.14444	6.09132	6.03335	6.22424	6.21826	6.23443	6.16266	6.10182	6.17499	6.18428	6.31486	5.9985	6.24022	6.08241	6.03673	6.29345	5.89453	6.31847	6.15403	6.14767
INVADER2_LTR	3.09571	2.97193	3.00643	2.99114	2.89743	2.84309	3.00603	3.01911	2.97795	2.94938	2.99161	2.90886	3.03299	2.90106	2.92756	2.83258	2.96086	3.04336	3.00552	2.96138	2.96368	2.80619	3.01919	3.04105	2.89599	3.02187	2.87756	3.0232	3.00914	2.95367	2.97758	2.95915	3.01336	2.9734	2.95968	2.98882	2.88546	2.97023	2.90499	3.01186	2.9925	2.98062	3.00549	2.81336	2.94418	2.75714	3.03451	2.98997	2.99995
INVADER3_I	4.43713	4.41234	4.24581	4.18014	4.50208	4.5256	4.06286	4.38162	4.3746	5.05937	4.25091	4.59828	4.539	4.5437	4.49947	4.7099	4.461	4.47262	4.12034	4.27102	4.48979	4.92948	4.45366	4.8523	4.3749	4.46027	4.09895	4.36066	3.92447	4.21188	4.64072	4.79718	3.99714	4.1511	4.04962	4.14187	4.34449	4.51543	4.92039	4.08326	3.82558	4.4269	3.95058	3.93351	4.18	4.7935	3.91145	4.35049	4.48283
INVADER3_LTR	1.02326	1.08946	1.41297	1.09267	1.30959	1.13659	1.13989	1.06078	1.04696	1.40317	0.964685	1.22238	1.23661	1.04933	1.25702	1.25587	1.03889	1.37894	0.867331	1.31202	0.995432	0.832993	0.895635	1.06606	1.13512	1.40446	1.04401	1.10912	0.89362	1.14811	1.21254	1.08424	0.928109	0.983114	0.843739	1.28288	1.07711	0.922586	1.34336	0.65757	0.568328	1.35713	0.602256	1.20546	0.914804	1.28149	0.700937	1.56649	1.20799
INVADER4_I	4.91474	5.63714	5.06946	4.67423	5.58903	4.34265	4.41621	5.22873	5.15323	5.25108	4.42152	4.43924	5.09683	4.74825	5.06428	4.9979	4.12478	4.62497	4.39841	4.93478	4.53015	4.87778	4.84129	5.83308	4.73538	4.65823	4.31266	4.97137	5.06016	5.51837	4.8461	4.68678	4.38242	6.52098	4.80359	5.15651	4.78028	5.27119	4.80272	4.35478	4.71452	4.2414	4.82857	4.81282	4.68189	5.00822	4.81925	4.45281	5.85609
INVADER4_LTR	2.65385	2.88156	2.85985	2.76129	3.28942	2.10765	2.29953	2.70514	2.99436	2.98543	2.58914	2.69728	2.88496	2.68104	2.63719	2.79998	2.36672	2.64485	2.73009	2.66076	2.83619	2.79714	2.77227	3.50163	2.75127	2.60355	2.36519	2.90159	3.01982	2.9131	2.91228	2.98041	2.38288	3.55777	2.81476	2.99801	2.6197	3.01951	2.98156	2.93952	2.67344	2.68292	2.54364	2.72457	2.88032	2.89173	2.78482	2.31879	3.04883
INVADER5_I	1.51441	1.64761	1.58132	1.59242	0.710306	1.45055	1.15753	1.71557	1.70423	1.9291	1.67439	1.41253	2.70865	1.42989	2.03073	1.664	1.26865	1.41206	1.68371	1.89708	1.51232	1.55436	1.14895	1.43654	1.61405	1.69378	1.71527	2.05041	1.60832	1.7384	1.55254	1.56244	1.69546	1.70254	2.03548	1.82655	1.41779	1.5722	1.73584	1.70259	1.38429	2.21027	1.7643	1.41124	1.36501	1.42632	1.50724	1.50304	1.58422
INVADER5_LTR	-0.537944	-0.640547	-0.583117	-0.529456	-0.47672	-0.532835	-0.420576	-0.500798	-0.614821	-0.566332	-0.644813	-0.876393	-0.349376	-0.772635	-0.394094	-0.306453	-0.624256	-0.526294	-0.566281	-0.631873	-0.828188	-0.622928	-1.01434	-0.395843	-0.462257	-0.699599	-0.357344	-0.638011	-0.530469	-0.327534	-0.546545	-0.686973	-0.291096	-0.543417	-0.362064	-0.521493	-0.668959	-0.561666	-0.459868	-0.510912	-0.534811	-0.328718	-0.58443	-0.546405	-0.429838	-0.635969	-0.674566	-0.442391	-0.422603
INVADER6_I	4.29358	4.10671	4.49485	4.48209	3.97573	4.13486	4.05558	4.92729	4.27884	4.95559	4.45039	4.0178	4.49367	3.65584	3.8959	3.8924	4.50653	3.95488	4.28015	4.25384	4.34558	3.63367	4.45076	4.6533	4.65373	3.58884	3.65259	4.26377	4.24508	3.8132	3.95308	4.44707	3.96895	4.41401	4.61281	4.74287	4.59485	4.51553	3.70175	4.11537	4.13862	4.42039	4.04177	4.62148	4.20795	4.48097	4.56494	3.76014	4.51414
INVADER6_LTR	1.30682	1.11435	1.4808	1.57608	1.6835	1.83385	1.25855	1.55049	1.64074	1.93237	1.55484	1.44054	1.81802	0.948796	1.27794	1.19964	2.08041	1.5172	1.47257	1.16915	1.25836	1.27597	2.08125	1.97226	2.29712	1.05775	0.933491	1.26062	1.1243	0.926628	1.15814	1.38705	1.31102	1.40235	2.33574	2.59017	2.25365	1.50627	0.97141	1.28554	1.86629	1.67969	1.30218	1.82123	1.81937	1.79924	1.93752	0.605635	1.4258
IVK_DM	4.59088	4.55152	4.56639	4.5885	4.86753	4.91865	4.53073	5.33644	4.76161	4.7676	4.76238	5.00939	4.55791	4.90521	4.54269	4.75814	4.75274	4.83803	4.53448	4.69867	4.65435	4.76696	4.61607	4.82148	4.54826	4.71595	4.36952	4.80827	4.93764	4.77817	4.7638	4.65809	4.56625	4.40761	4.90924	5.09934	4.73473	4.79283	4.51489	4.51077	4.50867	4.52279	4.87092	4.78674	4.80678	4.74867	4.42221	4.75684	4.94903
Jockey	7.38999	6.97683	7.62852	7.32909	6.3901	7.66625	7.27593	7.05543	7.5507	7.56143	8.45686	6.32697	7.35363	8.20669	6.92788	7.56837	6.5833	7.36017	7.02014	7.13639	8.10686	7.05755	7.15765	7.67368	7.20954	8.33612	7.1116	6.84887	8.00046	6.39455	6.81021	7.38648	7.02686	7.12237	8.27838	8.15419	8.62162	7.99724	6.72869	7.74677	7.30643	7.48614	6.14147	7.09343	7.4196	7.49277	7.47346	8.38869	7.04416
JOCKEY2	4.76392	4.6741	4.16407	4.47105	4.13685	4.59826	4.54017	4.39511	4.29042	4.61391	4.44763	4.48226	4.49647	4.57085	4.4651	4.59106	4.25807	4.78965	4.51515	4.34591	4.36142	4.16613	4.4583	4.42706	4.44263	4.49088	4.58222	4.61304	4.42017	4.26084	4.41138	4.45934	4.5672	4.37264	4.51074	4.50971	4.37449	4.50102	4.34099	4.53869	4.13804	4.42785	4.42623	4.30528	4.46763	4.37327	4.15035	4.3748	4.31799
LOOPER1_DM	3.17426	3.42807	3.34781	3.07576	3.0143	3.40781	3.16554	3.16822	3.31967	3.44296	3.1598	3.05641	3.05344	3.38343	3.34402	3.34079	3.43851	2.9156	3.38591	3.15243	3.07989	3.06826	3.37824	3.32559	3.05442	3.27034	3.39671	3.26347	3.05188	2.94452	3.18654	2.60194	3.00427	3.10201	3.14888	3.12239	3.29109	3.28153	2.97593	3.12326	2.6744	3.16007	2.99195	3.23113	3.26062	3.30616	3.14266	3.24811	3.54421
LTRMDG3_DM	1.64409	2.87322	4.06047	1.71614	2.30938	2.47744	2.73357	2.7615	1.917	3.04038	2.37174	5.29827	3.71767	1.59944	2.48681	2.19616	2.91635	2.35108	2.82964	1.72808	1.8993	2.65024	3.69628	2.48276	3.19555	2.45363	1.30718	2.54326	2.65623	2.68842	3.16048	2.01631	2.10925	2.02064	3.95445	2.29919	2.94238	2.48218	2.37161	2.2207	2.22786	1.80284	2.33582	1.86324	2.20289	1.62956	2.14034	1.8445	2.44445
M4DM	4.74612	5.07251	4.71269	4.98072	5.20329	5.53205	4.63033	4.96534	4.73709	5.19846	4.90955	4.86809	4.84117	4.44652	4.96376	4.6799	4.59246	4.97434	5.21395	4.65735	4.94576	5.223	5.2467	5.0931	5.22287	4.64207	4.78918	5.00134	5.04004	5.59165	5.18049	4.60117	4.9383	5.02236	4.99328	4.52437	4.96034	5.04743	6.81639	5.09684	4.6873	6.34764	6.1297	4.66447	4.85636	4.80036	4.81611	5.10789	4.83023
MARINER2_DM	4.09735	4.07851	4.04333	4.00867	3.94204	4.18749	3.89679	3.92535	4.09474	4.08915	4.05934	4.05229	3.91491	4.0579	4.0087	4.20373	4.20839	4.1563	4.1693	4.13221	4.09131	3.9067	3.9506	4.16632	4.20739	4.07501	4.16086	4.36217	3.96323	3.78898	4.10758	4.37223	4.45766	4.03807	4.23645	4.03598	3.9727	4.26553	3.90239	4.06891	3.77691	3.97746	3.96077	3.88926	4.01971	4.06341	3.90385	4.16027	3.94246
MAX_I	7.91894	6.63806	7.84109	9.0128	6.81834	5.96038	6.31932	6.04295	7.48213	6.84636	5.54155	8.93076	6.64989	7.01586	6.12052	7.88346	7.61203	7.84393	7.031	9.00596	7.20898	9.35633	7.09973	5.75383	6.83714	7.79673	6.25997	7.51262	5.52693	6.29168	5.60618	7.6048	5.8732	6.64141	7.28982	7.64757	6.6445	6.39649	6.7687	7.34671	8.42959	6.92096	6.61916	7.6	6.76604	8.65032	8.27871	7.96424	6.83053
MAX_LTR	3.40243	2.00274	2.71865	4.24193	2.16584	1.64948	2.21861	2.11879	2.84209	2.32899	1.24684	3.44656	1.7298	1.72579	1.45392	2.51035	2.80333	2.68754	2.43805	3.62546	2.38201	4.19522	2.62302	0.9899	2.24517	2.83202	1.28323	2.63614	1.62172	1.90383	0.899812	2.95592	1.28159	2.16442	2.37234	2.75853	2.08067	1.90154	1.87592	2.54152	3.48256	2.16685	1.87593	2.8169	2.11157	3.30673	3.71638	2.75406	1.75735
MDG1_I	6.84925	7.15065	7.63638	7.04475	7.14649	7.66031	6.8568	7.80349	7.30864	7.28727	6.26671	7.43927	7.22649	7.44498	6.84398	7.53754	6.54538	7.42876	7.04832	6.04351	8.04712	6.894	6.84914	6.91959	7.93828	6.63275	7.90664	7.92465	7.22402	7.00394	7.82144	6.90911	7.71682	6.83454	7.72971	6.64229	6.44673	8.44809	6.77073	6.54218	8.89105	7.45684	7.71528	6.9478	6.80445	6.92781	6.0265	6.77619	7.25373
MDG1_LTR	3.00514	3.31812	3.93135	3.33281	3.09126	4.11147	4.19413	3.81524	3.5562	4.24804	2.7583	3.63137	3.49964	3.45431	2.96921	3.80544	3.31894	3.8097	3.49568	3.54311	3.9918	3.43832	3.71328	3.14713	4.26683	2.93179	4.53229	4.15503	3.30028	3.18202	4.13032	2.86918	4.00886	3.23603	3.31848	3.03877	2.34537	4.44179	3.11421	2.97279	5.01345	3.36946	3.91929	2.88204	3.39958	3.48853	1.9378	2.8687	3.31626
MDG3_DM	4.50512	6.46405	7.56503	5.27351	5.44878	6.14597	5.90248	5.78506	5.34026	6.42743	5.51714	9.4292	8.19929	4.41556	5.28293	5.49649	6.16978	4.78475	5.49347	4.73353	5.23192	6.52297	7.37894	5.35488	7.28391	5.34171	4.40561	5.5339	5.36394	5.39753	6.27413	4.83783	4.83842	4.51066	6.91675	5.12869	5.9473	5.9097	6.15499	4.81652	4.96524	4.93204	5.33088	4.17226	5.34375	4.56343	5.09767	5.10246	4.97627
MICROPIA_I	5.36496	7.45537	5.14697	6.93796	5.04534	5.09196	4.29439	5.42718	4.83351	5.5762	5.18389	5.72939	4.84432	6.75526	7.29546	5.26135	5.73878	5.77813	5.56464	6.18086	5.83089	4.67279	5.6547	9.43549	4.88023	6.41298	4.81806	5.2948	4.09974	7.805	4.9288	4.12761	5.15474	5.8194	4.72884	6.14677	4.65859	4.98639	5.82653	5.73619	5.57284	6.34966	5.52635	5.51322	5.20273	5.90447	6.365	6.67223	4.9649
MICROPIA_LTR	2.95	4.19746	3.01154	3.80025	2.61148	2.88988	2.09669	3.02683	2.46603	3.37911	2.56692	3.12722	2.66383	3.71414	5.06103	2.91365	3.24127	3.24697	2.66144	3.28636	3.24125	1.71648	2.94034	5.77624	2.98202	3.85253	1.9557	3.06671	2.13136	5.41413	2.78127	1.93882	2.46203	3.00747	2.41158	2.88626	2.05926	2.07007	2.79269	3.12248	3.1804	3.49644	2.98164	3.05631	2.43009	3.00118	3.24086	3.99836	2.25646
NOMAD_I	7.00946	5.13673	5.87682	6.88643	6.26599	6.99596	5.62167	6.3955	5.50486	5.94926	7.18865	5.48204	5.29686	7.09861	6.3359	6.48248	6.64614	5.35495	6.12956	5.98945	5.43705	5.92964	5.25445	6.23595	6.16398	5.52356	6.47593	5.10306	6.37639	5.92284	7.17243	5.30247	6.46866	6.62815	6.67829	6.60771	6.65706	6.01555	7.11149	6.05892	5.35706	6.22335	4.73938	6.50361	6.82141	6.98273	6.46958	6.24332	7.27083
NOMAD_LTR	4.10836	2.54542	4.06852	3.83704	3.68112	5.12087	3.61141	3.1808	2.66804	3.79275	3.99232	2.80592	2.90091	3.95989	3.73311	3.87109	4.25299	3.37521	3.57796	4.29719	3.27397	3.36982	2.44855	3.56538	3.46804	3.0707	3.69706	2.79412	3.48353	3.33793	4.8414	3.69985	3.61091	3.858	4.002	4.29748	4.35388	3.34408	4.01326	3.40521	2.86049	3.21834	2.07929	3.69441	3.92042	4.2356	4.36581	3.9225	4.4727
PLACW_DM	1.86503	1.96217	2.01009	1.96298	1.69399	2.05529	1.74334	1.66027	1.76434	1.99268	2.02654	1.66334	1.99582	1.84095	1.53159	1.86019	1.77055	1.95482	1.67722	1.72737	1.96062	1.79562	1.87187	1.80702	1.85688	1.87183	1.88042	1.98009	1.64973	1.68113	1.71941	1.76588	1.83721	1.75437	1.51158	2.01556	1.8319	1.86798	1.75892	1.67938	1.81988	1.86982	1.66771	1.67755	1.89488	1.80829	1.84872	1.77753	1.80055
POGO	6.05528	4.46187	3.6838	4.25523	4.49739	4.5038	5.22703	3.74291	3.92457	4.52867	3.59751	4.08529	3.4581	4.50844	4.9576	3.27726	6.39152	6.67951	4.38684	5.15084	5.23602	4.21615	4.42849	4.94503	3.48772	4.10618	3.78405	3.73811	4.88928	7.37525	4.25956	3.51768	4.96909	3.4732	4.08746	3.88375	5.68682	5.85185	5.89862	3.15111	1.80871	6.72597	3.57343	3.86319	3.15622	5.81527	4.09015	4.69852	3.8261
POGON1	0.686042	2.70406	2.54301	1.91222	2.73385	1.77629	1.08109	1.24996	1.44683	1.38221	1.70692	2.0416	0.13198	2.69687	3.00838	2.19251	0.921647	1.58491	2.66314	3.30415	2.8112	1.90179	2.25861	-0.24596	1.35521	0.587875	3.09439	1.58564	2.58707	1.494	0.339235	1.88718	2.39012	1.79181	1.55974	1.50039	1.99646	1.88634	2.15982	1.09442	2.19791	3.85508	2.78561	1.38719	0.88744	0.5592	1.01914	2.24048	1.5833
PROTOP,PROTOP_A,PROTOP_B	7.88005	7.82382	7.90794	7.86019	7.99886	7.87943	7.71508	8.32939	7.77542	7.94108	7.89504	7.70993	7.83324	7.92975	7.77023	7.82225	7.66866	8.05557	7.75362	7.73368	7.76683	7.77053	7.92315	7.92528	7.70448	7.77458	7.85692	7.94543	7.79703	7.74158	7.84729	7.67474	7.97563	7.91244	7.88154	7.84721	7.85612	7.95664	7.79699	7.83027	7.67019	7.8147	7.81138	7.86359	7.675	7.78555	7.79671	8.00403	7.82324
QUASIMODO2-I_DM	3.5019	3.39731	3.10892	3.44821	4.00945	3.61806	3.6135	3.83784	3.86463	3.28276	3.80376	4.00957	3.02389	3.9383	3.63903	4.45918	3.55801	4.01881	3.47791	3.51195	3.51394	3.45774	3.23167	3.04618	3.2329	3.29228	2.85497	3.25803	3.70629	4.09088	3.33881	3.49924	3.39401	3.4068	3.253	3.31405	3.40629	3.67573	4.80084	3.4888	3.39681	3.41369	4.36273	3.25766	3.31465	4.20012	3.03183	3.32238	3.94192
QUASIMODO2-LTR_DM	4.18604	4.27595	4.25558	4.26776	4.17113	4.29801	4.28163	4.05454	4.05586	4.13427	4.18141	4.19852	4.14834	4.48534	4.09601	4.25239	4.19183	4.38157	4.16614	4.24858	4.19789	4.16984	4.09274	4.24016	4.20559	4.25729	4.27516	4.35155	4.22865	4.30374	4.21547	4.32641	4.24815	4.08627	4.06292	4.31054	4.46951	4.35824	4.30739	4.07658	4.08781	4.12042	4.26712	4.28109	4.25673	4.43415	4.17802	4.19341	4.10312
QUASIMODO_I	6.40391	6.16174	6.19031	5.91693	6.33867	6.26435	6.1653	6.39745	6.33654	6.16225	6.34554	6.24328	6.09996	5.88569	5.97673	6.49686	6.62962	6.36378	6.36017	6.78231	6.37777	6.51292	6.69756	6.51162	6.54633	6.10339	6.11107	6.63067	6.32906	6.07621	6.29695	6.47295	6.48744	6.19184	6.32436	5.97492	6.0655	7.06323	6.44177	6.5499	5.92691	6.6208	6.28321	6.1194	6.07111	6.35663	6.35527	6.41452	6.36844
QUASIMODO_LTR	4.58875	4.33083	4.36388	4.09487	4.44275	4.41153	4.09338	4.70077	4.48584	4.15369	4.34436	4.46352	4.37709	4.45705	4.2845	4.4938	4.79463	4.68797	4.34089	4.84526	4.50185	4.53364	4.69086	4.52265	4.62042	4.02096	4.08435	4.54523	4.32319	4.70134	4.14063	4.67093	4.4195	4.55253	4.259	4.49465	4.45994	4.82897	4.19166	4.48696	4.51993	4.52167	4.53051	4.25814	4.25779	4.59126	4.70741	4.09155	4.99926
R1_DM	6.10629	6.54867	6.04111	8.49259	7.09008	6.49573	6.16925	6.09124	6.66734	7.40387	7.66909	7.03428	7.28786	6.20681	6.5949	6.85857	6.92781	6.95392	6.32857	5.77745	6.07299	6.97543	6.33625	6.46112	8.18137	6.85331	7.19808	6.97893	6.70619	7.42615	8.71695	6.49668	8.71257	6.47052	5.90918	6.48867	6.49916	6.41946	8.44318	6.73142	9.29518	7.34108	9.27182	8.03718	6.54372	7.10529	9.422	6.5363	7.57201
R2_DM	6.57857	5.70497	9.49809	10.3224	5.52401	5.11935	8.57385	6.80925	8.42095	5.75719	5.66598	6.50476	6.50278	8.26043	7.76812	4.04018	8.77301	7.19394	4.93389	9.67526	9.259	4.37298	4.5305	7.35839	8.10648	4.55642	5.97601	6.42634	7.28125	7.56938	3.94441	8.65152	8.33914	4.58264	7.1981	8.65098	7.51224	5.43573	8.20755	6.05694	8.42341	9.173	10.687	8.60245	5.9832	9.99188	9.12975	7.98319	8.04629
ROOA_I	7.35774	7.44198	7.5992	7.37448	7.32251	7.18233	7.37308	7.00322	7.17274	7.13974	7.5154	7.14453	7.51857	7.4268	7.13088	7.25717	7.29533	7.18723	7.38945	7.32726	7.11128	7.23265	7.16209	7.68192	7.40943	7.04841	7.39193	7.3883	7.30835	7.13347	7.29372	7.22865	7.53754	7.40948	7.39334	7.47188	7.25773	7.222	7.34986	7.46922	7.27362	7.35106	7.08692	7.34556	7.08039	7.20104	7.42425	7.17667	7.38175
ROOA_LTR	4.97862	5.05472	4.89175	5.18915	4.76101	4.89667	5.11325	4.71258	4.63781	5.08704	4.78679	4.57801	5.0026	5.30314	4.66472	5.00243	4.94104	4.71225	4.56839	4.78677	4.59877	4.87853	4.68175	5.19381	5.04775	4.55164	4.98843	5.04866	5.17866	4.88155	4.67595	4.85965	5.14318	4.71265	4.84884	5.0654	4.65818	4.76668	4.91733	4.58266	4.75079	4.96285	4.90683	4.79184	4.63523	4.42313	4.99234	4.69841	5.02453
ROO_I	9.7265	9.87214	10.187	9.92661	10.0542	9.99791	9.89633	9.67654	10.0151	9.92445	9.87039	9.68727	9.81364	9.66387	9.66503	9.77568	9.89735	9.49422	9.4833	9.12013	8.84978	9.69229	9.53443	9.0621	9.88648	9.95146	9.59724	10.404	10.3016	9.48858	9.85337	9.95264	10.5697	10.0864	9.36772	9.93819	9.72403	10.0836	9.97835	10.266	9.92549	10.6869	10.2717	10.3514	10.6774	10.3899	10.444	9.86408	9.83488
ROO_LTR	5.98085	5.6284	5.71804	6.14741	5.80198	5.80232	6.41755	6.07008	5.53014	5.88801	5.75694	5.59571	7.42193	6.09006	5.57219	5.5533	5.71751	5.49781	5.62406	5.74322	5.65616	5.58357	5.71953	5.55944	5.90689	5.8649	5.8407	6.16889	5.99381	5.75979	5.66876	5.82346	6.56249	5.92863	5.79021	5.95591	6.02651	5.93608	5.84965	5.92322	5.81629	6.26424	5.81674	5.74376	5.85656	5.96385	5.91453	5.53146	5.63864
ROVER_DM	4.81408	5.33585	4.87256	4.92336	5.33755	5.73364	5.43758	5.52765	5.56936	5.16864	5.59836	5.25599	6.06328	4.76657	5.0784	5.62281	6.03239	5.23483	5.03986	5.65056	5.17766	5.63033	5.07956	4.92892	4.83693	5.58029	6.31245	6.18697	5.70755	5.97531	5.11181	5.26028	4.65022	5.34729	5.62789	5.39266	5.20871	5.80754	6.5115	5.34392	4.36747	5.1923	5.12284	5.37633	5.47251	4.90596	5.01609	5.33105	5.52257
RSP	-0.511927	-0.328407	0.0312566	-0.190215	-0.723389	-0.267507	-0.294589	0.311566	-0.124474	-0.622867	0.0200566	0.526892	-0.376526	-0.312002	-0.265546	-0.195149	-0.0789646	-0.635665	-0.212655	-1.1351	-0.196501	-0.163994	-0.192014	-0.279207	0.123095	0.00395178	-0.452259	0.0493128	0.189721	0.0658142	0.155407	0.149123	-0.176013	-0.743683	0.13574	-0.428511	-0.199003	-0.173657	-0.212102	-0.757491	-0.780021	-0.49422	-0.270539	-0.652549	-0.282522	-0.129339	-0.668642	-0.258525	-0.0169367
S2_DM	3.33494	3.47073	3.20845	3.60747	3.21418	3.51312	3.20971	3.31911	3.24277	3.5702	3.44558	3.30469	3.39984	3.58547	3.28032	3.54711	3.20083	3.45077	3.5415	3.29559	3.3879	3.42513	3.43838	3.48751	3.44282	3.40513	3.30776	3.52671	3.42323	3.38436	3.57225	3.37904	3.55751	3.48575	3.25977	3.33727	3.41846	3.39076	3.16746	3.44025	3.51779	3.34118	3.33475	3.32629	3.33303	3.42233	3.46598	3.39497	3.64284
SAR2_DM	3.10821	3.43936	3.83458	3.14593	3.91992	3.60905	3.56928	3.40408	3.52439	3.85718	3.15666	3.10318	3.18288	3.63025	3.66167	3.66339	2.95264	4.10935	3.30325	2.86328	3.41106	3.37852	3.04867	3.24127	3.1277	3.27443	3.24606	3.44744	3.29791	4.05887	3.57642	2.91561	3.77049	3.24694	3.92097	3.60462	3.46271	3.6728	3.77075	3.78248	3.19035	3.15281	3.54046	3.35008	3.35941	3.42405	3.31441	3.39855	3.39964
SAR_DM	5.33234	5.27791	5.29961	5.14788	5.67679	5.33565	5.31965	5.52766	5.28158	5.3284	5.45374	5.2694	5.3239	5.30786	5.14265	5.35057	5.42501	5.36136	5.10828	4.91518	5.33081	5.27766	5.20852	5.06304	5.1484	4.96217	5.10808	5.32396	5.22642	5.50125	5.36311	5.24294	5.29377	5.24413	5.46901	5.28742	5.24431	5.21664	5.32237	5.08626	5.1483	5.10251	5.39257	5.23779	5.47753	5.2226	5.09502	5.34072	5.30184
S_DM	5.42118	5.83301	5.75725	5.63887	5.85105	5.71049	6.06693	5.95319	5.69354	6.63956	5.9724	5.89257	5.83018	7.06382	5.89536	5.7829	5.79796	5.92436	5.79602	5.79078	6.0669	6.2176	5.78314	6.01289	6.03781	5.69415	6.02106	6.23871	6.07838	5.95969	5.91192	5.81371	6.12022	6.08664	6.55713	6.12633	6.27459	5.92594	6.36987	5.78342	6.66139	5.63336	6.17196	5.46606	5.68117	5.87152	5.87686	5.80322	6.64905
STALKER2_I	6.82794	6.04712	7.3531	5.9703	6.80657	8.42505	5.85095	5.86486	7.69855	7.05349	6.40532	5.91463	8.3083	5.62732	7.47252	5.21584	6.93745	5.71446	6.67764	6.70295	5.25141	8.66287	6.52539	6.81404	5.36994	6.23959	5.65903	7.0002	5.44709	6.9788	6.75746	6.97872	6.68854	5.97548	5.35794	6.73179	5.37982	7.65855	5.27493	7.37221	7.11516	6.44316	8.69791	7.22388	6.54476	5.45014	7.79405	6.23572	5.30216
STALKER2_LTR	3.52524	2.64296	3.79057	2.81434	3.71249	4.20803	2.49493	2.54578	3.43906	2.79648	3.39533	2.53351	4.18087	2.24378	3.24962	2.30591	3.92409	2.72806	3.46313	3.32617	3.01357	4.22741	2.68377	3.31232	2.24924	3.01383	2.86475	3.21345	2.52629	3.21392	2.90087	3.17752	3.56965	2.69344	2.61883	3.79776	2.6127	4.09584	2.55225	3.41423	3.55411	3.86815	4.60567	3.54288	3.08067	5.60852	4.95954	2.85627	1.27113
STALKER3_LTR	0.429739	0.632685	0.956488	0.870451	1.10084	0.788836	1.14349	1.0064	1.01904	0.906301	0.988339	0.918145	0.825788	0.987919	0.818775	1.00921	0.708589	0.926992	0.684202	0.737382	0.957798	0.605667	0.961359	0.758693	0.712827	0.689793	0.816263	0.653712	0.785783	0.864604	0.384673	0.667671	0.58975	0.788189	1.1455	0.801309	1.02498	0.776013	1.03334	0.291793	0.770924	0.587449	0.871546	0.727574	0.868795	0.746755	0.443454	0.648623	0.951294
STALKER4_I	7.0973	6.82304	7.60611	7.25486	7.75095	6.82843	7.23717	7.2599	7.53889	7.74987	7.50099	7.09646	7.39804	7.56882	7.07033	7.38419	7.44859	7.49925	7.72568	7.57036	7.1686	7.46173	7.34892	7.6856	7.13899	7.53078	7.52195	7.10781	7.51878	6.94746	6.72726	6.96501	6.96678	7.38467	7.09901	6.74408	6.89728	7.70534	7.23805	7.20895	7.47173	7.00863	7.27785	7.25613	7.4732	7.10146	7.2275	6.70581	7.16627
STALKER4_LTR	4.0937	3.82321	4.18676	4.38203	4.36093	3.82109	4.14836	4.28508	4.27187	4.53554	4.27406	4.05999	4.2646	4.44717	3.95975	4.22431	4.08716	4.32326	4.23532	4.30961	4.03314	4.21274	4.12579	4.46994	4.10042	4.24778	4.43724	4.1433	4.49158	3.9106	3.91407	3.98664	4.14097	4.21138	4.10761	3.66294	3.87874	4.30079	4.43781	3.93302	4.30129	3.97635	4.16207	4.03489	4.30222	4.12565	4.20415	3.83167	4.22751
TABOR_I	6.01442	5.12195	6.59841	4.36946	5.67499	5.80323	4.49345	6.28678	7.90798	5.54472	6.2718	4.46571	7.30263	6.22037	4.95747	6.48843	4.32478	4.75506	5.55485	5.11778	5.51164	5.27586	6.08504	5.2987	5.66624	5.00673	4.7691	5.79289	6.40403	6.11832	7.73212	5.35974	5.96843	6.1261	5.9524	4.99558	5.17364	5.91187	6.68631	10.164	5.53119	5.42123	6.40476	7.06411	5.00695	5.41708	4.74023	5.95667	6.06941
TABOR_LTR	2.51167	1.68662	1.40921	1.44001	1.62374	2.10114	1.96694	3.03358	3.2094	2.1434	1.62923	1.36362	2.60918	2.46871	0.845783	3.44055	-0.172546	1.22969	1.56831	2.48929	2.69891	2.23277	1.9847	2.41288	1.52442	1.47056	1.5194	1.4025	1.56972	2.26915	3.13579	2.11853	2.05688	2.68925	3.36053	1.56001	2.92169	1.49348	2.1654	5.28158	2.56955	1.42742	2.12811	4.48044	2.35677	2.34523	1.79693	2.35032	2.05415
TAHRE	4.67524	4.84387	4.96487	4.72428	4.61776	5.22704	4.39891	4.79964	5.07156	4.7985	3.26141	6.32674	5.00057	5.36096	4.66306	3.97467	4.97509	5.09885	4.39237	4.93045	4.21593	4.88098	5.60664	5.32997	4.56032	4.95459	4.52041	5.09753	4.92086	5.10178	5.46707	4.73359	5.11673	5.21742	4.89462	5.56926	5.43097	4.85726	4.99131	5.07432	4.22455	5.08929	5.05758	4.84353	4.82138	4.99195	5.11296	5.91531	4.07385
TART-A	6.37311	6.80198	5.33811	5.83791	6.86216	6.95556	6.1703	5.46921	6.42328	5.63103	5.08095	7.43884	5.74427	6.78454	6.63037	5.3607	5.33762	6.61941	5.76431	7.67128	6.12077	7.25975	6.66468	6.88939	5.46565	7.36973	5.03295	6.61868	4.418	6.44451	6.71271	5.91716	6.18769	5.1262	6.80445	6.36572	5.38982	6.1142	7.2154	6.22195	5.87931	5.61771	5.83308	7.58582	6.5003	6.98324	5.91401	5.89106	5.2436
TART_B1	2.91326	5.8399	5.40034	5.53327	5.28923	5.50967	5.15116	5.02553	5.5571	4.98573	5.12125	6.46719	5.16027	5.75016	5.87611	4.42531	5.63808	6.02586	3.77855	7.08563	4.66858	5.93906	6.29002	6.07438	4.54127	6.35245	3.11685	5.27445	3.01184	5.91176	5.11649	7.3641	8.54938	5.57409	4.61244	5.97795	6.83467	4.75165	4.16354	5.77764	4.47154	4.08344	5.46858	5.86699	6.53153	6.68472	5.74796	7.0328	4.4812
TC1-2_DM	6.08056	5.93783	6.03114	5.76833	5.70601	5.89796	6.01025	5.71268	5.96021	5.68577	5.95198	5.76398	5.95691	5.97961	5.76621	5.95521	5.75258	6.09482	5.88699	5.95363	5.79728	5.81405	5.94017	5.98286	5.71131	5.72629	5.99812	6.07666	5.96105	5.59593	5.90691	5.72097	6.11771	6.02982	5.97236	5.81229	5.85054	5.89492	5.94923	5.8974	5.53708	5.85609	5.81421	5.86244	5.79182	5.89455	5.76053	5.80695	5.84708
TC1_DM	5.31079	5.30257	5.25227	5.2889	5.24627	5.4216	5.21331	5.21671	5.26138	5.35801	5.30502	5.18165	5.24224	5.35799	5.19108	5.14216	5.17168	5.34961	5.20276	5.31124	5.17706	5.18628	5.32459	5.3225	5.24629	5.14236	5.32191	5.45033	5.27139	5.3635	5.3217	5.21016	5.34734	5.33553	5.33857	5.3677	5.28897	5.35759	5.26614	5.22343	5.22318	5.1872	5.26171	5.28335	5.14594	5.29314	5.2983	5.44874	5.23122
TIRANT_I	5.44112	5.98626	5.08015	5.44837	7.01335	4.07909	4.82059	6.29865	4.87042	5.23711	5.10049	5.66987	4.69911	6.15076	5.2401	4.63125	4.84788	5.51256	5.13777	5.245	5.71074	5.17139	5.20419	6.98876	4.20214	5.95005	4.81859	5.59022	5.53705	5.96614	4.61633	4.59874	6.57262	5.61396	4.93575	5.86775	5.04749	5.39075	5.30833	4.87548	5.34283	5.2949	5.03654	5.41669	5.60948	5.41619	6.08884	6.76583	5.22419
TIRANT_LTR	2.16054	2.96363	2.70654	2.82377	4.2456	0.622498	3.06967	3.76502	1.95119	3.13043	2.36396	3.31016	2.29485	3.43332	3.16103	1.70756	2.05393	2.88309	2.49972	2.9013	4.10467	2.21776	2.4151	4.36978	0.758841	3.53325	1.72766	2.95865	2.48115	3.19636	2.28176	1.2268	3.89955	3.38386	2.6554	2.87237	2.58324	2.59772	2.64638	2.58626	2.78753	2.71178	2.41455	2.79238	3.61636	3.70623	3.24407	3.89103	1.77655
TLD2	1.04447	1.18497	1.18862	0.740468	1.49057	0.94932	0.444151	1.3647	0.996614	0.940681	1.0311	1.21489	0.971012	1.26211	0.772881	1.05119	0.482882	1.11376	1.08321	0.986667	0.926328	1.05576	1.05932	1.02901	0.8281	0.977102	1.14541	1.14226	0.978879	1.13357	0.962962	0.874358	1.08678	0.921895	1.26258	0.739945	1.18439	1.3321	1.22019	1.06293	0.809342	0.94261	0.923889	1.03251	0.830372	0.730799	0.864492	0.770755	0.866838
Transib1	2.9717	3.15917	2.8029	2.86788	2.60137	2.99016	2.88138	2.77011	2.94079	2.9661	3.17515	2.5154	2.81282	3.01315	2.81447	2.86692	3.16327	3.01203	3.18002	2.75774	2.55506	2.47705	3.31272	2.91509	2.91582	2.78565	2.93507	3.22388	3.01589	2.89843	2.94999	2.74249	2.88717	2.96059	2.92421	3.24603	2.95414	3.21211	2.9841	3.1481	2.44258	2.92811	2.66478	2.78974	3.08575	2.90306	2.69934	2.91037	2.85738
TRANSIB2	5.60657	5.5644	5.46769	5.577	5.2203	5.62977	5.27247	5.58936	5.47384	5.66987	5.68632	5.51604	5.44222	5.55682	5.43875	5.3861	5.43318	5.57215	5.61971	5.4593	5.51526	5.18708	5.46918	5.79508	5.55322	5.53729	5.58342	5.50932	5.41067	5.44771	5.54914	5.57509	5.68734	5.60193	5.68931	5.66442	5.55752	5.5778	5.28966	5.61744	5.1837	5.59402	5.37337	5.39433	5.44993	5.29772	5.48922	5.64388	5.43349
TRANSIB3	4.52927	4.86898	4.69676	4.55247	4.49892	4.48794	4.68287	4.32307	4.61659	4.32797	4.21334	4.74808	4.74749	4.17637	4.5516	4.07978	4.33162	4.59648	4.56345	4.84318	4.31695	4.47349	4.52643	4.81282	4.84404	4.48017	4.68827	4.43127	4.27639	4.70744	4.33579	4.3709	4.80386	4.50203	4.32395	4.21236	4.23685	4.45578	4.47827	4.59826	4.60144	4.44648	4.66923	4.65829	4.68838	4.30167	4.53928	4.70366	4.81799
Transib4	3.3853	3.40799	3.24852	3.36008	3.1141	3.46533	3.16604	3.16081	3.28832	3.20461	3.43691	3.20378	3.33726	3.61084	3.37265	3.50838	3.20241	3.45031	3.33503	3.41533	3.34485	3.14195	3.54112	3.40078	3.26815	3.27449	3.48526	3.54648	3.45138	3.05822	3.43385	3.44485	3.62352	3.48656	3.44162	3.30632	3.49901	3.50877	3.27855	3.45668	3.15946	3.92043	3.42308	3.34267	3.21892	3.39981	3.30192	3.44522	3.36631
Transib5	3.60392	3.5793	3.52546	3.35536	3.18444	3.94525	3.74977	3.17731	3.93009	3.39016	3.42686	3.21704	3.89774	3.63857	3.46267	3.732	2.96806	3.88223	3.35856	3.09167	3.332	3.49767	3.44771	3.4154	3.60032	3.14898	3.4678	3.34037	3.54919	3.25983	3.53943	3.82131	3.39466	3.56797	3.28931	3.48473	3.33724	3.33119	3.89779	3.25935	3.88526	3.49565	3.51088	3.27984	3.71506	3.43506	3.0102	3.65902	3.24749
Transib-N1_DM	0.701553	0.406259	0.741666	0.713087	0.656	1.00028	0.683185	0.660879	0.446931	0.821369	0.48257	0.319519	0.413875	0.872461	0.537881	1.93728	0.814764	0.513963	0.776842	0.361398	0.471732	0.292453	0.721897	0.672885	0.534885	0.560699	0.618001	0.561481	0.602963	0.700106	0.604746	0.629841	0.75921	0.289101	0.647558	0.891526	0.763592	0.763833	0.585969	0.846492	0.738895	0.591334	0.671557	0.7381	0.806613	0.782262	0.73604	0.748116	0.515281
TRANSPAC_I	6.94135	8.94737	8.87431	6.33001	7.29787	7.23012	6.68244	7.10351	8.80731	7.1758	8.46754	9.13338	8.94022	6.50137	9.06294	7.70597	8.24127	8.80687	9.72249	7.33323	9.01051	9.17343	8.07967	8.90577	9.10492	8.11478	9.19869	8.2608	8.13081	7.14311	7.84074	7.82117	9.01085	8.63767	7.74807	6.64208	6.73345	5.65499	9.03514	8.07022	8.51531	7.20335	8.41781	9.12832	7.10298	7.72089	9.66935	8.16653	8.02864
TRANSPAC_LTR	3.27625	4.40935	4.19168	3.31698	3.36879	3.10825	4.04668	3.6136	4.36034	3.12305	4.15021	4.86972	5.0103	3.67572	4.51804	3.50311	3.84222	4.41517	5.04429	3.60062	4.89665	4.41278	3.87563	4.80478	4.61195	4.53599	4.95512	3.88845	4.01413	3.14217	4.1815	3.76345	4.39622	4.87609	4.24687	3.45784	3.35541	2.24957	4.20816	3.68941	4.40186	3.53167	4.03134	4.71637	3.54301	4.23495	5.26838	4.31463	3.91228
XDMR	1.36343	1.90327	1.62408	1.67646	1.3689	1.83221	1.68189	2.07363	1.78693	1.78622	2.07397	1.60328	1.2793	1.6789	1.3416	1.6256	1.65933	1.67053	1.68499	1.48341	1.86823	1.86754	1.68183	1.5471	1.68568	1.35929	1.46624	1.81166	2.02301	2.05265	1.45201	1.63111	1.80843	1.84996	1.85223	2.12881	2.06045	1.86544	1.45728	1.39797	1.51996	2.2216	1.45936	1.90434	1.78325	1.75066	1.79489	1.70412	1.8342
ZAM_I	2.50551	4.67013	2.92626	2.33804	2.99996	3.02624	3.39734	3.27032	2.85399	3.70268	3.08302	3.02825	2.59008	2.69728	3.05878	3.16858	3.23726	2.94428	3.11422	2.58519	3.01907	3.02175	2.9452	2.42324	2.69698	2.50422	2.68395	2.95466	3.4664	3.58135	2.92083	3.12655	2.8806	2.21154	2.91154	2.61949	2.79457	2.7061	3.15788	2.3406	2.45478	2.97276	3.00827	3.04669	2.89526	3.33305	2.79793	3.86236	3.60575
ZAM_LTR	0.13893	2.55148	-0.652133	-0.198758	0.46084	-0.415376	-0.280478	-0.0203487	0.421822	1.28246	-0.261882	-0.637281	1.46419	0.361954	1.93293	0.339397	-0.0435659	0.32764	-0.345918	0.425987	-0.290835	2.34154	-0.345798	-0.273486	-0.30879	0.822715	-0.496974	-1.09458	-0.786104	1.60479	-0.132254	0.106262	-0.135849	0.581326	0.642582	-1.01155	0.359741	0.143174	-0.605578	0.226175	0.64246	-0.573028	-0.549971	2.77778	1.60005	0.890465	0.295842	1.03639	0.024435
[truncated: 151 more columns]

## Sheet: Table S6G
RepBase Sequence ID	100_M_mean	101_M_mean	105_M_mean	109_M_mean	129_M_mean	136_M_mean	138_M_mean	142_M_mean	149_M_mean	153_M_mean	158_M_mean	161_M_mean	176_M_mean	177_M_mean	181_M_mean	189_M_mean	195_M_mean	208_M_mean	217_M_mean	21_M_mean	223_M_mean	227_M_mean	228_M_mean	229_M_mean	233_M_mean	235_M_mean	237_M_mean	239_M_mean	256_M_mean	26_M_mean	280_M_mean	287_M_mean	28_M_mean	301_M_mean	303_M_mean	304_M_mean	306_M_mean	309_M_mean	310_M_mean	313_M_mean	315_M_mean	317_M_mean	318_M_mean	319_M_mean	31_M_mean	320_M_mean	321_M_mean	324_M_mean	325_M_mean
ACCORD2_I	4.83097	5.01895	4.72696	5.01182	4.5182	4.95441	4.50495	4.88562	5.38174	4.88885	4.76506	4.86351	4.69473	4.39452	4.92907	4.8205	4.82715	5.06872	4.87099	5.03957	5.07203	4.78943	4.71812	4.76393	4.86188	4.92452	5.19814	5.09278	4.74137	4.70474	4.7836	4.49257	5.08034	4.76795	5.19435	4.89881	5.07057	4.63325	4.79633	4.75107	4.91991	4.7054	4.54493	4.65934	4.87206	4.50816	5.0902	4.8762	4.57657
ACCORD2_LTR	0.575443	0.561224	0.0847465	0.308433	0.599739	0.51322	0.489895	0.216873	0.390139	0.561246	0.168254	0.788193	0.169184	0.280423	0.376624	0.752351	0.353697	0.500333	0.580951	0.618332	0.230416	0.383103	0.534188	0.39166	0.310689	0.433616	0.571535	0.360487	0.151517	0.501503	0.315559	0.232219	0.450077	0.348866	0.448605	0.549784	0.297448	-0.0111218	0.428426	0.274815	0.495706	0.262944	0.425592	0.459456	0.319194	0.17193	0.521012	0.309512	0.547989
ACCORD_I	6.663	6.4368	6.39784	6.40626	5.91177	6.41953	6.03413	6.43212	6.57489	6.21674	6.54073	5.18065	4.67739	5.85658	5.59961	6.16259	5.49813	6.79618	5.67945	6.03968	6.63977	7.00847	5.80926	6.69867	5.23015	3.39138	5.57325	6.47628	5.58359	6.91182	6.56938	6.90044	6.01873	6.10146	6.70343	7.24483	6.76001	6.54964	5.76871	5.29634	5.61282	6.40661	6.48165	5.33584	5.16201	5.30338	6.10308	6.53721	5.30381
ACCORD_LTR	2.7546	1.69087	1.9713	2.58571	2.00436	1.87866	2.38912	1.98594	2.00953	2.00066	2.0481	1.64442	1.1471	2.45545	1.66421	2.59164	1.40391	2.75695	1.2232	2.37993	2.33013	2.94696	1.84693	2.23166	1.57332	1.17308	1.6286	1.98081	1.68641	2.55279	2.64872	2.37783	1.6065	1.86461	2.68736	3.5213	2.54023	1.98723	2.05776	1.87419	2.31222	1.74055	2.25904	1.90205	1.7606	1.90755	2.05318	2.14725	1.27882
ARS406_DM	5.28801	5.18673	5.31392	5.34457	5.62609	5.70945	5.57443	5.39153	5.36029	5.66297	5.32868	5.37186	5.37273	5.30948	5.63609	5.14009	5.63375	5.61311	5.60836	5.43536	5.26433	5.38743	5.3444	5.49793	5.31454	5.26976	5.41522	5.28555	5.71426	5.72313	5.44518	5.30938	5.56781	5.2532	5.49007	5.70403	5.3935	5.34786	5.67933	5.20628	5.47392	5.27651	5.49404	5.59073	5.31796	5.47623	5.30004	5.46985	5.50812
BAGGINS1	6.5949	6.6366	6.65509	6.59736	6.7669	6.67204	6.49767	6.51361	6.5307	6.65025	6.62608	6.71508	6.74113	6.4405	6.72057	6.67115	6.52493	6.71339	6.67276	6.52877	6.64888	6.48443	6.56845	6.59062	6.65324	6.32687	6.76256	6.73457	6.55756	6.73347	6.40706	6.72532	6.62604	6.55003	6.64154	6.65532	6.72343	6.62942	6.59069	6.53504	6.70111	6.54915	6.66789	6.56014	6.64611	6.58197	6.69023	6.55517	6.44308
BARI_DM	3.99678	3.35231	3.88935	3.20341	4.93955	3.56318	3.81655	4.01124	2.89921	6.18554	6.03844	2.9282	2.6109	4.14895	3.14304	3.48683	3.34302	3.12319	5.72826	4.26347	2.89577	3.46141	5.95858	3.0609	4.11664	3.12261	4.13213	2.83267	3.82299	3.47637	4.55066	3.43513	3.50503	2.68219	2.81559	3.12996	2.7255	3.2541	4.76534	3.46031	3.7931	4.45342	3.62421	5.56199	3.10526	3.52613	3.18594	4.48842	3.68039
BATUMI_I	7.32042	7.08749	7.07763	7.0115	7.4384	7.11233	6.81825	6.90781	7.02633	7.19799	7.50066	7.38889	7.50544	6.87369	7.38095	7.37877	7.04382	7.57023	7.56524	7.0458	7.28313	7.14969	6.70608	6.83959	7.1682	7.13916	7.32079	7.41974	7.0517	7.34585	6.89784	7.24332	7.22058	7.07993	7.1707	7.18849	7.16009	7.02768	7.0043	6.96334	7.26582	6.88772	7.12365	6.90447	7.50464	6.95053	7.02585	6.97403	6.8585
BATUMI_LTR	1.78747	2.01224	2.25023	2.02305	2.02786	1.85026	1.9301	1.829	1.95409	2.33042	2.06265	2.08013	2.44778	2.22769	2.06012	2.19406	1.63169	2.00747	2.29662	2.33277	2.08441	1.6264	1.52861	1.68161	1.97636	2.22679	2.17446	2.00269	1.73872	2.1639	2.10595	1.32683	2.04632	1.96726	1.98319	1.46202	2.2844	2.31637	2.15728	1.63353	2.2175	1.72143	2.09734	1.70007	2.33885	2.2955	2.04004	1.83128	1.68957
BEL_I	5.43696	6.82487	5.2528	6.17945	5.17474	5.64738	6.93465	6.49644	4.41214	6.76711	6.36636	5.84386	7.96345	7.52022	4.95584	5.51214	6.31347	7.14719	4.74902	6.66286	7.36891	5.71994	5.033	6.82894	4.66798	5.93062	7.44596	6.06075	6.80515	5.33286	6.47031	6.2315	6.60271	6.27856	5.89449	5.76742	4.72167	6.27412	5.9711	4.66843	6.70222	5.48621	5.8994	7.80334	6.32559	7.22219	5.77846	6.84705	6.89655
BEL_LTR	0.954412	3.02408	1.323	1.73352	0.934025	1.60743	2.58367	3.11457	0.464151	2.19239	1.43103	1.56683	2.60005	2.7929	0.596975	1.75534	2.17232	1.62906	0.967775	2.66073	1.99629	1.21333	0.718619	1.88275	0.907138	1.37153	2.18086	1.6431	1.86559	1.08089	1.31467	1.32637	1.69903	1.88549	0.676484	0.998852	-0.524058	1.33953	0.897943	0.714713	2.28506	1.61453	1.63295	2.76347	1.64039	2.24171	1.60762	1.98232	2.33883
Bica_I	3.98754	4.29588	3.67468	3.86557	4.27853	3.7365	3.82362	3.91171	3.78179	3.82913	3.89841	4.10933	3.66415	4.40977	3.92923	4.1497	4.03656	3.57893	4.02851	4.53566	4.06298	3.67086	4.12104	3.95474	4.06626	4.39355	4.05764	4.21194	3.93344	3.81574	3.98069	4.1635	4.6643	3.74381	4.00514	4.02814	4.11641	3.6895	4.51001	3.97169	4.14463	3.95727	4.15825	3.9843	3.76433	3.42958	4.33606	3.71956	3.35656
Bica_LTR	0.258016	0.0660184	0.109564	0.127797	0.151974	0.0294637	0.0185089	-0.0711443	0.0515088	0.113355	-0.0277469	0.022084	-0.0473991	0.154159	-0.0335293	0.0313892	0.135896	0.0850042	-0.106061	0.422872	0.249774	-0.0813566	-0.00789215	-0.12296	0.100615	0.0421851	-0.0407259	0.165439	-0.0717743	0.120131	0.0399501	0.0585055	0.19345	-0.278711	-0.0265691	-0.0979671	-0.0126162	-0.218247	0.151889	-0.0989288	0.0255597	0.173186	0.0459444	0.247275	-0.0614558	-0.135321	0.08682	0.010566	-0.0962477
BLASTOPIA_I	7.20654	6.55444	9.35569	6.09718	6.51876	7.75797	6.5736	10.1435	5.85534	7.51139	5.80196	7.22792	7.62581	8.62312	8.6454	7.8004	5.75398	7.76937	6.24143	6.21327	7.37819	9.12278	7.81345	7.07929	6.98647	7.38188	6.17029	6.20884	6.79123	6.15612	9.02364	7.36033	7.34428	8.33706	7.28596	7.29299	7.40698	9.47387	6.97019	6.11123	6.65827	5.74314	7.24623	6.60757	6.76908	6.7916	5.48584	7.51978	7.16821
BLASTOPIA_LTR	3.81187	3.28001	5.28423	2.36626	3.1325	4.06447	2.81522	5.4652	2.62268	2.85619	2.1948	3.58219	4.14345	3.69538	5.46913	3.9175	1.80984	4.65491	2.93338	2.93902	3.28492	5.23144	4.1564	4.53184	3.65343	3.68251	2.61636	2.76741	3.57015	2.30946	5.32177	3.61929	3.34787	4.1251	4.65673	3.48239	4.2092	5.1564	3.2153	3.84354	3.6974	2.10467	3.48515	3.1025	4.39985	3.19894	2.87552	3.86113	2.54282
BLOOD_I	8.33773	7.89527	7.7654	7.03243	6.06165	8.27736	7.36319	7.05703	6.77082	6.03855	7.29891	6.48041	6.48066	8.04948	7.40456	6.52523	6.76914	6.62928	7.02598	6.82483	5.99966	7.75504	7.97838	7.53865	7.76965	7.46166	7.92329	7.4931	10.1785	7.94264	6.87037	7.14215	7.44778	7.79201	6.59105	7.85493	7.06692	6.85394	8.43651	8.41328	7.99661	7.89311	10.1209	6.82777	7.42413	8.09285	7.0662	8.49421	7.52494
BLOOD_LTR	3.77961	3.30828	3.03289	2.93355	2.1578	3.2861	3.5816	3.13185	2.33399	2.46288	3.60753	1.94562	2.92834	4.44535	3.99116	2.93944	1.90942	2.59315	2.02961	3.18903	2.88868	2.99251	3.67026	3.03014	2.85288	4.21014	3.22425	2.80391	6.60051	3.43231	2.68781	3.17642	3.45617	3.64922	3.34135	3.28205	3.40008	3.179	3.16526	3.82937	3.89278	2.9335	4.85156	3.30112	3.61309	3.52261	3.01555	4.47864	3.23456
BS	5.67189	4.68028	4.88998	4.64165	4.40519	4.55964	5.34429	3.54017	3.57095	7.23068	5.05081	3.98768	7.96187	5.9194	4.72829	5.101	6.11351	5.84895	5.76349	5.23755	6.27793	3.4693	5.84118	4.8788	5.18813	7.1354	4.65529	4.45041	3.9672	4.97765	7.93651	5.08273	6.6913	5.61308	5.81162	4.42692	5.36782	4.6559	3.92145	4.8988	7.20144	3.74552	6.08946	5.43525	5.62128	5.84416	7.49776	7.20075	5.61729
BS2	5.62933	5.41699	5.66443	5.54809	5.76332	5.74618	5.38788	5.45725	5.64226	5.38586	5.66723	5.73701	5.71282	5.37051	5.34008	5.80669	5.50388	5.65279	5.59711	5.65276	5.58438	5.51669	5.57811	5.54524	5.66121	5.39308	5.62679	5.6165	5.52381	5.42574	5.30435	5.67787	5.60548	5.69429	5.49794	5.59118	5.65264	5.68423	5.50773	5.40448	5.66746	5.4486	5.78904	5.60428	5.51524	5.70752	5.58247	5.81923	5.60662
BS3_DM	3.39664	3.35157	3.41122	3.26185	3.50077	3.43751	3.38958	3.25519	3.30009	3.29117	3.47079	3.42245	3.02713	3.5289	3.4295	3.45465	3.38777	3.32193	3.23864	3.47146	3.42251	3.37271	3.45092	3.33602	3.39848	3.63326	3.37257	3.45005	3.17611	3.42619	3.40678	3.17778	3.34561	3.344	3.66599	3.51633	3.57329	3.58058	3.40385	3.4408	3.50891	3.32266	3.47869	3.29112	3.1944	3.41899	3.33363	3.58578	3.25908
BS4_DM	-0.432751	-0.367223	-0.501053	-0.294831	-0.390822	-0.208681	-0.316753	-0.59623	-0.296816	-0.434945	-0.304634	-0.344618	-0.274575	-0.582876	-0.490902	-0.150177	-0.433894	-0.448116	-0.359398	-0.38649	-0.472012	-0.453599	-0.188564	-0.62037	-0.352965	-0.17146	-0.250095	-0.361736	-0.492633	-0.212454	-0.241418	-0.684562	-0.175289	-0.442062	-0.396236	-0.286819	-0.125822	-0.498245	-0.448547	-0.358612	-0.641923	-0.505113	-0.425219	-0.391517	-0.256185	-0.516531	-0.37367	-0.372813	-0.314353
BURDOCK_I	5.86237	7.90598	7.46578	7.1958	7.7758	8.02085	7.24808	7.7846	7.96168	6.84545	7.39854	7.83199	7.71832	7.14251	6.963	6.22197	7.15781	7.20088	7.37109	7.18776	7.22202	8.20038	7.13945	7.59946	6.94548	7.90435	8.04199	6.69556	6.98702	7.67339	7.73115	6.51975	8.2583	7.13929	7.35507	7.59868	6.88102	6.1816	7.39163	6.11982	6.65927	7.51931	5.75141	6.94983	7.64597	6.57917	6.23272	8.17531	9.07501
BURDOCK_LTR	2.43643	4.31626	3.8836	3.34014	3.83334	3.82312	3.93262	3.86413	3.85196	2.91828	3.71742	4.35109	3.70231	3.15661	2.71636	2.73296	3.44402	3.00766	3.51335	2.99642	2.74478	4.12107	3.59995	3.11594	3.13405	3.99597	4.11335	3.49112	3.44503	4.22565	4.09976	2.93331	4.25992	3.31663	3.22682	3.95281	2.80646	2.46916	3.80659	2.79725	3.12237	3.50501	2.20954	3.17407	3.39954	2.91016	2.35136	4.39332	4.03856
Chimpo_I	3.81284	3.59541	3.65694	3.88187	3.67463	4.04794	3.81576	3.54231	3.74947	3.85729	3.60625	3.73698	3.86586	3.54289	3.86835	4.04645	3.73149	3.72984	3.7312	3.72802	3.97415	3.40152	3.75998	3.91774	3.9094	3.89408	3.81432	3.83394	3.35451	3.8187	4.10901	3.81204	3.81425	3.72312	4.27658	4.18886	3.81378	3.42443	3.63123	4.15829	3.89283	3.60892	3.64909	3.72414	3.63231	3.80026	3.58777	3.73785	3.78277
Chimpo_LTR	0.614852	0.720571	0.68036	0.873537	0.450247	1.01269	0.654893	0.662857	0.58485	0.602867	1.06807	0.896335	0.769421	0.741815	0.576409	0.809132	0.762343	0.885105	0.680459	0.725377	0.754016	0.695315	0.872335	0.989529	0.758008	0.869462	1.15432	0.793341	0.748798	1.0099	0.833882	0.812347	0.627457	0.903314	0.980105	0.795297	0.716901	0.865001	0.652185	0.519615	0.95652	0.858433	0.735209	0.579374	0.745261	0.976695	1.01823	0.91424	0.581805
Chouto_I	4.03031	3.92358	4.09202	4.06448	3.99235	3.70355	4.07806	4.44128	3.70634	4.36341	3.57771	4.66228	3.7075	4.82135	4.10497	4.21069	3.62733	3.93001	4.92125	4.2222	4.49755	3.86951	3.70393	5.13346	4.72156	5.48693	4.53927	3.85026	3.8481	3.45884	4.57955	3.73555	3.99928	3.82299	3.84198	4.13447	3.98495	3.56013	3.85903	3.61459	3.85485	3.64976	3.57126	4.47823	3.93913	4.04999	3.98921	4.04369	3.55839
Chouto_LTR	1.66321	1.47994	1.77313	1.77044	1.61264	1.49693	1.69574	2.07182	1.75576	1.56793	1.95647	2.06611	1.66541	1.83801	1.97888	2.05248	1.64275	1.62353	1.82966	1.76655	1.85889	1.54189	1.41227	2.04934	1.83954	2.71094	1.93627	1.73272	1.30582	1.28241	1.99228	1.69749	1.96146	1.44261	1.87002	1.58547	1.79572	1.50476	1.68521	1.65103	1.91474	1.56766	1.74308	1.70034	1.4752	1.80415	1.82668	1.41991	1.48096
CIRCE	5.58926	4.97097	5.87525	4.94161	5.35745	5.30411	5.70362	5.27158	5.41981	5.2916	4.82888	5.33284	5.15449	5.05159	5.43186	6.00288	4.97384	5.42605	5.14956	5.34936	4.99334	4.96738	4.98932	5.06268	4.99672	5.07932	5.38549	5.39972	5.364	4.97222	4.97695	5.17405	5.23513	4.94936	5.24542	5.04735	5.16597	4.73073	5.50107	4.77619	4.70091	5.08639	5.54869	5.07297	4.93837	5.26549	5.47949	5.01342	6.20681
Copia1-I_DM	5.79944	6.1108	5.91255	5.89206	5.96503	6.21253	5.65754	6.11384	5.71105	5.84485	6.12212	6.2369	6.07702	6.00543	6.03641	6.11187	5.85301	5.927	6.21352	6.05216	5.94208	6.04318	5.90593	6.38787	6.07151	6.1425	6.16456	5.99916	6.1772	6.42013	6.80345	5.69703	6.10457	6.19224	5.94905	5.37359	6.20923	5.74636	5.91446	6.19538	5.87688	5.7977	5.80951	5.63906	6.12278	5.59513	6.01275	6.26125	5.90032
Copia1-LTR_DM	2.03433	1.88581	2.26743	2.23329	1.93481	1.78915	1.87919	2.05381	1.99596	2.11731	2.11899	2.20094	2.35311	2.27537	2.23931	2.32351	2.28551	1.98083	2.19218	1.94374	2.00731	2.13905	1.93618	2.22491	2.40999	2.39485	2.46269	2.47252	2.40068	2.06274	2.08822	2.22352	2.10115	2.0356	2.40399	1.91667	2.71928	2.23113	2.01996	2.16041	2.09109	2.11191	1.92118	1.6994	2.36103	1.94353	2.1371	2.12312	1.96519
COPIA2I_DM	5.439	5.12107	5.39901	5.18088	5.4716	5.47576	5.17591	5.34879	5.19076	5.11746	5.22966	5.38115	5.53487	5.31156	5.14981	5.59136	5.66839	5.49578	5.59715	5.17852	5.22652	5.04381	4.72254	5.33106	5.06314	4.94608	5.7424	5.54462	5.36103	5.24428	5.09523	5.26294	5.41102	5.22078	5.41137	5.50154	5.30147	5.12146	5.38921	5.10364	5.1898	5.22872	5.38839	5.21418	5.15381	5.33641	5.33665	5.24717	4.96988
COPIA2LTR_DM	1.65922	1.40685	1.7758	1.43684	1.49811	1.65295	1.4962	1.52292	1.47488	1.57913	1.45012	1.49329	1.51856	1.26275	1.65402	1.44254	1.59876	1.45794	1.54723	1.52925	1.29223	1.60144	1.37912	1.60689	1.16382	1.39529	1.59503	1.54571	1.53655	1.52249	1.40394	1.61916	1.57832	1.35934	1.36659	1.60495	1.64331	1.61453	1.44396	1.38179	1.5653	1.28167	1.36399	1.60047	1.52266	1.72034	1.43829	1.35528	1.28054
COPIA_DM_I	12.3835	10.6212	10.864	8.5963	12.928	9.18322	10.2455	11.1138	10.7277	9.73913	12.2708	11.8354	12.677	10.955	13.5722	10.4525	12.61	9.23916	9.40904	8.55714	8.68404	13.4922	11.7875	11.6028	11.5515	10.1176	11.9657	11.4207	10.0833	9.12527	9.46075	11.032	10.3919	8.76035	9.39482	11.866	7.9808	12.2907	10.5558	10.2429	10.3004	10.8174	8.54339	9.96137	11.3933	11.3203	9.85971	9.00939	10.7813
COPIA_DM_LTR	-2.08705	-5.47974	-3.81765	-2.93348	-2.2961	-5.08253	-3.61707	-2.31871	-2.6911	-3.51892	-4.63117	-4.80359	-2.26532	-5.41932	-2.10646	-4.73379	-1.70919	-3.39837	-3.00455	-3.30604	-5.00925	-0.975026	-1.77797	-1.93621	-2.49894	-2.59876	-2.98129	-2.61272	-2.39085	-3.03317	-6.66922	-3.03362	-3.31539	-3.57963	-3.78129	-5.34379	-5.60252	-2.16045	-3.09165	-4.23379	-3.5257	-5.2034	-2.70921	-3.44407	-2.19428	-3.18555	-2.8082	-5.41999	-2.99459
DIVER2_I	4.81821	4.77513	4.80273	4.827	4.85482	4.84331	4.7886	4.82029	4.76775	4.87509	4.844	4.79642	4.85728	4.80639	4.83087	4.93771	4.77753	4.81793	4.85673	4.84338	4.85882	4.8237	4.83283	4.74457	4.77446	4.85889	4.88066	4.9102	4.82301	4.86788	4.70035	4.84314	4.85162	4.82652	4.87753	4.82171	4.8908	4.84887	4.83013	4.81105	4.87555	4.85792	4.83895	4.78229	4.84282	4.83755	4.79648	4.82914	4.80005
DIVER2_LTR	2.7766	2.62137	2.7912	2.82115	2.65042	2.73349	2.69044	2.77856	2.66016	2.78548	2.68209	2.69386	2.73964	2.81837	2.7356	2.97324	2.67404	2.72214	2.77075	2.8979	2.64417	2.78668	2.7415	2.7974	2.58088	2.95734	2.81107	2.85177	2.63208	2.92833	2.62435	2.83807	2.86376	2.69421	2.82361	2.72995	2.86838	2.66027	2.6322	2.82884	2.83338	2.82383	2.78774	2.71996	2.83427	2.80236	2.74361	2.72794	3.15707
DIVER_I	4.84072	6.64157	5.4562	4.92994	6.38651	4.95561	7.21156	7.425	5.82147	5.13184	6.65507	6.97977	5.81164	8.78193	6.95473	6.21343	5.50762	6.13552	6.10107	5.68887	7.52989	3.93018	6.28257	6.15981	5.78442	5.71027	6.54441	4.5757	7.27859	6.15897	6.10757	7.36126	6.12561	5.30101	7.46189	6.68506	5.70542	5.43754	4.13696	5.2347	6.07775	6.64782	5.69392	7.03239	5.34491	5.65006	6.93791	5.1517	4.63846
DIVER_LTR	-0.16691	1.98783	1.38908	0.513531	1.68812	0.953418	2.32941	1.93795	1.54145	0.337172	2.03491	2.76951	1.56842	2.87593	1.99563	1.23244	1.70988	0.965651	1.65262	0.917737	1.90888	-0.497505	1.6943	0.968047	1.2216	0.603456	1.42773	2.44975	2.71801	2.76773	1.87223	2.2598	2.52465	0.322426	1.97625	1.61837	0.422622	0.713311	-0.385929	1.16639	1.216	2.3429	1.25882	1.20636	-0.440611	0.456025	1.23746	1.13884	0.70249
DM1731_I	7.91347	7.27974	7.6525	7.66474	8.80435	7.80551	7.44449	7.81137	7.36255	7.01048	7.90501	7.49718	7.87881	7.70476	10.4313	7.64764	7.20959	8.00649	8.306	7.73814	7.33344	7.43554	6.74843	7.89164	7.76273	7.72388	8.39734	7.68741	7.43514	7.48875	8.27584	7.54122	7.46486	7.34407	7.27036	7.98993	7.84519	7.74059	8.302	7.0097	8.26259	7.36068	8.03977	7.36451	7.55087	8.02404	7.46371	7.49492	6.88843
DM1731_LTR	4.78406	4.51443	4.81579	5.05471	5.08484	4.67549	4.34575	4.97773	4.21052	4.45698	4.94985	4.86205	5.2484	4.73534	5.56672	5.05837	3.9919	5.09189	5.16807	4.14168	4.45645	4.36489	3.92217	4.67136	4.78202	4.70774	5.14759	4.96411	4.86098	4.64246	5.46722	4.69122	4.78342	4.57309	4.38559	4.70341	4.75683	4.42195	4.94548	4.16866	4.82948	4.48198	4.71673	4.36985	4.79826	4.77321	4.57061	4.83708	4.14836
DM176	6.47613	5.8628	5.84525	7.89963	5.94086	6.38121	7.24524	6.24911	6.13399	6.37434	6.85339	6.32654	7.77841	5.76523	6.01219	6.9333	5.97718	6.16111	7.18927	6.29462	5.85179	6.36005	6.31149	7.18028	6.1908	5.73237	5.8202	6.15349	6.35984	8.22256	6.30203	6.52822	6.64485	5.9324	6.28505	6.81291	6.4781	5.82621	5.72012	6.26738	5.84434	6.64397	5.84549	6.11588	6.23303	6.03362	6.48847	6.11615	6.15795
DM297_I	8.19922	8.72548	8.01033	7.66721	7.77715	6.79664	7.9038	7.71639	7.71419	7.32833	7.12215	7.90316	7.55314	7.02813	9.06545	8.40456	9.41003	7.421	7.93406	6.96377	8.46309	7.34956	7.07973	9.52981	9.7972	7.38695	8.34876	7.07383	8.63052	6.94354	8.95546	9.93911	8.30772	7.00308	7.3428	7.90477	8.30359	7.25938	7.9055	6.71315	7.55144	7.77006	7.10844	7.10384	8.01109	8.80361	7.02662	8.16859	8.27665
DM297_LTR	4.48444	4.81119	4.53905	4.22132	4.14165	3.63483	4.20027	4.63584	4.40846	4.29077	4.21231	4.37512	4.21162	4.58979	4.51567	4.43224	4.48865	4.23606	4.32462	3.58233	4.46457	4.05776	3.94481	4.88769	5.04708	3.90639	5.3279	4.25496	4.77389	4.07179	5.19025	4.89102	5.16413	3.84689	3.87174	4.2358	4.45844	4.20751	4.68085	3.66707	4.18336	4.34281	3.89907	4.36257	4.38456	4.49477	3.87544	4.25856	4.44049
DM412B_LTR,DM412_LTR	4.80236	3.53917	4.14846	3.85593	3.79492	4.71137	4.29567	3.86759	4.03678	3.62759	4.49111	3.97415	3.81415	4.20578	3.77123	4.6462	5.01435	4.06582	4.33055	4.05522	3.65329	4.68014	3.96235	4.01751	4.08609	4.43375	4.21033	3.99459	4.30236	4.02434	4.69761	4.07458	4.70726	4.12057	4.49908	3.42298	3.90032	3.7912	3.77138	4.30861	4.5257	4.33317	4.62785	4.15855	3.65349	4.69797	4.49666	4.20565	3.92606
DM412_I	8.23802	6.57487	8.00021	7.204	7.21779	7.047	7.52488	7.5095	7.73899	6.9625	7.44235	7.23495	7.29062	7.40954	7.50402	8.26902	8.22005	7.08496	7.51732	7.13805	7.10807	8.53421	7.38514	7.56245	7.49415	7.5921	7.9937	7.66626	8.58912	7.85287	8.57168	7.66241	8.62612	7.62876	6.93981	6.33708	7.08891	7.42742	7.1921	7.66819	8.06742	8.1442	8.57049	6.70023	6.82824	7.52237	7.13722	6.99339	7.49996
DMCR1A	8.02239	7.90305	8.00263	7.91514	7.87214	7.92007	7.93287	8.03455	8.02249	7.93627	7.87288	7.93105	7.94137	8.01412	7.98151	7.9779	7.96906	7.91862	8.00191	7.88546	8.07928	7.9876	7.95294	8.14151	7.97469	7.93034	7.98981	7.99531	7.96073	8.00346	7.88916	7.9363	7.92704	7.9602	7.877	7.85891	7.98391	7.90186	7.90965	7.98924	7.96053	7.95752	7.94103	7.91732	7.94322	7.98375	7.92451	7.91433	7.90086
DMHMR1	6.0601	5.57637	6.11248	5.42209	6.3128	6.55745	5.89465	6.77668	5.78513	5.62869	5.13776	6.89022	6.17454	5.26635	6.61293	5.9475	6.09544	6.41921	6.05414	5.4958	7.21495	4.76361	5.28144	5.21612	6.08034	6.36055	6.01507	5.73092	5.79792	5.48835	6.10103	5.63474	5.75235	6.31303	5.88452	5.77888	5.79746	5.55563	5.52052	6.42813	5.43899	5.25548	5.41883	5.37642	5.14614	5.35301	5.73611	6.58472	6.66145
DMHMR2	-0.260468	-0.781044	-1.508	-0.636711	-0.264141	-0.00331324	-0.903068	-0.922581	-0.484063	-1.21382	-4.13283	0.704102	-2.03107	-1.50828	-1.23772	-1.21443	-0.912661	-0.33704	-0.83091	0.811896	-1.52525	-0.24558	-0.0244339	-1.16861	-1.53245	-0.149553	-1.94292	-0.879359	-1.3695	-1.61058	-1.10106	-0.453932	-1.21517	-1.31319	-0.38244	-0.293193	0.129642	-1.13582	-0.663353	-1.3016	-0.651639	-1.2727	-0.667832	-0.678265	-0.312359	-1.51873	-0.463831	-0.913452	-1.61495
DMLTR5	3.44527	2.87668	2.30394	2.31257	2.9523	2.44281	1.79737	1.72263	1.92181	1.37417	2.04951	1.96013	3.02423	2.83195	2.69205	1.9604	2.22169	3.42624	2.07361	2.48694	3.1835	1.33451	2.01572	2.87446	2.41775	3.10801	2.34375	3.02297	2.66667	2.70336	1.95858	2.58285	2.31433	2.33727	2.52483	2.29885	3.32628	2.05732	2.07727	2.16634	2.30639	1.4137	3.43035	2.48951	2.61457	2.4815	2.14358	2.3653	2.34934
DMRP1	0.870328	1.05615	0.681908	0.772768	0.766232	0.938726	0.83696	0.770638	0.869432	0.708094	0.883812	0.964276	0.774169	0.973382	0.716762	0.897192	0.796637	0.693033	0.883974	0.793118	0.747025	0.968181	0.886709	0.845993	0.842584	0.856336	0.891615	0.726349	0.69577	0.786733	1.10344	0.968348	1.00631	0.739744	1.07504	0.868457	0.715787	0.561049	1.10011	0.783285	0.880182	0.625075	1.07772	0.925845	0.936468	0.769708	0.883092	0.846586	0.852051
DMRT1A	5.56129	5.55578	5.5568	5.49404	6.03158	5.52883	5.57046	5.54938	5.61556	5.71007	5.46167	5.54717	5.849	5.38073	5.78675	5.94486	5.35544	5.77433	5.74685	5.39445	5.82464	5.27932	5.41457	5.62977	5.85232	5.3772	6.02013	6.05674	5.45653	5.752	5.4503	5.73162	5.65228	5.54911	5.83495	5.94987	5.91362	5.6294	5.6519	5.69844	5.55149	5.23968	5.77012	5.56012	5.58322	5.6526	5.77937	5.425	5.35225
DMRT1B	6.70616	7.55104	6.80049	6.48024	6.46537	6.78367	6.41976	6.38916	7.08444	7.0815	6.80399	7.9792	6.46516	6.45854	7.46902	5.99397	6.77645	6.65054	6.01049	6.25883	7.68658	7.00189	6.88349	6.03025	6.13315	8.06479	6.19142	6.6349	6.23286	6.41857	5.94333	6.91854	6.02818	7.67551	7.08052	5.87443	6.52613	6.88349	6.68843	8.03694	6.27237	7.41254	7.48984	6.46027	6.34486	7.19617	6.76411	7.58424	6.38231
DMRT1C	3.21674	3.18165	3.21441	3.23812	3.18562	3.25507	3.20632	3.2174	3.24104	3.22833	3.20118	3.24622	3.26118	3.20441	3.1979	3.26453	3.12844	3.22489	3.12289	3.21611	3.1845	3.11759	3.22594	3.14086	3.24485	3.26828	3.18412	3.23774	3.11148	3.30242	3.13953	3.18889	3.18417	3.20246	3.24159	3.14846	3.2314	3.219	3.19535	3.23964	3.24438	3.16105	3.26587	3.22545	3.20164	3.1789	3.20692	3.19066	3.12621
DMTOM1_LTR	2.64968	2.69579	2.69295	2.7464	2.69962	2.61721	2.63259	2.70304	2.69542	2.56679	2.63967	2.69407	2.74421	2.79766	2.69405	2.75693	2.66361	2.82238	2.72103	2.57753	2.72068	2.65402	2.68877	2.78882	2.72666	2.73964	2.77349	2.70586	2.67456	2.64434	2.71985	2.7923	2.84278	2.704	2.74018	2.78092	2.62057	2.841	2.70233	2.70102	2.61418	2.77178	2.65922	2.55927	2.80861	2.73239	2.68402	2.78067	2.68715
DNAREP1_DM	8.0833	8.07278	8.09569	8.0666	7.95733	8.09556	8.00238	8.0888	7.98274	7.94337	8.15673	8.01956	8.06305	8.20099	8.04026	8.08373	8.06295	8.05363	8.01012	7.9111	7.99273	8.0528	8.13601	8.16144	8.15087	8.05948	8.21336	8.06604	8.07792	8.14346	8.21536	8.12698	8.12845	8.07549	8.06039	8.14459	8.07772	8.07136	8.09385	8.10497	8.0577	8.09445	8.10372	7.99279	8.14866	8.10645	8.03602	8.24424	8.14311
DOC	7.30828	7.76108	6.85409	7.84755	7.60142	8.03144	7.46179	7.63893	7.75617	7.48495	7.0496	7.16476	7.08765	8.18882	7.68113	7.65653	7.54356	8.16969	7.69222	8.01804	7.96444	8.06805	6.83996	7.94832	9.45026	7.88557	7.47267	8.00018	7.58395	8.02628	7.67777	8.42413	7.1047	7.9405	7.0085	7.64716	7.93623	7.44126	7.2932	7.40734	8.02696	7.61282	7.65618	7.84069	7.42041	7.54154	7.82818	7.20369	7.93879
DOC2_DM	5.94803	5.78072	5.84059	5.71156	6.03413	5.8797	6.07737	5.79417	5.68905	6.07115	5.56684	6.26248	5.88606	5.91913	5.79964	6.22015	5.92992	5.81851	5.98077	6.02784	5.35515	5.90769	5.86125	6.13223	6.12067	5.73394	5.86816	5.76137	5.81219	6.00053	6.00856	5.88288	5.83307	5.73117	5.77963	5.81688	6.00921	5.65494	5.75499	5.85265	6.59146	5.89987	5.77419	5.82881	5.89405	5.82858	5.57604	5.86634	5.91752
DOC3_DM	7.15708	7.12784	7.03532	7.17251	6.88163	6.87559	7.08107	7.12699	7.17701	7.10663	7.10925	6.95819	7.17103	7.19761	6.95091	7.00796	6.92888	6.95683	6.79682	7.07877	7.22977	6.99662	7.26003	7.11862	6.89811	6.74995	6.92331	7.01191	6.89763	7.14621	6.84129	6.86775	7.11735	7.01977	6.82597	6.65064	7.16695	7.04679	6.96409	7.06442	6.87826	6.97617	7.07716	7.17458	7.26816	7.00345	7.06413	6.88655	7.03277
DOC4_DM	4.69048	3.81158	4.48843	3.76516	4.83369	3.70445	4.43037	3.58196	4.12409	3.86314	4.31566	4.64744	3.79536	4.52342	4.12881	5.02993	4.24211	4.34814	3.49704	4.55738	4.3338	3.48056	3.67312	3.5371	3.65221	4.50117	4.38082	4.52205	3.64522	3.99972	3.50325	4.72481	4.1415	4.19953	4.32477	4.45858	3.83189	4.81038	4.6552	4.56486	3.86292	3.7532	4.79418	4.05925	3.97602	4.32767	4.28983	3.95424	4.01109
DOC5_DM	3.65786	3.63088	3.74388	3.77588	3.68736	3.76582	3.65782	3.68196	3.76369	3.74081	3.62789	3.74564	3.72222	3.7466	3.80965	3.63115	3.71741	3.76742	3.84367	4.02077	3.69224	3.58466	3.58787	3.75272	3.74492	3.82534	3.62746	3.75067	3.81362	3.67591	3.81892	3.72125	3.82044	3.72861	3.83395	3.69425	3.77376	3.56492	3.66963	3.69072	3.72244	3.6864	3.67766	3.75728	3.51077	3.60166	3.78777	3.6731	3.94612
DOC6_DM	5.34039	5.34648	6.92577	5.37622	5.37976	6.50441	4.44418	4.55493	6.46385	5.71123	4.08116	6.60627	4.99706	5.86119	6.31769	5.67116	6.058	4.82328	5.01266	3.57078	4.61817	5.69763	5.64849	4.54066	6.44875	4.92886	5.74951	5.56694	4.93805	7.02513	6.49063	6.45896	6.23601	5.93912	3.9767	3.66251	5.00455	5.3588	3.99952	6.83415	5.50573	5.2619	5.74847	5.06833	4.83915	5.28799	6.59391	7.21538	5.94121
FB4_DM	6.78642	6.50454	6.5958	6.60587	6.44549	6.83214	6.48658	6.9507	6.44388	6.41048	6.7319	6.60521	6.63452	6.82642	6.61913	6.66877	6.53964	6.58088	6.58461	6.16914	6.69704	6.8786	6.66732	6.7475	6.72638	6.54941	6.68064	6.72548	6.72662	6.6255	6.76815	6.68098	6.82601	6.75753	6.56887	6.76471	6.59414	6.81244	6.80093	6.65342	6.45682	6.58879	6.49453	6.46366	6.8707	6.47022	6.68304	6.97807	6.83517
FROGGER_I	3.19136	2.66688	3.61875	3.23654	3.50415	3.76551	3.69151	3.16616	3.00571	3.16617	3.10368	3.14649	3.83811	3.21725	3.41415	3.65282	3.22195	3.56241	3.67918	2.68386	3.10439	3.45464	3.13608	3.17969	3.28137	3.47669	3.12322	3.23912	3.17248	3.58966	3.61566	4.33411	2.93778	2.87409	3.44265	3.58057	3.14632	3.23682	3.69911	2.95174	3.56038	2.97285	3.45092	4.05175	3.76889	3.75105	3.42091	3.4763	3.29168
FW	7.32724	7.50767	7.47588	7.6584	7.4025	7.34242	7.4979	7.61885	7.56444	7.7023	7.36583	7.25435	7.90892	7.30696	7.18311	7.92304	7.23922	7.6351	7.4705	7.67948	7.84543	7.38671	7.64237	7.47281	7.22942	7.49241	7.43015	7.68435	7.50548	7.40879	7.21726	7.88703	7.58131	7.42649	7.59201	7.38853	7.91461	7.36823	7.23526	7.70317	7.50791	7.52909	7.49978	7.57181	7.58425	7.30724	7.35488	7.22342	7.8356
FW2_DM	4.55339	4.55412	4.52203	4.49802	4.59712	4.53635	4.34778	4.70006	4.48648	4.2993	4.43242	4.53601	4.69456	4.34504	4.3444	4.78241	4.60818	4.61399	4.77548	4.48598	4.71704	4.6553	4.35236	4.75126	4.66385	4.47408	4.60773	4.65776	4.58779	4.62772	4.40118	4.49559	4.59981	4.51711	4.56331	4.413	4.60413	4.62022	4.53922	4.60462	4.42571	4.53111	4.54692	4.66741	4.49265	4.70773	4.57753	4.52649	4.56398
FW3_DM	1.45041	1.72664	1.67053	1.53413	1.85647	2.16554	1.76452	1.96162	1.67452	1.74746	1.7484	1.98164	1.93058	1.98955	1.73348	1.79419	1.69806	1.87401	2.21829	1.95816	1.83669	1.79817	1.80085	1.89632	2.014	2.27719	1.77863	1.75432	1.82655	1.80079	2.15078	1.7069	2.17579	1.77961	2.13535	2.31759	1.95407	1.57092	1.86778	1.60069	1.83934	1.69526	1.72967	2.15849	1.78455	1.90022	1.93701	1.75489	1.71757
G2_DM	2.87318	2.39099	2.62949	3.99798	3.22592	3.20219	3.32287	2.58263	3.00019	3.24863	2.89392	3.15551	2.89742	2.13172	2.74962	3.46708	2.63078	3.74163	3.03057	3.33355	2.8225	2.84218	2.83361	2.45336	2.35164	3.38698	2.76257	2.90801	2.96616	2.88072	2.94391	2.62542	4.04971	3.48885	3.29456	3.24896	3.35905	2.39331	2.85568	2.24494	3.51482	2.78127	3.17718	3.1238	3.58841	2.67581	3.12178	2.89117	3.24253
G3_DM	2.8896	2.86481	3.00637	2.81692	2.81498	2.9677	2.79922	2.66776	2.64817	2.70227	2.72625	2.88643	2.80888	2.70987	2.83638	2.92064	2.54605	2.6319	2.94514	2.79101	3.05372	2.71287	2.65543	2.768	2.93135	2.81556	2.58979	2.64483	2.74469	2.9632	2.72089	2.74213	2.87027	2.72873	2.89946	3.03898	2.86095	2.5654	2.67345	2.65699	2.99121	2.689	2.54351	2.79373	3.00162	2.81413	2.88367	3.03125	2.90665
G4_DM	4.78493	4.92679	5.0484	4.89317	4.86281	5.167	4.71499	4.76123	4.55357	4.59424	4.99066	4.67926	4.63621	5.11422	4.998	4.74814	5.25011	4.63628	4.77515	4.67542	4.58974	4.75984	5.01243	5.09794	5.0138	4.90957	4.71747	4.67771	4.66643	5.14069	5.00118	5.00564	5.14702	4.63308	4.79157	4.78619	4.83582	4.51506	4.8253	4.61709	4.70433	4.83006	4.42248	4.66173	5.00766	4.75804	4.98017	4.83457	4.65816
G5A_DM	4.88061	4.80706	5.02596	4.804	4.91629	5.20352	4.84587	4.95433	4.85636	4.70958	5.02964	5.14934	4.7771	5.00063	4.83512	5.111	5.01818	5.05407	4.84763	4.74759	5.02934	4.96039	4.86281	5.11779	5.01507	5.10683	5.28726	4.99847	4.83226	4.90061	5.06168	5.1108	4.92691	4.85139	4.93899	5.02014	5.00542	4.74178	4.99675	4.9249	4.96681	4.90758	4.82982	4.8204	5.11531	5.09923	4.91537	5.02875	4.85186
G5_DM	4.85601	4.68305	4.84084	4.67784	4.69911	4.68938	4.83369	4.69469	4.63773	4.66162	4.67204	4.70949	4.55748	4.65908	4.81445	4.73967	4.5504	4.81261	4.4877	4.67148	4.56976	4.46432	4.70627	4.8238	4.6624	4.80855	4.60888	4.69099	4.55141	4.68476	4.58813	4.85389	4.65526	4.51448	4.52438	4.57013	4.5928	4.28608	4.73053	4.71342	4.62383	4.60102	4.76935	4.78066	4.71986	4.71508	4.61449	4.8083	4.56231
G6_DM	0.859535	1.52568	0.841263	0.766035	2.13953	1.57733	0.940766	1.24669	0.911354	1.85401	0.786747	0.917441	0.635248	0.00402316	0.4691	1.0005	0.81428	3.23074	1.35891	1.58254	2.31251	0.785539	0.400248	0.505493	0.71922	1.31155	0.765572	0.481845	2.8725	4.61463	1.79873	1.12357	0.896956	1.77497	1.39881	1.51217	1.48904	1.41728	0.832477	0.930098	1.14837	0.818498	0.828487	1.50919	1.52105	1.30986	1.356	1.28369	0.734559
G_DM	0.322646	0.459247	0.223517	0.869044	1.03787	0.595637	0.895494	0.385862	0.988684	1.38602	0.494371	0.460685	0.541856	0.221253	0.956481	0.384686	0.513185	0.804833	0.645466	1.70002	0.130919	0.258602	0.308148	0.630116	0.230603	0.795905	0.640345	0.839291	0.800961	1.90159	0.919104	0.373177	0.785051	1.13317	1.07375	0.984497	1.02247	0.852716	0.729281	0.381185	0.737136	0.734763	0.689203	1.12632	0.590963	0.39353	0.889821	0.862481	0.535107
GTWIN_I	4.66042	3.61934	2.986	3.63109	4.59973	3.493	4.54724	2.53501	3.60969	4.15496	3.37055	3.41017	3.64304	4.14253	3.90723	3.63532	3.52793	4.55791	2.89892	5.21566	4.43357	3.20372	4.24252	3.02532	3.51667	4.06507	4.17644	2.94764	2.70614	2.71144	3.61493	4.808	3.61321	5.08277	4.22305	3.54804	4.04461	4.42377	4.40957	3.58377	3.94885	3.18625	4.76989	5.11958	4.43965	3.99414	4.46353	3.23002	6.45056
GTWIN_LTR	1.52491	0.0967104	0.0810214	0.232274	1.65216	0.900357	2.00484	0.410232	0.659259	1.04624	0.258111	-0.197748	-0.122204	0.442334	0.705067	0.489511	0.0507238	0.794015	0.127971	2.43671	0.516733	0.459943	0.825619	0.146204	0.212053	1.05917	1.72833	-0.0906926	-0.362633	-0.0917496	-0.567294	0.811112	0.343102	1.46075	0.815366	0.12519	0.985431	1.47387	1.46376	0.852138	0.57373	-0.130875	1.44465	1.87462	0.673874	0.964145	0.940251	0.544195	2.03876
GYPSY10_I	5.04345	5.25863	5.2709	5.21892	4.81476	5.41073	4.73792	4.93252	4.91047	4.72229	4.75479	5.0598	4.58107	4.88817	4.96236	5.32218	4.71689	4.52292	5.22558	4.93299	4.27423	4.82822	4.78223	5.05984	5.35895	4.9008	5.14102	5.69482	5.0236	4.89965	4.95628	4.8524	5.90771	4.95322	4.91995	5.24113	5.14376	4.94057	5.20275	4.88171	5.14677	5.28114	5.13414	5.16765	5.68473	5.01414	5.22699	5.846	4.97199
GYPSY10_LTR	2.47884	2.52049	2.64417	2.49196	2.45197	2.75874	2.24171	2.46084	2.37925	2.29697	2.42652	2.65764	2.00973	2.47316	2.24413	2.74937	2.20268	2.29041	2.52414	2.33457	2.14096	2.21278	2.47532	2.47781	2.56281	2.39286	2.46847	2.82286	2.3066	2.36032	2.66727	2.14475	3.10608	2.18453	2.57875	2.77897	2.35589	2.53737	2.57448	2.382	2.56559	2.73182	2.58129	2.66743	3.13206	2.41135	2.29916	3.18504	2.10866
GYPSY11_I	3.33328	2.7388	3.29274	2.88502	2.90442	3.37381	3.10393	3.05858	3.32235	2.68881	3.03373	3.16869	3.07831	3.06587	3.22632	3.28483	3.29963	3.15268	3.23472	2.92338	3.1695	2.89778	3.01651	3.35964	3.22523	3.29576	3.10208	2.84246	3.40827	2.99068	2.87327	3.50961	3.21938	2.98009	3.15643	3.04944	2.98101	2.91331	3.48053	3.12633	2.94685	3.24516	3.1756	3.28765	2.83308	3.03249	3.06084	3.2166	2.80421
GYPSY11_LTR	1.77534	1.53333	1.68961	1.57389	1.42846	1.64078	1.55517	1.60112	1.68922	1.45813	1.64732	1.61139	1.535	1.79274	1.70559	1.7815	1.62051	1.77382	1.55561	1.61444	1.70542	1.409	1.65016	1.80014	1.68885	1.89987	1.7421	1.62238	1.57882	1.61612	1.56028	1.74207	1.67128	1.53608	1.65681	1.4962	1.71511	1.52654	1.73037	1.65852	1.48149	1.67548	1.54494	1.74131	1.42128	1.73975	1.56513	1.69249	1.44871
GYPSY12A_LTR	3.72675	3.58	3.60398	3.39186	3.69789	3.81402	3.80778	3.59189	3.28919	3.68957	3.61353	3.85709	3.59987	3.69314	3.47307	3.55356	3.69813	3.4583	3.62622	3.99002	3.39563	3.67337	3.56047	3.59511	3.86395	3.64778	3.46617	3.39915	3.34116	3.75742	3.89077	3.3611	3.55848	3.76824	3.46847	3.41439	3.81905	3.75678	3.7366	3.68223	3.43793	3.56181	3.68465	3.72602	3.56347	3.3148	3.58333	4.04587	3.69805
GYPSY12_I	6.17164	6.17548	6.3575	6.17035	6.39373	6.34582	5.97227	6.08691	6.06131	6.15117	6.02485	6.33092	6.36231	5.8037	6.16553	6.54582	5.7213	6.2846	6.45792	6.18461	6.10628	6.12222	5.69069	5.94421	6.16878	6.10326	6.72339	6.3598	6.53072	6.05829	5.9906	6.24516	6.303	6.26797	6.28731	6.1418	6.34251	6.02039	6.08696	6.06932	6.28497	5.98049	6.05568	6.16282	6.08783	5.91531	6.19854	6.11605	6.07879
GYPSY12_LTR	3.96605	4.19232	4.17164	3.98513	4.39736	4.37895	3.99054	3.84943	4.15692	3.67536	3.96465	4.28948	4.13037	3.94124	4.45992	4.67886	3.92646	4.17584	4.51232	4.15266	5.76712	4.00467	3.75337	4.07967	4.21822	4.42924	3.8657	4.0931	4.04012	4.2749	3.97191	4.10747	4.11578	4.25647	4.14923	3.84971	4.24929	3.62603	3.921	4.55406	4.09925	4.09677	3.60631	4.55664	4.1274	3.77743	3.9815	4.18629	3.78689
Gypsy1-I_DM	3.28416	6.44452	5.3771	6.64288	5.7334	6.50487	5.87786	5.89868	6.6958	5.00876	5.26939	5.47893	4.99837	8.49291	3.858	4.48424	6.62328	4.35135	6.85792	4.96888	3.47769	7.85245	6.5289	6.918	4.05387	7.68788	3.52185	6.60573	5.74855	3.158	3.66508	4.4118	5.13253	6.62165	4.97753	4.82432	6.27376	6.72744	6.70773	7.70471	9.08438	4.11969	3.80333	7.21157	8.26659	7.6827	6.35392	5.6406	4.70456
Gypsy1-LTR_DM	-1.19866	0.690205	0.132514	1.26642	-0.000725397	1.12181	0.973614	0.605573	0.218879	0.423987	0.460511	0.356189	0.289659	1.54624	-0.065255	-0.0843413	1.41696	-0.107467	2.6962	0.348774	-0.46391	1.91827	2.32996	1.10519	-0.368964	0.97911	1.0441	1.133	0.0237276	-0.409493	-0.443525	-0.666873	1.20842	0.557557	0.0784394	0.0528444	0.75801	1.01988	1.38405	1.93742	2.91482	0.138412	-0.8272	1.16811	0.704725	1.69514	0.296007	0.886298	0.778269
GYPSY2_I	4.73331	4.52738	4.84845	4.71925	4.72082	4.67886	4.64368	4.78498	4.49765	4.75671	4.77936	4.8138	4.62134	4.77821	4.75852	4.77383	4.74625	4.41412	4.688	4.85172	4.8229	4.88912	4.77528	4.9404	4.83947	5.02017	4.57623	4.87813	4.61354	4.82742	4.85358	4.79269	4.58953	4.79446	4.74226	4.60813	4.81841	4.81598	4.71559	4.85421	4.77401	4.80933	4.59153	4.57188	4.74293	4.90015	4.75972	4.73368	4.60143
Gypsy2-I_DM	6.12228	6.05253	4.75876	5.26992	7.07769	4.61678	4.99451	4.99217	6.53554	4.2508	5.24378	6.94114	5.18268	8.14989	7.21865	5.85258	7.75786	5.65452	5.32921	5.41821	5.51826	4.91193	8.63262	5.72485	7.04624	5.27865	6.21483	5.65024	7.59488	5.28851	6.88663	4.71334	5.66707	5.45704	5.71085	5.27307	5.61783	5.07634	7.58662	7.8717	5.09665	5.35684	5.14435	7.28129	8.01991	6.93604	7.79039	5.58604	4.42187
GYPSY2_LTR	1.22551	0.994789	1.27956	1.26332	1.11841	1.2306	0.867591	0.878604	0.819551	1.08736	1.27934	1.3779	1.15605	1.2243	1.06935	1.28146	0.895042	1.0081	0.936663	1.10699	0.935922	1.23928	1.13116	1.20191	1.10262	1.04755	0.931	0.991947	0.912185	1.33464	1.17701	1.09885	0.998495	0.983521	1.11037	0.829433	1.12459	1.22531	1.12146	1.16142	1.15962	1.34455	1.13761	1.21764	1.22474	1.11843	1.1407	0.977035	1.13817
Gypsy2-LTR_DM	2.98059	2.72895	2.55391	2.42241	2.70643	2.52921	2.10501	2.64171	2.56933	2.39078	2.45414	3.40121	2.76565	3.15453	3.1126	2.86092	3.1056	2.57754	2.92837	2.48105	2.3239	2.3906	4.08399	2.68904	3.19616	2.7094	3.27713	2.79316	3.20093	3.19506	2.99667	2.51757	2.7937	2.2309	2.72844	2.46579	2.61269	2.43243	3.24658	3.34362	2.69522	2.37308	2.09852	3.21482	3.45831	3.12328	3.44401	2.52373	2.24941
GYPSY3_I	3.4035	3.37628	3.97403	3.60553	3.49345	3.5151	3.62121	3.56327	3.64106	3.71683	3.52417	3.54953	3.55619	3.46014	3.59303	3.59759	3.11154	3.31259	3.04864	3.72592	3.48109	3.34384	3.69601	3.46847	3.55534	3.76644	3.54007	3.3239	3.0334	3.53214	3.45772	2.92667	3.46549	3.54487	3.54093	3.13188	3.72209	3.14771	3.47353	3.66103	3.36663	3.21833	3.31512	3.62252	3.72275	3.41631	3.57025	3.41641	4.12822
GYPSY3_LTR	0.485913	0.611921	0.40516	0.955006	0.239024	0.478711	0.506783	0.385747	0.551558	0.45488	0.72924	0.498015	0.741196	0.371667	0.765256	0.650417	0.352181	0.467667	0.224039	0.440566	0.562907	0.552259	0.799651	0.530059	0.76162	0.909659	0.732687	0.75378	0.356475	0.676722	0.55318	-0.624546	0.544254	0.630828	0.67529	0.611153	0.683192	0.587423	0.551286	0.599494	0.391843	0.118493	0.658454	0.601089	0.769295	0.474562	0.59379	0.648673	0.609568
GYPSY4_I	6.47432	5.92394	6.32915	6.08047	6.27943	6.07758	6.47649	6.28504	6.46151	6.3431	6.00301	6.24451	6.05673	6.31103	6.29529	6.26853	6.48201	6.08376	6.11497	6.355	6.11963	6.1509	6.16572	6.33116	5.99979	5.99595	6.19374	6.06717	6.13538	6.12728	5.89532	6.35736	6.15859	6.02336	6.12563	5.98239	6.18379	6.41301	6.58655	6.17858	6.22029	6.107	6.57005	6.48327	6.02572	6.43523	6.01263	5.85685	6.26002
GYPSY4_LTR	2.35216	2.17531	2.23147	1.98432	2.19218	1.95698	2.48899	2.17157	2.28	2.24326	1.96791	2.35968	2.04657	2.16104	2.22853	2.16009	2.2677	2.04421	2.06367	2.28898	2.01327	2.08312	2.18739	2.2221	2.11599	2.09266	2.18748	1.99014	1.83885	1.88041	2.05536	2.41424	2.13808	2.06821	2.17435	1.90382	2.12896	2.47058	2.65929	2.29074	2.28641	2.18397	2.50986	2.37994	1.93429	2.13545	1.89884	2.16339	2.27364
GYPSY5_I	2.65857	2.76326	3.64737	2.67535	3.27094	3.25039	2.86788	3.51775	3.35467	3.37607	4.76224	3.54694	4.07982	2.70025	3.46945	2.89289	3.27536	2.94757	4.89021	3.10324	2.74313	3.64549	3.02347	3.63549	3.4626	3.19066	3.48961	3.13699	3.35267	3.50081	3.5646	3.73668	3.48346	2.70495	3.07349	3.04746	2.98868	4.46662	3.50046	2.9941	2.77607	3.35928	3.25707	2.77127	2.21953	2.92772	2.57546	2.59913	3.45865
GYPSY5_LTR	-0.977981	-1.39159	-0.929168	-0.961692	-0.840368	-1.09016	-1.21071	-0.876956	-0.682213	-1.24717	0.038979	-1.30552	-1.28187	-0.805241	-0.999324	-1.22834	-1.49413	0.00649578	0.012819	-0.293177	-0.736853	-0.764264	-1.42044	-0.499361	-0.478037	-0.109668	-1.70992	-0.779941	-0.645744	-0.63075	-1.29019	-0.808612	-0.515929	-0.987229	-0.3946	-0.249013	-0.765089	-0.459547	-0.924792	-0.507874	-0.903313	-1.10901	-1.04906	-0.922816	-1.12144	-0.700172	-1.65774	-1.86571	-0.932666
GYPSY6A_LTR	2.66926	2.6561	2.73444	2.55754	2.6111	2.79618	2.67627	2.73637	2.77091	2.83877	2.50287	2.587	2.70072	2.6045	2.67405	2.94274	2.63348	2.69255	2.89388	2.8624	3.85622	2.4543	2.51136	2.52536	2.67363	2.85741	2.68442	2.70869	2.59923	2.76728	2.36533	2.68571	2.87088	2.83934	2.83535	2.52821	2.80588	2.53401	2.50181	2.86214	2.64294	2.73072	2.52007	2.66495	2.81949	2.56744	2.59402	2.56691	2.54453
GYPSY6_I	4.49577	3.2591	4.10682	3.99961	4.03332	4.06482	4.5815	4.10719	4.05307	4.31834	3.92786	3.90611	4.12206	2.85846	3.86528	4.48	3.88591	3.85707	3.99168	4.44592	5.30751	4.24339	3.21279	4.09333	4.08792	4.33535	3.74806	3.3936	3.45685	5.45554	3.98829	3.74729	3.93479	4.14552	4.21232	3.89578	4.16013	4.06679	4.14166	4.62376	4.21646	3.8766	3.74631	4.38947	4.42199	3.92017	4.05939	4.24491	3.72374
GYPSY6_LTR	0.892826	2.19601	1.54818	1.63574	1.15169	2.78048	2.39219	1.94819	1.76458	1.41053	1.21821	1.70492	1.79078	2.48519	0.746399	1.38676	2.79237	0.994952	2.86579	1.21236	2.04251	2.98655	1.79915	2.18373	1.24118	2.08912	1.76679	0.838027	1.77279	1.57242	0.862139	1.05306	1.15247	2.22364	1.88807	1.8721	2.06078	2.25231	2.63122	2.73684	4.11108	1.30519	1.23406	2.23588	2.58137	3.01308	1.50008	1.88545	2.2088
GYPSY7_I	6.15131	4.93651	6.22967	4.8965	5.91224	5.49831	5.8292	5.56541	5.95687	6.01845	5.20477	4.48665	5.3613	4.59792	5.80862	3.5189	5.47964	5.61768	4.75429	4.86129	5.49804	5.51642	5.11403	5.48262	5.06102	3.21627	4.24262	5.75978	5.72964	5.50498	4.56483	6.43682	4.65252	5.38648	4.88071	4.43283	4.68711	5.1826	4.80722	5.30958	5.33659	5.29941	5.9933	5.88242	5.57698	5.89996	5.54715	3.28557	6.27731
GYPSY7_LTR	1.78125	0.762796	1.68237	0.53884	1.39556	0.853951	1.53622	1.41599	1.41736	1.32967	1.07704	0.0618552	1.02112	0.280952	1.16352	-0.309261	0.994612	1.23236	0.523497	0.38275	1.23607	1.10281	0.615268	0.964911	0.865707	-0.471669	0.176317	1.50895	1.15945	1.01332	0.292267	1.89044	0.520816	0.740816	0.838984	0.0575806	0.414993	0.865853	-0.222572	1.3086	1.18067	1.10178	1.40371	1.51439	0.855398	1.57114	1.27318	-1.49114	1.93851
GYPSY8_I	3.28678	3.25946	3.3735	3.36004	3.45587	3.36512	3.44087	3.2117	3.26964	3.52517	3.38633	3.57328	3.38746	3.23689	3.43346	3.43106	3.19433	3.30897	3.36603	3.44441	3.07042	3.26717	3.15408	3.26803	3.42496	3.32725	3.41404	3.38782	3.33959	3.39251	3.21257	3.50935	3.44043	3.20862	3.43612	3.65204	3.28773	3.17449	3.21582	3.26831	3.37187	3.57563	3.31975	3.38407	3.25963	3.55212	3.30439	3.33699	3.13545
GYPSY8_LTR	2.00004	1.76808	2.09156	1.77928	1.82568	1.68922	1.91497	1.85774	1.79261	1.66277	1.92145	1.37809	1.6559	1.71278	1.69405	1.95816	1.56313	1.98339	1.79307	1.6092	1.79303	1.47887	1.68521	1.76529	1.82357	1.77197	2.01369	2.04221	1.85134	1.71927	1.68867	1.90675	1.92346	1.73785	1.76832	1.74981	1.83157	1.5589	1.88103	1.67658	1.43951	1.94529	1.99611	1.71586	1.79979	1.78523	1.58361	1.77076	1.61396
GYPSY9_I	2.64666	1.98409	2.52004	3.0009	3.28328	3.06638	2.61315	2.30291	2.3925	2.7041	2.81691	2.8731	2.36149	1.69848	2.29861	3.06475	2.66516	2.56919	3.25984	2.76394	3.10263	2.54639	3.00667	2.45372	2.47863	2.30014	2.43889	2.25739	2.5048	2.6979	3.01438	2.73885	2.98922	2.33244	3.53109	3.36057	3.1436	2.39914	2.71477	2.33422	2.85572	2.46976	2.61513	2.81167	2.39096	2.43691	3.02022	2.86946	1.9971
GYPSY9_LTR	0.819042	0.53207	0.585068	0.682753	0.988161	0.744108	0.328985	0.345035	0.72372	0.134743	0.599024	0.645006	-0.0189147	0.551871	0.0588862	0.968935	0.327418	0.700826	0.747169	0.61761	0.870727	0.190648	0.735145	0.519773	0.297979	0.722063	0.761574	0.594956	0.425129	0.470607	0.571556	0.380172	0.564569	0.502224	0.828196	0.618276	0.873754	0.33469	0.774109	0.420915	-0.198036	0.59182	0.580852	0.34908	0.329079	0.496364	0.414076	0.841138	0.337339
GYPSY_I	5.27456	4.34929	4.72424	4.75524	4.9925	4.77775	4.93811	4.34079	5.93326	5.1099	4.68198	4.94931	5.286	6.0051	4.67493	6.56569	7.00515	5.20688	4.88	5.39506	4.82425	5.44577	4.30493	5.69404	4.26281	5.10435	5.40564	5.50196	4.32321	5.05351	4.37902	4.99005	5.12259	5.20042	5.02922	4.59611	5.15749	4.43355	5.22951	4.57069	4.6616	4.55922	4.81011	4.92114	7.15276	5.47304	5.60452	4.86025	4.88918
GYPSY_LTR	1.18117	0.0217892	1.27138	0.793574	1.30434	1.69329	1.51317	0.728765	1.78615	2.51531	0.668804	0.94543	1.54259	2.57434	1.14454	2.31268	2.46605	1.57898	0.950046	1.92903	0.574976	1.40453	0.460937	2.10327	0.795151	-0.364595	2.0861	2.20619	1.58704	1.21237	0.547331	1.2253	1.77858	1.52989	1.36662	0.808114	1.18049	0.818668	1.67544	0.720456	1.6071	1.00239	1.65161	0.959609	2.76816	1.63639	2.07782	1.36049	0.113854
HELENA_RT	3.72326	3.21104	4.02513	2.78243	3.6401	3.26163	3.81728	4.13831	3.64291	4.35474	3.57444	3.57499	3.56669	3.21872	3.74675	1.73084	3.76741	3.50805	2.88807	3.25335	3.55848	3.34433	2.90651	3.95158	3.67931	1.94004	2.52285	3.5956	3.37959	3.70393	3.03865	3.9786	2.61433	3.76146	3.02092	2.93128	2.97562	3.1435	2.59268	3.29559	3.13631	3.64559	3.5993	3.65488	3.54953	3.88026	3.5901	2.03638	4.29992
HETA	5.58048	6.33178	6.08581	5.7565	6.57843	6.55066	5.84088	5.17861	6.28135	6.06773	5.62713	7.35366	5.97778	6.06403	5.83169	5.8642	6.11728	6.88387	5.82673	6.41161	5.31666	5.92758	6.72096	5.95766	6.231	6.07385	6.34221	6.01136	5.97495	5.90163	6.37346	6.12199	5.80458	5.86586	6.19078	6.65396	6.70702	6.06516	6.36897	6.51018	6.0523	5.81652	5.98551	6.20269	6.26105	6.21342	6.01434	6.91979	5.98023
HETRP_DM	2.14662	1.67632	3.17598	3.023	2.78308	2.68175	2.83068	1.08059	3.48956	0.811855	3.1536	3.15332	3.0911	0.0108829	3.1717	-0.154938	2.97482	3.11915	1.38304	2.16496	0.598146	2.69305	2.14437	0.619493	3.68604	0.0802449	2.95085	2.46531	1.83366	1.04512	3.5073	1.54991	2.82451	0.781321	2.96171	1.22904	0.566691	2.54706	2.37303	3.54576	1.73349	3.6269	1.04377	1.78914	2.67938	1.03754	2.14074	2.71452	2.77075
HMSBEAGLE_I	8.32302	6.41106	8.04143	7.08215	7.42125	7.48889	6.79078	6.83666	6.96284	5.67349	7.39155	6.68013	8.2249	6.83218	6.83053	6.19104	7.29793	8.50381	6.85313	6.72471	9.09476	5.51977	7.393	7.95278	6.41502	7.71752	6.34047	7.89576	8.85041	6.98295	6.76206	7.17503	7.45525	7.59892	7.05298	6.46371	8.58295	6.48607	7.50693	6.60911	6.80308	5.50959	9.62418	7.22746	6.91481	8.30019	5.9608	7.182	8.02981
HOBO	4.67553	4.55492	4.79279	4.17286	4.87242	4.45178	4.72496	5.02134	6.53425	5.62472	4.70765	5.58931	4.05023	4.18174	4.71756	4.69082	4.26027	4.63377	4.7578	5.48144	4.52073	4.64207	4.99492	4.77481	4.22551	4.28585	5.34337	5.42272	5.22865	5.09286	4.22052	4.94458	4.69122	4.72834	5.43107	4.44832	4.27881	6.73945	4.66648	5.32718	4.35076	5.76016	5.01581	4.45395	5.325	5.57652	5.28418	5.5051	5.17277
IDEFIX_I	7.34744	7.64645	7.81455	7.79367	7.53161	7.27805	7.25449	7.10954	8.98791	7.28764	7.41634	7.53398	8.03371	7.2967	7.76084	7.82804	7.95083	7.69174	7.81484	7.49979	8.66554	8.33785	7.31466	7.77669	7.53444	7.28034	7.78011	7.7761	7.84283	7.87651	7.33161	7.40219	7.70393	8.47912	7.29952	7.3889	7.31577	7.72775	7.49073	7.42931	7.56113	7.33756	10.0108	7.05932	7.59374	7.47782	7.46013	7.86517	7.88173
IDEFIX_LTR	4.93865	5.12794	5.28518	5.23418	5.08718	5.08556	4.81699	4.92976	5.53649	5.0507	5.05773	5.17424	5.45913	4.92313	5.02408	5.05689	5.27586	5.24001	5.23749	4.87568	5.56982	5.34246	4.90295	5.17973	5.12769	4.86816	5.29467	5.23609	5.19049	5.19301	4.95711	5.04157	5.11814	5.22494	4.95116	4.96779	4.99742	5.15101	5.12237	5.11953	5.15123	4.9426	5.39367	4.85576	5.08813	4.96867	4.98323	5.31621	5.01197
I_DM	5.75069	5.75155	5.73068	5.92989	5.77734	6.03653	5.75542	5.85792	6.0841	5.94286	5.68341	6.01948	5.79448	5.76318	5.71388	5.62381	5.80253	6.04181	5.94403	6.13666	5.80605	5.74844	5.74814	5.6893	5.851	5.61709	5.83198	6.09361	5.92107	5.79388	5.85579	5.78377	6.05254	5.91017	6.02322	5.73335	5.96864	5.80916	5.72373	5.99726	5.73773	5.82407	5.82746	5.99583	5.9104	5.64527	5.86441	5.87314	5.8554
INVADER1_I	5.12648	4.9869	5.26213	4.67587	5.33761	4.56418	5.18008	4.99999	4.83346	5.18277	4.82275	4.77512	4.84509	5.06929	4.98095	5.17065	4.93577	4.99784	4.82329	5.29343	5.75975	4.49674	4.78094	5.4359	5.71028	4.70463	6.58505	5.12582	4.38559	5.24415	4.493	5.51072	5.22848	4.42989	4.96608	5.11204	4.87345	6.01414	5.13088	4.7489	4.95472	4.40049	5.67132	4.76551	5.4912	4.78613	5.86877	4.88036	6.23603
INVADER1_LTR	3.42124	2.89257	3.34589	3.03113	3.31689	2.94884	3.28649	3.34255	3.00038	3.2136	3.31067	3.25651	3.05397	3.02553	3.29768	3.33799	2.98753	3.1827	3.5518	3.62799	3.56459	2.99772	3.24582	3.4154	3.65387	3.00159	4.14233	3.13974	2.78274	3.44427	2.78369	3.50611	3.27303	3.567	3.11019	3.16825	3.09514	3.81176	3.11965	3.08458	3.0369	3.09223	3.5812	3.54964	3.23136	3.10904	3.71023	2.99409	3.97815
INVADER2_I	6.40009	6.24647	6.28499	6.22006	6.15978	6.17425	6.16746	6.38586	6.33114	6.15843	6.05299	6.16265	6.28878	6.15939	6.24552	5.97335	6.33915	6.27239	6.40713	6.29747	6.1784	6.14851	6.15342	6.31853	6.11664	6.26228	6.24658	6.30585	6.21583	6.12014	6.18088	6.28824	6.31438	6.20944	6.20463	6.11157	6.1883	6.07735	6.30005	6.33213	6.14357	6.31703	6.19213	6.21147	6.23607	6.06082	6.32521	6.16322	6.14234
INVADER2_LTR	3.03404	2.96934	2.91697	2.82396	2.85917	2.86026	2.93737	3.09485	2.99212	2.95217	2.91486	2.90523	3.00938	2.94863	2.95443	2.88332	2.97795	2.85764	3.01848	2.90326	2.99053	2.82968	2.98585	3.04215	2.82965	2.96717	2.9735	2.97592	2.9089	2.96089	3.0019	2.90228	2.89054	2.91265	2.81173	2.7515	2.94641	2.86015	2.97846	2.94441	3.08241	2.93575	2.94014	2.9072	2.88479	2.85636	2.8777	2.9536	2.85794
INVADER3_I	4.99403	5.07041	4.833	5.15617	5.02747	5.32875	4.61416	5.24484	4.78908	5.22114	4.9082	5.33341	5.32768	5.06036	4.7903	5.306	5.00623	5.15458	5.07994	4.88956	5.06999	5.73008	4.9912	5.35275	5.17367	4.55295	4.99591	5.08538	4.84892	5.11912	5.23687	5.31199	4.9477	5.00537	4.87775	4.97687	5.03706	5.00672	5.31254	4.99851	4.70064	4.90019	4.93415	4.86888	4.95304	4.9507	4.79545	5.15664	5.19441
INVADER3_LTR	1.42586	1.35266	1.38197	1.66583	1.52528	1.61148	1.29641	1.82255	1.51944	1.63819	1.43363	1.50902	1.79324	1.36762	1.41438	1.74191	1.56396	1.52655	1.53782	1.70082	1.59439	1.76432	1.37088	1.62652	1.52675	1.43732	1.6011	1.45179	1.48954	1.54957	1.55924	1.53466	1.39553	1.32075	1.19464	1.53846	1.33054	1.50657	1.43361	1.38437	1.28627	1.55257	1.19947	1.64658	1.3836	1.62493	1.30906	2.05483	1.68731
INVADER4_I	5.15618	6.92646	5.26475	5.00704	5.68735	4.58708	4.74881	5.67759	5.24936	5.3414	4.34635	4.74854	5.36376	4.90248	5.36992	5.35327	4.34086	4.46811	4.56662	5.03001	4.78131	4.93648	5.08056	6.05252	5.16757	5.5084	4.54716	5.40642	4.87227	6.14641	5.47823	4.73368	4.29716	6.78603	4.86945	5.18694	5.05397	5.89936	4.89477	4.49502	4.92708	4.4615	5.06914	4.98778	4.98062	5.20401	4.94515	4.12492	6.61287
INVADER4_LTR	2.91202	3.9605	2.92389	2.92461	3.2641	2.7846	2.60829	3.29041	3.0775	2.91143	2.16107	2.95175	3.22824	3.01125	3.03963	2.7953	2.29056	2.59776	2.60657	2.89184	2.98426	2.75584	2.79563	3.65384	3.07506	3.61519	2.70273	3.16059	2.8973	3.52102	3.30653	2.63041	2.60896	3.64026	2.69815	2.86496	2.8392	3.25401	2.7386	2.8315	2.96548	2.47124	2.99173	2.93035	2.56281	2.88684	2.91441	2.02707	3.4149
INVADER5_I	1.367	1.38088	1.42395	1.27528	1.49783	1.40089	1.31677	1.405	1.31788	1.49804	1.27872	1.3812	1.3651	1.40835	1.4449	1.52918	1.32895	1.43739	1.44064	1.38063	1.40533	1.34634	1.53648	1.30898	1.41091	1.33356	1.51027	1.39569	1.39879	1.31328	1.27622	1.52568	1.29433	1.20858	1.32852	1.31319	1.49861	1.38767	1.32519	1.40083	1.43277	1.37481	1.45203	1.2851	1.32902	1.30264	1.27291	1.29342	1.46676
INVADER6_I	3.57837	3.98381	4.33873	4.09779	4.21736	3.48768	3.85587	5.7253	4.32527	5.00399	4.16596	4.25794	3.8247	3.43995	3.85968	2.88758	4.56109	4.03767	4.02288	4.06297	5.08444	3.77793	4.24008	4.59393	4.5039	2.37245	3.191	4.29465	3.85836	3.81632	3.64159	3.37	3.25539	4.11364	4.56806	4.09776	4.51365	4.44765	3.0007	4.18769	3.51126	4.29638	4.02795	4.2213	3.77875	4.32563	4.39246	1.64662	4.51364
INVADER6_LTR	1.21567	1.62897	1.691	1.76099	1.66894	1.1387	1.08953	2.44179	1.87563	1.97605	1.94336	1.79307	1.11168	0.706191	1.75303	0.222468	2.33655	1.65004	1.50482	1.45558	2.25777	1.53478	1.47214	2.14302	2.51387	0.376104	1.03809	1.8752	1.02813	1.18003	1.27859	0.941365	0.683248	2.00912	1.85996	1.33187	1.61302	1.79507	0.505526	1.91028	1.60978	1.77065	1.69478	1.6937	1.49512	1.95656	1.89567	-0.558259	1.27946
IVK_DM	4.98385	4.75815	4.71354	4.95055	4.99199	5.14275	4.88021	4.96761	5.14264	5.1334	4.66369	4.81605	4.83227	5.03719	4.87211	5.07397	5.04574	5.23886	4.96685	5.56082	4.83756	4.81538	4.62182	4.97347	4.78388	4.88765	4.89338	5.45857	5.05512	4.66075	4.95812	4.82836	4.95243	4.8678	5.09108	5.23021	5.04263	4.94323	4.83195	4.9668	4.76007	4.903	5.0982	5.20412	4.7611	5.05622	4.9088	4.91254	5.33302
Jockey	7.90167	7.97256	7.81158	8.28299	6.75647	8.04722	8.02075	7.87024	7.9503	7.72498	8.54768	6.91966	7.73152	9.02138	8.33606	8.65429	7.29941	7.7289	7.00506	7.1688	8.39885	7.33255	8.10153	7.91132	8.0521	8.90498	7.57058	7.22518	8.28369	7.18218	7.59726	8.11867	7.32221	7.52239	8.55505	8.60847	9.1952	8.42136	7.21815	8.4367	7.74404	7.82819	6.66527	7.15449	8.50965	7.62059	7.77879	9.26149	7.60836
JOCKEY2	4.18667	4.05347	3.90314	3.97226	4.03941	4.05211	4.02743	4.08292	3.84902	3.99678	4.05882	4.03994	4.11426	4.21949	4.01673	4.14656	3.86571	4.0393	4.07822	3.85328	3.9403	3.93362	4.0272	4.09458	3.95932	3.99389	4.29028	4.08059	4.00594	3.98308	4.10567	4.22773	4.18169	3.89618	4.07579	4.22739	3.99089	4.08625	4.00947	3.96321	4.07957	4.04331	4.12071	3.88546	4.07273	4.04942	3.90842	4.08953	3.98335
LOOPER1_DM	2.89159	3.3207	2.97463	2.91201	2.84355	2.97138	2.73648	3.00754	2.96007	2.99323	2.86734	2.72412	2.99211	3.29246	3.02467	2.9513	3.31229	2.74858	2.97276	2.82195	3.0095	3.01104	3.12371	3.17345	2.94875	2.94065	3.09158	3.01626	2.74908	2.96006	2.85837	2.43042	2.9945	2.95146	2.89702	2.72036	3.10747	2.95947	3.11246	3.11098	2.63973	2.84807	2.90729	2.9069	3.04365	3.11818	3.06788	3.10223	3.23673
LTRMDG3_DM	1.56504	3.57674	3.72964	1.80232	2.23934	2.30638	2.65276	2.68987	1.94998	3.1475	2.69087	5.85495	3.80465	1.62578	2.59025	2.72415	2.88639	1.93172	2.73146	2.0057	2.12149	2.6832	4.02599	2.36851	3.42774	2.60359	1.60306	2.45052	2.52497	2.34815	3.40056	2.49127	2.91009	1.40267	3.55002	2.04581	3.01159	1.90761	2.83677	2.27371	2.27612	1.43522	2.06199	1.96286	2.10888	1.11475	1.98982	2.29523	1.54716
M4DM	4.60558	5.09668	4.53619	5.22258	5.11013	5.6077	4.49525	5.33858	4.61549	5.15038	5.1458	5.03454	4.79989	4.61004	5.09058	4.25235	4.79101	4.94474	5.21494	4.79935	5.09191	5.16589	5.39389	5.25162	5.37183	4.51718	4.86842	5.09299	4.77859	6.1033	5.4696	4.77426	4.91962	4.94708	4.77818	4.40326	5.09883	4.80542	6.95475	5.43428	4.55075	5.77055	5.46245	4.4125	4.86004	5.00237	4.79453	5.05997	4.66735
MARINER2_DM	4.18935	4.01288	4.1232	3.98522	4.33358	4.03781	3.98665	4.04723	3.77665	3.76595	4.2644	4.1212	3.78571	4.17849	3.9801	4.41011	4.13628	4.04603	3.86352	3.9082	4.00242	3.84318	4.07401	4.15139	4.09136	4.18154	4.14743	3.90015	4.12949	4.00618	4.22063	4.33854	4.04847	3.89487	4.04249	4.45917	4.04051	4.24659	4.23913	3.96567	4.06021	3.96302	3.89361	3.98595	4.03358	4.04732	3.96709	4.0376	4.09297
MAX_I	7.53931	6.27225	7.91387	8.8033	6.8658	5.80225	5.99371	5.36527	7.279	6.54725	5.04525	9.20656	6.48933	7.02972	6.00294	8.04721	7.15605	7.81692	6.74732	8.81468	6.9557	8.99313	7.05355	5.44485	6.70468	7.52077	6.02713	7.226	5.36647	6.21498	5.33543	7.22546	5.7687	6.22506	6.95876	7.23287	6.14349	6.13248	6.16458	6.85581	8.53732	6.53139	6.82484	7.45195	6.23158	8.55108	8.04304	8.55038	7.20049
MAX_LTR	2.89082	1.66493	2.7646	3.84294	2.37326	1.43665	2.07446	1.32238	2.66407	1.98689	1.20148	4.16601	1.8288	2.05934	1.2066	3.03276	2.49163	2.59608	2.11234	3.44599	2.10374	4.44181	2.72672	1.32416	2.15551	2.59396	1.7488	1.99205	1.19541	2.50391	1.58809	2.3523	1.66504	1.87021	2.18053	2.56479	1.94741	2.30568	1.65763	2.1349	3.70127	1.63175	2.31009	2.65085	1.82578	3.22786	3.35665	2.90441	2.27822
MDG1_I	7.02113	6.61882	7.71725	7.24808	7.11517	7.89868	6.95593	7.72259	7.26098	7.23999	5.83692	7.76804	7.33351	7.38562	7.11927	7.47233	6.69511	6.69797	7.2095	6.45653	7.67952	7.2672	6.78353	6.66165	8.43556	9.50522	7.87563	7.76175	7.38918	7.63758	8.44775	6.91674	7.56349	9.67229	7.56263	6.51696	6.68264	8.0528	6.65052	6.59757	8.91352	7.19193	8.00529	7.01438	6.94597	6.77963	6.09773	6.77145	7.52493
MDG1_LTR	3.16452	3.30838	4.05407	3.61589	3.35893	4.10681	3.96199	3.94801	3.52973	4.16671	2.5942	4.27901	4.09877	3.63202	3.32345	3.91479	3.25944	3.23422	3.73877	3.65035	3.94647	3.92643	3.7018	3.46919	4.65887	5.41098	4.45224	4.07611	3.7196	3.91124	4.51832	3.26198	3.8032	5.2129	3.34181	3.37935	3.4005	4.11624	3.3324	3.28233	5.00318	3.5183	4.11931	3.33081	3.27702	3.43927	2.54548	3.11559	3.83524
MDG3_DM	4.67465	6.90675	7.20261	5.42471	5.53982	6.28124	6.04833	5.86516	5.25612	6.40571	5.80053	10.0363	8.45214	4.34677	5.61771	5.71617	6.21863	4.65381	5.67462	5.12008	5.21092	7.10626	7.69597	5.33507	8.20562	5.81791	4.83945	5.3935	5.8012	5.90379	6.62945	5.21893	5.19087	4.33405	6.64573	5.02956	6.17142	5.62666	6.6308	4.95118	5.22248	5.06954	5.27307	4.41342	5.26256	4.43649	5.43845	5.33969	4.96077
MICROPIA_I	6.15016	8.19668	6.03516	7.37371	6.15868	6.20049	5.49966	6.15836	5.62116	6.00532	5.92243	6.6929	6.07297	7.14828	8.39848	6.35013	6.35167	6.82101	6.37132	6.46272	6.4598	5.66563	6.33561	9.57061	6.0164	7.14965	6.2799	6.30398	5.50004	8.66149	5.82955	5.46511	6.12739	6.45177	5.87586	6.56428	5.89571	6.26476	6.75694	6.2659	6.41197	6.95654	6.10341	5.8985	6.114	6.28216	6.64215	7.10293	6.01693
MICROPIA_LTR	3.86034	5.09141	3.7238	4.46777	3.85621	4.00531	3.22218	3.71215	3.3983	3.82112	3.38452	3.97439	3.6414	4.19587	5.4191	3.88532	3.91885	4.20525	3.87882	3.96995	3.92044	2.90148	3.57173	6.02727	3.87104	4.36772	3.67091	3.94909	3.20993	6.20882	3.58239	3.33664	3.70463	4.02634	3.47796	3.68856	3.6532	3.31842	3.84044	3.83174	4.0322	4.24839	3.58343	3.52549	3.49043	3.33435	3.86182	4.4146	3.43022
NOMAD_I	7.97562	6.86811	7.05681	7.49291	7.92728	8.08051	6.83613	7.42618	7.07381	7.15481	7.94671	7.43248	7.28249	8.03661	7.58465	8.44481	7.36921	7.53471	7.97198	7.08128	7.62381	7.52449	6.91135	6.8663	7.66761	7.52483	7.90939	7.45689	7.28745	8.1281	7.82743	7.21651	7.67146	7.97621	7.47979	7.88104	7.87116	6.9811	7.95603	7.69996	7.08935	7.32644	6.7968	7.07876	7.8744	7.68439	7.56195	7.86327	8.82466
NOMAD_LTR	5.68395	4.35017	5.07346	4.63594	5.44998	5.93128	4.72995	4.24361	4.70267	5.01276	4.85498	4.50289	4.83642	4.89901	5.06432	5.84395	5.164	5.50295	5.52553	5.10096	5.29815	5.37391	5.10479	4.53956	5.08162	5.38182	5.41723	5.36041	4.54037	5.98723	5.48934	5.45578	5.03835	5.48826	4.8115	5.43977	5.46511	4.46293	5.09395	4.76639	4.73565	4.72491	4.03755	4.57026	5.20328	5.19004	5.15229	5.85012	6.51312
PLACW_DM	1.2458	1.60264	1.5217	1.57137	1.45537	1.3621	1.53861	1.40775	1.42896	1.5453	1.58187	1.48192	1.62607	1.64868	1.5547	1.66536	1.63865	1.7427	1.32038	1.15273	1.63558	1.61843	1.61252	1.74201	1.67641	1.55633	1.82622	1.66774	1.38729	1.49252	1.81332	1.63059	1.62452	1.54662	1.31748	1.55997	1.30741	1.60644	1.59032	1.59243	1.16523	1.60303	1.44046	1.27935	1.56153	1.40752	1.48444	1.71199	1.86905
POGO	6.31853	4.23467	3.9888	3.48565	3.99087	3.18658	4.27706	3.5522	3.37581	3.19559	3.48955	4.4833	3.44556	3.75003	3.13858	3.3255	4.41272	4.02192	4.26195	3.95461	3.43303	3.56857	3.7605	4.55191	3.23723	4.39661	3.54961	4.31969	3.42647	4.58236	3.38103	3.75061	4.36587	3.16092	3.61775	3.39696	3.7464	5.80458	4.18832	2.88843	2.32236	3.79529	3.71777	3.40076	2.82809	3.86321	3.05314	3.82096	3.30078
POGON1	0.19634	2.09988	2.01319	0.458264	2.58802	0.853558	3.05153	0.722178	1.06129	0.516616	1.48313	2.05478	-0.0478375	1.94542	2.59118	0.576696	1.39583	1.03751	2.34883	3.28836	2.68098	1.88932	2.06234	0.463514	1.46443	0.511939	2.34427	1.62226	2.39406	2.07886	1.18216	2.22311	2.56957	1.598	1.0718	1.47441	2.1477	1.42676	1.95061	0.524043	1.57238	3.399	2.39403	0.523205	0.78786	0.240445	-0.365091	2.60998	3.46588
PROTOP,PROTOP_A,PROTOP_B	7.92836	7.78981	7.88056	7.86229	7.97086	7.81739	7.86889	8.08907	7.78384	7.84783	7.83218	7.97305	7.95487	7.96769	7.94999	7.89749	7.89573	7.88807	7.84751	7.6783	7.94969	7.85889	7.97357	8.00754	7.90855	7.96133	7.98679	7.89028	7.84956	8.02032	7.99001	7.82099	7.981	7.98474	7.79006	7.87912	7.90038	7.8769	7.84664	7.94715	7.73011	7.82764	7.82704	7.7783	7.84507	7.87518	7.81742	8.09556	8.11238
QUASIMODO2-I_DM	5.4756	5.13267	5.38754	5.66108	5.86419	5.84843	5.3522	5.56216	5.4538	5.51702	5.63027	5.1817	5.87964	5.54716	5.58519	5.72148	5.59894	5.9978	5.95502	5.62329	5.68887	5.50855	5.30428	5.45651	5.72355	5.47401	5.95792	5.90833	5.66432	5.59441	5.28933	5.94474	5.83169	5.77168	5.64736	5.86198	5.67108	5.68724	5.68287	5.44553	5.6097	5.49099	5.62122	5.49222	5.8218	5.48967	5.59469	5.80991	5.2533
QUASIMODO2-LTR_DM	4.69476	4.69228	4.64038	4.69923	4.76412	4.815	4.57737	4.77787	4.5946	4.57532	4.75025	4.60797	4.74532	4.8571	4.70229	4.72315	4.60788	4.88913	4.76234	4.59038	4.76418	4.77982	4.63039	4.72375	4.83444	4.73947	4.95381	4.76222	4.7312	4.65713	4.72319	4.89127	4.83955	4.75393	4.64239	4.80341	4.77513	4.88102	4.81055	4.65927	4.66921	4.6679	4.72827	4.61171	4.87134	4.78538	4.62119	4.87402	4.62873
QUASIMODO_I	7.56445	7.56734	7.37001	7.55195	7.69937	7.68182	7.39129	7.55023	7.50501	7.43695	7.55538	7.55728	7.74858	7.37958	7.53369	7.89932	7.88353	7.80675	7.90225	7.64884	7.76777	7.61822	7.67629	7.71135	7.78274	7.50664	7.88369	7.83267	7.58771	7.75325	7.64367	7.71498	7.76359	7.7117	7.48441	7.66111	7.53821	7.85134	7.82118	7.50348	7.46737	7.57313	7.58127	7.23636	7.67722	7.6131	7.58954	7.68758	7.59048
QUASIMODO_LTR	5.6469	5.62026	5.62705	5.57175	5.78089	5.74871	5.50753	5.53221	5.59171	5.54498	5.64673	5.62836	5.71022	5.63046	5.58462	5.84679	5.86165	5.8274	5.7728	5.68021	5.78128	5.77487	5.70813	5.62762	5.80059	5.29415	5.91873	5.7927	5.4641	5.9946	5.68212	5.88917	5.71615	5.74836	5.5811	5.86717	5.67239	5.80067	5.67869	5.50258	5.75529	5.52954	5.67374	5.47004	5.73114	5.76594	5.71018	5.49334	5.65909
R1-2_DM	2.15347	2.11958	2.27798	2.06468	2.34268	2.36882	2.26107	2.04663	2.16928	2.2361	2.33275	2.24651	2.29432	2.1726	2.12362	2.46772	2.15637	2.21795	2.10509	2.18103	2.12044	2.20889	2.24756	2.04769	2.08152	2.37967	2.25605	2.15793	2.43015	2.18101	2.27219	2.21454	2.20694	2.13248	2.27554	2.15573	2.22026	2.16805	2.20813	2.05137	2.4843	2.24998	2.25024	2.32278	2.38678	2.30849	2.19241	2.2662	2.3325
R1_DM	4.83647	4.72612	4.50826	7.27823	5.06208	5.22988	5.56742	4.95163	5.03267	5.39983	7.01067	6.05405	5.02108	4.31699	6.34085	5.68558	4.73755	5.81323	4.9697	6.25544	4.42894	5.50937	5.08761	4.47608	6.13819	6.20484	5.44548	5.00726	5.67963	6.61714	8.57965	4.48886	5.10565	5.69443	5.33286	5.21215	5.43052	5.51369	4.68041	4.42886	6.20416	5.20267	4.11795	5.62151	5.94777	5.15884	5.44494	5.07516	5.05762
R2_DM	4.51045	7.4061	6.8045	6.74113	5.08683	5.91885	5.51572	6.81475	6.03335	6.68297	3.32701	5.95664	7.48739	5.75919	6.60732	5.43782	3.8055	6.9967	6.28457	5.17909	7.04674	4.80354	2.92704	6.39747	9.57245	4.01779	4.27154	4.15591	6.23153	8.85992	5.49717	7.96142	6.23868	7.72032	5.17352	7.21311	5.03232	7.32113	5.86808	7.09849	7.81342	6.50183	7.07772	4.86846	5.94278	5.95517	3.70636	4.96425	5.98708
ROOA_I	6.79039	6.76316	6.79011	6.55934	6.77853	6.59838	6.64501	6.7586	6.81536	6.33306	6.91009	6.75673	6.83716	6.81029	6.75325	6.63675	6.89665	6.73787	6.87147	6.3481	6.39391	6.63482	6.79102	7.08844	6.82587	6.57842	6.87655	6.71462	6.85235	6.95933	6.94832	6.68732	6.91377	6.64096	6.80133	6.9972	6.79126	6.63444	6.80825	7.03064	6.71964	6.81691	6.56585	6.75067	6.76203	6.83523	6.66829	6.85784	6.99963
ROOA_LTR	3.52217	3.42515	3.41902	3.27489	3.43645	3.44111	3.44816	3.40103	3.54604	3.55637	3.41579	3.35345	3.63904	3.94845	3.60647	3.59994	3.38737	3.59843	3.27997	3.31476	3.14304	3.59735	3.43098	3.51081	3.46462	3.23924	3.78549	3.5849	3.81762	3.66865	3.59767	3.66658	3.33222	3.24953	3.42319	3.47402	3.38579	3.40805	3.51551	3.43103	3.48247	3.34893	3.62685	3.47125	3.56839	3.45516	3.34556	3.61449	3.62081
ROO_I	9.76888	10.0209	10.0366	10.2035	10.3277	10.0142	9.95543	9.9856	9.88589	9.71329	9.83718	10.0258	9.58151	9.84733	9.81208	10.0444	10.3762	9.01469	9.51985	8.76654	8.77688	9.89975	9.42427	9.23412	10.4531	10.2507	9.90056	10.3257	10.4354	9.90363	10.3338	10.3296	10.6079	10.1538	9.18345	10.0992	10.001	9.92487	10.2622	10.5576	10.0969	10.381	10.2968	10.3152	11.0521	10.5801	10.5527	9.9815	10.2017
ROO_LTR	5.86099	5.38326	5.76148	6.04326	5.70002	5.45165	6.32551	5.89672	5.2449	5.76863	5.89078	5.84711	6.51652	6.0818	5.6031	5.81031	5.71985	5.15865	5.58286	5.28486	5.37595	5.67645	5.90836	5.61088	6.16887	5.97568	5.73898	6.12141	5.9744	5.83119	5.5295	5.92172	6.02004	5.71026	5.59889	5.91006	6.05025	5.73942	5.92323	6.0142	5.66132	6.08831	5.72732	5.56879	5.98361	5.85731	5.85103	5.50311	5.76996
ROVER_DM	5.10657	5.50908	4.86127	5.47367	5.34527	5.78069	5.53108	5.24151	5.51889	5.4279	5.41478	5.21719	5.96948	4.77012	5.4214	5.71213	6.13822	5.46164	5.48146	5.78246	5.05749	5.83472	4.6773	5.26396	5.17468	5.68232	6.45483	6.30332	5.97267	5.96673	5.54323	5.39016	5.39359	5.27648	5.97573	5.47904	5.63545	5.56676	6.8163	5.37722	4.99432	5.40855	5.08652	5.45466	5.66804	4.97924	5.63626	5.46191	5.36724
RSP	-2.48472	-2.30455	-1.82045	-1.94533	-2.83886	-2.24531	-2.40909	-2.33112	-2.12914	-2.22033	-2.19208	-1.92578	-3.6184	-2.46525	-2.5472	-2.19395	-1.83197	-2.17266	-2.07134	-2.36447	-2.43424	-2.59135	-3.47988	-2.65733	-1.98478	-2.44275	-2.45597	-2.11659	-2.1674	-2.02694	-2.11614	-2.2256	-3.05142	-2.42698	-2.43551	-2.22783	-3.72471	-2.69378	-2.48851	-2.41809	-3.37324	-2.69635	-2.4432	-3.60534	-3.67084	-2.12744	-2.55119	-2.54678	-2.91926
S2_DM	3.03801	2.99431	2.91497	3.13794	2.89566	3.10514	2.92876	2.8881	2.83174	3.0825	3.08394	3.15885	3.05145	3.29057	2.92942	3.0485	3.05578	2.99727	3.29245	2.87104	2.77584	3.34921	3.30482	3.49833	3.01353	3.2364	2.80918	3.13893	3.11616	3.21723	3.38438	3.08868	3.3291	3.15938	2.89125	2.98836	3.22781	2.8906	3.04466	2.91955	3.10113	3.20042	2.98546	2.9763	3.11365	3.30767	3.13964	3.24373	3.37501
SAR2_DM	3.43334	3.34924	3.56706	3.29052	3.65991	3.31372	3.80323	3.40352	3.54078	3.67147	3.39269	3.53635	3.24905	3.75799	3.74497	3.57677	3.29799	3.9653	3.70125	3.24745	3.34203	3.38011	3.40296	3.78194	3.3757	3.52763	3.48888	3.44125	3.62436	3.88409	3.72645	3.38435	3.8773	3.2536	3.55389	3.7799	3.5321	3.53798	3.82323	3.61786	3.33383	3.28411	3.70406	3.26425	3.59855	3.43377	3.48739	3.57589	3.54006
SAR_DM	4.26558	3.87175	4.43149	4.20223	4.49078	4.62446	4.52854	4.21406	4.25448	4.67751	4.23631	4.02494	4.413	4.1166	4.52598	4.22303	4.56174	4.62368	4.50387	4.28346	4.16756	4.23166	4.08735	4.36431	4.25721	3.96532	4.06583	4.10323	4.60848	4.53783	4.3117	4.25157	4.46209	4.14275	4.28292	4.56673	4.18272	4.15464	4.58692	4.0798	4.47598	4.14011	4.44073	4.58851	4.2163	4.46529	4.24808	4.3702	4.46994
S_DM	5.04778	5.43224	5.39909	5.5046	5.61495	5.24224	5.94508	5.96619	5.44181	5.42103	5.61318	5.51719	5.43675	6.75074	5.70427	5.36569	5.64919	5.64689	5.51837	5.5845	5.93428	6.13952	5.59041	6.02074	6.01496	5.53867	5.87569	5.88238	5.909	5.91081	5.90294	5.84699	5.99492	5.91594	6.3641	5.96615	6.14097	5.66183	6.23708	5.51396	5.96118	5.56134	5.85682	5.20923	5.70674	5.85714	5.59894	5.89565	6.76934
STALKER2_I	7.24299	6.38825	7.42885	6.43609	7.34539	8.87914	6.12489	6.08602	7.55823	7.10731	6.73018	6.75199	7.89758	6.01473	7.6049	5.6525	7.44472	5.95234	6.71608	6.71721	5.44438	8.71988	6.8193	7.30782	6.11148	6.47851	5.95989	6.56514	5.87769	7.65127	7.64757	7.32291	7.11651	6.56822	5.58834	6.97987	6.23094	7.81388	5.85619	7.35384	7.36385	6.29243	8.22886	7.37089	7.25902	5.59207	6.76159	6.21131	5.51103
STALKER2_LTR	3.50454	2.86837	3.80106	2.98295	3.84049	4.67004	2.56124	2.62766	3.53205	3.10966	3.75384	3.38661	4.17977	2.39074	3.41159	2.64717	4.12547	3.42722	3.16671	2.96693	2.57744	4.32472	2.85309	3.62541	2.49941	3.21047	2.64218	2.88499	3.79123	3.67184	3.93387	3.20455	3.86862	3.05453	2.19679	3.75381	3.11923	4.1442	2.27727	3.43873	3.59627	2.94214	4.32817	3.52618	3.2424	6.13552	4.15543	3.48119	1.02653
STALKER3_LTR	-1.01784	-0.67034	-0.409867	-0.438417	-0.221968	-0.403454	-0.523265	-0.570922	-0.248425	-0.519152	-0.655416	-0.470775	-0.508388	-0.329268	-0.315158	-0.645872	-0.660293	-0.540238	-0.431915	-0.404792	-0.631116	-0.82728	-0.880916	-0.475088	-0.682028	-0.617504	-0.596164	-0.529433	-0.593777	-0.644773	-0.646113	-0.372708	-0.523591	-0.631059	-0.331888	-0.582187	-0.446839	-0.617247	-0.601697	-0.487828	-0.714102	-0.724799	-0.528533	-0.760148	-0.328019	-0.567959	-0.724607	-0.66651	-0.745317
STALKER4_I	7.6458	7.30867	7.76681	7.55677	7.81208	7.48631	7.48082	7.5028	7.71288	7.78615	7.56041	7.53249	7.79484	7.74767	7.75447	7.75937	8.16847	7.63543	7.97503	7.91062	7.83617	7.76925	7.35897	8.1683	7.67605	7.86487	7.98622	7.615	7.87616	7.68189	7.32214	7.55658	7.58368	7.62184	7.42239	7.35788	7.57111	8.05249	7.60495	7.75807	7.78063	7.48642	7.59186	7.37631	7.6889	7.60165	7.76453	7.34812	7.26586
STALKER4_LTR	4.68219	4.60317	4.78252	4.67437	4.76707	4.64536	4.58661	4.6553	4.67036	4.82095	4.57671	4.61101	4.76787	4.7408	4.768	4.78205	4.83256	4.68721	4.88124	4.63114	4.83986	4.6375	4.48452	4.97333	4.75263	4.6001	4.91794	4.74472	4.85301	4.66478	4.47498	4.67046	4.74656	4.59722	4.61991	4.51997	4.70921	4.78419	4.83262	4.67824	4.72227	4.55213	4.77029	4.49984	4.81778	4.68985	4.79386	4.61661	4.57135
TABOR_I	6.26834	6.41075	7.01258	6.05117	6.72108	6.68788	6.0404	6.81188	7.90241	6.24551	6.67874	6.24626	7.88548	6.9405	6.36254	6.97568	5.94797	6.33904	6.77824	6.22325	6.32918	6.16929	6.11508	6.31939	6.67019	4.86375	6.53012	6.5223	6.92388	6.5978	8.40004	6.58322	6.60999	6.52548	6.39949	6.55828	6.29842	6.68119	7.33456	8.29879	6.41159	6.03588	6.60444	7.59038	6.73886	6.06967	6.11842	6.66559	6.35867
TABOR_LTR	3.21369	2.77872	2.94527	2.99679	3.31959	3.30323	3.19691	3.41488	3.6096	3.00005	2.78181	2.82647	3.87796	3.37614	2.58614	4.15465	2.31991	3.08558	3.05724	3.12609	3.30865	2.9022	2.50257	2.94013	3.14016	1.95544	3.28382	2.83239	2.8619	2.96534	4.16122	3.19103	3.11928	3.07622	3.15788	3.0656	3.57258	3.04895	3.44984	4.76651	3.22689	2.48074	3.1618	4.04673	3.77182	3.0261	2.97599	3.30494	2.94422
TAHRE	4.16882	4.67039	4.96667	4.6238	4.43836	5.20249	4.20577	4.10927	4.73699	4.35607	4.08496	5.90267	4.42461	4.93352	4.11493	4.5814	4.70844	5.21285	4.28671	5.18544	3.3897	4.58731	5.55763	5.00287	4.37253	4.84973	4.63003	4.67338	4.56065	4.5787	5.27519	4.3847	4.48125	4.83327	4.80757	5.4306	5.36915	4.87344	4.87799	4.89707	4.64031	4.72652	4.95386	4.88608	4.83677	4.80253	4.84709	5.7501	4.13818
TART-A	5.7612	6.85861	6.02507	5.90006	7.31669	6.97132	6.57132	5.50925	6.25246	5.64667	5.60717	7.48745	6.14304	6.91487	6.21561	6.37654	5.93383	7.1565	5.85647	7.41546	6.07373	6.91555	7.5237	6.65474	6.265	7.91877	5.467	6.46928	5.18497	6.69557	6.09819	6.22588	6.02305	6.09334	6.95048	6.60951	6.54381	6.39145	7.15089	6.61007	6.28298	5.58592	6.10819	7.49078	6.47738	6.84207	6.00205	6.60726	5.75713
TART_B1	6.77667	6.85008	7.05438	6.15084	6.35754	5.84612	6.08836	5.44909	6.38092	5.46642	5.70828	7.73764	5.68911	6.76914	6.20609	7.40219	6.47407	6.42469	5.33888	6.13841	6.51137	6.23473	6.60417	6.41285	6.14754	6.82926	4.65942	5.55384	5.99192	6.99446	5.95378	6.1097	6.59131	6.15502	6.15333	6.53048	7.4838	6.60681	5.89799	6.9193	5.53938	5.45661	6.25492	6.61814	7.23809	6.73288	6.4586	8.0566	5.76026
TC1-2_DM	5.74305	5.64492	5.66304	5.56682	5.48465	5.45296	5.55805	5.7564	5.70475	5.29972	5.69016	5.52839	5.53919	5.81054	5.55761	5.62788	5.61936	5.6441	5.57904	5.4016	5.54472	5.58578	5.76897	5.84697	5.59492	5.58063	5.81744	5.73959	5.57504	5.52343	5.75947	5.57531	5.7893	5.74406	5.35647	5.50745	5.5783	5.48973	5.863	5.58693	5.24022	5.64097	5.47333	5.4489	5.73039	5.7218	5.5486	5.63446	5.6426
TC1_DM	5.08243	5.0742	5.07644	5.07705	4.95818	5.09437	5.04801	5.16924	4.97581	5.05341	5.20678	5.04659	4.97854	5.1767	5.02616	4.94645	5.09356	5.09801	5.02392	4.95718	4.95686	4.99233	5.18678	5.23585	5.11877	5.08297	5.15882	5.15893	5.08525	5.2053	5.17174	5.14684	5.15012	5.21913	5.06324	5.24215	5.13735	5.12959	5.04686	5.13893	4.99785	5.07258	5.15988	5.04434	5.12542	5.14492	5.01524	5.3308	5.12595
TIRANT_I	4.79618	5.80748	4.80226	5.64125	6.73951	3.9028	4.80792	6.50422	5.14616	5.02107	3.81813	5.62387	4.50863	6.34575	4.96812	4.42313	4.51348	5.2451	4.93303	5.26711	5.75691	5.00308	5.22171	6.76932	4.15884	6.13045	4.39489	5.42013	5.11084	6.39707	4.33615	4.47352	6.17454	5.27316	4.63594	5.48782	5.03832	5.28773	5.15839	4.81665	4.81623	5.13369	4.5495	5.3793	5.48775	5.59134	5.65951	6.10677	4.72041
TIRANT_LTR	1.79653	2.86295	2.28043	2.96058	3.73038	0.6987	2.92999	4.07325	1.84661	3.20491	1.33212	2.52194	1.40523	3.22789	1.9184	1.41077	2.48885	2.72607	2.45962	2.95409	3.44883	2.52548	2.33636	4.04209	1.03428	3.95729	1.38021	2.08733	2.19917	3.22353	1.79785	1.04081	3.68174	2.64244	2.10499	2.681	2.42725	2.3461	2.69428	2.37221	2.33402	2.4842	1.84943	2.7801	2.99016	3.38856	2.78492	2.91621	1.15289
Transib1	2.46437	2.42155	2.27916	2.19223	2.43535	1.91558	2.3475	2.29077	2.32106	2.61168	2.51728	2.54846	2.47819	2.68662	2.52431	2.49306	2.95405	2.38818	2.60943	2.5191	2.10317	2.31799	2.83053	2.69868	2.47213	2.38348	2.21678	2.2043	2.35721	2.42141	2.49681	2.46337	2.31742	2.24561	2.40717	2.50073	2.14482	2.69587	2.78457	2.31854	2.42441	2.45841	2.39417	2.34403	2.22508	2.30128	2.58888	2.30484	2.34418
TRANSIB2	5.54042	5.51979	5.45436	5.55337	5.29789	5.71424	5.29551	5.73533	5.40334	5.42916	5.62414	5.6246	5.50445	5.73394	5.55244	5.42222	5.68519	5.72257	5.66548	5.41229	5.4855	5.46375	5.61088	5.79507	5.77075	5.64245	5.7315	5.48826	5.6385	5.69122	5.86901	5.76013	5.76124	5.51265	5.75456	5.57499	5.67821	5.45277	5.37282	5.48234	5.63704	5.62194	5.36525	5.44805	5.7772	5.45736	5.58486	5.76457	5.22847
TRANSIB3	4.5009	4.33035	4.53437	4.16461	4.34897	4.12858	4.36816	4.17379	4.23728	3.98746	4.30036	4.48331	4.44597	4.27269	4.52017	4.21849	4.27127	4.12971	4.58418	4.22981	4.29723	4.37606	4.29678	4.51306	4.61217	4.64151	4.59363	4.07807	4.20699	4.4938	4.21109	4.32305	4.18063	4.67375	3.89983	3.97843	4.24411	4.46072	4.36276	4.39432	4.29651	4.13851	4.52243	4.42504	4.58681	4.29485	4.44718	4.49147	4.84494
Transib4	2.94051	2.8489	2.90775	2.91014	2.70396	2.68657	2.78864	2.99021	2.77308	2.55248	2.92474	2.87034	2.96885	2.99226	2.84304	2.94794	2.82732	2.8586	2.80991	2.78944	2.94168	2.7478	2.84616	2.85909	2.8651	2.62658	2.90473	2.80602	2.92716	2.87507	2.62892	2.99385	2.91481	2.72688	2.90498	2.92257	2.96336	2.95643	2.78222	2.76799	2.96425	3.45827	2.85368	2.74942	2.83077	2.90813	2.79409	2.97423	2.83768
Transib5	3.17616	2.81791	3.24808	2.72051	2.50565	3.58211	3.27421	2.64967	3.63444	2.66476	2.90977	2.94542	3.58916	2.98917	2.98784	3.33885	2.81292	3.37972	2.86103	2.90885	2.81137	3.3671	2.44503	2.94833	2.94954	2.77893	2.87747	2.75012	3.19774	2.96265	3.26157	3.65207	2.79443	2.64216	2.56266	2.68531	2.98594	2.56022	3.54925	3.14285	3.62221	2.59041	3.10391	2.92797	3.20013	2.97424	2.41369	3.13549	2.78625
Transib-N1_DM	0.735409	0.506062	0.661862	0.748276	0.603566	0.624115	0.943329	0.849254	0.509397	0.853865	0.679345	0.542848	0.748406	1.0949	0.876322	1.43213	0.885965	0.887507	0.850854	0.497599	0.870649	0.457491	1.05429	0.905417	0.770334	0.718679	0.725034	0.778427	0.841967	0.887454	0.730658	0.718754	0.992421	0.716039	0.473835	0.79824	0.696488	0.854172	0.894318	0.995675	0.678623	0.950693	0.874619	0.543365	0.960832	0.89371	0.502096	0.972038	0.800559
TRANSPAC_I	7.00789	9.11016	8.64476	6.66301	7.12941	6.96048	6.81392	7.46116	8.25464	7.04962	8.41888	8.82442	8.37287	6.65526	9.41097	7.96726	8.45475	8.1767	9.16247	6.65298	8.91384	8.9037	8.28725	8.92453	9.30299	8.47791	8.88217	8.00874	7.91112	7.43534	7.70029	8.31035	8.64984	8.46998	7.59554	6.88072	6.93436	5.77556	9.21679	7.77694	8.32675	7.22514	8.17205	8.74876	7.52439	8.22378	9.80902	8.42151	7.66824
TRANSPAC_LTR	3.43436	4.33137	3.85697	3.26953	2.86869	2.83218	3.868	3.85695	3.89584	3.07391	4.19857	4.46561	4.66993	3.91615	4.82307	3.77234	3.6348	3.8803	4.38014	2.93168	4.82219	4.21095	4.12889	4.7372	4.55165	4.59638	4.72981	3.71369	3.62052	3.92973	3.81836	3.82292	4.28425	4.60289	3.89591	3.4372	3.36952	2.25033	4.22409	3.3097	4.20836	3.46194	3.6595	4.36685	3.6113	4.67094	5.12304	4.5627	3.93187
XDMR	1.42727	1.34426	1.33557	1.56352	0.964345	0.904856	1.67024	1.26097	1.52504	1.14938	1.46681	1.29122	1.27884	1.29045	1.37811	1.44184	1.4892	1.3989	1.70921	1.75337	1.60861	1.37739	1.85934	1.79072	1.26842	1.56315	1.41996	1.61279	1.75749	1.68921	1.5658	1.55255	1.55803	1.66892	1.59831	1.68668	1.75087	1.67866	1.46034	1.33326	1.63764	1.87227	1.44365	1.33089	1.55068	1.57533	1.69086	1.65331	2.01916
ZAM_I	2.4488	2.79509	2.50089	2.61663	2.62603	2.80398	2.5745	2.338	2.62911	2.99116	2.51077	2.63522	2.52157	2.31197	2.6381	2.49903	2.65434	2.66115	2.81649	2.85733	2.45972	2.68337	2.63248	2.35866	2.4451	2.41259	2.47046	2.71866	2.69159	2.66033	2.73449	2.59016	2.71725	2.5307	2.94413	2.80836	2.65264	2.57664	2.54119	2.35822	2.60913	2.49986	2.67405	2.72762	2.5656	2.87871	2.5336	2.56561	2.67357
ZAM_LTR	0.103303	1.85505	-0.629143	2.09598	0.592353	0.102015	0.00654915	0.185395	0.392445	1.38584	2.21284	-0.040476	1.59262	0.272463	2.05006	0.198084	0.606135	0.370887	0.0324544	1.58218	-0.0317655	2.24372	0.758707	0.0830267	0.272582	0.731127	0.323459	0.301443	0.14273	1.59142	2.39638	-0.264407	0.527072	0.796008	1.24886	0.469501	0.89665	1.16179	0.14687	0.449175	0.281211	-0.511373	0.465925	2.48968	1.61309	0.952536	1.13555	1.01639	0.756417
[truncated: 151 more columns]

## Sheet: Table S6H
Module	Module Size	Average Connectivity	RepBase Sequence IDs
F1	4	0.0652242	ROOA_LTR, ROOA_I, DMTOM1_LTR, Copia1-LTR_DM
F2	5	0.0639456	GYPSY7_I, GYPSY7_LTR, HELENA_RT, QUASIMODO_LTR, Copia1-I_DM
F3	5	0.0357015	TAHRE, HETA, DMHMR2, TART-A, TART_B1
F4	7	0.0243456	Chouto_I, Chouto_LTR, Bica_I, Bica_LTR, TLD2, FW3_DM, GYPSY12A_LTR
F5	6	0.0210279	GYPSY8_I, DMRT1C, DIVER2_I, G3_DM, DMRT1A, BS3_DM
F6	14	0.011177	DNAREP1_DM, FB4_DM, TC1_DM, TC1-2_DM, QUASIMODO2-LTR_DM, TRANSIB2, MARINER2_DM, JOCKEY2, Transib4, G5A_DM, PLACW_DM, GYPSY12_LTR, PROTOP/PROTOP_A/PROTOP_B, S2_DM
M1	4	0.170521	MDG1_LTR, MDG1_I, DIVER_I, DIVER_LTR
M2	4	0.146402	Gypsy2-I_DM, Gypsy2-LTR_DM, GYPSY_I, GYPSY_LTR
M3	5	0.142013	Gypsy1-LTR_DM, GYPSY6_LTR, Gypsy1-I_DM, CIRCE, HMSBEAGLE_I
M4	4	0.134024	MAX_LTR, MAX_I, GYPSY5_I, GYPSY5_LTR
M5	4	0.125456	MICROPIA_I, MICROPIA_LTR, BS, INVADER5_I
M6	4	0.0957379	BLASTOPIA_I, BLASTOPIA_LTR, Jockey, ROVER_DM
M7	9	0.090376	GYPSY7_LTR, GYPSY7_I, HELENA_RT, INVADER6_I, INVADER6_LTR, Transib5, G5_DM, ROOA_LTR, Transib1
M8	5	0.082876	HETA, TART-A, TAHRE, DMHMR2, TART_B1
M9	6	0.0570496	GYPSY4_I, GYPSY4_LTR, GYPSY11_I, GYPSY11_LTR, DOC4_DM, POGO
M10	4	0.0556521	INVADER2_LTR, INVADER2_I, DMCR1A, ACCORD2_I
M11	10	0.0451339	MDG3_DM, LTRMDG3_DM, BURDOCK_LTR, GTWIN_LTR, BURDOCK_I, GTWIN_I, INVADER1_LTR, INVADER1_I, TRANSIB3, M4DM
M12	8	0.043441	INVADER4_I, INVADER4_LTR, GYPSY10_I, GYPSY10_LTR, GYPSY9_I, GYPSY9_LTR, Chimpo_LTR, HETRP_DM
M13	5	0.0407422	DMHMR1, PROTOP/PROTOP_A/PROTOP_B, DOC2_DM, ACCORD2_LTR, GYPSY12A_LTR
M14	13	0.0313155	STALKER4_LTR, BAGGINS1, STALKER4_I, DMRT1A, GYPSY12_I, BATUMI_I, FW2_DM, BS2, INVADER3_I, INVADER3_LTR, DMRT1C, Copia1-LTR_DM, XDMR
M15	10	0.0303383	QUASIMODO_LTR, QUASIMODO_I, DM1731_LTR, COPIA2I_DM, QUASIMODO2-I_DM, DM1731_I, NOMAD_LTR, IDEFIX_LTR, COPIA2LTR_DM, TABOR_LTR
M16	9	0.0294748	Bica_I, Chouto_I, Chouto_LTR, Bica_LTR, FW3_DM, BS3_DM, GYPSY2_I, Chimpo_I, Copia1-I_DM
M17	14	0.027222	ARS406_DM, SAR_DM, ZAM_I, G_DM, DOC5_DM, I_DM, G6_DM, G2_DM, SAR2_DM, STALKER3_LTR, ZAM_LTR, IVK_DM, RSP, BATUMI_LTR
M18	6	0.0256151	DOC3_DM, GYPSY3_I, GYPSY3_LTR, LOOPER1_DM, BS4_DM, FW
M19	19	0.0233722	DNAREP1_DM, TC1_DM, FB4_DM, PLACW_DM, JOCKEY2, TC1-2_DM, TRANSIB2, QUASIMODO2-LTR_DM, G5A_DM, DMTOM1_LTR, ROO_LTR, S2_DM, G4_DM, MARINER2_DM, Transib-N1_DM, ROO_I, Transib4, DMRP1, ROOA_I
M20	9	0.0213652	GYPSY6A_LTR, GYPSY12_LTR, DIVER2_I, G3_DM, GYPSY6_I, GYPSY8_I, DIVER2_LTR, FROGGER_I, GYPSY8_LTR
