# Supplementary material for: Gene expression networks in the Drosophila Genetic Reference Panel
Source: HighWire-hosted journal article supplement (doi:10.1101/gr.257592.119), 2020-03-01
Supplement: Supplemental_Table_S7.xlsx.xlsx [file Supplemental_Table_S7.xlsx.xlsx]

## Sheet: S7A. Female eQTL
TE Sequence	eQTL	Retained in model selection	P-Value	FDR	FLyBase Gene ID	Gene Symbol	Gene Name	Distance From Start (bp)	Site Class	Strand	GO Biological Process	GO Cellular Component	GO Molecular Function	Human Orthologs
ACCORD_I	2R_5862376_SNP	N	2.96e-06	0.049	Intergenic
ACCORD_I	2R_7987752_SNP	N	2.72e-06	0.049	FBgn0086677	jeb	jelly belly	0	INTRON	-	visceral muscle development ; GO:0007522 | inferred from mutant phenotype <newline> mesoderm migration involved in gastrulation ; GO:0007509 | non-traceable author statement <newline> mesoderm migration involved in gastrulation ; GO:0007509 | traceable author statement <newline> salivary gland morphogenesis ; GO:0007435 | inferred from mutant phenotype <newline> axon guidance ; GO:0007411 | infer…	extracellular region ; GO:0005576 | traceable author statement <newline> synaptic vesicle ; GO:0008021 | inferred from direct assay <newline> type Is terminal bouton ; GO:0061177 | inferred from direct assay <newline> type Ib terminal bouton ; GO:0061176 | inferred from direct assay <newline> extracellular space ; GO:0005615 | inferred from direct assay	transmembrane receptor protein tyrosine kinase activator activity ; GO:0030297 | inferred from direct assay	-
ACCORD_I	2R_8031771_SNP	N	1.96e-06	0.049	FBgn0027495	CG8378	CG8378	994	3PRIME	+	negative regulation of gene expression ; GO:0010629 | inferred from sequence or structural similarity with Smyd4	nucleus ; GO:0005634 | inferred from direct assay <newline> cytoplasm ; GO:0005737 | inferred from direct assay	histone deacetylase binding ; GO:0042826 | inferred from sequence or structural similarity with Smyd4	-
ACCORD_I	2R_8031771_SNP	N	1.96e-06	0.049	FBgn0033685	CG13178	CG13178	0	INTRON	-	cilium assembly ; GO:0042384 | inferred from sequence model	-	-	Hsap\ENSG00000116885 <newline> Hsap\C21orf2
ACCORD_I	2R_8038268_SNP	N	1.12e-07	0.049	FBgn0027504	CG8878	CG8878	0	INTRON	-	protein phosphorylation ; GO:0006468 | non-traceable author statement <newline> protein phosphorylation ; GO:0006468 | inferred from electronic annotation with InterPro:IPR000719, InterPro:IPR008271	-	protein kinase activity ; GO:0004672 | non-traceable author statement <newline> protein serine/threonine kinase activity ; GO:0004674 | inferred from sequence or structural similarity with EMBL:AF080253 <newline> ATP binding ; GO:0005524 | inferred from electronic annotation with InterPro:IPR000719, InterPro:IPR017441	-
ACCORD_I	2R_8038268_SNP	N	1.12e-07	0.049	FBgn0033686	Hen1	Hen1	0	INTRON	+	RNA methylation ; GO:0001510 | inferred from mutant phenotype inferred from direct assay <newline> posttranscriptional gene silencing by RNA ; GO:0035194 | inferred from mutant phenotype <newline> RNA methylation ; GO:0001510 | inferred from direct assay	-	O-methyltransferase activity ; GO:0008171 | inferred from direct assay <newline> RNA methyltransferase activity ; GO:0008173 | inferred from electronic annotation with InterPro:IPR026610	Hsap\ENSG00000162639
ACCORD_I	2R_8038377_SNP	N	1.54e-07	0.049	FBgn0027504	CG8878	CG8878	0	INTRON	-	protein phosphorylation ; GO:0006468 | non-traceable author statement <newline> protein phosphorylation ; GO:0006468 | inferred from electronic annotation with InterPro:IPR000719, InterPro:IPR008271	-	protein kinase activity ; GO:0004672 | non-traceable author statement <newline> protein serine/threonine kinase activity ; GO:0004674 | inferred from sequence or structural similarity with EMBL:AF080253 <newline> ATP binding ; GO:0005524 | inferred from electronic annotation with InterPro:IPR000719, InterPro:IPR017441	-
ACCORD_I	2R_8038377_SNP	N	1.54e-07	0.049	FBgn0033686	Hen1	Hen1	0	INTRON	+	RNA methylation ; GO:0001510 | inferred from mutant phenotype inferred from direct assay <newline> posttranscriptional gene silencing by RNA ; GO:0035194 | inferred from mutant phenotype <newline> RNA methylation ; GO:0001510 | inferred from direct assay	-	O-methyltransferase activity ; GO:0008171 | inferred from direct assay <newline> RNA methyltransferase activity ; GO:0008173 | inferred from electronic annotation with InterPro:IPR026610	Hsap\ENSG00000162639
ACCORD_I	2R_8041856_SNP	N	1.14e-06	0.049	FBgn0033687	CG8407	CG8407	88	3PRIME	+	microtubule-based movement ; GO:0007018 | inferred from sequence or structural similarity <newline> microtubule-based process ; GO:0007017 | inferred from electronic annotation with InterPro:IPR001372	dynein complex ; GO:0030286 | inferred from sequence or structural similarity <newline> microtubule associated complex ; GO:0005875 | inferred from electronic annotation with InterPro:IPR001372	ATPase activity, coupled ; GO:0042623 | inferred from sequence or structural similarity	-
ACCORD_I	2R_8041856_SNP	N	1.14e-06	0.049	FBgn0033688	Prp8	pre-mRNA processing factor 8	0	EXON	-	mRNA splicing, via spliceosome ; GO:0000398 | inferred from sequence or structural similarity with NCBI_NP:006436 AND inferred from sequence or structural similarity with SGD_LOCUS:PRP8; SGD:S0001208 <newline> mRNA splicing, via spliceosome ; GO:0000398 | inferred from sequence or structural similarity with SGD_LOCUS:PRP8; SGD:S0001208 <newline> mRNA splicing, via spliceosome ; GO:0000398 | infer…	U5 snRNP ; GO:0005682 | inferred from sequence or structural similarity with NCBI_NP:006436 AND inferred from sequence or structural similarity with SGD_LOCUS:PRP8; SGD:S0001208 <newline> spliceosomal complex ; GO:0005681 | inferred from sequence or structural similarity with SGD_LOCUS:PRP8; SGD:S0001208 <newline> catalytic step 2 spliceosome ; GO:0071013 | inferred from direct assay <newline> pr…	U5 snRNA binding ; GO:0030623 | inferred from electronic annotation with InterPro:IPR019581 <newline> U6 snRNA binding ; GO:0017070 | inferred from electronic annotation with InterPro:IPR019580	Hsap\PRPF8
ACCORD_I	2R_8042347_SNP	N	1.34e-06	0.049	FBgn0033687	CG8407	CG8407	579	3PRIME	+	microtubule-based movement ; GO:0007018 | inferred from sequence or structural similarity <newline> microtubule-based process ; GO:0007017 | inferred from electronic annotation with InterPro:IPR001372	dynein complex ; GO:0030286 | inferred from sequence or structural similarity <newline> microtubule associated complex ; GO:0005875 | inferred from electronic annotation with InterPro:IPR001372	ATPase activity, coupled ; GO:0042623 | inferred from sequence or structural similarity	-
ACCORD_I	2R_8042347_SNP	N	1.34e-06	0.049	FBgn0033688	Prp8	pre-mRNA processing factor 8	0	EXON	-	mRNA splicing, via spliceosome ; GO:0000398 | inferred from sequence or structural similarity with NCBI_NP:006436 AND inferred from sequence or structural similarity with SGD_LOCUS:PRP8; SGD:S0001208 <newline> mRNA splicing, via spliceosome ; GO:0000398 | inferred from sequence or structural similarity with SGD_LOCUS:PRP8; SGD:S0001208 <newline> mRNA splicing, via spliceosome ; GO:0000398 | infer…	U5 snRNP ; GO:0005682 | inferred from sequence or structural similarity with NCBI_NP:006436 AND inferred from sequence or structural similarity with SGD_LOCUS:PRP8; SGD:S0001208 <newline> spliceosomal complex ; GO:0005681 | inferred from sequence or structural similarity with SGD_LOCUS:PRP8; SGD:S0001208 <newline> catalytic step 2 spliceosome ; GO:0071013 | inferred from direct assay <newline> pr…	U5 snRNA binding ; GO:0030623 | inferred from electronic annotation with InterPro:IPR019581 <newline> U6 snRNA binding ; GO:0017070 | inferred from electronic annotation with InterPro:IPR019580	Hsap\PRPF8
ACCORD_I	2R_8043712_SNP	N	2.26e-07	0.049	FBgn0033688	Prp8	pre-mRNA processing factor 8	0	EXON	-	mRNA splicing, via spliceosome ; GO:0000398 | inferred from sequence or structural similarity with NCBI_NP:006436 AND inferred from sequence or structural similarity with SGD_LOCUS:PRP8; SGD:S0001208 <newline> mRNA splicing, via spliceosome ; GO:0000398 | inferred from sequence or structural similarity with SGD_LOCUS:PRP8; SGD:S0001208 <newline> mRNA splicing, via spliceosome ; GO:0000398 | infer…	U5 snRNP ; GO:0005682 | inferred from sequence or structural similarity with NCBI_NP:006436 AND inferred from sequence or structural similarity with SGD_LOCUS:PRP8; SGD:S0001208 <newline> spliceosomal complex ; GO:0005681 | inferred from sequence or structural similarity with SGD_LOCUS:PRP8; SGD:S0001208 <newline> catalytic step 2 spliceosome ; GO:0071013 | inferred from direct assay <newline> pr…	U5 snRNA binding ; GO:0030623 | inferred from electronic annotation with InterPro:IPR019581 <newline> U6 snRNA binding ; GO:0017070 | inferred from electronic annotation with InterPro:IPR019580	Hsap\PRPF8
ACCORD_I	2R_8046668_SNP	N	4.97e-07	0.049	FBgn0033688	Prp8	pre-mRNA processing factor 8	0	EXON	-	mRNA splicing, via spliceosome ; GO:0000398 | inferred from sequence or structural similarity with NCBI_NP:006436 AND inferred from sequence or structural similarity with SGD_LOCUS:PRP8; SGD:S0001208 <newline> mRNA splicing, via spliceosome ; GO:0000398 | inferred from sequence or structural similarity with SGD_LOCUS:PRP8; SGD:S0001208 <newline> mRNA splicing, via spliceosome ; GO:0000398 | infer…	U5 snRNP ; GO:0005682 | inferred from sequence or structural similarity with NCBI_NP:006436 AND inferred from sequence or structural similarity with SGD_LOCUS:PRP8; SGD:S0001208 <newline> spliceosomal complex ; GO:0005681 | inferred from sequence or structural similarity with SGD_LOCUS:PRP8; SGD:S0001208 <newline> catalytic step 2 spliceosome ; GO:0071013 | inferred from direct assay <newline> pr…	U5 snRNA binding ; GO:0030623 | inferred from electronic annotation with InterPro:IPR019581 <newline> U6 snRNA binding ; GO:0017070 | inferred from electronic annotation with InterPro:IPR019580	Hsap\PRPF8
ACCORD_I	2R_8049979_SNP	N	1.63e-06	0.049	FBgn0033688	Prp8	pre-mRNA processing factor 8	0	EXON	-	mRNA splicing, via spliceosome ; GO:0000398 | inferred from sequence or structural similarity with NCBI_NP:006436 AND inferred from sequence or structural similarity with SGD_LOCUS:PRP8; SGD:S0001208 <newline> mRNA splicing, via spliceosome ; GO:0000398 | inferred from sequence or structural similarity with SGD_LOCUS:PRP8; SGD:S0001208 <newline> mRNA splicing, via spliceosome ; GO:0000398 | infer…	U5 snRNP ; GO:0005682 | inferred from sequence or structural similarity with NCBI_NP:006436 AND inferred from sequence or structural similarity with SGD_LOCUS:PRP8; SGD:S0001208 <newline> spliceosomal complex ; GO:0005681 | inferred from sequence or structural similarity with SGD_LOCUS:PRP8; SGD:S0001208 <newline> catalytic step 2 spliceosome ; GO:0071013 | inferred from direct assay <newline> pr…	U5 snRNA binding ; GO:0030623 | inferred from electronic annotation with InterPro:IPR019581 <newline> U6 snRNA binding ; GO:0017070 | inferred from electronic annotation with InterPro:IPR019580	Hsap\PRPF8
ACCORD_I	2R_8050589_SNP	N	1.62e-06	0.049	FBgn0033688	Prp8	pre-mRNA processing factor 8	86	5PRIME	-	mRNA splicing, via spliceosome ; GO:0000398 | inferred from sequence or structural similarity with NCBI_NP:006436 AND inferred from sequence or structural similarity with SGD_LOCUS:PRP8; SGD:S0001208 <newline> mRNA splicing, via spliceosome ; GO:0000398 | inferred from sequence or structural similarity with SGD_LOCUS:PRP8; SGD:S0001208 <newline> mRNA splicing, via spliceosome ; GO:0000398 | infer…	U5 snRNP ; GO:0005682 | inferred from sequence or structural similarity with NCBI_NP:006436 AND inferred from sequence or structural similarity with SGD_LOCUS:PRP8; SGD:S0001208 <newline> spliceosomal complex ; GO:0005681 | inferred from sequence or structural similarity with SGD_LOCUS:PRP8; SGD:S0001208 <newline> catalytic step 2 spliceosome ; GO:0071013 | inferred from direct assay <newline> pr…	U5 snRNA binding ; GO:0030623 | inferred from electronic annotation with InterPro:IPR019581 <newline> U6 snRNA binding ; GO:0017070 | inferred from electronic annotation with InterPro:IPR019580	Hsap\PRPF8
ACCORD_I	2R_8050589_SNP	N	1.62e-06	0.049	FBgn0040759	CG13177	CG13177	591	5PRIME	+	-	-	-	-
ACCORD_I	2R_8051603_SNP	N	1.39e-06	0.049	FBgn0040759	CG13177	CG13177	0	EXON	+	-	-	-	-
ACCORD_I	2R_8051603_SNP	N	1.39e-06	0.049	FBgn0085261	CG34232	CG34232	811	3PRIME	-	-	-	-	-
ACCORD_I	2R_8052802_SNP	N	1.81e-06	0.049	FBgn0014184	Oda	Ornithine decarboxylase antizyme	998	3PRIME	-	cell differentiation ; GO:0030154 | non-traceable author statement	-	ornithine decarboxylase inhibitor activity ; GO:0008073 | inferred from sequence or structural similarity with HGNC_gene:OAZ1; HGNC:8095; OMIM:601579 <newline> ornithine decarboxylase inhibitor activity ; GO:0008073 | non-traceable author statement	Hsap\OAZ3 <newline> Hsap\OAZ1 <newline> Hsap\OAZ2
ACCORD_I	2R_8052802_SNP	N	1.81e-06	0.049	FBgn0040759	CG13177	CG13177	401	3PRIME	+	-	-	-	-
ACCORD_I	2R_8052802_SNP	N	1.81e-06	0.049	FBgn0085261	CG34232	CG34232	0	EXON	-	-	-	-	-
ACCORD_I	2R_8053209_SNP	N	2.32e-06	0.049	FBgn0014184	Oda	Ornithine decarboxylase antizyme	591	3PRIME	-	cell differentiation ; GO:0030154 | non-traceable author statement	-	ornithine decarboxylase inhibitor activity ; GO:0008073 | inferred from sequence or structural similarity with HGNC_gene:OAZ1; HGNC:8095; OMIM:601579 <newline> ornithine decarboxylase inhibitor activity ; GO:0008073 | non-traceable author statement	Hsap\OAZ3 <newline> Hsap\OAZ1 <newline> Hsap\OAZ2
ACCORD_I	2R_8053209_SNP	N	2.32e-06	0.049	FBgn0040759	CG13177	CG13177	808	3PRIME	+	-	-	-	-
ACCORD_I	2R_8053209_SNP	N	2.32e-06	0.049	FBgn0085261	CG34232	CG34232	0	EXON	-	-	-	-	-
ACCORD_I	2R_8053919_SNP	N	9.38e-07	0.049	FBgn0014184	Oda	Ornithine decarboxylase antizyme	0	EXON	-	cell differentiation ; GO:0030154 | non-traceable author statement	-	ornithine decarboxylase inhibitor activity ; GO:0008073 | inferred from sequence or structural similarity with HGNC_gene:OAZ1; HGNC:8095; OMIM:601579 <newline> ornithine decarboxylase inhibitor activity ; GO:0008073 | non-traceable author statement	Hsap\OAZ3 <newline> Hsap\OAZ1 <newline> Hsap\OAZ2
ACCORD_I	2R_8053919_SNP	N	9.38e-07	0.049	FBgn0085261	CG34232	CG34232	602	5PRIME	-	-	-	-	-
ACCORD_I	2R_8059576_SNP	N	2.02e-07	0.049	FBgn0014184	Oda	Ornithine decarboxylase antizyme	0	INTRON	-	cell differentiation ; GO:0030154 | non-traceable author statement	-	ornithine decarboxylase inhibitor activity ; GO:0008073 | inferred from sequence or structural similarity with HGNC_gene:OAZ1; HGNC:8095; OMIM:601579 <newline> ornithine decarboxylase inhibitor activity ; GO:0008073 | non-traceable author statement	Hsap\OAZ3 <newline> Hsap\OAZ1 <newline> Hsap\OAZ2
ACCORD_I	2R_8059614_SNP	N	4.26e-09	0.049	FBgn0014184	Oda	Ornithine decarboxylase antizyme	0	INTRON	-	cell differentiation ; GO:0030154 | non-traceable author statement	-	ornithine decarboxylase inhibitor activity ; GO:0008073 | inferred from sequence or structural similarity with HGNC_gene:OAZ1; HGNC:8095; OMIM:601579 <newline> ornithine decarboxylase inhibitor activity ; GO:0008073 | non-traceable author statement	Hsap\OAZ3 <newline> Hsap\OAZ1 <newline> Hsap\OAZ2
ACCORD_I	2R_8059616_SNP	N	2.53e-09	0.049	FBgn0014184	Oda	Ornithine decarboxylase antizyme	0	INTRON	-	cell differentiation ; GO:0030154 | non-traceable author statement	-	ornithine decarboxylase inhibitor activity ; GO:0008073 | inferred from sequence or structural similarity with HGNC_gene:OAZ1; HGNC:8095; OMIM:601579 <newline> ornithine decarboxylase inhibitor activity ; GO:0008073 | non-traceable author statement	Hsap\OAZ3 <newline> Hsap\OAZ1 <newline> Hsap\OAZ2
ACCORD_I	2R_8059618_SNP	N	4.14e-09	0.049	FBgn0014184	Oda	Ornithine decarboxylase antizyme	0	INTRON	-	cell differentiation ; GO:0030154 | non-traceable author statement	-	ornithine decarboxylase inhibitor activity ; GO:0008073 | inferred from sequence or structural similarity with HGNC_gene:OAZ1; HGNC:8095; OMIM:601579 <newline> ornithine decarboxylase inhibitor activity ; GO:0008073 | non-traceable author statement	Hsap\OAZ3 <newline> Hsap\OAZ1 <newline> Hsap\OAZ2
ACCORD_I	2R_8059620_DEL	N	6.5e-09	0.049	FBgn0014184	Oda	Ornithine decarboxylase antizyme	0	INTRON	-	cell differentiation ; GO:0030154 | non-traceable author statement	-	ornithine decarboxylase inhibitor activity ; GO:0008073 | inferred from sequence or structural similarity with HGNC_gene:OAZ1; HGNC:8095; OMIM:601579 <newline> ornithine decarboxylase inhibitor activity ; GO:0008073 | non-traceable author statement	Hsap\OAZ3 <newline> Hsap\OAZ1 <newline> Hsap\OAZ2
ACCORD_I	2R_8059905_SNP	N	1.81e-09	0.049	FBgn0014184	Oda	Ornithine decarboxylase antizyme	0	INTRON	-	cell differentiation ; GO:0030154 | non-traceable author statement	-	ornithine decarboxylase inhibitor activity ; GO:0008073 | inferred from sequence or structural similarity with HGNC_gene:OAZ1; HGNC:8095; OMIM:601579 <newline> ornithine decarboxylase inhibitor activity ; GO:0008073 | non-traceable author statement	Hsap\OAZ3 <newline> Hsap\OAZ1 <newline> Hsap\OAZ2
ACCORD_I	2R_8059934_SNP	N	5.36e-10	0.049	FBgn0014184	Oda	Ornithine decarboxylase antizyme	0	INTRON	-	cell differentiation ; GO:0030154 | non-traceable author statement	-	ornithine decarboxylase inhibitor activity ; GO:0008073 | inferred from sequence or structural similarity with HGNC_gene:OAZ1; HGNC:8095; OMIM:601579 <newline> ornithine decarboxylase inhibitor activity ; GO:0008073 | non-traceable author statement	Hsap\OAZ3 <newline> Hsap\OAZ1 <newline> Hsap\OAZ2
ACCORD_I	2R_8060092_SNP	N	4.48e-10	0.049	FBgn0014184	Oda	Ornithine decarboxylase antizyme	0	INTRON	-	cell differentiation ; GO:0030154 | non-traceable author statement	-	ornithine decarboxylase inhibitor activity ; GO:0008073 | inferred from sequence or structural similarity with HGNC_gene:OAZ1; HGNC:8095; OMIM:601579 <newline> ornithine decarboxylase inhibitor activity ; GO:0008073 | non-traceable author statement	Hsap\OAZ3 <newline> Hsap\OAZ1 <newline> Hsap\OAZ2
ACCORD_I	2R_8060123_SNP	N	6.99e-10	0.049	FBgn0014184	Oda	Ornithine decarboxylase antizyme	0	INTRON	-	cell differentiation ; GO:0030154 | non-traceable author statement	-	ornithine decarboxylase inhibitor activity ; GO:0008073 | inferred from sequence or structural similarity with HGNC_gene:OAZ1; HGNC:8095; OMIM:601579 <newline> ornithine decarboxylase inhibitor activity ; GO:0008073 | non-traceable author statement	Hsap\OAZ3 <newline> Hsap\OAZ1 <newline> Hsap\OAZ2
ACCORD_I	2R_8060142_SNP	N	5.94e-10	0.049	FBgn0014184	Oda	Ornithine decarboxylase antizyme	0	INTRON	-	cell differentiation ; GO:0030154 | non-traceable author statement	-	ornithine decarboxylase inhibitor activity ; GO:0008073 | inferred from sequence or structural similarity with HGNC_gene:OAZ1; HGNC:8095; OMIM:601579 <newline> ornithine decarboxylase inhibitor activity ; GO:0008073 | non-traceable author statement	Hsap\OAZ3 <newline> Hsap\OAZ1 <newline> Hsap\OAZ2
ACCORD_I	2R_8060810_SNP	N	5.84e-09	0.049	FBgn0014184	Oda	Ornithine decarboxylase antizyme	0	INTRON	-	cell differentiation ; GO:0030154 | non-traceable author statement	-	ornithine decarboxylase inhibitor activity ; GO:0008073 | inferred from sequence or structural similarity with HGNC_gene:OAZ1; HGNC:8095; OMIM:601579 <newline> ornithine decarboxylase inhibitor activity ; GO:0008073 | non-traceable author statement	Hsap\OAZ3 <newline> Hsap\OAZ1 <newline> Hsap\OAZ2
ACCORD_I	2R_8060899_SNP	N	4.78e-10	0.049	FBgn0014184	Oda	Ornithine decarboxylase antizyme	0	INTRON	-	cell differentiation ; GO:0030154 | non-traceable author statement	-	ornithine decarboxylase inhibitor activity ; GO:0008073 | inferred from sequence or structural similarity with HGNC_gene:OAZ1; HGNC:8095; OMIM:601579 <newline> ornithine decarboxylase inhibitor activity ; GO:0008073 | non-traceable author statement	Hsap\OAZ3 <newline> Hsap\OAZ1 <newline> Hsap\OAZ2
ACCORD_I	2R_8060916_SNP	N	4.94e-09	0.049	FBgn0014184	Oda	Ornithine decarboxylase antizyme	0	INTRON	-	cell differentiation ; GO:0030154 | non-traceable author statement	-	ornithine decarboxylase inhibitor activity ; GO:0008073 | inferred from sequence or structural similarity with HGNC_gene:OAZ1; HGNC:8095; OMIM:601579 <newline> ornithine decarboxylase inhibitor activity ; GO:0008073 | non-traceable author statement	Hsap\OAZ3 <newline> Hsap\OAZ1 <newline> Hsap\OAZ2
ACCORD_I	2R_8060917_SNP	N	4.78e-10	0.049	FBgn0014184	Oda	Ornithine decarboxylase antizyme	0	INTRON	-	cell differentiation ; GO:0030154 | non-traceable author statement	-	ornithine decarboxylase inhibitor activity ; GO:0008073 | inferred from sequence or structural similarity with HGNC_gene:OAZ1; HGNC:8095; OMIM:601579 <newline> ornithine decarboxylase inhibitor activity ; GO:0008073 | non-traceable author statement	Hsap\OAZ3 <newline> Hsap\OAZ1 <newline> Hsap\OAZ2
ACCORD_I	2R_8060958_SNP	N	1.1e-07	0.049	FBgn0014184	Oda	Ornithine decarboxylase antizyme	0	INTRON	-	cell differentiation ; GO:0030154 | non-traceable author statement	-	ornithine decarboxylase inhibitor activity ; GO:0008073 | inferred from sequence or structural similarity with HGNC_gene:OAZ1; HGNC:8095; OMIM:601579 <newline> ornithine decarboxylase inhibitor activity ; GO:0008073 | non-traceable author statement	Hsap\OAZ3 <newline> Hsap\OAZ1 <newline> Hsap\OAZ2
ACCORD_I	2R_8060973_SNP	N	5.27e-09	0.049	FBgn0014184	Oda	Ornithine decarboxylase antizyme	0	INTRON	-	cell differentiation ; GO:0030154 | non-traceable author statement	-	ornithine decarboxylase inhibitor activity ; GO:0008073 | inferred from sequence or structural similarity with HGNC_gene:OAZ1; HGNC:8095; OMIM:601579 <newline> ornithine decarboxylase inhibitor activity ; GO:0008073 | non-traceable author statement	Hsap\OAZ3 <newline> Hsap\OAZ1 <newline> Hsap\OAZ2
ACCORD_I	2R_8061039_SNP	N	4.1e-09	0.049	FBgn0014184	Oda	Ornithine decarboxylase antizyme	0	INTRON	-	cell differentiation ; GO:0030154 | non-traceable author statement	-	ornithine decarboxylase inhibitor activity ; GO:0008073 | inferred from sequence or structural similarity with HGNC_gene:OAZ1; HGNC:8095; OMIM:601579 <newline> ornithine decarboxylase inhibitor activity ; GO:0008073 | non-traceable author statement	Hsap\OAZ3 <newline> Hsap\OAZ1 <newline> Hsap\OAZ2
ACCORD_I	2R_8061873_SNP	N	8.44e-10	0.049	FBgn0010621	Cct5	T-complex Chaperonin 5	434	5PRIME	+	protein folding ; GO:0006457 | inferred from sequence or structural similarity <newline> protein folding ; GO:0006457 | inferred from sequence or structural similarity with UniProtKB:P48643 <newline> mitotic spindle organization ; GO:0007052 | inferred from mutant phenotype <newline> neurogenesis ; GO:0022008 | inferred from mutant phenotype	chaperonin-containing T-complex ; GO:0005832 | inferred from sequence or structural similarity <newline> chaperonin-containing T-complex ; GO:0005832 | inferred from sequence or structural similarity with UniProtKB:P48643 <newline> microtubule associated complex ; GO:0005875 | inferred from direct assay	ATPase activity, coupled ; GO:0042623 | inferred from sequence or structural similarity <newline> ATPase activity, coupled ; GO:0042623 | inferred from sequence or structural similarity with UniProtKB:P48643 <newline> unfolded protein binding ; GO:0051082 | inferred from sequence or structural similarity with UniProtKB:P48643 <newline> ATP binding ; GO:0005524 | inferred from electronic annotatio…	Hsap\CCT4 <newline> Hsap\CCT5
ACCORD_I	2R_8061873_SNP	N	8.44e-10	0.049	FBgn0014184	Oda	Ornithine decarboxylase antizyme	104	5PRIME	-	cell differentiation ; GO:0030154 | non-traceable author statement	-	ornithine decarboxylase inhibitor activity ; GO:0008073 | inferred from sequence or structural similarity with HGNC_gene:OAZ1; HGNC:8095; OMIM:601579 <newline> ornithine decarboxylase inhibitor activity ; GO:0008073 | non-traceable author statement	Hsap\OAZ3 <newline> Hsap\OAZ1 <newline> Hsap\OAZ2
ACCORD_I	2R_8061931_SNP	N	3.79e-09	0.049	FBgn0010621	Cct5	T-complex Chaperonin 5	376	5PRIME	+	protein folding ; GO:0006457 | inferred from sequence or structural similarity <newline> protein folding ; GO:0006457 | inferred from sequence or structural similarity with UniProtKB:P48643 <newline> mitotic spindle organization ; GO:0007052 | inferred from mutant phenotype <newline> neurogenesis ; GO:0022008 | inferred from mutant phenotype	chaperonin-containing T-complex ; GO:0005832 | inferred from sequence or structural similarity <newline> chaperonin-containing T-complex ; GO:0005832 | inferred from sequence or structural similarity with UniProtKB:P48643 <newline> microtubule associated complex ; GO:0005875 | inferred from direct assay	ATPase activity, coupled ; GO:0042623 | inferred from sequence or structural similarity <newline> ATPase activity, coupled ; GO:0042623 | inferred from sequence or structural similarity with UniProtKB:P48643 <newline> unfolded protein binding ; GO:0051082 | inferred from sequence or structural similarity with UniProtKB:P48643 <newline> ATP binding ; GO:0005524 | inferred from electronic annotatio…	Hsap\CCT4 <newline> Hsap\CCT5
ACCORD_I	2R_8061931_SNP	N	3.79e-09	0.049	FBgn0014184	Oda	Ornithine decarboxylase antizyme	162	5PRIME	-	cell differentiation ; GO:0030154 | non-traceable author statement	-	ornithine decarboxylase inhibitor activity ; GO:0008073 | inferred from sequence or structural similarity with HGNC_gene:OAZ1; HGNC:8095; OMIM:601579 <newline> ornithine decarboxylase inhibitor activity ; GO:0008073 | non-traceable author statement	Hsap\OAZ3 <newline> Hsap\OAZ1 <newline> Hsap\OAZ2
ACCORD_I	2R_8062000_SNP	N	4.56e-10	0.049	FBgn0010621	Cct5	T-complex Chaperonin 5	307	5PRIME	+	protein folding ; GO:0006457 | inferred from sequence or structural similarity <newline> protein folding ; GO:0006457 | inferred from sequence or structural similarity with UniProtKB:P48643 <newline> mitotic spindle organization ; GO:0007052 | inferred from mutant phenotype <newline> neurogenesis ; GO:0022008 | inferred from mutant phenotype	chaperonin-containing T-complex ; GO:0005832 | inferred from sequence or structural similarity <newline> chaperonin-containing T-complex ; GO:0005832 | inferred from sequence or structural similarity with UniProtKB:P48643 <newline> microtubule associated complex ; GO:0005875 | inferred from direct assay	ATPase activity, coupled ; GO:0042623 | inferred from sequence or structural similarity <newline> ATPase activity, coupled ; GO:0042623 | inferred from sequence or structural similarity with UniProtKB:P48643 <newline> unfolded protein binding ; GO:0051082 | inferred from sequence or structural similarity with UniProtKB:P48643 <newline> ATP binding ; GO:0005524 | inferred from electronic annotatio…	Hsap\CCT4 <newline> Hsap\CCT5
ACCORD_I	2R_8062000_SNP	N	4.56e-10	0.049	FBgn0014184	Oda	Ornithine decarboxylase antizyme	231	5PRIME	-	cell differentiation ; GO:0030154 | non-traceable author statement	-	ornithine decarboxylase inhibitor activity ; GO:0008073 | inferred from sequence or structural similarity with HGNC_gene:OAZ1; HGNC:8095; OMIM:601579 <newline> ornithine decarboxylase inhibitor activity ; GO:0008073 | non-traceable author statement	Hsap\OAZ3 <newline> Hsap\OAZ1 <newline> Hsap\OAZ2
ACCORD_I	2R_8062180_SNP	N	1.08e-09	0.049	FBgn0010621	Cct5	T-complex Chaperonin 5	127	5PRIME	+	protein folding ; GO:0006457 | inferred from sequence or structural similarity <newline> protein folding ; GO:0006457 | inferred from sequence or structural similarity with UniProtKB:P48643 <newline> mitotic spindle organization ; GO:0007052 | inferred from mutant phenotype <newline> neurogenesis ; GO:0022008 | inferred from mutant phenotype	chaperonin-containing T-complex ; GO:0005832 | inferred from sequence or structural similarity <newline> chaperonin-containing T-complex ; GO:0005832 | inferred from sequence or structural similarity with UniProtKB:P48643 <newline> microtubule associated complex ; GO:0005875 | inferred from direct assay	ATPase activity, coupled ; GO:0042623 | inferred from sequence or structural similarity <newline> ATPase activity, coupled ; GO:0042623 | inferred from sequence or structural similarity with UniProtKB:P48643 <newline> unfolded protein binding ; GO:0051082 | inferred from sequence or structural similarity with UniProtKB:P48643 <newline> ATP binding ; GO:0005524 | inferred from electronic annotatio…	Hsap\CCT4 <newline> Hsap\CCT5
ACCORD_I	2R_8062180_SNP	N	1.08e-09	0.049	FBgn0014184	Oda	Ornithine decarboxylase antizyme	411	5PRIME	-	cell differentiation ; GO:0030154 | non-traceable author statement	-	ornithine decarboxylase inhibitor activity ; GO:0008073 | inferred from sequence or structural similarity with HGNC_gene:OAZ1; HGNC:8095; OMIM:601579 <newline> ornithine decarboxylase inhibitor activity ; GO:0008073 | non-traceable author statement	Hsap\OAZ3 <newline> Hsap\OAZ1 <newline> Hsap\OAZ2
ACCORD_I	2R_8062781_SNP	N	9.59e-08	0.049	FBgn0010621	Cct5	T-complex Chaperonin 5	0	INTRON	+	protein folding ; GO:0006457 | inferred from sequence or structural similarity <newline> protein folding ; GO:0006457 | inferred from sequence or structural similarity with UniProtKB:P48643 <newline> mitotic spindle organization ; GO:0007052 | inferred from mutant phenotype <newline> neurogenesis ; GO:0022008 | inferred from mutant phenotype	chaperonin-containing T-complex ; GO:0005832 | inferred from sequence or structural similarity <newline> chaperonin-containing T-complex ; GO:0005832 | inferred from sequence or structural similarity with UniProtKB:P48643 <newline> microtubule associated complex ; GO:0005875 | inferred from direct assay	ATPase activity, coupled ; GO:0042623 | inferred from sequence or structural similarity <newline> ATPase activity, coupled ; GO:0042623 | inferred from sequence or structural similarity with UniProtKB:P48643 <newline> unfolded protein binding ; GO:0051082 | inferred from sequence or structural similarity with UniProtKB:P48643 <newline> ATP binding ; GO:0005524 | inferred from electronic annotatio…	Hsap\CCT4 <newline> Hsap\CCT5
ACCORD_I	2R_8062950_SNP	N	2.47e-08	0.049	FBgn0010621	Cct5	T-complex Chaperonin 5	0	INTRON	+	protein folding ; GO:0006457 | inferred from sequence or structural similarity <newline> protein folding ; GO:0006457 | inferred from sequence or structural similarity with UniProtKB:P48643 <newline> mitotic spindle organization ; GO:0007052 | inferred from mutant phenotype <newline> neurogenesis ; GO:0022008 | inferred from mutant phenotype	chaperonin-containing T-complex ; GO:0005832 | inferred from sequence or structural similarity <newline> chaperonin-containing T-complex ; GO:0005832 | inferred from sequence or structural similarity with UniProtKB:P48643 <newline> microtubule associated complex ; GO:0005875 | inferred from direct assay	ATPase activity, coupled ; GO:0042623 | inferred from sequence or structural similarity <newline> ATPase activity, coupled ; GO:0042623 | inferred from sequence or structural similarity with UniProtKB:P48643 <newline> unfolded protein binding ; GO:0051082 | inferred from sequence or structural similarity with UniProtKB:P48643 <newline> ATP binding ; GO:0005524 | inferred from electronic annotatio…	Hsap\CCT4 <newline> Hsap\CCT5
ACCORD_I	2R_8063030_SNP	N	8.48e-09	0.049	FBgn0010621	Cct5	T-complex Chaperonin 5	0	INTRON	+	protein folding ; GO:0006457 | inferred from sequence or structural similarity <newline> protein folding ; GO:0006457 | inferred from sequence or structural similarity with UniProtKB:P48643 <newline> mitotic spindle organization ; GO:0007052 | inferred from mutant phenotype <newline> neurogenesis ; GO:0022008 | inferred from mutant phenotype	chaperonin-containing T-complex ; GO:0005832 | inferred from sequence or structural similarity <newline> chaperonin-containing T-complex ; GO:0005832 | inferred from sequence or structural similarity with UniProtKB:P48643 <newline> microtubule associated complex ; GO:0005875 | inferred from direct assay	ATPase activity, coupled ; GO:0042623 | inferred from sequence or structural similarity <newline> ATPase activity, coupled ; GO:0042623 | inferred from sequence or structural similarity with UniProtKB:P48643 <newline> unfolded protein binding ; GO:0051082 | inferred from sequence or structural similarity with UniProtKB:P48643 <newline> ATP binding ; GO:0005524 | inferred from electronic annotatio…	Hsap\CCT4 <newline> Hsap\CCT5
ACCORD_I	2R_8063706_SNP	N	4.61e-09	0.049	FBgn0010621	Cct5	T-complex Chaperonin 5	0	EXON	+	protein folding ; GO:0006457 | inferred from sequence or structural similarity <newline> protein folding ; GO:0006457 | inferred from sequence or structural similarity with UniProtKB:P48643 <newline> mitotic spindle organization ; GO:0007052 | inferred from mutant phenotype <newline> neurogenesis ; GO:0022008 | inferred from mutant phenotype	chaperonin-containing T-complex ; GO:0005832 | inferred from sequence or structural similarity <newline> chaperonin-containing T-complex ; GO:0005832 | inferred from sequence or structural similarity with UniProtKB:P48643 <newline> microtubule associated complex ; GO:0005875 | inferred from direct assay	ATPase activity, coupled ; GO:0042623 | inferred from sequence or structural similarity <newline> ATPase activity, coupled ; GO:0042623 | inferred from sequence or structural similarity with UniProtKB:P48643 <newline> unfolded protein binding ; GO:0051082 | inferred from sequence or structural similarity with UniProtKB:P48643 <newline> ATP binding ; GO:0005524 | inferred from electronic annotatio…	Hsap\CCT4 <newline> Hsap\CCT5
ACCORD_I	2R_8063730_SNP	N	5.29e-09	0.049	FBgn0010621	Cct5	T-complex Chaperonin 5	0	EXON	+	protein folding ; GO:0006457 | inferred from sequence or structural similarity <newline> protein folding ; GO:0006457 | inferred from sequence or structural similarity with UniProtKB:P48643 <newline> mitotic spindle organization ; GO:0007052 | inferred from mutant phenotype <newline> neurogenesis ; GO:0022008 | inferred from mutant phenotype	chaperonin-containing T-complex ; GO:0005832 | inferred from sequence or structural similarity <newline> chaperonin-containing T-complex ; GO:0005832 | inferred from sequence or structural similarity with UniProtKB:P48643 <newline> microtubule associated complex ; GO:0005875 | inferred from direct assay	ATPase activity, coupled ; GO:0042623 | inferred from sequence or structural similarity <newline> ATPase activity, coupled ; GO:0042623 | inferred from sequence or structural similarity with UniProtKB:P48643 <newline> unfolded protein binding ; GO:0051082 | inferred from sequence or structural similarity with UniProtKB:P48643 <newline> ATP binding ; GO:0005524 | inferred from electronic annotatio…	Hsap\CCT4 <newline> Hsap\CCT5
ACCORD_I	2R_8066715_SNP	N	2.24e-08	0.049	FBgn0033690	EndoG	Endonuclease G	657	5PRIME	-	DNA-dependent DNA replication ; GO:0006261 | inferred from sequence or structural similarity with UniProtKB:Q14249 <newline> spermatid development ; GO:0007286 | inferred from mutant phenotype <newline> mitochondrion inheritance ; GO:0000001 | inferred from mutant phenotype <newline> ectopic germ cell programmed cell death ; GO:0035234 | inferred from mutant phenotype	mitochondrial inner membrane ; GO:0005743 | inferred from sequence or structural similarity with SGD_LOCUS:NUC1; SGD:S0003744 <newline> mitochondrion ; GO:0005739 | inferred from sequence or structural similarity with UniProtKB:Q14249	endodeoxyribonuclease activity ; GO:0004520 | inferred from sequence or structural similarity with UniProtKB:P38447 <newline> endodeoxyribonuclease activity ; GO:0004520 | inferred from sequence or structural similarity with UniProtKB:Q14249 <newline> endoribonuclease activity ; GO:0004521 | inferred from direct assay <newline> endodeoxyribonuclease activity ; GO:0004520 | inferred from direct as…	Hsap\ENDOG
ACCORD_I	2R_8066715_SNP	N	2.24e-08	0.049	FBgn0033691	CG8860	CG8860	273	3PRIME	-	SRP-dependent cotranslational protein targeting to membrane, translocation ; GO:0006616 | inferred from sequence or structural similarity with UniProtKB:P38384 <newline> protein transport ; GO:0015031 | inferred from sequence or structural similarity with UniProtKB:P60058 <newline> neurogenesis ; GO:0022008 | inferred from mutant phenotype	Sec61 translocon complex ; GO:0005784 | inferred from sequence or structural similarity with UniProtKB:P38384 <newline> integral component of endoplasmic reticulum membrane ; GO:0030176 | inferred from sequence or structural similarity with UniProtKB:P60058	protein transporter activity ; GO:0008565 | inferred from sequence or structural similarity with UniProtKB:P38384 <newline> protein transporter activity ; GO:0008565 | inferred from sequence or structural similarity with UniProtKB:P60058 <newline> P-P-bond-hydrolysis-driven protein transmembrane transporter activity ; GO:0015450 | inferred from electronic annotation with InterPro:IPR008158	Hsap\SEC61G
ACCORD_I	2R_8066715_SNP	N	2.24e-08	0.049	FBgn0266802	CR45264	CR45264	0	EXON	+	-	-	-	-
ACCORD_I	2R_8067090_SNP	N	1.13e-08	0.049	FBgn0033691	CG8860	CG8860	0	EXON	-	SRP-dependent cotranslational protein targeting to membrane, translocation ; GO:0006616 | inferred from sequence or structural similarity with UniProtKB:P38384 <newline> protein transport ; GO:0015031 | inferred from sequence or structural similarity with UniProtKB:P60058 <newline> neurogenesis ; GO:0022008 | inferred from mutant phenotype	Sec61 translocon complex ; GO:0005784 | inferred from sequence or structural similarity with UniProtKB:P38384 <newline> integral component of endoplasmic reticulum membrane ; GO:0030176 | inferred from sequence or structural similarity with UniProtKB:P60058	protein transporter activity ; GO:0008565 | inferred from sequence or structural similarity with UniProtKB:P38384 <newline> protein transporter activity ; GO:0008565 | inferred from sequence or structural similarity with UniProtKB:P60058 <newline> P-P-bond-hydrolysis-driven protein transmembrane transporter activity ; GO:0015450 | inferred from electronic annotation with InterPro:IPR008158	Hsap\SEC61G
ACCORD_I	2R_8067090_SNP	N	1.13e-08	0.049	FBgn0033692	wash	washout	908	5PRIME	+	spiracle morphogenesis, open tracheal system ; GO:0035277 | inferred from mutant phenotype <newline> prepupal development ; GO:0035210 | inferred from mutant phenotype <newline> Arp2/3 complex-mediated actin nucleation ; GO:0034314 | inferred from direct assay <newline> oogenesis ; GO:0048477 | inferred from mutant phenotype <newline> microtubule bundle formation ; GO:0001578 | inferred from dire…	transcription factor complex ; GO:0005667 | inferred from physical interaction with Trf2 <newline> endosome ; GO:0005768 | inferred from direct assay <newline> perinuclear region of cytoplasm ; GO:0048471 | inferred from direct assay <newline> cytoplasm ; GO:0005737 | inferred from direct assay <newline> nucleus ; GO:0005634 | inferred from direct assay <newline> filamentous actin ; GO:0031941 | …	GTPase binding ; GO:0051020 | inferred from physical interaction with Rho1 <newline> protein binding ; GO:0005515 | inferred from physical interaction with spir <newline> alpha-tubulin binding ; GO:0043014 | inferred from electronic annotation with InterPro:IPR028290	-
ACCORD_I	2R_8067090_SNP	N	1.13e-08	0.049	FBgn0266802	CR45264	CR45264	0	EXON	+	-	-	-	-
ACCORD_I	2R_8067842_SNP	N	1.85e-08	0.049	FBgn0033691	CG8860	CG8860	435	5PRIME	-	SRP-dependent cotranslational protein targeting to membrane, translocation ; GO:0006616 | inferred from sequence or structural similarity with UniProtKB:P38384 <newline> protein transport ; GO:0015031 | inferred from sequence or structural similarity with UniProtKB:P60058 <newline> neurogenesis ; GO:0022008 | inferred from mutant phenotype	Sec61 translocon complex ; GO:0005784 | inferred from sequence or structural similarity with UniProtKB:P38384 <newline> integral component of endoplasmic reticulum membrane ; GO:0030176 | inferred from sequence or structural similarity with UniProtKB:P60058	protein transporter activity ; GO:0008565 | inferred from sequence or structural similarity with UniProtKB:P38384 <newline> protein transporter activity ; GO:0008565 | inferred from sequence or structural similarity with UniProtKB:P60058 <newline> P-P-bond-hydrolysis-driven protein transmembrane transporter activity ; GO:0015450 | inferred from electronic annotation with InterPro:IPR008158	Hsap\SEC61G
ACCORD_I	2R_8067842_SNP	N	1.85e-08	0.049	FBgn0033692	wash	washout	156	5PRIME	+	spiracle morphogenesis, open tracheal system ; GO:0035277 | inferred from mutant phenotype <newline> prepupal development ; GO:0035210 | inferred from mutant phenotype <newline> Arp2/3 complex-mediated actin nucleation ; GO:0034314 | inferred from direct assay <newline> oogenesis ; GO:0048477 | inferred from mutant phenotype <newline> microtubule bundle formation ; GO:0001578 | inferred from dire…	transcription factor complex ; GO:0005667 | inferred from physical interaction with Trf2 <newline> endosome ; GO:0005768 | inferred from direct assay <newline> perinuclear region of cytoplasm ; GO:0048471 | inferred from direct assay <newline> cytoplasm ; GO:0005737 | inferred from direct assay <newline> nucleus ; GO:0005634 | inferred from direct assay <newline> filamentous actin ; GO:0031941 | …	GTPase binding ; GO:0051020 | inferred from physical interaction with Rho1 <newline> protein binding ; GO:0005515 | inferred from physical interaction with spir <newline> alpha-tubulin binding ; GO:0043014 | inferred from electronic annotation with InterPro:IPR028290	-
ACCORD_I	2R_8067842_SNP	N	1.85e-08	0.049	FBgn0266802	CR45264	CR45264	592	3PRIME	+	-	-	-	-
ACCORD_I	2R_8068113_SNP	N	7.36e-10	0.049	FBgn0033691	CG8860	CG8860	706	5PRIME	-	SRP-dependent cotranslational protein targeting to membrane, translocation ; GO:0006616 | inferred from sequence or structural similarity with UniProtKB:P38384 <newline> protein transport ; GO:0015031 | inferred from sequence or structural similarity with UniProtKB:P60058 <newline> neurogenesis ; GO:0022008 | inferred from mutant phenotype	Sec61 translocon complex ; GO:0005784 | inferred from sequence or structural similarity with UniProtKB:P38384 <newline> integral component of endoplasmic reticulum membrane ; GO:0030176 | inferred from sequence or structural similarity with UniProtKB:P60058	protein transporter activity ; GO:0008565 | inferred from sequence or structural similarity with UniProtKB:P38384 <newline> protein transporter activity ; GO:0008565 | inferred from sequence or structural similarity with UniProtKB:P60058 <newline> P-P-bond-hydrolysis-driven protein transmembrane transporter activity ; GO:0015450 | inferred from electronic annotation with InterPro:IPR008158	Hsap\SEC61G
ACCORD_I	2R_8068113_SNP	N	7.36e-10	0.049	FBgn0033692	wash	washout	0	INTRON	+	spiracle morphogenesis, open tracheal system ; GO:0035277 | inferred from mutant phenotype <newline> prepupal development ; GO:0035210 | inferred from mutant phenotype <newline> Arp2/3 complex-mediated actin nucleation ; GO:0034314 | inferred from direct assay <newline> oogenesis ; GO:0048477 | inferred from mutant phenotype <newline> microtubule bundle formation ; GO:0001578 | inferred from dire…	transcription factor complex ; GO:0005667 | inferred from physical interaction with Trf2 <newline> endosome ; GO:0005768 | inferred from direct assay <newline> perinuclear region of cytoplasm ; GO:0048471 | inferred from direct assay <newline> cytoplasm ; GO:0005737 | inferred from direct assay <newline> nucleus ; GO:0005634 | inferred from direct assay <newline> filamentous actin ; GO:0031941 | …	GTPase binding ; GO:0051020 | inferred from physical interaction with Rho1 <newline> protein binding ; GO:0005515 | inferred from physical interaction with spir <newline> alpha-tubulin binding ; GO:0043014 | inferred from electronic annotation with InterPro:IPR028290	-
ACCORD_I	2R_8068113_SNP	N	7.36e-10	0.049	FBgn0266802	CR45264	CR45264	863	3PRIME	+	-	-	-	-
ACCORD_I	2R_8068377_SNP	N	2.19e-08	0.049	FBgn0033691	CG8860	CG8860	970	5PRIME	-	SRP-dependent cotranslational protein targeting to membrane, translocation ; GO:0006616 | inferred from sequence or structural similarity with UniProtKB:P38384 <newline> protein transport ; GO:0015031 | inferred from sequence or structural similarity with UniProtKB:P60058 <newline> neurogenesis ; GO:0022008 | inferred from mutant phenotype	Sec61 translocon complex ; GO:0005784 | inferred from sequence or structural similarity with UniProtKB:P38384 <newline> integral component of endoplasmic reticulum membrane ; GO:0030176 | inferred from sequence or structural similarity with UniProtKB:P60058	protein transporter activity ; GO:0008565 | inferred from sequence or structural similarity with UniProtKB:P38384 <newline> protein transporter activity ; GO:0008565 | inferred from sequence or structural similarity with UniProtKB:P60058 <newline> P-P-bond-hydrolysis-driven protein transmembrane transporter activity ; GO:0015450 | inferred from electronic annotation with InterPro:IPR008158	Hsap\SEC61G
ACCORD_I	2R_8068377_SNP	N	2.19e-08	0.049	FBgn0033692	wash	washout	0	EXON	+	spiracle morphogenesis, open tracheal system ; GO:0035277 | inferred from mutant phenotype <newline> prepupal development ; GO:0035210 | inferred from mutant phenotype <newline> Arp2/3 complex-mediated actin nucleation ; GO:0034314 | inferred from direct assay <newline> oogenesis ; GO:0048477 | inferred from mutant phenotype <newline> microtubule bundle formation ; GO:0001578 | inferred from dire…	transcription factor complex ; GO:0005667 | inferred from physical interaction with Trf2 <newline> endosome ; GO:0005768 | inferred from direct assay <newline> perinuclear region of cytoplasm ; GO:0048471 | inferred from direct assay <newline> cytoplasm ; GO:0005737 | inferred from direct assay <newline> nucleus ; GO:0005634 | inferred from direct assay <newline> filamentous actin ; GO:0031941 | …	GTPase binding ; GO:0051020 | inferred from physical interaction with Rho1 <newline> protein binding ; GO:0005515 | inferred from physical interaction with spir <newline> alpha-tubulin binding ; GO:0043014 | inferred from electronic annotation with InterPro:IPR028290	-
ACCORD_I	2R_8068499_SNP	N	1.22e-09	0.049	FBgn0033692	wash	washout	0	EXON	+	spiracle morphogenesis, open tracheal system ; GO:0035277 | inferred from mutant phenotype <newline> prepupal development ; GO:0035210 | inferred from mutant phenotype <newline> Arp2/3 complex-mediated actin nucleation ; GO:0034314 | inferred from direct assay <newline> oogenesis ; GO:0048477 | inferred from mutant phenotype <newline> microtubule bundle formation ; GO:0001578 | inferred from dire…	transcription factor complex ; GO:0005667 | inferred from physical interaction with Trf2 <newline> endosome ; GO:0005768 | inferred from direct assay <newline> perinuclear region of cytoplasm ; GO:0048471 | inferred from direct assay <newline> cytoplasm ; GO:0005737 | inferred from direct assay <newline> nucleus ; GO:0005634 | inferred from direct assay <newline> filamentous actin ; GO:0031941 | …	GTPase binding ; GO:0051020 | inferred from physical interaction with Rho1 <newline> protein binding ; GO:0005515 | inferred from physical interaction with spir <newline> alpha-tubulin binding ; GO:0043014 | inferred from electronic annotation with InterPro:IPR028290	-
ACCORD_I	2R_8069047_SNP	N	5.89e-08	0.049	FBgn0033692	wash	washout	0	EXON	+	spiracle morphogenesis, open tracheal system ; GO:0035277 | inferred from mutant phenotype <newline> prepupal development ; GO:0035210 | inferred from mutant phenotype <newline> Arp2/3 complex-mediated actin nucleation ; GO:0034314 | inferred from direct assay <newline> oogenesis ; GO:0048477 | inferred from mutant phenotype <newline> microtubule bundle formation ; GO:0001578 | inferred from dire…	transcription factor complex ; GO:0005667 | inferred from physical interaction with Trf2 <newline> endosome ; GO:0005768 | inferred from direct assay <newline> perinuclear region of cytoplasm ; GO:0048471 | inferred from direct assay <newline> cytoplasm ; GO:0005737 | inferred from direct assay <newline> nucleus ; GO:0005634 | inferred from direct assay <newline> filamentous actin ; GO:0031941 | …	GTPase binding ; GO:0051020 | inferred from physical interaction with Rho1 <newline> protein binding ; GO:0005515 | inferred from physical interaction with spir <newline> alpha-tubulin binding ; GO:0043014 | inferred from electronic annotation with InterPro:IPR028290	-
ACCORD_I	2R_8069072_SNP	N	7.18e-09	0.049	FBgn0033692	wash	washout	0	EXON	+	spiracle morphogenesis, open tracheal system ; GO:0035277 | inferred from mutant phenotype <newline> prepupal development ; GO:0035210 | inferred from mutant phenotype <newline> Arp2/3 complex-mediated actin nucleation ; GO:0034314 | inferred from direct assay <newline> oogenesis ; GO:0048477 | inferred from mutant phenotype <newline> microtubule bundle formation ; GO:0001578 | inferred from dire…	transcription factor complex ; GO:0005667 | inferred from physical interaction with Trf2 <newline> endosome ; GO:0005768 | inferred from direct assay <newline> perinuclear region of cytoplasm ; GO:0048471 | inferred from direct assay <newline> cytoplasm ; GO:0005737 | inferred from direct assay <newline> nucleus ; GO:0005634 | inferred from direct assay <newline> filamentous actin ; GO:0031941 | …	GTPase binding ; GO:0051020 | inferred from physical interaction with Rho1 <newline> protein binding ; GO:0005515 | inferred from physical interaction with spir <newline> alpha-tubulin binding ; GO:0043014 | inferred from electronic annotation with InterPro:IPR028290	-
ACCORD_I	2R_8069132_SNP	N	6.47e-09	0.049	FBgn0033692	wash	washout	0	EXON	+	spiracle morphogenesis, open tracheal system ; GO:0035277 | inferred from mutant phenotype <newline> prepupal development ; GO:0035210 | inferred from mutant phenotype <newline> Arp2/3 complex-mediated actin nucleation ; GO:0034314 | inferred from direct assay <newline> oogenesis ; GO:0048477 | inferred from mutant phenotype <newline> microtubule bundle formation ; GO:0001578 | inferred from dire…	transcription factor complex ; GO:0005667 | inferred from physical interaction with Trf2 <newline> endosome ; GO:0005768 | inferred from direct assay <newline> perinuclear region of cytoplasm ; GO:0048471 | inferred from direct assay <newline> cytoplasm ; GO:0005737 | inferred from direct assay <newline> nucleus ; GO:0005634 | inferred from direct assay <newline> filamentous actin ; GO:0031941 | …	GTPase binding ; GO:0051020 | inferred from physical interaction with Rho1 <newline> protein binding ; GO:0005515 | inferred from physical interaction with spir <newline> alpha-tubulin binding ; GO:0043014 | inferred from electronic annotation with InterPro:IPR028290	-
ACCORD_I	2R_8070658_SNP	N	2.78e-09	0.049	FBgn0000426	SmF	Small ribonucleoprotein particle protein SmF	691	3PRIME	-	mRNA splicing, via spliceosome ; GO:0000398 | non-traceable author statement <newline> mRNA splicing, via spliceosome ; GO:0000398 | inferred from sequence or structural similarity with NCBI_NP:003086 AND inferred from sequence or structural similarity with SGD_LOCUS:SMX3; SGD:S0006386 <newline> mitotic spindle organization ; GO:0007052 | inferred from mutant phenotype <newline> mRNA splicing, vi…	small nuclear ribonucleoprotein complex ; GO:0030532 | non-traceable author statement <newline> small nuclear ribonucleoprotein complex ; GO:0030532 | inferred from sequence or structural similarity with NCBI_NP:003086 AND inferred from sequence or structural similarity with SGD_LOCUS:SMX3; SGD:S0006386 <newline> spliceosomal complex ; GO:0005681 | inferred from sequence or structural similarity …	-	Hsap\LSM6 <newline> Hsap\SNRPF
ACCORD_I	2R_8070658_SNP	N	2.78e-09	0.049	FBgn0033692	wash	washout	780	3PRIME	+	spiracle morphogenesis, open tracheal system ; GO:0035277 | inferred from mutant phenotype <newline> prepupal development ; GO:0035210 | inferred from mutant phenotype <newline> Arp2/3 complex-mediated actin nucleation ; GO:0034314 | inferred from direct assay <newline> oogenesis ; GO:0048477 | inferred from mutant phenotype <newline> microtubule bundle formation ; GO:0001578 | inferred from dire…	transcription factor complex ; GO:0005667 | inferred from physical interaction with Trf2 <newline> endosome ; GO:0005768 | inferred from direct assay <newline> perinuclear region of cytoplasm ; GO:0048471 | inferred from direct assay <newline> cytoplasm ; GO:0005737 | inferred from direct assay <newline> nucleus ; GO:0005634 | inferred from direct assay <newline> filamentous actin ; GO:0031941 | …	GTPase binding ; GO:0051020 | inferred from physical interaction with Rho1 <newline> protein binding ; GO:0005515 | inferred from physical interaction with spir <newline> alpha-tubulin binding ; GO:0043014 | inferred from electronic annotation with InterPro:IPR028290	-
ACCORD_I	2R_8070658_SNP	N	2.78e-09	0.049	FBgn0033693	CG13175	CG13175	0	EXON	+	-	-	-	-
ACCORD_I	2R_8070658_SNP	N	2.78e-09	0.049	FBgn0053964	CG33964	CG33964	0	EXON	+	-	-	-	Hsap\C12orf26
ACCORD_I	2R_8072295_SNP	N	4.64e-09	0.049	FBgn0000426	SmF	Small ribonucleoprotein particle protein SmF	480	5PRIME	-	mRNA splicing, via spliceosome ; GO:0000398 | non-traceable author statement <newline> mRNA splicing, via spliceosome ; GO:0000398 | inferred from sequence or structural similarity with NCBI_NP:003086 AND inferred from sequence or structural similarity with SGD_LOCUS:SMX3; SGD:S0006386 <newline> mitotic spindle organization ; GO:0007052 | inferred from mutant phenotype <newline> mRNA splicing, vi…	small nuclear ribonucleoprotein complex ; GO:0030532 | non-traceable author statement <newline> small nuclear ribonucleoprotein complex ; GO:0030532 | inferred from sequence or structural similarity with NCBI_NP:003086 AND inferred from sequence or structural similarity with SGD_LOCUS:SMX3; SGD:S0006386 <newline> spliceosomal complex ; GO:0005681 | inferred from sequence or structural similarity …	-	Hsap\LSM6 <newline> Hsap\SNRPF
ACCORD_I	2R_8072295_SNP	N	4.64e-09	0.049	FBgn0025454	Cyp6g1	Cyp6g1	877	5PRIME	+	response to DDT ; GO:0046680 | inferred from mutant phenotype <newline> response to insecticide ; GO:0017085 | inferred from mutant phenotype <newline> response to organophosphorus ; GO:0046683 | inferred from mutant phenotype <newline> insecticide catabolic process ; GO:0046701 | inferred from direct assay <newline> oxidation-reduction process ; GO:0055114 | inferred from electronic annotation w…	membrane ; GO:0016020 | non-traceable author statement <newline> intracellular membrane-bounded organelle ; GO:0043231 | non-traceable author statement	electron carrier activity ; GO:0009055 | non-traceable author statement <newline> electron carrier activity ; GO:0009055 | inferred from sequence or structural similarity <newline> oxidoreductase activity, acting on paired donors, with incorporation or reduction of molecular oxygen ; GO:0016705 | inferred from electronic annotation with InterPro:IPR001128, InterPro:IPR002401, InterPro:IPR017972 <…	-
ACCORD_I	2R_8072295_SNP	N	4.64e-09	0.049	FBgn0033693	CG13175	CG13175	0	EXON	+	-	-	-	-
ACCORD_I	2R_8072295_SNP	N	4.64e-09	0.049	FBgn0053964	CG33964	CG33964	0	EXON	+	-	-	-	Hsap\C12orf26
ACCORD_I	2R_8075284_SNP	N	7.18e-07	0.049	FBgn0025454	Cyp6g1	Cyp6g1	0	INTRON	+	response to DDT ; GO:0046680 | inferred from mutant phenotype <newline> response to insecticide ; GO:0017085 | inferred from mutant phenotype <newline> response to organophosphorus ; GO:0046683 | inferred from mutant phenotype <newline> insecticide catabolic process ; GO:0046701 | inferred from direct assay <newline> oxidation-reduction process ; GO:0055114 | inferred from electronic annotation w…	membrane ; GO:0016020 | non-traceable author statement <newline> intracellular membrane-bounded organelle ; GO:0043231 | non-traceable author statement	electron carrier activity ; GO:0009055 | non-traceable author statement <newline> electron carrier activity ; GO:0009055 | inferred from sequence or structural similarity <newline> oxidoreductase activity, acting on paired donors, with incorporation or reduction of molecular oxygen ; GO:0016705 | inferred from electronic annotation with InterPro:IPR001128, InterPro:IPR002401, InterPro:IPR017972 <…	-
ACCORD_I	2R_8075284_SNP	N	7.18e-07	0.049	FBgn0033696	Cyp6g2	Cyp6g2	559	3PRIME	-	oxidation-reduction process ; GO:0055114 | inferred from electronic annotation with InterPro:IPR001128, InterPro:IPR002403, InterPro:IPR017972 <newline> response to insecticide ; GO:0017085 | inferred from mutant phenotype	membrane ; GO:0016020 | non-traceable author statement <newline> intracellular membrane-bounded organelle ; GO:0043231 | non-traceable author statement	electron carrier activity ; GO:0009055 | non-traceable author statement <newline> electron carrier activity ; GO:0009055 | inferred from sequence or structural similarity <newline> oxidoreductase activity, acting on paired donors, with incorporation or reduction of molecular oxygen ; GO:0016705 | inferred from electronic annotation with InterPro:IPR001128, InterPro:IPR002403, InterPro:IPR017972 <…	-
ACCORD_I	2R_8075323_SNP	N	1.74e-07	0.049	FBgn0025454	Cyp6g1	Cyp6g1	0	INTRON	+	response to DDT ; GO:0046680 | inferred from mutant phenotype <newline> response to insecticide ; GO:0017085 | inferred from mutant phenotype <newline> response to organophosphorus ; GO:0046683 | inferred from mutant phenotype <newline> insecticide catabolic process ; GO:0046701 | inferred from direct assay <newline> oxidation-reduction process ; GO:0055114 | inferred from electronic annotation w…	membrane ; GO:0016020 | non-traceable author statement <newline> intracellular membrane-bounded organelle ; GO:0043231 | non-traceable author statement	electron carrier activity ; GO:0009055 | non-traceable author statement <newline> electron carrier activity ; GO:0009055 | inferred from sequence or structural similarity <newline> oxidoreductase activity, acting on paired donors, with incorporation or reduction of molecular oxygen ; GO:0016705 | inferred from electronic annotation with InterPro:IPR001128, InterPro:IPR002401, InterPro:IPR017972 <…	-
ACCORD_I	2R_8075323_SNP	N	1.74e-07	0.049	FBgn0033696	Cyp6g2	Cyp6g2	520	3PRIME	-	oxidation-reduction process ; GO:0055114 | inferred from electronic annotation with InterPro:IPR001128, InterPro:IPR002403, InterPro:IPR017972 <newline> response to insecticide ; GO:0017085 | inferred from mutant phenotype	membrane ; GO:0016020 | non-traceable author statement <newline> intracellular membrane-bounded organelle ; GO:0043231 | non-traceable author statement	electron carrier activity ; GO:0009055 | non-traceable author statement <newline> electron carrier activity ; GO:0009055 | inferred from sequence or structural similarity <newline> oxidoreductase activity, acting on paired donors, with incorporation or reduction of molecular oxygen ; GO:0016705 | inferred from electronic annotation with InterPro:IPR001128, InterPro:IPR002403, InterPro:IPR017972 <…	-
ACCORD_I	2R_8076397_SNP	N	1.31e-06	0.049	FBgn0025454	Cyp6g1	Cyp6g1	461	3PRIME	+	response to DDT ; GO:0046680 | inferred from mutant phenotype <newline> response to insecticide ; GO:0017085 | inferred from mutant phenotype <newline> response to organophosphorus ; GO:0046683 | inferred from mutant phenotype <newline> insecticide catabolic process ; GO:0046701 | inferred from direct assay <newline> oxidation-reduction process ; GO:0055114 | inferred from electronic annotation w…	membrane ; GO:0016020 | non-traceable author statement <newline> intracellular membrane-bounded organelle ; GO:0043231 | non-traceable author statement	electron carrier activity ; GO:0009055 | non-traceable author statement <newline> electron carrier activity ; GO:0009055 | inferred from sequence or structural similarity <newline> oxidoreductase activity, acting on paired donors, with incorporation or reduction of molecular oxygen ; GO:0016705 | inferred from electronic annotation with InterPro:IPR001128, InterPro:IPR002401, InterPro:IPR017972 <…	-
ACCORD_I	2R_8076397_SNP	N	1.31e-06	0.049	FBgn0033696	Cyp6g2	Cyp6g2	0	EXON	-	oxidation-reduction process ; GO:0055114 | inferred from electronic annotation with InterPro:IPR001128, InterPro:IPR002403, InterPro:IPR017972 <newline> response to insecticide ; GO:0017085 | inferred from mutant phenotype	membrane ; GO:0016020 | non-traceable author statement <newline> intracellular membrane-bounded organelle ; GO:0043231 | non-traceable author statement	electron carrier activity ; GO:0009055 | non-traceable author statement <newline> electron carrier activity ; GO:0009055 | inferred from sequence or structural similarity <newline> oxidoreductase activity, acting on paired donors, with incorporation or reduction of molecular oxygen ; GO:0016705 | inferred from electronic annotation with InterPro:IPR001128, InterPro:IPR002403, InterPro:IPR017972 <…	-
ACCORD_I	2R_8077937_SNP	N	5.33e-09	0.049	FBgn0033696	Cyp6g2	Cyp6g2	55	5PRIME	-	oxidation-reduction process ; GO:0055114 | inferred from electronic annotation with InterPro:IPR001128, InterPro:IPR002403, InterPro:IPR017972 <newline> response to insecticide ; GO:0017085 | inferred from mutant phenotype	membrane ; GO:0016020 | non-traceable author statement <newline> intracellular membrane-bounded organelle ; GO:0043231 | non-traceable author statement	electron carrier activity ; GO:0009055 | non-traceable author statement <newline> electron carrier activity ; GO:0009055 | inferred from sequence or structural similarity <newline> oxidoreductase activity, acting on paired donors, with incorporation or reduction of molecular oxygen ; GO:0016705 | inferred from electronic annotation with InterPro:IPR001128, InterPro:IPR002403, InterPro:IPR017972 <…	-
ACCORD_I	2R_8077937_SNP	N	5.33e-09	0.049	FBgn0033697	Cyp6t3	Cyp6t3	250	5PRIME	+	oxidation-reduction process ; GO:0055114 | inferred from electronic annotation with InterPro:IPR001128, InterPro:IPR002401, InterPro:IPR017972 <newline> regulation of developmental growth ; GO:0048638 | inferred from mutant phenotype <newline> ecdysone biosynthetic process ; GO:0006697 | inferred from mutant phenotype	membrane ; GO:0016020 | non-traceable author statement <newline> intracellular membrane-bounded organelle ; GO:0043231 | non-traceable author statement	electron carrier activity ; GO:0009055 | non-traceable author statement <newline> electron carrier activity ; GO:0009055 | inferred from sequence or structural similarity <newline> oxidoreductase activity, acting on paired donors, with incorporation or reduction of molecular oxygen ; GO:0016705 | inferred from electronic annotation with InterPro:IPR001128, InterPro:IPR002401, InterPro:IPR017972 <…	-
ACCORD_I	2R_8077957_SNP	N	3.11e-10	0.049	FBgn0033696	Cyp6g2	Cyp6g2	75	5PRIME	-	oxidation-reduction process ; GO:0055114 | inferred from electronic annotation with InterPro:IPR001128, InterPro:IPR002403, InterPro:IPR017972 <newline> response to insecticide ; GO:0017085 | inferred from mutant phenotype	membrane ; GO:0016020 | non-traceable author statement <newline> intracellular membrane-bounded organelle ; GO:0043231 | non-traceable author statement	electron carrier activity ; GO:0009055 | non-traceable author statement <newline> electron carrier activity ; GO:0009055 | inferred from sequence or structural similarity <newline> oxidoreductase activity, acting on paired donors, with incorporation or reduction of molecular oxygen ; GO:0016705 | inferred from electronic annotation with InterPro:IPR001128, InterPro:IPR002403, InterPro:IPR017972 <…	-
ACCORD_I	2R_8077957_SNP	N	3.11e-10	0.049	FBgn0033697	Cyp6t3	Cyp6t3	230	5PRIME	+	oxidation-reduction process ; GO:0055114 | inferred from electronic annotation with InterPro:IPR001128, InterPro:IPR002401, InterPro:IPR017972 <newline> regulation of developmental growth ; GO:0048638 | inferred from mutant phenotype <newline> ecdysone biosynthetic process ; GO:0006697 | inferred from mutant phenotype	membrane ; GO:0016020 | non-traceable author statement <newline> intracellular membrane-bounded organelle ; GO:0043231 | non-traceable author statement	electron carrier activity ; GO:0009055 | non-traceable author statement <newline> electron carrier activity ; GO:0009055 | inferred from sequence or structural similarity <newline> oxidoreductase activity, acting on paired donors, with incorporation or reduction of molecular oxygen ; GO:0016705 | inferred from electronic annotation with InterPro:IPR001128, InterPro:IPR002401, InterPro:IPR017972 <…	-
ACCORD_I	2R_8077982_SNP	N	2.84e-10	0.049	FBgn0033696	Cyp6g2	Cyp6g2	100	5PRIME	-	oxidation-reduction process ; GO:0055114 | inferred from electronic annotation with InterPro:IPR001128, InterPro:IPR002403, InterPro:IPR017972 <newline> response to insecticide ; GO:0017085 | inferred from mutant phenotype	membrane ; GO:0016020 | non-traceable author statement <newline> intracellular membrane-bounded organelle ; GO:0043231 | non-traceable author statement	electron carrier activity ; GO:0009055 | non-traceable author statement <newline> electron carrier activity ; GO:0009055 | inferred from sequence or structural similarity <newline> oxidoreductase activity, acting on paired donors, with incorporation or reduction of molecular oxygen ; GO:0016705 | inferred from electronic annotation with InterPro:IPR001128, InterPro:IPR002403, InterPro:IPR017972 <…	-
ACCORD_I	2R_8077982_SNP	N	2.84e-10	0.049	FBgn0033697	Cyp6t3	Cyp6t3	205	5PRIME	+	oxidation-reduction process ; GO:0055114 | inferred from electronic annotation with InterPro:IPR001128, InterPro:IPR002401, InterPro:IPR017972 <newline> regulation of developmental growth ; GO:0048638 | inferred from mutant phenotype <newline> ecdysone biosynthetic process ; GO:0006697 | inferred from mutant phenotype	membrane ; GO:0016020 | non-traceable author statement <newline> intracellular membrane-bounded organelle ; GO:0043231 | non-traceable author statement	electron carrier activity ; GO:0009055 | non-traceable author statement <newline> electron carrier activity ; GO:0009055 | inferred from sequence or structural similarity <newline> oxidoreductase activity, acting on paired donors, with incorporation or reduction of molecular oxygen ; GO:0016705 | inferred from electronic annotation with InterPro:IPR001128, InterPro:IPR002401, InterPro:IPR017972 <…	-
ACCORD_I	2R_8078006_INS	N	3.34e-08	0.049	FBgn0033696	Cyp6g2	Cyp6g2	124	5PRIME	-	oxidation-reduction process ; GO:0055114 | inferred from electronic annotation with InterPro:IPR001128, InterPro:IPR002403, InterPro:IPR017972 <newline> response to insecticide ; GO:0017085 | inferred from mutant phenotype	membrane ; GO:0016020 | non-traceable author statement <newline> intracellular membrane-bounded organelle ; GO:0043231 | non-traceable author statement	electron carrier activity ; GO:0009055 | non-traceable author statement <newline> electron carrier activity ; GO:0009055 | inferred from sequence or structural similarity <newline> oxidoreductase activity, acting on paired donors, with incorporation or reduction of molecular oxygen ; GO:0016705 | inferred from electronic annotation with InterPro:IPR001128, InterPro:IPR002403, InterPro:IPR017972 <…	-
ACCORD_I	2R_8078006_INS	N	3.34e-08	0.049	FBgn0033697	Cyp6t3	Cyp6t3	181	5PRIME	+	oxidation-reduction process ; GO:0055114 | inferred from electronic annotation with InterPro:IPR001128, InterPro:IPR002401, InterPro:IPR017972 <newline> regulation of developmental growth ; GO:0048638 | inferred from mutant phenotype <newline> ecdysone biosynthetic process ; GO:0006697 | inferred from mutant phenotype	membrane ; GO:0016020 | non-traceable author statement <newline> intracellular membrane-bounded organelle ; GO:0043231 | non-traceable author statement	electron carrier activity ; GO:0009055 | non-traceable author statement <newline> electron carrier activity ; GO:0009055 | inferred from sequence or structural similarity <newline> oxidoreductase activity, acting on paired donors, with incorporation or reduction of molecular oxygen ; GO:0016705 | inferred from electronic annotation with InterPro:IPR001128, InterPro:IPR002401, InterPro:IPR017972 <…	-
ACCORD_I	2R_8078014_SNP	N	4.8e-10	0.049	FBgn0033696	Cyp6g2	Cyp6g2	132	5PRIME	-	oxidation-reduction process ; GO:0055114 | inferred from electronic annotation with InterPro:IPR001128, InterPro:IPR002403, InterPro:IPR017972 <newline> response to insecticide ; GO:0017085 | inferred from mutant phenotype	membrane ; GO:0016020 | non-traceable author statement <newline> intracellular membrane-bounded organelle ; GO:0043231 | non-traceable author statement	electron carrier activity ; GO:0009055 | non-traceable author statement <newline> electron carrier activity ; GO:0009055 | inferred from sequence or structural similarity <newline> oxidoreductase activity, acting on paired donors, with incorporation or reduction of molecular oxygen ; GO:0016705 | inferred from electronic annotation with InterPro:IPR001128, InterPro:IPR002403, InterPro:IPR017972 <…	-
ACCORD_I	2R_8078014_SNP	N	4.8e-10	0.049	FBgn0033697	Cyp6t3	Cyp6t3	173	5PRIME	+	oxidation-reduction process ; GO:0055114 | inferred from electronic annotation with InterPro:IPR001128, InterPro:IPR002401, InterPro:IPR017972 <newline> regulation of developmental growth ; GO:0048638 | inferred from mutant phenotype <newline> ecdysone biosynthetic process ; GO:0006697 | inferred from mutant phenotype	membrane ; GO:0016020 | non-traceable author statement <newline> intracellular membrane-bounded organelle ; GO:0043231 | non-traceable author statement	electron carrier activity ; GO:0009055 | non-traceable author statement <newline> electron carrier activity ; GO:0009055 | inferred from sequence or structural similarity <newline> oxidoreductase activity, acting on paired donors, with incorporation or reduction of molecular oxygen ; GO:0016705 | inferred from electronic annotation with InterPro:IPR001128, InterPro:IPR002401, InterPro:IPR017972 <…	-
ACCORD_I	2R_8078088_SNP	N	1.73e-07	0.049	FBgn0033696	Cyp6g2	Cyp6g2	206	5PRIME	-	oxidation-reduction process ; GO:0055114 | inferred from electronic annotation with InterPro:IPR001128, InterPro:IPR002403, InterPro:IPR017972 <newline> response to insecticide ; GO:0017085 | inferred from mutant phenotype	membrane ; GO:0016020 | non-traceable author statement <newline> intracellular membrane-bounded organelle ; GO:0043231 | non-traceable author statement	electron carrier activity ; GO:0009055 | non-traceable author statement <newline> electron carrier activity ; GO:0009055 | inferred from sequence or structural similarity <newline> oxidoreductase activity, acting on paired donors, with incorporation or reduction of molecular oxygen ; GO:0016705 | inferred from electronic annotation with InterPro:IPR001128, InterPro:IPR002403, InterPro:IPR017972 <…	-
ACCORD_I	2R_8078088_SNP	N	1.73e-07	0.049	FBgn0033697	Cyp6t3	Cyp6t3	99	5PRIME	+	oxidation-reduction process ; GO:0055114 | inferred from electronic annotation with InterPro:IPR001128, InterPro:IPR002401, InterPro:IPR017972 <newline> regulation of developmental growth ; GO:0048638 | inferred from mutant phenotype <newline> ecdysone biosynthetic process ; GO:0006697 | inferred from mutant phenotype	membrane ; GO:0016020 | non-traceable author statement <newline> intracellular membrane-bounded organelle ; GO:0043231 | non-traceable author statement	electron carrier activity ; GO:0009055 | non-traceable author statement <newline> electron carrier activity ; GO:0009055 | inferred from sequence or structural similarity <newline> oxidoreductase activity, acting on paired donors, with incorporation or reduction of molecular oxygen ; GO:0016705 | inferred from electronic annotation with InterPro:IPR001128, InterPro:IPR002401, InterPro:IPR017972 <…	-
ACCORD_I	2R_8078861_SNP	N	1.63e-10	0.049	FBgn0033696	Cyp6g2	Cyp6g2	979	5PRIME	-	oxidation-reduction process ; GO:0055114 | inferred from electronic annotation with InterPro:IPR001128, InterPro:IPR002403, InterPro:IPR017972 <newline> response to insecticide ; GO:0017085 | inferred from mutant phenotype	membrane ; GO:0016020 | non-traceable author statement <newline> intracellular membrane-bounded organelle ; GO:0043231 | non-traceable author statement	electron carrier activity ; GO:0009055 | non-traceable author statement <newline> electron carrier activity ; GO:0009055 | inferred from sequence or structural similarity <newline> oxidoreductase activity, acting on paired donors, with incorporation or reduction of molecular oxygen ; GO:0016705 | inferred from electronic annotation with InterPro:IPR001128, InterPro:IPR002403, InterPro:IPR017972 <…	-
ACCORD_I	2R_8078861_SNP	N	1.63e-10	0.049	FBgn0033697	Cyp6t3	Cyp6t3	0	EXON	+	oxidation-reduction process ; GO:0055114 | inferred from electronic annotation with InterPro:IPR001128, InterPro:IPR002401, InterPro:IPR017972 <newline> regulation of developmental growth ; GO:0048638 | inferred from mutant phenotype <newline> ecdysone biosynthetic process ; GO:0006697 | inferred from mutant phenotype	membrane ; GO:0016020 | non-traceable author statement <newline> intracellular membrane-bounded organelle ; GO:0043231 | non-traceable author statement	electron carrier activity ; GO:0009055 | non-traceable author statement <newline> electron carrier activity ; GO:0009055 | inferred from sequence or structural similarity <newline> oxidoreductase activity, acting on paired donors, with incorporation or reduction of molecular oxygen ; GO:0016705 | inferred from electronic annotation with InterPro:IPR001128, InterPro:IPR002401, InterPro:IPR017972 <…	-
ACCORD_I	2R_8079080_SNP	N	2.57e-07	0.049	FBgn0033697	Cyp6t3	Cyp6t3	0	EXON	+	oxidation-reduction process ; GO:0055114 | inferred from electronic annotation with InterPro:IPR001128, InterPro:IPR002401, InterPro:IPR017972 <newline> regulation of developmental growth ; GO:0048638 | inferred from mutant phenotype <newline> ecdysone biosynthetic process ; GO:0006697 | inferred from mutant phenotype	membrane ; GO:0016020 | non-traceable author statement <newline> intracellular membrane-bounded organelle ; GO:0043231 | non-traceable author statement	electron carrier activity ; GO:0009055 | non-traceable author statement <newline> electron carrier activity ; GO:0009055 | inferred from sequence or structural similarity <newline> oxidoreductase activity, acting on paired donors, with incorporation or reduction of molecular oxygen ; GO:0016705 | inferred from electronic annotation with InterPro:IPR001128, InterPro:IPR002401, InterPro:IPR017972 <…	-
ACCORD_I	2R_8079080_SNP	N	2.57e-07	0.049	FBgn0033698	CG8858	CG8858	799	3PRIME	-	biological_process ; GO:0008150 | no biological data available	cytoplasm ; GO:0005737 | inferred from sequence or structural similarity with UniProtKB:P38737 <newline> nucleus ; GO:0005634 | inferred from sequence or structural similarity with UniProtKB:P38737 <newline> proteasome complex ; GO:0000502 | inferred from sequence or structural similarity with UniProtKB:P38737	molecular_function ; GO:0003674 | no biological data available	Hsap\ENSG00000136813
ACCORD_I	2R_8079175_SNP	N	7.35e-10	0.049	FBgn0033697	Cyp6t3	Cyp6t3	0	EXON	+	oxidation-reduction process ; GO:0055114 | inferred from electronic annotation with InterPro:IPR001128, InterPro:IPR002401, InterPro:IPR017972 <newline> regulation of developmental growth ; GO:0048638 | inferred from mutant phenotype <newline> ecdysone biosynthetic process ; GO:0006697 | inferred from mutant phenotype	membrane ; GO:0016020 | non-traceable author statement <newline> intracellular membrane-bounded organelle ; GO:0043231 | non-traceable author statement	electron carrier activity ; GO:0009055 | non-traceable author statement <newline> electron carrier activity ; GO:0009055 | inferred from sequence or structural similarity <newline> oxidoreductase activity, acting on paired donors, with incorporation or reduction of molecular oxygen ; GO:0016705 | inferred from electronic annotation with InterPro:IPR001128, InterPro:IPR002401, InterPro:IPR017972 <…	-
ACCORD_I	2R_8079175_SNP	N	7.35e-10	0.049	FBgn0033698	CG8858	CG8858	704	3PRIME	-	biological_process ; GO:0008150 | no biological data available	cytoplasm ; GO:0005737 | inferred from sequence or structural similarity with UniProtKB:P38737 <newline> nucleus ; GO:0005634 | inferred from sequence or structural similarity with UniProtKB:P38737 <newline> proteasome complex ; GO:0000502 | inferred from sequence or structural similarity with UniProtKB:P38737	molecular_function ; GO:0003674 | no biological data available	Hsap\ENSG00000136813
ACCORD_I	2R_8079280_SNP	N	4.03e-10	0.049	FBgn0033697	Cyp6t3	Cyp6t3	0	EXON	+	oxidation-reduction process ; GO:0055114 | inferred from electronic annotation with InterPro:IPR001128, InterPro:IPR002401, InterPro:IPR017972 <newline> regulation of developmental growth ; GO:0048638 | inferred from mutant phenotype <newline> ecdysone biosynthetic process ; GO:0006697 | inferred from mutant phenotype	membrane ; GO:0016020 | non-traceable author statement <newline> intracellular membrane-bounded organelle ; GO:0043231 | non-traceable author statement	electron carrier activity ; GO:0009055 | non-traceable author statement <newline> electron carrier activity ; GO:0009055 | inferred from sequence or structural similarity <newline> oxidoreductase activity, acting on paired donors, with incorporation or reduction of molecular oxygen ; GO:0016705 | inferred from electronic annotation with InterPro:IPR001128, InterPro:IPR002401, InterPro:IPR017972 <…	-
ACCORD_I	2R_8079280_SNP	N	4.03e-10	0.049	FBgn0033698	CG8858	CG8858	599	3PRIME	-	biological_process ; GO:0008150 | no biological data available	cytoplasm ; GO:0005737 | inferred from sequence or structural similarity with UniProtKB:P38737 <newline> nucleus ; GO:0005634 | inferred from sequence or structural similarity with UniProtKB:P38737 <newline> proteasome complex ; GO:0000502 | inferred from sequence or structural similarity with UniProtKB:P38737	molecular_function ; GO:0003674 | no biological data available	Hsap\ENSG00000136813
ACCORD_I	2R_8079334_SNP	N	4.81e-08	0.049	FBgn0033697	Cyp6t3	Cyp6t3	0	EXON	+	oxidation-reduction process ; GO:0055114 | inferred from electronic annotation with InterPro:IPR001128, InterPro:IPR002401, InterPro:IPR017972 <newline> regulation of developmental growth ; GO:0048638 | inferred from mutant phenotype <newline> ecdysone biosynthetic process ; GO:0006697 | inferred from mutant phenotype	membrane ; GO:0016020 | non-traceable author statement <newline> intracellular membrane-bounded organelle ; GO:0043231 | non-traceable author statement	electron carrier activity ; GO:0009055 | non-traceable author statement <newline> electron carrier activity ; GO:0009055 | inferred from sequence or structural similarity <newline> oxidoreductase activity, acting on paired donors, with incorporation or reduction of molecular oxygen ; GO:0016705 | inferred from electronic annotation with InterPro:IPR001128, InterPro:IPR002401, InterPro:IPR017972 <…	-
ACCORD_I	2R_8079334_SNP	N	4.81e-08	0.049	FBgn0033698	CG8858	CG8858	545	3PRIME	-	biological_process ; GO:0008150 | no biological data available	cytoplasm ; GO:0005737 | inferred from sequence or structural similarity with UniProtKB:P38737 <newline> nucleus ; GO:0005634 | inferred from sequence or structural similarity with UniProtKB:P38737 <newline> proteasome complex ; GO:0000502 | inferred from sequence or structural similarity with UniProtKB:P38737	molecular_function ; GO:0003674 | no biological data available	Hsap\ENSG00000136813
ACCORD_I	2R_8079569_SNP	N	7.17e-10	0.049	FBgn0033697	Cyp6t3	Cyp6t3	0	EXON	+	oxidation-reduction process ; GO:0055114 | inferred from electronic annotation with InterPro:IPR001128, InterPro:IPR002401, InterPro:IPR017972 <newline> regulation of developmental growth ; GO:0048638 | inferred from mutant phenotype <newline> ecdysone biosynthetic process ; GO:0006697 | inferred from mutant phenotype	membrane ; GO:0016020 | non-traceable author statement <newline> intracellular membrane-bounded organelle ; GO:0043231 | non-traceable author statement	electron carrier activity ; GO:0009055 | non-traceable author statement <newline> electron carrier activity ; GO:0009055 | inferred from sequence or structural similarity <newline> oxidoreductase activity, acting on paired donors, with incorporation or reduction of molecular oxygen ; GO:0016705 | inferred from electronic annotation with InterPro:IPR001128, InterPro:IPR002401, InterPro:IPR017972 <…	-
ACCORD_I	2R_8079569_SNP	N	7.17e-10	0.049	FBgn0033698	CG8858	CG8858	310	3PRIME	-	biological_process ; GO:0008150 | no biological data available	cytoplasm ; GO:0005737 | inferred from sequence or structural similarity with UniProtKB:P38737 <newline> nucleus ; GO:0005634 | inferred from sequence or structural similarity with UniProtKB:P38737 <newline> proteasome complex ; GO:0000502 | inferred from sequence or structural similarity with UniProtKB:P38737	molecular_function ; GO:0003674 | no biological data available	Hsap\ENSG00000136813
ACCORD_I	2R_8079628_SNP	N	1.65e-07	0.049	FBgn0033697	Cyp6t3	Cyp6t3	0	EXON	+	oxidation-reduction process ; GO:0055114 | inferred from electronic annotation with InterPro:IPR001128, InterPro:IPR002401, InterPro:IPR017972 <newline> regulation of developmental growth ; GO:0048638 | inferred from mutant phenotype <newline> ecdysone biosynthetic process ; GO:0006697 | inferred from mutant phenotype	membrane ; GO:0016020 | non-traceable author statement <newline> intracellular membrane-bounded organelle ; GO:0043231 | non-traceable author statement	electron carrier activity ; GO:0009055 | non-traceable author statement <newline> electron carrier activity ; GO:0009055 | inferred from sequence or structural similarity <newline> oxidoreductase activity, acting on paired donors, with incorporation or reduction of molecular oxygen ; GO:0016705 | inferred from electronic annotation with InterPro:IPR001128, InterPro:IPR002401, InterPro:IPR017972 <…	-
ACCORD_I	2R_8079628_SNP	N	1.65e-07	0.049	FBgn0033698	CG8858	CG8858	251	3PRIME	-	biological_process ; GO:0008150 | no biological data available	cytoplasm ; GO:0005737 | inferred from sequence or structural similarity with UniProtKB:P38737 <newline> nucleus ; GO:0005634 | inferred from sequence or structural similarity with UniProtKB:P38737 <newline> proteasome complex ; GO:0000502 | inferred from sequence or structural similarity with UniProtKB:P38737	molecular_function ; GO:0003674 | no biological data available	Hsap\ENSG00000136813
ACCORD_I	2R_8079629_SNP	N	3.01e-08	0.049	FBgn0033697	Cyp6t3	Cyp6t3	0	EXON	+	oxidation-reduction process ; GO:0055114 | inferred from electronic annotation with InterPro:IPR001128, InterPro:IPR002401, InterPro:IPR017972 <newline> regulation of developmental growth ; GO:0048638 | inferred from mutant phenotype <newline> ecdysone biosynthetic process ; GO:0006697 | inferred from mutant phenotype	membrane ; GO:0016020 | non-traceable author statement <newline> intracellular membrane-bounded organelle ; GO:0043231 | non-traceable author statement	electron carrier activity ; GO:0009055 | non-traceable author statement <newline> electron carrier activity ; GO:0009055 | inferred from sequence or structural similarity <newline> oxidoreductase activity, acting on paired donors, with incorporation or reduction of molecular oxygen ; GO:0016705 | inferred from electronic annotation with InterPro:IPR001128, InterPro:IPR002401, InterPro:IPR017972 <…	-
ACCORD_I	2R_8079629_SNP	N	3.01e-08	0.049	FBgn0033698	CG8858	CG8858	250	3PRIME	-	biological_process ; GO:0008150 | no biological data available	cytoplasm ; GO:0005737 | inferred from sequence or structural similarity with UniProtKB:P38737 <newline> nucleus ; GO:0005634 | inferred from sequence or structural similarity with UniProtKB:P38737 <newline> proteasome complex ; GO:0000502 | inferred from sequence or structural similarity with UniProtKB:P38737	molecular_function ; GO:0003674 | no biological data available	Hsap\ENSG00000136813
ACCORD_I	2R_8079674_SNP	N	9.82e-08	0.049	FBgn0033697	Cyp6t3	Cyp6t3	0	EXON	+	oxidation-reduction process ; GO:0055114 | inferred from electronic annotation with InterPro:IPR001128, InterPro:IPR002401, InterPro:IPR017972 <newline> regulation of developmental growth ; GO:0048638 | inferred from mutant phenotype <newline> ecdysone biosynthetic process ; GO:0006697 | inferred from mutant phenotype	membrane ; GO:0016020 | non-traceable author statement <newline> intracellular membrane-bounded organelle ; GO:0043231 | non-traceable author statement	electron carrier activity ; GO:0009055 | non-traceable author statement <newline> electron carrier activity ; GO:0009055 | inferred from sequence or structural similarity <newline> oxidoreductase activity, acting on paired donors, with incorporation or reduction of molecular oxygen ; GO:0016705 | inferred from electronic annotation with InterPro:IPR001128, InterPro:IPR002401, InterPro:IPR017972 <…	-
ACCORD_I	2R_8079674_SNP	N	9.82e-08	0.049	FBgn0033698	CG8858	CG8858	205	3PRIME	-	biological_process ; GO:0008150 | no biological data available	cytoplasm ; GO:0005737 | inferred from sequence or structural similarity with UniProtKB:P38737 <newline> nucleus ; GO:0005634 | inferred from sequence or structural similarity with UniProtKB:P38737 <newline> proteasome complex ; GO:0000502 | inferred from sequence or structural similarity with UniProtKB:P38737	molecular_function ; GO:0003674 | no biological data available	Hsap\ENSG00000136813
ACCORD_I	2R_8079717_SNP	N	4.29e-07	0.049	FBgn0033697	Cyp6t3	Cyp6t3	0	EXON	+	oxidation-reduction process ; GO:0055114 | inferred from electronic annotation with InterPro:IPR001128, InterPro:IPR002401, InterPro:IPR017972 <newline> regulation of developmental growth ; GO:0048638 | inferred from mutant phenotype <newline> ecdysone biosynthetic process ; GO:0006697 | inferred from mutant phenotype	membrane ; GO:0016020 | non-traceable author statement <newline> intracellular membrane-bounded organelle ; GO:0043231 | non-traceable author statement	electron carrier activity ; GO:0009055 | non-traceable author statement <newline> electron carrier activity ; GO:0009055 | inferred from sequence or structural similarity <newline> oxidoreductase activity, acting on paired donors, with incorporation or reduction of molecular oxygen ; GO:0016705 | inferred from electronic annotation with InterPro:IPR001128, InterPro:IPR002401, InterPro:IPR017972 <…	-
ACCORD_I	2R_8079717_SNP	N	4.29e-07	0.049	FBgn0033698	CG8858	CG8858	162	3PRIME	-	biological_process ; GO:0008150 | no biological data available	cytoplasm ; GO:0005737 | inferred from sequence or structural similarity with UniProtKB:P38737 <newline> nucleus ; GO:0005634 | inferred from sequence or structural similarity with UniProtKB:P38737 <newline> proteasome complex ; GO:0000502 | inferred from sequence or structural similarity with UniProtKB:P38737	molecular_function ; GO:0003674 | no biological data available	Hsap\ENSG00000136813
ACCORD_I	2R_8079934_SNP	N	4.38e-07	0.049	FBgn0033697	Cyp6t3	Cyp6t3	0	EXON	+	oxidation-reduction process ; GO:0055114 | inferred from electronic annotation with InterPro:IPR001128, InterPro:IPR002401, InterPro:IPR017972 <newline> regulation of developmental growth ; GO:0048638 | inferred from mutant phenotype <newline> ecdysone biosynthetic process ; GO:0006697 | inferred from mutant phenotype	membrane ; GO:0016020 | non-traceable author statement <newline> intracellular membrane-bounded organelle ; GO:0043231 | non-traceable author statement	electron carrier activity ; GO:0009055 | non-traceable author statement <newline> electron carrier activity ; GO:0009055 | inferred from sequence or structural similarity <newline> oxidoreductase activity, acting on paired donors, with incorporation or reduction of molecular oxygen ; GO:0016705 | inferred from electronic annotation with InterPro:IPR001128, InterPro:IPR002401, InterPro:IPR017972 <…	-
ACCORD_I	2R_8079934_SNP	N	4.38e-07	0.049	FBgn0033698	CG8858	CG8858	0	EXON	-	biological_process ; GO:0008150 | no biological data available	cytoplasm ; GO:0005737 | inferred from sequence or structural similarity with UniProtKB:P38737 <newline> nucleus ; GO:0005634 | inferred from sequence or structural similarity with UniProtKB:P38737 <newline> proteasome complex ; GO:0000502 | inferred from sequence or structural similarity with UniProtKB:P38737	molecular_function ; GO:0003674 | no biological data available	Hsap\ENSG00000136813
ACCORD_I	2R_8080226_SNP	N	5.17e-09	0.049	FBgn0033697	Cyp6t3	Cyp6t3	285	3PRIME	+	oxidation-reduction process ; GO:0055114 | inferred from electronic annotation with InterPro:IPR001128, InterPro:IPR002401, InterPro:IPR017972 <newline> regulation of developmental growth ; GO:0048638 | inferred from mutant phenotype <newline> ecdysone biosynthetic process ; GO:0006697 | inferred from mutant phenotype	membrane ; GO:0016020 | non-traceable author statement <newline> intracellular membrane-bounded organelle ; GO:0043231 | non-traceable author statement	electron carrier activity ; GO:0009055 | non-traceable author statement <newline> electron carrier activity ; GO:0009055 | inferred from sequence or structural similarity <newline> oxidoreductase activity, acting on paired donors, with incorporation or reduction of molecular oxygen ; GO:0016705 | inferred from electronic annotation with InterPro:IPR001128, InterPro:IPR002401, InterPro:IPR017972 <…	-
ACCORD_I	2R_8080226_SNP	N	5.17e-09	0.049	FBgn0033698	CG8858	CG8858	0	EXON	-	biological_process ; GO:0008150 | no biological data available	cytoplasm ; GO:0005737 | inferred from sequence or structural similarity with UniProtKB:P38737 <newline> nucleus ; GO:0005634 | inferred from sequence or structural similarity with UniProtKB:P38737 <newline> proteasome complex ; GO:0000502 | inferred from sequence or structural similarity with UniProtKB:P38737	molecular_function ; GO:0003674 | no biological data available	Hsap\ENSG00000136813
ACCORD_I	2R_8080313_SNP	N	2.98e-07	0.049	FBgn0033697	Cyp6t3	Cyp6t3	372	3PRIME	+	oxidation-reduction process ; GO:0055114 | inferred from electronic annotation with InterPro:IPR001128, InterPro:IPR002401, InterPro:IPR017972 <newline> regulation of developmental growth ; GO:0048638 | inferred from mutant phenotype <newline> ecdysone biosynthetic process ; GO:0006697 | inferred from mutant phenotype	membrane ; GO:0016020 | non-traceable author statement <newline> intracellular membrane-bounded organelle ; GO:0043231 | non-traceable author statement	electron carrier activity ; GO:0009055 | non-traceable author statement <newline> electron carrier activity ; GO:0009055 | inferred from sequence or structural similarity <newline> oxidoreductase activity, acting on paired donors, with incorporation or reduction of molecular oxygen ; GO:0016705 | inferred from electronic annotation with InterPro:IPR001128, InterPro:IPR002401, InterPro:IPR017972 <…	-
ACCORD_I	2R_8080313_SNP	N	2.98e-07	0.049	FBgn0033698	CG8858	CG8858	0	EXON	-	biological_process ; GO:0008150 | no biological data available	cytoplasm ; GO:0005737 | inferred from sequence or structural similarity with UniProtKB:P38737 <newline> nucleus ; GO:0005634 | inferred from sequence or structural similarity with UniProtKB:P38737 <newline> proteasome complex ; GO:0000502 | inferred from sequence or structural similarity with UniProtKB:P38737	molecular_function ; GO:0003674 | no biological data available	Hsap\ENSG00000136813
ACCORD_I	2R_8080366_SNP	N	1.59e-06	0.049	FBgn0033697	Cyp6t3	Cyp6t3	425	3PRIME	+	oxidation-reduction process ; GO:0055114 | inferred from electronic annotation with InterPro:IPR001128, InterPro:IPR002401, InterPro:IPR017972 <newline> regulation of developmental growth ; GO:0048638 | inferred from mutant phenotype <newline> ecdysone biosynthetic process ; GO:0006697 | inferred from mutant phenotype	membrane ; GO:0016020 | non-traceable author statement <newline> intracellular membrane-bounded organelle ; GO:0043231 | non-traceable author statement	electron carrier activity ; GO:0009055 | non-traceable author statement <newline> electron carrier activity ; GO:0009055 | inferred from sequence or structural similarity <newline> oxidoreductase activity, acting on paired donors, with incorporation or reduction of molecular oxygen ; GO:0016705 | inferred from electronic annotation with InterPro:IPR001128, InterPro:IPR002401, InterPro:IPR017972 <…	-
ACCORD_I	2R_8080366_SNP	N	1.59e-06	0.049	FBgn0033698	CG8858	CG8858	0	EXON	-	biological_process ; GO:0008150 | no biological data available	cytoplasm ; GO:0005737 | inferred from sequence or structural similarity with UniProtKB:P38737 <newline> nucleus ; GO:0005634 | inferred from sequence or structural similarity with UniProtKB:P38737 <newline> proteasome complex ; GO:0000502 | inferred from sequence or structural similarity with UniProtKB:P38737	molecular_function ; GO:0003674 | no biological data available	Hsap\ENSG00000136813
ACCORD_I	2R_8080483_SNP	N	5.04e-07	0.049	FBgn0033697	Cyp6t3	Cyp6t3	542	3PRIME	+	oxidation-reduction process ; GO:0055114 | inferred from electronic annotation with InterPro:IPR001128, InterPro:IPR002401, InterPro:IPR017972 <newline> regulation of developmental growth ; GO:0048638 | inferred from mutant phenotype <newline> ecdysone biosynthetic process ; GO:0006697 | inferred from mutant phenotype	membrane ; GO:0016020 | non-traceable author statement <newline> intracellular membrane-bounded organelle ; GO:0043231 | non-traceable author statement	electron carrier activity ; GO:0009055 | non-traceable author statement <newline> electron carrier activity ; GO:0009055 | inferred from sequence or structural similarity <newline> oxidoreductase activity, acting on paired donors, with incorporation or reduction of molecular oxygen ; GO:0016705 | inferred from electronic annotation with InterPro:IPR001128, InterPro:IPR002401, InterPro:IPR017972 <…	-
ACCORD_I	2R_8080483_SNP	N	5.04e-07	0.049	FBgn0033698	CG8858	CG8858	0	EXON	-	biological_process ; GO:0008150 | no biological data available	cytoplasm ; GO:0005737 | inferred from sequence or structural similarity with UniProtKB:P38737 <newline> nucleus ; GO:0005634 | inferred from sequence or structural similarity with UniProtKB:P38737 <newline> proteasome complex ; GO:0000502 | inferred from sequence or structural similarity with UniProtKB:P38737	molecular_function ; GO:0003674 | no biological data available	Hsap\ENSG00000136813
ACCORD_I	2R_8080809_SNP	N	7.83e-10	0.049	FBgn0033697	Cyp6t3	Cyp6t3	868	3PRIME	+	oxidation-reduction process ; GO:0055114 | inferred from electronic annotation with InterPro:IPR001128, InterPro:IPR002401, InterPro:IPR017972 <newline> regulation of developmental growth ; GO:0048638 | inferred from mutant phenotype <newline> ecdysone biosynthetic process ; GO:0006697 | inferred from mutant phenotype	membrane ; GO:0016020 | non-traceable author statement <newline> intracellular membrane-bounded organelle ; GO:0043231 | non-traceable author statement	electron carrier activity ; GO:0009055 | non-traceable author statement <newline> electron carrier activity ; GO:0009055 | inferred from sequence or structural similarity <newline> oxidoreductase activity, acting on paired donors, with incorporation or reduction of molecular oxygen ; GO:0016705 | inferred from electronic annotation with InterPro:IPR001128, InterPro:IPR002401, InterPro:IPR017972 <…	-
ACCORD_I	2R_8080809_SNP	N	7.83e-10	0.049	FBgn0033698	CG8858	CG8858	0	EXON	-	biological_process ; GO:0008150 | no biological data available	cytoplasm ; GO:0005737 | inferred from sequence or structural similarity with UniProtKB:P38737 <newline> nucleus ; GO:0005634 | inferred from sequence or structural similarity with UniProtKB:P38737 <newline> proteasome complex ; GO:0000502 | inferred from sequence or structural similarity with UniProtKB:P38737	molecular_function ; GO:0003674 | no biological data available	Hsap\ENSG00000136813
ACCORD_I	2R_8081341_SNP	N	1.44e-07	0.049	FBgn0033698	CG8858	CG8858	0	EXON	-	biological_process ; GO:0008150 | no biological data available	cytoplasm ; GO:0005737 | inferred from sequence or structural similarity with UniProtKB:P38737 <newline> nucleus ; GO:0005634 | inferred from sequence or structural similarity with UniProtKB:P38737 <newline> proteasome complex ; GO:0000502 | inferred from sequence or structural similarity with UniProtKB:P38737	molecular_function ; GO:0003674 | no biological data available	Hsap\ENSG00000136813
ACCORD_I	2R_8081404_SNP	N	3.69e-09	0.049	FBgn0033698	CG8858	CG8858	0	EXON	-	biological_process ; GO:0008150 | no biological data available	cytoplasm ; GO:0005737 | inferred from sequence or structural similarity with UniProtKB:P38737 <newline> nucleus ; GO:0005634 | inferred from sequence or structural similarity with UniProtKB:P38737 <newline> proteasome complex ; GO:0000502 | inferred from sequence or structural similarity with UniProtKB:P38737	molecular_function ; GO:0003674 | no biological data available	Hsap\ENSG00000136813
ACCORD_I	2R_8081504_SNP	N	3.95e-08	0.049	FBgn0033698	CG8858	CG8858	0	EXON	-	biological_process ; GO:0008150 | no biological data available	cytoplasm ; GO:0005737 | inferred from sequence or structural similarity with UniProtKB:P38737 <newline> nucleus ; GO:0005634 | inferred from sequence or structural similarity with UniProtKB:P38737 <newline> proteasome complex ; GO:0000502 | inferred from sequence or structural similarity with UniProtKB:P38737	molecular_function ; GO:0003674 | no biological data available	Hsap\ENSG00000136813
ACCORD_I	2R_8082037_SNP	N	3.17e-08	0.049	FBgn0033698	CG8858	CG8858	0	EXON	-	biological_process ; GO:0008150 | no biological data available	cytoplasm ; GO:0005737 | inferred from sequence or structural similarity with UniProtKB:P38737 <newline> nucleus ; GO:0005634 | inferred from sequence or structural similarity with UniProtKB:P38737 <newline> proteasome complex ; GO:0000502 | inferred from sequence or structural similarity with UniProtKB:P38737	molecular_function ; GO:0003674 | no biological data available	Hsap\ENSG00000136813
ACCORD_I	2R_8082361_SNP	N	1.42e-07	0.049	FBgn0033698	CG8858	CG8858	0	EXON	-	biological_process ; GO:0008150 | no biological data available	cytoplasm ; GO:0005737 | inferred from sequence or structural similarity with UniProtKB:P38737 <newline> nucleus ; GO:0005634 | inferred from sequence or structural similarity with UniProtKB:P38737 <newline> proteasome complex ; GO:0000502 | inferred from sequence or structural similarity with UniProtKB:P38737	molecular_function ; GO:0003674 | no biological data available	Hsap\ENSG00000136813
ACCORD_I	2R_8082430_SNP	N	1.46e-07	0.049	FBgn0033698	CG8858	CG8858	0	EXON	-	biological_process ; GO:0008150 | no biological data available	cytoplasm ; GO:0005737 | inferred from sequence or structural similarity with UniProtKB:P38737 <newline> nucleus ; GO:0005634 | inferred from sequence or structural similarity with UniProtKB:P38737 <newline> proteasome complex ; GO:0000502 | inferred from sequence or structural similarity with UniProtKB:P38737	molecular_function ; GO:0003674 | no biological data available	Hsap\ENSG00000136813
ACCORD_I	2R_8082493_SNP	N	3.18e-10	0.049	FBgn0033698	CG8858	CG8858	0	EXON	-	biological_process ; GO:0008150 | no biological data available	cytoplasm ; GO:0005737 | inferred from sequence or structural similarity with UniProtKB:P38737 <newline> nucleus ; GO:0005634 | inferred from sequence or structural similarity with UniProtKB:P38737 <newline> proteasome complex ; GO:0000502 | inferred from sequence or structural similarity with UniProtKB:P38737	molecular_function ; GO:0003674 | no biological data available	Hsap\ENSG00000136813
ACCORD_I	2R_8082622_SNP	N	7.98e-09	0.049	FBgn0033698	CG8858	CG8858	0	EXON	-	biological_process ; GO:0008150 | no biological data available	cytoplasm ; GO:0005737 | inferred from sequence or structural similarity with UniProtKB:P38737 <newline> nucleus ; GO:0005634 | inferred from sequence or structural similarity with UniProtKB:P38737 <newline> proteasome complex ; GO:0000502 | inferred from sequence or structural similarity with UniProtKB:P38737	molecular_function ; GO:0003674 | no biological data available	Hsap\ENSG00000136813
ACCORD_I	2R_8083079_SNP	N	8.78e-10	0.049	FBgn0033698	CG8858	CG8858	0	EXON	-	biological_process ; GO:0008150 | no biological data available	cytoplasm ; GO:0005737 | inferred from sequence or structural similarity with UniProtKB:P38737 <newline> nucleus ; GO:0005634 | inferred from sequence or structural similarity with UniProtKB:P38737 <newline> proteasome complex ; GO:0000502 | inferred from sequence or structural similarity with UniProtKB:P38737	molecular_function ; GO:0003674 | no biological data available	Hsap\ENSG00000136813
ACCORD_I	2R_8083281_SNP	N	7.16e-08	0.049	FBgn0033698	CG8858	CG8858	0	EXON	-	biological_process ; GO:0008150 | no biological data available	cytoplasm ; GO:0005737 | inferred from sequence or structural similarity with UniProtKB:P38737 <newline> nucleus ; GO:0005634 | inferred from sequence or structural similarity with UniProtKB:P38737 <newline> proteasome complex ; GO:0000502 | inferred from sequence or structural similarity with UniProtKB:P38737	molecular_function ; GO:0003674 | no biological data available	Hsap\ENSG00000136813
ACCORD_I	2R_8083335_SNP	N	7.5e-10	0.049	FBgn0033698	CG8858	CG8858	0	EXON	-	biological_process ; GO:0008150 | no biological data available	cytoplasm ; GO:0005737 | inferred from sequence or structural similarity with UniProtKB:P38737 <newline> nucleus ; GO:0005634 | inferred from sequence or structural similarity with UniProtKB:P38737 <newline> proteasome complex ; GO:0000502 | inferred from sequence or structural similarity with UniProtKB:P38737	molecular_function ; GO:0003674 | no biological data available	Hsap\ENSG00000136813
ACCORD_I	2R_8083350_SNP	N	1.95e-09	0.049	FBgn0033698	CG8858	CG8858	0	EXON	-	biological_process ; GO:0008150 | no biological data available	cytoplasm ; GO:0005737 | inferred from sequence or structural similarity with UniProtKB:P38737 <newline> nucleus ; GO:0005634 | inferred from sequence or structural similarity with UniProtKB:P38737 <newline> proteasome complex ; GO:0000502 | inferred from sequence or structural similarity with UniProtKB:P38737	molecular_function ; GO:0003674 | no biological data available	Hsap\ENSG00000136813
ACCORD_I	2R_8083365_SNP	N	1.95e-09	0.049	FBgn0033698	CG8858	CG8858	0	EXON	-	biological_process ; GO:0008150 | no biological data available	cytoplasm ; GO:0005737 | inferred from sequence or structural similarity with UniProtKB:P38737 <newline> nucleus ; GO:0005634 | inferred from sequence or structural similarity with UniProtKB:P38737 <newline> proteasome complex ; GO:0000502 | inferred from sequence or structural similarity with UniProtKB:P38737	molecular_function ; GO:0003674 | no biological data available	Hsap\ENSG00000136813
ACCORD_I	2R_8083703_SNP	N	1.97e-07	0.049	FBgn0033698	CG8858	CG8858	0	EXON	-	biological_process ; GO:0008150 | no biological data available	cytoplasm ; GO:0005737 | inferred from sequence or structural similarity with UniProtKB:P38737 <newline> nucleus ; GO:0005634 | inferred from sequence or structural similarity with UniProtKB:P38737 <newline> proteasome complex ; GO:0000502 | inferred from sequence or structural similarity with UniProtKB:P38737	molecular_function ; GO:0003674 | no biological data available	Hsap\ENSG00000136813
ACCORD_I	2R_8083726_SNP	N	2.28e-10	0.049	FBgn0033698	CG8858	CG8858	0	EXON	-	biological_process ; GO:0008150 | no biological data available	cytoplasm ; GO:0005737 | inferred from sequence or structural similarity with UniProtKB:P38737 <newline> nucleus ; GO:0005634 | inferred from sequence or structural similarity with UniProtKB:P38737 <newline> proteasome complex ; GO:0000502 | inferred from sequence or structural similarity with UniProtKB:P38737	molecular_function ; GO:0003674 | no biological data available	Hsap\ENSG00000136813
ACCORD_I	2R_8084431_SNP	N	1.54e-08	0.049	FBgn0033698	CG8858	CG8858	0	EXON	-	biological_process ; GO:0008150 | no biological data available	cytoplasm ; GO:0005737 | inferred from sequence or structural similarity with UniProtKB:P38737 <newline> nucleus ; GO:0005634 | inferred from sequence or structural similarity with UniProtKB:P38737 <newline> proteasome complex ; GO:0000502 | inferred from sequence or structural similarity with UniProtKB:P38737	molecular_function ; GO:0003674 | no biological data available	Hsap\ENSG00000136813
ACCORD_I	2R_8084472_SNP	N	4.22e-07	0.049	FBgn0033698	CG8858	CG8858	0	INTRON	-	biological_process ; GO:0008150 | no biological data available	cytoplasm ; GO:0005737 | inferred from sequence or structural similarity with UniProtKB:P38737 <newline> nucleus ; GO:0005634 | inferred from sequence or structural similarity with UniProtKB:P38737 <newline> proteasome complex ; GO:0000502 | inferred from sequence or structural similarity with UniProtKB:P38737	molecular_function ; GO:0003674 | no biological data available	Hsap\ENSG00000136813
ACCORD_I	2R_8084501_SNP	N	4.67e-09	0.049	FBgn0033698	CG8858	CG8858	0	INTRON	-	biological_process ; GO:0008150 | no biological data available	cytoplasm ; GO:0005737 | inferred from sequence or structural similarity with UniProtKB:P38737 <newline> nucleus ; GO:0005634 | inferred from sequence or structural similarity with UniProtKB:P38737 <newline> proteasome complex ; GO:0000502 | inferred from sequence or structural similarity with UniProtKB:P38737	molecular_function ; GO:0003674 | no biological data available	Hsap\ENSG00000136813
ACCORD_I	2R_8084504_SNP	N	4.32e-07	0.049	FBgn0033698	CG8858	CG8858	0	INTRON	-	biological_process ; GO:0008150 | no biological data available	cytoplasm ; GO:0005737 | inferred from sequence or structural similarity with UniProtKB:P38737 <newline> nucleus ; GO:0005634 | inferred from sequence or structural similarity with UniProtKB:P38737 <newline> proteasome complex ; GO:0000502 | inferred from sequence or structural similarity with UniProtKB:P38737	molecular_function ; GO:0003674 | no biological data available	Hsap\ENSG00000136813
ACCORD_I	2R_8084506_SNP	N	4.8e-08	0.049	FBgn0033698	CG8858	CG8858	0	INTRON	-	biological_process ; GO:0008150 | no biological data available	cytoplasm ; GO:0005737 | inferred from sequence or structural similarity with UniProtKB:P38737 <newline> nucleus ; GO:0005634 | inferred from sequence or structural similarity with UniProtKB:P38737 <newline> proteasome complex ; GO:0000502 | inferred from sequence or structural similarity with UniProtKB:P38737	molecular_function ; GO:0003674 | no biological data available	Hsap\ENSG00000136813
ACCORD_I	2R_8084529_SNP	N	5.27e-09	0.049	FBgn0033698	CG8858	CG8858	0	EXON	-	biological_process ; GO:0008150 | no biological data available	cytoplasm ; GO:0005737 | inferred from sequence or structural similarity with UniProtKB:P38737 <newline> nucleus ; GO:0005634 | inferred from sequence or structural similarity with UniProtKB:P38737 <newline> proteasome complex ; GO:0000502 | inferred from sequence or structural similarity with UniProtKB:P38737	molecular_function ; GO:0003674 | no biological data available	Hsap\ENSG00000136813
ACCORD_I	2R_8084634_SNP	N	1.44e-08	0.049	FBgn0033698	CG8858	CG8858	0	EXON	-	biological_process ; GO:0008150 | no biological data available	cytoplasm ; GO:0005737 | inferred from sequence or structural similarity with UniProtKB:P38737 <newline> nucleus ; GO:0005634 | inferred from sequence or structural similarity with UniProtKB:P38737 <newline> proteasome complex ; GO:0000502 | inferred from sequence or structural similarity with UniProtKB:P38737	molecular_function ; GO:0003674 | no biological data available	Hsap\ENSG00000136813
ACCORD_I	2R_8084832_SNP	N	2.2e-09	0.049	FBgn0033698	CG8858	CG8858	0	EXON	-	biological_process ; GO:0008150 | no biological data available	cytoplasm ; GO:0005737 | inferred from sequence or structural similarity with UniProtKB:P38737 <newline> nucleus ; GO:0005634 | inferred from sequence or structural similarity with UniProtKB:P38737 <newline> proteasome complex ; GO:0000502 | inferred from sequence or structural similarity with UniProtKB:P38737	molecular_function ; GO:0003674 | no biological data available	Hsap\ENSG00000136813
ACCORD_I	2R_8084916_SNP	N	4.92e-08	0.049	FBgn0033698	CG8858	CG8858	0	EXON	-	biological_process ; GO:0008150 | no biological data available	cytoplasm ; GO:0005737 | inferred from sequence or structural similarity with UniProtKB:P38737 <newline> nucleus ; GO:0005634 | inferred from sequence or structural similarity with UniProtKB:P38737 <newline> proteasome complex ; GO:0000502 | inferred from sequence or structural similarity with UniProtKB:P38737	molecular_function ; GO:0003674 | no biological data available	Hsap\ENSG00000136813
ACCORD_I	2R_8084922_SNP	N	9.6e-09	0.049	FBgn0033698	CG8858	CG8858	0	EXON	-	biological_process ; GO:0008150 | no biological data available	cytoplasm ; GO:0005737 | inferred from sequence or structural similarity with UniProtKB:P38737 <newline> nucleus ; GO:0005634 | inferred from sequence or structural similarity with UniProtKB:P38737 <newline> proteasome complex ; GO:0000502 | inferred from sequence or structural similarity with UniProtKB:P38737	molecular_function ; GO:0003674 | no biological data available	Hsap\ENSG00000136813
ACCORD_I	2R_8084943_SNP	N	4.58e-08	0.049	FBgn0033698	CG8858	CG8858	0	EXON	-	biological_process ; GO:0008150 | no biological data available	cytoplasm ; GO:0005737 | inferred from sequence or structural similarity with UniProtKB:P38737 <newline> nucleus ; GO:0005634 | inferred from sequence or structural similarity with UniProtKB:P38737 <newline> proteasome complex ; GO:0000502 | inferred from sequence or structural similarity with UniProtKB:P38737	molecular_function ; GO:0003674 | no biological data available	Hsap\ENSG00000136813
ACCORD_I	2R_8085097_SNP	N	6.05e-10	0.049	FBgn0033698	CG8858	CG8858	0	EXON	-	biological_process ; GO:0008150 | no biological data available	cytoplasm ; GO:0005737 | inferred from sequence or structural similarity with UniProtKB:P38737 <newline> nucleus ; GO:0005634 | inferred from sequence or structural similarity with UniProtKB:P38737 <newline> proteasome complex ; GO:0000502 | inferred from sequence or structural similarity with UniProtKB:P38737	molecular_function ; GO:0003674 | no biological data available	Hsap\ENSG00000136813
ACCORD_I	2R_8085156_SNP	N	1.34e-09	0.049	FBgn0033698	CG8858	CG8858	0	EXON	-	biological_process ; GO:0008150 | no biological data available	cytoplasm ; GO:0005737 | inferred from sequence or structural similarity with UniProtKB:P38737 <newline> nucleus ; GO:0005634 | inferred from sequence or structural similarity with UniProtKB:P38737 <newline> proteasome complex ; GO:0000502 | inferred from sequence or structural similarity with UniProtKB:P38737	molecular_function ; GO:0003674 | no biological data available	Hsap\ENSG00000136813
ACCORD_I	2R_8085184_SNP	N	7.73e-09	0.049	FBgn0033698	CG8858	CG8858	0	EXON	-	biological_process ; GO:0008150 | no biological data available	cytoplasm ; GO:0005737 | inferred from sequence or structural similarity with UniProtKB:P38737 <newline> nucleus ; GO:0005634 | inferred from sequence or structural similarity with UniProtKB:P38737 <newline> proteasome complex ; GO:0000502 | inferred from sequence or structural similarity with UniProtKB:P38737	molecular_function ; GO:0003674 | no biological data available	Hsap\ENSG00000136813
ACCORD_I	2R_8086269_SNP	N	1.02e-06	0.049	FBgn0033698	CG8858	CG8858	0	INTRON	-	biological_process ; GO:0008150 | no biological data available	cytoplasm ; GO:0005737 | inferred from sequence or structural similarity with UniProtKB:P38737 <newline> nucleus ; GO:0005634 | inferred from sequence or structural similarity with UniProtKB:P38737 <newline> proteasome complex ; GO:0000502 | inferred from sequence or structural similarity with UniProtKB:P38737	molecular_function ; GO:0003674 | no biological data available	Hsap\ENSG00000136813
ACCORD_I	2R_8086269_SNP	N	1.02e-06	0.049	FBgn0033699	RpS11	Ribosomal protein S11	260	3PRIME	-	translation ; GO:0006412 | inferred from sequence or structural similarity <newline> translation ; GO:0006412 | inferred from sequence or structural similarity with NCBI_gi:4506681 <newline> mitotic spindle elongation ; GO:0000022 | inferred from mutant phenotype <newline> mitotic spindle organization ; GO:0007052 | inferred from mutant phenotype <newline> neurogenesis ; GO:0022008 | inferred fro…	cytosolic small ribosomal subunit ; GO:0022627 | inferred from sequence or structural similarity <newline> cytosolic small ribosomal subunit ; GO:0022627 | inferred from sequence or structural similarity with NCBI_gi:4506681 <newline> nucleolus ; GO:0005730 | inferred from direct assay <newline> cytoplasm ; GO:0005737 | inferred from direct assay <newline> nuclear chromosome ; GO:0000228 | inferr…	structural constituent of ribosome ; GO:0003735 | inferred from sequence or structural similarity <newline> structural constituent of ribosome ; GO:0003735 | inferred from sequence or structural similarity with NCBI_gi:4506681	Hsap\RPS11
ACCORD_I	2R_8086269_SNP	N	1.02e-06	0.049	FBgn0083988	snoRNA:Me28S-C3420a	snoRNA:Me28S-C3420a	898	3PRIME	-	-	-	-	-
ACCORD_I	2R_8086269_SNP	N	1.02e-06	0.049	FBgn0083989	snoRNA:Me28S-C3420b	snoRNA:Me28S-C3420b	419	3PRIME	-	-	-	-	-
ACCORD_I	2R_8086475_INS	N	3.68e-07	0.049	FBgn0033698	CG8858	CG8858	116	5PRIME	-	biological_process ; GO:0008150 | no biological data available	cytoplasm ; GO:0005737 | inferred from sequence or structural similarity with UniProtKB:P38737 <newline> nucleus ; GO:0005634 | inferred from sequence or structural similarity with UniProtKB:P38737 <newline> proteasome complex ; GO:0000502 | inferred from sequence or structural similarity with UniProtKB:P38737	molecular_function ; GO:0003674 | no biological data available	Hsap\ENSG00000136813
ACCORD_I	2R_8086475_INS	N	3.68e-07	0.049	FBgn0033699	RpS11	Ribosomal protein S11	54	3PRIME	-	translation ; GO:0006412 | inferred from sequence or structural similarity <newline> translation ; GO:0006412 | inferred from sequence or structural similarity with NCBI_gi:4506681 <newline> mitotic spindle elongation ; GO:0000022 | inferred from mutant phenotype <newline> mitotic spindle organization ; GO:0007052 | inferred from mutant phenotype <newline> neurogenesis ; GO:0022008 | inferred fro…	cytosolic small ribosomal subunit ; GO:0022627 | inferred from sequence or structural similarity <newline> cytosolic small ribosomal subunit ; GO:0022627 | inferred from sequence or structural similarity with NCBI_gi:4506681 <newline> nucleolus ; GO:0005730 | inferred from direct assay <newline> cytoplasm ; GO:0005737 | inferred from direct assay <newline> nuclear chromosome ; GO:0000228 | inferr…	structural constituent of ribosome ; GO:0003735 | inferred from sequence or structural similarity <newline> structural constituent of ribosome ; GO:0003735 | inferred from sequence or structural similarity with NCBI_gi:4506681	Hsap\RPS11
ACCORD_I	2R_8086475_INS	N	3.68e-07	0.049	FBgn0083988	snoRNA:Me28S-C3420a	snoRNA:Me28S-C3420a	692	3PRIME	-	-	-	-	-
ACCORD_I	2R_8086475_INS	N	3.68e-07	0.049	FBgn0083989	snoRNA:Me28S-C3420b	snoRNA:Me28S-C3420b	213	3PRIME	-	-	-	-	-
ACCORD_I	2R_8086673_SNP	N	6.65e-09	0.049	FBgn0033698	CG8858	CG8858	314	5PRIME	-	biological_process ; GO:0008150 | no biological data available	cytoplasm ; GO:0005737 | inferred from sequence or structural similarity with UniProtKB:P38737 <newline> nucleus ; GO:0005634 | inferred from sequence or structural similarity with UniProtKB:P38737 <newline> proteasome complex ; GO:0000502 | inferred from sequence or structural similarity with UniProtKB:P38737	molecular_function ; GO:0003674 | no biological data available	Hsap\ENSG00000136813
ACCORD_I	2R_8086673_SNP	N	6.65e-09	0.049	FBgn0033699	RpS11	Ribosomal protein S11	0	INTRON	-	translation ; GO:0006412 | inferred from sequence or structural similarity <newline> translation ; GO:0006412 | inferred from sequence or structural similarity with NCBI_gi:4506681 <newline> mitotic spindle elongation ; GO:0000022 | inferred from mutant phenotype <newline> mitotic spindle organization ; GO:0007052 | inferred from mutant phenotype <newline> neurogenesis ; GO:0022008 | inferred fro…	cytosolic small ribosomal subunit ; GO:0022627 | inferred from sequence or structural similarity <newline> cytosolic small ribosomal subunit ; GO:0022627 | inferred from sequence or structural similarity with NCBI_gi:4506681 <newline> nucleolus ; GO:0005730 | inferred from direct assay <newline> cytoplasm ; GO:0005737 | inferred from direct assay <newline> nuclear chromosome ; GO:0000228 | inferr…	structural constituent of ribosome ; GO:0003735 | inferred from sequence or structural similarity <newline> structural constituent of ribosome ; GO:0003735 | inferred from sequence or structural similarity with NCBI_gi:4506681	Hsap\RPS11
ACCORD_I	2R_8086673_SNP	N	6.65e-09	0.049	FBgn0083988	snoRNA:Me28S-C3420a	snoRNA:Me28S-C3420a	494	3PRIME	-	-	-	-	-
ACCORD_I	2R_8086673_SNP	N	6.65e-09	0.049	FBgn0083989	snoRNA:Me28S-C3420b	snoRNA:Me28S-C3420b	15	3PRIME	-	-	-	-	-
ACCORD_I	2R_8086807_SNP	N	2.67e-07	0.049	FBgn0033698	CG8858	CG8858	448	5PRIME	-	biological_process ; GO:0008150 | no biological data available	cytoplasm ; GO:0005737 | inferred from sequence or structural similarity with UniProtKB:P38737 <newline> nucleus ; GO:0005634 | inferred from sequence or structural similarity with UniProtKB:P38737 <newline> proteasome complex ; GO:0000502 | inferred from sequence or structural similarity with UniProtKB:P38737	molecular_function ; GO:0003674 | no biological data available	Hsap\ENSG00000136813
ACCORD_I	2R_8086807_SNP	N	2.67e-07	0.049	FBgn0033699	RpS11	Ribosomal protein S11	0	INTRON	-	translation ; GO:0006412 | inferred from sequence or structural similarity <newline> translation ; GO:0006412 | inferred from sequence or structural similarity with NCBI_gi:4506681 <newline> mitotic spindle elongation ; GO:0000022 | inferred from mutant phenotype <newline> mitotic spindle organization ; GO:0007052 | inferred from mutant phenotype <newline> neurogenesis ; GO:0022008 | inferred fro…	cytosolic small ribosomal subunit ; GO:0022627 | inferred from sequence or structural similarity <newline> cytosolic small ribosomal subunit ; GO:0022627 | inferred from sequence or structural similarity with NCBI_gi:4506681 <newline> nucleolus ; GO:0005730 | inferred from direct assay <newline> cytoplasm ; GO:0005737 | inferred from direct assay <newline> nuclear chromosome ; GO:0000228 | inferr…	structural constituent of ribosome ; GO:0003735 | inferred from sequence or structural similarity <newline> structural constituent of ribosome ; GO:0003735 | inferred from sequence or structural similarity with NCBI_gi:4506681	Hsap\RPS11
ACCORD_I	2R_8086807_SNP	N	2.67e-07	0.049	FBgn0083988	snoRNA:Me28S-C3420a	snoRNA:Me28S-C3420a	360	3PRIME	-	-	-	-	-
ACCORD_I	2R_8086807_SNP	N	2.67e-07	0.049	FBgn0083989	snoRNA:Me28S-C3420b	snoRNA:Me28S-C3420b	29	5PRIME	-	-	-	-	-
ACCORD_I	2R_8086831_SNP	N	2.14e-07	0.049	FBgn0033698	CG8858	CG8858	472	5PRIME	-	biological_process ; GO:0008150 | no biological data available	cytoplasm ; GO:0005737 | inferred from sequence or structural similarity with UniProtKB:P38737 <newline> nucleus ; GO:0005634 | inferred from sequence or structural similarity with UniProtKB:P38737 <newline> proteasome complex ; GO:0000502 | inferred from sequence or structural similarity with UniProtKB:P38737	molecular_function ; GO:0003674 | no biological data available	Hsap\ENSG00000136813
ACCORD_I	2R_8086831_SNP	N	2.14e-07	0.049	FBgn0033699	RpS11	Ribosomal protein S11	0	EXON	-	translation ; GO:0006412 | inferred from sequence or structural similarity <newline> translation ; GO:0006412 | inferred from sequence or structural similarity with NCBI_gi:4506681 <newline> mitotic spindle elongation ; GO:0000022 | inferred from mutant phenotype <newline> mitotic spindle organization ; GO:0007052 | inferred from mutant phenotype <newline> neurogenesis ; GO:0022008 | inferred fro…	cytosolic small ribosomal subunit ; GO:0022627 | inferred from sequence or structural similarity <newline> cytosolic small ribosomal subunit ; GO:0022627 | inferred from sequence or structural similarity with NCBI_gi:4506681 <newline> nucleolus ; GO:0005730 | inferred from direct assay <newline> cytoplasm ; GO:0005737 | inferred from direct assay <newline> nuclear chromosome ; GO:0000228 | inferr…	structural constituent of ribosome ; GO:0003735 | inferred from sequence or structural similarity <newline> structural constituent of ribosome ; GO:0003735 | inferred from sequence or structural similarity with NCBI_gi:4506681	Hsap\RPS11
ACCORD_I	2R_8086831_SNP	N	2.14e-07	0.049	FBgn0083988	snoRNA:Me28S-C3420a	snoRNA:Me28S-C3420a	336	3PRIME	-	-	-	-	-
ACCORD_I	2R_8086831_SNP	N	2.14e-07	0.049	FBgn0083989	snoRNA:Me28S-C3420b	snoRNA:Me28S-C3420b	53	5PRIME	-	-	-	-	-
ACCORD_I	2R_8086875_DEL	N	2.96e-07	0.049	FBgn0033698	CG8858	CG8858	516	5PRIME	-	biological_process ; GO:0008150 | no biological data available	cytoplasm ; GO:0005737 | inferred from sequence or structural similarity with UniProtKB:P38737 <newline> nucleus ; GO:0005634 | inferred from sequence or structural similarity with UniProtKB:P38737 <newline> proteasome complex ; GO:0000502 | inferred from sequence or structural similarity with UniProtKB:P38737	molecular_function ; GO:0003674 | no biological data available	Hsap\ENSG00000136813
ACCORD_I	2R_8086875_DEL	N	2.96e-07	0.049	FBgn0033699	RpS11	Ribosomal protein S11	0	EXON	-	translation ; GO:0006412 | inferred from sequence or structural similarity <newline> translation ; GO:0006412 | inferred from sequence or structural similarity with NCBI_gi:4506681 <newline> mitotic spindle elongation ; GO:0000022 | inferred from mutant phenotype <newline> mitotic spindle organization ; GO:0007052 | inferred from mutant phenotype <newline> neurogenesis ; GO:0022008 | inferred fro…	cytosolic small ribosomal subunit ; GO:0022627 | inferred from sequence or structural similarity <newline> cytosolic small ribosomal subunit ; GO:0022627 | inferred from sequence or structural similarity with NCBI_gi:4506681 <newline> nucleolus ; GO:0005730 | inferred from direct assay <newline> cytoplasm ; GO:0005737 | inferred from direct assay <newline> nuclear chromosome ; GO:0000228 | inferr…	structural constituent of ribosome ; GO:0003735 | inferred from sequence or structural similarity <newline> structural constituent of ribosome ; GO:0003735 | inferred from sequence or structural similarity with NCBI_gi:4506681	Hsap\RPS11
ACCORD_I	2R_8086875_DEL	N	2.96e-07	0.049	FBgn0083988	snoRNA:Me28S-C3420a	snoRNA:Me28S-C3420a	292	3PRIME	-	-	-	-	-
ACCORD_I	2R_8086875_DEL	N	2.96e-07	0.049	FBgn0083989	snoRNA:Me28S-C3420b	snoRNA:Me28S-C3420b	97	5PRIME	-	-	-	-	-
ACCORD_I	2R_8086891_SNP	N	2.38e-07	0.049	FBgn0033698	CG8858	CG8858	532	5PRIME	-	biological_process ; GO:0008150 | no biological data available	cytoplasm ; GO:0005737 | inferred from sequence or structural similarity with UniProtKB:P38737 <newline> nucleus ; GO:0005634 | inferred from sequence or structural similarity with UniProtKB:P38737 <newline> proteasome complex ; GO:0000502 | inferred from sequence or structural similarity with UniProtKB:P38737	molecular_function ; GO:0003674 | no biological data available	Hsap\ENSG00000136813
ACCORD_I	2R_8086891_SNP	N	2.38e-07	0.049	FBgn0033699	RpS11	Ribosomal protein S11	0	EXON	-	translation ; GO:0006412 | inferred from sequence or structural similarity <newline> translation ; GO:0006412 | inferred from sequence or structural similarity with NCBI_gi:4506681 <newline> mitotic spindle elongation ; GO:0000022 | inferred from mutant phenotype <newline> mitotic spindle organization ; GO:0007052 | inferred from mutant phenotype <newline> neurogenesis ; GO:0022008 | inferred fro…	cytosolic small ribosomal subunit ; GO:0022627 | inferred from sequence or structural similarity <newline> cytosolic small ribosomal subunit ; GO:0022627 | inferred from sequence or structural similarity with NCBI_gi:4506681 <newline> nucleolus ; GO:0005730 | inferred from direct assay <newline> cytoplasm ; GO:0005737 | inferred from direct assay <newline> nuclear chromosome ; GO:0000228 | inferr…	structural constituent of ribosome ; GO:0003735 | inferred from sequence or structural similarity <newline> structural constituent of ribosome ; GO:0003735 | inferred from sequence or structural similarity with NCBI_gi:4506681	Hsap\RPS11
ACCORD_I	2R_8086891_SNP	N	2.38e-07	0.049	FBgn0083988	snoRNA:Me28S-C3420a	snoRNA:Me28S-C3420a	276	3PRIME	-	-	-	-	-
ACCORD_I	2R_8086891_SNP	N	2.38e-07	0.049	FBgn0083989	snoRNA:Me28S-C3420b	snoRNA:Me28S-C3420b	113	5PRIME	-	-	-	-	-
ACCORD_I	2R_8087114_SNP	N	3.18e-10	0.049	FBgn0033698	CG8858	CG8858	755	5PRIME	-	biological_process ; GO:0008150 | no biological data available	cytoplasm ; GO:0005737 | inferred from sequence or structural similarity with UniProtKB:P38737 <newline> nucleus ; GO:0005634 | inferred from sequence or structural similarity with UniProtKB:P38737 <newline> proteasome complex ; GO:0000502 | inferred from sequence or structural similarity with UniProtKB:P38737	molecular_function ; GO:0003674 | no biological data available	Hsap\ENSG00000136813
ACCORD_I	2R_8087114_SNP	N	3.18e-10	0.049	FBgn0033699	RpS11	Ribosomal protein S11	0	INTRON	-	translation ; GO:0006412 | inferred from sequence or structural similarity <newline> translation ; GO:0006412 | inferred from sequence or structural similarity with NCBI_gi:4506681 <newline> mitotic spindle elongation ; GO:0000022 | inferred from mutant phenotype <newline> mitotic spindle organization ; GO:0007052 | inferred from mutant phenotype <newline> neurogenesis ; GO:0022008 | inferred fro…	cytosolic small ribosomal subunit ; GO:0022627 | inferred from sequence or structural similarity <newline> cytosolic small ribosomal subunit ; GO:0022627 | inferred from sequence or structural similarity with NCBI_gi:4506681 <newline> nucleolus ; GO:0005730 | inferred from direct assay <newline> cytoplasm ; GO:0005737 | inferred from direct assay <newline> nuclear chromosome ; GO:0000228 | inferr…	structural constituent of ribosome ; GO:0003735 | inferred from sequence or structural similarity <newline> structural constituent of ribosome ; GO:0003735 | inferred from sequence or structural similarity with NCBI_gi:4506681	Hsap\RPS11
ACCORD_I	2R_8087114_SNP	N	3.18e-10	0.049	FBgn0083988	snoRNA:Me28S-C3420a	snoRNA:Me28S-C3420a	53	3PRIME	-	-	-	-	-
ACCORD_I	2R_8087114_SNP	N	3.18e-10	0.049	FBgn0083989	snoRNA:Me28S-C3420b	snoRNA:Me28S-C3420b	336	5PRIME	-	-	-	-	-
ACCORD_I	2R_8087280_SNP	N	1.43e-07	0.049	FBgn0033698	CG8858	CG8858	921	5PRIME	-	biological_process ; GO:0008150 | no biological data available	cytoplasm ; GO:0005737 | inferred from sequence or structural similarity with UniProtKB:P38737 <newline> nucleus ; GO:0005634 | inferred from sequence or structural similarity with UniProtKB:P38737 <newline> proteasome complex ; GO:0000502 | inferred from sequence or structural similarity with UniProtKB:P38737	molecular_function ; GO:0003674 | no biological data available	Hsap\ENSG00000136813
ACCORD_I	2R_8087280_SNP	N	1.43e-07	0.049	FBgn0033699	RpS11	Ribosomal protein S11	0	INTRON	-	translation ; GO:0006412 | inferred from sequence or structural similarity <newline> translation ; GO:0006412 | inferred from sequence or structural similarity with NCBI_gi:4506681 <newline> mitotic spindle elongation ; GO:0000022 | inferred from mutant phenotype <newline> mitotic spindle organization ; GO:0007052 | inferred from mutant phenotype <newline> neurogenesis ; GO:0022008 | inferred fro…	cytosolic small ribosomal subunit ; GO:0022627 | inferred from sequence or structural similarity <newline> cytosolic small ribosomal subunit ; GO:0022627 | inferred from sequence or structural similarity with NCBI_gi:4506681 <newline> nucleolus ; GO:0005730 | inferred from direct assay <newline> cytoplasm ; GO:0005737 | inferred from direct assay <newline> nuclear chromosome ; GO:0000228 | inferr…	structural constituent of ribosome ; GO:0003735 | inferred from sequence or structural similarity <newline> structural constituent of ribosome ; GO:0003735 | inferred from sequence or structural similarity with NCBI_gi:4506681	Hsap\RPS11
ACCORD_I	2R_8087280_SNP	N	1.43e-07	0.049	FBgn0083988	snoRNA:Me28S-C3420a	snoRNA:Me28S-C3420a	23	5PRIME	-	-	-	-	-
ACCORD_I	2R_8087280_SNP	N	1.43e-07	0.049	FBgn0083989	snoRNA:Me28S-C3420b	snoRNA:Me28S-C3420b	502	5PRIME	-	-	-	-	-
ACCORD_I	2R_8087287_INS	N	1.54e-07	0.049	FBgn0033698	CG8858	CG8858	928	5PRIME	-	biological_process ; GO:0008150 | no biological data available	cytoplasm ; GO:0005737 | inferred from sequence or structural similarity with UniProtKB:P38737 <newline> nucleus ; GO:0005634 | inferred from sequence or structural similarity with UniProtKB:P38737 <newline> proteasome complex ; GO:0000502 | inferred from sequence or structural similarity with UniProtKB:P38737	molecular_function ; GO:0003674 | no biological data available	Hsap\ENSG00000136813
ACCORD_I	2R_8087287_INS	N	1.54e-07	0.049	FBgn0033699	RpS11	Ribosomal protein S11	0	INTRON	-	translation ; GO:0006412 | inferred from sequence or structural similarity <newline> translation ; GO:0006412 | inferred from sequence or structural similarity with NCBI_gi:4506681 <newline> mitotic spindle elongation ; GO:0000022 | inferred from mutant phenotype <newline> mitotic spindle organization ; GO:0007052 | inferred from mutant phenotype <newline> neurogenesis ; GO:0022008 | inferred fro…	cytosolic small ribosomal subunit ; GO:0022627 | inferred from sequence or structural similarity <newline> cytosolic small ribosomal subunit ; GO:0022627 | inferred from sequence or structural similarity with NCBI_gi:4506681 <newline> nucleolus ; GO:0005730 | inferred from direct assay <newline> cytoplasm ; GO:0005737 | inferred from direct assay <newline> nuclear chromosome ; GO:0000228 | inferr…	structural constituent of ribosome ; GO:0003735 | inferred from sequence or structural similarity <newline> structural constituent of ribosome ; GO:0003735 | inferred from sequence or structural similarity with NCBI_gi:4506681	Hsap\RPS11
ACCORD_I	2R_8087287_INS	N	1.54e-07	0.049	FBgn0083988	snoRNA:Me28S-C3420a	snoRNA:Me28S-C3420a	30	5PRIME	-	-	-	-	-
ACCORD_I	2R_8087287_INS	N	1.54e-07	0.049	FBgn0083989	snoRNA:Me28S-C3420b	snoRNA:Me28S-C3420b	509	5PRIME	-	-	-	-	-
ACCORD_I	2R_8087300_SNP	N	2.09e-07	0.049	FBgn0033698	CG8858	CG8858	941	5PRIME	-	biological_process ; GO:0008150 | no biological data available	cytoplasm ; GO:0005737 | inferred from sequence or structural similarity with UniProtKB:P38737 <newline> nucleus ; GO:0005634 | inferred from sequence or structural similarity with UniProtKB:P38737 <newline> proteasome complex ; GO:0000502 | inferred from sequence or structural similarity with UniProtKB:P38737	molecular_function ; GO:0003674 | no biological data available	Hsap\ENSG00000136813
ACCORD_I	2R_8087300_SNP	N	2.09e-07	0.049	FBgn0033699	RpS11	Ribosomal protein S11	0	INTRON	-	translation ; GO:0006412 | inferred from sequence or structural similarity <newline> translation ; GO:0006412 | inferred from sequence or structural similarity with NCBI_gi:4506681 <newline> mitotic spindle elongation ; GO:0000022 | inferred from mutant phenotype <newline> mitotic spindle organization ; GO:0007052 | inferred from mutant phenotype <newline> neurogenesis ; GO:0022008 | inferred fro…	cytosolic small ribosomal subunit ; GO:0022627 | inferred from sequence or structural similarity <newline> cytosolic small ribosomal subunit ; GO:0022627 | inferred from sequence or structural similarity with NCBI_gi:4506681 <newline> nucleolus ; GO:0005730 | inferred from direct assay <newline> cytoplasm ; GO:0005737 | inferred from direct assay <newline> nuclear chromosome ; GO:0000228 | inferr…	structural constituent of ribosome ; GO:0003735 | inferred from sequence or structural similarity <newline> structural constituent of ribosome ; GO:0003735 | inferred from sequence or structural similarity with NCBI_gi:4506681	Hsap\RPS11
ACCORD_I	2R_8087300_SNP	N	2.09e-07	0.049	FBgn0083988	snoRNA:Me28S-C3420a	snoRNA:Me28S-C3420a	43	5PRIME	-	-	-	-	-
ACCORD_I	2R_8087300_SNP	N	2.09e-07	0.049	FBgn0083989	snoRNA:Me28S-C3420b	snoRNA:Me28S-C3420b	522	5PRIME	-	-	-	-	-
ACCORD_I	2R_8087306_SNP	N	5.11e-08	0.049	FBgn0033698	CG8858	CG8858	947	5PRIME	-	biological_process ; GO:0008150 | no biological data available	cytoplasm ; GO:0005737 | inferred from sequence or structural similarity with UniProtKB:P38737 <newline> nucleus ; GO:0005634 | inferred from sequence or structural similarity with UniProtKB:P38737 <newline> proteasome complex ; GO:0000502 | inferred from sequence or structural similarity with UniProtKB:P38737	molecular_function ; GO:0003674 | no biological data available	Hsap\ENSG00000136813
ACCORD_I	2R_8087306_SNP	N	5.11e-08	0.049	FBgn0033699	RpS11	Ribosomal protein S11	0	INTRON	-	translation ; GO:0006412 | inferred from sequence or structural similarity <newline> translation ; GO:0006412 | inferred from sequence or structural similarity with NCBI_gi:4506681 <newline> mitotic spindle elongation ; GO:0000022 | inferred from mutant phenotype <newline> mitotic spindle organization ; GO:0007052 | inferred from mutant phenotype <newline> neurogenesis ; GO:0022008 | inferred fro…	cytosolic small ribosomal subunit ; GO:0022627 | inferred from sequence or structural similarity <newline> cytosolic small ribosomal subunit ; GO:0022627 | inferred from sequence or structural similarity with NCBI_gi:4506681 <newline> nucleolus ; GO:0005730 | inferred from direct assay <newline> cytoplasm ; GO:0005737 | inferred from direct assay <newline> nuclear chromosome ; GO:0000228 | inferr…	structural constituent of ribosome ; GO:0003735 | inferred from sequence or structural similarity <newline> structural constituent of ribosome ; GO:0003735 | inferred from sequence or structural similarity with NCBI_gi:4506681	Hsap\RPS11
ACCORD_I	2R_8087306_SNP	N	5.11e-08	0.049	FBgn0083988	snoRNA:Me28S-C3420a	snoRNA:Me28S-C3420a	49	5PRIME	-	-	-	-	-
ACCORD_I	2R_8087306_SNP	N	5.11e-08	0.049	FBgn0083989	snoRNA:Me28S-C3420b	snoRNA:Me28S-C3420b	528	5PRIME	-	-	-	-	-
ACCORD_I	2R_8087309_SNP	N	4.74e-08	0.049	FBgn0033698	CG8858	CG8858	950	5PRIME	-	biological_process ; GO:0008150 | no biological data available	cytoplasm ; GO:0005737 | inferred from sequence or structural similarity with UniProtKB:P38737 <newline> nucleus ; GO:0005634 | inferred from sequence or structural similarity with UniProtKB:P38737 <newline> proteasome complex ; GO:0000502 | inferred from sequence or structural similarity with UniProtKB:P38737	molecular_function ; GO:0003674 | no biological data available	Hsap\ENSG00000136813
ACCORD_I	2R_8087309_SNP	N	4.74e-08	0.049	FBgn0033699	RpS11	Ribosomal protein S11	0	INTRON	-	translation ; GO:0006412 | inferred from sequence or structural similarity <newline> translation ; GO:0006412 | inferred from sequence or structural similarity with NCBI_gi:4506681 <newline> mitotic spindle elongation ; GO:0000022 | inferred from mutant phenotype <newline> mitotic spindle organization ; GO:0007052 | inferred from mutant phenotype <newline> neurogenesis ; GO:0022008 | inferred fro…	cytosolic small ribosomal subunit ; GO:0022627 | inferred from sequence or structural similarity <newline> cytosolic small ribosomal subunit ; GO:0022627 | inferred from sequence or structural similarity with NCBI_gi:4506681 <newline> nucleolus ; GO:0005730 | inferred from direct assay <newline> cytoplasm ; GO:0005737 | inferred from direct assay <newline> nuclear chromosome ; GO:0000228 | inferr…	structural constituent of ribosome ; GO:0003735 | inferred from sequence or structural similarity <newline> structural constituent of ribosome ; GO:0003735 | inferred from sequence or structural similarity with NCBI_gi:4506681	Hsap\RPS11
ACCORD_I	2R_8087309_SNP	N	4.74e-08	0.049	FBgn0083988	snoRNA:Me28S-C3420a	snoRNA:Me28S-C3420a	52	5PRIME	-	-	-	-	-
ACCORD_I	2R_8087309_SNP	N	4.74e-08	0.049	FBgn0083989	snoRNA:Me28S-C3420b	snoRNA:Me28S-C3420b	531	5PRIME	-	-	-	-	-
ACCORD_I	2R_8087580_SNP	N	4.84e-10	0.049	FBgn0033699	RpS11	Ribosomal protein S11	0	INTRON	-	translation ; GO:0006412 | inferred from sequence or structural similarity <newline> translation ; GO:0006412 | inferred from sequence or structural similarity with NCBI_gi:4506681 <newline> mitotic spindle elongation ; GO:0000022 | inferred from mutant phenotype <newline> mitotic spindle organization ; GO:0007052 | inferred from mutant phenotype <newline> neurogenesis ; GO:0022008 | inferred fro…	cytosolic small ribosomal subunit ; GO:0022627 | inferred from sequence or structural similarity <newline> cytosolic small ribosomal subunit ; GO:0022627 | inferred from sequence or structural similarity with NCBI_gi:4506681 <newline> nucleolus ; GO:0005730 | inferred from direct assay <newline> cytoplasm ; GO:0005737 | inferred from direct assay <newline> nuclear chromosome ; GO:0000228 | inferr…	structural constituent of ribosome ; GO:0003735 | inferred from sequence or structural similarity <newline> structural constituent of ribosome ; GO:0003735 | inferred from sequence or structural similarity with NCBI_gi:4506681	Hsap\RPS11
ACCORD_I	2R_8087580_SNP	N	4.84e-10	0.049	FBgn0083988	snoRNA:Me28S-C3420a	snoRNA:Me28S-C3420a	323	5PRIME	-	-	-	-	-
ACCORD_I	2R_8087580_SNP	N	4.84e-10	0.049	FBgn0083989	snoRNA:Me28S-C3420b	snoRNA:Me28S-C3420b	802	5PRIME	-	-	-	-	-
ACCORD_I	2R_8087757_SNP	N	3.9e-07	0.049	FBgn0033699	RpS11	Ribosomal protein S11	0	INTRON	-	translation ; GO:0006412 | inferred from sequence or structural similarity <newline> translation ; GO:0006412 | inferred from sequence or structural similarity with NCBI_gi:4506681 <newline> mitotic spindle elongation ; GO:0000022 | inferred from mutant phenotype <newline> mitotic spindle organization ; GO:0007052 | inferred from mutant phenotype <newline> neurogenesis ; GO:0022008 | inferred fro…	cytosolic small ribosomal subunit ; GO:0022627 | inferred from sequence or structural similarity <newline> cytosolic small ribosomal subunit ; GO:0022627 | inferred from sequence or structural similarity with NCBI_gi:4506681 <newline> nucleolus ; GO:0005730 | inferred from direct assay <newline> cytoplasm ; GO:0005737 | inferred from direct assay <newline> nuclear chromosome ; GO:0000228 | inferr…	structural constituent of ribosome ; GO:0003735 | inferred from sequence or structural similarity <newline> structural constituent of ribosome ; GO:0003735 | inferred from sequence or structural similarity with NCBI_gi:4506681	Hsap\RPS11
ACCORD_I	2R_8087757_SNP	N	3.9e-07	0.049	FBgn0083988	snoRNA:Me28S-C3420a	snoRNA:Me28S-C3420a	500	5PRIME	-	-	-	-	-
ACCORD_I	2R_8087757_SNP	N	3.9e-07	0.049	FBgn0083989	snoRNA:Me28S-C3420b	snoRNA:Me28S-C3420b	979	5PRIME	-	-	-	-	-
ACCORD_I	2R_8087771_SNP	N	7.25e-09	0.049	FBgn0033699	RpS11	Ribosomal protein S11	0	INTRON	-	translation ; GO:0006412 | inferred from sequence or structural similarity <newline> translation ; GO:0006412 | inferred from sequence or structural similarity with NCBI_gi:4506681 <newline> mitotic spindle elongation ; GO:0000022 | inferred from mutant phenotype <newline> mitotic spindle organization ; GO:0007052 | inferred from mutant phenotype <newline> neurogenesis ; GO:0022008 | inferred fro…	cytosolic small ribosomal subunit ; GO:0022627 | inferred from sequence or structural similarity <newline> cytosolic small ribosomal subunit ; GO:0022627 | inferred from sequence or structural similarity with NCBI_gi:4506681 <newline> nucleolus ; GO:0005730 | inferred from direct assay <newline> cytoplasm ; GO:0005737 | inferred from direct assay <newline> nuclear chromosome ; GO:0000228 | inferr…	structural constituent of ribosome ; GO:0003735 | inferred from sequence or structural similarity <newline> structural constituent of ribosome ; GO:0003735 | inferred from sequence or structural similarity with NCBI_gi:4506681	Hsap\RPS11
ACCORD_I	2R_8087771_SNP	N	7.25e-09	0.049	FBgn0083988	snoRNA:Me28S-C3420a	snoRNA:Me28S-C3420a	514	5PRIME	-	-	-	-	-
ACCORD_I	2R_8087771_SNP	N	7.25e-09	0.049	FBgn0083989	snoRNA:Me28S-C3420b	snoRNA:Me28S-C3420b	993	5PRIME	-	-	-	-	-
ACCORD_I	2R_8087999_SNP	N	2.37e-08	0.049	FBgn0033699	RpS11	Ribosomal protein S11	0	EXON	-	translation ; GO:0006412 | inferred from sequence or structural similarity <newline> translation ; GO:0006412 | inferred from sequence or structural similarity with NCBI_gi:4506681 <newline> mitotic spindle elongation ; GO:0000022 | inferred from mutant phenotype <newline> mitotic spindle organization ; GO:0007052 | inferred from mutant phenotype <newline> neurogenesis ; GO:0022008 | inferred fro…	cytosolic small ribosomal subunit ; GO:0022627 | inferred from sequence or structural similarity <newline> cytosolic small ribosomal subunit ; GO:0022627 | inferred from sequence or structural similarity with NCBI_gi:4506681 <newline> nucleolus ; GO:0005730 | inferred from direct assay <newline> cytoplasm ; GO:0005737 | inferred from direct assay <newline> nuclear chromosome ; GO:0000228 | inferr…	structural constituent of ribosome ; GO:0003735 | inferred from sequence or structural similarity <newline> structural constituent of ribosome ; GO:0003735 | inferred from sequence or structural similarity with NCBI_gi:4506681	Hsap\RPS11
ACCORD_I	2R_8087999_SNP	N	2.37e-08	0.049	FBgn0083988	snoRNA:Me28S-C3420a	snoRNA:Me28S-C3420a	742	5PRIME	-	-	-	-	-
ACCORD_I	2R_8088135_SNP	N	5.78e-08	0.049	FBgn0033699	RpS11	Ribosomal protein S11	0	INTRON	-	translation ; GO:0006412 | inferred from sequence or structural similarity <newline> translation ; GO:0006412 | inferred from sequence or structural similarity with NCBI_gi:4506681 <newline> mitotic spindle elongation ; GO:0000022 | inferred from mutant phenotype <newline> mitotic spindle organization ; GO:0007052 | inferred from mutant phenotype <newline> neurogenesis ; GO:0022008 | inferred fro…	cytosolic small ribosomal subunit ; GO:0022627 | inferred from sequence or structural similarity <newline> cytosolic small ribosomal subunit ; GO:0022627 | inferred from sequence or structural similarity with NCBI_gi:4506681 <newline> nucleolus ; GO:0005730 | inferred from direct assay <newline> cytoplasm ; GO:0005737 | inferred from direct assay <newline> nuclear chromosome ; GO:0000228 | inferr…	structural constituent of ribosome ; GO:0003735 | inferred from sequence or structural similarity <newline> structural constituent of ribosome ; GO:0003735 | inferred from sequence or structural similarity with NCBI_gi:4506681	Hsap\RPS11
ACCORD_I	2R_8088135_SNP	N	5.78e-08	0.049	FBgn0083988	snoRNA:Me28S-C3420a	snoRNA:Me28S-C3420a	878	5PRIME	-	-	-	-	-
ACCORD_I	2R_8088146_SNP	N	2.77e-07	0.049	FBgn0033699	RpS11	Ribosomal protein S11	0	INTRON	-	translation ; GO:0006412 | inferred from sequence or structural similarity <newline> translation ; GO:0006412 | inferred from sequence or structural similarity with NCBI_gi:4506681 <newline> mitotic spindle elongation ; GO:0000022 | inferred from mutant phenotype <newline> mitotic spindle organization ; GO:0007052 | inferred from mutant phenotype <newline> neurogenesis ; GO:0022008 | inferred fro…	cytosolic small ribosomal subunit ; GO:0022627 | inferred from sequence or structural similarity <newline> cytosolic small ribosomal subunit ; GO:0022627 | inferred from sequence or structural similarity with NCBI_gi:4506681 <newline> nucleolus ; GO:0005730 | inferred from direct assay <newline> cytoplasm ; GO:0005737 | inferred from direct assay <newline> nuclear chromosome ; GO:0000228 | inferr…	structural constituent of ribosome ; GO:0003735 | inferred from sequence or structural similarity <newline> structural constituent of ribosome ; GO:0003735 | inferred from sequence or structural similarity with NCBI_gi:4506681	Hsap\RPS11
ACCORD_I	2R_8088146_SNP	N	2.77e-07	0.049	FBgn0083988	snoRNA:Me28S-C3420a	snoRNA:Me28S-C3420a	889	5PRIME	-	-	-	-	-
ACCORD_I	2R_8088154_SNP	N	3.17e-07	0.049	FBgn0033699	RpS11	Ribosomal protein S11	0	INTRON	-	translation ; GO:0006412 | inferred from sequence or structural similarity <newline> translation ; GO:0006412 | inferred from sequence or structural similarity with NCBI_gi:4506681 <newline> mitotic spindle elongation ; GO:0000022 | inferred from mutant phenotype <newline> mitotic spindle organization ; GO:0007052 | inferred from mutant phenotype <newline> neurogenesis ; GO:0022008 | inferred fro…	cytosolic small ribosomal subunit ; GO:0022627 | inferred from sequence or structural similarity <newline> cytosolic small ribosomal subunit ; GO:0022627 | inferred from sequence or structural similarity with NCBI_gi:4506681 <newline> nucleolus ; GO:0005730 | inferred from direct assay <newline> cytoplasm ; GO:0005737 | inferred from direct assay <newline> nuclear chromosome ; GO:0000228 | inferr…	structural constituent of ribosome ; GO:0003735 | inferred from sequence or structural similarity <newline> structural constituent of ribosome ; GO:0003735 | inferred from sequence or structural similarity with NCBI_gi:4506681	Hsap\RPS11
ACCORD_I	2R_8088154_SNP	N	3.17e-07	0.049	FBgn0083988	snoRNA:Me28S-C3420a	snoRNA:Me28S-C3420a	897	5PRIME	-	-	-	-	-
ACCORD_I	2R_8089531_SNP	N	1.09e-09	0.049	Intergenic
ACCORD_I	2R_8090075_SNP	Y	5.45e-11	0.049	Intergenic
ACCORD_I	2R_8090178_SNP	N	4.3e-08	0.049	Intergenic
ACCORD_I	2R_8090226_SNP	N	2.6e-07	0.049	Intergenic
ACCORD_I	2R_8090373_SNP	N	4.67e-09	0.049	Intergenic
ACCORD_I	2R_8090491_SNP	N	2.61e-07	0.049	Intergenic
ACCORD_I	2R_8090500_SNP	N	3.17e-07	0.049	Intergenic
ACCORD_I	2R_8090508_SNP	N	5.23e-09	0.049	Intergenic
ACCORD_I	2R_8090591_SNP	N	3.17e-07	0.049	Intergenic
ACCORD_I	2R_8090650_SNP	N	8.43e-11	0.049	Intergenic
ACCORD_I	2R_8090661_SNP	N	9.92e-08	0.049	Intergenic
ACCORD_I	2R_8090678_SNP	N	1.92e-07	0.049	Intergenic
ACCORD_I	2R_8090853_SNP	N	4.33e-09	0.049	Intergenic
ACCORD_I	2R_8090938_SNP	N	8.64e-09	0.049	Intergenic
ACCORD_I	2R_8090941_INS	N	9.85e-09	0.049	Intergenic
ACCORD_I	2R_8091053_SNP	N	2.42e-07	0.049	Intergenic
ACCORD_I	2R_8091288_SNP	N	1.39e-08	0.049	Intergenic
ACCORD_I	2R_8091519_SNP	N	1.96e-07	0.049	Intergenic
ACCORD_I	2R_8091681_SNP	N	2.5e-07	0.049	Intergenic
ACCORD_I	2R_8092028_SNP	N	3.04e-07	0.049	Intergenic
ACCORD_I	2R_8092132_SNP	N	2.15e-07	0.049	Intergenic
ACCORD_I	2R_8092369_DEL	N	2.05e-07	0.049	Intergenic
ACCORD_I	2R_8092417_SNP	N	2.15e-07	0.049	Intergenic
ACCORD_I	2R_8092418_SNP	N	4.14e-07	0.049	Intergenic
ACCORD_I	2R_8092422_SNP	N	2.09e-07	0.049	Intergenic
ACCORD_I	2R_8092424_SNP	N	1.26e-07	0.049	Intergenic
ACCORD_I	2R_8092425_SNP	N	1.95e-07	0.049	Intergenic
ACCORD_I	2R_8092429_MNP	N	1.96e-07	0.049	Intergenic
ACCORD_I	2R_8092436_SNP	N	1.33e-07	0.049	Intergenic
ACCORD_I	2R_8092447_SNP	N	2.55e-07	0.049	Intergenic
ACCORD_I	2R_8092449_SNP	N	2.78e-07	0.049	Intergenic
ACCORD_I	2R_8092470_SNP	N	1.04e-07	0.049	Intergenic
ACCORD_I	2R_8092475_SNP	N	4.57e-07	0.049	Intergenic
ACCORD_I	2R_8092479_SNP	N	2.7e-07	0.049	Intergenic
ACCORD_I	2R_8092483_SNP	N	1.52e-07	0.049	Intergenic
ACCORD_I	2R_8092484_SNP	N	4.39e-07	0.049	Intergenic
ACCORD_I	2R_8092493_SNP	N	2.57e-07	0.049	Intergenic
ACCORD_I	2R_8092510_SNP	N	5.45e-07	0.049	Intergenic
ACCORD_I	2R_8092515_SNP	N	1.34e-06	0.049	Intergenic
ACCORD_I	2R_8092517_SNP	N	1.96e-06	0.049	Intergenic
ACCORD_I	2R_8092521_SNP	N	4.93e-07	0.049	Intergenic
ACCORD_I	2R_8092523_INS	N	1.65e-06	0.049	Intergenic
ACCORD_I	2R_8092585_SNP	N	7.96e-08	0.049	Intergenic
ACCORD_I	2R_8092594_SNP	N	8.95e-08	0.049	Intergenic
ACCORD_I	2R_8092611_SNP	N	2.6e-07	0.049	FBgn0266814	CR45276	CR45276	986	5PRIME	+	-	-	-	-
ACCORD_I	2R_8092619_SNP	N	1.72e-06	0.049	FBgn0266814	CR45276	CR45276	978	5PRIME	+	-	-	-	-
ACCORD_I	2R_8092623_SNP	N	2.31e-10	0.049	FBgn0266814	CR45276	CR45276	974	5PRIME	+	-	-	-	-
ACCORD_I	2R_8092628_SNP	N	1.86e-08	0.049	FBgn0266814	CR45276	CR45276	969	5PRIME	+	-	-	-	-
ACCORD_I	2R_8092633_SNP	N	1e-07	0.049	FBgn0266814	CR45276	CR45276	964	5PRIME	+	-	-	-	-
ACCORD_I	2R_8092676_SNP	N	1.36e-09	0.049	FBgn0266814	CR45276	CR45276	921	5PRIME	+	-	-	-	-
ACCORD_I	2R_8092831_SNP	N	2.74e-08	0.049	FBgn0266814	CR45276	CR45276	766	5PRIME	+	-	-	-	-
ACCORD_I	2R_8093258_SNP	N	9.95e-08	0.049	FBgn0266814	CR45276	CR45276	339	5PRIME	+	-	-	-	-
ACCORD_I	2R_8093448_SNP	N	2.99e-09	0.049	FBgn0266814	CR45276	CR45276	149	5PRIME	+	-	-	-	-
ACCORD_I	2R_8093459_SNP	N	2.03e-10	0.049	FBgn0266814	CR45276	CR45276	138	5PRIME	+	-	-	-	-
ACCORD_I	2R_8093478_SNP	N	2.75e-10	0.049	FBgn0266814	CR45276	CR45276	119	5PRIME	+	-	-	-	-
ACCORD_I	2R_8093517_SNP	N	8.29e-09	0.049	FBgn0266814	CR45276	CR45276	80	5PRIME	+	-	-	-	-
ACCORD_I	2R_8093735_SNP	N	8.39e-09	0.049	FBgn0266814	CR45276	CR45276	0	EXON	+	-	-	-	-
ACCORD_I	2R_8093736_SNP	N	1.87e-07	0.049	FBgn0266814	CR45276	CR45276	0	EXON	+	-	-	-	-
ACCORD_I	2R_8093742_SNP	N	6.44e-09	0.049	FBgn0266814	CR45276	CR45276	0	EXON	+	-	-	-	-
ACCORD_I	2R_8093749_SNP	N	8.53e-09	0.049	FBgn0266814	CR45276	CR45276	0	EXON	+	-	-	-	-
ACCORD_I	2R_8093817_SNP	N	1.48e-09	0.049	FBgn0266814	CR45276	CR45276	0	EXON	+	-	-	-	-
ACCORD_I	2R_8093827_SNP	N	2.49e-07	0.049	FBgn0266814	CR45276	CR45276	0	EXON	+	-	-	-	-
ACCORD_I	2R_8093914_SNP	N	1.11e-07	0.049	FBgn0266814	CR45276	CR45276	0	EXON	+	-	-	-	-
ACCORD_I	2R_8095440_SNP	N	3.38e-06	0.049	FBgn0020377	Sr-CII	Scavenger receptor class C, type II	958	3PRIME	-	defense response ; GO:0006952 | non-traceable author statement <newline> immune response ; GO:0006955 | inferred from electronic annotation with InterPro:IPR001212	integral component of plasma membrane ; GO:0005887 | non-traceable author statement <newline> membrane ; GO:0016020 | inferred from electronic annotation with InterPro:IPR000998	scavenger receptor activity ; GO:0005044 | inferred from sequence or structural similarity <newline> scavenger receptor activity ; GO:0005044 | non-traceable author statement <newline> polysaccharide binding ; GO:0030247 | inferred from electronic annotation with InterPro:IPR001212 <newline> scavenger receptor activity ; GO:0005044 | inferred from electronic annotation with InterPro:IPR001212	-
ACCORD_I	2R_8095440_SNP	N	3.38e-06	0.049	FBgn0266814	CR45276	CR45276	739	3PRIME	+	-	-	-	-
ACCORD_I	2R_8095440_SNP	N	3.38e-06	0.049	Intergenic
ACCORD_I	2R_8100211_SNP	N	1.18e-06	0.049	FBgn0020377	Sr-CII	Scavenger receptor class C, type II	551	5PRIME	-	defense response ; GO:0006952 | non-traceable author statement <newline> immune response ; GO:0006955 | inferred from electronic annotation with InterPro:IPR001212	integral component of plasma membrane ; GO:0005887 | non-traceable author statement <newline> membrane ; GO:0016020 | inferred from electronic annotation with InterPro:IPR000998	scavenger receptor activity ; GO:0005044 | inferred from sequence or structural similarity <newline> scavenger receptor activity ; GO:0005044 | non-traceable author statement <newline> polysaccharide binding ; GO:0030247 | inferred from electronic annotation with InterPro:IPR001212 <newline> scavenger receptor activity ; GO:0005044 | inferred from electronic annotation with InterPro:IPR001212	-
ACCORD_I	2R_8100211_SNP	N	1.18e-06	0.049	Intergenic
ACCORD_I	2R_8100211_SNP	N	1.18e-06	0.049	Intergenic
ACCORD_I	2R_8100443_SNP	N	1.4e-06	0.049	FBgn0020377	Sr-CII	Scavenger receptor class C, type II	783	5PRIME	-	defense response ; GO:0006952 | non-traceable author statement <newline> immune response ; GO:0006955 | inferred from electronic annotation with InterPro:IPR001212	integral component of plasma membrane ; GO:0005887 | non-traceable author statement <newline> membrane ; GO:0016020 | inferred from electronic annotation with InterPro:IPR000998	scavenger receptor activity ; GO:0005044 | inferred from sequence or structural similarity <newline> scavenger receptor activity ; GO:0005044 | non-traceable author statement <newline> polysaccharide binding ; GO:0030247 | inferred from electronic annotation with InterPro:IPR001212 <newline> scavenger receptor activity ; GO:0005044 | inferred from electronic annotation with InterPro:IPR001212	-
ACCORD_I	2R_8100443_SNP	N	1.4e-06	0.049	Intergenic
ACCORD_I	2R_8100443_SNP	N	1.4e-06	0.049	Intergenic
ACCORD_I	2R_8100469_SNP	N	2.39e-06	0.049	FBgn0020377	Sr-CII	Scavenger receptor class C, type II	809	5PRIME	-	defense response ; GO:0006952 | non-traceable author statement <newline> immune response ; GO:0006955 | inferred from electronic annotation with InterPro:IPR001212	integral component of plasma membrane ; GO:0005887 | non-traceable author statement <newline> membrane ; GO:0016020 | inferred from electronic annotation with InterPro:IPR000998	scavenger receptor activity ; GO:0005044 | inferred from sequence or structural similarity <newline> scavenger receptor activity ; GO:0005044 | non-traceable author statement <newline> polysaccharide binding ; GO:0030247 | inferred from electronic annotation with InterPro:IPR001212 <newline> scavenger receptor activity ; GO:0005044 | inferred from electronic annotation with InterPro:IPR001212	-
ACCORD_I	2R_8100469_SNP	N	2.39e-06	0.049	Intergenic
ACCORD_I	2R_8100469_SNP	N	2.39e-06	0.049	Intergenic
ACCORD_I	2R_8100474_SNP	N	6.45e-07	0.049	FBgn0020377	Sr-CII	Scavenger receptor class C, type II	814	5PRIME	-	defense response ; GO:0006952 | non-traceable author statement <newline> immune response ; GO:0006955 | inferred from electronic annotation with InterPro:IPR001212	integral component of plasma membrane ; GO:0005887 | non-traceable author statement <newline> membrane ; GO:0016020 | inferred from electronic annotation with InterPro:IPR000998	scavenger receptor activity ; GO:0005044 | inferred from sequence or structural similarity <newline> scavenger receptor activity ; GO:0005044 | non-traceable author statement <newline> polysaccharide binding ; GO:0030247 | inferred from electronic annotation with InterPro:IPR001212 <newline> scavenger receptor activity ; GO:0005044 | inferred from electronic annotation with InterPro:IPR001212	-
ACCORD_I	2R_8100474_SNP	N	6.45e-07	0.049	Intergenic
ACCORD_I	2R_8100474_SNP	N	6.45e-07	0.049	Intergenic
ACCORD_I	2R_8100477_SNP	N	1.67e-06	0.049	FBgn0020377	Sr-CII	Scavenger receptor class C, type II	817	5PRIME	-	defense response ; GO:0006952 | non-traceable author statement <newline> immune response ; GO:0006955 | inferred from electronic annotation with InterPro:IPR001212	integral component of plasma membrane ; GO:0005887 | non-traceable author statement <newline> membrane ; GO:0016020 | inferred from electronic annotation with InterPro:IPR000998	scavenger receptor activity ; GO:0005044 | inferred from sequence or structural similarity <newline> scavenger receptor activity ; GO:0005044 | non-traceable author statement <newline> polysaccharide binding ; GO:0030247 | inferred from electronic annotation with InterPro:IPR001212 <newline> scavenger receptor activity ; GO:0005044 | inferred from electronic annotation with InterPro:IPR001212	-
ACCORD_I	2R_8100477_SNP	N	1.67e-06	0.049	Intergenic
ACCORD_I	2R_8100477_SNP	N	1.67e-06	0.049	Intergenic
ACCORD_I	2R_8100579_SNP	N	2.53e-06	0.049	FBgn0020377	Sr-CII	Scavenger receptor class C, type II	919	5PRIME	-	defense response ; GO:0006952 | non-traceable author statement <newline> immune response ; GO:0006955 | inferred from electronic annotation with InterPro:IPR001212	integral component of plasma membrane ; GO:0005887 | non-traceable author statement <newline> membrane ; GO:0016020 | inferred from electronic annotation with InterPro:IPR000998	scavenger receptor activity ; GO:0005044 | inferred from sequence or structural similarity <newline> scavenger receptor activity ; GO:0005044 | non-traceable author statement <newline> polysaccharide binding ; GO:0030247 | inferred from electronic annotation with InterPro:IPR001212 <newline> scavenger receptor activity ; GO:0005044 | inferred from electronic annotation with InterPro:IPR001212	-
ACCORD_I	2R_8100579_SNP	N	2.53e-06	0.049	FBgn0033701	CG13171	CG13171	936	5PRIME	+	-	-	-	-
ACCORD_I	2R_8100579_SNP	N	2.53e-06	0.049	Intergenic
ACCORD_I	2R_8100579_SNP	N	2.53e-06	0.049	Intergenic
ACCORD_I	2R_9131344_INS	N	2.51e-06	0.049	FBgn0266816	CR45278	CR45278	157	3PRIME	-	-	-	-	-
ACCORD_I	2R_9131344_INS	N	2.51e-06	0.049	Intergenic
ACCORD_I	2L_14223536_SNP	Y	4.59e-07	0.049	FBgn0016930	Dyrk2	Dual-specificity tyrosine phosphorylation-regulated kinase 2	0	INTRON	-	protein phosphorylation ; GO:0006468 | non-traceable author statement <newline> protein phosphorylation ; GO:0006468 | inferred from direct assay <newline> olfactory behavior ; GO:0042048 | inferred from mutant phenotype <newline> sensory perception of smell ; GO:0007608 | inferred from mutant phenotype <newline> response to light stimulus ; GO:0009416 | inferred from mutant phenotype	cytosol ; GO:0005829 | inferred from direct assay	protein kinase activity ; GO:0004672 | non-traceable author statement <newline> protein serine/threonine kinase activity ; GO:0004674 | inferred from sequence or structural similarity <newline> ATP binding ; GO:0005524 | inferred from direct assay <newline> protein tyrosine kinase activity ; GO:0004713 | NOT inferred from direct assay <newline> protein serine/threonine kinase activity ; GO:000467…	Hsap\DYRK3 <newline> Hsap\DYRK1B <newline> Hsap\ENSG00000157540 <newline> Hsap\DYRK2 <newline> Hsap\DYRK4
ACCORD_I	3L_5085780_DEL	N	1.99e-06	0.049	FBgn0267917	lncRNA:CR46198	long non-coding RNA:CR46198	0	EXON	-
ACCORD2_I	2R_12079_SNP	N	3.44e-07	0.049	Intergenic
ACCORD2_I	2R_12079_SNP	N	3.44e-07	0.049	Intergenic
ACCORD2_I	2R_12937_SNP	N	5.85e-09	0.049	Intergenic
ACCORD2_I	2R_12937_SNP	N	5.85e-09	0.049	Intergenic
ACCORD2_I	2R_17872_SNP	N	3.38e-09	0.049	FBgn0262115	CG17683	CG17683	607	5PRIME	+	neurogenesis ; GO:0022008 | inferred from mutant phenotype	-	-	Hsap\NARFL
ACCORD2_I	2R_17873_SNP	N	8.38e-10	0.049	FBgn0262115	CG17683	CG17683	606	5PRIME	+	neurogenesis ; GO:0022008 | inferred from mutant phenotype	-	-	Hsap\NARFL
ACCORD2_I	2R_17943_SNP	N	2.42e-08	0.049	FBgn0262115	CG17683	CG17683	536	5PRIME	+	neurogenesis ; GO:0022008 | inferred from mutant phenotype	-	-	Hsap\NARFL
ACCORD2_I	2R_20262_SNP	N	3.76e-09	0.049	FBgn0262115	CG17683	CG17683	0	EXON	+	neurogenesis ; GO:0022008 | inferred from mutant phenotype	-	-	Hsap\NARFL
ACCORD2_I	2R_20262_SNP	N	3.76e-09	0.049	Intergenic
ACCORD2_I	2R_20819_SNP	N	1.72e-09	0.049	FBgn0262115	CG17683	CG17683	0	EXON	+	neurogenesis ; GO:0022008 | inferred from mutant phenotype	-	-	Hsap\NARFL
ACCORD2_I	2R_20819_SNP	N	1.72e-09	0.049	Intergenic
ACCORD2_I	2R_21373_SNP	N	3.09e-09	0.049	FBgn0262115	CG17683	CG17683	384	3PRIME	+	neurogenesis ; GO:0022008 | inferred from mutant phenotype	-	-	Hsap\NARFL
ACCORD2_I	2R_21373_SNP	N	3.09e-09	0.049	XLOC_006268			537	5PRIME	+
ACCORD2_I	2R_21373_SNP	N	3.09e-09	0.049	Intergenic
ACCORD2_I	2R_26908_SNP	Y	1.92e-10	0.049	Intergenic
ACCORD2_I	2R_26908_SNP	N	1.92e-10	0.049	Intergenic
ACCORD2_I	2R_28163_SNP	N	4.4e-08	0.049	Intergenic
ACCORD2_I	2R_28624_SNP	N	6.15e-08	0.049	Intergenic
ACCORD2_I	2R_29084_SNP	N	3.9e-09	0.049	Intergenic
ACCORD2_I	2R_40725_SNP	N	4.59e-07	0.049	Intergenic
ACCORD2_I	2R_43488_SNP	N	7.83e-08	0.049	Intergenic
ACCORD2_I	2R_43688_SNP	N	3.2e-07	0.049	Intergenic
ACCORD2_I	2R_45633_SNP	N	8.01e-09	0.049	Intergenic
ACCORD2_I	2R_46645_SNP	N	8.42e-08	0.049	Intergenic
ACCORD2_I	2R_50886_SNP	N	1.99e-07	0.049	Intergenic
ACCORD2_I	2R_50886_SNP	N	1.99e-07	0.049	XLOC_006275			0	EXON	+
ACCORD2_I	2R_50886_SNP	N	1.99e-07	0.049	Intergenic
ACCORD2_I	2R_54442_SNP	N	5.54e-09	0.049	Intergenic
ACCORD2_I	2R_72527_SNP	N	7.45e-09	0.049	Intergenic
ACCORD2_I	2R_73541_DEL	N	3.71e-07	0.049	FBgn0262116	CG40127	CG40127	799	3PRIME	-	rRNA transcription ; GO:0009303 | inferred from electronic annotation with InterPro:IPR026770	cellular_component ; GO:0005575 | no biological data available	endoribonuclease activity ; GO:0004521 | inferred from electronic annotation with InterPro:IPR026770	Hsap\RNASEK
ACCORD2_I	2R_73541_DEL	N	3.71e-07	0.049	Intergenic
ACCORD2_I	2R_76537_SNP	N	4.84e-07	0.049	FBgn0262116	CG40127	CG40127	905	5PRIME	-	rRNA transcription ; GO:0009303 | inferred from electronic annotation with InterPro:IPR026770	cellular_component ; GO:0005575 | no biological data available	endoribonuclease activity ; GO:0004521 | inferred from electronic annotation with InterPro:IPR026770	Hsap\RNASEK
ACCORD2_I	2R_76537_SNP	N	4.84e-07	0.049	Intergenic
ACCORD2_I	2R_76537_SNP	N	4.84e-07	0.049	Intergenic
ACCORD2_I	2R_77123_SNP	N	1.56e-07	0.049	Intergenic
ACCORD2_I	2R_77123_SNP	N	1.56e-07	0.049	Intergenic
ACCORD2_I	2R_79107_SNP	N	4.52e-07	0.049	Intergenic
ACCORD2_I	2R_79107_SNP	N	4.52e-07	0.049	XLOC_006282			0	EXON	+
ACCORD2_I	2R_85901_SNP	N	5.3e-08	0.049	Intergenic
ACCORD2_I	2R_85901_SNP	N	5.3e-08	0.049	XLOC_006282			0	INTRON	+
ACCORD2_I	2R_85914_SNP	N	9.95e-09	0.049	Intergenic
ACCORD2_I	2R_85914_SNP	N	9.95e-09	0.049	XLOC_006282			0	INTRON	+
ACCORD2_I	2R_88447_SNP	N	1.42e-08	0.049	Intergenic
ACCORD2_I	2R_88447_SNP	N	1.42e-08	0.049	XLOC_006282			0	INTRON	+
ACCORD2_I	2R_89612_SNP	N	3.66e-08	0.049	Intergenic
ACCORD2_I	2R_89612_SNP	N	3.66e-08	0.049	XLOC_006282			0	INTRON	+
ACCORD2_I	2R_90338_SNP	N	1.82e-07	0.049	Intergenic
ACCORD2_I	2R_90338_SNP	N	1.82e-07	0.049	XLOC_006282			0	INTRON	+
ACCORD2_I	2R_92038_SNP	N	8.99e-08	0.049	Intergenic
ACCORD2_I	2R_92038_SNP	N	8.99e-08	0.049	XLOC_006282			0	INTRON	+
ACCORD2_I	2R_92038_SNP	N	8.99e-08	0.049	Intergenic
ACCORD2_I	2R_92038_SNP	N	8.99e-08	0.049	Intergenic
ACCORD2_I	2R_92775_SNP	N	1.46e-08	0.049	XLOC_006282			0	INTRON	+
ACCORD2_I	2R_92775_SNP	N	1.46e-08	0.049	Intergenic
ACCORD2_I	2R_92775_SNP	N	1.46e-08	0.049	Intergenic
ACCORD2_I	2R_113510_SNP	N	4.07e-08	0.049	Intergenic
ACCORD2_I	2R_119225_SNP	N	3.49e-07	0.049	Intergenic
ACCORD2_I	2R_121495_SNP	N	2.98e-07	0.049	Intergenic
ACCORD2_I	2R_121496_SNP	N	1.14e-07	0.049	Intergenic
ACCORD2_I	2R_122809_SNP	N	2.03e-08	0.049	FBgn0262117	IntS3	Integrator 3	475	3PRIME	-	snRNA processing ; GO:0016180 | inferred from sequence or structural similarity with HGNC_gene:INTS3; HGNC:26153	Golgi apparatus ; GO:0005794 | inferred from direct assay <newline> integrator complex ; GO:0032039 | inferred from sequence or structural similarity with HGNC_gene:INTS3; HGNC:26153	molecular_function ; GO:0003674 | no biological data available	Hsap\ENSG00000143624
ACCORD2_I	2R_125746_SNP	N	4.26e-07	0.049	FBgn0262117	IntS3	Integrator 3	0	INTRON	-	snRNA processing ; GO:0016180 | inferred from sequence or structural similarity with HGNC_gene:INTS3; HGNC:26153	Golgi apparatus ; GO:0005794 | inferred from direct assay <newline> integrator complex ; GO:0032039 | inferred from sequence or structural similarity with HGNC_gene:INTS3; HGNC:26153	molecular_function ; GO:0003674 | no biological data available	Hsap\ENSG00000143624
ACCORD2_I	2R_125746_SNP	N	4.26e-07	0.049	XLOC_008866			936	3PRIME	-
ACCORD2_I	2R_127379_DEL	N	7.49e-07	0.049	FBgn0262117	IntS3	Integrator 3	0	INTRON	-	snRNA processing ; GO:0016180 | inferred from sequence or structural similarity with HGNC_gene:INTS3; HGNC:26153	Golgi apparatus ; GO:0005794 | inferred from direct assay <newline> integrator complex ; GO:0032039 | inferred from sequence or structural similarity with HGNC_gene:INTS3; HGNC:26153	molecular_function ; GO:0003674 | no biological data available	Hsap\ENSG00000143624
ACCORD2_I	2R_127379_DEL	N	7.49e-07	0.049	XLOC_008866			26	5PRIME	-
ACCORD2_I	2R_127875_DEL	N	2.81e-08	0.049	FBgn0262117	IntS3	Integrator 3	0	INTRON	-	snRNA processing ; GO:0016180 | inferred from sequence or structural similarity with HGNC_gene:INTS3; HGNC:26153	Golgi apparatus ; GO:0005794 | inferred from direct assay <newline> integrator complex ; GO:0032039 | inferred from sequence or structural similarity with HGNC_gene:INTS3; HGNC:26153	molecular_function ; GO:0003674 | no biological data available	Hsap\ENSG00000143624
ACCORD2_I	2R_127875_DEL	N	2.81e-08	0.049	XLOC_008866			522	5PRIME	-
ACCORD2_I	2R_132270_SNP	N	6.11e-07	0.049	Intergenic
ACCORD2_I	2R_132566_SNP	N	2.98e-07	0.049	Intergenic
ACCORD2_I	2R_146082_SNP	N	1.98e-10	0.049	Intergenic
ACCORD2_I	2R_595919_SNP	N	3.63e-07	0.049	FBgn0026401	Nipped-B	Nipped-B	0	INTRON	-	mitotic sister chromatid cohesion ; GO:0007064 | inferred from mutant phenotype <newline> regulation of transcription, DNA-templated ; GO:0006355 | inferred from mutant phenotype <newline> positive regulation of gene expression ; GO:0010628 | inferred from genetic interaction with hh <newline> positive regulation of gene expression ; GO:0010628 | inferred from mutant phenotype <newline> synaptone…	nucleus ; GO:0005634 | inferred from direct assay <newline> transcriptionally active chromatin ; GO:0035327 | inferred from direct assay <newline> cohesin complex ; GO:0008278 | colocalizes_with inferred from direct assay <newline> nucleoplasm ; GO:0005654 | inferred from direct assay <newline> polytene chromosome ; GO:0005700 | inferred from direct assay <newline> synaptonemal complex ; GO:00007…	protein binding ; GO:0005515 | inferred from physical interaction with CG4203	Hsap\ENSG00000164190
ACCORD2_I	2R_595919_SNP	N	3.63e-07	0.049	XLOC_008938			621	5PRIME	-
ACCORD2_I	2R_595919_SNP	N	3.63e-07	0.049	XLOC_008939			19	3PRIME	-
ACCORD2_I	2R_595919_SNP	N	3.63e-07	0.049	XLOC_008940			889	3PRIME	-
BARI_DM	3R_24961922_SNP	N	9.24e-11	0.02	FBgn0028671	Vha100-1	Vacuolar H[+] ATPase 100kD subunit 1	0	EXON	+	intracellular pH reduction ; GO:0051452 | inferred from mutant phenotype <newline> endosomal lumen acidification ; GO:0048388 | NOT inferred from mutant phenotype <newline> response to light stimulus ; GO:0009416 | inferred from mutant phenotype <newline> ATP hydrolysis coupled proton transport ; GO:0015991 | inferred from sequence or structural similarity with SGD_LOCUS:VPH1; SGD:S000005796	vacuolar proton-transporting V-type ATPase, V0 domain ; GO:0000220 | inferred from sequence or structural similarity with SGD_LOCUS:VPH1; SGD:S0005796 <newline> synapse ; GO:0045202 | inferred from direct assay <newline> early endosome ; GO:0005769 | inferred from direct assay <newline> synaptic vesicle ; GO:0008021 | inferred from direct assay	calmodulin binding ; GO:0005516 | inferred from direct assay <newline> proton-transporting ATPase activity, rotational mechanism ; GO:0046961 | inferred from sequence or structural similarity with SGD_LOCUS:VPH1; SGD:S000005796 <newline> photoreceptor activity ; GO:0009881 | inferred from mutant phenotype	Hsap\ATP6V0A2 <newline> Hsap\ATP6V0A1 <newline> Hsap\ATP6V0A4
BARI_DM	3R_24964071_SNP	Y	7.01e-14	0.02	FBgn0028671	Vha100-1	Vacuolar H[+] ATPase 100kD subunit 1	369	3PRIME	+	intracellular pH reduction ; GO:0051452 | inferred from mutant phenotype <newline> endosomal lumen acidification ; GO:0048388 | NOT inferred from mutant phenotype <newline> response to light stimulus ; GO:0009416 | inferred from mutant phenotype <newline> ATP hydrolysis coupled proton transport ; GO:0015991 | inferred from sequence or structural similarity with SGD_LOCUS:VPH1; SGD:S000005796	vacuolar proton-transporting V-type ATPase, V0 domain ; GO:0000220 | inferred from sequence or structural similarity with SGD_LOCUS:VPH1; SGD:S0005796 <newline> synapse ; GO:0045202 | inferred from direct assay <newline> early endosome ; GO:0005769 | inferred from direct assay <newline> synaptic vesicle ; GO:0008021 | inferred from direct assay	calmodulin binding ; GO:0005516 | inferred from direct assay <newline> proton-transporting ATPase activity, rotational mechanism ; GO:0046961 | inferred from sequence or structural similarity with SGD_LOCUS:VPH1; SGD:S000005796 <newline> photoreceptor activity ; GO:0009881 | inferred from mutant phenotype	Hsap\ATP6V0A2 <newline> Hsap\ATP6V0A1 <newline> Hsap\ATP6V0A4
BARI_DM	3R_24964071_SNP	N	7.01e-14	0.02	FBgn0039639	CG14512	CG14512	0	EXON	-	lipid glycosylation ; GO:0030259 | inferred from electronic annotation with InterPro:IPR007235	-	carbohydrate binding ; GO:0030246 | inferred from electronic annotation with InterPro:IPR007235 <newline> transferase activity, transferring hexosyl groups ; GO:0016758 | inferred from electronic annotation with InterPro:IPR007235	-
BARI_DM	3R_24964071_SNP	N	7.01e-14	0.02	FBgn0039640	CG14516	CG14516	313	5PRIME	+	proteolysis ; GO:0006508 | inferred from electronic annotation with InterPro:IPR001930	-	aminopeptidase activity ; GO:0004177 | inferred from sequence or structural similarity with UniProtKB:P15541 <newline> metallopeptidase activity ; GO:0008237 | inferred from electronic annotation with InterPro:IPR014782 <newline> zinc ion binding ; GO:0008270 | inferred from electronic annotation with InterPro:IPR014782	Hsap\ENSG00000164307 <newline> Hsap\ENPEP <newline> Hsap\TRHDE <newline> Hsap\NPEPPS <newline> Hsap\ENSG00000172901 <newline> Hsap\ERAP2 <newline> Hsap\LNPEP <newline> Hsap\ANPEP
BARI_DM	3R_24964170_SNP	N	9.52e-11	0.02	FBgn0028671	Vha100-1	Vacuolar H[+] ATPase 100kD subunit 1	468	3PRIME	+	intracellular pH reduction ; GO:0051452 | inferred from mutant phenotype <newline> endosomal lumen acidification ; GO:0048388 | NOT inferred from mutant phenotype <newline> response to light stimulus ; GO:0009416 | inferred from mutant phenotype <newline> ATP hydrolysis coupled proton transport ; GO:0015991 | inferred from sequence or structural similarity with SGD_LOCUS:VPH1; SGD:S000005796	vacuolar proton-transporting V-type ATPase, V0 domain ; GO:0000220 | inferred from sequence or structural similarity with SGD_LOCUS:VPH1; SGD:S0005796 <newline> synapse ; GO:0045202 | inferred from direct assay <newline> early endosome ; GO:0005769 | inferred from direct assay <newline> synaptic vesicle ; GO:0008021 | inferred from direct assay	calmodulin binding ; GO:0005516 | inferred from direct assay <newline> proton-transporting ATPase activity, rotational mechanism ; GO:0046961 | inferred from sequence or structural similarity with SGD_LOCUS:VPH1; SGD:S000005796 <newline> photoreceptor activity ; GO:0009881 | inferred from mutant phenotype	Hsap\ATP6V0A2 <newline> Hsap\ATP6V0A1 <newline> Hsap\ATP6V0A4
BARI_DM	3R_24964170_SNP	N	9.52e-11	0.02	FBgn0039639	CG14512	CG14512	0	EXON	-	lipid glycosylation ; GO:0030259 | inferred from electronic annotation with InterPro:IPR007235	-	carbohydrate binding ; GO:0030246 | inferred from electronic annotation with InterPro:IPR007235 <newline> transferase activity, transferring hexosyl groups ; GO:0016758 | inferred from electronic annotation with InterPro:IPR007235	-
BARI_DM	3R_24964170_SNP	N	9.52e-11	0.02	FBgn0039640	CG14516	CG14516	214	5PRIME	+	proteolysis ; GO:0006508 | inferred from electronic annotation with InterPro:IPR001930	-	aminopeptidase activity ; GO:0004177 | inferred from sequence or structural similarity with UniProtKB:P15541 <newline> metallopeptidase activity ; GO:0008237 | inferred from electronic annotation with InterPro:IPR014782 <newline> zinc ion binding ; GO:0008270 | inferred from electronic annotation with InterPro:IPR014782	Hsap\ENSG00000164307 <newline> Hsap\ENPEP <newline> Hsap\TRHDE <newline> Hsap\NPEPPS <newline> Hsap\ENSG00000172901 <newline> Hsap\ERAP2 <newline> Hsap\LNPEP <newline> Hsap\ANPEP
BATUMI_LTR	X_21388068_DEL	N	2.52e-08	0.042	FBgn0031182	Cyp6t1	Cyp6t1	393	3PRIME	-	oxidation-reduction process ; GO:0055114 | inferred from electronic annotation with InterPro:IPR001128, InterPro:IPR002401, InterPro:IPR017972	membrane ; GO:0016020 | non-traceable author statement <newline> intracellular membrane-bounded organelle ; GO:0043231 | non-traceable author statement	electron carrier activity ; GO:0009055 | non-traceable author statement <newline> electron carrier activity ; GO:0009055 | inferred from sequence or structural similarity <newline> oxidoreductase activity, acting on paired donors, with incorporation or reduction of molecular oxygen ; GO:0016705 | inferred from electronic annotation with InterPro:IPR001128, InterPro:IPR002401, InterPro:IPR017972 <…	-
BATUMI_LTR	X_21388068_DEL	N	2.52e-08	0.042	FBgn0266457	CR45082	CR45082	0	INTRON	-	-	-	-	-
BATUMI_LTR	X_21388068_DEL	N	2.52e-08	0.042	XLOC_030730			0	INTRON	+
BATUMI_LTR	X_21397188_SNP	N	4.65e-10	0.042	Intergenic
BATUMI_LTR	X_21397191_DEL	Y	9.24e-21	0.042	Intergenic
BATUMI_LTR	X_21402223_SNP	N	3.35e-09	0.042	Intergenic
BATUMI_LTR	X_21424617_SNP	N	4.52e-09	0.042	Intergenic
BATUMI_LTR	X_21424986_SNP	N	1.34e-17	0.042	Intergenic
BATUMI_LTR	X_21425223_SNP	N	4.2e-19	0.042	Intergenic
BATUMI_LTR	X_21425639_DEL	N	6.43e-08	0.042	Intergenic
BATUMI_LTR	X_21425648_SNP	N	1.65e-12	0.042	Intergenic
BATUMI_LTR	X_21425695_SNP	N	4.72e-12	0.042	Intergenic
BATUMI_LTR	X_21425719_SNP	N	2.49e-09	0.042	Intergenic
BATUMI_LTR	X_21425823_SNP	N	4.55e-13	0.042	Intergenic
BATUMI_LTR	X_21425831_SNP	N	1.08e-13	0.042	Intergenic
BATUMI_LTR	X_21425835_SNP	N	3.34e-14	0.042	Intergenic
BATUMI_LTR	X_21425881_SNP	N	2.54e-11	0.042	Intergenic
BATUMI_LTR	X_21425966_SNP	N	1.22e-07	0.042	Intergenic
BATUMI_LTR	X_21425973_SNP	N	4.19e-08	0.042	Intergenic
BATUMI_LTR	X_21426078_SNP	N	6.63e-14	0.042	Intergenic
BATUMI_LTR	X_21426079_SNP	N	1.56e-13	0.042	Intergenic
BATUMI_LTR	X_21426187_SNP	N	4.04e-08	0.042	Intergenic
BATUMI_LTR	X_21426188_SNP	N	1.04e-07	0.042	Intergenic
BATUMI_LTR	X_21426190_SNP	N	5.06e-15	0.042	Intergenic
BATUMI_LTR	X_21426249_SNP	N	5.27e-08	0.042	Intergenic
BATUMI_LTR	X_21426308_SNP	N	6.7e-17	0.042	Intergenic
BATUMI_LTR	X_21426458_SNP	N	4.08e-11	0.042	Intergenic
BATUMI_LTR	X_21426468_SNP	N	2.18e-11	0.042	Intergenic
BATUMI_LTR	X_21426575_SNP	N	3.06e-11	0.042	Intergenic
BATUMI_LTR	X_21426657_SNP	N	2.79e-09	0.042	Intergenic
BATUMI_LTR	X_21426825_SNP	N	2.93e-10	0.042	Intergenic
BATUMI_LTR	X_21426970_SNP	N	1.22e-09	0.042	Intergenic
BATUMI_LTR	X_21428155_SNP	N	4.67e-08	0.042	Intergenic
BATUMI_LTR	X_21428162_SNP	N	3.55e-07	0.042	Intergenic
BATUMI_LTR	X_21429177_SNP	N	9.85e-08	0.042	Intergenic
BATUMI_LTR	X_21429192_SNP	N	4.4e-07	0.042	Intergenic
BATUMI_LTR	X_21429534_SNP	N	4.03e-08	0.042	Intergenic
BATUMI_LTR	X_21429883_SNP	N	3.96e-08	0.042	Intergenic
BATUMI_LTR	X_21430115_SNP	N	3.71e-08	0.042	Intergenic
BATUMI_LTR	X_21430139_SNP	N	4.59e-07	0.042	Intergenic
BATUMI_LTR	X_21430177_SNP	N	3.48e-09	0.042	Intergenic
BATUMI_LTR	X_21430181_SNP	N	4.07e-09	0.042	Intergenic
BATUMI_LTR	X_21430182_SNP	N	1.51e-08	0.042	Intergenic
BATUMI_LTR	X_21430218_DEL	N	4.63e-08	0.042	Intergenic
BATUMI_LTR	X_21430261_SNP	N	2.35e-09	0.042	Intergenic
BATUMI_LTR	X_21430267_SNP	N	5.88e-09	0.042	Intergenic
BATUMI_LTR	X_21430310_SNP	N	2.56e-09	0.042	Intergenic
BATUMI_LTR	X_21430371_SNP	N	1.33e-09	0.042	Intergenic
BATUMI_LTR	X_21430423_SNP	N	1.77e-07	0.042	Intergenic
BATUMI_LTR	X_21430498_SNP	N	2.69e-07	0.042	Intergenic
BATUMI_LTR	X_21430869_SNP	N	6.47e-09	0.042	Intergenic
BATUMI_LTR	X_21431186_SNP	N	4.88e-09	0.042	Intergenic
BATUMI_LTR	X_21431210_SNP	N	1.21e-07	0.042	Intergenic
BATUMI_LTR	X_21431250_SNP	N	4.09e-08	0.042	Intergenic
BATUMI_LTR	X_21431293_SNP	N	2.07e-07	0.042	Intergenic
BATUMI_LTR	X_21431338_SNP	N	3.15e-07	0.042	Intergenic
BATUMI_LTR	X_21431575_DEL	N	1.16e-06	0.042	Intergenic
BATUMI_LTR	X_21431885_SNP	N	9.81e-07	0.042	Intergenic
BATUMI_LTR	X_21431938_INS	N	1.58e-07	0.042	Intergenic
BATUMI_LTR	X_21432211_SNP	N	7.16e-08	0.042	Intergenic
BATUMI_LTR	X_21432502_SNP	N	4.05e-07	0.042	Intergenic
BATUMI_LTR	X_21432690_SNP	N	8.57e-08	0.042	Intergenic
BATUMI_LTR	X_21432707_SNP	N	6.66e-10	0.042	Intergenic
BATUMI_LTR	X_21433085_SNP	N	9.52e-07	0.042	Intergenic
BATUMI_LTR	X_21433351_SNP	N	4.8e-07	0.042	Intergenic
BATUMI_LTR	X_21433452_INS	N	8.42e-10	0.042	Intergenic
BATUMI_LTR	X_21433637_INS	N	4.85e-11	0.042	Intergenic
BATUMI_LTR	X_21433643_SNP	N	2.6e-08	0.042	Intergenic
BATUMI_LTR	X_21433644_SNP	N	9.43e-09	0.042	Intergenic
BATUMI_LTR	X_21434039_DEL	N	3.34e-07	0.042	Intergenic
BATUMI_LTR	X_21435446_SNP	N	1.51e-07	0.042	Intergenic
BATUMI_LTR	X_21435447_SNP	N	5.49e-07	0.042	Intergenic
BATUMI_LTR	X_21435527_SNP	N	8.06e-09	0.042	Intergenic
BATUMI_LTR	X_21435584_SNP	N	7.65e-08	0.042	Intergenic
BATUMI_LTR	X_21435705_SNP	N	5.67e-08	0.042	Intergenic
BATUMI_LTR	X_21435830_INS	N	2.18e-08	0.042	Intergenic
BATUMI_LTR	X_21435987_SNP	N	1.01e-06	0.042	Intergenic
BATUMI_LTR	X_21436473_SNP	N	9.21e-07	0.042	Intergenic
BATUMI_LTR	X_21438750_SNP	N	9.72e-07	0.042	Intergenic
BATUMI_LTR	X_21441106_SNP	N	1.21e-06	0.042	Intergenic
BATUMI_LTR	2R_8734907_SNP	N	1.18e-06	0.042	FBgn0050486	CG30486	CG30486	632	3PRIME	-	multicellular organism reproduction ; GO:0032504 | inferred from expression pattern	extracellular region ; GO:0005576 | inferred from sequence model <newline> extracellular space ; GO:0005615 | inferred from direct assay	molecular_function ; GO:0003674 | no biological data available	-
BATUMI_LTR	2R_8734907_SNP	N	1.18e-06	0.042	FBgn0050488	antr	antares	0	INTRON	-	multicellular organism reproduction ; GO:0032504 | inferred from expression pattern <newline> negative regulation of female receptivity, post-mating ; GO:0045434 | inferred from mutant phenotype <newline> sperm storage ; GO:0046693 | inferred from mutant phenotype	extracellular region ; GO:0005576 | inferred from sequence model <newline> extracellular space ; GO:0005615 | inferred from direct assay	molecular_function ; GO:0003674 | no biological data available	-
BATUMI_LTR	2R_8734907_SNP	N	1.18e-06	0.042	FBgn0250842	CG17575	CG17575	806	5PRIME	-	regulation of female receptivity, post-mating ; GO:0046008 | inferred from mutant phenotype <newline> sperm competition ; GO:0046692 | inferred from direct assay <newline> protein localization ; GO:0008104 | inferred from mutant phenotype <newline> multicellular organism reproduction ; GO:0032504 | inferred from expression pattern	extracellular region ; GO:0005576 | inferred from sequence model <newline> extracellular space ; GO:0005615 | inferred from direct assay <newline> extracellular space ; GO:0005615 | inferred from sequence model	molecular_function ; GO:0003674 | no biological data available	-
BATUMI_LTR	2R_8734907_SNP	N	1.18e-06	0.042	FBgn0267024	CR45468	CR45468	737	5PRIME	+	-	-	-	-
BATUMI_LTR	3L_7025059_SNP	N	8.05e-07	0.042	FBgn0260660	Mp	Multiplexin	0	INTRON	+	motor neuron axon guidance ; GO:0008045 | inferred from mutant phenotype <newline> cell adhesion ; GO:0007155 | inferred from electronic annotation with InterPro:IPR003129, InterPro:IPR010515 <newline> mitochondrion organization ; GO:0007005 | inferred from mutant phenotype <newline> cardiac muscle atrophy ; GO:0014899 | inferred from mutant phenotype <newline> skeletal muscle atrophy ; GO:001473…	collagen ; GO:0005581 | inferred from sequence or structural similarity <newline> extracellular matrix ; GO:0031012 | inferred from electronic annotation with InterPro:IPR010515	structural molecule activity ; GO:0005198 | inferred from electronic annotation with InterPro:IPR003129, InterPro:IPR010515 <newline> carbohydrate binding ; GO:0030246 | inferred from sequence or structural similarity with Lectin-galC1	Hsap\COL15A1 <newline> Hsap\ENSG00000182871
BATUMI_LTR	3L_7025059_SNP	N	8.05e-07	0.042	Intergenic
BATUMI_LTR	3L_7025059_SNP	N	8.05e-07	0.042	Intergenic
BATUMI_LTR	3L_7025065_SNP	N	8.05e-07	0.042	FBgn0260660	Mp	Multiplexin	0	INTRON	+	motor neuron axon guidance ; GO:0008045 | inferred from mutant phenotype <newline> cell adhesion ; GO:0007155 | inferred from electronic annotation with InterPro:IPR003129, InterPro:IPR010515 <newline> mitochondrion organization ; GO:0007005 | inferred from mutant phenotype <newline> cardiac muscle atrophy ; GO:0014899 | inferred from mutant phenotype <newline> skeletal muscle atrophy ; GO:001473…	collagen ; GO:0005581 | inferred from sequence or structural similarity <newline> extracellular matrix ; GO:0031012 | inferred from electronic annotation with InterPro:IPR010515	structural molecule activity ; GO:0005198 | inferred from electronic annotation with InterPro:IPR003129, InterPro:IPR010515 <newline> carbohydrate binding ; GO:0030246 | inferred from sequence or structural similarity with Lectin-galC1	Hsap\COL15A1 <newline> Hsap\ENSG00000182871
BATUMI_LTR	3L_7025065_SNP	N	8.05e-07	0.042	Intergenic
BATUMI_LTR	3L_7025065_SNP	N	8.05e-07	0.042	Intergenic
BATUMI_LTR	3L_8415443_SNP	N	1.19e-06	0.042	FBgn0052354	CG32354	CG32354	138	5PRIME	-	-	extracellular region ; GO:0005576 | inferred from sequence or structural similarity with UniProtKB:P25304	endopeptidase inhibitor activity ; GO:0004866 | inferred from sequence or structural similarity with UniProtKB:Q26057	-
BATUMI_LTR	3L_8415448_SNP	Y	1.07e-06	0.042	FBgn0052354	CG32354	CG32354	143	5PRIME	-	-	extracellular region ; GO:0005576 | inferred from sequence or structural similarity with UniProtKB:P25304	endopeptidase inhibitor activity ; GO:0004866 | inferred from sequence or structural similarity with UniProtKB:Q26057	-
Bica_I	X_20679183_SNP	N	9.31e-07	0.049	FBgn0085387	shakB	shaking B	0	INTRON	-	jump response ; GO:0007630 | inferred from mutant phenotype <newline> phototransduction ; GO:0007602 | inferred from mutant phenotype <newline> response to light stimulus ; GO:0009416 | inferred from mutant phenotype <newline> gap junction assembly ; GO:0016264 | inferred from mutant phenotype <newline> cell communication by electrical coupling ; GO:0010644 | inferred from mutant phenotype <newli…	gap junction ; GO:0005921 | non-traceable author statement <newline> gap junction ; GO:0005921 | inferred from direct assay <newline> gap junction ; GO:0005921 | inferred from mutant phenotype <newline> plasma membrane ; GO:0005886 | inferred from direct assay	gap junction channel activity ; GO:0005243 | inferred from mutant phenotype	-
Bica_I	X_20679207_SNP	N	9.07e-07	0.049	FBgn0085387	shakB	shaking B	0	INTRON	-	jump response ; GO:0007630 | inferred from mutant phenotype <newline> phototransduction ; GO:0007602 | inferred from mutant phenotype <newline> response to light stimulus ; GO:0009416 | inferred from mutant phenotype <newline> gap junction assembly ; GO:0016264 | inferred from mutant phenotype <newline> cell communication by electrical coupling ; GO:0010644 | inferred from mutant phenotype <newli…	gap junction ; GO:0005921 | non-traceable author statement <newline> gap junction ; GO:0005921 | inferred from direct assay <newline> gap junction ; GO:0005921 | inferred from mutant phenotype <newline> plasma membrane ; GO:0005886 | inferred from direct assay	gap junction channel activity ; GO:0005243 | inferred from mutant phenotype	-
Bica_I	2L_22803513_SNP	N	6.14e-07	0.049	Intergenic
Bica_I	2L_22803513_SNP	N	6.14e-07	0.049	Intergenic
Bica_I	3R_61348_SNP	N	1.51e-07	0.049	FBgn0010225	Gel	Gelsolin	0	INTRON	+	phagocytosis ; GO:0006909 | inferred from mutant phenotype	actin filament ; GO:0005884 | inferred from direct assay <newline> cytosol ; GO:0005829 | inferred from direct assay <newline> extracellular region ; GO:0005576 | inferred from direct assay	actin binding ; GO:0003779 | inferred from sequence or structural similarity <newline> actin binding ; GO:0003779 | inferred from sequence or structural similarity with UniProtKB:P20305	Hsap\AVIL <newline> Hsap\VILL <newline> Hsap\SCIN <newline> Hsap\CAPG <newline> Hsap\VIL1 <newline> Hsap\GSN
Bica_I	3R_61348_SNP	N	1.51e-07	0.049	FBgn0015331	abs	abstrakt	585	3PRIME	+	apoptotic process ; GO:0006915 | non-traceable author statement <newline> establishment of cell polarity ; GO:0030010 | non-traceable author statement <newline> anatomical structure morphogenesis ; GO:0009653 | non-traceable author statement <newline> nervous system development ; GO:0007399 | non-traceable author statement <newline> mRNA splicing, via spliceosome ; GO:0000398 | inferred by curato…	nucleus ; GO:0005634 | non-traceable author statement <newline> precatalytic spliceosome ; GO:0071011 | inferred from direct assay <newline> catalytic step 2 spliceosome ; GO:0071013 | inferred from direct assay	ATP-dependent RNA helicase activity ; GO:0004004 | non-traceable author statement <newline> ATP-dependent helicase activity ; GO:0008026 | inferred from sequence or structural similarity with InterPro:IPR001410 <newline> helicase activity ; GO:0004386 | inferred from sequence or structural similarity <newline> ATP binding ; GO:0005524 | inferred from electronic annotation with InterPro:IPR001650,…	Hsap\ENSG00000183258
Bica_I	3R_70135_SNP	N	1.24e-06	0.049	FBgn0037223	TwdlU	TweedleU	0	EXON	+	-	-	-	-
Bica_I	3R_108731_SNP	N	1.72e-07	0.049	FBgn0041605	cpx	complexin	0	INTRON	+	synaptic vesicle exocytosis ; GO:0016079 | inferred from sequence or structural similarity <newline> synaptic vesicle exocytosis ; GO:0016079 | inferred from sequence or structural similarity with UniProtKB:P63040, UniProtKB:Q8R1B5 <newline> synaptic vesicle exocytosis ; GO:0016079 | inferred from mutant phenotype <newline> synaptic growth at neuromuscular junction ; GO:0051124 | inferred from mu…	membrane ; GO:0016020 | inferred from sequence or structural similarity with UniProtKB:Q8R1B5 <newline> terminal bouton ; GO:0043195 | inferred from direct assay <newline> presynaptic active zone ; GO:0048786 | inferred from direct assay <newline> membrane ; GO:0016020 | inferred from direct assay	neurotransmitter transporter activity ; GO:0005326 | inferred from sequence or structural similarity with UniProtKB:P63040, UniProtKB:Q8R1B5 <newline> syntaxin binding ; GO:0019905 | inferred from electronic annotation with InterPro:IPR008849	-
Bica_I	3R_175017_SNP	N	3.87e-08	0.049	Intergenic
Bica_I	3R_190583_SNP	N	1.99e-06	0.049	FBgn0037238	CG1090	CG1090	0	EXON	+	sodium ion transport ; GO:0006814 | inferred from sequence or structural similarity with UniProtKB:Q9U6A0 <newline> calcium ion transport ; GO:0006816 | inferred from sequence or structural similarity with UniProtKB:Q9U6A0 <newline> transmembrane transport ; GO:0055085 | inferred from electronic annotation with InterPro:IPR004837	integral component of membrane ; GO:0016021 | inferred from sequence or structural similarity with UniProtKB:Q9U6A0	calcium, potassium:sodium antiporter activity ; GO:0008273 | inferred from sequence or structural similarity with UniProtKB:Q28139 <newline> calcium, potassium:sodium antiporter activity ; GO:0008273 | inferred from sequence or structural similarity with UniProtKB:Q9U6A0	Hsap\ENSG00000140090 <newline> Hsap\SLC24A2 <newline> Hsap\SLC24A3 <newline> Hsap\SLC24A5 <newline> Hsap\SLC24A1
Bica_I	3R_190583_SNP	N	1.99e-06	0.049	Intergenic
Bica_I	3R_191775_SNP	N	6.25e-07	0.049	FBgn0037238	CG1090	CG1090	0	EXON	+	sodium ion transport ; GO:0006814 | inferred from sequence or structural similarity with UniProtKB:Q9U6A0 <newline> calcium ion transport ; GO:0006816 | inferred from sequence or structural similarity with UniProtKB:Q9U6A0 <newline> transmembrane transport ; GO:0055085 | inferred from electronic annotation with InterPro:IPR004837	integral component of membrane ; GO:0016021 | inferred from sequence or structural similarity with UniProtKB:Q9U6A0	calcium, potassium:sodium antiporter activity ; GO:0008273 | inferred from sequence or structural similarity with UniProtKB:Q28139 <newline> calcium, potassium:sodium antiporter activity ; GO:0008273 | inferred from sequence or structural similarity with UniProtKB:Q9U6A0	Hsap\ENSG00000140090 <newline> Hsap\SLC24A2 <newline> Hsap\SLC24A3 <newline> Hsap\SLC24A5 <newline> Hsap\SLC24A1
Bica_I	3R_191775_SNP	N	6.25e-07	0.049	Intergenic
Bica_I	3R_210210_SNP	N	1.12e-06	0.049	FBgn0037240	Cont	Contactin	0	EXON	+	establishment or maintenance of epithelial cell apical/basal polarity ; GO:0045197 | inferred by curator from GO:0005918 <newline> septate junction assembly ; GO:0019991 | inferred from mutant phenotype <newline> cell adhesion ; GO:0007155 | inferred from sequence or structural similarity with UniProtKB:P28685 <newline> axon ensheathment ; GO:0008366 | inferred from mutant phenotype <newline> ner…	pleated septate junction ; GO:0005919 | inferred from direct assay <newline> septate junction ; GO:0005918 | inferred from direct assay <newline> septate junction ; GO:0005918 | non-traceable author statement <newline> plasma membrane ; GO:0005886 | inferred from direct assay	carbohydrate binding ; GO:0030246 | inferred from electronic annotation with InterPro:IPR001304	-
Bica_I	3R_213266_DEL	N	4.1e-07	0.049	FBgn0003882	tub	tube	198	5PRIME	+	Toll signaling pathway ; GO:0008063 | non-traceable author statement <newline> zygotic specification of dorsal/ventral axis ; GO:0007352 | non-traceable author statement <newline> defense response ; GO:0006952 | traceable author statement <newline> dorsal/ventral axis specification ; GO:0009950 | traceable author statement <newline> hemopoiesis ; GO:0030097 | traceable author statement <newline> …	cytoplasm ; GO:0005737 | non-traceable author statement <newline> cytoplasm ; GO:0005737 | inferred from direct assay <newline> plasma membrane ; GO:0005886 | inferred from direct assay <newline> cytosol ; GO:0005829 | inferred from direct assay	protein domain specific binding ; GO:0019904 | inferred from physical interaction with UniProtKB:Q05652 <newline> protein binding ; GO:0005515 | inferred from physical interaction with UniProtKB:Q05652	-
Bica_I	3R_213266_DEL	N	4.1e-07	0.049	FBgn0037240	Cont	Contactin	526	3PRIME	+	establishment or maintenance of epithelial cell apical/basal polarity ; GO:0045197 | inferred by curator from GO:0005918 <newline> septate junction assembly ; GO:0019991 | inferred from mutant phenotype <newline> cell adhesion ; GO:0007155 | inferred from sequence or structural similarity with UniProtKB:P28685 <newline> axon ensheathment ; GO:0008366 | inferred from mutant phenotype <newline> ner…	pleated septate junction ; GO:0005919 | inferred from direct assay <newline> septate junction ; GO:0005918 | inferred from direct assay <newline> septate junction ; GO:0005918 | non-traceable author statement <newline> plasma membrane ; GO:0005886 | inferred from direct assay	carbohydrate binding ; GO:0030246 | inferred from electronic annotation with InterPro:IPR001304	-
Bica_I	3R_224327_SNP	N	9.7e-08	0.049	FBgn0037242	CG9855	CG9855	730	5PRIME	-	protein polyubiquitination ; GO:0000209 | inferred from sequence or structural similarity with HGNC_gene:MARCH5; HGNC:26025	mitochondrial outer membrane ; GO:0005741 | inferred from sequence or structural similarity with HGNC_gene:MARCH5; HGNC:26025 <newline> endoplasmic reticulum membrane ; GO:0005789 | inferred from sequence or structural similarity with HGNC_gene:MARCH5; HGNC:26025	zinc ion binding ; GO:0008270 | inferred from electronic annotation with InterPro:IPR011016 <newline> ubiquitin-protein ligase activity ; GO:0004842 | inferred from sequence or structural similarity with HGNC_gene:MARCH5; HGNC:26025	Hsap\MARCH5
Bica_I	3R_224327_SNP	N	9.7e-08	0.049	FBgn0086605	CG9853	CG9853	0	EXON	-	biological_process ; GO:0008150 | no biological data available	cellular_component ; GO:0005575 | no biological data available	molecular_function ; GO:0003674 | no biological data available	Hsap\GET4
Bica_I	3R_225814_SNP	N	1.58e-07	0.049	FBgn0037244	CG14647	CG14647	418	5PRIME	+	protein homooligomerization ; GO:0051260 | inferred from electronic annotation with InterPro:IPR003131	-	-	Hsap\KCTD9
Bica_I	3R_225814_SNP	N	1.58e-07	0.049	FBgn0086605	CG9853	CG9853	0	EXON	-	biological_process ; GO:0008150 | no biological data available	cellular_component ; GO:0005575 | no biological data available	molecular_function ; GO:0003674 | no biological data available	Hsap\GET4
Bica_I	3R_247581_SNP	N	7.56e-07	0.049	FBgn0037248	srl	spargel	624	3PRIME	-	negative regulation of insulin receptor signaling pathway ; GO:0046627 | inferred from mutant phenotype <newline> regulation of transcription, DNA-templated ; GO:0006355 | inferred from mutant phenotype <newline> insulin receptor signaling pathway ; GO:0008286 | inferred from mutant phenotype <newline> regulation of mitochondrion organization ; GO:0010821 | inferred from genetic interaction with …	nucleus ; GO:0005634 | colocalizes_with inferred from direct assay <newline> cytoplasm ; GO:0005737 | colocalizes_with inferred from direct assay <newline> nuclear speck ; GO:0016607 | inferred from direct assay	mRNA binding ; GO:0003729 | inferred from sequence or structural similarity <newline> nucleic acid binding ; GO:0003676 | inferred from electronic annotation with InterPro:IPR000504 <newline> nucleotide binding ; GO:0000166 | inferred from electronic annotation with InterPro:IPR012677	Hsap\PPRC1 <newline> Hsap\PPARGC1A <newline> Hsap\ENSG00000155846
Bica_I	3R_247581_SNP	N	7.56e-07	0.049	Intergenic
Bica_I	3R_255740_SNP	N	9.09e-07	0.049	FBgn0037248	srl	spargel	683	5PRIME	-	negative regulation of insulin receptor signaling pathway ; GO:0046627 | inferred from mutant phenotype <newline> regulation of transcription, DNA-templated ; GO:0006355 | inferred from mutant phenotype <newline> insulin receptor signaling pathway ; GO:0008286 | inferred from mutant phenotype <newline> regulation of mitochondrion organization ; GO:0010821 | inferred from genetic interaction with …	nucleus ; GO:0005634 | colocalizes_with inferred from direct assay <newline> cytoplasm ; GO:0005737 | colocalizes_with inferred from direct assay <newline> nuclear speck ; GO:0016607 | inferred from direct assay	mRNA binding ; GO:0003729 | inferred from sequence or structural similarity <newline> nucleic acid binding ; GO:0003676 | inferred from electronic annotation with InterPro:IPR000504 <newline> nucleotide binding ; GO:0000166 | inferred from electronic annotation with InterPro:IPR012677	Hsap\PPRC1 <newline> Hsap\PPARGC1A <newline> Hsap\ENSG00000155846
Bica_I	3R_255740_SNP	N	9.09e-07	0.049	FBgn0037249	eIF3-S10	eIF3-S10	0	EXON	-	translational initiation ; GO:0006413 | inferred from sequence or structural similarity <newline> translational initiation ; GO:0006413 | inferred from sequence or structural similarity with EMBL:AL031739; protein_id:CAA21076 <newline> mitotic spindle elongation ; GO:0000022 | inferred from mutant phenotype <newline> mitotic spindle organization ; GO:0007052 | inferred from mutant phenotype	cytosol ; GO:0005829 | inferred from sequence or structural similarity <newline> eukaryotic translation initiation factor 3 complex ; GO:0005852 | inferred from sequence or structural similarity <newline> eukaryotic translation initiation factor 3 complex ; GO:0005852 | inferred from sequence or structural similarity with EMBL:AL031739; protein_id:CAA21076	translation initiation factor activity ; GO:0003743 | inferred from sequence or structural similarity <newline> translation initiation factor activity ; GO:0003743 | inferred from sequence or structural similarity with EMBL:AL031739; protein_id:CAA21076	Hsap\EIF3A
Bica_I	3R_277287_SNP	N	6.13e-07	0.049	FBgn0051522	CG31522	CG31522	0	INTRON	-	fatty acid biosynthetic process ; GO:0006633 | inferred from sequence or structural similarity with UniProtKB:Q9BW60 <newline> very long-chain fatty acid metabolic process ; GO:0000038 | inferred from sequence or structural similarity with UniProtKB:Q9BW60 <newline> fatty acid elongation ; GO:0030497 | inferred from sequence or structural similarity with bond	integral component of membrane ; GO:0016021 | inferred from electronic annotation with InterPro:IPR002076 <newline> cellular_component ; GO:0005575 | no biological data available	fatty acid elongase activity ; GO:0009922 | inferred from sequence or structural similarity with bond	Hsap\ELOVL7 <newline> Hsap\ELOVL1 <newline> Hsap\ELOVL4 <newline> Hsap\ELOVL5 <newline> Hsap\ELOVL2
Bica_I	3R_277287_SNP	N	6.13e-07	0.049	XLOC_022892			305	3PRIME	-
Bica_I	3R_279694_DEL	N	4.1e-07	0.049	FBgn0051522	CG31522	CG31522	0	INTRON	-	fatty acid biosynthetic process ; GO:0006633 | inferred from sequence or structural similarity with UniProtKB:Q9BW60 <newline> very long-chain fatty acid metabolic process ; GO:0000038 | inferred from sequence or structural similarity with UniProtKB:Q9BW60 <newline> fatty acid elongation ; GO:0030497 | inferred from sequence or structural similarity with bond	integral component of membrane ; GO:0016021 | inferred from electronic annotation with InterPro:IPR002076 <newline> cellular_component ; GO:0005575 | no biological data available	fatty acid elongase activity ; GO:0009922 | inferred from sequence or structural similarity with bond	Hsap\ELOVL7 <newline> Hsap\ELOVL1 <newline> Hsap\ELOVL4 <newline> Hsap\ELOVL5 <newline> Hsap\ELOVL2
Bica_I	3R_279694_DEL	N	4.1e-07	0.049	FBgn0263620	CR43629	CR43629	0	EXON	+	-	-	-	-
Bica_I	3R_279694_DEL	N	4.1e-07	0.049	XLOC_022893			520	3PRIME	-
Bica_I	3R_279694_DEL	N	4.1e-07	0.049	XLOC_022894			911	3PRIME	-
Bica_I	3R_287726_SNP	N	1.03e-07	0.049	FBgn0051522	CG31522	CG31522	0	INTRON	-	fatty acid biosynthetic process ; GO:0006633 | inferred from sequence or structural similarity with UniProtKB:Q9BW60 <newline> very long-chain fatty acid metabolic process ; GO:0000038 | inferred from sequence or structural similarity with UniProtKB:Q9BW60 <newline> fatty acid elongation ; GO:0030497 | inferred from sequence or structural similarity with bond	integral component of membrane ; GO:0016021 | inferred from electronic annotation with InterPro:IPR002076 <newline> cellular_component ; GO:0005575 | no biological data available	fatty acid elongase activity ; GO:0009922 | inferred from sequence or structural similarity with bond	Hsap\ELOVL7 <newline> Hsap\ELOVL1 <newline> Hsap\ELOVL4 <newline> Hsap\ELOVL5 <newline> Hsap\ELOVL2
Bica_I	3R_287726_SNP	N	1.03e-07	0.049	Intergenic
Bica_I	3R_287736_SNP	N	1.33e-07	0.049	FBgn0051522	CG31522	CG31522	0	INTRON	-	fatty acid biosynthetic process ; GO:0006633 | inferred from sequence or structural similarity with UniProtKB:Q9BW60 <newline> very long-chain fatty acid metabolic process ; GO:0000038 | inferred from sequence or structural similarity with UniProtKB:Q9BW60 <newline> fatty acid elongation ; GO:0030497 | inferred from sequence or structural similarity with bond	integral component of membrane ; GO:0016021 | inferred from electronic annotation with InterPro:IPR002076 <newline> cellular_component ; GO:0005575 | no biological data available	fatty acid elongase activity ; GO:0009922 | inferred from sequence or structural similarity with bond	Hsap\ELOVL7 <newline> Hsap\ELOVL1 <newline> Hsap\ELOVL4 <newline> Hsap\ELOVL5 <newline> Hsap\ELOVL2
Bica_I	3R_287736_SNP	N	1.33e-07	0.049	Intergenic
Bica_I	3R_291155_SNP	N	1.1e-06	0.049	FBgn0051523	CG31523	CG31523	0	EXON	-	fatty acid biosynthetic process ; GO:0006633 | inferred from sequence or structural similarity with UniProtKB:Q9BW60 <newline> very long-chain fatty acid metabolic process ; GO:0000038 | inferred from sequence or structural similarity with UniProtKB:Q9BW60 <newline> fatty acid elongation ; GO:0030497 | inferred from sequence or structural similarity with bond	integral component of membrane ; GO:0016021 | inferred from electronic annotation with InterPro:IPR002076 <newline> cellular_component ; GO:0005575 | no biological data available	fatty acid elongase activity ; GO:0009922 | inferred from sequence or structural similarity with bond	Hsap\ELOVL7 <newline> Hsap\ELOVL1 <newline> Hsap\ELOVL4 <newline> Hsap\ELOVL5 <newline> Hsap\ELOVL2
Bica_I	3R_291155_SNP	N	1.1e-06	0.049	Intergenic
Bica_I	3R_301038_SNP	N	5.94e-08	0.049	FBgn0051523	CG31523	CG31523	0	EXON	-	fatty acid biosynthetic process ; GO:0006633 | inferred from sequence or structural similarity with UniProtKB:Q9BW60 <newline> very long-chain fatty acid metabolic process ; GO:0000038 | inferred from sequence or structural similarity with UniProtKB:Q9BW60 <newline> fatty acid elongation ; GO:0030497 | inferred from sequence or structural similarity with bond	integral component of membrane ; GO:0016021 | inferred from electronic annotation with InterPro:IPR002076 <newline> cellular_component ; GO:0005575 | no biological data available	fatty acid elongase activity ; GO:0009922 | inferred from sequence or structural similarity with bond	Hsap\ELOVL7 <newline> Hsap\ELOVL1 <newline> Hsap\ELOVL4 <newline> Hsap\ELOVL5 <newline> Hsap\ELOVL2
Bica_I	3R_302760_SNP	N	8.08e-08	0.049	FBgn0051523	CG31523	CG31523	0	INTRON	-	fatty acid biosynthetic process ; GO:0006633 | inferred from sequence or structural similarity with UniProtKB:Q9BW60 <newline> very long-chain fatty acid metabolic process ; GO:0000038 | inferred from sequence or structural similarity with UniProtKB:Q9BW60 <newline> fatty acid elongation ; GO:0030497 | inferred from sequence or structural similarity with bond	integral component of membrane ; GO:0016021 | inferred from electronic annotation with InterPro:IPR002076 <newline> cellular_component ; GO:0005575 | no biological data available	fatty acid elongase activity ; GO:0009922 | inferred from sequence or structural similarity with bond	Hsap\ELOVL7 <newline> Hsap\ELOVL1 <newline> Hsap\ELOVL4 <newline> Hsap\ELOVL5 <newline> Hsap\ELOVL2
Bica_I	3R_332708_INS	N	1.69e-07	0.049	FBgn0085386	CG34357	CG34357	0	INTRON	-	cGMP biosynthetic process ; GO:0006182 | inferred from sequence or structural similarity with MGD:Gucy2c; MGI:MGI:106903 <newline> protein phosphorylation ; GO:0006468 | inferred from electronic annotation with InterPro:IPR000719, InterPro:IPR001245 <newline> intracellular signal transduction ; GO:0035556 | inferred from electronic annotation with InterPro:IPR001054, InterPro:IPR018297	cellular_component ; GO:0005575 | no biological data available	guanylate cyclase activity ; GO:0004383 | inferred from sequence or structural similarity with MGD:Gucy2c; MGI:MGI:106903 <newline> ATP binding ; GO:0005524 | inferred from electronic annotation with InterPro:IPR000719 <newline> protein kinase activity ; GO:0004672 | inferred from electronic annotation with InterPro:IPR000719, InterPro:IPR001245	Hsap\NPR1 <newline> Hsap\NPR2
Bica_I	3R_332708_INS	N	1.69e-07	0.049	FBgn0085454	CG34425	CG34425	621	5PRIME	-	biological_process ; GO:0008150 | no biological data available	cellular_component ; GO:0005575 | no biological data available	molecular_function ; GO:0003674 | no biological data available	-
Bica_I	3R_332710_MNP	N	1.06e-06	0.049	FBgn0085386	CG34357	CG34357	0	INTRON	-	cGMP biosynthetic process ; GO:0006182 | inferred from sequence or structural similarity with MGD:Gucy2c; MGI:MGI:106903 <newline> protein phosphorylation ; GO:0006468 | inferred from electronic annotation with InterPro:IPR000719, InterPro:IPR001245 <newline> intracellular signal transduction ; GO:0035556 | inferred from electronic annotation with InterPro:IPR001054, InterPro:IPR018297	cellular_component ; GO:0005575 | no biological data available	guanylate cyclase activity ; GO:0004383 | inferred from sequence or structural similarity with MGD:Gucy2c; MGI:MGI:106903 <newline> ATP binding ; GO:0005524 | inferred from electronic annotation with InterPro:IPR000719 <newline> protein kinase activity ; GO:0004672 | inferred from electronic annotation with InterPro:IPR000719, InterPro:IPR001245	Hsap\NPR1 <newline> Hsap\NPR2
Bica_I	3R_332710_MNP	N	1.06e-06	0.049	FBgn0085454	CG34425	CG34425	623	5PRIME	-	biological_process ; GO:0008150 | no biological data available	cellular_component ; GO:0005575 | no biological data available	molecular_function ; GO:0003674 | no biological data available	-
Bica_I	3R_343034_SNP	N	2.56e-07	0.049	FBgn0085386	CG34357	CG34357	0	INTRON	-	cGMP biosynthetic process ; GO:0006182 | inferred from sequence or structural similarity with MGD:Gucy2c; MGI:MGI:106903 <newline> protein phosphorylation ; GO:0006468 | inferred from electronic annotation with InterPro:IPR000719, InterPro:IPR001245 <newline> intracellular signal transduction ; GO:0035556 | inferred from electronic annotation with InterPro:IPR001054, InterPro:IPR018297	cellular_component ; GO:0005575 | no biological data available	guanylate cyclase activity ; GO:0004383 | inferred from sequence or structural similarity with MGD:Gucy2c; MGI:MGI:106903 <newline> ATP binding ; GO:0005524 | inferred from electronic annotation with InterPro:IPR000719 <newline> protein kinase activity ; GO:0004672 | inferred from electronic annotation with InterPro:IPR000719, InterPro:IPR001245	Hsap\NPR1 <newline> Hsap\NPR2
Bica_I	3R_356853_SNP	N	2.76e-07	0.049	FBgn0085386	CG34357	CG34357	0	INTRON	-	cGMP biosynthetic process ; GO:0006182 | inferred from sequence or structural similarity with MGD:Gucy2c; MGI:MGI:106903 <newline> protein phosphorylation ; GO:0006468 | inferred from electronic annotation with InterPro:IPR000719, InterPro:IPR001245 <newline> intracellular signal transduction ; GO:0035556 | inferred from electronic annotation with InterPro:IPR001054, InterPro:IPR018297	cellular_component ; GO:0005575 | no biological data available	guanylate cyclase activity ; GO:0004383 | inferred from sequence or structural similarity with MGD:Gucy2c; MGI:MGI:106903 <newline> ATP binding ; GO:0005524 | inferred from electronic annotation with InterPro:IPR000719 <newline> protein kinase activity ; GO:0004672 | inferred from electronic annotation with InterPro:IPR000719, InterPro:IPR001245	Hsap\NPR1 <newline> Hsap\NPR2
Bica_I	3R_359126_SNP	N	8.79e-07	0.049	FBgn0051526	CG31526	CG31526	0	EXON	+	biological_process ; GO:0008150 | no biological data available	cellular_component ; GO:0005575 | no biological data available	molecular_function ; GO:0003674 | no biological data available	-
Bica_I	3R_359126_SNP	N	8.79e-07	0.049	FBgn0085386	CG34357	CG34357	0	INTRON	-	cGMP biosynthetic process ; GO:0006182 | inferred from sequence or structural similarity with MGD:Gucy2c; MGI:MGI:106903 <newline> protein phosphorylation ; GO:0006468 | inferred from electronic annotation with InterPro:IPR000719, InterPro:IPR001245 <newline> intracellular signal transduction ; GO:0035556 | inferred from electronic annotation with InterPro:IPR001054, InterPro:IPR018297	cellular_component ; GO:0005575 | no biological data available	guanylate cyclase activity ; GO:0004383 | inferred from sequence or structural similarity with MGD:Gucy2c; MGI:MGI:106903 <newline> ATP binding ; GO:0005524 | inferred from electronic annotation with InterPro:IPR000719 <newline> protein kinase activity ; GO:0004672 | inferred from electronic annotation with InterPro:IPR000719, InterPro:IPR001245	Hsap\NPR1 <newline> Hsap\NPR2
Bica_I	3R_384354_SNP	N	1.18e-07	0.049	FBgn0085386	CG34357	CG34357	565	5PRIME	-	cGMP biosynthetic process ; GO:0006182 | inferred from sequence or structural similarity with MGD:Gucy2c; MGI:MGI:106903 <newline> protein phosphorylation ; GO:0006468 | inferred from electronic annotation with InterPro:IPR000719, InterPro:IPR001245 <newline> intracellular signal transduction ; GO:0035556 | inferred from electronic annotation with InterPro:IPR001054, InterPro:IPR018297	cellular_component ; GO:0005575 | no biological data available	guanylate cyclase activity ; GO:0004383 | inferred from sequence or structural similarity with MGD:Gucy2c; MGI:MGI:106903 <newline> ATP binding ; GO:0005524 | inferred from electronic annotation with InterPro:IPR000719 <newline> protein kinase activity ; GO:0004672 | inferred from electronic annotation with InterPro:IPR000719, InterPro:IPR001245	Hsap\NPR1 <newline> Hsap\NPR2
Bica_I	3R_385980_SNP	N	3.12e-07	0.049	Intergenic
Bica_I	3R_388171_SNP	N	2.55e-07	0.049	Intergenic
Bica_I	3R_388171_SNP	N	2.55e-07	0.049	Intergenic
Bica_I	3R_415058_SNP	N	1.07e-07	0.049	FBgn0267118	CR45558	CR45558	28	5PRIME	-	-	-	-	-
Bica_I	3R_441625_SNP	N	6.29e-07	0.049	FBgn0087012	5-HT2A	5-hydroxytryptamine (serotonin) receptor 2A	0	INTRON	+	germ-band extension ; GO:0007377 | inferred from mutant phenotype <newline> serotonin receptor signaling pathway ; GO:0007210 | non-traceable author statement <newline> serotonin receptor signaling pathway ; GO:0007210 | traceable author statement <newline> serotonin receptor signaling pathway ; GO:0007210 | inferred from sequence or structural similarity <newline> serotonin receptor signaling pa…	plasma membrane ; GO:0005886 | inferred from direct assay AND inferred from sequence or structural similarity <newline> plasma membrane ; GO:0005886 | non-traceable author statement <newline> integral component of membrane ; GO:0016021 | inferred from sequence or structural similarity <newline> integral component of membrane ; GO:0016021 | inferred from electronic annotation with InterPro:IPR0002…	serotonin receptor activity ; GO:0004993 | non-traceable author statement <newline> Gq/11-coupled serotonin receptor activity ; GO:0001587 | non-traceable author statement <newline> serotonin receptor activity ; GO:0004993 | traceable author statement <newline> G-protein coupled amine receptor activity ; GO:0008227 | inferred from sequence or structural similarity <newline> serotonin receptor act…	-
Bica_I	3R_441625_SNP	N	6.29e-07	0.049	Intergenic
Bica_I	3R_448504_SNP	N	2.45e-07	0.049	FBgn0087012	5-HT2A	5-hydroxytryptamine (serotonin) receptor 2A	0	EXON	+	germ-band extension ; GO:0007377 | inferred from mutant phenotype <newline> serotonin receptor signaling pathway ; GO:0007210 | non-traceable author statement <newline> serotonin receptor signaling pathway ; GO:0007210 | traceable author statement <newline> serotonin receptor signaling pathway ; GO:0007210 | inferred from sequence or structural similarity <newline> serotonin receptor signaling pa…	plasma membrane ; GO:0005886 | inferred from direct assay AND inferred from sequence or structural similarity <newline> plasma membrane ; GO:0005886 | non-traceable author statement <newline> integral component of membrane ; GO:0016021 | inferred from sequence or structural similarity <newline> integral component of membrane ; GO:0016021 | inferred from electronic annotation with InterPro:IPR0002…	serotonin receptor activity ; GO:0004993 | non-traceable author statement <newline> Gq/11-coupled serotonin receptor activity ; GO:0001587 | non-traceable author statement <newline> serotonin receptor activity ; GO:0004993 | traceable author statement <newline> G-protein coupled amine receptor activity ; GO:0008227 | inferred from sequence or structural similarity <newline> serotonin receptor act…	-
Bica_I	3R_448504_SNP	N	2.45e-07	0.049	Intergenic
Bica_I	3R_451205_SNP	N	1.04e-06	0.049	FBgn0087012	5-HT2A	5-hydroxytryptamine (serotonin) receptor 2A	0	INTRON	+	germ-band extension ; GO:0007377 | inferred from mutant phenotype <newline> serotonin receptor signaling pathway ; GO:0007210 | non-traceable author statement <newline> serotonin receptor signaling pathway ; GO:0007210 | traceable author statement <newline> serotonin receptor signaling pathway ; GO:0007210 | inferred from sequence or structural similarity <newline> serotonin receptor signaling pa…	plasma membrane ; GO:0005886 | inferred from direct assay AND inferred from sequence or structural similarity <newline> plasma membrane ; GO:0005886 | non-traceable author statement <newline> integral component of membrane ; GO:0016021 | inferred from sequence or structural similarity <newline> integral component of membrane ; GO:0016021 | inferred from electronic annotation with InterPro:IPR0002…	serotonin receptor activity ; GO:0004993 | non-traceable author statement <newline> Gq/11-coupled serotonin receptor activity ; GO:0001587 | non-traceable author statement <newline> serotonin receptor activity ; GO:0004993 | traceable author statement <newline> G-protein coupled amine receptor activity ; GO:0008227 | inferred from sequence or structural similarity <newline> serotonin receptor act…	-
Bica_I	3R_451205_SNP	N	1.04e-06	0.049	Intergenic
Bica_I	3R_460299_SNP	N	3.17e-07	0.049	FBgn0267233	CR45673	CR45673	398	5PRIME	+	-	-	-	-
Bica_I	3R_460299_SNP	N	3.17e-07	0.049	Intergenic
Bica_I	3R_460810_SNP	N	3.76e-07	0.049	FBgn0267233	CR45673	CR45673	0	EXON	+	-	-	-	-
Bica_I	3R_460810_SNP	N	3.76e-07	0.049	Intergenic
Bica_I	3R_469166_SNP	N	1.29e-07	0.049	FBgn0037262	MED31	Mediator complex subunit 31	152	3PRIME	+	transcription initiation from RNA polymerase II promoter ; GO:0006367 | inferred from sequence or structural similarity <newline> transcription initiation from RNA polymerase II promoter ; GO:0006367 | inferred from direct assay <newline> regulation of transcription from RNA polymerase II promoter ; GO:0006357 | inferred from direct assay <newline> anterior/posterior axis specification, embryo ; …	mediator complex ; GO:0016592 | inferred from sequence or structural similarity <newline> mediator complex ; GO:0016592 | inferred from direct assay <newline> nucleus ; GO:0005634 | inferred from direct assay	transcription coactivator activity ; GO:0003713 | contributes_to inferred from direct assay <newline> RNA polymerase II transcription cofactor activity ; GO:0001104 | inferred from sequence or structural similarity <newline> RNA polymerase II transcription cofactor activity ; GO:0001104 | inferred from electronic annotation with InterPro:IPR008831	Hsap\MED31
Bica_I	3R_469166_SNP	N	1.29e-07	0.049	FBgn0037263	slx1	nuclease slx1	0	INTRON	+	mitotic G2 DNA damage checkpoint ; GO:0007095 | inferred from mutant phenotype <newline> DNA repair ; GO:0006281 | inferred from electronic annotation with InterPro:IPR027520	Slx1-Slx4 complex ; GO:0033557 | inferred from sequence or structural similarity with SGD_LOCUS:SLX1; SGD:S000000432	protein binding ; GO:0005515 | inferred from physical interaction with mus312 <newline> endodeoxyribonuclease activity ; GO:0004520 | inferred from sequence or structural similarity with SGD_LOCUS:SLX1; SGD:S000000432 <newline> 5'-flap endonuclease activity ; GO:0017108 | inferred from electronic annotation with InterPro:IPR027520	Hsap\ENSG00000181625
Bica_I	3R_480585_SNP	N	2.98e-07	0.049	FBgn0037265	spartin	spartin	0	EXON	+	negative regulation of synaptic growth at neuromuscular junction ; GO:0045886 | inferred from mutant phenotype <newline> neuromuscular synaptic transmission ; GO:0007274 | inferred from mutant phenotype <newline> negative regulation of BMP signaling pathway ; GO:0030514 | inferred from genetic interaction with wit	presynaptic membrane ; GO:0042734 | inferred from direct assay <newline> terminal bouton ; GO:0043195 | inferred from direct assay <newline> plasma membrane ; GO:0005886 | inferred from direct assay <newline> early endosome ; GO:0005769 | inferred from direct assay	molecular_function ; GO:0003674 | no biological data available	Hsap\SPG20
Bica_I	3R_480585_SNP	N	2.98e-07	0.049	FBgn0087013	Karybeta3	Karyopherin beta 3	239	3PRIME	+	protein import into nucleus ; GO:0006606 | inferred from sequence or structural similarity	nuclear pore ; GO:0005643 | inferred from sequence or structural similarity <newline> cytosol ; GO:0005829 | inferred from direct assay <newline> microtubule associated complex ; GO:0005875 | inferred from direct assay	protein transmembrane transporter activity ; GO:0008320 | inferred from sequence or structural similarity	Hsap\RANBP6 <newline> Hsap\ENSG00000065150
Bica_I	3R_486091_SNP	N	1.7e-06	0.049	FBgn0263346	CG43427	CG43427	0	EXON	+	imaginal disc-derived wing morphogenesis ; GO:0007476 | inferred from mutant phenotype	cellular_component ; GO:0005575 | no biological data available	molecular_function ; GO:0003674 | no biological data available <newline> zinc ion binding ; GO:0008270 | inferred from electronic annotation with InterPro:IPR001781	-
Bica_I	3R_486091_SNP	N	1.7e-06	0.049	FBgn0265039	CR44156	CR44156	158	3PRIME	-	-	-	-	-
Bica_I	3R_487210_SNP	N	2.13e-08	0.049	FBgn0263346	CG43427	CG43427	0	INTRON	+	imaginal disc-derived wing morphogenesis ; GO:0007476 | inferred from mutant phenotype	cellular_component ; GO:0005575 | no biological data available	molecular_function ; GO:0003674 | no biological data available <newline> zinc ion binding ; GO:0008270 | inferred from electronic annotation with InterPro:IPR001781	-
Bica_I	3R_487210_SNP	N	2.13e-08	0.049	FBgn0265039	CR44156	CR44156	549	5PRIME	-	-	-	-	-
Bica_I	3R_487210_SNP	N	2.13e-08	0.049	Intergenic
Bica_I	3R_487587_SNP	N	5.36e-08	0.049	FBgn0263346	CG43427	CG43427	0	INTRON	+	imaginal disc-derived wing morphogenesis ; GO:0007476 | inferred from mutant phenotype	cellular_component ; GO:0005575 | no biological data available	molecular_function ; GO:0003674 | no biological data available <newline> zinc ion binding ; GO:0008270 | inferred from electronic annotation with InterPro:IPR001781	-
Bica_I	3R_487587_SNP	N	5.36e-08	0.049	FBgn0265039	CR44156	CR44156	926	5PRIME	-	-	-	-	-
Bica_I	3R_487587_SNP	N	5.36e-08	0.049	Intergenic
Bica_I	3R_487587_SNP	N	5.36e-08	0.049	Intergenic
Bica_I	3R_494097_SNP	N	1.92e-07	0.049	FBgn0263346	CG43427	CG43427	0	INTRON	+	imaginal disc-derived wing morphogenesis ; GO:0007476 | inferred from mutant phenotype	cellular_component ; GO:0005575 | no biological data available	molecular_function ; GO:0003674 | no biological data available <newline> zinc ion binding ; GO:0008270 | inferred from electronic annotation with InterPro:IPR001781	-
Bica_I	3R_494097_SNP	N	1.92e-07	0.049	XLOC_019586			0	EXON	+
Bica_I	3R_494097_SNP	N	1.92e-07	0.049	Intergenic
Bica_I	3R_498259_SNP	N	1.3e-06	0.049	FBgn0263346	CG43427	CG43427	0	INTRON	+	imaginal disc-derived wing morphogenesis ; GO:0007476 | inferred from mutant phenotype	cellular_component ; GO:0005575 | no biological data available	molecular_function ; GO:0003674 | no biological data available <newline> zinc ion binding ; GO:0008270 | inferred from electronic annotation with InterPro:IPR001781	-
Bica_I	3R_498259_SNP	N	1.3e-06	0.049	Intergenic
Bica_I	3R_498795_SNP	N	1.12e-06	0.049	FBgn0263346	CG43427	CG43427	0	INTRON	+	imaginal disc-derived wing morphogenesis ; GO:0007476 | inferred from mutant phenotype	cellular_component ; GO:0005575 | no biological data available	molecular_function ; GO:0003674 | no biological data available <newline> zinc ion binding ; GO:0008270 | inferred from electronic annotation with InterPro:IPR001781	-
Bica_I	3R_498795_SNP	N	1.12e-06	0.049	FBgn0265040	CR44157	CR44157	904	5PRIME	+	-	-	-	-
Bica_I	3R_498795_SNP	N	1.12e-06	0.049	Intergenic
Bica_I	3R_501546_SNP	N	1.9e-06	0.049	FBgn0263346	CG43427	CG43427	0	INTRON	+	imaginal disc-derived wing morphogenesis ; GO:0007476 | inferred from mutant phenotype	cellular_component ; GO:0005575 | no biological data available	molecular_function ; GO:0003674 | no biological data available <newline> zinc ion binding ; GO:0008270 | inferred from electronic annotation with InterPro:IPR001781	-
Bica_I	3R_501546_SNP	N	1.9e-06	0.049	Intergenic
Bica_I	3R_505890_SNP	N	2.66e-07	0.049	FBgn0263346	CG43427	CG43427	0	INTRON	+	imaginal disc-derived wing morphogenesis ; GO:0007476 | inferred from mutant phenotype	cellular_component ; GO:0005575 | no biological data available	molecular_function ; GO:0003674 | no biological data available <newline> zinc ion binding ; GO:0008270 | inferred from electronic annotation with InterPro:IPR001781	-
Bica_I	3R_512906_SNP	N	6.82e-07	0.049	FBgn0263346	CG43427	CG43427	0	INTRON	+	imaginal disc-derived wing morphogenesis ; GO:0007476 | inferred from mutant phenotype	cellular_component ; GO:0005575 | no biological data available	molecular_function ; GO:0003674 | no biological data available <newline> zinc ion binding ; GO:0008270 | inferred from electronic annotation with InterPro:IPR001781	-
Bica_I	3R_512906_SNP	N	6.82e-07	0.049	XLOC_019588			0	EXON	+
Bica_I	3R_529970_SNP	N	3.2e-08	0.049	FBgn0263346	CG43427	CG43427	0	EXON	+	imaginal disc-derived wing morphogenesis ; GO:0007476 | inferred from mutant phenotype	cellular_component ; GO:0005575 | no biological data available	molecular_function ; GO:0003674 | no biological data available <newline> zinc ion binding ; GO:0008270 | inferred from electronic annotation with InterPro:IPR001781	-
Bica_I	3R_532481_SNP	N	4.46e-07	0.049	FBgn0263346	CG43427	CG43427	0	INTRON	+	imaginal disc-derived wing morphogenesis ; GO:0007476 | inferred from mutant phenotype	cellular_component ; GO:0005575 | no biological data available	molecular_function ; GO:0003674 | no biological data available <newline> zinc ion binding ; GO:0008270 | inferred from electronic annotation with InterPro:IPR001781	-
Bica_I	3R_548114_SNP	N	7.49e-07	0.049	FBgn0027570	Nep2	Neprilysin 2	0	INTRON	-	proteolysis ; GO:0006508 | inferred from direct assay	extracellular space ; GO:0005615 | inferred from direct assay	metallopeptidase activity ; GO:0008237 | inferred from sequence or structural similarity with HGNC_gene:ECE1; HGNC:3146; OMIM:600423 AND inferred from sequence or structural similarity with HGNC_gene:MME; HGNC:7154; OMIM:120520 <newline> metalloendopeptidase activity ; GO:0004222 | inferred from sequence or structural similarity with UniProtKB:P42892 <newline> metalloendopeptidase activity ; GO:0…	Hsap\ECE1 <newline> Hsap\MMEL1 <newline> Hsap\ECEL1 <newline> Hsap\ECE2 <newline> Hsap\MME <newline> Hsap\PHEX
Bica_I	3R_548114_SNP	N	7.49e-07	0.049	Intergenic
Bica_I	3R_548114_SNP	N	7.49e-07	0.049	XLOC_022933			0	EXON	-
Bica_I	3R_561795_DEL	N	3.54e-07	0.049	FBgn0026620	tacc	transforming acidic coiled-coil protein	0	INTRON	-	negative regulation of microtubule depolymerization ; GO:0007026 | non-traceable author statement <newline> microtubule cytoskeleton organization ; GO:0000226 | inferred from mutant phenotype <newline> mitosis ; GO:0007067 | inferred from mutant phenotype <newline> nuclear migration ; GO:0007097 | inferred from mutant phenotype <newline> pronuclear migration ; GO:0035046 | inferred from mutant ph…	centrosome ; GO:0005813 | inferred from direct assay <newline> astral microtubule ; GO:0000235 | traceable author statement <newline> centrosome ; GO:0005813 | traceable author statement <newline> spindle microtubule ; GO:0005876 | traceable author statement <newline> pericentriolar material ; GO:0000242 | non-traceable author statement <newline> spindle pole ; GO:0000922 | inferred from direct a…	microtubule binding ; GO:0008017 | traceable author statement <newline> protein binding ; GO:0005515 | inferred from physical interaction with msps	-
Bica_I	3R_564889_DEL	N	5.63e-07	0.049	FBgn0026620	tacc	transforming acidic coiled-coil protein	0	INTRON	-	negative regulation of microtubule depolymerization ; GO:0007026 | non-traceable author statement <newline> microtubule cytoskeleton organization ; GO:0000226 | inferred from mutant phenotype <newline> mitosis ; GO:0007067 | inferred from mutant phenotype <newline> nuclear migration ; GO:0007097 | inferred from mutant phenotype <newline> pronuclear migration ; GO:0035046 | inferred from mutant ph…	centrosome ; GO:0005813 | inferred from direct assay <newline> astral microtubule ; GO:0000235 | traceable author statement <newline> centrosome ; GO:0005813 | traceable author statement <newline> spindle microtubule ; GO:0005876 | traceable author statement <newline> pericentriolar material ; GO:0000242 | non-traceable author statement <newline> spindle pole ; GO:0000922 | inferred from direct a…	microtubule binding ; GO:0008017 | traceable author statement <newline> protein binding ; GO:0005515 | inferred from physical interaction with msps	-
Bica_I	3R_564889_DEL	N	5.63e-07	0.049	Intergenic
Bica_I	3R_564889_DEL	N	5.63e-07	0.049	Intergenic
Bica_I	3R_584361_SNP	Y	1.61e-08	0.049	FBgn0010750	atms	antimeros	0	INTRON	+	positive regulation of transcription, DNA-templated ; GO:0045893 | inferred from mutant phenotype <newline> neurogenesis ; GO:0022008 | inferred from mutant phenotype	transcriptionally active chromatin ; GO:0035327 | inferred from direct assay <newline> Cdc73/Paf1 complex ; GO:0016593 | inferred from direct assay	kinesin binding ; GO:0019894 | inferred from direct assay	Hsap\PAF1
Bica_I	3R_584361_SNP	N	1.61e-08	0.049	FBgn0264907	CG44098	CG44098	0	INTRON	-	organic cation transport ; GO:0015695 | inferred from sequence or structural similarity with EMBL:AF055286 <newline> transmembrane transport ; GO:0055085 | inferred from electronic annotation with InterPro:IPR005828, InterPro:IPR011701	integral component of membrane ; GO:0016021 | inferred from electronic annotation with InterPro:IPR005828, InterPro:IPR011701	secondary active organic cation transmembrane transporter activity ; GO:0008513 | inferred from sequence or structural similarity with EMBL:AF055286	-
Bica_I	3R_584361_SNP	N	1.61e-08	0.049	XLOC_022938			0	EXON	-
Bica_I	3R_592321_SNP	N	7.29e-07	0.049	FBgn0010750	atms	antimeros	0	INTRON	+	positive regulation of transcription, DNA-templated ; GO:0045893 | inferred from mutant phenotype <newline> neurogenesis ; GO:0022008 | inferred from mutant phenotype	transcriptionally active chromatin ; GO:0035327 | inferred from direct assay <newline> Cdc73/Paf1 complex ; GO:0016593 | inferred from direct assay	kinesin binding ; GO:0019894 | inferred from direct assay	Hsap\PAF1
Bica_I	3R_592321_SNP	N	7.29e-07	0.049	FBgn0264907	CG44098	CG44098	0	INTRON	-	organic cation transport ; GO:0015695 | inferred from sequence or structural similarity with EMBL:AF055286 <newline> transmembrane transport ; GO:0055085 | inferred from electronic annotation with InterPro:IPR005828, InterPro:IPR011701	integral component of membrane ; GO:0016021 | inferred from electronic annotation with InterPro:IPR005828, InterPro:IPR011701	secondary active organic cation transmembrane transporter activity ; GO:0008513 | inferred from sequence or structural similarity with EMBL:AF055286	-
Bica_I	3R_598766_SNP	N	6.17e-07	0.049	FBgn0010750	atms	antimeros	0	INTRON	+	positive regulation of transcription, DNA-templated ; GO:0045893 | inferred from mutant phenotype <newline> neurogenesis ; GO:0022008 | inferred from mutant phenotype	transcriptionally active chromatin ; GO:0035327 | inferred from direct assay <newline> Cdc73/Paf1 complex ; GO:0016593 | inferred from direct assay	kinesin binding ; GO:0019894 | inferred from direct assay	Hsap\PAF1
Bica_I	3R_598766_SNP	N	6.17e-07	0.049	FBgn0264907	CG44098	CG44098	0	EXON	-	organic cation transport ; GO:0015695 | inferred from sequence or structural similarity with EMBL:AF055286 <newline> transmembrane transport ; GO:0055085 | inferred from electronic annotation with InterPro:IPR005828, InterPro:IPR011701	integral component of membrane ; GO:0016021 | inferred from electronic annotation with InterPro:IPR005828, InterPro:IPR011701	secondary active organic cation transmembrane transporter activity ; GO:0008513 | inferred from sequence or structural similarity with EMBL:AF055286	-
Bica_I	3R_607932_SNP	N	3.9e-07	0.049	FBgn0037276	CG17387	CG17387	0	INTRON	-	-	-	-	Hsap\CCDC39
Bica_I	3R_622414_SNP	N	7.87e-07	0.049	FBgn0260794	ctrip	circadian trip	0	EXON	-	neurogenesis ; GO:0022008 | inferred from mutant phenotype <newline> regulation of circadian rhythm ; GO:0042752 | inferred from mutant phenotype	-	ligand-dependent nuclear receptor binding ; GO:0016922 | inferred from sequence or structural similarity with UniProtKB:Q14669 <newline> zinc ion binding ; GO:0008270 | inferred from electronic annotation with InterPro:IPR018123 <newline> ubiquitin-protein ligase activity ; GO:0004842 | inferred from electronic annotation with InterPro:IPR000569	Hsap\TRIP12
Bica_I	3R_622414_SNP	N	7.87e-07	0.049	XLOC_022943			261	5PRIME	-
Bica_I	3R_1949755_SNP	N	1.91e-07	0.049	FBgn0037402	Vha14-2	Vacuolar H[+] ATPase 14kD subunit 2	0	EXON	+	ATP hydrolysis coupled proton transport ; GO:0015991 | inferred from electronic annotation with InterPro:IPR005772, InterPro:IPR008218 <newline> ATP hydrolysis coupled proton transport ; GO:0015991 | inferred by curator from GO:0033176	vacuolar proton-transporting V-type ATPase, V1 domain ; GO:0000221 | inferred from sequence or structural similarity with UniProtKB:P31478 <newline> vacuolar proton-transporting V-type ATPase, V1 domain ; GO:0000221 | non-traceable author statement <newline> proton-transporting V-type ATPase complex ; GO:0033176 | inferred from sequence or structural similarity with Vha14-1	proton-transporting ATPase activity, rotational mechanism ; GO:0046961 | inferred from electronic annotation with InterPro:IPR005772, InterPro:IPR008218 <newline> proton-transporting ATPase activity, rotational mechanism ; GO:0046961 | contributes_to inferred by curator from GO:0033176	Hsap\ATP6V1F
Bica_I	3L_12900824_SNP	N	8.36e-07	0.049	Intergenic
Bica_I	3L_12900824_SNP	N	8.36e-07	0.049	Intergenic
Bica_I	3L_22971632_SNP	N	1.68e-06	0.049	Intergenic
Bica_I	3L_22971632_SNP	N	1.68e-06	0.049	Intergenic
Bica_I	3L_23208158_SNP	N	2.01e-06	0.049	FBgn0266347	nAChRalpha4	nicotinic Acetylcholine Receptor alpha4	0	INTRON	+	ion transport ; GO:0006811 | inferred from electronic annotation with InterPro:IPR002394, InterPro:IPR006029, InterPro:IPR006201, InterPro:IPR018000 <newline> sleep ; GO:0030431 | inferred from mutant phenotype	acetylcholine-gated channel complex ; GO:0005892 | inferred from sequence or structural similarity <newline> acetylcholine-gated channel complex ; GO:0005892 | inferred from direct assay <newline> acetylcholine-gated channel complex ; GO:0005892 | inferred from sequence or structural similarity with EMBL:AJ000390; protein_id:CAA04052 <newline> postsynaptic membrane ; GO:0045211 | inferred from el…	acetylcholine-activated cation-selective channel activity ; GO:0004889 | inferred from sequence or structural similarity <newline> acetylcholine receptor activity ; GO:0015464 | inferred from direct assay contributes_to <newline> acetylcholine-activated cation-selective channel activity ; GO:0004889 | inferred from sequence or structural similarity with EMBL:AJ000390; protein_id:CAA04052	Hsap\CHRNA9 <newline> Hsap\CHRFAM7A <newline> Hsap\CHRNA5 <newline> Hsap\ENSG00000080644 <newline> Hsap\CHRNA1 <newline> Hsap\CHRNA6 <newline> Hsap\CHRNB4 <newline> Hsap\CHRNA7 <newline> Hsap\CHRNA2 <newline> Hsap\CHRNB2 <newline> Hsap\CHRNA4 <newline> Hsap\CHRNA10
Bica_I	3L_23208158_SNP	N	2.01e-06	0.049	XLOC_015398			243	3PRIME	+
Bica_I	3L_23208158_SNP	N	2.01e-06	0.049	XLOC_015399			34	5PRIME	+
Bica_I	3L_23234405_INS	N	8.5e-07	0.049	FBgn0266347	nAChRalpha4	nicotinic Acetylcholine Receptor alpha4	0	INTRON	+	ion transport ; GO:0006811 | inferred from electronic annotation with InterPro:IPR002394, InterPro:IPR006029, InterPro:IPR006201, InterPro:IPR018000 <newline> sleep ; GO:0030431 | inferred from mutant phenotype	acetylcholine-gated channel complex ; GO:0005892 | inferred from sequence or structural similarity <newline> acetylcholine-gated channel complex ; GO:0005892 | inferred from direct assay <newline> acetylcholine-gated channel complex ; GO:0005892 | inferred from sequence or structural similarity with EMBL:AJ000390; protein_id:CAA04052 <newline> postsynaptic membrane ; GO:0045211 | inferred from el…	acetylcholine-activated cation-selective channel activity ; GO:0004889 | inferred from sequence or structural similarity <newline> acetylcholine receptor activity ; GO:0015464 | inferred from direct assay contributes_to <newline> acetylcholine-activated cation-selective channel activity ; GO:0004889 | inferred from sequence or structural similarity with EMBL:AJ000390; protein_id:CAA04052	Hsap\CHRNA9 <newline> Hsap\CHRFAM7A <newline> Hsap\CHRNA5 <newline> Hsap\ENSG00000080644 <newline> Hsap\CHRNA1 <newline> Hsap\CHRNA6 <newline> Hsap\CHRNB4 <newline> Hsap\CHRNA7 <newline> Hsap\CHRNA2 <newline> Hsap\CHRNB2 <newline> Hsap\CHRNA4 <newline> Hsap\CHRNA10
Bica_I	3L_23310450_SNP	N	1.85e-06	0.049	XLOC_015420			0	INTRON	+
Bica_I	3L_23320980_SNP	Y	4.6e-07	0.049	FBgn0010215	alpha-Cat	alpha Catenin	0	INTRON	-	cytoskeletal anchoring at plasma membrane ; GO:0007016 | inferred from sequence or structural similarity <newline> oocyte localization involved in germarium-derived egg chamber formation ; GO:0030720 | traceable author statement <newline> establishment or maintenance of cell polarity ; GO:0007163 | non-traceable author statement <newline> cell adhesion ; GO:0007155 | non-traceable author statemen…	catenin complex ; GO:0016342 | inferred from sequence or structural similarity <newline> zonula adherens ; GO:0005915 | non-traceable author statement <newline> spot adherens junction ; GO:0005914 | non-traceable author statement <newline> adherens junction ; GO:0005912 | non-traceable author statement <newline> cell-substrate junction ; GO:0030055 | non-traceable author statement <newline> cell-…	actin binding ; GO:0003779 | inferred from sequence or structural similarity <newline> cytoskeletal protein binding ; GO:0008092 | inferred from sequence or structural similarity <newline> cadherin binding ; GO:0045296 | non-traceable author statement <newline> cadherin binding ; GO:0045296 | inferred from electronic annotation with InterPro:IPR001033 <newline> structural molecule activity ; GO:0…	Hsap\CTNNA3 <newline> Hsap\ENSG00000066032 <newline> Hsap\CTNNA1
Bica_I	3L_24068501_SNP	N	1.62e-06	0.049	FBgn0011288	Snap25	Synaptosomal-associated protein 25kDa	0	INTRON	+	neurotransmitter secretion ; GO:0007269 | non-traceable author statement <newline> vesicle-mediated transport ; GO:0016192 | non-traceable author statement <newline> Golgi to plasma membrane transport ; GO:0006893 | inferred from sequence or structural similarity <newline> synaptic vesicle docking involved in exocytosis ; GO:0016081 | non-traceable author statement <newline> synaptic transmission…	plasma membrane ; GO:0005886 | non-traceable author statement <newline> synapse ; GO:0045202 | non-traceable author statement <newline> plasma membrane ; GO:0005886 | inferred from direct assay <newline> SNARE complex ; GO:0031201 | inferred from direct assay <newline> terminal bouton ; GO:0043195 | inferred from direct assay	SNAP receptor activity ; GO:0005484 | inferred from sequence or structural similarity <newline> SNAP receptor activity ; GO:0005484 | non-traceable author statement <newline> SNARE binding ; GO:0000149 | inferred from physical interaction with nSyb, Syx1A <newline> SNAP receptor activity ; GO:0005484 | inferred from direct assay <newline> protein binding ; GO:0005515 | inferred from physical inte…	Hsap\SNAP23 <newline> Hsap\SNAP25
Bica_I	3L_24081087_SNP	N	4.7e-07	0.049	FBgn0011288	Snap25	Synaptosomal-associated protein 25kDa	0	INTRON	+	neurotransmitter secretion ; GO:0007269 | non-traceable author statement <newline> vesicle-mediated transport ; GO:0016192 | non-traceable author statement <newline> Golgi to plasma membrane transport ; GO:0006893 | inferred from sequence or structural similarity <newline> synaptic vesicle docking involved in exocytosis ; GO:0016081 | non-traceable author statement <newline> synaptic transmission…	plasma membrane ; GO:0005886 | non-traceable author statement <newline> synapse ; GO:0045202 | non-traceable author statement <newline> plasma membrane ; GO:0005886 | inferred from direct assay <newline> SNARE complex ; GO:0031201 | inferred from direct assay <newline> terminal bouton ; GO:0043195 | inferred from direct assay	SNAP receptor activity ; GO:0005484 | inferred from sequence or structural similarity <newline> SNAP receptor activity ; GO:0005484 | non-traceable author statement <newline> SNARE binding ; GO:0000149 | inferred from physical interaction with nSyb, Syx1A <newline> SNAP receptor activity ; GO:0005484 | inferred from direct assay <newline> protein binding ; GO:0005515 | inferred from physical inte…	Hsap\SNAP23 <newline> Hsap\SNAP25
Bica_I	3L_24081087_SNP	N	4.7e-07	0.049	XLOC_015529			176	5PRIME	+
Bica_I	3L_24081087_SNP	N	4.7e-07	0.049	XLOC_015530			980	5PRIME	+
Bica_I	3L_24081099_SNP	N	1.26e-06	0.049	FBgn0011288	Snap25	Synaptosomal-associated protein 25kDa	0	INTRON	+	neurotransmitter secretion ; GO:0007269 | non-traceable author statement <newline> vesicle-mediated transport ; GO:0016192 | non-traceable author statement <newline> Golgi to plasma membrane transport ; GO:0006893 | inferred from sequence or structural similarity <newline> synaptic vesicle docking involved in exocytosis ; GO:0016081 | non-traceable author statement <newline> synaptic transmission…	plasma membrane ; GO:0005886 | non-traceable author statement <newline> synapse ; GO:0045202 | non-traceable author statement <newline> plasma membrane ; GO:0005886 | inferred from direct assay <newline> SNARE complex ; GO:0031201 | inferred from direct assay <newline> terminal bouton ; GO:0043195 | inferred from direct assay	SNAP receptor activity ; GO:0005484 | inferred from sequence or structural similarity <newline> SNAP receptor activity ; GO:0005484 | non-traceable author statement <newline> SNARE binding ; GO:0000149 | inferred from physical interaction with nSyb, Syx1A <newline> SNAP receptor activity ; GO:0005484 | inferred from direct assay <newline> protein binding ; GO:0005515 | inferred from physical inte…	Hsap\SNAP23 <newline> Hsap\SNAP25
Bica_I	3L_24081099_SNP	N	1.26e-06	0.049	XLOC_015529			164	5PRIME	+
Bica_I	3L_24081099_SNP	N	1.26e-06	0.049	XLOC_015530			968	5PRIME	+
Bica_I	3L_24083568_SNP	N	7.21e-07	0.049	FBgn0011288	Snap25	Synaptosomal-associated protein 25kDa	0	INTRON	+	neurotransmitter secretion ; GO:0007269 | non-traceable author statement <newline> vesicle-mediated transport ; GO:0016192 | non-traceable author statement <newline> Golgi to plasma membrane transport ; GO:0006893 | inferred from sequence or structural similarity <newline> synaptic vesicle docking involved in exocytosis ; GO:0016081 | non-traceable author statement <newline> synaptic transmission…	plasma membrane ; GO:0005886 | non-traceable author statement <newline> synapse ; GO:0045202 | non-traceable author statement <newline> plasma membrane ; GO:0005886 | inferred from direct assay <newline> SNARE complex ; GO:0031201 | inferred from direct assay <newline> terminal bouton ; GO:0043195 | inferred from direct assay	SNAP receptor activity ; GO:0005484 | inferred from sequence or structural similarity <newline> SNAP receptor activity ; GO:0005484 | non-traceable author statement <newline> SNARE binding ; GO:0000149 | inferred from physical interaction with nSyb, Syx1A <newline> SNAP receptor activity ; GO:0005484 | inferred from direct assay <newline> protein binding ; GO:0005515 | inferred from physical inte…	Hsap\SNAP23 <newline> Hsap\SNAP25
Bica_I	3L_24083568_SNP	N	7.21e-07	0.049	Intergenic
Bica_I	3L_24083571_DEL	N	4.49e-07	0.049	FBgn0011288	Snap25	Synaptosomal-associated protein 25kDa	0	INTRON	+	neurotransmitter secretion ; GO:0007269 | non-traceable author statement <newline> vesicle-mediated transport ; GO:0016192 | non-traceable author statement <newline> Golgi to plasma membrane transport ; GO:0006893 | inferred from sequence or structural similarity <newline> synaptic vesicle docking involved in exocytosis ; GO:0016081 | non-traceable author statement <newline> synaptic transmission…	plasma membrane ; GO:0005886 | non-traceable author statement <newline> synapse ; GO:0045202 | non-traceable author statement <newline> plasma membrane ; GO:0005886 | inferred from direct assay <newline> SNARE complex ; GO:0031201 | inferred from direct assay <newline> terminal bouton ; GO:0043195 | inferred from direct assay	SNAP receptor activity ; GO:0005484 | inferred from sequence or structural similarity <newline> SNAP receptor activity ; GO:0005484 | non-traceable author statement <newline> SNARE binding ; GO:0000149 | inferred from physical interaction with nSyb, Syx1A <newline> SNAP receptor activity ; GO:0005484 | inferred from direct assay <newline> protein binding ; GO:0005515 | inferred from physical inte…	Hsap\SNAP23 <newline> Hsap\SNAP25
Bica_I	3L_24083571_DEL	N	4.49e-07	0.049	Intergenic
Bica_I	3L_24104992_SNP	N	6.82e-07	0.049	FBgn0011288	Snap25	Synaptosomal-associated protein 25kDa	0	INTRON	+	neurotransmitter secretion ; GO:0007269 | non-traceable author statement <newline> vesicle-mediated transport ; GO:0016192 | non-traceable author statement <newline> Golgi to plasma membrane transport ; GO:0006893 | inferred from sequence or structural similarity <newline> synaptic vesicle docking involved in exocytosis ; GO:0016081 | non-traceable author statement <newline> synaptic transmission…	plasma membrane ; GO:0005886 | non-traceable author statement <newline> synapse ; GO:0045202 | non-traceable author statement <newline> plasma membrane ; GO:0005886 | inferred from direct assay <newline> SNARE complex ; GO:0031201 | inferred from direct assay <newline> terminal bouton ; GO:0043195 | inferred from direct assay	SNAP receptor activity ; GO:0005484 | inferred from sequence or structural similarity <newline> SNAP receptor activity ; GO:0005484 | non-traceable author statement <newline> SNARE binding ; GO:0000149 | inferred from physical interaction with nSyb, Syx1A <newline> SNAP receptor activity ; GO:0005484 | inferred from direct assay <newline> protein binding ; GO:0005515 | inferred from physical inte…	Hsap\SNAP23 <newline> Hsap\SNAP25
Bica_I	3L_24143356_SNP	N	5.09e-07	0.049	FBgn0011288	Snap25	Synaptosomal-associated protein 25kDa	0	INTRON	+	neurotransmitter secretion ; GO:0007269 | non-traceable author statement <newline> vesicle-mediated transport ; GO:0016192 | non-traceable author statement <newline> Golgi to plasma membrane transport ; GO:0006893 | inferred from sequence or structural similarity <newline> synaptic vesicle docking involved in exocytosis ; GO:0016081 | non-traceable author statement <newline> synaptic transmission…	plasma membrane ; GO:0005886 | non-traceable author statement <newline> synapse ; GO:0045202 | non-traceable author statement <newline> plasma membrane ; GO:0005886 | inferred from direct assay <newline> SNARE complex ; GO:0031201 | inferred from direct assay <newline> terminal bouton ; GO:0043195 | inferred from direct assay	SNAP receptor activity ; GO:0005484 | inferred from sequence or structural similarity <newline> SNAP receptor activity ; GO:0005484 | non-traceable author statement <newline> SNARE binding ; GO:0000149 | inferred from physical interaction with nSyb, Syx1A <newline> SNAP receptor activity ; GO:0005484 | inferred from direct assay <newline> protein binding ; GO:0005515 | inferred from physical inte…	Hsap\SNAP23 <newline> Hsap\SNAP25
Bica_I	3L_24143356_SNP	N	5.09e-07	0.049	XLOC_015533			0	EXON	+
Bica_I	3L_24205968_SNP	N	1.43e-06	0.049	FBgn0011288	Snap25	Synaptosomal-associated protein 25kDa	0	INTRON	+	neurotransmitter secretion ; GO:0007269 | non-traceable author statement <newline> vesicle-mediated transport ; GO:0016192 | non-traceable author statement <newline> Golgi to plasma membrane transport ; GO:0006893 | inferred from sequence or structural similarity <newline> synaptic vesicle docking involved in exocytosis ; GO:0016081 | non-traceable author statement <newline> synaptic transmission…	plasma membrane ; GO:0005886 | non-traceable author statement <newline> synapse ; GO:0045202 | non-traceable author statement <newline> plasma membrane ; GO:0005886 | inferred from direct assay <newline> SNARE complex ; GO:0031201 | inferred from direct assay <newline> terminal bouton ; GO:0043195 | inferred from direct assay	SNAP receptor activity ; GO:0005484 | inferred from sequence or structural similarity <newline> SNAP receptor activity ; GO:0005484 | non-traceable author statement <newline> SNARE binding ; GO:0000149 | inferred from physical interaction with nSyb, Syx1A <newline> SNAP receptor activity ; GO:0005484 | inferred from direct assay <newline> protein binding ; GO:0005515 | inferred from physical inte…	Hsap\SNAP23 <newline> Hsap\SNAP25
Bica_I	3L_24205968_SNP	N	1.43e-06	0.049	XLOC_015535			0	EXON	+
Bica_I	3L_24205971_SNP	N	6.8e-07	0.049	FBgn0011288	Snap25	Synaptosomal-associated protein 25kDa	0	INTRON	+	neurotransmitter secretion ; GO:0007269 | non-traceable author statement <newline> vesicle-mediated transport ; GO:0016192 | non-traceable author statement <newline> Golgi to plasma membrane transport ; GO:0006893 | inferred from sequence or structural similarity <newline> synaptic vesicle docking involved in exocytosis ; GO:0016081 | non-traceable author statement <newline> synaptic transmission…	plasma membrane ; GO:0005886 | non-traceable author statement <newline> synapse ; GO:0045202 | non-traceable author statement <newline> plasma membrane ; GO:0005886 | inferred from direct assay <newline> SNARE complex ; GO:0031201 | inferred from direct assay <newline> terminal bouton ; GO:0043195 | inferred from direct assay	SNAP receptor activity ; GO:0005484 | inferred from sequence or structural similarity <newline> SNAP receptor activity ; GO:0005484 | non-traceable author statement <newline> SNARE binding ; GO:0000149 | inferred from physical interaction with nSyb, Syx1A <newline> SNAP receptor activity ; GO:0005484 | inferred from direct assay <newline> protein binding ; GO:0005515 | inferred from physical inte…	Hsap\SNAP23 <newline> Hsap\SNAP25
Bica_I	3L_24205971_SNP	N	6.8e-07	0.049	XLOC_015535			0	EXON	+
Bica_I	3L_24206193_SNP	N	3.93e-07	0.049	FBgn0011288	Snap25	Synaptosomal-associated protein 25kDa	0	INTRON	+	neurotransmitter secretion ; GO:0007269 | non-traceable author statement <newline> vesicle-mediated transport ; GO:0016192 | non-traceable author statement <newline> Golgi to plasma membrane transport ; GO:0006893 | inferred from sequence or structural similarity <newline> synaptic vesicle docking involved in exocytosis ; GO:0016081 | non-traceable author statement <newline> synaptic transmission…	plasma membrane ; GO:0005886 | non-traceable author statement <newline> synapse ; GO:0045202 | non-traceable author statement <newline> plasma membrane ; GO:0005886 | inferred from direct assay <newline> SNARE complex ; GO:0031201 | inferred from direct assay <newline> terminal bouton ; GO:0043195 | inferred from direct assay	SNAP receptor activity ; GO:0005484 | inferred from sequence or structural similarity <newline> SNAP receptor activity ; GO:0005484 | non-traceable author statement <newline> SNARE binding ; GO:0000149 | inferred from physical interaction with nSyb, Syx1A <newline> SNAP receptor activity ; GO:0005484 | inferred from direct assay <newline> protein binding ; GO:0005515 | inferred from physical inte…	Hsap\SNAP23 <newline> Hsap\SNAP25
Bica_I	3L_24206193_SNP	N	3.93e-07	0.049	XLOC_015535			0	EXON	+
Bica_I	3L_24303212_SNP	N	1.73e-06	0.049	Intergenic
Bica_I	3L_24303212_SNP	N	1.73e-06	0.049	Intergenic
BS	X_21180779_SNP	N	2.98e-07	0.048	FBgn0031171	CG1801	CG1801	0	INTRON	-	transport ; GO:0006810 | inferred from sequence or structural similarity with UniProtKB:Q99758	ATP-binding cassette (ABC) transporter complex ; GO:0043190 | inferred from sequence or structural similarity with UniProtKB:Q99758	ATPase activity, coupled to transmembrane movement of substances ; GO:0042626 | inferred from sequence or structural similarity with UniProtKB:Q99758 <newline> transporter activity ; GO:0005215 | inferred from sequence or structural similarity with UniProtKB:Q99758 <newline> ATP binding ; GO:0005524 | inferred from electronic annotation with InterPro:IPR003439	-
BS	X_21180779_SNP	N	2.98e-07	0.048	Intergenic
BS	X_21181110_SNP	N	1.82e-08	0.048	FBgn0031171	CG1801	CG1801	0	INTRON	-	transport ; GO:0006810 | inferred from sequence or structural similarity with UniProtKB:Q99758	ATP-binding cassette (ABC) transporter complex ; GO:0043190 | inferred from sequence or structural similarity with UniProtKB:Q99758	ATPase activity, coupled to transmembrane movement of substances ; GO:0042626 | inferred from sequence or structural similarity with UniProtKB:Q99758 <newline> transporter activity ; GO:0005215 | inferred from sequence or structural similarity with UniProtKB:Q99758 <newline> ATP binding ; GO:0005524 | inferred from electronic annotation with InterPro:IPR003439	-
BS	X_21181110_SNP	N	1.82e-08	0.048	Intergenic
BS	2L_1986553_SNP	N	5.84e-08	0.048	FBgn0001125	Got2	Glutamate oxaloacetate transaminase 2	0	INTRON	-	glutamate biosynthetic process ; GO:0006537 | inferred from mutant phenotype <newline> neurotransmitter receptor metabolic process ; GO:0045213 | inferred from mutant phenotype <newline> synapse assembly ; GO:0007416 | inferred from mutant phenotype <newline> aspartate metabolic process ; GO:0006531 | inferred from sequence or structural similarity with UniProtKB:P00505 <newline> glutamate biosyn…	mitochondrion ; GO:0005739 | inferred from sequence or structural similarity with UniProtKB:P00507 <newline> mitochondrial matrix ; GO:0005759 | inferred from sequence or structural similarity with UniProtKB:P00505 <newline> lipid particle ; GO:0005811 | inferred from direct assay <newline> mitochondrion ; GO:0005739 | inferred from direct assay	L-aspartate:2-oxoglutarate aminotransferase activity ; GO:0004069 | inferred from direct assay <newline> L-aspartate:2-oxoglutarate aminotransferase activity ; GO:0004069 | inferred from sequence or structural similarity with UniProtKB:P00507 <newline> L-aspartate:2-oxoglutarate aminotransferase activity ; GO:0004069 | inferred from sequence or structural similarity with UniProtKB:P00505 <newline…	Hsap\GOT1 <newline> Hsap\GOT2
BS	2L_1986553_SNP	N	5.84e-08	0.048	XLOC_003319			188	5PRIME	-
BS	2L_1986553_SNP	N	5.84e-08	0.048	XLOC_003320			20	3PRIME	-
BS	2L_1986553_SNP	N	5.84e-08	0.048	XLOC_003321			674	3PRIME	-
BS	3R_5759037_SNP	N	2.27e-07	0.048	FBgn0267336	Glut4EF	Glut4EF	0	INTRON	+	imaginal disc-derived wing morphogenesis ; GO:0007476 | inferred from mutant phenotype	-	metal ion binding ; GO:0046872 | inferred from electronic annotation with InterPro:IPR007087	-
BS	3R_5761007_SNP	N	4.74e-08	0.048	FBgn0267336	Glut4EF	Glut4EF	0	INTRON	+	imaginal disc-derived wing morphogenesis ; GO:0007476 | inferred from mutant phenotype	-	metal ion binding ; GO:0046872 | inferred from electronic annotation with InterPro:IPR007087	-
BS	3R_5769824_SNP	N	2.92e-07	0.048	FBgn0267336	Glut4EF	Glut4EF	0	EXON	+	imaginal disc-derived wing morphogenesis ; GO:0007476 | inferred from mutant phenotype	-	metal ion binding ; GO:0046872 | inferred from electronic annotation with InterPro:IPR007087	-
BS	3R_5773475_SNP	N	4.32e-08	0.048	FBgn0267336	Glut4EF	Glut4EF	0	INTRON	+	imaginal disc-derived wing morphogenesis ; GO:0007476 | inferred from mutant phenotype	-	metal ion binding ; GO:0046872 | inferred from electronic annotation with InterPro:IPR007087	-
BS	3R_5773475_SNP	N	4.32e-08	0.048	XLOC_020232			0	EXON	+
BS	3R_5773679_SNP	N	1.26e-07	0.048	FBgn0267336	Glut4EF	Glut4EF	0	INTRON	+	imaginal disc-derived wing morphogenesis ; GO:0007476 | inferred from mutant phenotype	-	metal ion binding ; GO:0046872 | inferred from electronic annotation with InterPro:IPR007087	-
BS	3R_5773679_SNP	N	1.26e-07	0.048	XLOC_020232			0	EXON	+
BS	3R_5778207_SNP	N	1.54e-07	0.048	FBgn0267336	Glut4EF	Glut4EF	0	INTRON	+	imaginal disc-derived wing morphogenesis ; GO:0007476 | inferred from mutant phenotype	-	metal ion binding ; GO:0046872 | inferred from electronic annotation with InterPro:IPR007087	-
BS	3R_5778207_SNP	N	1.54e-07	0.048	XLOC_020232			0	EXON	+
BS	3R_5783591_SNP	N	2.22e-07	0.048	FBgn0267336	Glut4EF	Glut4EF	0	INTRON	+	imaginal disc-derived wing morphogenesis ; GO:0007476 | inferred from mutant phenotype	-	metal ion binding ; GO:0046872 | inferred from electronic annotation with InterPro:IPR007087	-
BS	3R_5783879_SNP	N	8.79e-08	0.048	FBgn0267336	Glut4EF	Glut4EF	0	INTRON	+	imaginal disc-derived wing morphogenesis ; GO:0007476 | inferred from mutant phenotype	-	metal ion binding ; GO:0046872 | inferred from electronic annotation with InterPro:IPR007087	-
BS	3R_5789331_SNP	N	5.58e-08	0.048	FBgn0267336	Glut4EF	Glut4EF	0	INTRON	+	imaginal disc-derived wing morphogenesis ; GO:0007476 | inferred from mutant phenotype	-	metal ion binding ; GO:0046872 | inferred from electronic annotation with InterPro:IPR007087	-
BS	3R_5789331_SNP	N	5.58e-08	0.048	XLOC_020233			0	EXON	+
BS	3R_5790626_SNP	N	2.9e-07	0.048	FBgn0267336	Glut4EF	Glut4EF	0	INTRON	+	imaginal disc-derived wing morphogenesis ; GO:0007476 | inferred from mutant phenotype	-	metal ion binding ; GO:0046872 | inferred from electronic annotation with InterPro:IPR007087	-
BS	3R_5790626_SNP	N	2.9e-07	0.048	XLOC_020233			0	EXON	+
BS	3R_5791300_SNP	N	1.33e-07	0.048	FBgn0267336	Glut4EF	Glut4EF	0	INTRON	+	imaginal disc-derived wing morphogenesis ; GO:0007476 | inferred from mutant phenotype	-	metal ion binding ; GO:0046872 | inferred from electronic annotation with InterPro:IPR007087	-
BS	3R_5791300_SNP	N	1.33e-07	0.048	XLOC_020233			0	EXON	+
BS	3R_5804593_SNP	N	3.59e-08	0.048	FBgn0267336	Glut4EF	Glut4EF	0	INTRON	+	imaginal disc-derived wing morphogenesis ; GO:0007476 | inferred from mutant phenotype	-	metal ion binding ; GO:0046872 | inferred from electronic annotation with InterPro:IPR007087	-
BS	3R_5804593_SNP	N	3.59e-08	0.048	XLOC_020233			0	EXON	+
BS	3R_5813779_SNP	N	1.45e-07	0.048	FBgn0267336	Glut4EF	Glut4EF	0	EXON	+	imaginal disc-derived wing morphogenesis ; GO:0007476 | inferred from mutant phenotype	-	metal ion binding ; GO:0046872 | inferred from electronic annotation with InterPro:IPR007087	-
BS	3R_5815474_SNP	N	5.3e-08	0.048	FBgn0267336	Glut4EF	Glut4EF	0	EXON	+	imaginal disc-derived wing morphogenesis ; GO:0007476 | inferred from mutant phenotype	-	metal ion binding ; GO:0046872 | inferred from electronic annotation with InterPro:IPR007087	-
BS	3R_5816807_SNP	N	1.28e-08	0.048	FBgn0267336	Glut4EF	Glut4EF	0	EXON	+	imaginal disc-derived wing morphogenesis ; GO:0007476 | inferred from mutant phenotype	-	metal ion binding ; GO:0046872 | inferred from electronic annotation with InterPro:IPR007087	-
BS	3R_5858785_SNP	N	1.97e-08	0.048	FBgn0053208	Mical	Molecule interacting with CasL	0	INTRON	-	axon guidance ; GO:0007411 | inferred from mutant phenotype <newline> axon guidance ; GO:0007411 | traceable author statement <newline> actin filament depolymerization ; GO:0030042 | inferred from direct assay <newline> sarcomere organization ; GO:0045214 | inferred from mutant phenotype <newline> dendrite morphogenesis ; GO:0048813 | inferred from genetic interaction with Sox14 inferred from mut…	cytosol ; GO:0005829 | non-traceable author statement <newline> plasma membrane ; GO:0005886 | inferred from direct assay <newline> terminal bouton ; GO:0043195 | inferred from direct assay	actin binding ; GO:0003779 | inferred from sequence or structural similarity with UniProtKB:Q07931 <newline> actin binding ; GO:0003779 | inferred from direct assay <newline> zinc ion binding ; GO:0008270 | inferred from electronic annotation with InterPro:IPR001781 <newline> NADPH:sulfur oxidoreductase activity ; GO:0043914 | inferred from direct assay	-
BS	3R_5858785_SNP	N	1.97e-08	0.048	XLOC_023644			981	5PRIME	-
BS	3R_5858785_SNP	N	1.97e-08	0.048	XLOC_023645			0	EXON	-
BS	3R_5858785_SNP	N	1.97e-08	0.048	XLOC_023646			504	3PRIME	-
BS	3R_5862068_SNP	N	2.06e-07	0.048	FBgn0053208	Mical	Molecule interacting with CasL	0	INTRON	-	axon guidance ; GO:0007411 | inferred from mutant phenotype <newline> axon guidance ; GO:0007411 | traceable author statement <newline> actin filament depolymerization ; GO:0030042 | inferred from direct assay <newline> sarcomere organization ; GO:0045214 | inferred from mutant phenotype <newline> dendrite morphogenesis ; GO:0048813 | inferred from genetic interaction with Sox14 inferred from mut…	cytosol ; GO:0005829 | non-traceable author statement <newline> plasma membrane ; GO:0005886 | inferred from direct assay <newline> terminal bouton ; GO:0043195 | inferred from direct assay	actin binding ; GO:0003779 | inferred from sequence or structural similarity with UniProtKB:Q07931 <newline> actin binding ; GO:0003779 | inferred from direct assay <newline> zinc ion binding ; GO:0008270 | inferred from electronic annotation with InterPro:IPR001781 <newline> NADPH:sulfur oxidoreductase activity ; GO:0043914 | inferred from direct assay	-
BS	3R_5862068_SNP	N	2.06e-07	0.048	Intergenic
BS	3R_5862068_SNP	N	2.06e-07	0.048	XLOC_023647			476	5PRIME	-
BS	3R_5862068_SNP	N	2.06e-07	0.048	XLOC_023648			0	EXON	-
BS	3R_5862068_SNP	N	2.06e-07	0.048	XLOC_023649			449	3PRIME	-
BS	3R_5862855_SNP	N	1.19e-07	0.048	FBgn0053208	Mical	Molecule interacting with CasL	0	INTRON	-	axon guidance ; GO:0007411 | inferred from mutant phenotype <newline> axon guidance ; GO:0007411 | traceable author statement <newline> actin filament depolymerization ; GO:0030042 | inferred from direct assay <newline> sarcomere organization ; GO:0045214 | inferred from mutant phenotype <newline> dendrite morphogenesis ; GO:0048813 | inferred from genetic interaction with Sox14 inferred from mut…	cytosol ; GO:0005829 | non-traceable author statement <newline> plasma membrane ; GO:0005886 | inferred from direct assay <newline> terminal bouton ; GO:0043195 | inferred from direct assay	actin binding ; GO:0003779 | inferred from sequence or structural similarity with UniProtKB:Q07931 <newline> actin binding ; GO:0003779 | inferred from direct assay <newline> zinc ion binding ; GO:0008270 | inferred from electronic annotation with InterPro:IPR001781 <newline> NADPH:sulfur oxidoreductase activity ; GO:0043914 | inferred from direct assay	-
BS	3R_5862855_SNP	N	1.19e-07	0.048	Intergenic
BS	3R_5862855_SNP	N	1.19e-07	0.048	Intergenic
BS	3R_5862855_SNP	N	1.19e-07	0.048	XLOC_023648			654	5PRIME	-
BS	3R_5862855_SNP	N	1.19e-07	0.048	XLOC_023649			0	EXON	-
BS	3R_5864048_SNP	N	1.32e-08	0.048	FBgn0053208	Mical	Molecule interacting with CasL	0	INTRON	-	axon guidance ; GO:0007411 | inferred from mutant phenotype <newline> axon guidance ; GO:0007411 | traceable author statement <newline> actin filament depolymerization ; GO:0030042 | inferred from direct assay <newline> sarcomere organization ; GO:0045214 | inferred from mutant phenotype <newline> dendrite morphogenesis ; GO:0048813 | inferred from genetic interaction with Sox14 inferred from mut…	cytosol ; GO:0005829 | non-traceable author statement <newline> plasma membrane ; GO:0005886 | inferred from direct assay <newline> terminal bouton ; GO:0043195 | inferred from direct assay	actin binding ; GO:0003779 | inferred from sequence or structural similarity with UniProtKB:Q07931 <newline> actin binding ; GO:0003779 | inferred from direct assay <newline> zinc ion binding ; GO:0008270 | inferred from electronic annotation with InterPro:IPR001781 <newline> NADPH:sulfur oxidoreductase activity ; GO:0043914 | inferred from direct assay	-
BS	3R_5864048_SNP	N	1.32e-08	0.048	Intergenic
BS	3R_5864048_SNP	N	1.32e-08	0.048	XLOC_023649			685	5PRIME	-
BS	3R_5877506_SNP	N	6.96e-09	0.048	FBgn0037780	CG3925	CG3925	257	3PRIME	+	-	-	-	Hsap\ENSG00000113851
BS	3R_5877506_SNP	N	6.96e-09	0.048	FBgn0037781	Fancl	Fancl	0	EXON	-	protein monoubiquitination ; GO:0006513 | inferred from mutant phenotype <newline> DNA repair ; GO:0006281 | inferred from mutant phenotype	cellular_component ; GO:0005575 | no biological data available <newline> Fanconi anaemia nuclear complex ; GO:0043240 | inferred from electronic annotation with InterPro:IPR026848	ubiquitin-protein ligase activity ; GO:0004842 | inferred from sequence or structural similarity with HGNC_gene:FANCL; HGNC:20748	Hsap\FANCL
BS	3R_5878880_SNP	N	6.3e-09	0.048	FBgn0037781	Fancl	Fancl	289	5PRIME	-	protein monoubiquitination ; GO:0006513 | inferred from mutant phenotype <newline> DNA repair ; GO:0006281 | inferred from mutant phenotype	cellular_component ; GO:0005575 | no biological data available <newline> Fanconi anaemia nuclear complex ; GO:0043240 | inferred from electronic annotation with InterPro:IPR026848	ubiquitin-protein ligase activity ; GO:0004842 | inferred from sequence or structural similarity with HGNC_gene:FANCL; HGNC:20748	Hsap\FANCL
BS	3R_5878880_SNP	N	6.3e-09	0.048	FBgn0051410	Npc2e	Niemann-Pick type C-2e	174	5PRIME	+	sterol transport ; GO:0015918 | inferred from sequence or structural similarity with Npc2a <newline> peptidoglycan recognition protein signaling pathway ; GO:0061057 | inferred from mutant phenotype	extracellular space ; GO:0005615 | inferred from direct assay	sterol binding ; GO:0032934 | inferred from sequence or structural similarity with HGNC_gene:NPC2; HGNC:14537 <newline> peptidoglycan binding ; GO:0042834 | inferred from direct assay <newline> lipid antigen binding ; GO:0030882 | inferred from direct assay <newline> lipopolysaccharide binding ; GO:0001530 | inferred from direct assay <newline> lipoteichoic acid binding ; GO:0070891 | inferred fr…	Hsap\NPC2
BS	3R_5878880_SNP	N	6.3e-09	0.048	FBgn0265081	CR44192	CR44192	0	EXON	-	-	-	-	-
BS	3R_5886228_SNP	N	1.88e-08	0.048	FBgn0037783	Npc2c	Niemann-Pick type C-2c	0	EXON	+	neurogenesis ; GO:0022008 | inferred from mutant phenotype <newline> sterol transport ; GO:0015918 | inferred from sequence or structural similarity with Npc2a	-	sterol binding ; GO:0032934 | inferred from sequence or structural similarity with HGNC_gene:NPC2; HGNC:14537	Hsap\NPC2
BS	3R_5886228_SNP	N	1.88e-08	0.048	FBgn0266732	CR45205	CR45205	160	3PRIME	-	-	-	-	-
BS	3R_5893276_SNP	N	1.27e-07	0.048	FBgn0053783	CG33783	CG33783	0	EXON	+	biological_process ; GO:0008150 | no biological data available	cellular_component ; GO:0005575 | no biological data available	molecular_function ; GO:0003674 | no biological data available	-
BS	3R_5893276_SNP	N	1.27e-07	0.048	FBgn0053784	CG33784	CG33784	351	5PRIME	+	biological_process ; GO:0008150 | no biological data available	cellular_component ; GO:0005575 | no biological data available	molecular_function ; GO:0003674 | no biological data available	-
BS	3R_5902101_SNP	N	8.19e-08	0.048	Intergenic
BS	3R_5907484_SNP	N	1.4e-10	0.048	Intergenic
BS	3R_5912744_SNP	N	2.73e-07	0.048	FBgn0266414	CR45054	CR45054	0	INTRON	+	-	-	-	-
BS	3R_5913405_SNP	N	4.54e-08	0.048	FBgn0266414	CR45054	CR45054	0	INTRON	+	-	-	-	-
BS	3R_5917623_SNP	N	1.6e-09	0.048	Intergenic
BS	3R_5922351_SNP	N	2.1e-10	0.048	FBgn0263413	CR43459	CR43459	0	EXON	+	-	-	-	-
BS	3R_5923029_DEL	N	1.35e-07	0.048	FBgn0263413	CR43459	CR43459	0	EXON	+	-	-	-	-
BS	3R_5923093_SNP	N	1.37e-10	0.048	FBgn0263413	CR43459	CR43459	0	EXON	+	-	-	-	-
BS	3R_5936112_SNP	N	1.94e-10	0.048	FBgn0028734	Fmr1	Fmr1	269	5PRIME	-	mushroom body development ; GO:0016319 | inferred from mutant phenotype <newline> oocyte dorsal/ventral axis specification ; GO:0007310 | inferred from genetic interaction with orb <newline> germarium-derived oocyte fate determination ; GO:0007294 | inferred from mutant phenotype <newline> germ cell development ; GO:0007281 | inferred from mutant phenotype <newline> regulation of translation ; GO…	cytoplasm ; GO:0005737 | inferred from direct assay <newline> RISC complex ; GO:0016442 | traceable author statement <newline> micro-ribonucleoprotein complex ; GO:0035068 | traceable author statement <newline> lipid particle ; GO:0005811 | inferred from direct assay <newline> RISC complex ; GO:0016442 | inferred from physical interaction with AGO2	mRNA binding ; GO:0003729 | non-traceable author statement <newline> mRNA binding ; GO:0003729 | inferred from sequence or structural similarity with UniProtKB:P51116 <newline> RNA binding ; GO:0003723 | inferred from direct assay <newline> protein self-association ; GO:0043621 | inferred from direct assay <newline> protein binding ; GO:0005515 | inferred from physical interaction with piwi infer…	Hsap\FMR1 <newline> Hsap\FXR2 <newline> Hsap\FXR1
BS	3R_5936112_SNP	N	1.94e-10	0.048	XLOC_023656			669	5PRIME	-
BS	3R_5936112_SNP	N	1.94e-10	0.048	Intergenic
BS	3R_5936113_SNP	N	1.22e-09	0.048	FBgn0028734	Fmr1	Fmr1	270	5PRIME	-	mushroom body development ; GO:0016319 | inferred from mutant phenotype <newline> oocyte dorsal/ventral axis specification ; GO:0007310 | inferred from genetic interaction with orb <newline> germarium-derived oocyte fate determination ; GO:0007294 | inferred from mutant phenotype <newline> germ cell development ; GO:0007281 | inferred from mutant phenotype <newline> regulation of translation ; GO…	cytoplasm ; GO:0005737 | inferred from direct assay <newline> RISC complex ; GO:0016442 | traceable author statement <newline> micro-ribonucleoprotein complex ; GO:0035068 | traceable author statement <newline> lipid particle ; GO:0005811 | inferred from direct assay <newline> RISC complex ; GO:0016442 | inferred from physical interaction with AGO2	mRNA binding ; GO:0003729 | non-traceable author statement <newline> mRNA binding ; GO:0003729 | inferred from sequence or structural similarity with UniProtKB:P51116 <newline> RNA binding ; GO:0003723 | inferred from direct assay <newline> protein self-association ; GO:0043621 | inferred from direct assay <newline> protein binding ; GO:0005515 | inferred from physical interaction with piwi infer…	Hsap\FMR1 <newline> Hsap\FXR2 <newline> Hsap\FXR1
BS	3R_5936113_SNP	N	1.22e-09	0.048	XLOC_023656			670	5PRIME	-
BS	3R_5936113_SNP	N	1.22e-09	0.048	Intergenic
BS	3R_5946480_SNP	N	1.34e-10	0.048	FBgn0037788	CG3940	CG3940	677	3PRIME	+	one-carbon metabolic process ; GO:0006730 | inferred from electronic annotation with InterPro:IPR018338	-	carbonate dehydratase activity ; GO:0004089 | inferred from sequence or structural similarity with EMBL:AF079835 <newline> zinc ion binding ; GO:0008270 | inferred from electronic annotation with InterPro:IPR018338	-
BS	3R_5946480_SNP	N	1.34e-10	0.048	FBgn0266721	gammaSnap2	gamma Soluble NSF attachment protein 2	0	EXON	-	neurotransmitter secretion ; GO:0007269 | non-traceable author statement <newline> synaptic vesicle priming ; GO:0016082 | non-traceable author statement <newline> vesicle-mediated transport ; GO:0016192 | inferred from sequence or structural similarity with UniProtKB:P81127 <newline> intracellular protein transport ; GO:0006886 | inferred from electronic annotation with InterPro:IPR000744	cytoplasm ; GO:0005737 | non-traceable author statement <newline> SNARE complex ; GO:0031201 | colocalizes_with inferred from direct assay	soluble NSF attachment protein activity ; GO:0005483 | non-traceable author statement <newline> soluble NSF attachment protein activity ; GO:0005483 | inferred from sequence or structural similarity with UniProtKB:P81127	Hsap\NAPG
BS	3R_5950925_SNP	N	8.46e-09	0.048	FBgn0001321	knk	knickkopf	0	EXON	-	regulation of tube size, open tracheal system ; GO:0035151 | inferred from mutant phenotype <newline> open tracheal system development ; GO:0007424 | inferred from mutant phenotype <newline> terminal region determination ; GO:0007362 | inferred from genetic interaction with tor <newline> torso signaling pathway ; GO:0008293 | inferred from genetic interaction with tor <newline> chitin-based embry…	-	-	-
BS	3R_5950925_SNP	N	8.46e-09	0.048	FBgn0004889	tws	twins	926	3PRIME	-	mitotic anaphase ; GO:0000090 | inferred from mutant phenotype <newline> regulation of mitosis ; GO:0007088 | inferred from mutant phenotype <newline> imaginal disc pattern formation ; GO:0007447 | inferred from mutant phenotype <newline> protein dephosphorylation ; GO:0006470 | inferred from sequence or structural similarity <newline> sensory organ development ; GO:0007423 | inferred from mutant…	protein phosphatase type 2A complex ; GO:0000159 | inferred from sequence or structural similarity <newline> cytoplasm ; GO:0005737 | inferred from direct assay <newline> protein phosphatase type 2A complex ; GO:0000159 | non-traceable author statement <newline> nucleus ; GO:0005634 | inferred from direct assay <newline> microtubule associated complex ; GO:0005875 | inferred from direct assay <ne…	protein serine/threonine phosphatase activity ; GO:0004722 | inferred from sequence or structural similarity <newline> protein phosphatase type 2A regulator activity ; GO:0008601 | inferred from mutant phenotype <newline> protein phosphatase type 2A regulator activity ; GO:0008601 | non-traceable author statement	Hsap\PPP2R2B <newline> Hsap\PPP2R2A <newline> Hsap\ENSG00000074211 <newline> Hsap\ENSG00000175470
BS	3R_5954324_SNP	N	1.6e-08	0.048	FBgn0004889	tws	twins	0	INTRON	-	mitotic anaphase ; GO:0000090 | inferred from mutant phenotype <newline> regulation of mitosis ; GO:0007088 | inferred from mutant phenotype <newline> imaginal disc pattern formation ; GO:0007447 | inferred from mutant phenotype <newline> protein dephosphorylation ; GO:0006470 | inferred from sequence or structural similarity <newline> sensory organ development ; GO:0007423 | inferred from mutant…	protein phosphatase type 2A complex ; GO:0000159 | inferred from sequence or structural similarity <newline> cytoplasm ; GO:0005737 | inferred from direct assay <newline> protein phosphatase type 2A complex ; GO:0000159 | non-traceable author statement <newline> nucleus ; GO:0005634 | inferred from direct assay <newline> microtubule associated complex ; GO:0005875 | inferred from direct assay <ne…	protein serine/threonine phosphatase activity ; GO:0004722 | inferred from sequence or structural similarity <newline> protein phosphatase type 2A regulator activity ; GO:0008601 | inferred from mutant phenotype <newline> protein phosphatase type 2A regulator activity ; GO:0008601 | non-traceable author statement	Hsap\PPP2R2B <newline> Hsap\PPP2R2A <newline> Hsap\ENSG00000074211 <newline> Hsap\ENSG00000175470
BS	3R_5963505_SNP	N	1.73e-10	0.048	FBgn0004889	tws	twins	0	INTRON	-	mitotic anaphase ; GO:0000090 | inferred from mutant phenotype <newline> regulation of mitosis ; GO:0007088 | inferred from mutant phenotype <newline> imaginal disc pattern formation ; GO:0007447 | inferred from mutant phenotype <newline> protein dephosphorylation ; GO:0006470 | inferred from sequence or structural similarity <newline> sensory organ development ; GO:0007423 | inferred from mutant…	protein phosphatase type 2A complex ; GO:0000159 | inferred from sequence or structural similarity <newline> cytoplasm ; GO:0005737 | inferred from direct assay <newline> protein phosphatase type 2A complex ; GO:0000159 | non-traceable author statement <newline> nucleus ; GO:0005634 | inferred from direct assay <newline> microtubule associated complex ; GO:0005875 | inferred from direct assay <ne…	protein serine/threonine phosphatase activity ; GO:0004722 | inferred from sequence or structural similarity <newline> protein phosphatase type 2A regulator activity ; GO:0008601 | inferred from mutant phenotype <newline> protein phosphatase type 2A regulator activity ; GO:0008601 | non-traceable author statement	Hsap\PPP2R2B <newline> Hsap\PPP2R2A <newline> Hsap\ENSG00000074211 <newline> Hsap\ENSG00000175470
BS	3R_5963505_SNP	N	1.73e-10	0.048	XLOC_023659			0	EXON	-
BS	3R_5967982_SNP	Y	1.75e-11	0.048	FBgn0037792	TAF1B	TATA box-binding protein-associated factor RNA polymerase I subunit B	0	EXON	-	-	nucleolus ; GO:0005730 | inferred from direct assay	-	-
BS	3R_5967982_SNP	N	1.75e-11	0.048	FBgn0261817	CG42759	CG42759	810	5PRIME	+	-	-	-	-
BS	3R_5968261_SNP	N	6.12e-10	0.048	FBgn0037792	TAF1B	TATA box-binding protein-associated factor RNA polymerase I subunit B	0	EXON	-	-	nucleolus ; GO:0005730 | inferred from direct assay	-	-
BS	3R_5968261_SNP	N	6.12e-10	0.048	FBgn0261817	CG42759	CG42759	531	5PRIME	+	-	-	-	-
BS	3R_5968350_SNP	N	2.44e-07	0.048	FBgn0037792	TAF1B	TATA box-binding protein-associated factor RNA polymerase I subunit B	0	EXON	-	-	nucleolus ; GO:0005730 | inferred from direct assay	-	-
BS	3R_5968350_SNP	N	2.44e-07	0.048	FBgn0261817	CG42759	CG42759	442	5PRIME	+	-	-	-	-
BS	3R_5968471_SNP	N	1.4e-10	0.048	FBgn0037792	TAF1B	TATA box-binding protein-associated factor RNA polymerase I subunit B	0	EXON	-	-	nucleolus ; GO:0005730 | inferred from direct assay	-	-
BS	3R_5968471_SNP	N	1.4e-10	0.048	FBgn0261817	CG42759	CG42759	321	5PRIME	+	-	-	-	-
BS	3R_5968500_SNP	N	1.26e-10	0.048	FBgn0037792	TAF1B	TATA box-binding protein-associated factor RNA polymerase I subunit B	0	EXON	-	-	nucleolus ; GO:0005730 | inferred from direct assay	-	-
BS	3R_5968500_SNP	N	1.26e-10	0.048	FBgn0261817	CG42759	CG42759	292	5PRIME	+	-	-	-	-
BS	3R_5970308_SNP	N	1.7e-10	0.048	FBgn0037792	TAF1B	TATA box-binding protein-associated factor RNA polymerase I subunit B	402	5PRIME	-	-	nucleolus ; GO:0005730 | inferred from direct assay	-	-
BS	3R_5970308_SNP	N	1.7e-10	0.048	FBgn0086359	Invadolysin	Invadolysin	82	5PRIME	+	mitotic chromosome condensation ; GO:0007076 | inferred from mutant phenotype <newline> imaginal disc development ; GO:0007444 | inferred from mutant phenotype <newline> brain development ; GO:0007420 | inferred from mutant phenotype <newline> chromatin remodeling ; GO:0006338 | inferred from mutant phenotype <newline> mitotic spindle organization ; GO:0007052 | inferred from mutant phenotype <ne…	cell leading edge ; GO:0031252 | inferred from sequence or structural similarity with UniProtKB:Q96KR4 <newline> cytoplasm ; GO:0005737 | inferred from direct assay <newline> membrane ; GO:0016020 | inferred from electronic annotation with InterPro:IPR001577	metalloendopeptidase activity ; GO:0004222 | inferred from sequence or structural similarity with EMBL:M94364 <newline> metalloendopeptidase activity ; GO:0004222 | inferred from direct assay <newline> peptidase activity ; GO:0008233 | inferred from direct assay	Hsap\LMLN
BS	3R_5972562_SNP	N	8.71e-10	0.048	FBgn0086359	Invadolysin	Invadolysin	0	INTRON	+	mitotic chromosome condensation ; GO:0007076 | inferred from mutant phenotype <newline> imaginal disc development ; GO:0007444 | inferred from mutant phenotype <newline> brain development ; GO:0007420 | inferred from mutant phenotype <newline> chromatin remodeling ; GO:0006338 | inferred from mutant phenotype <newline> mitotic spindle organization ; GO:0007052 | inferred from mutant phenotype <ne…	cell leading edge ; GO:0031252 | inferred from sequence or structural similarity with UniProtKB:Q96KR4 <newline> cytoplasm ; GO:0005737 | inferred from direct assay <newline> membrane ; GO:0016020 | inferred from electronic annotation with InterPro:IPR001577	metalloendopeptidase activity ; GO:0004222 | inferred from sequence or structural similarity with EMBL:M94364 <newline> metalloendopeptidase activity ; GO:0004222 | inferred from direct assay <newline> peptidase activity ; GO:0008233 | inferred from direct assay	Hsap\LMLN
BS	3R_5973513_DEL	N	2.34e-07	0.048	FBgn0086359	Invadolysin	Invadolysin	0	INTRON	+	mitotic chromosome condensation ; GO:0007076 | inferred from mutant phenotype <newline> imaginal disc development ; GO:0007444 | inferred from mutant phenotype <newline> brain development ; GO:0007420 | inferred from mutant phenotype <newline> chromatin remodeling ; GO:0006338 | inferred from mutant phenotype <newline> mitotic spindle organization ; GO:0007052 | inferred from mutant phenotype <ne…	cell leading edge ; GO:0031252 | inferred from sequence or structural similarity with UniProtKB:Q96KR4 <newline> cytoplasm ; GO:0005737 | inferred from direct assay <newline> membrane ; GO:0016020 | inferred from electronic annotation with InterPro:IPR001577	metalloendopeptidase activity ; GO:0004222 | inferred from sequence or structural similarity with EMBL:M94364 <newline> metalloendopeptidase activity ; GO:0004222 | inferred from direct assay <newline> peptidase activity ; GO:0008233 | inferred from direct assay	Hsap\LMLN
BS	3R_5990320_SNP	N	2.25e-08	0.048	FBgn0040238	Best1	Bestrophin 1	0	EXON	-	chloride transport ; GO:0006821 | inferred from direct assay <newline> cell volume homeostasis ; GO:0006884 | inferred from direct assay	integral component of membrane ; GO:0016021 | inferred from direct assay	chloride channel activity ; GO:0005254 | non-traceable author statement <newline> volume-sensitive chloride channel activity ; GO:0072320 | inferred from direct assay <newline> chloride channel activity ; GO:0005254 | inferred from direct assay	Hsap\BEST4 <newline> Hsap\BEST3 <newline> Hsap\BEST2 <newline> Hsap\BEST1
BS	3R_5990320_SNP	N	2.25e-08	0.048	XLOC_023662			24	5PRIME	-
BS	3R_6004815_SNP	N	1.94e-11	0.048	FBgn0037796	CG12814	CG12814	0	INTRON	-	-	-	-	-
BS	3R_6015293_SNP	N	2.65e-08	0.048	FBgn0037796	CG12814	CG12814	0	EXON	-	-	-	-	-
BS	3R_6015293_SNP	N	2.65e-08	0.048	XLOC_023670			90	5PRIME	-
BS	3R_6031267_SNP	N	1.86e-07	0.048	FBgn0004575	Syn	Synapsin	0	INTRON	+	neurotransmitter secretion ; GO:0007269 | inferred from sequence or structural similarity with UniProtKB:O88935 <newline> synaptic vesicle exocytosis ; GO:0016079 | inferred from sequence or structural similarity <newline> optomotor response ; GO:0071632 | inferred from mutant phenotype <newline> olfactory learning ; GO:0008355 | inferred from mutant phenotype <newline> behavioral response to eth…	terminal bouton ; GO:0043195 | inferred from direct assay <newline> synaptic vesicle ; GO:0008021 | inferred from sequence or structural similarity with UniProtKB:O88935 <newline> synapse ; GO:0045202 | non-traceable author statement	ATP binding ; GO:0005524 | inferred from electronic annotation with InterPro:IPR013815, InterPro:IPR013816, InterPro:IPR013817, InterPro:IPR016185 <newline> catalytic activity ; GO:0003824 | inferred from electronic annotation with InterPro:IPR013815	Hsap\SYN3 <newline> Hsap\SYN1
BS	3R_6031267_SNP	N	1.86e-07	0.048	FBgn0025879	Timp	Tissue inhibitor of metalloproteases	0	INTRON	-	cell adhesion ; GO:0007155 | inferred from mutant phenotype <newline> phototaxis ; GO:0042331 | inferred from mutant phenotype <newline> imaginal disc-derived wing expansion ; GO:0048526 | inferred from mutant phenotype <newline> delamination ; GO:0060232 | inferred from mutant phenotype <newline> wing disc morphogenesis ; GO:0007472 | inferred from mutant phenotype <newline> tracheal pit formati…	extracellular region ; GO:0005576 | inferred from sequence or structural similarity <newline> dendrite ; GO:0030425 | inferred from mutant phenotype	metalloendopeptidase inhibitor activity ; GO:0008191 | non-traceable author statement <newline> metalloendopeptidase inhibitor activity ; GO:0008191 | inferred from direct assay <newline> metalloendopeptidase inhibitor activity ; GO:0008191 | inferred from sequence or structural similarity with HGNC_gene:TIMP1; HGNC:11820	Hsap\TIMP4 <newline> Hsap\TIMP2 <newline> Hsap\TIMP3 <newline> Hsap\TIMP1
BS	3R_6057434_SNP	N	2.17e-08	0.048	FBgn0261928	CG42795	CG42795	0	INTRON	+	regulation of Rab GTPase activity ; GO:0032313 | inferred from sequence or structural similarity with Evi5	-	Rab GTPase activator activity ; GO:0005097 | inferred from sequence or structural similarity with Evi5	Hsap\TBC1D30
BS	3R_6057434_SNP	N	2.17e-08	0.048	XLOC_020251			87	3PRIME	+
BS	3R_6074223_SNP	N	2.46e-07	0.048	FBgn0261928	CG42795	CG42795	0	EXON	+	regulation of Rab GTPase activity ; GO:0032313 | inferred from sequence or structural similarity with Evi5	-	Rab GTPase activator activity ; GO:0005097 | inferred from sequence or structural similarity with Evi5	Hsap\TBC1D30
BS	3R_6109890_SNP	N	1.39e-07	0.048	FBgn0262617	CG43143	CG43143	0	INTRON	+	protein phosphorylation ; GO:0006468 | non-traceable author statement <newline> protein phosphorylation ; GO:0006468 | inferred from electronic annotation with InterPro:IPR000719, InterPro:IPR002290, InterPro:IPR008271	-	protein serine/threonine kinase activity ; GO:0004674 | non-traceable author statement <newline> ATP binding ; GO:0005524 | inferred from electronic annotation with InterPro:IPR000719, InterPro:IPR002290, InterPro:IPR017441 <newline> protein serine/threonine kinase activity ; GO:0004674 | inferred from electronic annotation with InterPro:IPR008271	-
BS	3R_6115107_SNP	N	7.11e-08	0.048	FBgn0262617	CG43143	CG43143	0	INTRON	+	protein phosphorylation ; GO:0006468 | non-traceable author statement <newline> protein phosphorylation ; GO:0006468 | inferred from electronic annotation with InterPro:IPR000719, InterPro:IPR002290, InterPro:IPR008271	-	protein serine/threonine kinase activity ; GO:0004674 | non-traceable author statement <newline> ATP binding ; GO:0005524 | inferred from electronic annotation with InterPro:IPR000719, InterPro:IPR002290, InterPro:IPR017441 <newline> protein serine/threonine kinase activity ; GO:0004674 | inferred from electronic annotation with InterPro:IPR008271	-
BS	3R_6115107_SNP	N	7.11e-08	0.048	XLOC_020254			0	EXON	+
BS	3R_6175171_SNP	N	2.45e-07	0.048	FBgn0015396	jumu	jumeau	733	5PRIME	+	asymmetric protein localization ; GO:0008105 | inferred from mutant phenotype <newline> neuroblast fate determination ; GO:0007400 | inferred from mutant phenotype <newline> imaginal disc-derived wing morphogenesis ; GO:0007476 | inferred from mutant phenotype <newline> chromatin organization ; GO:0006325 | traceable author statement <newline> dorsal closure ; GO:0007391 | traceable author statem…	nucleus ; GO:0005634 | non-traceable author statement <newline> nucleus ; GO:0005634 | inferred from direct assay <newline> nucleolus ; GO:0005730 | inferred from direct assay <newline> polytene chromosome ; GO:0005700 | inferred from direct assay <newline> polytene chromosome chromocenter ; GO:0005701 | inferred from direct assay <newline> chromatin ; GO:0000785 | colocalizes_with inferred from …	chromatin binding ; GO:0003682 | non-traceable author statement <newline> sequence-specific DNA binding transcription factor activity ; GO:0003700 | non-traceable author statement <newline> sequence-specific DNA binding transcription factor activity ; GO:0003700 | inferred from sequence or structural similarity with WB:lin-31; WP:CE12098 <newline> sequence-specific DNA binding transcription facto…	Hsap\FOXN1
BS	3R_6175171_SNP	N	2.45e-07	0.048	FBgn0051406	CG31406	CG31406	0	EXON	+	notum morphogenesis ; GO:0048802 | inferred from mutant phenotype	cellular_component ; GO:0005575 | no biological data available	molecular_function ; GO:0003674 | no biological data available	-
BS	3R_6197855_SNP	N	2.47e-07	0.048	FBgn0020379	Rfx	Rfx	0	INTRON	-	nervous system development ; GO:0007399 | inferred from mutant phenotype <newline> dendrite morphogenesis ; GO:0048813 | traceable author statement <newline> sensory perception of sound ; GO:0007605 | inferred from mutant phenotype <newline> regulation of transcription, DNA-templated ; GO:0006355 | traceable author statement <newline> regulation of transcription, DNA-templated ; GO:0006355 | infe…	nucleus ; GO:0005634 | non-traceable author statement	sequence-specific DNA binding ; GO:0043565 | inferred from direct assay	Hsap\RFX3 <newline> Hsap\RFX2 <newline> Hsap\RFX1
BS	3R_6219553_SNP	N	9.49e-08	0.048	FBgn0259938	cwo	clockwork orange	0	INTRON	+	regulation of circadian rhythm ; GO:0042752 | inferred from mutant phenotype <newline> regulation of transcription, DNA-templated ; GO:0006355 | inferred from sequence or structural similarity with Hey <newline> circadian regulation of gene expression ; GO:0032922 | inferred from mutant phenotype <newline> negative regulation of transcription from RNA polymerase II promoter ; GO:0000122 | inferre…	nucleus ; GO:0005634 | inferred from direct assay <newline> nucleus ; GO:0005634 | non-traceable author statement	sequence-specific DNA binding transcription factor activity ; GO:0003700 | inferred from direct assay <newline> DNA binding ; GO:0003677 | inferred from electronic annotation with InterPro:IPR003650 <newline> protein dimerization activity ; GO:0046983 | inferred from electronic annotation with InterPro:IPR011598	-
BS	3R_6226686_SNP	N	1.44e-07	0.048	FBgn0045443	mthl11	methuselah-like 11	68	5PRIME	+	G-protein coupled receptor signaling pathway ; GO:0007186 | inferred from sequence or structural similarity with mth <newline> determination of adult lifespan ; GO:0008340 | inferred from sequence or structural similarity with mth <newline> response to stress ; GO:0006950 | inferred from sequence or structural similarity with mth	integral component of membrane ; GO:0016021 | non-traceable author statement <newline> integral component of membrane ; GO:0016021 | inferred from sequence or structural similarity with mth	G-protein coupled receptor activity ; GO:0004930 | inferred from sequence or structural similarity with mth	-
BS	3R_6226686_SNP	N	1.44e-07	0.048	FBgn0259938	cwo	clockwork orange	212	3PRIME	+	regulation of circadian rhythm ; GO:0042752 | inferred from mutant phenotype <newline> regulation of transcription, DNA-templated ; GO:0006355 | inferred from sequence or structural similarity with Hey <newline> circadian regulation of gene expression ; GO:0032922 | inferred from mutant phenotype <newline> negative regulation of transcription from RNA polymerase II promoter ; GO:0000122 | inferre…	nucleus ; GO:0005634 | inferred from direct assay <newline> nucleus ; GO:0005634 | non-traceable author statement	sequence-specific DNA binding transcription factor activity ; GO:0003700 | inferred from direct assay <newline> DNA binding ; GO:0003677 | inferred from electronic annotation with InterPro:IPR003650 <newline> protein dimerization activity ; GO:0046983 | inferred from electronic annotation with InterPro:IPR011598	-
BS	3R_6226977_SNP	N	1.39e-07	0.048	FBgn0045443	mthl11	methuselah-like 11	0	EXON	+	G-protein coupled receptor signaling pathway ; GO:0007186 | inferred from sequence or structural similarity with mth <newline> determination of adult lifespan ; GO:0008340 | inferred from sequence or structural similarity with mth <newline> response to stress ; GO:0006950 | inferred from sequence or structural similarity with mth	integral component of membrane ; GO:0016021 | non-traceable author statement <newline> integral component of membrane ; GO:0016021 | inferred from sequence or structural similarity with mth	G-protein coupled receptor activity ; GO:0004930 | inferred from sequence or structural similarity with mth	-
BS	3R_6226977_SNP	N	1.39e-07	0.048	FBgn0259938	cwo	clockwork orange	503	3PRIME	+	regulation of circadian rhythm ; GO:0042752 | inferred from mutant phenotype <newline> regulation of transcription, DNA-templated ; GO:0006355 | inferred from sequence or structural similarity with Hey <newline> circadian regulation of gene expression ; GO:0032922 | inferred from mutant phenotype <newline> negative regulation of transcription from RNA polymerase II promoter ; GO:0000122 | inferre…	nucleus ; GO:0005634 | inferred from direct assay <newline> nucleus ; GO:0005634 | non-traceable author statement	sequence-specific DNA binding transcription factor activity ; GO:0003700 | inferred from direct assay <newline> DNA binding ; GO:0003677 | inferred from electronic annotation with InterPro:IPR003650 <newline> protein dimerization activity ; GO:0046983 | inferred from electronic annotation with InterPro:IPR011598	-
BS	3R_6227022_SNP	N	1.36e-07	0.048	FBgn0045443	mthl11	methuselah-like 11	0	EXON	+	G-protein coupled receptor signaling pathway ; GO:0007186 | inferred from sequence or structural similarity with mth <newline> determination of adult lifespan ; GO:0008340 | inferred from sequence or structural similarity with mth <newline> response to stress ; GO:0006950 | inferred from sequence or structural similarity with mth	integral component of membrane ; GO:0016021 | non-traceable author statement <newline> integral component of membrane ; GO:0016021 | inferred from sequence or structural similarity with mth	G-protein coupled receptor activity ; GO:0004930 | inferred from sequence or structural similarity with mth	-
BS	3R_6227022_SNP	N	1.36e-07	0.048	FBgn0259938	cwo	clockwork orange	548	3PRIME	+	regulation of circadian rhythm ; GO:0042752 | inferred from mutant phenotype <newline> regulation of transcription, DNA-templated ; GO:0006355 | inferred from sequence or structural similarity with Hey <newline> circadian regulation of gene expression ; GO:0032922 | inferred from mutant phenotype <newline> negative regulation of transcription from RNA polymerase II promoter ; GO:0000122 | inferre…	nucleus ; GO:0005634 | inferred from direct assay <newline> nucleus ; GO:0005634 | non-traceable author statement	sequence-specific DNA binding transcription factor activity ; GO:0003700 | inferred from direct assay <newline> DNA binding ; GO:0003677 | inferred from electronic annotation with InterPro:IPR003650 <newline> protein dimerization activity ; GO:0046983 | inferred from electronic annotation with InterPro:IPR011598	-
BS	3R_6234423_SNP	N	1.5e-08	0.048	FBgn0024957	Irp-1B	Iron regulatory protein 1B	0	EXON	-	regulation of translational initiation by iron ; GO:0006447 | non-traceable author statement <newline> metabolic process ; GO:0008152 | inferred from electronic annotation with InterPro:IPR000573, InterPro:IPR001030, InterPro:IPR006249, InterPro:IPR015928, InterPro:IPR015931, InterPro:IPR015932, InterPro:IPR015934, InterPro:IPR015937	-	iron ion binding ; GO:0005506 | non-traceable author statement <newline> aconitate hydratase activity ; GO:0003994 | inferred from sequence or structural similarity with UniProtKB:P28271 <newline> iron ion binding ; GO:0005506 | inferred from sequence or structural similarity with InterPro:IPR006249 <newline> mRNA binding ; GO:0003729 | inferred from sequence or structural similarity with UniProt…	Hsap\ACO1 <newline> Hsap\IREB2
BS	3R_6238460_DEL	N	7.81e-08	0.048	FBgn0024957	Irp-1B	Iron regulatory protein 1B	0	INTRON	-	regulation of translational initiation by iron ; GO:0006447 | non-traceable author statement <newline> metabolic process ; GO:0008152 | inferred from electronic annotation with InterPro:IPR000573, InterPro:IPR001030, InterPro:IPR006249, InterPro:IPR015928, InterPro:IPR015931, InterPro:IPR015932, InterPro:IPR015934, InterPro:IPR015937	-	iron ion binding ; GO:0005506 | non-traceable author statement <newline> aconitate hydratase activity ; GO:0003994 | inferred from sequence or structural similarity with UniProtKB:P28271 <newline> iron ion binding ; GO:0005506 | inferred from sequence or structural similarity with InterPro:IPR006249 <newline> mRNA binding ; GO:0003729 | inferred from sequence or structural similarity with UniProt…	Hsap\ACO1 <newline> Hsap\IREB2
BS	3R_6238460_DEL	N	7.81e-08	0.048	FBgn0037815	Rrp46	Rrp46	563	5PRIME	+	mRNA processing ; GO:0006397 | inferred from sequence or structural similarity with SGD_LOCUS:RRP46; SGD:S0003327 <newline> regulation of gene expression ; GO:0010468 | inferred from mutant phenotype	cytoplasmic exosome (RNase complex) ; GO:0000177 | inferred from sequence or structural similarity with SGD_LOCUS:RRP46; SGD:S0003327 <newline> nuclear exosome (RNase complex) ; GO:0000176 | inferred from sequence or structural similarity with SGD_LOCUS:RRP46; SGD:S0003327 <newline> cytoplasm ; GO:0005737 | inferred from direct assay <newline> nuclear exosome (RNase complex) ; GO:0000176 | inferr…	3'-5'-exoribonuclease activity ; GO:0000175 | inferred from sequence or structural similarity with SGD_LOCUS:RRP46; SGD:S0003327	Hsap\EXOSC5
BS	3R_6239577_SNP	N	1.38e-08	0.048	FBgn0024957	Irp-1B	Iron regulatory protein 1B	986	5PRIME	-	regulation of translational initiation by iron ; GO:0006447 | non-traceable author statement <newline> metabolic process ; GO:0008152 | inferred from electronic annotation with InterPro:IPR000573, InterPro:IPR001030, InterPro:IPR006249, InterPro:IPR015928, InterPro:IPR015931, InterPro:IPR015932, InterPro:IPR015934, InterPro:IPR015937	-	iron ion binding ; GO:0005506 | non-traceable author statement <newline> aconitate hydratase activity ; GO:0003994 | inferred from sequence or structural similarity with UniProtKB:P28271 <newline> iron ion binding ; GO:0005506 | inferred from sequence or structural similarity with InterPro:IPR006249 <newline> mRNA binding ; GO:0003729 | inferred from sequence or structural similarity with UniProt…	Hsap\ACO1 <newline> Hsap\IREB2
BS	3R_6239577_SNP	N	1.38e-08	0.048	FBgn0037815	Rrp46	Rrp46	0	EXON	+	mRNA processing ; GO:0006397 | inferred from sequence or structural similarity with SGD_LOCUS:RRP46; SGD:S0003327 <newline> regulation of gene expression ; GO:0010468 | inferred from mutant phenotype	cytoplasmic exosome (RNase complex) ; GO:0000177 | inferred from sequence or structural similarity with SGD_LOCUS:RRP46; SGD:S0003327 <newline> nuclear exosome (RNase complex) ; GO:0000176 | inferred from sequence or structural similarity with SGD_LOCUS:RRP46; SGD:S0003327 <newline> cytoplasm ; GO:0005737 | inferred from direct assay <newline> nuclear exosome (RNase complex) ; GO:0000176 | inferr…	3'-5'-exoribonuclease activity ; GO:0000175 | inferred from sequence or structural similarity with SGD_LOCUS:RRP46; SGD:S0003327	Hsap\EXOSC5
BS	3R_6239577_SNP	N	1.38e-08	0.048	FBgn0037816	CG6345	CG6345	363	3PRIME	-	regulation of cyclin-dependent protein serine/threonine kinase activity ; GO:0000079 | inferred from sequence or structural similarity with UniProtKB:Q9JLH6 <newline> RNA modification ; GO:0009451 | inferred from electronic annotation with InterPro:IPR013848	-	transferase activity ; GO:0016740 | inferred from electronic annotation with InterPro:IPR005839 <newline> 4 iron, 4 sulfur cluster binding ; GO:0051539 | inferred from electronic annotation with InterPro:IPR005839, InterPro:IPR013848, InterPro:IPR020612	Hsap\ENSG00000101391
BS	3R_6247377_SNP	N	3.59e-08	0.048	Intergenic
BS	3R_6247377_SNP	N	3.59e-08	0.048	Intergenic
BS	3R_6249135_SNP	N	1.25e-08	0.048	Intergenic
BS	3R_6249292_DEL	N	1.3e-07	0.048	Intergenic
BS	3R_6250044_SNP	N	2.37e-07	0.048	Intergenic
BS	3R_6250778_SNP	N	1.1e-09	0.048	Intergenic
BS	3R_6250778_SNP	N	1.1e-09	0.048	Intergenic
BS	3R_6255180_SNP	N	1.32e-08	0.048	Intergenic
BS	3R_6257887_SNP	N	3.26e-09	0.048	Intergenic
BS	3R_6259407_SNP	N	2.81e-08	0.048	Intergenic
BS	3R_6260109_SNP	N	2.67e-08	0.048	FBgn0037817	Cyp12e1	Cyp12e1	402	5PRIME	+	oxidation-reduction process ; GO:0055114 | inferred from electronic annotation with InterPro:IPR001128, InterPro:IPR002401, InterPro:IPR017972	mitochondrion ; GO:0005739 | inferred from sequence or structural similarity <newline> mitochondrion ; GO:0005739 | non-traceable author statement	electron carrier activity ; GO:0009055 | non-traceable author statement <newline> electron carrier activity ; GO:0009055 | inferred from sequence or structural similarity <newline> oxidoreductase activity, acting on paired donors, with incorporation or reduction of molecular oxygen ; GO:0016705 | inferred from electronic annotation with InterPro:IPR001128, InterPro:IPR002401, InterPro:IPR017972 <…	-
BS	3R_6273083_SNP	N	1.2e-08	0.048	Intergenic
BS	3R_6274056_DEL	N	4.68e-10	0.048	Intergenic
BS	3R_6275587_SNP	N	3.36e-09	0.048	Intergenic
BS	3R_6275801_SNP	N	2.69e-08	0.048	Intergenic
BS	3R_6279124_SNP	N	1.6e-08	0.048	Intergenic
BS	3R_6279688_SNP	N	2.13e-09	0.048	Intergenic
BS	3R_6281953_SNP	N	1.59e-08	0.048	Intergenic
BS	3R_6284891_SNP	N	1.34e-07	0.048	Intergenic
BS	3R_6285713_SNP	N	2.35e-08	0.048	Intergenic
BS	3R_6286116_SNP	N	1.94e-08	0.048	FBgn0266244	CR44939	CR44939	634	5PRIME	+	-	-	-	-
BS	3R_6286982_SNP	N	8.87e-08	0.048	FBgn0266244	CR44939	CR44939	0	EXON	+	-	-	-	-
BS	3R_6292772_SNP	N	2.66e-09	0.048	Intergenic
BS	3R_6293634_SNP	N	3.13e-10	0.048	Intergenic
BS	3R_6295434_SNP	N	1.55e-07	0.048	Intergenic
BS	3R_6295434_SNP	N	1.55e-07	0.048	Intergenic
BS	3R_6295434_SNP	N	1.55e-07	0.048	Intergenic
BS	3R_6301688_SNP	N	7.83e-10	0.048	Intergenic
BS	3R_6301935_SNP	N	1.62e-08	0.048	Intergenic
BS	3R_6303457_SNP	N	6.45e-08	0.048	Intergenic
BS	3R_6308458_SNP	N	1.85e-08	0.048	Intergenic
BS	3R_6318538_SNP	N	7.9e-09	0.048	Intergenic
BS	3R_6318549_SNP	N	1.76e-07	0.048	Intergenic
BS	3R_6351392_SNP	N	2.74e-09	0.048	FBgn0001235	hth	homothorax	0	INTRON	-	peripheral nervous system development ; GO:0007422 | traceable author statement <newline> regulation of transcription from RNA polymerase II promoter ; GO:0006357 | inferred from sequence or structural similarity with MGD:Meis1; MGI:MGI:104717 <newline> brain development ; GO:0007420 | inferred from mutant phenotype <newline> proximal/distal pattern formation ; GO:0009954 | traceable author state…	nucleus ; GO:0005634 | inferred from sequence or structural similarity with MGD:Meis1; MGI:MGI:104717 <newline> nucleus ; GO:0005634 | inferred from direct assay <newline> transcription factor complex ; GO:0005667 | inferred from physical interaction with abd-A inferred from physical interaction with exd <newline> cytoplasm ; GO:0005737 | inferred from direct assay	sequence-specific DNA binding transcription factor activity ; GO:0003700 | inferred from sequence or structural similarity with MGD:Meis1; MGI:MGI:104717 <newline> sequence-specific DNA binding transcription factor activity ; GO:0003700 | traceable author statement <newline> RNA polymerase II distal enhancer sequence-specific DNA binding transcription factor activity ; GO:0003705 | inferred from …	Hsap\MEIS2 <newline> Hsap\MEIS1 <newline> Hsap\ENSG00000105419
BS	3R_6504004_SNP	N	2.42e-09	0.048	FBgn0037819	CG14688	CG14688	0	INTRON	-	fatty acid alpha-oxidation ; GO:0001561 | inferred from sequence or structural similarity with HGNC_gene:PHYH; HGNC:8940	peroxisome ; GO:0005777 | inferred from sequence or structural similarity with HGNC_gene:PHYH; HGNC:8940	phytanoyl-CoA dioxygenase activity ; GO:0048244 | inferred from sequence or structural similarity with HGNC_gene:PHYH; HGNC:8940	Hsap\PHYHD1
BS	3R_6531789_SNP	N	2.42e-09	0.048	FBgn0037824	CG14684	CG14684	907	5PRIME	+	regulation of cell cycle ; GO:0051726 | inferred from direct assay	cellular_component ; GO:0005575 | no biological data available	molecular_function ; GO:0003674 | no biological data available	-
BS	3R_6531789_SNP	N	2.42e-09	0.048	FBgn0051391	CG31391	CG31391	992	5PRIME	-	negative regulation of phosphatase activity ; GO:0010923 | inferred from electronic annotation with InterPro:IPR026142	-	phosphatase binding ; GO:0019902 | inferred from electronic annotation with InterPro:IPR026142	-
BS	3R_6531789_SNP	N	2.42e-09	0.048	FBgn0051467	CG31467	CG31467	0	EXON	-	negative regulation of phosphatase activity ; GO:0010923 | inferred from electronic annotation with InterPro:IPR026142	-	phosphatase binding ; GO:0019902 | inferred from electronic annotation with InterPro:IPR026142	-
BS	3R_6910911_SNP	N	4.97e-08	0.048	FBgn0266245	CR44940	CR44940	0	EXON	-	-	-	-	-
BS	3R_6913210_DEL	N	2.36e-09	0.048	FBgn0263403	CG43449	CG43449	932	5PRIME	+	-	-	-	-
BS	3R_6918240_SNP	N	1.95e-07	0.048	Intergenic
BS	3R_6922115_SNP	N	1.5e-07	0.048	Intergenic
BS	3R_6932735_SNP	N	3.11e-07	0.048	Intergenic
BS	3R_7094022_INS	N	1.24e-07	0.048	Intergenic
BS	3R_7267799_SNP	N	2.51e-07	0.048	FBgn0046225	CG17230	CG17230	0	INTRON	+	-	-	-	-
BS	3R_7267799_SNP	N	2.51e-07	0.048	FBgn0051374	sals	sarcomere length short	0	INTRON	-	positive regulation of actin filament polymerization ; GO:0030838 | inferred from mutant phenotype <newline> regulation of sarcomere organization ; GO:0060297 | inferred from mutant phenotype	-	actin filament binding ; GO:0051015 | inferred from direct assay	-
BS	3L_5498880_SNP	Y	4.52e-08	0.048	FBgn0085371	CG34342	CG34342	0	INTRON	-	biological_process ; GO:0008150 | no biological data available	cellular_component ; GO:0005575 | no biological data available	fatty-acyl-CoA reductase (alcohol-forming) activity ; GO:0080019 | inferred from sequence or structural similarity with HGNC_gene:FAR1; HGNC:26222	-
BS	3L_5498893_SNP	N	1.29e-07	0.048	FBgn0085371	CG34342	CG34342	0	INTRON	-	biological_process ; GO:0008150 | no biological data available	cellular_component ; GO:0005575 | no biological data available	fatty-acyl-CoA reductase (alcohol-forming) activity ; GO:0080019 | inferred from sequence or structural similarity with HGNC_gene:FAR1; HGNC:26222	-
BS	3L_5498896_SNP	N	4.52e-08	0.048	FBgn0085371	CG34342	CG34342	0	INTRON	-	biological_process ; GO:0008150 | no biological data available	cellular_component ; GO:0005575 | no biological data available	fatty-acyl-CoA reductase (alcohol-forming) activity ; GO:0080019 | inferred from sequence or structural similarity with HGNC_gene:FAR1; HGNC:26222	-
BS	3L_11876725_SNP	Y	1.45e-07	0.048	FBgn0036219	CCDC151	Coiled-coil domain containing protein 151	79	3PRIME	+	negative gravitaxis ; GO:0048060 | inferred from mutant phenotype <newline> axonemal dynein complex assembly ; GO:0070286 | inferred from sequence or structural similarity with UniProtKB:F1QFD6 <newline> cilium movement ; GO:0003341 | inferred from sequence or structural similarity with UniProtKB:F1QFD6	ciliary tip ; GO:0097542 | inferred from direct assay <newline> ciliary rootlet ; GO:0035253 | inferred from direct assay <newline> cell body ; GO:0044297 | inferred from direct assay <newline> motile cilium ; GO:0031514 | inferred from direct assay	molecular_function ; GO:0003674 | no biological data available	-
BS	3L_11876725_SNP	N	1.45e-07	0.048	FBgn0266100	CG44837	CG44837	0	INTRON	-	proteolysis ; GO:0006508 | inferred from electronic annotation with InterPro:IPR008257	-	dipeptidase activity ; GO:0016805 | inferred from sequence or structural similarity with UniProtKB:P31430	Hsap\DPEP2 <newline> Hsap\ENSG00000141096 <newline> Hsap\DPEP1
BS	3L_11876725_SNP	N	1.45e-07	0.048	Intergenic
Chimpo_I	3L_16779465_SNP	Y	1.99e-08	0.039	FBgn0025582	Int6	Int6 homologue	0	EXON	-	translational initiation ; GO:0006413 | inferred from sequence or structural similarity with EMBL:AL035216; protein_id:CAA22813 <newline> translational initiation ; GO:0006413 | inferred from sequence or structural similarity <newline> translational initiation ; GO:0006413 | inferred from sequence or structural similarity with HGNC_gene:EIF3E; HGNC:3277 <newline> neuron projection morphogenesis ;…	eukaryotic translation initiation factor 3 complex ; GO:0005852 | inferred from sequence or structural similarity with EMBL:AL035216; protein_id:CAA22813 <newline> eukaryotic translation initiation factor 3 complex ; GO:0005852 | inferred from sequence or structural similarity <newline> cytosol ; GO:0005829 | non-traceable author statement <newline> eukaryotic translation initiation factor 3 comp…	translation initiation factor activity ; GO:0003743 | inferred from sequence or structural similarity with EMBL:AL035216; protein_id:CAA22813 <newline> translation initiation factor activity ; GO:0003743 | inferred from sequence or structural similarity <newline> translation initiation factor activity ; GO:0003743 | non-traceable author statement <newline> translation initiation factor activity ;…	Hsap\ENSG00000104408
Chimpo_I	3L_16781735_SNP	N	4.95e-08	0.039	FBgn0036663	CG9674	CG9674	0	INTRON	-	oxidation-reduction process ; GO:0055114 | inferred from electronic annotation with InterPro:IPR001327, InterPro:IPR002489, InterPro:IPR002932, InterPro:IPR006005, InterPro:IPR006982, InterPro:IPR012220, InterPro:IPR012285, InterPro:IPR023753 <newline> glutamate biosynthetic process ; GO:0006537 | inferred from electronic annotation with InterPro:IPR002932, InterPro:IPR006005, InterPro:IPR012220	-	glutamate synthase (NADPH) activity ; GO:0004355 | inferred from sequence or structural similarity with UniProtKB:Q03460 <newline> iron-sulfur cluster binding ; GO:0051536 | inferred from electronic annotation with InterPro:IPR009051, InterPro:IPR012285 <newline> glutamate synthase (NADH) activity ; GO:0016040 | inferred from electronic annotation with InterPro:IPR012220 <newline> flavin adenine …	-
Chimpo_I	3L_16783620_SNP	N	2.34e-09	0.039	FBgn0036663	CG9674	CG9674	0	EXON	-	oxidation-reduction process ; GO:0055114 | inferred from electronic annotation with InterPro:IPR001327, InterPro:IPR002489, InterPro:IPR002932, InterPro:IPR006005, InterPro:IPR006982, InterPro:IPR012220, InterPro:IPR012285, InterPro:IPR023753 <newline> glutamate biosynthetic process ; GO:0006537 | inferred from electronic annotation with InterPro:IPR002932, InterPro:IPR006005, InterPro:IPR012220	-	glutamate synthase (NADPH) activity ; GO:0004355 | inferred from sequence or structural similarity with UniProtKB:Q03460 <newline> iron-sulfur cluster binding ; GO:0051536 | inferred from electronic annotation with InterPro:IPR009051, InterPro:IPR012285 <newline> glutamate synthase (NADH) activity ; GO:0016040 | inferred from electronic annotation with InterPro:IPR012220 <newline> flavin adenine …	-
Chimpo_I	3L_16783665_SNP	N	2.96e-09	0.039	FBgn0036663	CG9674	CG9674	0	EXON	-	oxidation-reduction process ; GO:0055114 | inferred from electronic annotation with InterPro:IPR001327, InterPro:IPR002489, InterPro:IPR002932, InterPro:IPR006005, InterPro:IPR006982, InterPro:IPR012220, InterPro:IPR012285, InterPro:IPR023753 <newline> glutamate biosynthetic process ; GO:0006537 | inferred from electronic annotation with InterPro:IPR002932, InterPro:IPR006005, InterPro:IPR012220	-	glutamate synthase (NADPH) activity ; GO:0004355 | inferred from sequence or structural similarity with UniProtKB:Q03460 <newline> iron-sulfur cluster binding ; GO:0051536 | inferred from electronic annotation with InterPro:IPR009051, InterPro:IPR012285 <newline> glutamate synthase (NADH) activity ; GO:0016040 | inferred from electronic annotation with InterPro:IPR012220 <newline> flavin adenine …	-
Chimpo_I	3L_16784051_SNP	N	5.52e-10	0.039	FBgn0036663	CG9674	CG9674	0	INTRON	-	oxidation-reduction process ; GO:0055114 | inferred from electronic annotation with InterPro:IPR001327, InterPro:IPR002489, InterPro:IPR002932, InterPro:IPR006005, InterPro:IPR006982, InterPro:IPR012220, InterPro:IPR012285, InterPro:IPR023753 <newline> glutamate biosynthetic process ; GO:0006537 | inferred from electronic annotation with InterPro:IPR002932, InterPro:IPR006005, InterPro:IPR012220	-	glutamate synthase (NADPH) activity ; GO:0004355 | inferred from sequence or structural similarity with UniProtKB:Q03460 <newline> iron-sulfur cluster binding ; GO:0051536 | inferred from electronic annotation with InterPro:IPR009051, InterPro:IPR012285 <newline> glutamate synthase (NADH) activity ; GO:0016040 | inferred from electronic annotation with InterPro:IPR012220 <newline> flavin adenine …	-
Chimpo_I	3L_24097415_SNP	Y	1.16e-11	0.039	FBgn0011288	Snap25	Synaptosomal-associated protein 25kDa	0	INTRON	+	neurotransmitter secretion ; GO:0007269 | non-traceable author statement <newline> vesicle-mediated transport ; GO:0016192 | non-traceable author statement <newline> Golgi to plasma membrane transport ; GO:0006893 | inferred from sequence or structural similarity <newline> synaptic vesicle docking involved in exocytosis ; GO:0016081 | non-traceable author statement <newline> synaptic transmission…	plasma membrane ; GO:0005886 | non-traceable author statement <newline> synapse ; GO:0045202 | non-traceable author statement <newline> plasma membrane ; GO:0005886 | inferred from direct assay <newline> SNARE complex ; GO:0031201 | inferred from direct assay <newline> terminal bouton ; GO:0043195 | inferred from direct assay	SNAP receptor activity ; GO:0005484 | inferred from sequence or structural similarity <newline> SNAP receptor activity ; GO:0005484 | non-traceable author statement <newline> SNARE binding ; GO:0000149 | inferred from physical interaction with nSyb, Syx1A <newline> SNAP receptor activity ; GO:0005484 | inferred from direct assay <newline> protein binding ; GO:0005515 | inferred from physical inte…	Hsap\SNAP23 <newline> Hsap\SNAP25
Chimpo_I	3L_24097444_SNP	N	1.56e-07	0.039	FBgn0011288	Snap25	Synaptosomal-associated protein 25kDa	0	INTRON	+	neurotransmitter secretion ; GO:0007269 | non-traceable author statement <newline> vesicle-mediated transport ; GO:0016192 | non-traceable author statement <newline> Golgi to plasma membrane transport ; GO:0006893 | inferred from sequence or structural similarity <newline> synaptic vesicle docking involved in exocytosis ; GO:0016081 | non-traceable author statement <newline> synaptic transmission…	plasma membrane ; GO:0005886 | non-traceable author statement <newline> synapse ; GO:0045202 | non-traceable author statement <newline> plasma membrane ; GO:0005886 | inferred from direct assay <newline> SNARE complex ; GO:0031201 | inferred from direct assay <newline> terminal bouton ; GO:0043195 | inferred from direct assay	SNAP receptor activity ; GO:0005484 | inferred from sequence or structural similarity <newline> SNAP receptor activity ; GO:0005484 | non-traceable author statement <newline> SNARE binding ; GO:0000149 | inferred from physical interaction with nSyb, Syx1A <newline> SNAP receptor activity ; GO:0005484 | inferred from direct assay <newline> protein binding ; GO:0005515 | inferred from physical inte…	Hsap\SNAP23 <newline> Hsap\SNAP25
Copia1-I_DM	2L_22803513_SNP	N	1.11e-07	0.047	Intergenic
Copia1-I_DM	2L_22803513_SNP	N	1.11e-07	0.047	Intergenic
Copia1-I_DM	3R_489992_SNP	N	1.67e-08	0.047	FBgn0263346	CG43427	CG43427	0	INTRON	+	imaginal disc-derived wing morphogenesis ; GO:0007476 | inferred from mutant phenotype	cellular_component ; GO:0005575 | no biological data available	molecular_function ; GO:0003674 | no biological data available <newline> zinc ion binding ; GO:0008270 | inferred from electronic annotation with InterPro:IPR001781	-
Copia1-I_DM	3R_489992_SNP	N	1.67e-08	0.047	Intergenic
Copia1-I_DM	3R_489992_SNP	N	1.67e-08	0.047	Intergenic
Copia1-I_DM	3R_490343_SNP	N	1.95e-08	0.047	FBgn0263346	CG43427	CG43427	0	INTRON	+	imaginal disc-derived wing morphogenesis ; GO:0007476 | inferred from mutant phenotype	cellular_component ; GO:0005575 | no biological data available	molecular_function ; GO:0003674 | no biological data available <newline> zinc ion binding ; GO:0008270 | inferred from electronic annotation with InterPro:IPR001781	-
Copia1-I_DM	3R_490343_SNP	N	1.95e-08	0.047	Intergenic
Copia1-I_DM	3L_22130350_SNP	N	9.69e-08	0.047	FBgn0037153	olf413	olf413	0	INTRON	+	oxidation-reduction process ; GO:0055114 | inferred from electronic annotation with InterPro:IPR000323, InterPro:IPR000945, InterPro:IPR014783, InterPro:IPR014784	extracellular space ; GO:0005615 | inferred from sequence or structural similarity with to	dopamine beta-monooxygenase activity ; GO:0004500 | inferred from sequence or structural similarity with UniProtKB:P15101 <newline> copper ion binding ; GO:0005507 | inferred from electronic annotation with InterPro:IPR000323	-
Copia1-I_DM	3L_22207174_SNP	N	2.43e-07	0.047	FBgn0037153	olf413	olf413	0	INTRON	+	oxidation-reduction process ; GO:0055114 | inferred from electronic annotation with InterPro:IPR000323, InterPro:IPR000945, InterPro:IPR014783, InterPro:IPR014784	extracellular space ; GO:0005615 | inferred from sequence or structural similarity with to	dopamine beta-monooxygenase activity ; GO:0004500 | inferred from sequence or structural similarity with UniProtKB:P15101 <newline> copper ion binding ; GO:0005507 | inferred from electronic annotation with InterPro:IPR000323	-
Copia1-I_DM	3L_22209672_SNP	N	1.32e-08	0.047	FBgn0037153	olf413	olf413	0	INTRON	+	oxidation-reduction process ; GO:0055114 | inferred from electronic annotation with InterPro:IPR000323, InterPro:IPR000945, InterPro:IPR014783, InterPro:IPR014784	extracellular space ; GO:0005615 | inferred from sequence or structural similarity with to	dopamine beta-monooxygenase activity ; GO:0004500 | inferred from sequence or structural similarity with UniProtKB:P15101 <newline> copper ion binding ; GO:0005507 | inferred from electronic annotation with InterPro:IPR000323	-
Copia1-I_DM	3L_22382101_SNP	N	6.75e-08	0.047	FBgn0004449	Ten-m	Tenascin major	0	INTRON	-	cell adhesion ; GO:0007155 | inferred from mutant phenotype <newline> regulation of cell shape ; GO:0008360 | inferred from mutant phenotype <newline> cell adhesion ; GO:0007155 | inferred from sequence or structural similarity with EMBL:AB025410 <newline> compound eye photoreceptor development ; GO:0042051 | inferred from mutant phenotype <newline> R7 cell development ; GO:0045467 | inferred fro…	proteinaceous extracellular matrix ; GO:0005578 | inferred from sequence or structural similarity <newline> integral component of plasma membrane ; GO:0005887 | inferred from direct assay <newline> proteinaceous extracellular matrix ; GO:0005578 | inferred from sequence or structural similarity with EMBL:AB025410 <newline> neuromuscular junction ; GO:0031594 | inferred from direct assay <newline>…	filamin binding ; GO:0031005 | inferred from direct assay <newline> identical protein binding ; GO:0042802 | inferred from direct assay	-
Copia1-I_DM	3L_22397839_DEL	N	6.39e-10	0.047	FBgn0004449	Ten-m	Tenascin major	0	INTRON	-	cell adhesion ; GO:0007155 | inferred from mutant phenotype <newline> regulation of cell shape ; GO:0008360 | inferred from mutant phenotype <newline> cell adhesion ; GO:0007155 | inferred from sequence or structural similarity with EMBL:AB025410 <newline> compound eye photoreceptor development ; GO:0042051 | inferred from mutant phenotype <newline> R7 cell development ; GO:0045467 | inferred fro…	proteinaceous extracellular matrix ; GO:0005578 | inferred from sequence or structural similarity <newline> integral component of plasma membrane ; GO:0005887 | inferred from direct assay <newline> proteinaceous extracellular matrix ; GO:0005578 | inferred from sequence or structural similarity with EMBL:AB025410 <newline> neuromuscular junction ; GO:0031594 | inferred from direct assay <newline>…	filamin binding ; GO:0031005 | inferred from direct assay <newline> identical protein binding ; GO:0042802 | inferred from direct assay	-
Copia1-I_DM	3L_22578296_SNP	N	1.97e-07	0.047	FBgn0037171	CG14459	CG14459	0	INTRON	-	-	-	-	-
Copia1-I_DM	3L_22635678_SNP	N	1.9e-07	0.047	Intergenic
Copia1-I_DM	3L_22665824_SNP	N	1.85e-07	0.047	FBgn0037174	CG14457	CG14457	0	INTRON	+	-	extracellular space ; GO:0005615 | inferred from sequence or structural similarity with to	-	-
Copia1-I_DM	3L_22710999_SNP	N	5.52e-08	0.047	FBgn0037182	ArfGAP3	ADP-ribosylation factor GTPase activating protein 3	322	5PRIME	-	lateral inhibition ; GO:0046331 | inferred from mutant phenotype <newline> compound eye morphogenesis ; GO:0001745 | inferred from mutant phenotype <newline> regulation of ARF GTPase activity ; GO:0032312 | inferred from electronic annotation with InterPro:IPR001164 <newline> regulation of ARF GTPase activity ; GO:0032312 | inferred from sequence model	cytoplasm ; GO:0005737 | inferred from direct assay <newline> adherens junction ; GO:0005912 | colocalizes_with inferred from direct assay	ARF GTPase activator activity ; GO:0008060 | inferred from sequence or structural similarity with SGD_LOCUS:GLO3; SGD:S0000924 <newline> zinc ion binding ; GO:0008270 | inferred from electronic annotation with InterPro:IPR001164 <newline> ARF GTPase activator activity ; GO:0008060 | inferred from sequence model	Hsap\ARFGAP3 <newline> Hsap\ARFGAP2
Copia1-I_DM	3L_22710999_SNP	N	5.52e-08	0.047	FBgn0052452	CG32452	CG32452	0	EXON	+	biological_process ; GO:0008150 | no biological data available	cellular_component ; GO:0005575 | no biological data available	molecular_function ; GO:0003674 | no biological data available	-
Copia1-I_DM	3L_22710999_SNP	N	5.52e-08	0.047	Intergenic
Copia1-I_DM	3L_22730959_SNP	N	7.15e-08	0.047	FBgn0010830	l(3)04053	lethal (3) 04053	743	3PRIME	-	biological_process ; GO:0008150 | no biological data available	cellular_component ; GO:0005575 | no biological data available	molecular_function ; GO:0003674 | no biological data available	-
Copia1-I_DM	3L_22730959_SNP	N	7.15e-08	0.047	FBgn0037186	CG11241	CG11241	0	INTRON	-	-	-	pyridoxal phosphate binding ; GO:0030170 | inferred from electronic annotation with InterPro:IPR005814, InterPro:IPR015421, InterPro:IPR015422 <newline> alanine-glyoxylate transaminase activity ; GO:0008453 | inferred from sequence or structural similarity with UniProtKB:Q64565	Hsap\AGXT2L1 <newline> Hsap\AGXT2L2 <newline> Hsap\AGXT2
Copia1-I_DM	3L_22730959_SNP	N	7.15e-08	0.047	FBgn0266656	CR45163	CR45163	849	5PRIME	+	-	-	-	-
Copia1-I_DM	3L_22839110_INS	N	2.66e-07	0.047	Intergenic
Copia1-I_DM	3L_22839110_INS	N	2.66e-07	0.047	Intergenic
Copia1-I_DM	3L_22858826_SNP	N	1.25e-08	0.047	FBgn0053170	CG33170	CG33170	0	INTRON	+	-	-	-	-
Copia1-I_DM	3L_22858826_SNP	N	1.25e-08	0.047	Intergenic
Copia1-I_DM	3L_22862618_SNP	N	3.87e-08	0.047	FBgn0010348	Arf79F	ADP ribosylation factor at 79F	0	INTRON	-	protein ADP-ribosylation ; GO:0006471 | inferred from sequence or structural similarity with UniProtKB:P51643 <newline> protein ADP-ribosylation ; GO:0006471 | non-traceable author statement <newline> neurotransmitter secretion ; GO:0007269 | traceable author statement <newline> synaptic vesicle endocytosis ; GO:0048488 | traceable author statement <newline> cell adhesion ; GO:0007155 | inferred …	intracellular membrane-bounded organelle ; GO:0043231 | colocalizes_with inferred from direct assay <newline> Golgi stack ; GO:0005795 | inferred from direct assay	GTP binding ; GO:0005525 | inferred from sequence or structural similarity with MGD:Arf2; MGI:MGI:99595 <newline> GTP binding ; GO:0005525 | non-traceable author statement <newline> GTPase activity ; GO:0003924 | inferred from sequence or structural similarity	Hsap\ARF5 <newline> Hsap\ARF4 <newline> Hsap\ARF1
Copia1-I_DM	3L_22862618_SNP	N	3.87e-08	0.047	FBgn0020518	snoRNA:Me28S-G764	snoRNA:Me28S-G764	27	3PRIME	-	-	nucleolus ; GO:0005730 | inferred from sequence or structural similarity	-	-
Copia1-I_DM	3L_22868949_SNP	N	5.07e-08	0.047	FBgn0044324	Chro	Chromator	0	EXON	-	chromatin organization ; GO:0006325 | non-traceable author statement <newline> mitotic spindle organization ; GO:0007052 | inferred from mutant phenotype <newline> chromosome segregation ; GO:0007059 | inferred from mutant phenotype <newline> mitotic anaphase ; GO:0000090 | inferred from mutant phenotype <newline> metaphase plate congression ; GO:0051310 | inferred from mutant phenotype <newline>…	polytene chromosome interband ; GO:0005705 | non-traceable author statement <newline> polytene chromosome interband ; GO:0005705 | inferred from direct assay <newline> spindle ; GO:0005819 | inferred from direct assay <newline> centrosome ; GO:0005813 | inferred from direct assay <newline> polytene chromosome ; GO:0005700 | inferred from direct assay <newline> nucleus ; GO:0005634 | inferred from…	histone binding ; GO:0042393 | inferred from physical interaction with His1	-
Copia1-I_DM	3L_22887607_SNP	N	1.78e-07	0.047	FBgn0037203	slif	slimfast	686	3PRIME	+	lipid metabolic process ; GO:0006629 | inferred from mutant phenotype <newline> amino acid transport ; GO:0006865 | inferred from direct assay <newline> growth ; GO:0040007 | inferred from mutant phenotype <newline> defense response to Gram-negative bacterium ; GO:0050829 | inferred from mutant phenotype <newline> negative regulation of innate immune response ; GO:0045824 | inferred from mutant p…	membrane ; GO:0016020 | inferred from electronic annotation with InterPro:IPR002293, InterPro:IPR004841	cationic amino acid transmembrane transporter activity ; GO:0015326 | inferred from sequence or structural similarity with EMBL:AB000113; protein_id:BAA20133 <newline> cationic amino acid transmembrane transporter activity ; GO:0015326 | inferred from direct assay	Hsap\SLC7A2 <newline> Hsap\SLC7A4 <newline> Hsap\LRRC7 <newline> Hsap\SLC7A14 <newline> Hsap\ERBB2IP <newline> Hsap\SLC7A1 <newline> Hsap\SLC7A3
Copia1-I_DM	3L_22951560_SNP	N	7.47e-08	0.047	Intergenic
Copia1-I_DM	3L_22956431_SNP	N	7.49e-08	0.047	Intergenic
Copia1-I_DM	3L_22959212_SNP	N	7.9e-08	0.047	Intergenic
Copia1-I_DM	3L_22979016_SNP	N	2.69e-09	0.047	Intergenic
Copia1-I_DM	3L_22979016_SNP	N	2.69e-09	0.047	Intergenic
Copia1-I_DM	3L_22979016_SNP	N	2.69e-09	0.047	Intergenic
Copia1-I_DM	3L_22980610_SNP	N	2.19e-07	0.047	FBgn0052457	CG32457	CG32457	132	5PRIME	+	biological_process ; GO:0008150 | no biological data available	cellular_component ; GO:0005575 | no biological data available	molecular_function ; GO:0003674 | no biological data available	-
Copia1-I_DM	3L_22980610_SNP	N	2.19e-07	0.047	Intergenic
Copia1-I_DM	3L_22980610_SNP	N	2.19e-07	0.047	Intergenic
Copia1-I_DM	3L_22991776_SNP	N	2.77e-07	0.047	FBgn0262509	nrm	neuromusculin	0	EXON	+	cell adhesion ; GO:0007155 | non-traceable author statement <newline> synaptic target recognition ; GO:0008039 | inferred from mutant phenotype	plasma membrane ; GO:0005886 | inferred from direct assay AND inferred from sequence or structural similarity	molecular_function ; GO:0003674 | no biological data available	-
Copia1-I_DM	3L_22991776_SNP	N	2.77e-07	0.047	Intergenic
Copia1-I_DM	3L_23001457_SNP	Y	3.04e-11	0.047	FBgn0262509	nrm	neuromusculin	0	INTRON	+	cell adhesion ; GO:0007155 | non-traceable author statement <newline> synaptic target recognition ; GO:0008039 | inferred from mutant phenotype	plasma membrane ; GO:0005886 | inferred from direct assay AND inferred from sequence or structural similarity	molecular_function ; GO:0003674 | no biological data available	-
Copia1-I_DM	3L_23001457_SNP	N	3.04e-11	0.047	XLOC_015362			0	EXON	+
Copia1-I_DM	3L_23001467_SNP	N	2.11e-09	0.047	FBgn0262509	nrm	neuromusculin	0	INTRON	+	cell adhesion ; GO:0007155 | non-traceable author statement <newline> synaptic target recognition ; GO:0008039 | inferred from mutant phenotype	plasma membrane ; GO:0005886 | inferred from direct assay AND inferred from sequence or structural similarity	molecular_function ; GO:0003674 | no biological data available	-
Copia1-I_DM	3L_23001467_SNP	N	2.11e-09	0.047	XLOC_015362			0	EXON	+
Copia1-I_DM	3L_23064611_INS	N	2.29e-07	0.047	Intergenic
Copia1-I_DM	3L_23064885_SNP	N	6.6e-08	0.047	Intergenic
Copia1-I_DM	3L_23238853_SNP	N	1.35e-08	0.047	FBgn0266347	nAChRalpha4	nicotinic Acetylcholine Receptor alpha4	0	INTRON	+	ion transport ; GO:0006811 | inferred from electronic annotation with InterPro:IPR002394, InterPro:IPR006029, InterPro:IPR006201, InterPro:IPR018000 <newline> sleep ; GO:0030431 | inferred from mutant phenotype	acetylcholine-gated channel complex ; GO:0005892 | inferred from sequence or structural similarity <newline> acetylcholine-gated channel complex ; GO:0005892 | inferred from direct assay <newline> acetylcholine-gated channel complex ; GO:0005892 | inferred from sequence or structural similarity with EMBL:AJ000390; protein_id:CAA04052 <newline> postsynaptic membrane ; GO:0045211 | inferred from el…	acetylcholine-activated cation-selective channel activity ; GO:0004889 | inferred from sequence or structural similarity <newline> acetylcholine receptor activity ; GO:0015464 | inferred from direct assay contributes_to <newline> acetylcholine-activated cation-selective channel activity ; GO:0004889 | inferred from sequence or structural similarity with EMBL:AJ000390; protein_id:CAA04052	Hsap\CHRNA9 <newline> Hsap\CHRFAM7A <newline> Hsap\CHRNA5 <newline> Hsap\ENSG00000080644 <newline> Hsap\CHRNA1 <newline> Hsap\CHRNA6 <newline> Hsap\CHRNB4 <newline> Hsap\CHRNA7 <newline> Hsap\CHRNA2 <newline> Hsap\CHRNB2 <newline> Hsap\CHRNA4 <newline> Hsap\CHRNA10
Copia1-I_DM	3L_23238853_SNP	N	1.35e-08	0.047	XLOC_015405			0	EXON	+
Copia1-I_DM	3L_23272701_SNP	N	4.07e-09	0.047	FBgn0266347	nAChRalpha4	nicotinic Acetylcholine Receptor alpha4	0	INTRON	+	ion transport ; GO:0006811 | inferred from electronic annotation with InterPro:IPR002394, InterPro:IPR006029, InterPro:IPR006201, InterPro:IPR018000 <newline> sleep ; GO:0030431 | inferred from mutant phenotype	acetylcholine-gated channel complex ; GO:0005892 | inferred from sequence or structural similarity <newline> acetylcholine-gated channel complex ; GO:0005892 | inferred from direct assay <newline> acetylcholine-gated channel complex ; GO:0005892 | inferred from sequence or structural similarity with EMBL:AJ000390; protein_id:CAA04052 <newline> postsynaptic membrane ; GO:0045211 | inferred from el…	acetylcholine-activated cation-selective channel activity ; GO:0004889 | inferred from sequence or structural similarity <newline> acetylcholine receptor activity ; GO:0015464 | inferred from direct assay contributes_to <newline> acetylcholine-activated cation-selective channel activity ; GO:0004889 | inferred from sequence or structural similarity with EMBL:AJ000390; protein_id:CAA04052	Hsap\CHRNA9 <newline> Hsap\CHRFAM7A <newline> Hsap\CHRNA5 <newline> Hsap\ENSG00000080644 <newline> Hsap\CHRNA1 <newline> Hsap\CHRNA6 <newline> Hsap\CHRNB4 <newline> Hsap\CHRNA7 <newline> Hsap\CHRNA2 <newline> Hsap\CHRNB2 <newline> Hsap\CHRNA4 <newline> Hsap\CHRNA10
Copia1-I_DM	3L_23332861_SNP	N	2.3e-09	0.047	FBgn0052230	CG32230	CG32230	0	INTRON	+	mitochondrial electron transport, NADH to ubiquinone ; GO:0006120 | inferred from sequence or structural similarity with UniProtKB:O00483	mitochondrial respiratory chain complex I ; GO:0005747 | inferred from sequence or structural similarity with UniProtKB:O00483	NADH dehydrogenase activity ; GO:0003954 | inferred from sequence or structural similarity with UniProtKB:O00483	Hsap\NDUFA4 <newline> Hsap\NDUFA4L2
Copia1-I_DM	3L_23462256_SNP	N	3.11e-09	0.047	Intergenic
Copia1-I_DM	3L_23462256_SNP	N	3.11e-09	0.047	Intergenic
Copia1-I_DM	3L_23462256_SNP	N	3.11e-09	0.047	Intergenic
DMLTR5	2L_18505240_DEL	N	2.16e-08	0.03	Intergenic
DMLTR5	3R_10057021_SNP	Y	6.69e-09	0.03	Intergenic
DOC	2R_3725850_SNP	N	6.27e-07	0.05	FBgn0085390	Dgk	Diacyl glycerol kinase	0	INTRON	-	phosphorylation ; GO:0016310 | inferred from direct assay <newline> phosphorylation ; GO:0016310 | non-traceable author statement <newline> phosphatidylinositol biosynthetic process ; GO:0006661 | non-traceable author statement <newline> protein kinase C deactivation ; GO:0042313 | non-traceable author statement <newline> protein kinase C-activating G-protein coupled receptor signaling pathway ; …	-	diacylglycerol kinase activity ; GO:0004143 | inferred from direct assay <newline> diacylglycerol kinase activity ; GO:0004143 | non-traceable author statement <newline> calcium ion binding ; GO:0005509 | inferred from electronic annotation with InterPro:IPR002048, InterPro:IPR011992 <newline> NAD+ kinase activity ; GO:0003951 | inferred from electronic annotation with InterPro:IPR016064	Hsap\DGKB <newline> Hsap\DGKA <newline> Hsap\DGKG
DOC	2L_1355283_SNP	N	6.27e-07	0.05	FBgn0031335	CG5565	CG5565	0	EXON	-	metabolic process ; GO:0008152 | inferred from electronic annotation with InterPro:IPR006439	-	hydrolase activity ; GO:0016787 | inferred from electronic annotation with InterPro:IPR006439	Hsap\HDHD1
DOC	2L_1355283_SNP	N	6.27e-07	0.05	FBgn0051924	CG31924	CG31924	364	5PRIME	-	metabolic process ; GO:0008152 | inferred from electronic annotation with InterPro:IPR006439	-	hydrolase activity ; GO:0016787 | inferred from sequence or structural similarity with InterPro:IPR005834	Hsap\HDHD1
DOC	2L_1355311_SNP	N	5.24e-07	0.05	FBgn0031335	CG5565	CG5565	0	EXON	-	metabolic process ; GO:0008152 | inferred from electronic annotation with InterPro:IPR006439	-	hydrolase activity ; GO:0016787 | inferred from electronic annotation with InterPro:IPR006439	Hsap\HDHD1
DOC	2L_1355311_SNP	N	5.24e-07	0.05	FBgn0051924	CG31924	CG31924	392	5PRIME	-	metabolic process ; GO:0008152 | inferred from electronic annotation with InterPro:IPR006439	-	hydrolase activity ; GO:0016787 | inferred from sequence or structural similarity with InterPro:IPR005834	Hsap\HDHD1
DOC	2L_1355693_SNP	N	8.29e-07	0.05	FBgn0031335	CG5565	CG5565	0	INTRON	-	metabolic process ; GO:0008152 | inferred from electronic annotation with InterPro:IPR006439	-	hydrolase activity ; GO:0016787 | inferred from electronic annotation with InterPro:IPR006439	Hsap\HDHD1
DOC	2L_1355693_SNP	N	8.29e-07	0.05	FBgn0051924	CG31924	CG31924	774	5PRIME	-	metabolic process ; GO:0008152 | inferred from electronic annotation with InterPro:IPR006439	-	hydrolase activity ; GO:0016787 | inferred from sequence or structural similarity with InterPro:IPR005834	Hsap\HDHD1
DOC	2L_2502269_SNP	Y	1.22e-07	0.05	Intergenic
DOC	2L_7961713_SNP	N	8.05e-07	0.05	FBgn0085450	Snoo	Sno oncogene	0	INTRON	-	negative regulation of transforming growth factor beta receptor signaling pathway ; GO:0030512 | inferred from genetic interaction with babo inferred from genetic interaction with tkv <newline> neuron development ; GO:0048666 | inferred from mutant phenotype <newline> negative regulation of decapentaplegic signaling pathway ; GO:0090099 | inferred from direct assay inferred from mutant phenotype …	nucleus ; GO:0005634 | inferred from sequence or structural similarity with MGD:Ski; MGI:MGI:98310 <newline> nucleus ; GO:0005634 | inferred from direct assay <newline> cytoplasm ; GO:0005737 | inferred from direct assay	SMAD binding ; GO:0046332 | inferred from biological aspect of ancestor with PANTHER:PTN000000299	-
DOC	3R_21109500_SNP	N	4.35e-07	0.05	FBgn0039313	CG11892	CG11892	541	3PRIME	+	-	-	transferase activity, transferring phosphorus-containing groups ; GO:0016772 | inferred from electronic annotation with InterPro:IPR011009	-
DOC	3R_21109500_SNP	N	4.35e-07	0.05	FBgn0051300	CG31300	CG31300	0	EXON	+	-	-	transferase activity, transferring phosphorus-containing groups ; GO:0016772 | inferred from electronic annotation with InterPro:IPR011009	-
DOC	3R_21148732_SNP	N	1.44e-07	0.05	FBgn0039326	CG10562	CG10562	253	5PRIME	-	-	-	transferase activity, transferring phosphorus-containing groups ; GO:0016772 | inferred from electronic annotation with InterPro:IPR011009	-
DOC	3R_21148732_SNP	N	1.44e-07	0.05	FBgn0045761	CHKov1	CHKov1	146	3PRIME	-	RNA-dependent DNA replication ; GO:0006278 | inferred from electronic annotation with InterPro:IPR000477	-	RNA-directed DNA polymerase activity ; GO:0003964 | inferred from electronic annotation with InterPro:IPR000477 <newline> RNA binding ; GO:0003723 | inferred from electronic annotation with InterPro:IPR000477	-
DOC	3R_21148989_SNP	N	2.03e-07	0.05	FBgn0039326	CG10562	CG10562	510	5PRIME	-	-	-	transferase activity, transferring phosphorus-containing groups ; GO:0016772 | inferred from electronic annotation with InterPro:IPR011009	-
DOC	3R_21148989_SNP	N	2.03e-07	0.05	FBgn0045761	CHKov1	CHKov1	0	EXON	-	RNA-dependent DNA replication ; GO:0006278 | inferred from electronic annotation with InterPro:IPR000477	-	RNA-directed DNA polymerase activity ; GO:0003964 | inferred from electronic annotation with InterPro:IPR000477 <newline> RNA binding ; GO:0003723 | inferred from electronic annotation with InterPro:IPR000477	-
DOC	3R_21149371_SNP	N	1.2e-07	0.05	FBgn0039326	CG10562	CG10562	892	5PRIME	-	-	-	transferase activity, transferring phosphorus-containing groups ; GO:0016772 | inferred from electronic annotation with InterPro:IPR011009	-
DOC	3R_21149371_SNP	N	1.2e-07	0.05	FBgn0045761	CHKov1	CHKov1	0	EXON	-	RNA-dependent DNA replication ; GO:0006278 | inferred from electronic annotation with InterPro:IPR000477	-	RNA-directed DNA polymerase activity ; GO:0003964 | inferred from electronic annotation with InterPro:IPR000477 <newline> RNA binding ; GO:0003723 | inferred from electronic annotation with InterPro:IPR000477	-
DOC	3R_21149510_SNP	N	5.62e-09	0.05	FBgn0045761	CHKov1	CHKov1	0	EXON	-	RNA-dependent DNA replication ; GO:0006278 | inferred from electronic annotation with InterPro:IPR000477	-	RNA-directed DNA polymerase activity ; GO:0003964 | inferred from electronic annotation with InterPro:IPR000477 <newline> RNA binding ; GO:0003723 | inferred from electronic annotation with InterPro:IPR000477	-
DOC	3R_21149531_SNP	N	1.36e-08	0.05	FBgn0045761	CHKov1	CHKov1	0	EXON	-	RNA-dependent DNA replication ; GO:0006278 | inferred from electronic annotation with InterPro:IPR000477	-	RNA-directed DNA polymerase activity ; GO:0003964 | inferred from electronic annotation with InterPro:IPR000477 <newline> RNA binding ; GO:0003723 | inferred from electronic annotation with InterPro:IPR000477	-
DOC	3R_21149540_SNP	N	9.54e-09	0.05	FBgn0045761	CHKov1	CHKov1	0	EXON	-	RNA-dependent DNA replication ; GO:0006278 | inferred from electronic annotation with InterPro:IPR000477	-	RNA-directed DNA polymerase activity ; GO:0003964 | inferred from electronic annotation with InterPro:IPR000477 <newline> RNA binding ; GO:0003723 | inferred from electronic annotation with InterPro:IPR000477	-
DOC	3R_21149705_SNP	N	2.56e-10	0.05	FBgn0045761	CHKov1	CHKov1	0	INTRON	-	RNA-dependent DNA replication ; GO:0006278 | inferred from electronic annotation with InterPro:IPR000477	-	RNA-directed DNA polymerase activity ; GO:0003964 | inferred from electronic annotation with InterPro:IPR000477 <newline> RNA binding ; GO:0003723 | inferred from electronic annotation with InterPro:IPR000477	-
DOC	3R_21149731_SNP	Y	1.37e-12	0.05	FBgn0045761	CHKov1	CHKov1	0	EXON	-	RNA-dependent DNA replication ; GO:0006278 | inferred from electronic annotation with InterPro:IPR000477	-	RNA-directed DNA polymerase activity ; GO:0003964 | inferred from electronic annotation with InterPro:IPR000477 <newline> RNA binding ; GO:0003723 | inferred from electronic annotation with InterPro:IPR000477	-
DOC	3R_21149736_SNP	N	7.33e-09	0.05	FBgn0045761	CHKov1	CHKov1	0	EXON	-	RNA-dependent DNA replication ; GO:0006278 | inferred from electronic annotation with InterPro:IPR000477	-	RNA-directed DNA polymerase activity ; GO:0003964 | inferred from electronic annotation with InterPro:IPR000477 <newline> RNA binding ; GO:0003723 | inferred from electronic annotation with InterPro:IPR000477	-
DOC	3R_21149845_SNP	N	8.06e-09	0.05	FBgn0045761	CHKov1	CHKov1	0	EXON	-	RNA-dependent DNA replication ; GO:0006278 | inferred from electronic annotation with InterPro:IPR000477	-	RNA-directed DNA polymerase activity ; GO:0003964 | inferred from electronic annotation with InterPro:IPR000477 <newline> RNA binding ; GO:0003723 | inferred from electronic annotation with InterPro:IPR000477	-
DOC	3R_21149866_SNP	N	9.73e-10	0.05	FBgn0045761	CHKov1	CHKov1	0	EXON	-	RNA-dependent DNA replication ; GO:0006278 | inferred from electronic annotation with InterPro:IPR000477	-	RNA-directed DNA polymerase activity ; GO:0003964 | inferred from electronic annotation with InterPro:IPR000477 <newline> RNA binding ; GO:0003723 | inferred from electronic annotation with InterPro:IPR000477	-
DOC	3R_21149884_SNP	N	1.11e-09	0.05	FBgn0045761	CHKov1	CHKov1	0	EXON	-	RNA-dependent DNA replication ; GO:0006278 | inferred from electronic annotation with InterPro:IPR000477	-	RNA-directed DNA polymerase activity ; GO:0003964 | inferred from electronic annotation with InterPro:IPR000477 <newline> RNA binding ; GO:0003723 | inferred from electronic annotation with InterPro:IPR000477	-
DOC	3R_21154668_SNP	N	5.14e-10	0.05	FBgn0039328	CHKov2	CHKov2	584	3PRIME	-	-	-	transferase activity, transferring phosphorus-containing groups ; GO:0016772 | inferred from electronic annotation with InterPro:IPR011009	-
DOC	3R_21154668_SNP	N	5.14e-10	0.05	FBgn0045761	CHKov1	CHKov1	0	EXON	-	RNA-dependent DNA replication ; GO:0006278 | inferred from electronic annotation with InterPro:IPR000477	-	RNA-directed DNA polymerase activity ; GO:0003964 | inferred from electronic annotation with InterPro:IPR000477 <newline> RNA binding ; GO:0003723 | inferred from electronic annotation with InterPro:IPR000477	-
DOC	3R_21154676_SNP	N	1.38e-09	0.05	FBgn0039328	CHKov2	CHKov2	576	3PRIME	-	-	-	transferase activity, transferring phosphorus-containing groups ; GO:0016772 | inferred from electronic annotation with InterPro:IPR011009	-
DOC	3R_21154676_SNP	N	1.38e-09	0.05	FBgn0045761	CHKov1	CHKov1	0	EXON	-	RNA-dependent DNA replication ; GO:0006278 | inferred from electronic annotation with InterPro:IPR000477	-	RNA-directed DNA polymerase activity ; GO:0003964 | inferred from electronic annotation with InterPro:IPR000477 <newline> RNA binding ; GO:0003723 | inferred from electronic annotation with InterPro:IPR000477	-
DOC	3R_21154682_SNP	N	1.28e-09	0.05	FBgn0039328	CHKov2	CHKov2	570	3PRIME	-	-	-	transferase activity, transferring phosphorus-containing groups ; GO:0016772 | inferred from electronic annotation with InterPro:IPR011009	-
DOC	3R_21154682_SNP	N	1.28e-09	0.05	FBgn0045761	CHKov1	CHKov1	0	EXON	-	RNA-dependent DNA replication ; GO:0006278 | inferred from electronic annotation with InterPro:IPR000477	-	RNA-directed DNA polymerase activity ; GO:0003964 | inferred from electronic annotation with InterPro:IPR000477 <newline> RNA binding ; GO:0003723 | inferred from electronic annotation with InterPro:IPR000477	-
DOC	3R_21154707_SNP	N	6.36e-10	0.05	FBgn0039328	CHKov2	CHKov2	545	3PRIME	-	-	-	transferase activity, transferring phosphorus-containing groups ; GO:0016772 | inferred from electronic annotation with InterPro:IPR011009	-
DOC	3R_21154707_SNP	N	6.36e-10	0.05	FBgn0045761	CHKov1	CHKov1	0	EXON	-	RNA-dependent DNA replication ; GO:0006278 | inferred from electronic annotation with InterPro:IPR000477	-	RNA-directed DNA polymerase activity ; GO:0003964 | inferred from electronic annotation with InterPro:IPR000477 <newline> RNA binding ; GO:0003723 | inferred from electronic annotation with InterPro:IPR000477	-
DOC	3R_21155002_SNP	N	1.98e-08	0.05	FBgn0039328	CHKov2	CHKov2	250	3PRIME	-	-	-	transferase activity, transferring phosphorus-containing groups ; GO:0016772 | inferred from electronic annotation with InterPro:IPR011009	-
DOC	3R_21155002_SNP	N	1.98e-08	0.05	FBgn0045761	CHKov1	CHKov1	0	EXON	-	RNA-dependent DNA replication ; GO:0006278 | inferred from electronic annotation with InterPro:IPR000477	-	RNA-directed DNA polymerase activity ; GO:0003964 | inferred from electronic annotation with InterPro:IPR000477 <newline> RNA binding ; GO:0003723 | inferred from electronic annotation with InterPro:IPR000477	-
DOC	3R_21155496_SNP	N	3.85e-11	0.05	FBgn0039328	CHKov2	CHKov2	0	EXON	-	-	-	transferase activity, transferring phosphorus-containing groups ; GO:0016772 | inferred from electronic annotation with InterPro:IPR011009	-
DOC	3R_21155496_SNP	N	3.85e-11	0.05	FBgn0045761	CHKov1	CHKov1	458	5PRIME	-	RNA-dependent DNA replication ; GO:0006278 | inferred from electronic annotation with InterPro:IPR000477	-	RNA-directed DNA polymerase activity ; GO:0003964 | inferred from electronic annotation with InterPro:IPR000477 <newline> RNA binding ; GO:0003723 | inferred from electronic annotation with InterPro:IPR000477	-
DOC	3R_21155502_SNP	N	3.13e-08	0.05	FBgn0039328	CHKov2	CHKov2	0	EXON	-	-	-	transferase activity, transferring phosphorus-containing groups ; GO:0016772 | inferred from electronic annotation with InterPro:IPR011009	-
DOC	3R_21155502_SNP	N	3.13e-08	0.05	FBgn0045761	CHKov1	CHKov1	464	5PRIME	-	RNA-dependent DNA replication ; GO:0006278 | inferred from electronic annotation with InterPro:IPR000477	-	RNA-directed DNA polymerase activity ; GO:0003964 | inferred from electronic annotation with InterPro:IPR000477 <newline> RNA binding ; GO:0003723 | inferred from electronic annotation with InterPro:IPR000477	-
DOC	3R_21155551_SNP	N	2.01e-12	0.05	FBgn0039328	CHKov2	CHKov2	0	EXON	-	-	-	transferase activity, transferring phosphorus-containing groups ; GO:0016772 | inferred from electronic annotation with InterPro:IPR011009	-
DOC	3R_21155551_SNP	N	2.01e-12	0.05	FBgn0045761	CHKov1	CHKov1	513	5PRIME	-	RNA-dependent DNA replication ; GO:0006278 | inferred from electronic annotation with InterPro:IPR000477	-	RNA-directed DNA polymerase activity ; GO:0003964 | inferred from electronic annotation with InterPro:IPR000477 <newline> RNA binding ; GO:0003723 | inferred from electronic annotation with InterPro:IPR000477	-
DOC	3R_21155632_SNP	N	4.92e-10	0.05	FBgn0039328	CHKov2	CHKov2	0	INTRON	-	-	-	transferase activity, transferring phosphorus-containing groups ; GO:0016772 | inferred from electronic annotation with InterPro:IPR011009	-
DOC	3R_21155632_SNP	N	4.92e-10	0.05	FBgn0045761	CHKov1	CHKov1	594	5PRIME	-	RNA-dependent DNA replication ; GO:0006278 | inferred from electronic annotation with InterPro:IPR000477	-	RNA-directed DNA polymerase activity ; GO:0003964 | inferred from electronic annotation with InterPro:IPR000477 <newline> RNA binding ; GO:0003723 | inferred from electronic annotation with InterPro:IPR000477	-
DOC	3R_21155823_SNP	N	1.82e-09	0.05	FBgn0039328	CHKov2	CHKov2	0	EXON	-	-	-	transferase activity, transferring phosphorus-containing groups ; GO:0016772 | inferred from electronic annotation with InterPro:IPR011009	-
DOC	3R_21155823_SNP	N	1.82e-09	0.05	FBgn0045761	CHKov1	CHKov1	785	5PRIME	-	RNA-dependent DNA replication ; GO:0006278 | inferred from electronic annotation with InterPro:IPR000477	-	RNA-directed DNA polymerase activity ; GO:0003964 | inferred from electronic annotation with InterPro:IPR000477 <newline> RNA binding ; GO:0003723 | inferred from electronic annotation with InterPro:IPR000477	-
DOC	3R_21155841_SNP	N	3.35e-08	0.05	FBgn0039328	CHKov2	CHKov2	0	EXON	-	-	-	transferase activity, transferring phosphorus-containing groups ; GO:0016772 | inferred from electronic annotation with InterPro:IPR011009	-
DOC	3R_21155841_SNP	N	3.35e-08	0.05	FBgn0045761	CHKov1	CHKov1	803	5PRIME	-	RNA-dependent DNA replication ; GO:0006278 | inferred from electronic annotation with InterPro:IPR000477	-	RNA-directed DNA polymerase activity ; GO:0003964 | inferred from electronic annotation with InterPro:IPR000477 <newline> RNA binding ; GO:0003723 | inferred from electronic annotation with InterPro:IPR000477	-
DOC	3R_21155871_SNP	N	7.46e-09	0.05	FBgn0039328	CHKov2	CHKov2	0	INTRON	-	-	-	transferase activity, transferring phosphorus-containing groups ; GO:0016772 | inferred from electronic annotation with InterPro:IPR011009	-
DOC	3R_21155871_SNP	N	7.46e-09	0.05	FBgn0045761	CHKov1	CHKov1	833	5PRIME	-	RNA-dependent DNA replication ; GO:0006278 | inferred from electronic annotation with InterPro:IPR000477	-	RNA-directed DNA polymerase activity ; GO:0003964 | inferred from electronic annotation with InterPro:IPR000477 <newline> RNA binding ; GO:0003723 | inferred from electronic annotation with InterPro:IPR000477	-
DOC	3R_21155908_SNP	N	2.93e-10	0.05	FBgn0039328	CHKov2	CHKov2	0	INTRON	-	-	-	transferase activity, transferring phosphorus-containing groups ; GO:0016772 | inferred from electronic annotation with InterPro:IPR011009	-
DOC	3R_21155908_SNP	N	2.93e-10	0.05	FBgn0045761	CHKov1	CHKov1	870	5PRIME	-	RNA-dependent DNA replication ; GO:0006278 | inferred from electronic annotation with InterPro:IPR000477	-	RNA-directed DNA polymerase activity ; GO:0003964 | inferred from electronic annotation with InterPro:IPR000477 <newline> RNA binding ; GO:0003723 | inferred from electronic annotation with InterPro:IPR000477	-
DOC	3R_21155915_SNP	N	6.5e-09	0.05	FBgn0039328	CHKov2	CHKov2	0	INTRON	-	-	-	transferase activity, transferring phosphorus-containing groups ; GO:0016772 | inferred from electronic annotation with InterPro:IPR011009	-
DOC	3R_21155915_SNP	N	6.5e-09	0.05	FBgn0045761	CHKov1	CHKov1	877	5PRIME	-	RNA-dependent DNA replication ; GO:0006278 | inferred from electronic annotation with InterPro:IPR000477	-	RNA-directed DNA polymerase activity ; GO:0003964 | inferred from electronic annotation with InterPro:IPR000477 <newline> RNA binding ; GO:0003723 | inferred from electronic annotation with InterPro:IPR000477	-
DOC	3R_21155975_SNP	N	1.69e-08	0.05	FBgn0039328	CHKov2	CHKov2	0	EXON	-	-	-	transferase activity, transferring phosphorus-containing groups ; GO:0016772 | inferred from electronic annotation with InterPro:IPR011009	-
DOC	3R_21155975_SNP	N	1.69e-08	0.05	FBgn0045761	CHKov1	CHKov1	937	5PRIME	-	RNA-dependent DNA replication ; GO:0006278 | inferred from electronic annotation with InterPro:IPR000477	-	RNA-directed DNA polymerase activity ; GO:0003964 | inferred from electronic annotation with InterPro:IPR000477 <newline> RNA binding ; GO:0003723 | inferred from electronic annotation with InterPro:IPR000477	-
DOC	3R_21156328_SNP	N	1.47e-07	0.05	FBgn0039328	CHKov2	CHKov2	0	EXON	-	-	-	transferase activity, transferring phosphorus-containing groups ; GO:0016772 | inferred from electronic annotation with InterPro:IPR011009	-
DOC	3R_21156328_SNP	N	1.47e-07	0.05	FBgn0039329	CG10669	CG10669	757	3PRIME	-	-	nucleus ; GO:0005634 | inferred from electronic annotation with InterPro:IPR012934	zinc ion binding ; GO:0008270 | inferred from electronic annotation with InterPro:IPR007087, InterPro:IPR012934, InterPro:IPR015880 <newline> nucleic acid binding ; GO:0003676 | inferred from electronic annotation with InterPro:IPR013087	-
DOC	3R_21156681_SNP	N	4.97e-07	0.05	FBgn0039328	CHKov2	CHKov2	0	INTRON	-	-	-	transferase activity, transferring phosphorus-containing groups ; GO:0016772 | inferred from electronic annotation with InterPro:IPR011009	-
DOC	3R_21156681_SNP	N	4.97e-07	0.05	FBgn0039329	CG10669	CG10669	404	3PRIME	-	-	nucleus ; GO:0005634 | inferred from electronic annotation with InterPro:IPR012934	zinc ion binding ; GO:0008270 | inferred from electronic annotation with InterPro:IPR007087, InterPro:IPR012934, InterPro:IPR015880 <newline> nucleic acid binding ; GO:0003676 | inferred from electronic annotation with InterPro:IPR013087	-
DOC	3R_21156730_SNP	N	4.02e-07	0.05	FBgn0039328	CHKov2	CHKov2	0	EXON	-	-	-	transferase activity, transferring phosphorus-containing groups ; GO:0016772 | inferred from electronic annotation with InterPro:IPR011009	-
DOC	3R_21156730_SNP	N	4.02e-07	0.05	FBgn0039329	CG10669	CG10669	355	3PRIME	-	-	nucleus ; GO:0005634 | inferred from electronic annotation with InterPro:IPR012934	zinc ion binding ; GO:0008270 | inferred from electronic annotation with InterPro:IPR007087, InterPro:IPR012934, InterPro:IPR015880 <newline> nucleic acid binding ; GO:0003676 | inferred from electronic annotation with InterPro:IPR013087	-
DOC	3R_21156976_SNP	N	1.99e-07	0.05	FBgn0039328	CHKov2	CHKov2	51	5PRIME	-	-	-	transferase activity, transferring phosphorus-containing groups ; GO:0016772 | inferred from electronic annotation with InterPro:IPR011009	-
DOC	3R_21156976_SNP	N	1.99e-07	0.05	FBgn0039329	CG10669	CG10669	109	3PRIME	-	-	nucleus ; GO:0005634 | inferred from electronic annotation with InterPro:IPR012934	zinc ion binding ; GO:0008270 | inferred from electronic annotation with InterPro:IPR007087, InterPro:IPR012934, InterPro:IPR015880 <newline> nucleic acid binding ; GO:0003676 | inferred from electronic annotation with InterPro:IPR013087	-
DOC	3R_21157255_SNP	N	5.15e-07	0.05	FBgn0039328	CHKov2	CHKov2	330	5PRIME	-	-	-	transferase activity, transferring phosphorus-containing groups ; GO:0016772 | inferred from electronic annotation with InterPro:IPR011009	-
DOC	3R_21157255_SNP	N	5.15e-07	0.05	FBgn0039329	CG10669	CG10669	0	EXON	-	-	nucleus ; GO:0005634 | inferred from electronic annotation with InterPro:IPR012934	zinc ion binding ; GO:0008270 | inferred from electronic annotation with InterPro:IPR007087, InterPro:IPR012934, InterPro:IPR015880 <newline> nucleic acid binding ; GO:0003676 | inferred from electronic annotation with InterPro:IPR013087	-
DOC	3R_21157257_SNP	N	9.06e-08	0.05	FBgn0039328	CHKov2	CHKov2	332	5PRIME	-	-	-	transferase activity, transferring phosphorus-containing groups ; GO:0016772 | inferred from electronic annotation with InterPro:IPR011009	-
DOC	3R_21157257_SNP	N	9.06e-08	0.05	FBgn0039329	CG10669	CG10669	0	EXON	-	-	nucleus ; GO:0005634 | inferred from electronic annotation with InterPro:IPR012934	zinc ion binding ; GO:0008270 | inferred from electronic annotation with InterPro:IPR007087, InterPro:IPR012934, InterPro:IPR015880 <newline> nucleic acid binding ; GO:0003676 | inferred from electronic annotation with InterPro:IPR013087	-
DOC	3R_21157887_SNP	N	5.56e-07	0.05	FBgn0039328	CHKov2	CHKov2	962	5PRIME	-	-	-	transferase activity, transferring phosphorus-containing groups ; GO:0016772 | inferred from electronic annotation with InterPro:IPR011009	-
DOC	3R_21157887_SNP	N	5.56e-07	0.05	FBgn0039329	CG10669	CG10669	0	EXON	-	-	nucleus ; GO:0005634 | inferred from electronic annotation with InterPro:IPR012934	zinc ion binding ; GO:0008270 | inferred from electronic annotation with InterPro:IPR007087, InterPro:IPR012934, InterPro:IPR015880 <newline> nucleic acid binding ; GO:0003676 | inferred from electronic annotation with InterPro:IPR013087	-
DOC	3R_21162806_SNP	N	7.82e-07	0.05	FBgn0028647	CG11902	CG11902	0	EXON	+	-	nucleus ; GO:0005634 | inferred from electronic annotation with InterPro:IPR012934	zinc ion binding ; GO:0008270 | inferred from electronic annotation with InterPro:IPR007087, InterPro:IPR012934, InterPro:IPR015880 <newline> nucleic acid binding ; GO:0003676 | inferred from electronic annotation with InterPro:IPR013087	-
DOC	3R_21167748_SNP	N	1.34e-06	0.05	FBgn0027376	rha	rha	0	EXON	+	-	chromosome ; GO:0005694 | non-traceable author statement	-	-
DOC	3R_21167838_SNP	N	5.24e-07	0.05	FBgn0027376	rha	rha	0	EXON	+	-	chromosome ; GO:0005694 | non-traceable author statement	-	-
DOC	3R_21167891_SNP	N	7.93e-07	0.05	FBgn0027376	rha	rha	0	EXON	+	-	chromosome ; GO:0005694 | non-traceable author statement	-	-
DOC	3R_21168300_SNP	N	1.1e-06	0.05	FBgn0027376	rha	rha	0	EXON	+	-	chromosome ; GO:0005694 | non-traceable author statement	-	-
DOC	3R_21168506_SNP	N	6.89e-08	0.05	FBgn0027376	rha	rha	0	EXON	+	-	chromosome ; GO:0005694 | non-traceable author statement	-	-
DOC	3R_21168522_SNP	N	3.21e-08	0.05	FBgn0027376	rha	rha	0	EXON	+	-	chromosome ; GO:0005694 | non-traceable author statement	-	-
DOC	3R_21168612_SNP	N	1.17e-08	0.05	FBgn0027376	rha	rha	0	EXON	+	-	chromosome ; GO:0005694 | non-traceable author statement	-	-
DOC	3R_21168623_DEL	N	2.26e-07	0.05	FBgn0027376	rha	rha	0	EXON	+	-	chromosome ; GO:0005694 | non-traceable author statement	-	-
DOC	3R_21168713_SNP	N	4.37e-09	0.05	FBgn0027376	rha	rha	0	EXON	+	-	chromosome ; GO:0005694 | non-traceable author statement	-	-
DOC	3R_21168828_SNP	N	1.86e-07	0.05	FBgn0027376	rha	rha	0	EXON	+	-	chromosome ; GO:0005694 | non-traceable author statement	-	-
DOC	3R_21168881_SNP	N	1.08e-07	0.05	FBgn0027376	rha	rha	0	EXON	+	-	chromosome ; GO:0005694 | non-traceable author statement	-	-
DOC	3R_21169022_SNP	N	9.21e-09	0.05	FBgn0027376	rha	rha	0	EXON	+	-	chromosome ; GO:0005694 | non-traceable author statement	-	-
DOC	3R_21169061_SNP	N	2.08e-07	0.05	FBgn0027376	rha	rha	0	EXON	+	-	chromosome ; GO:0005694 | non-traceable author statement	-	-
DOC	3R_21169106_SNP	N	6.52e-07	0.05	FBgn0027376	rha	rha	0	EXON	+	-	chromosome ; GO:0005694 | non-traceable author statement	-	-
DOC	3R_21169438_SNP	N	5.78e-09	0.05	FBgn0027376	rha	rha	0	EXON	+	-	chromosome ; GO:0005694 | non-traceable author statement	-	-
DOC	3R_21169440_SNP	N	1.31e-07	0.05	FBgn0027376	rha	rha	0	EXON	+	-	chromosome ; GO:0005694 | non-traceable author statement	-	-
DOC	3R_21169507_SNP	N	1.41e-06	0.05	FBgn0027376	rha	rha	0	EXON	+	-	chromosome ; GO:0005694 | non-traceable author statement	-	-
DOC	3R_21169507_SNP	N	1.41e-06	0.05	FBgn0261575	tobi	target of brain insulin	976	3PRIME	-	carbohydrate metabolic process ; GO:0005975 | inferred from electronic annotation with InterPro:IPR000322	glucosidase II complex ; GO:0017177 | inferred from sequence or structural similarity with EMBL:AJ000332; protein_id:CAA04006	alpha-glucosidase activity ; GO:0004558 | inferred from sequence or structural similarity with EMBL:AJ000332; protein_id:CAA04006	-
DOC	3R_21169523_SNP	N	3.08e-07	0.05	FBgn0027376	rha	rha	0	EXON	+	-	chromosome ; GO:0005694 | non-traceable author statement	-	-
DOC	3R_21169523_SNP	N	3.08e-07	0.05	FBgn0261575	tobi	target of brain insulin	960	3PRIME	-	carbohydrate metabolic process ; GO:0005975 | inferred from electronic annotation with InterPro:IPR000322	glucosidase II complex ; GO:0017177 | inferred from sequence or structural similarity with EMBL:AJ000332; protein_id:CAA04006	alpha-glucosidase activity ; GO:0004558 | inferred from sequence or structural similarity with EMBL:AJ000332; protein_id:CAA04006	-
DOC	3R_21169599_SNP	N	7.29e-08	0.05	FBgn0027376	rha	rha	0	EXON	+	-	chromosome ; GO:0005694 | non-traceable author statement	-	-
DOC	3R_21169599_SNP	N	7.29e-08	0.05	FBgn0261575	tobi	target of brain insulin	884	3PRIME	-	carbohydrate metabolic process ; GO:0005975 | inferred from electronic annotation with InterPro:IPR000322	glucosidase II complex ; GO:0017177 | inferred from sequence or structural similarity with EMBL:AJ000332; protein_id:CAA04006	alpha-glucosidase activity ; GO:0004558 | inferred from sequence or structural similarity with EMBL:AJ000332; protein_id:CAA04006	-
DOC	3R_21169688_SNP	N	2.48e-09	0.05	FBgn0027376	rha	rha	0	EXON	+	-	chromosome ; GO:0005694 | non-traceable author statement	-	-
DOC	3R_21169688_SNP	N	2.48e-09	0.05	FBgn0261575	tobi	target of brain insulin	795	3PRIME	-	carbohydrate metabolic process ; GO:0005975 | inferred from electronic annotation with InterPro:IPR000322	glucosidase II complex ; GO:0017177 | inferred from sequence or structural similarity with EMBL:AJ000332; protein_id:CAA04006	alpha-glucosidase activity ; GO:0004558 | inferred from sequence or structural similarity with EMBL:AJ000332; protein_id:CAA04006	-
DOC	3R_21169874_SNP	N	7.39e-09	0.05	FBgn0027376	rha	rha	0	EXON	+	-	chromosome ; GO:0005694 | non-traceable author statement	-	-
DOC	3R_21169874_SNP	N	7.39e-09	0.05	FBgn0261575	tobi	target of brain insulin	609	3PRIME	-	carbohydrate metabolic process ; GO:0005975 | inferred from electronic annotation with InterPro:IPR000322	glucosidase II complex ; GO:0017177 | inferred from sequence or structural similarity with EMBL:AJ000332; protein_id:CAA04006	alpha-glucosidase activity ; GO:0004558 | inferred from sequence or structural similarity with EMBL:AJ000332; protein_id:CAA04006	-
DOC4_DM	X_8813692_SNP	N	1.48e-06	0.049	FBgn0261549	rdgA	retinal degeneration A	0	INTRON	+	phosphatidylinositol biosynthetic process ; GO:0006661 | traceable author statement <newline> deactivation of rhodopsin mediated signaling ; GO:0016059 | inferred from genetic interaction with trp <newline> rhodopsin mediated signaling pathway ; GO:0016056 | inferred from mutant phenotype <newline> phosphorylation ; GO:0016310 | non-traceable author statement <newline> actin filament organization…	membrane ; GO:0016020 | non-traceable author statement <newline> microtubule associated complex ; GO:0005875 | inferred from direct assay	diacylglycerol kinase activity ; GO:0004143 | traceable author statement <newline> diacylglycerol kinase activity ; GO:0004143 | non-traceable author statement <newline> diacylglycerol binding ; GO:0019992 | inferred from sequence or structural similarity with InterPro:IPR002219 <newline> diacylglycerol binding ; GO:0019992 | non-traceable author statement <newline> diacylglycerol kinase activity…	Hsap\DGKI <newline> Hsap\DGKZ
DOC4_DM	X_8813692_SNP	N	1.48e-06	0.049	FBgn0264942	CR44111	CR44111	0	EXON	-	-	-	-	-
DOC4_DM	2R_10037_SNP	N	1.5e-07	0.049	Intergenic
DOC4_DM	2R_10037_SNP	N	1.5e-07	0.049	Intergenic
DOC4_DM	2R_10037_SNP	N	1.5e-07	0.049	Intergenic
DOC4_DM	2R_10037_SNP	N	1.5e-07	0.049	Intergenic
DOC4_DM	2R_16776_SNP	N	6.29e-13	0.049	Intergenic
DOC4_DM	2R_17539_SNP	N	1.98e-08	0.049	FBgn0262115	CG17683	CG17683	940	5PRIME	+	neurogenesis ; GO:0022008 | inferred from mutant phenotype	-	-	Hsap\NARFL
DOC4_DM	2R_18046_SNP	N	1.31e-13	0.049	FBgn0262115	CG17683	CG17683	433	5PRIME	+	neurogenesis ; GO:0022008 | inferred from mutant phenotype	-	-	Hsap\NARFL
DOC4_DM	2R_18542_SNP	N	3.13e-14	0.049	FBgn0262115	CG17683	CG17683	0	EXON	+	neurogenesis ; GO:0022008 | inferred from mutant phenotype	-	-	Hsap\NARFL
DOC4_DM	2R_18542_SNP	N	3.13e-14	0.049	Intergenic
DOC4_DM	2R_22557_SNP	N	3.34e-14	0.049	XLOC_006268			0	EXON	+
DOC4_DM	2R_23567_SNP	N	7.09e-07	0.049	XLOC_006268			0	EXON	+
DOC4_DM	2R_23617_SNP	N	2.9e-08	0.049	XLOC_006268			0	EXON	+
DOC4_DM	2R_24913_SNP	N	9.74e-08	0.049	XLOC_006268			165	3PRIME	+
DOC4_DM	2R_24913_SNP	N	9.74e-08	0.049	Intergenic
DOC4_DM	2R_24914_INS	N	1.39e-07	0.049	XLOC_006268			166	3PRIME	+
DOC4_DM	2R_24914_INS	N	1.39e-07	0.049	Intergenic
DOC4_DM	2R_27538_SNP	N	3.34e-14	0.049	Intergenic
DOC4_DM	2R_27538_SNP	N	3.34e-14	0.049	Intergenic
DOC4_DM	2R_42591_SNP	N	2.32e-13	0.049	Intergenic
DOC4_DM	2R_43301_SNP	N	1.1e-10	0.049	Intergenic
DOC4_DM	2R_43935_SNP	N	1.2e-13	0.049	Intergenic
DOC4_DM	2R_49559_SNP	N	6.56e-12	0.049	Intergenic
DOC4_DM	2R_49559_SNP	N	6.56e-12	0.049	XLOC_006275			945	5PRIME	+
DOC4_DM	2R_69324_SNP	N	4.05e-14	0.049	Intergenic
DOC4_DM	2R_76637_SNP	N	3.54e-12	0.049	Intergenic
DOC4_DM	2R_76637_SNP	N	3.54e-12	0.049	Intergenic
DOC4_DM	2R_77662_SNP	N	3.48e-12	0.049	Intergenic
DOC4_DM	2R_77662_SNP	N	3.48e-12	0.049	XLOC_006282			659	5PRIME	+
DOC4_DM	2R_77662_SNP	N	3.48e-12	0.049	Intergenic
DOC4_DM	2R_79459_SNP	N	7.58e-14	0.049	Intergenic
DOC4_DM	2R_79459_SNP	N	7.58e-14	0.049	XLOC_006282			0	EXON	+
DOC4_DM	2R_81413_SNP	N	5.57e-12	0.049	Intergenic
DOC4_DM	2R_81413_SNP	N	5.57e-12	0.049	XLOC_006282			0	INTRON	+
DOC4_DM	2R_84786_SNP	Y	4.71e-16	0.049	Intergenic
DOC4_DM	2R_84786_SNP	N	4.71e-16	0.049	XLOC_006282			0	INTRON	+
DOC4_DM	2R_84941_SNP	N	1.42e-13	0.049	Intergenic
DOC4_DM	2R_84941_SNP	N	1.42e-13	0.049	XLOC_006282			0	INTRON	+
DOC4_DM	2R_85949_SNP	N	2.28e-11	0.049	Intergenic
DOC4_DM	2R_85949_SNP	N	2.28e-11	0.049	XLOC_006282			0	INTRON	+
DOC4_DM	2R_88657_SNP	N	1.98e-10	0.049	Intergenic
DOC4_DM	2R_88657_SNP	N	1.98e-10	0.049	XLOC_006282			0	INTRON	+
DOC4_DM	2R_88691_SNP	N	5.77e-07	0.049	Intergenic
DOC4_DM	2R_88691_SNP	N	5.77e-07	0.049	XLOC_006282			0	INTRON	+
DOC4_DM	2R_89637_SNP	N	4.04e-13	0.049	Intergenic
DOC4_DM	2R_89637_SNP	N	4.04e-13	0.049	XLOC_006282			0	INTRON	+
DOC4_DM	2R_89754_SNP	N	2.93e-12	0.049	Intergenic
DOC4_DM	2R_89754_SNP	N	2.93e-12	0.049	XLOC_006282			0	INTRON	+
DOC4_DM	2R_90762_SNP	N	8.28e-15	0.049	Intergenic
DOC4_DM	2R_90762_SNP	N	8.28e-15	0.049	XLOC_006282			0	INTRON	+
DOC4_DM	2R_90762_SNP	N	8.28e-15	0.049	Intergenic
DOC4_DM	2R_92316_SNP	N	6.62e-15	0.049	Intergenic
DOC4_DM	2R_92316_SNP	N	6.62e-15	0.049	XLOC_006282			0	INTRON	+
DOC4_DM	2R_92316_SNP	N	6.62e-15	0.049	Intergenic
DOC4_DM	2R_92316_SNP	N	6.62e-15	0.049	Intergenic
DOC4_DM	2R_92523_INS	N	6.45e-09	0.049	XLOC_006282			0	INTRON	+
DOC4_DM	2R_92523_INS	N	6.45e-09	0.049	Intergenic
DOC4_DM	2R_92523_INS	N	6.45e-09	0.049	Intergenic
DOC4_DM	2R_92534_INS	N	1.23e-09	0.049	XLOC_006282			0	INTRON	+
DOC4_DM	2R_92534_INS	N	1.23e-09	0.049	Intergenic
DOC4_DM	2R_92534_INS	N	1.23e-09	0.049	Intergenic
DOC4_DM	2R_117314_SNP	N	1.8e-08	0.049	Intergenic
DOC4_DM	2R_117319_SNP	N	1.35e-07	0.049	Intergenic
DOC4_DM	2R_117363_SNP	N	8.17e-07	0.049	Intergenic
DOC4_DM	2R_117380_SNP	N	2.22e-07	0.049	Intergenic
DOC4_DM	2R_119253_SNP	N	1.46e-13	0.049	Intergenic
DOC4_DM	2R_119832_SNP	N	6.17e-09	0.049	Intergenic
DOC4_DM	2R_121505_SNP	N	2.61e-10	0.049	Intergenic
DOC4_DM	2R_121858_DEL	N	1.74e-12	0.049	Intergenic
DOC4_DM	2R_122549_SNP	N	3.77e-10	0.049	FBgn0262117	IntS3	Integrator 3	735	3PRIME	-	snRNA processing ; GO:0016180 | inferred from sequence or structural similarity with HGNC_gene:INTS3; HGNC:26153	Golgi apparatus ; GO:0005794 | inferred from direct assay <newline> integrator complex ; GO:0032039 | inferred from sequence or structural similarity with HGNC_gene:INTS3; HGNC:26153	molecular_function ; GO:0003674 | no biological data available	Hsap\ENSG00000143624
DOC4_DM	2R_123268_SNP	N	1.27e-10	0.049	FBgn0262117	IntS3	Integrator 3	16	3PRIME	-	snRNA processing ; GO:0016180 | inferred from sequence or structural similarity with HGNC_gene:INTS3; HGNC:26153	Golgi apparatus ; GO:0005794 | inferred from direct assay <newline> integrator complex ; GO:0032039 | inferred from sequence or structural similarity with HGNC_gene:INTS3; HGNC:26153	molecular_function ; GO:0003674 | no biological data available	Hsap\ENSG00000143624
DOC4_DM	2R_124180_SNP	N	1.02e-07	0.049	FBgn0262117	IntS3	Integrator 3	0	INTRON	-	snRNA processing ; GO:0016180 | inferred from sequence or structural similarity with HGNC_gene:INTS3; HGNC:26153	Golgi apparatus ; GO:0005794 | inferred from direct assay <newline> integrator complex ; GO:0032039 | inferred from sequence or structural similarity with HGNC_gene:INTS3; HGNC:26153	molecular_function ; GO:0003674 | no biological data available	Hsap\ENSG00000143624
DOC4_DM	2R_124230_SNP	N	2.65e-08	0.049	FBgn0262117	IntS3	Integrator 3	0	EXON	-	snRNA processing ; GO:0016180 | inferred from sequence or structural similarity with HGNC_gene:INTS3; HGNC:26153	Golgi apparatus ; GO:0005794 | inferred from direct assay <newline> integrator complex ; GO:0032039 | inferred from sequence or structural similarity with HGNC_gene:INTS3; HGNC:26153	molecular_function ; GO:0003674 | no biological data available	Hsap\ENSG00000143624
DOC4_DM	2R_125275_DEL	N	8.88e-08	0.049	FBgn0262117	IntS3	Integrator 3	0	INTRON	-	snRNA processing ; GO:0016180 | inferred from sequence or structural similarity with HGNC_gene:INTS3; HGNC:26153	Golgi apparatus ; GO:0005794 | inferred from direct assay <newline> integrator complex ; GO:0032039 | inferred from sequence or structural similarity with HGNC_gene:INTS3; HGNC:26153	molecular_function ; GO:0003674 | no biological data available	Hsap\ENSG00000143624
DOC4_DM	2R_125379_SNP	N	2.97e-10	0.049	FBgn0262117	IntS3	Integrator 3	0	INTRON	-	snRNA processing ; GO:0016180 | inferred from sequence or structural similarity with HGNC_gene:INTS3; HGNC:26153	Golgi apparatus ; GO:0005794 | inferred from direct assay <newline> integrator complex ; GO:0032039 | inferred from sequence or structural similarity with HGNC_gene:INTS3; HGNC:26153	molecular_function ; GO:0003674 | no biological data available	Hsap\ENSG00000143624
DOC4_DM	2R_130941_SNP	N	4.63e-10	0.049	FBgn0262117	IntS3	Integrator 3	502	5PRIME	-	snRNA processing ; GO:0016180 | inferred from sequence or structural similarity with HGNC_gene:INTS3; HGNC:26153	Golgi apparatus ; GO:0005794 | inferred from direct assay <newline> integrator complex ; GO:0032039 | inferred from sequence or structural similarity with HGNC_gene:INTS3; HGNC:26153	molecular_function ; GO:0003674 | no biological data available	Hsap\ENSG00000143624
DOC4_DM	2R_131732_SNP	N	2.6e-10	0.049	Intergenic
DOC4_DM	2R_131854_DEL	N	1.57e-08	0.049	Intergenic
DOC4_DM	2R_132089_INS	N	1.7e-06	0.049	Intergenic
DOC4_DM	2R_132092_SNP	N	7.8e-07	0.049	Intergenic
DOC4_DM	2R_132998_SNP	N	1.36e-08	0.049	Intergenic
DOC4_DM	2R_135354_SNP	N	5.9e-08	0.049	Intergenic
DOC4_DM	2R_135354_SNP	N	5.9e-08	0.049	Intergenic
DOC4_DM	2R_139500_SNP	N	4.5e-10	0.049	Intergenic
DOC4_DM	2R_140251_SNP	N	5.58e-11	0.049	Intergenic
DOC4_DM	2R_140258_SNP	N	1.26e-10	0.049	Intergenic
DOC4_DM	2R_147935_SNP	N	1.22e-10	0.049	Intergenic
DOC4_DM	2R_147935_SNP	N	1.22e-10	0.049	XLOC_006289			921	5PRIME	+
DOC4_DM	2R_148497_SNP	N	4.34e-09	0.049	Intergenic
DOC4_DM	2R_148497_SNP	N	4.34e-09	0.049	XLOC_006289			359	5PRIME	+
DOC4_DM	2R_149041_INS	N	5.42e-14	0.049	Intergenic
DOC4_DM	2R_149041_INS	N	5.42e-14	0.049	XLOC_006289			0	EXON	+
DOC4_DM	2R_149046_SNP	N	3.37e-14	0.049	Intergenic
DOC4_DM	2R_149046_SNP	N	3.37e-14	0.049	XLOC_006289			0	EXON	+
DOC4_DM	2R_157982_SNP	N	1.51e-07	0.049	XLOC_006289			0	INTRON	+
DOC4_DM	2R_167645_DEL	N	1.45e-06	0.049	Intergenic
DOC4_DM	2R_167645_DEL	N	1.45e-06	0.049	Intergenic
DOC4_DM	2R_175487_SNP	N	8.57e-08	0.049	Intergenic
DOC4_DM	2R_181318_SNP	N	2.93e-07	0.049	Intergenic
DOC4_DM	2R_197237_SNP	N	3.11e-06	0.049	Intergenic
DOC4_DM	2R_197237_SNP	N	3.11e-06	0.049	Intergenic
DOC4_DM	2R_197237_SNP	N	3.11e-06	0.049	Intergenic
DOC4_DM	2R_200413_DEL	N	8.52e-10	0.049	Intergenic
DOC4_DM	2R_200413_DEL	N	8.52e-10	0.049	Intergenic
DOC4_DM	2R_200979_INS	N	1.37e-09	0.049	Intergenic
DOC4_DM	2R_209714_INS	N	3.3e-06	0.049	FBgn0260798	Gprk1	G protein-coupled receptor kinase 1	86	3PRIME	-	metarhodopsin inactivation ; GO:0016060 | inferred from mutant phenotype <newline> phototransduction, visible light ; GO:0007603 | inferred from mutant phenotype <newline> protein phosphorylation ; GO:0006468 | inferred from mutant phenotype <newline> protein phosphorylation ; GO:0006468 | inferred from sequence or structural similarity <newline> signal transduction ; GO:0007165 | inferred from s…	-	G-protein coupled receptor binding ; GO:0001664 | inferred from physical interaction with ninaE <newline> ATP binding ; GO:0005524 | inferred from mutant phenotype <newline> rhodopsin kinase activity ; GO:0050254 | inferred from mutant phenotype <newline> phosphatidylinositol binding ; GO:0035091 | inferred from direct assay <newline> G-protein coupled receptor kinase activity ; GO:0004703 | infe…	Hsap\ADRBK1 <newline> Hsap\ADRBK2
DOC4_DM	2R_210696_SNP	N	6.36e-13	0.049	FBgn0260798	Gprk1	G protein-coupled receptor kinase 1	0	INTRON	-	metarhodopsin inactivation ; GO:0016060 | inferred from mutant phenotype <newline> phototransduction, visible light ; GO:0007603 | inferred from mutant phenotype <newline> protein phosphorylation ; GO:0006468 | inferred from mutant phenotype <newline> protein phosphorylation ; GO:0006468 | inferred from sequence or structural similarity <newline> signal transduction ; GO:0007165 | inferred from s…	-	G-protein coupled receptor binding ; GO:0001664 | inferred from physical interaction with ninaE <newline> ATP binding ; GO:0005524 | inferred from mutant phenotype <newline> rhodopsin kinase activity ; GO:0050254 | inferred from mutant phenotype <newline> phosphatidylinositol binding ; GO:0035091 | inferred from direct assay <newline> G-protein coupled receptor kinase activity ; GO:0004703 | infe…	Hsap\ADRBK1 <newline> Hsap\ADRBK2
DOC4_DM	2R_210818_DEL	N	5.8e-12	0.049	FBgn0260798	Gprk1	G protein-coupled receptor kinase 1	0	INTRON	-	metarhodopsin inactivation ; GO:0016060 | inferred from mutant phenotype <newline> phototransduction, visible light ; GO:0007603 | inferred from mutant phenotype <newline> protein phosphorylation ; GO:0006468 | inferred from mutant phenotype <newline> protein phosphorylation ; GO:0006468 | inferred from sequence or structural similarity <newline> signal transduction ; GO:0007165 | inferred from s…	-	G-protein coupled receptor binding ; GO:0001664 | inferred from physical interaction with ninaE <newline> ATP binding ; GO:0005524 | inferred from mutant phenotype <newline> rhodopsin kinase activity ; GO:0050254 | inferred from mutant phenotype <newline> phosphatidylinositol binding ; GO:0035091 | inferred from direct assay <newline> G-protein coupled receptor kinase activity ; GO:0004703 | infe…	Hsap\ADRBK1 <newline> Hsap\ADRBK2
DOC4_DM	2R_217112_DEL	N	8.77e-13	0.049	FBgn0260798	Gprk1	G protein-coupled receptor kinase 1	0	INTRON	-	metarhodopsin inactivation ; GO:0016060 | inferred from mutant phenotype <newline> phototransduction, visible light ; GO:0007603 | inferred from mutant phenotype <newline> protein phosphorylation ; GO:0006468 | inferred from mutant phenotype <newline> protein phosphorylation ; GO:0006468 | inferred from sequence or structural similarity <newline> signal transduction ; GO:0007165 | inferred from s…	-	G-protein coupled receptor binding ; GO:0001664 | inferred from physical interaction with ninaE <newline> ATP binding ; GO:0005524 | inferred from mutant phenotype <newline> rhodopsin kinase activity ; GO:0050254 | inferred from mutant phenotype <newline> phosphatidylinositol binding ; GO:0035091 | inferred from direct assay <newline> G-protein coupled receptor kinase activity ; GO:0004703 | infe…	Hsap\ADRBK1 <newline> Hsap\ADRBK2
DOC4_DM	2R_223150_SNP	N	5.68e-15	0.049	FBgn0260798	Gprk1	G protein-coupled receptor kinase 1	0	INTRON	-	metarhodopsin inactivation ; GO:0016060 | inferred from mutant phenotype <newline> phototransduction, visible light ; GO:0007603 | inferred from mutant phenotype <newline> protein phosphorylation ; GO:0006468 | inferred from mutant phenotype <newline> protein phosphorylation ; GO:0006468 | inferred from sequence or structural similarity <newline> signal transduction ; GO:0007165 | inferred from s…	-	G-protein coupled receptor binding ; GO:0001664 | inferred from physical interaction with ninaE <newline> ATP binding ; GO:0005524 | inferred from mutant phenotype <newline> rhodopsin kinase activity ; GO:0050254 | inferred from mutant phenotype <newline> phosphatidylinositol binding ; GO:0035091 | inferred from direct assay <newline> G-protein coupled receptor kinase activity ; GO:0004703 | infe…	Hsap\ADRBK1 <newline> Hsap\ADRBK2
DOC4_DM	2R_224096_SNP	N	5.99e-14	0.049	FBgn0260798	Gprk1	G protein-coupled receptor kinase 1	0	INTRON	-	metarhodopsin inactivation ; GO:0016060 | inferred from mutant phenotype <newline> phototransduction, visible light ; GO:0007603 | inferred from mutant phenotype <newline> protein phosphorylation ; GO:0006468 | inferred from mutant phenotype <newline> protein phosphorylation ; GO:0006468 | inferred from sequence or structural similarity <newline> signal transduction ; GO:0007165 | inferred from s…	-	G-protein coupled receptor binding ; GO:0001664 | inferred from physical interaction with ninaE <newline> ATP binding ; GO:0005524 | inferred from mutant phenotype <newline> rhodopsin kinase activity ; GO:0050254 | inferred from mutant phenotype <newline> phosphatidylinositol binding ; GO:0035091 | inferred from direct assay <newline> G-protein coupled receptor kinase activity ; GO:0004703 | infe…	Hsap\ADRBK1 <newline> Hsap\ADRBK2
DOC4_DM	2R_224721_SNP	N	1.03e-07	0.049	FBgn0260798	Gprk1	G protein-coupled receptor kinase 1	0	INTRON	-	metarhodopsin inactivation ; GO:0016060 | inferred from mutant phenotype <newline> phototransduction, visible light ; GO:0007603 | inferred from mutant phenotype <newline> protein phosphorylation ; GO:0006468 | inferred from mutant phenotype <newline> protein phosphorylation ; GO:0006468 | inferred from sequence or structural similarity <newline> signal transduction ; GO:0007165 | inferred from s…	-	G-protein coupled receptor binding ; GO:0001664 | inferred from physical interaction with ninaE <newline> ATP binding ; GO:0005524 | inferred from mutant phenotype <newline> rhodopsin kinase activity ; GO:0050254 | inferred from mutant phenotype <newline> phosphatidylinositol binding ; GO:0035091 | inferred from direct assay <newline> G-protein coupled receptor kinase activity ; GO:0004703 | infe…	Hsap\ADRBK1 <newline> Hsap\ADRBK2
DOC4_DM	2R_224789_SNP	N	1.92e-10	0.049	FBgn0260798	Gprk1	G protein-coupled receptor kinase 1	0	INTRON	-	metarhodopsin inactivation ; GO:0016060 | inferred from mutant phenotype <newline> phototransduction, visible light ; GO:0007603 | inferred from mutant phenotype <newline> protein phosphorylation ; GO:0006468 | inferred from mutant phenotype <newline> protein phosphorylation ; GO:0006468 | inferred from sequence or structural similarity <newline> signal transduction ; GO:0007165 | inferred from s…	-	G-protein coupled receptor binding ; GO:0001664 | inferred from physical interaction with ninaE <newline> ATP binding ; GO:0005524 | inferred from mutant phenotype <newline> rhodopsin kinase activity ; GO:0050254 | inferred from mutant phenotype <newline> phosphatidylinositol binding ; GO:0035091 | inferred from direct assay <newline> G-protein coupled receptor kinase activity ; GO:0004703 | infe…	Hsap\ADRBK1 <newline> Hsap\ADRBK2
DOC4_DM	2R_224814_SNP	N	2.19e-10	0.049	FBgn0260798	Gprk1	G protein-coupled receptor kinase 1	0	INTRON	-	metarhodopsin inactivation ; GO:0016060 | inferred from mutant phenotype <newline> phototransduction, visible light ; GO:0007603 | inferred from mutant phenotype <newline> protein phosphorylation ; GO:0006468 | inferred from mutant phenotype <newline> protein phosphorylation ; GO:0006468 | inferred from sequence or structural similarity <newline> signal transduction ; GO:0007165 | inferred from s…	-	G-protein coupled receptor binding ; GO:0001664 | inferred from physical interaction with ninaE <newline> ATP binding ; GO:0005524 | inferred from mutant phenotype <newline> rhodopsin kinase activity ; GO:0050254 | inferred from mutant phenotype <newline> phosphatidylinositol binding ; GO:0035091 | inferred from direct assay <newline> G-protein coupled receptor kinase activity ; GO:0004703 | infe…	Hsap\ADRBK1 <newline> Hsap\ADRBK2
DOC4_DM	2R_227036_SNP	N	1.52e-07	0.049	FBgn0260798	Gprk1	G protein-coupled receptor kinase 1	0	INTRON	-	metarhodopsin inactivation ; GO:0016060 | inferred from mutant phenotype <newline> phototransduction, visible light ; GO:0007603 | inferred from mutant phenotype <newline> protein phosphorylation ; GO:0006468 | inferred from mutant phenotype <newline> protein phosphorylation ; GO:0006468 | inferred from sequence or structural similarity <newline> signal transduction ; GO:0007165 | inferred from s…	-	G-protein coupled receptor binding ; GO:0001664 | inferred from physical interaction with ninaE <newline> ATP binding ; GO:0005524 | inferred from mutant phenotype <newline> rhodopsin kinase activity ; GO:0050254 | inferred from mutant phenotype <newline> phosphatidylinositol binding ; GO:0035091 | inferred from direct assay <newline> G-protein coupled receptor kinase activity ; GO:0004703 | infe…	Hsap\ADRBK1 <newline> Hsap\ADRBK2
DOC4_DM	2R_227036_SNP	N	1.52e-07	0.049	XLOC_008874			588	3PRIME	-
DOC4_DM	2R_231247_SNP	N	9.96e-08	0.049	FBgn0260798	Gprk1	G protein-coupled receptor kinase 1	0	INTRON	-	metarhodopsin inactivation ; GO:0016060 | inferred from mutant phenotype <newline> phototransduction, visible light ; GO:0007603 | inferred from mutant phenotype <newline> protein phosphorylation ; GO:0006468 | inferred from mutant phenotype <newline> protein phosphorylation ; GO:0006468 | inferred from sequence or structural similarity <newline> signal transduction ; GO:0007165 | inferred from s…	-	G-protein coupled receptor binding ; GO:0001664 | inferred from physical interaction with ninaE <newline> ATP binding ; GO:0005524 | inferred from mutant phenotype <newline> rhodopsin kinase activity ; GO:0050254 | inferred from mutant phenotype <newline> phosphatidylinositol binding ; GO:0035091 | inferred from direct assay <newline> G-protein coupled receptor kinase activity ; GO:0004703 | infe…	Hsap\ADRBK1 <newline> Hsap\ADRBK2
DOC4_DM	2R_231247_SNP	N	9.96e-08	0.049	XLOC_008874			104	5PRIME	-
DOC4_DM	2R_231247_SNP	N	9.96e-08	0.049	XLOC_008875			329	3PRIME	-
DOC4_DM	2R_231793_SNP	N	1.48e-07	0.049	FBgn0260798	Gprk1	G protein-coupled receptor kinase 1	0	INTRON	-	metarhodopsin inactivation ; GO:0016060 | inferred from mutant phenotype <newline> phototransduction, visible light ; GO:0007603 | inferred from mutant phenotype <newline> protein phosphorylation ; GO:0006468 | inferred from mutant phenotype <newline> protein phosphorylation ; GO:0006468 | inferred from sequence or structural similarity <newline> signal transduction ; GO:0007165 | inferred from s…	-	G-protein coupled receptor binding ; GO:0001664 | inferred from physical interaction with ninaE <newline> ATP binding ; GO:0005524 | inferred from mutant phenotype <newline> rhodopsin kinase activity ; GO:0050254 | inferred from mutant phenotype <newline> phosphatidylinositol binding ; GO:0035091 | inferred from direct assay <newline> G-protein coupled receptor kinase activity ; GO:0004703 | infe…	Hsap\ADRBK1 <newline> Hsap\ADRBK2
DOC4_DM	2R_231793_SNP	N	1.48e-07	0.049	XLOC_008874			650	5PRIME	-
DOC4_DM	2R_231793_SNP	N	1.48e-07	0.049	XLOC_008875			0	EXON	-
DOC4_DM	2R_231793_SNP	N	1.48e-07	0.049	XLOC_008876			674	3PRIME	-
DOC4_DM	2R_232651_INS	N	1.27e-07	0.049	FBgn0260798	Gprk1	G protein-coupled receptor kinase 1	0	INTRON	-	metarhodopsin inactivation ; GO:0016060 | inferred from mutant phenotype <newline> phototransduction, visible light ; GO:0007603 | inferred from mutant phenotype <newline> protein phosphorylation ; GO:0006468 | inferred from mutant phenotype <newline> protein phosphorylation ; GO:0006468 | inferred from sequence or structural similarity <newline> signal transduction ; GO:0007165 | inferred from s…	-	G-protein coupled receptor binding ; GO:0001664 | inferred from physical interaction with ninaE <newline> ATP binding ; GO:0005524 | inferred from mutant phenotype <newline> rhodopsin kinase activity ; GO:0050254 | inferred from mutant phenotype <newline> phosphatidylinositol binding ; GO:0035091 | inferred from direct assay <newline> G-protein coupled receptor kinase activity ; GO:0004703 | infe…	Hsap\ADRBK1 <newline> Hsap\ADRBK2
DOC4_DM	2R_232651_INS	N	1.27e-07	0.049	XLOC_008875			287	5PRIME	-
DOC4_DM	2R_232651_INS	N	1.27e-07	0.049	XLOC_008876			0	EXON	-
DOC4_DM	2R_233325_SNP	N	7.85e-13	0.049	FBgn0260798	Gprk1	G protein-coupled receptor kinase 1	0	INTRON	-	metarhodopsin inactivation ; GO:0016060 | inferred from mutant phenotype <newline> phototransduction, visible light ; GO:0007603 | inferred from mutant phenotype <newline> protein phosphorylation ; GO:0006468 | inferred from mutant phenotype <newline> protein phosphorylation ; GO:0006468 | inferred from sequence or structural similarity <newline> signal transduction ; GO:0007165 | inferred from s…	-	G-protein coupled receptor binding ; GO:0001664 | inferred from physical interaction with ninaE <newline> ATP binding ; GO:0005524 | inferred from mutant phenotype <newline> rhodopsin kinase activity ; GO:0050254 | inferred from mutant phenotype <newline> phosphatidylinositol binding ; GO:0035091 | inferred from direct assay <newline> G-protein coupled receptor kinase activity ; GO:0004703 | infe…	Hsap\ADRBK1 <newline> Hsap\ADRBK2
DOC4_DM	2R_233325_SNP	N	7.85e-13	0.049	XLOC_008875			961	5PRIME	-
DOC4_DM	2R_233325_SNP	N	7.85e-13	0.049	XLOC_008876			0	EXON	-
DOC4_DM	2R_233990_SNP	N	7.36e-09	0.049	FBgn0260798	Gprk1	G protein-coupled receptor kinase 1	0	INTRON	-	metarhodopsin inactivation ; GO:0016060 | inferred from mutant phenotype <newline> phototransduction, visible light ; GO:0007603 | inferred from mutant phenotype <newline> protein phosphorylation ; GO:0006468 | inferred from mutant phenotype <newline> protein phosphorylation ; GO:0006468 | inferred from sequence or structural similarity <newline> signal transduction ; GO:0007165 | inferred from s…	-	G-protein coupled receptor binding ; GO:0001664 | inferred from physical interaction with ninaE <newline> ATP binding ; GO:0005524 | inferred from mutant phenotype <newline> rhodopsin kinase activity ; GO:0050254 | inferred from mutant phenotype <newline> phosphatidylinositol binding ; GO:0035091 | inferred from direct assay <newline> G-protein coupled receptor kinase activity ; GO:0004703 | infe…	Hsap\ADRBK1 <newline> Hsap\ADRBK2
DOC4_DM	2R_233990_SNP	N	7.36e-09	0.049	XLOC_008876			598	5PRIME	-
DOC4_DM	2R_235675_SNP	N	6.42e-09	0.049	FBgn0260798	Gprk1	G protein-coupled receptor kinase 1	0	INTRON	-	metarhodopsin inactivation ; GO:0016060 | inferred from mutant phenotype <newline> phototransduction, visible light ; GO:0007603 | inferred from mutant phenotype <newline> protein phosphorylation ; GO:0006468 | inferred from mutant phenotype <newline> protein phosphorylation ; GO:0006468 | inferred from sequence or structural similarity <newline> signal transduction ; GO:0007165 | inferred from s…	-	G-protein coupled receptor binding ; GO:0001664 | inferred from physical interaction with ninaE <newline> ATP binding ; GO:0005524 | inferred from mutant phenotype <newline> rhodopsin kinase activity ; GO:0050254 | inferred from mutant phenotype <newline> phosphatidylinositol binding ; GO:0035091 | inferred from direct assay <newline> G-protein coupled receptor kinase activity ; GO:0004703 | infe…	Hsap\ADRBK1 <newline> Hsap\ADRBK2
DOC4_DM	2R_235675_SNP	N	6.42e-09	0.049	XLOC_008877			0	EXON	-
DOC4_DM	2R_238323_DEL	N	7.95e-10	0.049	FBgn0260798	Gprk1	G protein-coupled receptor kinase 1	0	INTRON	-	metarhodopsin inactivation ; GO:0016060 | inferred from mutant phenotype <newline> phototransduction, visible light ; GO:0007603 | inferred from mutant phenotype <newline> protein phosphorylation ; GO:0006468 | inferred from mutant phenotype <newline> protein phosphorylation ; GO:0006468 | inferred from sequence or structural similarity <newline> signal transduction ; GO:0007165 | inferred from s…	-	G-protein coupled receptor binding ; GO:0001664 | inferred from physical interaction with ninaE <newline> ATP binding ; GO:0005524 | inferred from mutant phenotype <newline> rhodopsin kinase activity ; GO:0050254 | inferred from mutant phenotype <newline> phosphatidylinositol binding ; GO:0035091 | inferred from direct assay <newline> G-protein coupled receptor kinase activity ; GO:0004703 | infe…	Hsap\ADRBK1 <newline> Hsap\ADRBK2
DOC4_DM	2R_238323_DEL	N	7.95e-10	0.049	XLOC_008878			326	5PRIME	-
DOC4_DM	2R_238919_SNP	N	1.22e-12	0.049	FBgn0260798	Gprk1	G protein-coupled receptor kinase 1	0	INTRON	-	metarhodopsin inactivation ; GO:0016060 | inferred from mutant phenotype <newline> phototransduction, visible light ; GO:0007603 | inferred from mutant phenotype <newline> protein phosphorylation ; GO:0006468 | inferred from mutant phenotype <newline> protein phosphorylation ; GO:0006468 | inferred from sequence or structural similarity <newline> signal transduction ; GO:0007165 | inferred from s…	-	G-protein coupled receptor binding ; GO:0001664 | inferred from physical interaction with ninaE <newline> ATP binding ; GO:0005524 | inferred from mutant phenotype <newline> rhodopsin kinase activity ; GO:0050254 | inferred from mutant phenotype <newline> phosphatidylinositol binding ; GO:0035091 | inferred from direct assay <newline> G-protein coupled receptor kinase activity ; GO:0004703 | infe…	Hsap\ADRBK1 <newline> Hsap\ADRBK2
DOC4_DM	2R_238919_SNP	N	1.22e-12	0.049	XLOC_008878			922	5PRIME	-
DOC4_DM	2R_251817_SNP	N	2.82e-08	0.049	FBgn0260798	Gprk1	G protein-coupled receptor kinase 1	0	INTRON	-	metarhodopsin inactivation ; GO:0016060 | inferred from mutant phenotype <newline> phototransduction, visible light ; GO:0007603 | inferred from mutant phenotype <newline> protein phosphorylation ; GO:0006468 | inferred from mutant phenotype <newline> protein phosphorylation ; GO:0006468 | inferred from sequence or structural similarity <newline> signal transduction ; GO:0007165 | inferred from s…	-	G-protein coupled receptor binding ; GO:0001664 | inferred from physical interaction with ninaE <newline> ATP binding ; GO:0005524 | inferred from mutant phenotype <newline> rhodopsin kinase activity ; GO:0050254 | inferred from mutant phenotype <newline> phosphatidylinositol binding ; GO:0035091 | inferred from direct assay <newline> G-protein coupled receptor kinase activity ; GO:0004703 | infe…	Hsap\ADRBK1 <newline> Hsap\ADRBK2
DOC4_DM	2R_251817_SNP	N	2.82e-08	0.049	XLOC_008882			415	5PRIME	-
DOC4_DM	2R_251821_SNP	N	1.37e-07	0.049	FBgn0260798	Gprk1	G protein-coupled receptor kinase 1	0	INTRON	-	metarhodopsin inactivation ; GO:0016060 | inferred from mutant phenotype <newline> phototransduction, visible light ; GO:0007603 | inferred from mutant phenotype <newline> protein phosphorylation ; GO:0006468 | inferred from mutant phenotype <newline> protein phosphorylation ; GO:0006468 | inferred from sequence or structural similarity <newline> signal transduction ; GO:0007165 | inferred from s…	-	G-protein coupled receptor binding ; GO:0001664 | inferred from physical interaction with ninaE <newline> ATP binding ; GO:0005524 | inferred from mutant phenotype <newline> rhodopsin kinase activity ; GO:0050254 | inferred from mutant phenotype <newline> phosphatidylinositol binding ; GO:0035091 | inferred from direct assay <newline> G-protein coupled receptor kinase activity ; GO:0004703 | infe…	Hsap\ADRBK1 <newline> Hsap\ADRBK2
DOC4_DM	2R_251821_SNP	N	1.37e-07	0.049	XLOC_008882			419	5PRIME	-
DOC4_DM	2R_253250_SNP	N	2.99e-13	0.049	FBgn0260798	Gprk1	G protein-coupled receptor kinase 1	0	INTRON	-	metarhodopsin inactivation ; GO:0016060 | inferred from mutant phenotype <newline> phototransduction, visible light ; GO:0007603 | inferred from mutant phenotype <newline> protein phosphorylation ; GO:0006468 | inferred from mutant phenotype <newline> protein phosphorylation ; GO:0006468 | inferred from sequence or structural similarity <newline> signal transduction ; GO:0007165 | inferred from s…	-	G-protein coupled receptor binding ; GO:0001664 | inferred from physical interaction with ninaE <newline> ATP binding ; GO:0005524 | inferred from mutant phenotype <newline> rhodopsin kinase activity ; GO:0050254 | inferred from mutant phenotype <newline> phosphatidylinositol binding ; GO:0035091 | inferred from direct assay <newline> G-protein coupled receptor kinase activity ; GO:0004703 | infe…	Hsap\ADRBK1 <newline> Hsap\ADRBK2
DOC4_DM	2R_253830_INS	N	2.9e-12	0.049	FBgn0260798	Gprk1	G protein-coupled receptor kinase 1	0	INTRON	-	metarhodopsin inactivation ; GO:0016060 | inferred from mutant phenotype <newline> phototransduction, visible light ; GO:0007603 | inferred from mutant phenotype <newline> protein phosphorylation ; GO:0006468 | inferred from mutant phenotype <newline> protein phosphorylation ; GO:0006468 | inferred from sequence or structural similarity <newline> signal transduction ; GO:0007165 | inferred from s…	-	G-protein coupled receptor binding ; GO:0001664 | inferred from physical interaction with ninaE <newline> ATP binding ; GO:0005524 | inferred from mutant phenotype <newline> rhodopsin kinase activity ; GO:0050254 | inferred from mutant phenotype <newline> phosphatidylinositol binding ; GO:0035091 | inferred from direct assay <newline> G-protein coupled receptor kinase activity ; GO:0004703 | infe…	Hsap\ADRBK1 <newline> Hsap\ADRBK2
DOC4_DM	2R_256447_SNP	N	1.6e-13	0.049	FBgn0260798	Gprk1	G protein-coupled receptor kinase 1	0	INTRON	-	metarhodopsin inactivation ; GO:0016060 | inferred from mutant phenotype <newline> phototransduction, visible light ; GO:0007603 | inferred from mutant phenotype <newline> protein phosphorylation ; GO:0006468 | inferred from mutant phenotype <newline> protein phosphorylation ; GO:0006468 | inferred from sequence or structural similarity <newline> signal transduction ; GO:0007165 | inferred from s…	-	G-protein coupled receptor binding ; GO:0001664 | inferred from physical interaction with ninaE <newline> ATP binding ; GO:0005524 | inferred from mutant phenotype <newline> rhodopsin kinase activity ; GO:0050254 | inferred from mutant phenotype <newline> phosphatidylinositol binding ; GO:0035091 | inferred from direct assay <newline> G-protein coupled receptor kinase activity ; GO:0004703 | infe…	Hsap\ADRBK1 <newline> Hsap\ADRBK2
DOC4_DM	2R_262401_SNP	N	6.49e-13	0.049	FBgn0260798	Gprk1	G protein-coupled receptor kinase 1	0	INTRON	-	metarhodopsin inactivation ; GO:0016060 | inferred from mutant phenotype <newline> phototransduction, visible light ; GO:0007603 | inferred from mutant phenotype <newline> protein phosphorylation ; GO:0006468 | inferred from mutant phenotype <newline> protein phosphorylation ; GO:0006468 | inferred from sequence or structural similarity <newline> signal transduction ; GO:0007165 | inferred from s…	-	G-protein coupled receptor binding ; GO:0001664 | inferred from physical interaction with ninaE <newline> ATP binding ; GO:0005524 | inferred from mutant phenotype <newline> rhodopsin kinase activity ; GO:0050254 | inferred from mutant phenotype <newline> phosphatidylinositol binding ; GO:0035091 | inferred from direct assay <newline> G-protein coupled receptor kinase activity ; GO:0004703 | infe…	Hsap\ADRBK1 <newline> Hsap\ADRBK2
DOC4_DM	2R_262401_SNP	N	6.49e-13	0.049	XLOC_008883			0	EXON	-
DOC4_DM	2R_262401_SNP	N	6.49e-13	0.049	XLOC_008884			275	3PRIME	-
DOC4_DM	2R_262409_SNP	N	4.51e-13	0.049	FBgn0260798	Gprk1	G protein-coupled receptor kinase 1	0	INTRON	-	metarhodopsin inactivation ; GO:0016060 | inferred from mutant phenotype <newline> phototransduction, visible light ; GO:0007603 | inferred from mutant phenotype <newline> protein phosphorylation ; GO:0006468 | inferred from mutant phenotype <newline> protein phosphorylation ; GO:0006468 | inferred from sequence or structural similarity <newline> signal transduction ; GO:0007165 | inferred from s…	-	G-protein coupled receptor binding ; GO:0001664 | inferred from physical interaction with ninaE <newline> ATP binding ; GO:0005524 | inferred from mutant phenotype <newline> rhodopsin kinase activity ; GO:0050254 | inferred from mutant phenotype <newline> phosphatidylinositol binding ; GO:0035091 | inferred from direct assay <newline> G-protein coupled receptor kinase activity ; GO:0004703 | infe…	Hsap\ADRBK1 <newline> Hsap\ADRBK2
DOC4_DM	2R_262409_SNP	N	4.51e-13	0.049	XLOC_008883			0	EXON	-
DOC4_DM	2R_262409_SNP	N	4.51e-13	0.049	XLOC_008884			267	3PRIME	-
DOC4_DM	2R_274816_SNP	N	4.04e-13	0.049	FBgn0260798	Gprk1	G protein-coupled receptor kinase 1	0	INTRON	-	metarhodopsin inactivation ; GO:0016060 | inferred from mutant phenotype <newline> phototransduction, visible light ; GO:0007603 | inferred from mutant phenotype <newline> protein phosphorylation ; GO:0006468 | inferred from mutant phenotype <newline> protein phosphorylation ; GO:0006468 | inferred from sequence or structural similarity <newline> signal transduction ; GO:0007165 | inferred from s…	-	G-protein coupled receptor binding ; GO:0001664 | inferred from physical interaction with ninaE <newline> ATP binding ; GO:0005524 | inferred from mutant phenotype <newline> rhodopsin kinase activity ; GO:0050254 | inferred from mutant phenotype <newline> phosphatidylinositol binding ; GO:0035091 | inferred from direct assay <newline> G-protein coupled receptor kinase activity ; GO:0004703 | infe…	Hsap\ADRBK1 <newline> Hsap\ADRBK2
DOC4_DM	2R_275771_SNP	N	5.26e-13	0.049	FBgn0260798	Gprk1	G protein-coupled receptor kinase 1	0	INTRON	-	metarhodopsin inactivation ; GO:0016060 | inferred from mutant phenotype <newline> phototransduction, visible light ; GO:0007603 | inferred from mutant phenotype <newline> protein phosphorylation ; GO:0006468 | inferred from mutant phenotype <newline> protein phosphorylation ; GO:0006468 | inferred from sequence or structural similarity <newline> signal transduction ; GO:0007165 | inferred from s…	-	G-protein coupled receptor binding ; GO:0001664 | inferred from physical interaction with ninaE <newline> ATP binding ; GO:0005524 | inferred from mutant phenotype <newline> rhodopsin kinase activity ; GO:0050254 | inferred from mutant phenotype <newline> phosphatidylinositol binding ; GO:0035091 | inferred from direct assay <newline> G-protein coupled receptor kinase activity ; GO:0004703 | infe…	Hsap\ADRBK1 <newline> Hsap\ADRBK2
DOC4_DM	2R_277574_SNP	N	5.84e-13	0.049	FBgn0260798	Gprk1	G protein-coupled receptor kinase 1	0	INTRON	-	metarhodopsin inactivation ; GO:0016060 | inferred from mutant phenotype <newline> phototransduction, visible light ; GO:0007603 | inferred from mutant phenotype <newline> protein phosphorylation ; GO:0006468 | inferred from mutant phenotype <newline> protein phosphorylation ; GO:0006468 | inferred from sequence or structural similarity <newline> signal transduction ; GO:0007165 | inferred from s…	-	G-protein coupled receptor binding ; GO:0001664 | inferred from physical interaction with ninaE <newline> ATP binding ; GO:0005524 | inferred from mutant phenotype <newline> rhodopsin kinase activity ; GO:0050254 | inferred from mutant phenotype <newline> phosphatidylinositol binding ; GO:0035091 | inferred from direct assay <newline> G-protein coupled receptor kinase activity ; GO:0004703 | infe…	Hsap\ADRBK1 <newline> Hsap\ADRBK2
DOC4_DM	2R_278036_SNP	N	6.31e-12	0.049	FBgn0260798	Gprk1	G protein-coupled receptor kinase 1	0	INTRON	-	metarhodopsin inactivation ; GO:0016060 | inferred from mutant phenotype <newline> phototransduction, visible light ; GO:0007603 | inferred from mutant phenotype <newline> protein phosphorylation ; GO:0006468 | inferred from mutant phenotype <newline> protein phosphorylation ; GO:0006468 | inferred from sequence or structural similarity <newline> signal transduction ; GO:0007165 | inferred from s…	-	G-protein coupled receptor binding ; GO:0001664 | inferred from physical interaction with ninaE <newline> ATP binding ; GO:0005524 | inferred from mutant phenotype <newline> rhodopsin kinase activity ; GO:0050254 | inferred from mutant phenotype <newline> phosphatidylinositol binding ; GO:0035091 | inferred from direct assay <newline> G-protein coupled receptor kinase activity ; GO:0004703 | infe…	Hsap\ADRBK1 <newline> Hsap\ADRBK2
DOC4_DM	2R_278352_DEL	N	2.13e-10	0.049	FBgn0260798	Gprk1	G protein-coupled receptor kinase 1	0	INTRON	-	metarhodopsin inactivation ; GO:0016060 | inferred from mutant phenotype <newline> phototransduction, visible light ; GO:0007603 | inferred from mutant phenotype <newline> protein phosphorylation ; GO:0006468 | inferred from mutant phenotype <newline> protein phosphorylation ; GO:0006468 | inferred from sequence or structural similarity <newline> signal transduction ; GO:0007165 | inferred from s…	-	G-protein coupled receptor binding ; GO:0001664 | inferred from physical interaction with ninaE <newline> ATP binding ; GO:0005524 | inferred from mutant phenotype <newline> rhodopsin kinase activity ; GO:0050254 | inferred from mutant phenotype <newline> phosphatidylinositol binding ; GO:0035091 | inferred from direct assay <newline> G-protein coupled receptor kinase activity ; GO:0004703 | infe…	Hsap\ADRBK1 <newline> Hsap\ADRBK2
DOC4_DM	2R_278489_SNP	N	4.45e-13	0.049	FBgn0260798	Gprk1	G protein-coupled receptor kinase 1	0	INTRON	-	metarhodopsin inactivation ; GO:0016060 | inferred from mutant phenotype <newline> phototransduction, visible light ; GO:0007603 | inferred from mutant phenotype <newline> protein phosphorylation ; GO:0006468 | inferred from mutant phenotype <newline> protein phosphorylation ; GO:0006468 | inferred from sequence or structural similarity <newline> signal transduction ; GO:0007165 | inferred from s…	-	G-protein coupled receptor binding ; GO:0001664 | inferred from physical interaction with ninaE <newline> ATP binding ; GO:0005524 | inferred from mutant phenotype <newline> rhodopsin kinase activity ; GO:0050254 | inferred from mutant phenotype <newline> phosphatidylinositol binding ; GO:0035091 | inferred from direct assay <newline> G-protein coupled receptor kinase activity ; GO:0004703 | infe…	Hsap\ADRBK1 <newline> Hsap\ADRBK2
DOC4_DM	2R_278656_SNP	N	3.37e-12	0.049	FBgn0260798	Gprk1	G protein-coupled receptor kinase 1	0	INTRON	-	metarhodopsin inactivation ; GO:0016060 | inferred from mutant phenotype <newline> phototransduction, visible light ; GO:0007603 | inferred from mutant phenotype <newline> protein phosphorylation ; GO:0006468 | inferred from mutant phenotype <newline> protein phosphorylation ; GO:0006468 | inferred from sequence or structural similarity <newline> signal transduction ; GO:0007165 | inferred from s…	-	G-protein coupled receptor binding ; GO:0001664 | inferred from physical interaction with ninaE <newline> ATP binding ; GO:0005524 | inferred from mutant phenotype <newline> rhodopsin kinase activity ; GO:0050254 | inferred from mutant phenotype <newline> phosphatidylinositol binding ; GO:0035091 | inferred from direct assay <newline> G-protein coupled receptor kinase activity ; GO:0004703 | infe…	Hsap\ADRBK1 <newline> Hsap\ADRBK2
DOC4_DM	2R_279117_SNP	N	1.17e-09	0.049	FBgn0260798	Gprk1	G protein-coupled receptor kinase 1	0	INTRON	-	metarhodopsin inactivation ; GO:0016060 | inferred from mutant phenotype <newline> phototransduction, visible light ; GO:0007603 | inferred from mutant phenotype <newline> protein phosphorylation ; GO:0006468 | inferred from mutant phenotype <newline> protein phosphorylation ; GO:0006468 | inferred from sequence or structural similarity <newline> signal transduction ; GO:0007165 | inferred from s…	-	G-protein coupled receptor binding ; GO:0001664 | inferred from physical interaction with ninaE <newline> ATP binding ; GO:0005524 | inferred from mutant phenotype <newline> rhodopsin kinase activity ; GO:0050254 | inferred from mutant phenotype <newline> phosphatidylinositol binding ; GO:0035091 | inferred from direct assay <newline> G-protein coupled receptor kinase activity ; GO:0004703 | infe…	Hsap\ADRBK1 <newline> Hsap\ADRBK2
DOC4_DM	2R_279118_SNP	N	1.75e-09	0.049	FBgn0260798	Gprk1	G protein-coupled receptor kinase 1	0	INTRON	-	metarhodopsin inactivation ; GO:0016060 | inferred from mutant phenotype <newline> phototransduction, visible light ; GO:0007603 | inferred from mutant phenotype <newline> protein phosphorylation ; GO:0006468 | inferred from mutant phenotype <newline> protein phosphorylation ; GO:0006468 | inferred from sequence or structural similarity <newline> signal transduction ; GO:0007165 | inferred from s…	-	G-protein coupled receptor binding ; GO:0001664 | inferred from physical interaction with ninaE <newline> ATP binding ; GO:0005524 | inferred from mutant phenotype <newline> rhodopsin kinase activity ; GO:0050254 | inferred from mutant phenotype <newline> phosphatidylinositol binding ; GO:0035091 | inferred from direct assay <newline> G-protein coupled receptor kinase activity ; GO:0004703 | infe…	Hsap\ADRBK1 <newline> Hsap\ADRBK2
DOC4_DM	2R_279766_SNP	N	1.54e-11	0.049	FBgn0260798	Gprk1	G protein-coupled receptor kinase 1	0	INTRON	-	metarhodopsin inactivation ; GO:0016060 | inferred from mutant phenotype <newline> phototransduction, visible light ; GO:0007603 | inferred from mutant phenotype <newline> protein phosphorylation ; GO:0006468 | inferred from mutant phenotype <newline> protein phosphorylation ; GO:0006468 | inferred from sequence or structural similarity <newline> signal transduction ; GO:0007165 | inferred from s…	-	G-protein coupled receptor binding ; GO:0001664 | inferred from physical interaction with ninaE <newline> ATP binding ; GO:0005524 | inferred from mutant phenotype <newline> rhodopsin kinase activity ; GO:0050254 | inferred from mutant phenotype <newline> phosphatidylinositol binding ; GO:0035091 | inferred from direct assay <newline> G-protein coupled receptor kinase activity ; GO:0004703 | infe…	Hsap\ADRBK1 <newline> Hsap\ADRBK2
[truncated: 3,257 more rows]

## Sheet: S7B. Male eQTL
TE Sequence	eQTL	Retained in model selection	P-Value	FDR	FLyBase Gene ID	Gene Symbol	Gene Name	Distance From Start (bp)	Site Class	Strand	GO Biological Process	GO Cellular Component	GO Molecular Function	Human Orthologs
[truncated: 10,114 more rows]

## Sheet: S7C. eQTL Summary
Sex	TE Sequence	Number of eQTLs	Number of Genes	Number of NTRs
Females	ACCORD_I	199	31	0
	ACCORD2_I	43	4	7
	BARI_DM	3	3	0
	BATUMI_LTR	83	8	1
	Bica_I	75	39	15
	BS	108	50	17
	Chimpo_I	7	3	0
	Copia1-I_DM	32	19	2
	DMLTR5	2	0	0
	DOC	63	13	0
	DOC4_DM	181	16	27
	DOC6_DM	2	2	0
	FW	5	1	0
	G6_DM	1	1	0
	GYPSY10_I	21	12	0
	GYPSY2_I	66	4	0
	GYPSY2_LTR	56	6	1
	Gypsy2-I_DM	268	38	4
	Gypsy2-LTR_DM	13	6	0
	GYPSY3_I	17	3	0
	GYPSY3_LTR	1	4	0
	INVADER1_I	86	36	20
	INVADER1_LTR	4	4	2
	INVADER3_I	83	11	4
[truncated: 51 more rows]

## Sheet: S7D. eQTL location by TE 
Transposon	Sex	eQTL Chromosome	Chi-Square Statistic	Chi-Square P-Value	eQTL Count Difference (Edge-Middle)	Chromosome eQTL Count	Total eQTL Count
[truncated: 175 more rows]

[truncated: 4 more sheets: S7E. eQTL location by chrom, S7F. Female Multiple Assoc, S7G. Male Multiple Associaitons, S7H. GO Enrichment]
