# Supplementary material for: Gene expression networks in the Drosophila Genetic Reference Panel
Source: HighWire-hosted journal article supplement (doi:10.1101/gr.257592.119), 2020-03-01
Supplement: Supplemental_Table_S8.xlsx.xlsx [file Supplemental_Table_S8.xlsx.xlsx]

## Sheet: Table S8A
eQTL (Chromosome_Position)	Gene P-Value	Gene FDR	Gene FlyBase ID	Gene Chromosome	Gene Position	Gene Start	Gene End	TE P-Value	TE FDR	TE Sequence
2L_1986553_SNP	7.92e-14	0	FBgn0039207	3R	20369636	20361926	20369636	5.84e-08	0.0478	BS
2L_21860997_SNP	1.39e-07	0.0495	FBgn0262620	2L	21657625	21657625	21658249	6.2e-06	0.0286	S2_DM
2L_21860997_SNP	1.43e-07	0.0497	XLOC_006359	2R	667741	667741	674254	6.2e-06	0.0286	S2_DM
2L_21998906_SNP	8.82e-07	0.0314	FBgn0023090	2L	21361216	21361216	21367288	9.52e-06	0.0286	S2_DM
2L_22037569_SNP	1.26e-08	0.0314	FBgn0023090	2L	21361216	21361216	21367288	7.41e-06	0.0286	S2_DM
2L_22175015_SNP	1.13e-08	0.0497	XLOC_006359	2R	667741	667741	674254	1.16e-07	0.0286	S2_DM
2L_22178588_SNP	1.81e-13	0.0496	XLOC_006357	2R	646865	646865	649506	6.91e-06	0.0286	S2_DM
2L_22178588_SNP	4.37e-07	0.0497	XLOC_006359	2R	667741	667741	674254	6.91e-06	0.0286	S2_DM
2L_22191124_SNP	3.97e-06	0.0314	FBgn0023090	2L	21361216	21361216	21367288	1.45e-06	0.0286	S2_DM
2L_22191475_SNP	8.68e-06	0.0314	FBgn0023090	2L	21361216	21361216	21367288	5.96e-07	0.0286	S2_DM
2L_22192823_SNP	5.81e-07	0.0314	FBgn0023090	2L	21361216	21361216	21367288	4.25e-06	0.0286	S2_DM
2L_22195820_SNP	4.48e-06	0.0314	FBgn0023090	2L	21361216	21361216	21367288	1.27e-07	0.0286	S2_DM
2L_22195823_SNP	1.3e-07	0.0314	FBgn0023090	2L	21361216	21361216	21367288	6.97e-08	0.0286	S2_DM
2L_22216685_SNP	7.42e-06	0.0314	FBgn0023090	2L	21361216	21361216	21367288	9.37e-06	0.0286	S2_DM
2L_22255745_SNP	4.33e-06	0.045	XLOC_011651	2RHet	861402	861402	862533	3.42e-07	0.0286	S2_DM
2L_22257349_SNP	1.99e-06	0.045	XLOC_011651	2RHet	861402	861402	862533	2.27e-07	0.0286	S2_DM
2L_22265163_SNP	9.24e-07	0.0314	FBgn0023090	2L	21361216	21361216	21367288	3.39e-08	0.0286	S2_DM
2L_22265163_SNP	8.77e-06	0.045	XLOC_011651	2RHet	861402	861402	862533	3.39e-08	0.0286	S2_DM
2L_22265172_SNP	2.02e-06	0.0314	FBgn0023090	2L	21361216	21361216	21367288	3.34e-08	0.0286	S2_DM
2L_22432434_SNP	3.83e-06	0.0491	FBgn0032997	2R	506535	506535	508338	2.91e-07	0.0286	S2_DM
2L_22439783_SNP	2.34e-07	0.045	FBgn0046706	2RHet	3199376	3199376	3234607	1.18e-07	0.0493	DOC4_DM
2L_22439783_SNP	2.76e-06	0.0482	XLOC_011789	2RHet	3215567	3215567	3217239	1.18e-07	0.0493	DOC4_DM
2L_22443140_SNP	9.1e-08	0.0491	FBgn0032997	2R	506535	506535	508338	8.41e-06	0.0286	S2_DM
2L_22446523_DEL	3.89e-06	0.0491	FBgn0032997	2R	506535	506535	508338	5.29e-06	0.0286	S2_DM
2L_22452878_SNP	6.52e-06	0.0491	FBgn0032997	2R	506535	506535	508338	8.69e-06	0.0286	S2_DM
2L_22467943_SNP	5.33e-06	0.05	FBgn0262887	2L	22961737	22961737	22963456	6.41e-07	0.0286	S2_DM
2L_22528760_SNP	1.48e-08	0.0441	XLOC_011704	2RHet	1921599	1921599	1923490	1.3e-06	0.0286	S2_DM
2L_22528760_SNP	3.55e-07	0.0494	XLOC_011705	2RHet	1924263	1924263	1926950	1.3e-06	0.0286	S2_DM
2L_22530125_SNP	1.54e-06	0.045	XLOC_011651	2RHet	861402	861402	862533	3.16e-09	0.0286	S2_DM
2L_22563715_SNP	3.71e-06	0.0314	FBgn0023090	2L	21361216	21361216	21367288	1.88e-08	0.0286	S2_DM
2L_22563715_SNP	3.27e-06	0.045	XLOC_011651	2RHet	861402	861402	862533	1.88e-08	0.0286	S2_DM
2L_22566734_INS	6.85e-07	0.045	XLOC_011651	2RHet	861402	861402	862533	2.07e-10	0.0286	S2_DM
2L_22566847_SNP	1.9e-07	0.045	XLOC_011651	2RHet	861402	861402	862533	1.31e-06	0.0286	S2_DM
2L_22566847_SNP	1.31e-06	0.0497	XLOC_011663	2RHet	1111250	1111250	1139594	1.31e-06	0.0286	S2_DM
2L_22566847_SNP	1.55e-06	0.0441	XLOC_011704	2RHet	1921599	1921599	1923490	1.31e-06	0.0286	S2_DM
2L_22566847_SNP	2.14e-06	0.0482	XLOC_012081	2RHet	3151739	3149849	3151739	1.31e-06	0.0286	S2_DM
2L_22566852_DEL	5.49e-06	0.045	XLOC_011651	2RHet	861402	861402	862533	1.26e-06	0.0286	S2_DM
2L_22566878_SNP	2.36e-07	0.045	XLOC_011651	2RHet	861402	861402	862533	8.18e-06	0.0286	S2_DM
2L_22566878_SNP	2.84e-06	0.0482	XLOC_012081	2RHet	3151739	3149849	3151739	8.18e-06	0.0286	S2_DM
2L_22577616_INS	6.12e-06	0.0495	XLOC_006268	2R	21910	21910	24748	4.37e-06	0.0286	S2_DM
2L_22577616_INS	6.99e-06	0.045	XLOC_011651	2RHet	861402	861402	862533	4.37e-06	0.0286	S2_DM
2L_22578302_SNP	9.57e-06	0.045	XLOC_011651	2RHet	861402	861402	862533	2.14e-08	0.0286	S2_DM
2L_22578577_SNP	1.92e-06	0.0314	FBgn0023090	2L	21361216	21361216	21367288	1.38e-07	0.0286	S2_DM
2L_22579053_SNP	1.54e-06	0.045	XLOC_011651	2RHet	861402	861402	862533	5.75e-10	0.0286	S2_DM
2L_22579210_SNP	4.23e-09	0.0441	XLOC_011704	2RHet	1921599	1921599	1923490	1.78e-06	0.0286	S2_DM
2L_22579210_SNP	6.38e-07	0.0494	XLOC_011705	2RHet	1924263	1924263	1926950	1.78e-06	0.0286	S2_DM
2L_22579552_SNP	1.54e-07	0.0491	XLOC_006067	2L	22624695	22624070	22624695	1.43e-06	0.0286	S2_DM
2L_22581878_SNP	7.83e-08	0.0441	XLOC_011704	2RHet	1921599	1921599	1923490	5.75e-06	0.0286	S2_DM
2L_22582920_SNP	3.63e-06	0.0495	XLOC_006268	2R	21910	21910	24748	9.53e-06	0.0286	S2_DM
2L_22582920_SNP	4.19e-06	0.045	XLOC_011651	2RHet	861402	861402	862533	9.53e-06	0.0286	S2_DM
2L_22583174_SNP	6.9e-06	0.0495	XLOC_006268	2R	21910	21910	24748	1.33e-06	0.0286	S2_DM
2L_22583174_SNP	3.06e-07	0.045	XLOC_011651	2RHet	861402	861402	862533	1.33e-06	0.0286	S2_DM
2L_22584622_INS	3.8e-07	0.0495	XLOC_006268	2R	21910	21910	24748	8.44e-07	0.0286	S2_DM
2L_22584622_INS	1.44e-07	0.045	XLOC_011651	2RHet	861402	861402	862533	8.44e-07	0.0286	S2_DM
2L_22584823_SNP	5.94e-06	0.045	XLOC_011651	2RHet	861402	861402	862533	2.69e-08	0.0286	S2_DM
2L_22584903_INS	3.95e-06	0.045	XLOC_011651	2RHet	861402	861402	862533	2.08e-08	0.0286	S2_DM
2L_22585826_SNP	6.27e-06	0.045	XLOC_011651	2RHet	861402	861402	862533	1.45e-08	0.0286	S2_DM
2L_22586498_SNP	5.02e-07	0.0495	XLOC_006268	2R	21910	21910	24748	2.72e-06	0.0286	S2_DM
2L_22586498_SNP	3.39e-07	0.045	XLOC_011651	2RHet	861402	861402	862533	2.72e-06	0.0286	S2_DM
2L_22586703_DEL	8.57e-06	0.05	FBgn0262887	2L	22961737	22961737	22963456	1.87e-09	0.0286	S2_DM
2L_22587028_SNP	1.69e-06	0.0495	XLOC_006268	2R	21910	21910	24748	5.75e-07	0.0286	S2_DM
2L_22587028_SNP	4.07e-07	0.045	XLOC_011651	2RHet	861402	861402	862533	5.75e-07	0.0286	S2_DM
2L_22587387_SNP	4.36e-07	0.0495	XLOC_006268	2R	21910	21910	24748	1.55e-06	0.0286	S2_DM
2L_22587387_SNP	1.88e-07	0.045	XLOC_011651	2RHet	861402	861402	862533	1.55e-06	0.0286	S2_DM
2L_22589282_SNP	5.23e-07	0.0495	XLOC_006268	2R	21910	21910	24748	3.43e-06	0.0286	S2_DM
2L_22589282_SNP	2.36e-07	0.045	XLOC_011651	2RHet	861402	861402	862533	3.43e-06	0.0286	S2_DM
2L_22589391_INS	7.43e-06	0.045	XLOC_011651	2RHet	861402	861402	862533	6.99e-09	0.0286	S2_DM
2L_22589773_SNP	1.34e-10	0.0441	XLOC_011704	2RHet	1921599	1921599	1923490	2.73e-06	0.0286	S2_DM
2L_22589773_SNP	9.44e-08	0.0494	XLOC_011705	2RHet	1924263	1924263	1926950	2.73e-06	0.0286	S2_DM
2L_22589773_SNP	1.56e-06	0.0482	XLOC_012081	2RHet	3151739	3149849	3151739	2.73e-06	0.0286	S2_DM
2L_22589802_INS	3.23e-07	0.0495	XLOC_006268	2R	21910	21910	24748	4.59e-06	0.0286	S2_DM
2L_22589802_INS	1.94e-07	0.045	XLOC_011651	2RHet	861402	861402	862533	4.59e-06	0.0286	S2_DM
2L_22590281_SNP	4.96e-06	0.0495	XLOC_006268	2R	21910	21910	24748	4.12e-07	0.0286	S2_DM
2L_22590281_SNP	3.34e-07	0.045	XLOC_011651	2RHet	861402	861402	862533	4.12e-07	0.0286	S2_DM
2L_22590612_SNP	1.01e-06	0.0497	XLOC_011663	2RHet	1111250	1111250	1139594	6.47e-06	0.0286	S2_DM
2L_22590612_SNP	2.22e-07	0.0441	XLOC_011704	2RHet	1921599	1921599	1923490	6.47e-06	0.0286	S2_DM
2L_22590858_SNP	3.41e-06	0.05	FBgn0262887	2L	22961737	22961737	22963456	6.87e-07	0.0286	S2_DM
2L_22591833_SNP	4.61e-07	0.0495	XLOC_006268	2R	21910	21910	24748	5.73e-06	0.0286	S2_DM
2L_22591833_SNP	1.02e-07	0.045	XLOC_011651	2RHet	861402	861402	862533	5.73e-06	0.0286	S2_DM
2L_22591917_SNP	3.06e-06	0.0495	XLOC_006268	2R	21910	21910	24748	2.57e-06	0.0286	S2_DM
2L_22591917_SNP	4.39e-07	0.045	XLOC_011651	2RHet	861402	861402	862533	2.57e-06	0.0286	S2_DM
2L_22592340_SNP	2.6e-07	0.0495	XLOC_006268	2R	21910	21910	24748	5.2e-06	0.0286	S2_DM
2L_22592340_SNP	8.61e-08	0.045	XLOC_011651	2RHet	861402	861402	862533	5.2e-06	0.0286	S2_DM
2L_22595019_INS	1.41e-07	0.0495	XLOC_006268	2R	21910	21910	24748	1.99e-06	0.0286	S2_DM
2L_22595019_INS	8.59e-08	0.045	XLOC_011651	2RHet	861402	861402	862533	1.99e-06	0.0286	S2_DM
2L_22596793_SNP	1.54e-06	0.0441	XLOC_011704	2RHet	1921599	1921599	1923490	7.54e-06	0.0286	S2_DM
2L_22596804_SNP	2.32e-06	0.0441	XLOC_011704	2RHet	1921599	1921599	1923490	7.98e-06	0.0286	S2_DM
2L_22597254_SNP	1.64e-06	0.0441	XLOC_011704	2RHet	1921599	1921599	1923490	3.74e-08	0.0286	S2_DM
2L_22597254_SNP	1.31e-06	0.0482	XLOC_011789	2RHet	3215567	3215567	3217239	3.74e-08	0.0286	S2_DM
2L_22597254_SNP	1.41e-06	0.0482	XLOC_012081	2RHet	3151739	3149849	3151739	3.74e-08	0.0286	S2_DM
2L_22597975_SNP	1.56e-06	0.0482	XLOC_011789	2RHet	3215567	3215567	3217239	6.15e-07	0.0286	S2_DM
2L_22599674_SNP	1.71e-06	0.0495	XLOC_006268	2R	21910	21910	24748	2.06e-06	0.0286	S2_DM
2L_22599970_SNP	6.65e-06	0.0495	XLOC_006268	2R	21910	21910	24748	7.24e-06	0.0286	S2_DM
2L_22599970_SNP	5.14e-06	0.045	XLOC_011651	2RHet	861402	861402	862533	7.24e-06	0.0286	S2_DM
2L_22600311_DEL	9.83e-07	0.0495	XLOC_006268	2R	21910	21910	24748	6.08e-06	0.0286	S2_DM
2L_22600311_DEL	9.82e-06	0.045	XLOC_011651	2RHet	861402	861402	862533	6.08e-06	0.0286	S2_DM
2L_22600421_INS	1.76e-07	0.0495	XLOC_006268	2R	21910	21910	24748	1.08e-06	0.0286	S2_DM
2L_22600421_INS	5.8e-08	0.045	XLOC_011651	2RHet	861402	861402	862533	1.08e-06	0.0286	S2_DM
2L_22601168_SNP	4.58e-07	0.0495	XLOC_006268	2R	21910	21910	24748	3.12e-06	0.0286	S2_DM
2L_22601304_DEL	7.78e-07	0.0495	XLOC_006268	2R	21910	21910	24748	4.67e-06	0.0286	S2_DM
2L_22601641_SNP	1.44e-07	0.0495	XLOC_006268	2R	21910	21910	24748	9.99e-06	0.0286	S2_DM
2L_22601641_SNP	1.06e-06	0.045	XLOC_011651	2RHet	861402	861402	862533	9.99e-06	0.0286	S2_DM
2L_22601710_SNP	1.33e-08	0.0441	XLOC_011704	2RHet	1921599	1921599	1923490	7.94e-06	0.0286	S2_DM
2L_22601710_SNP	2.75e-06	0.0494	XLOC_011705	2RHet	1924263	1924263	1926950	7.94e-06	0.0286	S2_DM
2L_22601710_SNP	4.99e-06	0.0482	XLOC_011789	2RHet	3215567	3215567	3217239	7.94e-06	0.0286	S2_DM
2L_22601710_SNP	8.83e-07	0.0482	XLOC_012081	2RHet	3151739	3149849	3151739	7.94e-06	0.0286	S2_DM
2L_22602122_SNP	2.21e-07	0.0495	XLOC_006268	2R	21910	21910	24748	5.54e-06	0.0286	S2_DM
2L_22602122_SNP	1.18e-07	0.045	XLOC_011651	2RHet	861402	861402	862533	5.54e-06	0.0286	S2_DM
2L_22607640_SNP	8.6e-06	0.045	XLOC_011651	2RHet	861402	861402	862533	3.07e-07	0.0286	S2_DM
2L_22609204_INS	5.81e-06	0.0495	XLOC_006268	2R	21910	21910	24748	3.04e-09	0.0286	S2_DM
2L_22609204_INS	1.4e-06	0.045	XLOC_011651	2RHet	861402	861402	862533	3.04e-09	0.0286	S2_DM
2L_22617975_SNP	1.91e-06	0.05	FBgn0262887	2L	22961737	22961737	22963456	2.33e-06	0.0286	S2_DM
2L_22618474_SNP	2.25e-07	0.0441	XLOC_011704	2RHet	1921599	1921599	1923490	8.11e-06	0.0286	S2_DM
2L_22624112_SNP	9.11e-06	0.0314	FBgn0023090	2L	21361216	21361216	21367288	6.96e-09	0.0286	S2_DM
2L_22624112_SNP	8.71e-06	0.05	FBgn0262887	2L	22961737	22961737	22963456	6.96e-09	0.0286	S2_DM
2L_22625859_DEL	7.62e-06	0.0314	FBgn0023090	2L	21361216	21361216	21367288	1.05e-07	0.0286	S2_DM
2L_22625859_DEL	1.42e-06	0.0465	XLOC_011917	2RHet	973581	973122	973581	1.05e-07	0.0286	S2_DM
2L_22626018_SNP	7.99e-06	0.0314	FBgn0023090	2L	21361216	21361216	21367288	3.1e-07	0.0286	S2_DM
2L_22629463_SNP	8.04e-08	0.0314	FBgn0023090	2L	21361216	21361216	21367288	4.17e-08	0.0286	S2_DM
2L_22634322_SNP	2.07e-12	0.045	FBgn0046706	2RHet	3199376	3199376	3234607	1.28e-07	0.0493	DOC4_DM
2L_22634322_SNP	3.64e-07	0.0499	XLOC_008884	2R	264145	262676	264145	1.28e-07	0.0493	DOC4_DM
2L_22634322_SNP	1.6e-13	0.0441	XLOC_011704	2RHet	1921599	1921599	1923490	1.28e-07	0.0493	DOC4_DM
2L_22634322_SNP	3.48e-09	0.0494	XLOC_011705	2RHet	1924263	1924263	1926950	1.28e-07	0.0493	DOC4_DM
2L_22634322_SNP	2.42e-11	0.0482	XLOC_011789	2RHet	3215567	3215567	3217239	1.28e-07	0.0493	DOC4_DM
2L_22634322_SNP	4.98e-09	0.0499	XLOC_011977	2RHet	1591609	1590552	1591609	1.28e-07	0.0493	DOC4_DM
2L_22634322_SNP	1.07e-10	0.0482	XLOC_012081	2RHet	3151739	3149849	3151739	1.28e-07	0.0493	DOC4_DM
2L_22635064_SNP	8e-06	0.0314	FBgn0023090	2L	21361216	21361216	21367288	2.77e-08	0.0286	S2_DM
2L_22635064_SNP	7.7e-06	0.05	FBgn0262887	2L	22961737	22961737	22963456	2.77e-08	0.0286	S2_DM
2L_22636130_SNP	1.33e-08	0.0441	XLOC_011704	2RHet	1921599	1921599	1923490	7.94e-06	0.0286	S2_DM
2L_22636130_SNP	2.75e-06	0.0494	XLOC_011705	2RHet	1924263	1924263	1926950	7.94e-06	0.0286	S2_DM
2L_22636130_SNP	4.99e-06	0.0482	XLOC_011789	2RHet	3215567	3215567	3217239	7.94e-06	0.0286	S2_DM
2L_22636130_SNP	8.83e-07	0.0482	XLOC_012081	2RHet	3151739	3149849	3151739	7.94e-06	0.0286	S2_DM
2L_22639070_SNP	9e-06	0.0314	FBgn0023090	2L	21361216	21361216	21367288	1.04e-09	0.0286	S2_DM
2L_22640113_DEL	4.75e-07	0.0465	XLOC_011917	2RHet	973581	973122	973581	6.79e-08	0.0286	S2_DM
2L_22640132_DEL	1.34e-06	0.0465	XLOC_011917	2RHet	973581	973122	973581	3.08e-06	0.0286	S2_DM
2L_22640272_SNP	2.24e-06	0.0495	XLOC_006268	2R	21910	21910	24748	7.97e-07	0.0286	S2_DM
2L_22640272_SNP	8.04e-08	0.045	XLOC_011651	2RHet	861402	861402	862533	7.97e-07	0.0286	S2_DM
2L_22640528_SNP	6.36e-06	0.0314	FBgn0023090	2L	21361216	21361216	21367288	3.71e-07	0.0286	S2_DM
2L_22640605_SNP	1.89e-06	0.0314	FBgn0023090	2L	21361216	21361216	21367288	4.58e-08	0.0286	S2_DM
2L_22645682_SNP	1.73e-06	0.05	FBgn0262887	2L	22961737	22961737	22963456	7e-08	0.0286	S2_DM
2L_22645682_SNP	3.09e-07	0.045	XLOC_011651	2RHet	861402	861402	862533	7e-08	0.0286	S2_DM
2L_22646669_SNP	5.69e-07	0.05	FBgn0262887	2L	22961737	22961737	22963456	2.9e-09	0.0286	S2_DM
2L_22650455_SNP	1.47e-06	0.0314	FBgn0023090	2L	21361216	21361216	21367288	1.87e-09	0.0286	S2_DM
2L_22656571_SNP	1.66e-06	0.045	XLOC_011651	2RHet	861402	861402	862533	4.63e-09	0.0286	S2_DM
2L_22656594_SNP	8.57e-06	0.0314	FBgn0023090	2L	21361216	21361216	21367288	8.85e-10	0.0286	S2_DM
2L_22656594_SNP	6.59e-06	0.045	XLOC_011651	2RHet	861402	861402	862533	8.85e-10	0.0286	S2_DM
2L_22656613_SNP	2.81e-06	0.045	XLOC_011651	2RHet	861402	861402	862533	1.63e-09	0.0286	S2_DM
2L_22656746_SNP	8.62e-06	0.05	FBgn0262887	2L	22961737	22961737	22963456	5.2e-11	0.0286	S2_DM
2L_22656746_SNP	3.93e-06	0.045	XLOC_011651	2RHet	861402	861402	862533	5.2e-11	0.0286	S2_DM
2L_22656858_SNP	7.69e-06	0.045	XLOC_011651	2RHet	861402	861402	862533	1.07e-09	0.0286	S2_DM
2L_22656967_SNP	3.33e-07	0.045	XLOC_011651	2RHet	861402	861402	862533	6.79e-09	0.0286	S2_DM
2L_22657065_SNP	6.14e-06	0.0314	FBgn0023090	2L	21361216	21361216	21367288	2.9e-09	0.0286	S2_DM
2L_22657065_SNP	2.42e-06	0.045	XLOC_011651	2RHet	861402	861402	862533	2.9e-09	0.0286	S2_DM
2L_22657080_INS	7.33e-06	0.045	XLOC_011651	2RHet	861402	861402	862533	5.17e-11	0.0286	S2_DM
2L_22657292_SNP	1.7e-07	0.0314	FBgn0023090	2L	21361216	21361216	21367288	6.55e-10	0.0286	S2_DM
2L_22657292_SNP	7.76e-06	0.045	XLOC_011651	2RHet	861402	861402	862533	6.55e-10	0.0286	S2_DM
2L_22657485_SNP	9.12e-07	0.0495	XLOC_006268	2R	21910	21910	24748	2.36e-07	0.0286	S2_DM
2L_22657485_SNP	2.11e-06	0.045	XLOC_011651	2RHet	861402	861402	862533	2.36e-07	0.0286	S2_DM
2L_22657672_SNP	9.4e-06	0.0314	FBgn0023090	2L	21361216	21361216	21367288	1.07e-10	0.0286	S2_DM
2L_22657672_SNP	1.53e-06	0.045	XLOC_011651	2RHet	861402	861402	862533	1.07e-10	0.0286	S2_DM
2L_22657749_SNP	5.65e-06	0.0314	FBgn0023090	2L	21361216	21361216	21367288	1.36e-10	0.0286	S2_DM
2L_22657749_SNP	8.19e-06	0.05	FBgn0262887	2L	22961737	22961737	22963456	1.36e-10	0.0286	S2_DM
2L_22657749_SNP	6.51e-06	0.045	XLOC_011651	2RHet	861402	861402	862533	1.36e-10	0.0286	S2_DM
2L_22657842_SNP	6.11e-07	0.0314	FBgn0023090	2L	21361216	21361216	21367288	8.01e-11	0.0286	S2_DM
2L_22657842_SNP	7.51e-06	0.05	FBgn0262887	2L	22961737	22961737	22963456	8.01e-11	0.0286	S2_DM
2L_22657842_SNP	4.58e-06	0.045	XLOC_011651	2RHet	861402	861402	862533	8.01e-11	0.0286	S2_DM
2L_22666840_SNP	7.35e-06	0.045	XLOC_011651	2RHet	861402	861402	862533	2.55e-11	0.0286	S2_DM
2L_22667515_SNP	5.63e-07	0.0314	FBgn0023090	2L	21361216	21361216	21367288	1.77e-10	0.0286	S2_DM
2L_22667515_SNP	2.7e-06	0.045	XLOC_011651	2RHet	861402	861402	862533	1.77e-10	0.0286	S2_DM
2L_22667645_DEL	9.28e-06	0.0314	FBgn0023090	2L	21361216	21361216	21367288	1.48e-10	0.0286	S2_DM
2L_22668097_SNP	4.69e-06	0.0314	FBgn0023090	2L	21361216	21361216	21367288	2.21e-10	0.0286	S2_DM
2L_22668929_SNP	3.65e-06	0.045	XLOC_011651	2RHet	861402	861402	862533	8.82e-10	0.0286	S2_DM
2L_22669091_SNP	9.97e-08	0.0314	FBgn0023090	2L	21361216	21361216	21367288	2.91e-09	0.0286	S2_DM
2L_22669091_SNP	3.45e-06	0.045	XLOC_011651	2RHet	861402	861402	862533	2.91e-09	0.0286	S2_DM
2L_22671091_SNP	1.33e-06	0.0314	FBgn0023090	2L	21361216	21361216	21367288	1.99e-09	0.0286	S2_DM
2L_22671091_SNP	3.44e-06	0.045	XLOC_011651	2RHet	861402	861402	862533	1.99e-09	0.0286	S2_DM
2L_22671237_SNP	6.94e-06	0.0314	FBgn0023090	2L	21361216	21361216	21367288	2.58e-09	0.0286	S2_DM
2L_22671237_SNP	3.61e-06	0.045	XLOC_011651	2RHet	861402	861402	862533	2.58e-09	0.0286	S2_DM
2L_22671263_SNP	2.05e-07	0.0314	FBgn0023090	2L	21361216	21361216	21367288	4.04e-10	0.0286	S2_DM
2L_22671263_SNP	9.01e-06	0.045	XLOC_011651	2RHet	861402	861402	862533	4.04e-10	0.0286	S2_DM
2L_22671418_SNP	6.93e-06	0.0314	FBgn0023090	2L	21361216	21361216	21367288	9.54e-11	0.0286	S2_DM
2L_22671418_SNP	4.53e-06	0.045	XLOC_011651	2RHet	861402	861402	862533	9.54e-11	0.0286	S2_DM
2L_22671483_SNP	2.14e-06	0.0314	FBgn0023090	2L	21361216	21361216	21367288	6.57e-11	0.0286	S2_DM
2L_22671483_SNP	3.17e-06	0.05	FBgn0262887	2L	22961737	22961737	22963456	6.57e-11	0.0286	S2_DM
2L_22671531_SNP	3.82e-06	0.0314	FBgn0023090	2L	21361216	21361216	21367288	1.44e-10	0.0286	S2_DM
2L_22671531_SNP	9.03e-07	0.045	XLOC_011651	2RHet	861402	861402	862533	1.44e-10	0.0286	S2_DM
2L_22671796_SNP	2.18e-06	0.0314	FBgn0023090	2L	21361216	21361216	21367288	2.07e-09	0.0286	S2_DM
2L_22671796_SNP	4.77e-06	0.045	XLOC_011651	2RHet	861402	861402	862533	2.07e-09	0.0286	S2_DM
2L_22671961_SNP	5.71e-06	0.045	XLOC_011651	2RHet	861402	861402	862533	1.27e-09	0.0286	S2_DM
2L_22672173_SNP	5.47e-06	0.0314	FBgn0023090	2L	21361216	21361216	21367288	3.65e-09	0.0286	S2_DM
2L_22672173_SNP	6.45e-06	0.0495	XLOC_006268	2R	21910	21910	24748	3.65e-09	0.0286	S2_DM
2L_22672173_SNP	4.35e-06	0.045	XLOC_011651	2RHet	861402	861402	862533	3.65e-09	0.0286	S2_DM
2L_22672220_SNP	5.45e-07	0.045	XLOC_011651	2RHet	861402	861402	862533	2.61e-08	0.0286	S2_DM
2L_22672361_SNP	7.43e-07	0.0314	FBgn0023090	2L	21361216	21361216	21367288	1.04e-08	0.0286	S2_DM
2L_22672361_SNP	6.1e-06	0.0495	XLOC_006268	2R	21910	21910	24748	1.04e-08	0.0286	S2_DM
2L_22672361_SNP	2.32e-07	0.045	XLOC_011651	2RHet	861402	861402	862533	1.04e-08	0.0286	S2_DM
2L_22672712_SNP	3.15e-07	0.0314	FBgn0023090	2L	21361216	21361216	21367288	9.02e-08	0.0286	S2_DM
2L_22672712_SNP	6.4e-07	0.05	FBgn0262887	2L	22961737	22961737	22963456	9.02e-08	0.0286	S2_DM
2L_22672712_SNP	4.07e-06	0.045	XLOC_011651	2RHet	861402	861402	862533	9.02e-08	0.0286	S2_DM
2L_22673668_SNP	6.28e-06	0.045	XLOC_011651	2RHet	861402	861402	862533	1.24e-06	0.0286	S2_DM
2L_22680865_SNP	1.99e-08	0.045	XLOC_011651	2RHet	861402	861402	862533	9.66e-07	0.0286	S2_DM
2L_22680934_DEL	6.55e-08	0.045	XLOC_011651	2RHet	861402	861402	862533	2.93e-12	0.0286	S2_DM
2L_22680967_DEL	1.5e-06	0.0314	FBgn0023090	2L	21361216	21361216	21367288	3.7e-11	0.0286	S2_DM
2L_22680967_DEL	2.01e-06	0.05	FBgn0262887	2L	22961737	22961737	22963456	3.7e-11	0.0286	S2_DM
2L_22680967_DEL	4.96e-09	0.045	XLOC_011651	2RHet	861402	861402	862533	3.7e-11	0.0286	S2_DM
2L_22680974_SNP	5.96e-07	0.0314	FBgn0023090	2L	21361216	21361216	21367288	5.59e-11	0.0286	S2_DM
2L_22680974_SNP	6.98e-06	0.05	FBgn0262887	2L	22961737	22961737	22963456	5.59e-11	0.0286	S2_DM
2L_22680974_SNP	9.25e-10	0.045	XLOC_011651	2RHet	861402	861402	862533	5.59e-11	0.0286	S2_DM
2L_22680976_SNP	3.46e-06	0.0314	FBgn0023090	2L	21361216	21361216	21367288	7.78e-11	0.0286	S2_DM
2L_22680976_SNP	2.46e-09	0.045	XLOC_011651	2RHet	861402	861402	862533	7.78e-11	0.0286	S2_DM
2L_22680990_SNP	3.28e-06	0.0314	FBgn0023090	2L	21361216	21361216	21367288	3.57e-11	0.0286	S2_DM
2L_22680990_SNP	7.18e-06	0.05	FBgn0262887	2L	22961737	22961737	22963456	3.57e-11	0.0286	S2_DM
2L_22680990_SNP	5.18e-09	0.045	XLOC_011651	2RHet	861402	861402	862533	3.57e-11	0.0286	S2_DM
2L_22681005_SNP	2.88e-08	0.045	XLOC_011651	2RHet	861402	861402	862533	2.82e-06	0.0286	S2_DM
2L_22681025_SNP	4.44e-07	0.0492	FBgn0085732	2RHet	337700	337700	340299	9.38e-07	0.0286	S2_DM
2L_22681025_SNP	2.29e-09	0.045	XLOC_011651	2RHet	861402	861402	862533	9.38e-07	0.0286	S2_DM
2L_22681324_DEL	9.84e-06	0.0314	FBgn0023090	2L	21361216	21361216	21367288	4.09e-11	0.0286	S2_DM
2L_22681324_DEL	3.16e-07	0.045	XLOC_011651	2RHet	861402	861402	862533	4.09e-11	0.0286	S2_DM
2L_22682100_SNP	4.18e-06	0.0314	FBgn0023090	2L	21361216	21361216	21367288	1.46e-07	0.0286	S2_DM
2L_22682100_SNP	2.63e-08	0.045	XLOC_011651	2RHet	861402	861402	862533	1.46e-07	0.0286	S2_DM
2L_22682244_SNP	4.09e-07	0.0314	FBgn0023090	2L	21361216	21361216	21367288	1.45e-12	0.0286	S2_DM
2L_22682244_SNP	1.99e-06	0.05	FBgn0262887	2L	22961737	22961737	22963456	1.45e-12	0.0286	S2_DM
2L_22682244_SNP	2.75e-09	0.045	XLOC_011651	2RHet	861402	861402	862533	1.45e-12	0.0286	S2_DM
2L_22682245_SNP	7.45e-07	0.0314	FBgn0023090	2L	21361216	21361216	21367288	6.58e-12	0.0286	S2_DM
2L_22682245_SNP	7.92e-07	0.05	FBgn0262887	2L	22961737	22961737	22963456	6.58e-12	0.0286	S2_DM
2L_22682245_SNP	2.91e-09	0.045	XLOC_011651	2RHet	861402	861402	862533	6.58e-12	0.0286	S2_DM
2L_22682324_SNP	2.46e-06	0.0314	FBgn0023090	2L	21361216	21361216	21367288	5.67e-11	0.0286	S2_DM
2L_22682324_SNP	3.47e-06	0.05	FBgn0262887	2L	22961737	22961737	22963456	5.67e-11	0.0286	S2_DM
2L_22682324_SNP	7.62e-06	0.0495	XLOC_006268	2R	21910	21910	24748	5.67e-11	0.0286	S2_DM
2L_22682324_SNP	3.55e-09	0.045	XLOC_011651	2RHet	861402	861402	862533	5.67e-11	0.0286	S2_DM
2L_22682684_SNP	4.4e-06	0.0314	FBgn0023090	2L	21361216	21361216	21367288	2.62e-07	0.0286	S2_DM
2L_22682684_SNP	1.4e-07	0.045	XLOC_011651	2RHet	861402	861402	862533	2.62e-07	0.0286	S2_DM
2L_22682743_SNP	2.74e-06	0.0314	FBgn0023090	2L	21361216	21361216	21367288	3.79e-11	0.0286	S2_DM
2L_22682743_SNP	3.65e-06	0.05	FBgn0262887	2L	22961737	22961737	22963456	3.79e-11	0.0286	S2_DM
2L_22682743_SNP	1.1e-08	0.045	XLOC_011651	2RHet	861402	861402	862533	3.79e-11	0.0286	S2_DM
2L_22682744_SNP	8.46e-07	0.0314	FBgn0023090	2L	21361216	21361216	21367288	1.9e-11	0.0286	S2_DM
2L_22682744_SNP	1.59e-06	0.05	FBgn0262887	2L	22961737	22961737	22963456	1.9e-11	0.0286	S2_DM
2L_22682744_SNP	7.08e-06	0.0495	XLOC_006268	2R	21910	21910	24748	1.9e-11	0.0286	S2_DM
2L_22682744_SNP	2.98e-09	0.045	XLOC_011651	2RHet	861402	861402	862533	1.9e-11	0.0286	S2_DM
2L_22682955_SNP	3.53e-06	0.0314	FBgn0023090	2L	21361216	21361216	21367288	5.54e-11	0.0286	S2_DM
2L_22682955_SNP	4.36e-06	0.05	FBgn0262887	2L	22961737	22961737	22963456	5.54e-11	0.0286	S2_DM
2L_22682955_SNP	6.26e-06	0.0495	XLOC_006268	2R	21910	21910	24748	5.54e-11	0.0286	S2_DM
2L_22682955_SNP	2.66e-08	0.045	XLOC_011651	2RHet	861402	861402	862533	5.54e-11	0.0286	S2_DM
2L_22683056_SNP	2.56e-06	0.0314	FBgn0023090	2L	21361216	21361216	21367288	1.58e-07	0.0286	S2_DM
2L_22683056_SNP	1.12e-08	0.045	XLOC_011651	2RHet	861402	861402	862533	1.58e-07	0.0286	S2_DM
2L_22683669_SNP	3.94e-07	0.0314	FBgn0023090	2L	21361216	21361216	21367288	1.69e-11	0.0286	S2_DM
2L_22683669_SNP	1.46e-09	0.045	XLOC_011651	2RHet	861402	861402	862533	1.69e-11	0.0286	S2_DM
2L_22683972_SNP	3.57e-07	0.0314	FBgn0023090	2L	21361216	21361216	21367288	2.35e-12	0.0286	S2_DM
2L_22683972_SNP	1.41e-06	0.05	FBgn0262887	2L	22961737	22961737	22963456	2.35e-12	0.0286	S2_DM
2L_22683972_SNP	9.19e-06	0.0495	XLOC_006268	2R	21910	21910	24748	2.35e-12	0.0286	S2_DM
2L_22683972_SNP	1.38e-08	0.045	XLOC_011651	2RHet	861402	861402	862533	2.35e-12	0.0286	S2_DM
2L_22684518_SNP	4.32e-07	0.0314	FBgn0023090	2L	21361216	21361216	21367288	3.68e-11	0.0286	S2_DM
2L_22684518_SNP	1.91e-06	0.05	FBgn0262887	2L	22961737	22961737	22963456	3.68e-11	0.0286	S2_DM
2L_22684518_SNP	5e-06	0.0495	XLOC_006268	2R	21910	21910	24748	3.68e-11	0.0286	S2_DM
2L_22684518_SNP	6.09e-09	0.045	XLOC_011651	2RHet	861402	861402	862533	3.68e-11	0.0286	S2_DM
2L_22684629_SNP	5e-07	0.0314	FBgn0023090	2L	21361216	21361216	21367288	6.14e-12	0.0286	S2_DM
2L_22684629_SNP	1.83e-06	0.05	FBgn0262887	2L	22961737	22961737	22963456	6.14e-12	0.0286	S2_DM
2L_22684629_SNP	4.08e-06	0.0495	XLOC_006268	2R	21910	21910	24748	6.14e-12	0.0286	S2_DM
2L_22684629_SNP	5.98e-09	0.045	XLOC_011651	2RHet	861402	861402	862533	6.14e-12	0.0286	S2_DM
2L_22684877_SNP	9.91e-08	0.0314	FBgn0023090	2L	21361216	21361216	21367288	4.24e-11	0.0286	S2_DM
2L_22684877_SNP	6.94e-06	0.0495	XLOC_006268	2R	21910	21910	24748	4.24e-11	0.0286	S2_DM
2L_22684877_SNP	5.34e-08	0.045	XLOC_011651	2RHet	861402	861402	862533	4.24e-11	0.0286	S2_DM
2L_22684933_SNP	2.76e-08	0.045	XLOC_011651	2RHet	861402	861402	862533	6.58e-07	0.0286	S2_DM
2L_22684934_SNP	5.82e-06	0.0314	FBgn0023090	2L	21361216	21361216	21367288	1.97e-07	0.0286	S2_DM
2L_22684934_SNP	1.54e-08	0.045	XLOC_011651	2RHet	861402	861402	862533	1.97e-07	0.0286	S2_DM
2L_22685066_SNP	1.37e-06	0.0314	FBgn0023090	2L	21361216	21361216	21367288	1.83e-11	0.0286	S2_DM
2L_22685066_SNP	9.7e-07	0.05	FBgn0262887	2L	22961737	22961737	22963456	1.83e-11	0.0286	S2_DM
2L_22685066_SNP	9.09e-06	0.0495	XLOC_006268	2R	21910	21910	24748	1.83e-11	0.0286	S2_DM
2L_22685066_SNP	6.25e-09	0.045	XLOC_011651	2RHet	861402	861402	862533	1.83e-11	0.0286	S2_DM
2L_22685067_SNP	1.33e-06	0.0314	FBgn0023090	2L	21361216	21361216	21367288	2.02e-11	0.0286	S2_DM
2L_22685067_SNP	1.66e-06	0.05	FBgn0262887	2L	22961737	22961737	22963456	2.02e-11	0.0286	S2_DM
2L_22685067_SNP	7.93e-06	0.0495	XLOC_006268	2R	21910	21910	24748	2.02e-11	0.0286	S2_DM
2L_22685067_SNP	1.77e-08	0.045	XLOC_011651	2RHet	861402	861402	862533	2.02e-11	0.0286	S2_DM
2L_22685098_SNP	5.78e-06	0.0314	FBgn0023090	2L	21361216	21361216	21367288	1.97e-07	0.0286	S2_DM
2L_22685098_SNP	3.42e-08	0.045	XLOC_011651	2RHet	861402	861402	862533	1.97e-07	0.0286	S2_DM
2L_22685732_SNP	7.54e-07	0.0492	FBgn0085732	2RHet	337700	337700	340299	7.55e-06	0.0286	S2_DM
2L_22685732_SNP	5.67e-11	0.045	XLOC_011651	2RHet	861402	861402	862533	7.55e-06	0.0286	S2_DM
2L_22685732_SNP	6.93e-09	0.0471	XLOC_011955	2RHet	1320736	1319788	1320736	7.55e-06	0.0286	S2_DM
2L_22685775_SNP	1.3e-10	0.045	XLOC_011651	2RHet	861402	861402	862533	5.02e-06	0.0286	S2_DM
2L_22685775_SNP	4.87e-06	0.0486	XLOC_011942	2RHet	1262608	1258487	1262608	5.02e-06	0.0286	S2_DM
2L_22685775_SNP	7.57e-09	0.0471	XLOC_011955	2RHet	1320736	1319788	1320736	5.02e-06	0.0286	S2_DM
2L_22685791_SNP	8.92e-11	0.045	XLOC_011651	2RHet	861402	861402	862533	6.39e-06	0.0286	S2_DM
2L_22685791_SNP	6.11e-09	0.0471	XLOC_011955	2RHet	1320736	1319788	1320736	6.39e-06	0.0286	S2_DM
2L_22685900_SNP	3.39e-06	0.0314	FBgn0023090	2L	21361216	21361216	21367288	9.21e-12	0.0286	S2_DM
2L_22685900_SNP	5e-06	0.05	FBgn0262887	2L	22961737	22961737	22963456	9.21e-12	0.0286	S2_DM
2L_22685900_SNP	5.73e-06	0.0495	XLOC_006268	2R	21910	21910	24748	9.21e-12	0.0286	S2_DM
2L_22685900_SNP	6.45e-09	0.045	XLOC_011651	2RHet	861402	861402	862533	9.21e-12	0.0286	S2_DM
2L_22686253_SNP	4.28e-06	0.0314	FBgn0023090	2L	21361216	21361216	21367288	1.09e-06	0.0286	S2_DM
2L_22686253_SNP	4.31e-08	0.045	XLOC_011651	2RHet	861402	861402	862533	1.09e-06	0.0286	S2_DM
2L_22686281_SNP	4.82e-07	0.0314	FBgn0023090	2L	21361216	21361216	21367288	1.56e-09	0.0286	S2_DM
2L_22686281_SNP	1.04e-07	0.0495	XLOC_006268	2R	21910	21910	24748	1.56e-09	0.0286	S2_DM
2L_22686281_SNP	6.88e-10	0.045	XLOC_011651	2RHet	861402	861402	862533	1.56e-09	0.0286	S2_DM
2L_22686423_SNP	1.17e-06	0.0314	FBgn0023090	2L	21361216	21361216	21367288	9.93e-11	0.0286	S2_DM
2L_22686423_SNP	4.21e-06	0.05	FBgn0262887	2L	22961737	22961737	22963456	9.93e-11	0.0286	S2_DM
2L_22686423_SNP	9.78e-07	0.0495	XLOC_006268	2R	21910	21910	24748	9.93e-11	0.0286	S2_DM
2L_22686423_SNP	6.32e-09	0.045	XLOC_011651	2RHet	861402	861402	862533	9.93e-11	0.0286	S2_DM
2L_22686456_SNP	7.81e-06	0.045	XLOC_011651	2RHet	861402	861402	862533	1.24e-10	0.0286	S2_DM
2L_22686456_SNP	1.62e-06	0.0482	XLOC_011789	2RHet	3215567	3215567	3217239	1.24e-10	0.0286	S2_DM
2L_22686969_SNP	3.52e-11	0.0495	XLOC_006268	2R	21910	21910	24748	8.77e-07	0.0286	S2_DM
2L_22686969_SNP	1.49e-10	0.045	XLOC_011651	2RHet	861402	861402	862533	8.77e-07	0.0286	S2_DM
2L_22686969_SNP	3.13e-07	0.0486	XLOC_011942	2RHet	1262608	1258487	1262608	8.77e-07	0.0286	S2_DM
2L_22687144_SNP	2.32e-07	0.0495	XLOC_006268	2R	21910	21910	24748	5.93e-07	0.0286	S2_DM
2L_22687144_SNP	9.01e-06	0.045	XLOC_011651	2RHet	861402	861402	862533	5.93e-07	0.0286	S2_DM
2L_22687625_SNP	4.43e-08	0.05	FBgn0262887	2L	22961737	22961737	22963456	1.05e-09	0.0286	S2_DM
2L_22687625_SNP	1.97e-06	0.045	XLOC_011651	2RHet	861402	861402	862533	1.05e-09	0.0286	S2_DM
2L_22687793_SNP	8.48e-07	0.045	XLOC_011651	2RHet	861402	861402	862533	2.83e-07	0.0286	S2_DM
2L_22687857_DEL	6.33e-07	0.0495	XLOC_006268	2R	21910	21910	24748	3.34e-08	0.0286	S2_DM
2L_22687857_DEL	1.13e-07	0.045	XLOC_011651	2RHet	861402	861402	862533	3.34e-08	0.0286	S2_DM
2L_22687890_SNP	1.19e-07	0.0495	XLOC_006268	2R	21910	21910	24748	4.45e-08	0.0286	S2_DM
2L_22687890_SNP	1.81e-08	0.045	XLOC_011651	2RHet	861402	861402	862533	4.45e-08	0.0286	S2_DM
2L_22688100_SNP	1.06e-06	0.0314	FBgn0023090	2L	21361216	21361216	21367288	2.41e-12	0.0286	S2_DM
2L_22688100_SNP	1.98e-06	0.05	FBgn0262887	2L	22961737	22961737	22963456	2.41e-12	0.0286	S2_DM
2L_22688100_SNP	9.98e-06	0.0495	XLOC_006268	2R	21910	21910	24748	2.41e-12	0.0286	S2_DM
2L_22688100_SNP	5.22e-09	0.045	XLOC_011651	2RHet	861402	861402	862533	2.41e-12	0.0286	S2_DM
2L_22688117_SNP	1.25e-06	0.0314	FBgn0023090	2L	21361216	21361216	21367288	1.05e-11	0.0286	S2_DM
2L_22688117_SNP	2.75e-06	0.05	FBgn0262887	2L	22961737	22961737	22963456	1.05e-11	0.0286	S2_DM
2L_22688117_SNP	7.72e-06	0.0495	XLOC_006268	2R	21910	21910	24748	1.05e-11	0.0286	S2_DM
2L_22688117_SNP	1.03e-08	0.045	XLOC_011651	2RHet	861402	861402	862533	1.05e-11	0.0286	S2_DM
2L_22688122_SNP	8.43e-06	0.0314	FBgn0023090	2L	21361216	21361216	21367288	4.92e-10	0.0286	S2_DM
2L_22688125_SNP	3.5e-06	0.0314	FBgn0023090	2L	21361216	21361216	21367288	1.82e-09	0.0286	S2_DM
2L_22690031_SNP	1.27e-06	0.045	XLOC_011651	2RHet	861402	861402	862533	1.21e-10	0.0286	S2_DM
2L_22690032_INS	2.71e-06	0.045	XLOC_011651	2RHet	861402	861402	862533	1.64e-10	0.0286	S2_DM
2L_22690315_SNP	6.64e-07	0.0314	FBgn0023090	2L	21361216	21361216	21367288	1.27e-10	0.0286	S2_DM
2L_22690315_SNP	1.29e-08	0.045	XLOC_011651	2RHet	861402	861402	862533	1.27e-10	0.0286	S2_DM
2L_22691025_SNP	4.43e-08	0.0314	FBgn0023090	2L	21361216	21361216	21367288	1.51e-11	0.0286	S2_DM
2L_22691025_SNP	3.47e-06	0.0495	XLOC_006268	2R	21910	21910	24748	1.51e-11	0.0286	S2_DM
2L_22691025_SNP	1.05e-08	0.045	XLOC_011651	2RHet	861402	861402	862533	1.51e-11	0.0286	S2_DM
2L_22691028_SNP	2.4e-07	0.0314	FBgn0023090	2L	21361216	21361216	21367288	2.94e-11	0.0286	S2_DM
2L_22691028_SNP	7.79e-06	0.05	FBgn0262887	2L	22961737	22961737	22963456	2.94e-11	0.0286	S2_DM
2L_22691028_SNP	9.42e-06	0.0495	XLOC_006268	2R	21910	21910	24748	2.94e-11	0.0286	S2_DM
2L_22691028_SNP	1.28e-08	0.045	XLOC_011651	2RHet	861402	861402	862533	2.94e-11	0.0286	S2_DM
2L_22691148_SNP	7.23e-07	0.0314	FBgn0023090	2L	21361216	21361216	21367288	2.05e-08	0.0286	S2_DM
2L_22691148_SNP	1.3e-07	0.045	XLOC_011651	2RHet	861402	861402	862533	2.05e-08	0.0286	S2_DM
2L_22691317_SNP	2.23e-08	0.0314	FBgn0023090	2L	21361216	21361216	21367288	4.85e-09	0.0286	S2_DM
2L_22691317_SNP	1.28e-08	0.045	XLOC_011651	2RHet	861402	861402	862533	4.85e-09	0.0286	S2_DM
2L_22691676_SNP	1.8e-06	0.0314	FBgn0023090	2L	21361216	21361216	21367288	2.24e-11	0.0286	S2_DM
2L_22691676_SNP	7.18e-06	0.05	FBgn0262887	2L	22961737	22961737	22963456	2.24e-11	0.0286	S2_DM
2L_22691676_SNP	2.21e-06	0.0495	XLOC_006268	2R	21910	21910	24748	2.24e-11	0.0286	S2_DM
2L_22691676_SNP	4.44e-09	0.045	XLOC_011651	2RHet	861402	861402	862533	2.24e-11	0.0286	S2_DM
2L_22691722_SNP	1.91e-06	0.0314	FBgn0023090	2L	21361216	21361216	21367288	1.75e-09	0.0286	S2_DM
2L_22691722_SNP	1.99e-06	0.0495	XLOC_006268	2R	21910	21910	24748	1.75e-09	0.0286	S2_DM
2L_22691722_SNP	5.44e-09	0.045	XLOC_011651	2RHet	861402	861402	862533	1.75e-09	0.0286	S2_DM
2L_22691918_SNP	4.14e-07	0.0314	FBgn0023090	2L	21361216	21361216	21367288	8.27e-10	0.0286	S2_DM
2L_22691918_SNP	2.38e-08	0.045	XLOC_011651	2RHet	861402	861402	862533	8.27e-10	0.0286	S2_DM
2L_22692138_SNP	8.5e-07	0.0314	FBgn0023090	2L	21361216	21361216	21367288	5.32e-11	0.0286	S2_DM
2L_22692138_SNP	1.82e-06	0.05	FBgn0262887	2L	22961737	22961737	22963456	5.32e-11	0.0286	S2_DM
2L_22692138_SNP	7.55e-09	0.045	XLOC_011651	2RHet	861402	861402	862533	5.32e-11	0.0286	S2_DM
2L_22692148_SNP	4.16e-07	0.0314	FBgn0023090	2L	21361216	21361216	21367288	3.55e-11	0.0286	S2_DM
2L_22692148_SNP	1.89e-06	0.05	FBgn0262887	2L	22961737	22961737	22963456	3.55e-11	0.0286	S2_DM
2L_22692148_SNP	8.35e-06	0.0495	XLOC_006268	2R	21910	21910	24748	3.55e-11	0.0286	S2_DM
2L_22692148_SNP	1.67e-09	0.045	XLOC_011651	2RHet	861402	861402	862533	3.55e-11	0.0286	S2_DM
2L_22692326_SNP	1.13e-06	0.0314	FBgn0023090	2L	21361216	21361216	21367288	2.32e-11	0.0286	S2_DM
2L_22692326_SNP	5.42e-09	0.045	XLOC_011651	2RHet	861402	861402	862533	2.32e-11	0.0286	S2_DM
2L_22692399_INS	1.33e-06	0.045	XLOC_011651	2RHet	861402	861402	862533	3.08e-11	0.0286	S2_DM
2L_22692498_SNP	1.33e-06	0.0314	FBgn0023090	2L	21361216	21361216	21367288	3.58e-11	0.0286	S2_DM
2L_22692498_SNP	2.24e-06	0.05	FBgn0262887	2L	22961737	22961737	22963456	3.58e-11	0.0286	S2_DM
2L_22692498_SNP	9.03e-09	0.045	XLOC_011651	2RHet	861402	861402	862533	3.58e-11	0.0286	S2_DM
2L_22692512_SNP	3.88e-06	0.0314	FBgn0023090	2L	21361216	21361216	21367288	6.65e-12	0.0286	S2_DM
2L_22692512_SNP	3.71e-06	0.05	FBgn0262887	2L	22961737	22961737	22963456	6.65e-12	0.0286	S2_DM
2L_22692512_SNP	1.14e-08	0.045	XLOC_011651	2RHet	861402	861402	862533	6.65e-12	0.0286	S2_DM
2L_22692567_SNP	3.31e-06	0.05	FBgn0262887	2L	22961737	22961737	22963456	4.87e-11	0.0286	S2_DM
2L_22692567_SNP	3.57e-09	0.045	XLOC_011651	2RHet	861402	861402	862533	4.87e-11	0.0286	S2_DM
2L_22692617_SNP	3.3e-07	0.05	FBgn0262887	2L	22961737	22961737	22963456	4.99e-08	0.0286	S2_DM
2L_22692617_SNP	6.76e-07	0.0495	XLOC_006268	2R	21910	21910	24748	4.99e-08	0.0286	S2_DM
2L_22692617_SNP	1.9e-10	0.045	XLOC_011651	2RHet	861402	861402	862533	4.99e-08	0.0286	S2_DM
2L_22692661_SNP	1.3e-07	0.0314	FBgn0023090	2L	21361216	21361216	21367288	2.1e-11	0.0286	S2_DM
2L_22692661_SNP	2.75e-06	0.05	FBgn0262887	2L	22961737	22961737	22963456	2.1e-11	0.0286	S2_DM
2L_22692661_SNP	1.25e-07	0.045	XLOC_011651	2RHet	861402	861402	862533	2.1e-11	0.0286	S2_DM
2L_22693039_SNP	1.84e-06	0.0314	FBgn0023090	2L	21361216	21361216	21367288	2.3e-11	0.0286	S2_DM
2L_22693039_SNP	1.61e-06	0.05	FBgn0262887	2L	22961737	22961737	22963456	2.3e-11	0.0286	S2_DM
2L_22693039_SNP	6.25e-06	0.0495	XLOC_006268	2R	21910	21910	24748	2.3e-11	0.0286	S2_DM
2L_22693039_SNP	2.38e-09	0.045	XLOC_011651	2RHet	861402	861402	862533	2.3e-11	0.0286	S2_DM
2L_22693626_SNP	4.05e-07	0.0314	FBgn0023090	2L	21361216	21361216	21367288	3.72e-12	0.0286	S2_DM
2L_22693626_SNP	1.92e-06	0.05	FBgn0262887	2L	22961737	22961737	22963456	3.72e-12	0.0286	S2_DM
2L_22693626_SNP	8.48e-09	0.045	XLOC_011651	2RHet	861402	861402	862533	3.72e-12	0.0286	S2_DM
2L_22693805_DEL	3.79e-06	0.05	FBgn0262887	2L	22961737	22961737	22963456	4.21e-11	0.0286	S2_DM
2L_22693805_DEL	2.37e-06	0.045	XLOC_011651	2RHet	861402	861402	862533	4.21e-11	0.0286	S2_DM
2L_22696603_SNP	3.69e-06	0.05	FBgn0262887	2L	22961737	22961737	22963456	1.84e-12	0.0286	S2_DM
2L_22696603_SNP	2.85e-07	0.045	XLOC_011651	2RHet	861402	861402	862533	1.84e-12	0.0286	S2_DM
2L_22696650_SNP	1.27e-06	0.05	FBgn0262887	2L	22961737	22961737	22963456	4.02e-12	0.0286	S2_DM
2L_22696650_SNP	2.24e-07	0.045	XLOC_011651	2RHet	861402	861402	862533	4.02e-12	0.0286	S2_DM
2L_22696693_SNP	2.72e-06	0.05	FBgn0262887	2L	22961737	22961737	22963456	8.56e-11	0.0286	S2_DM
2L_22696693_SNP	2.57e-07	0.045	XLOC_011651	2RHet	861402	861402	862533	8.56e-11	0.0286	S2_DM
2L_22696729_SNP	1.55e-06	0.0314	FBgn0023090	2L	21361216	21361216	21367288	1.23e-11	0.0286	S2_DM
2L_22696729_SNP	2.73e-06	0.05	FBgn0262887	2L	22961737	22961737	22963456	1.23e-11	0.0286	S2_DM
2L_22696729_SNP	6.02e-09	0.045	XLOC_011651	2RHet	861402	861402	862533	1.23e-11	0.0286	S2_DM
2L_22696750_SNP	2.62e-06	0.0314	FBgn0023090	2L	21361216	21361216	21367288	6.54e-11	0.0286	S2_DM
2L_22696750_SNP	1.56e-06	0.05	FBgn0262887	2L	22961737	22961737	22963456	6.54e-11	0.0286	S2_DM
2L_22696750_SNP	8.3e-06	0.0495	XLOC_006268	2R	21910	21910	24748	6.54e-11	0.0286	S2_DM
2L_22696750_SNP	3.49e-09	0.045	XLOC_011651	2RHet	861402	861402	862533	6.54e-11	0.0286	S2_DM
2L_22696992_SNP	9.45e-10	0.045	XLOC_011651	2RHet	861402	861402	862533	2.16e-06	0.0286	S2_DM
2L_22697053_SNP	3.33e-07	0.05	FBgn0262887	2L	22961737	22961737	22963456	5e-09	0.0286	S2_DM
2L_22697053_SNP	3.78e-07	0.0495	XLOC_006268	2R	21910	21910	24748	5e-09	0.0286	S2_DM
2L_22697053_SNP	3.09e-11	0.045	XLOC_011651	2RHet	861402	861402	862533	5e-09	0.0286	S2_DM
2L_22697053_SNP	6.86e-06	0.0486	XLOC_011942	2RHet	1262608	1258487	1262608	5e-09	0.0286	S2_DM
2L_22697092_SNP	1.57e-07	0.05	FBgn0262887	2L	22961737	22961737	22963456	1.26e-08	0.0286	S2_DM
2L_22697092_SNP	5.62e-07	0.0495	XLOC_006268	2R	21910	21910	24748	1.26e-08	0.0286	S2_DM
2L_22697092_SNP	5.38e-10	0.045	XLOC_011651	2RHet	861402	861402	862533	1.26e-08	0.0286	S2_DM
2L_22697192_SNP	1.8e-06	0.05	FBgn0262887	2L	22961737	22961737	22963456	1.75e-09	0.0286	S2_DM
2L_22697192_SNP	3.95e-07	0.0495	XLOC_006268	2R	21910	21910	24748	1.75e-09	0.0286	S2_DM
2L_22697192_SNP	9.02e-11	0.045	XLOC_011651	2RHet	861402	861402	862533	1.75e-09	0.0286	S2_DM
2L_22697331_DEL	2.24e-07	0.0314	FBgn0023090	2L	21361216	21361216	21367288	6.88e-12	0.0286	S2_DM
2L_22697331_DEL	3.84e-06	0.05	FBgn0262887	2L	22961737	22961737	22963456	6.88e-12	0.0286	S2_DM
2L_22697331_DEL	1.27e-08	0.045	XLOC_011651	2RHet	861402	861402	862533	6.88e-12	0.0286	S2_DM
2L_22697787_SNP	1.26e-06	0.0314	FBgn0023090	2L	21361216	21361216	21367288	4.19e-13	0.0286	S2_DM
2L_22697787_SNP	8.28e-06	0.05	FBgn0262887	2L	22961737	22961737	22963456	4.19e-13	0.0286	S2_DM
2L_22697787_SNP	3.01e-07	0.045	XLOC_011651	2RHet	861402	861402	862533	4.19e-13	0.0286	S2_DM
2L_22697834_SNP	9.71e-07	0.0314	FBgn0023090	2L	21361216	21361216	21367288	5.02e-12	0.0286	S2_DM
2L_22697834_SNP	3.29e-06	0.05	FBgn0262887	2L	22961737	22961737	22963456	5.02e-12	0.0286	S2_DM
2L_22697834_SNP	1.4e-08	0.045	XLOC_011651	2RHet	861402	861402	862533	5.02e-12	0.0286	S2_DM
2L_22697883_DEL	9.31e-07	0.0314	FBgn0023090	2L	21361216	21361216	21367288	4.58e-10	0.0286	S2_DM
2L_22697883_DEL	6.73e-06	0.05	FBgn0262887	2L	22961737	22961737	22963456	4.58e-10	0.0286	S2_DM
2L_22697883_DEL	4.7e-09	0.045	XLOC_011651	2RHet	861402	861402	862533	4.58e-10	0.0286	S2_DM
2L_22697954_SNP	1.36e-07	0.0495	XLOC_006268	2R	21910	21910	24748	1.19e-07	0.0286	S2_DM
2L_22697954_SNP	2.18e-08	0.045	XLOC_011651	2RHet	861402	861402	862533	1.19e-07	0.0286	S2_DM
2L_22698000_SNP	2.28e-07	0.0495	XLOC_006268	2R	21910	21910	24748	2.33e-09	0.0286	S2_DM
2L_22698000_SNP	7.73e-09	0.045	XLOC_011651	2RHet	861402	861402	862533	2.33e-09	0.0286	S2_DM
2L_22698000_SNP	5.54e-06	0.0486	XLOC_011942	2RHet	1262608	1258487	1262608	2.33e-09	0.0286	S2_DM
2L_22698024_INS	4.87e-08	0.0495	XLOC_006268	2R	21910	21910	24748	4.53e-08	0.0286	S2_DM
2L_22698024_INS	5.24e-09	0.045	XLOC_011651	2RHet	861402	861402	862533	4.53e-08	0.0286	S2_DM
2L_22698305_SNP	9.1e-07	0.0314	FBgn0023090	2L	21361216	21361216	21367288	3.33e-12	0.0286	S2_DM
2L_22698305_SNP	7.33e-06	0.05	FBgn0262887	2L	22961737	22961737	22963456	3.33e-12	0.0286	S2_DM
2L_22698305_SNP	5.93e-09	0.045	XLOC_011651	2RHet	861402	861402	862533	3.33e-12	0.0286	S2_DM
2L_22698629_SNP	2.27e-07	0.0314	FBgn0023090	2L	21361216	21361216	21367288	1.72e-10	0.0286	S2_DM
2L_22698629_SNP	1.7e-08	0.045	XLOC_011651	2RHet	861402	861402	862533	1.72e-10	0.0286	S2_DM
2L_22699054_DEL	1.53e-06	0.0314	FBgn0023090	2L	21361216	21361216	21367288	6.37e-11	0.0286	S2_DM
2L_22699054_DEL	6.02e-07	0.045	XLOC_011651	2RHet	861402	861402	862533	6.37e-11	0.0286	S2_DM
2L_22699177_SNP	3.66e-06	0.05	FBgn0262887	2L	22961737	22961737	22963456	1.37e-11	0.0286	S2_DM
2L_22699177_SNP	2.63e-07	0.045	XLOC_011651	2RHet	861402	861402	862533	1.37e-11	0.0286	S2_DM
2L_22699184_SNP	4.39e-06	0.0314	FBgn0023090	2L	21361216	21361216	21367288	6.7e-13	0.0286	S2_DM
2L_22699184_SNP	1.8e-06	0.05	FBgn0262887	2L	22961737	22961737	22963456	6.7e-13	0.0286	S2_DM
2L_22699184_SNP	1.74e-08	0.045	XLOC_011651	2RHet	861402	861402	862533	6.7e-13	0.0286	S2_DM
2L_22699201_SNP	8.02e-06	0.05	FBgn0262887	2L	22961737	22961737	22963456	3.08e-11	0.0286	S2_DM
2L_22699201_SNP	5.04e-08	0.045	XLOC_011651	2RHet	861402	861402	862533	3.08e-11	0.0286	S2_DM
2L_22700043_SNP	1.19e-06	0.0314	FBgn0023090	2L	21361216	21361216	21367288	5.38e-11	0.0286	S2_DM
2L_22700043_SNP	2.65e-06	0.05	FBgn0262887	2L	22961737	22961737	22963456	5.38e-11	0.0286	S2_DM
2L_22700043_SNP	7.83e-06	0.0495	XLOC_006268	2R	21910	21910	24748	5.38e-11	0.0286	S2_DM
2L_22700043_SNP	6.5e-09	0.045	XLOC_011651	2RHet	861402	861402	862533	5.38e-11	0.0286	S2_DM
2L_22700093_SNP	7.92e-07	0.0314	FBgn0023090	2L	21361216	21361216	21367288	2.85e-13	0.0286	S2_DM
2L_22700093_SNP	7.61e-06	0.05	FBgn0262887	2L	22961737	22961737	22963456	2.85e-13	0.0286	S2_DM
2L_22700093_SNP	4.46e-08	0.045	XLOC_011651	2RHet	861402	861402	862533	2.85e-13	0.0286	S2_DM
2L_22700129_SNP	3.63e-07	0.0314	FBgn0023090	2L	21361216	21361216	21367288	8.28e-15	0.0286	S2_DM
2L_22700129_SNP	6.78e-06	0.05	FBgn0262887	2L	22961737	22961737	22963456	8.28e-15	0.0286	S2_DM
2L_22700129_SNP	1.66e-07	0.045	XLOC_011651	2RHet	861402	861402	862533	8.28e-15	0.0286	S2_DM
2L_22700255_SNP	8.99e-07	0.0314	FBgn0023090	2L	21361216	21361216	21367288	1.54e-12	0.0286	S2_DM
2L_22700255_SNP	1.83e-06	0.05	FBgn0262887	2L	22961737	22961737	22963456	1.54e-12	0.0286	S2_DM
2L_22700255_SNP	4.48e-08	0.045	XLOC_011651	2RHet	861402	861402	862533	1.54e-12	0.0286	S2_DM
2L_22701028_SNP	3.75e-08	0.0495	XLOC_006268	2R	21910	21910	24748	2.15e-07	0.0286	S2_DM
2L_22701028_SNP	7.82e-08	0.045	XLOC_011651	2RHet	861402	861402	862533	2.15e-07	0.0286	S2_DM
2L_22701088_DEL	3.84e-06	0.05	FBgn0262887	2L	22961737	22961737	22963456	1.59e-06	0.0286	S2_DM
2L_22701340_SNP	1.93e-07	0.0314	FBgn0023090	2L	21361216	21361216	21367288	9.06e-11	0.0286	S2_DM
2L_22701340_SNP	6.33e-07	0.05	FBgn0262887	2L	22961737	22961737	22963456	9.06e-11	0.0286	S2_DM
2L_22701340_SNP	6.05e-09	0.045	XLOC_011651	2RHet	861402	861402	862533	9.06e-11	0.0286	S2_DM
2L_22701341_SNP	1.89e-06	0.0314	FBgn0023090	2L	21361216	21361216	21367288	2.75e-11	0.0286	S2_DM
2L_22701341_SNP	1.93e-06	0.05	FBgn0262887	2L	22961737	22961737	22963456	2.75e-11	0.0286	S2_DM
2L_22701341_SNP	5.88e-06	0.0495	XLOC_006268	2R	21910	21910	24748	2.75e-11	0.0286	S2_DM
2L_22701341_SNP	2e-09	0.045	XLOC_011651	2RHet	861402	861402	862533	2.75e-11	0.0286	S2_DM
2L_22701714_SNP	6.66e-06	0.0314	FBgn0023090	2L	21361216	21361216	21367288	7.19e-13	0.0286	S2_DM
2L_22701714_SNP	7.18e-06	0.05	FBgn0262887	2L	22961737	22961737	22963456	7.19e-13	0.0286	S2_DM
2L_22701714_SNP	5.69e-08	0.045	XLOC_011651	2RHet	861402	861402	862533	7.19e-13	0.0286	S2_DM
2L_22701809_SNP	1.74e-07	0.045	XLOC_011651	2RHet	861402	861402	862533	8.76e-12	0.0286	S2_DM
2L_22701837_SNP	4.68e-06	0.0314	FBgn0023090	2L	21361216	21361216	21367288	4.61e-12	0.0286	S2_DM
2L_22701837_SNP	4.73e-06	0.05	FBgn0262887	2L	22961737	22961737	22963456	4.61e-12	0.0286	S2_DM
2L_22701837_SNP	1.17e-08	0.045	XLOC_011651	2RHet	861402	861402	862533	4.61e-12	0.0286	S2_DM
2L_22701901_SNP	4.08e-06	0.0314	FBgn0023090	2L	21361216	21361216	21367288	2.28e-14	0.0286	S2_DM
2L_22701901_SNP	2.5e-06	0.05	FBgn0262887	2L	22961737	22961737	22963456	2.28e-14	0.0286	S2_DM
2L_22701901_SNP	8.3e-09	0.045	XLOC_011651	2RHet	861402	861402	862533	2.28e-14	0.0286	S2_DM
2L_22701901_SNP	3.46e-08	0.0494	XLOC_011853	2RHet	624599	623448	624599	2.28e-14	0.0286	S2_DM
2L_22701902_SNP	2.4e-06	0.05	FBgn0262887	2L	22961737	22961737	22963456	1.13e-14	0.0286	S2_DM
2L_22701902_SNP	6.97e-09	0.045	XLOC_011651	2RHet	861402	861402	862533	1.13e-14	0.0286	S2_DM
2L_22701902_SNP	2.92e-08	0.0494	XLOC_011853	2RHet	624599	623448	624599	1.13e-14	0.0286	S2_DM
2L_22701911_INS	7.81e-06	0.0314	FBgn0023090	2L	21361216	21361216	21367288	2.34e-13	0.0286	S2_DM
2L_22701911_INS	1.48e-09	0.045	XLOC_011651	2RHet	861402	861402	862533	2.34e-13	0.0286	S2_DM
2L_22701911_INS	2.19e-08	0.0494	XLOC_011853	2RHet	624599	623448	624599	2.34e-13	0.0286	S2_DM
2L_22701983_SNP	3.3e-06	0.05	FBgn0262887	2L	22961737	22961737	22963456	1.23e-14	0.0286	S2_DM
2L_22701983_SNP	1.06e-08	0.045	XLOC_011651	2RHet	861402	861402	862533	1.23e-14	0.0286	S2_DM
2L_22701983_SNP	2.07e-08	0.0494	XLOC_011853	2RHet	624599	623448	624599	1.23e-14	0.0286	S2_DM
2L_22702038_SNP	5.35e-06	0.05	FBgn0262887	2L	22961737	22961737	22963456	5.88e-14	0.0286	S2_DM
2L_22702038_SNP	1.4e-08	0.045	XLOC_011651	2RHet	861402	861402	862533	5.88e-14	0.0286	S2_DM
2L_22702038_SNP	4.92e-08	0.0494	XLOC_011853	2RHet	624599	623448	624599	5.88e-14	0.0286	S2_DM
2L_22702053_SNP	6.63e-06	0.0314	FBgn0023090	2L	21361216	21361216	21367288	2.58e-12	0.0286	S2_DM
2L_22702053_SNP	4.04e-06	0.05	FBgn0262887	2L	22961737	22961737	22963456	2.58e-12	0.0286	S2_DM
2L_22702053_SNP	1.74e-08	0.045	XLOC_011651	2RHet	861402	861402	862533	2.58e-12	0.0286	S2_DM
2L_22702097_SNP	3.83e-06	0.05	FBgn0262887	2L	22961737	22961737	22963456	1.5e-11	0.0286	S2_DM
2L_22702097_SNP	7.77e-09	0.045	XLOC_011651	2RHet	861402	861402	862533	1.5e-11	0.0286	S2_DM
2L_22702590_SNP	2.69e-08	0.045	XLOC_011651	2RHet	861402	861402	862533	9.5e-08	0.0286	S2_DM
2L_22702591_SNP	4.94e-08	0.045	XLOC_011651	2RHet	861402	861402	862533	1.31e-07	0.0286	S2_DM
2L_22702656_SNP	3.54e-07	0.0492	FBgn0085732	2RHet	337700	337700	340299	3.76e-06	0.0286	S2_DM
2L_22702656_SNP	7.46e-09	0.045	XLOC_011651	2RHet	861402	861402	862533	3.76e-06	0.0286	S2_DM
2L_22702720_SNP	3.06e-08	0.045	XLOC_011651	2RHet	861402	861402	862533	1.85e-06	0.0286	S2_DM
2L_22703049_SNP	7.8e-06	0.0314	FBgn0023090	2L	21361216	21361216	21367288	2.29e-10	0.0286	S2_DM
2L_22703049_SNP	1.12e-06	0.05	FBgn0262887	2L	22961737	22961737	22963456	2.29e-10	0.0286	S2_DM
2L_22703049_SNP	4.13e-06	0.0495	XLOC_006268	2R	21910	21910	24748	2.29e-10	0.0286	S2_DM
2L_22703049_SNP	6.27e-09	0.045	XLOC_011651	2RHet	861402	861402	862533	2.29e-10	0.0286	S2_DM
2L_22703486_SNP	5.8e-06	0.05	FBgn0262887	2L	22961737	22961737	22963456	1.09e-14	0.0286	S2_DM
2L_22703486_SNP	1.54e-08	0.045	XLOC_011651	2RHet	861402	861402	862533	1.09e-14	0.0286	S2_DM
2L_22703486_SNP	3.25e-08	0.0494	XLOC_011853	2RHet	624599	623448	624599	1.09e-14	0.0286	S2_DM
2L_22703540_SNP	2.81e-06	0.05	FBgn0262887	2L	22961737	22961737	22963456	3.62e-14	0.0286	S2_DM
2L_22703540_SNP	1.73e-08	0.045	XLOC_011651	2RHet	861402	861402	862533	3.62e-14	0.0286	S2_DM
2L_22703540_SNP	4.01e-08	0.0494	XLOC_011853	2RHet	624599	623448	624599	3.62e-14	0.0286	S2_DM
2L_22703614_INS	4.01e-08	0.0495	XLOC_006268	2R	21910	21910	24748	4.54e-07	0.0286	S2_DM
2L_22703614_INS	1.95e-10	0.045	XLOC_011651	2RHet	861402	861402	862533	4.54e-07	0.0286	S2_DM
2L_22703614_INS	2.18e-06	0.0486	XLOC_011942	2RHet	1262608	1258487	1262608	4.54e-07	0.0286	S2_DM
2L_22703616_SNP	3.18e-08	0.0495	XLOC_006268	2R	21910	21910	24748	9.85e-07	0.0286	S2_DM
2L_22703616_SNP	9.28e-11	0.045	XLOC_011651	2RHet	861402	861402	862533	9.85e-07	0.0286	S2_DM
2L_22703616_SNP	5.93e-06	0.0486	XLOC_011942	2RHet	1262608	1258487	1262608	9.85e-07	0.0286	S2_DM
2L_22703617_INS	1.11e-07	0.0495	XLOC_006268	2R	21910	21910	24748	6.5e-07	0.0286	S2_DM
2L_22703617_INS	9.42e-10	0.045	XLOC_011651	2RHet	861402	861402	862533	6.5e-07	0.0286	S2_DM
2L_22703617_INS	5.94e-06	0.0486	XLOC_011942	2RHet	1262608	1258487	1262608	6.5e-07	0.0286	S2_DM
2L_22703980_INS	6.86e-07	0.05	FBgn0262887	2L	22961737	22961737	22963456	2.72e-13	0.0286	S2_DM
2L_22703980_INS	5.64e-06	0.0495	XLOC_006268	2R	21910	21910	24748	2.72e-13	0.0286	S2_DM
2L_22703980_INS	2.16e-07	0.045	XLOC_011651	2RHet	861402	861402	862533	2.72e-13	0.0286	S2_DM
2L_22704006_SNP	2.07e-06	0.045	XLOC_011651	2RHet	861402	861402	862533	8.2e-12	0.0286	S2_DM
2L_22704006_SNP	6.38e-07	0.0482	XLOC_011789	2RHet	3215567	3215567	3217239	8.2e-12	0.0286	S2_DM
2L_22704115_SNP	6.28e-06	0.0495	XLOC_006268	2R	21910	21910	24748	1.05e-11	0.0286	S2_DM
2L_22704115_SNP	8.4e-09	0.045	XLOC_011651	2RHet	861402	861402	862533	1.05e-11	0.0286	S2_DM
2L_22704839_SNP	5.32e-06	0.0314	FBgn0023090	2L	21361216	21361216	21367288	2.87e-10	0.0286	S2_DM
2L_22704839_SNP	6.84e-06	0.05	FBgn0262887	2L	22961737	22961737	22963456	2.87e-10	0.0286	S2_DM
2L_22704839_SNP	4.1e-09	0.045	XLOC_011651	2RHet	861402	861402	862533	2.87e-10	0.0286	S2_DM
2L_22705046_SNP	5.96e-06	0.0314	FBgn0023090	2L	21361216	21361216	21367288	1.74e-11	0.0286	S2_DM
2L_22705046_SNP	9.68e-09	0.045	XLOC_011651	2RHet	861402	861402	862533	1.74e-11	0.0286	S2_DM
2L_22705381_SNP	7.31e-06	0.05	FBgn0262887	2L	22961737	22961737	22963456	1.96e-14	0.0286	S2_DM
2L_22705381_SNP	2.04e-08	0.045	XLOC_011651	2RHet	861402	861402	862533	1.96e-14	0.0286	S2_DM
2L_22705381_SNP	5.22e-08	0.0494	XLOC_011853	2RHet	624599	623448	624599	1.96e-14	0.0286	S2_DM
2L_22705383_SNP	9.23e-06	0.0314	FBgn0023090	2L	21361216	21361216	21367288	1.34e-14	0.0286	S2_DM
2L_22705383_SNP	5.81e-06	0.05	FBgn0262887	2L	22961737	22961737	22963456	1.34e-14	0.0286	S2_DM
2L_22705383_SNP	8.32e-09	0.045	XLOC_011651	2RHet	861402	861402	862533	1.34e-14	0.0286	S2_DM
2L_22705383_SNP	5.18e-08	0.0494	XLOC_011853	2RHet	624599	623448	624599	1.34e-14	0.0286	S2_DM
2L_22705388_SNP	7.09e-06	0.05	FBgn0262887	2L	22961737	22961737	22963456	7.8e-14	0.0286	S2_DM
2L_22705388_SNP	2.29e-08	0.045	XLOC_011651	2RHet	861402	861402	862533	7.8e-14	0.0286	S2_DM
2L_22705388_SNP	4.52e-08	0.0494	XLOC_011853	2RHet	624599	623448	624599	7.8e-14	0.0286	S2_DM
2L_22705654_SNP	6.51e-06	0.045	XLOC_011651	2RHet	861402	861402	862533	5.62e-12	0.0286	S2_DM
2L_22705654_SNP	7.14e-07	0.0482	XLOC_011789	2RHet	3215567	3215567	3217239	5.62e-12	0.0286	S2_DM
2L_22705945_SNP	4.19e-07	0.0314	FBgn0023090	2L	21361216	21361216	21367288	5.37e-14	0.0286	S2_DM
2L_22705945_SNP	3.08e-08	0.045	XLOC_011651	2RHet	861402	861402	862533	5.37e-14	0.0286	S2_DM
2L_22705945_SNP	4.51e-08	0.0494	XLOC_011853	2RHet	624599	623448	624599	5.37e-14	0.0286	S2_DM
2L_22705972_SNP	9.78e-07	0.0314	FBgn0023090	2L	21361216	21361216	21367288	3.97e-14	0.0286	S2_DM
2L_22705972_SNP	8.41e-06	0.05	FBgn0262887	2L	22961737	22961737	22963456	3.97e-14	0.0286	S2_DM
2L_22705972_SNP	2.38e-08	0.045	XLOC_011651	2RHet	861402	861402	862533	3.97e-14	0.0286	S2_DM
2L_22705972_SNP	9.7e-08	0.0494	XLOC_011853	2RHet	624599	623448	624599	3.97e-14	0.0286	S2_DM
2L_22705989_SNP	1.41e-06	0.045	XLOC_011651	2RHet	861402	861402	862533	1.01e-11	0.0286	S2_DM
2L_22705989_SNP	8.62e-07	0.0482	XLOC_011789	2RHet	3215567	3215567	3217239	1.01e-11	0.0286	S2_DM
2L_22706474_SNP	2.14e-07	0.0495	XLOC_006268	2R	21910	21910	24748	1.53e-06	0.0286	S2_DM
2L_22706474_SNP	3.01e-08	0.045	XLOC_011651	2RHet	861402	861402	862533	1.53e-06	0.0286	S2_DM
2L_22706474_SNP	6.55e-06	0.0486	XLOC_011942	2RHet	1262608	1258487	1262608	1.53e-06	0.0286	S2_DM
2L_22706884_SNP	2.05e-08	0.045	XLOC_011651	2RHet	861402	861402	862533	2.98e-12	0.0286	S2_DM
2L_22707387_SNP	3.79e-07	0.0495	XLOC_006268	2R	21910	21910	24748	2.95e-06	0.0286	S2_DM
2L_22707387_SNP	1.08e-08	0.045	XLOC_011651	2RHet	861402	861402	862533	2.95e-06	0.0286	S2_DM
2L_22707452_SNP	4.08e-06	0.05	FBgn0262887	2L	22961737	22961737	22963456	5.21e-14	0.0286	S2_DM
2L_22707452_SNP	9.16e-08	0.045	XLOC_011651	2RHet	861402	861402	862533	5.21e-14	0.0286	S2_DM
2L_22708066_SNP	4.15e-07	0.0314	FBgn0023090	2L	21361216	21361216	21367288	7e-11	0.0286	S2_DM
2L_22708066_SNP	4.35e-06	0.0495	XLOC_006268	2R	21910	21910	24748	7e-11	0.0286	S2_DM
2L_22708066_SNP	1.71e-08	0.045	XLOC_011651	2RHet	861402	861402	862533	7e-11	0.0286	S2_DM
2L_22708214_SNP	2.87e-06	0.0314	FBgn0023090	2L	21361216	21361216	21367288	1.24e-13	0.0286	S2_DM
2L_22708214_SNP	4.33e-06	0.05	FBgn0262887	2L	22961737	22961737	22963456	1.24e-13	0.0286	S2_DM
2L_22708214_SNP	5.95e-06	0.0495	XLOC_006268	2R	21910	21910	24748	1.24e-13	0.0286	S2_DM
2L_22708214_SNP	4.18e-09	0.045	XLOC_011651	2RHet	861402	861402	862533	1.24e-13	0.0286	S2_DM
2L_22708214_SNP	1.18e-08	0.0494	XLOC_011853	2RHet	624599	623448	624599	1.24e-13	0.0286	S2_DM
2L_22708330_SNP	6.12e-07	0.0314	FBgn0023090	2L	21361216	21361216	21367288	3.21e-12	0.0286	S2_DM
2L_22708330_SNP	4.19e-06	0.05	FBgn0262887	2L	22961737	22961737	22963456	3.21e-12	0.0286	S2_DM
2L_22708330_SNP	6.34e-08	0.045	XLOC_011651	2RHet	861402	861402	862533	3.21e-12	0.0286	S2_DM
2L_22709197_SNP	1.29e-06	0.0314	FBgn0023090	2L	21361216	21361216	21367288	2.75e-12	0.0286	S2_DM
2L_22709197_SNP	1.8e-09	0.045	XLOC_011651	2RHet	861402	861402	862533	2.75e-12	0.0286	S2_DM
2L_22709358_SNP	5.73e-06	0.045	XLOC_011651	2RHet	861402	861402	862533	2.31e-09	0.0286	S2_DM
2L_22709594_SNP	5.38e-06	0.0314	FBgn0023090	2L	21361216	21361216	21367288	2.5e-10	0.0286	S2_DM
2L_22709594_SNP	5.2e-07	0.05	FBgn0262887	2L	22961737	22961737	22963456	2.5e-10	0.0286	S2_DM
2L_22709594_SNP	6.76e-07	0.0495	XLOC_006268	2R	21910	21910	24748	2.5e-10	0.0286	S2_DM
2L_22709594_SNP	3.74e-10	0.045	XLOC_011651	2RHet	861402	861402	862533	2.5e-10	0.0286	S2_DM
2L_22709707_SNP	1.47e-06	0.0314	FBgn0023090	2L	21361216	21361216	21367288	3.65e-12	0.0286	S2_DM
2L_22709707_SNP	2.66e-06	0.05	FBgn0262887	2L	22961737	22961737	22963456	3.65e-12	0.0286	S2_DM
2L_22709707_SNP	5.6e-06	0.0495	XLOC_006268	2R	21910	21910	24748	3.65e-12	0.0286	S2_DM
2L_22709707_SNP	5.19e-08	0.045	XLOC_011651	2RHet	861402	861402	862533	3.65e-12	0.0286	S2_DM
2L_22710047_SNP	6.32e-06	0.05	FBgn0262887	2L	22961737	22961737	22963456	1.95e-07	0.0286	S2_DM
2L_22710177_SNP	2.04e-07	0.0482	XLOC_011789	2RHet	3215567	3215567	3217239	3.86e-10	0.0286	S2_DM
2L_22710677_SNP	6.89e-06	0.0314	FBgn0023090	2L	21361216	21361216	21367288	1.79e-14	0.0286	S2_DM
2L_22710677_SNP	4.79e-06	0.05	FBgn0262887	2L	22961737	22961737	22963456	1.79e-14	0.0286	S2_DM
2L_22710677_SNP	9.95e-08	0.045	XLOC_011651	2RHet	861402	861402	862533	1.79e-14	0.0286	S2_DM
2L_22710815_SNP	2.25e-07	0.045	FBgn0046706	2RHet	3199376	3199376	3234607	5.04e-06	0.0286	S2_DM
2L_22710815_SNP	2.72e-07	0.0497	XLOC_011663	2RHet	1111250	1111250	1139594	5.04e-06	0.0286	S2_DM
2L_22710815_SNP	7.94e-09	0.0441	XLOC_011704	2RHet	1921599	1921599	1923490	5.04e-06	0.0286	S2_DM
2L_22710815_SNP	8.21e-07	0.0494	XLOC_011705	2RHet	1924263	1924263	1926950	5.04e-06	0.0286	S2_DM
2L_22710815_SNP	9.83e-07	0.0482	XLOC_011789	2RHet	3215567	3215567	3217239	5.04e-06	0.0286	S2_DM
2L_22710815_SNP	1.22e-06	0.0482	XLOC_012081	2RHet	3151739	3149849	3151739	5.04e-06	0.0286	S2_DM
2L_22711193_SNP	8.72e-06	0.0495	XLOC_006268	2R	21910	21910	24748	1.58e-11	0.0286	S2_DM
2L_22711193_SNP	1.92e-07	0.045	XLOC_011651	2RHet	861402	861402	862533	1.58e-11	0.0286	S2_DM
2L_22711320_SNP	3.4e-06	0.0314	FBgn0023090	2L	21361216	21361216	21367288	1.91e-13	0.0286	S2_DM
2L_22711320_SNP	8.25e-06	0.05	FBgn0262887	2L	22961737	22961737	22963456	1.91e-13	0.0286	S2_DM
2L_22711320_SNP	2.42e-08	0.045	XLOC_011651	2RHet	861402	861402	862533	1.91e-13	0.0286	S2_DM
2L_22711320_SNP	4.04e-08	0.0494	XLOC_011853	2RHet	624599	623448	624599	1.91e-13	0.0286	S2_DM
2L_22711467_SNP	1.25e-06	0.0314	FBgn0023090	2L	21361216	21361216	21367288	1.15e-13	0.0286	S2_DM
2L_22711467_SNP	4.66e-06	0.05	FBgn0262887	2L	22961737	22961737	22963456	1.15e-13	0.0286	S2_DM
2L_22711467_SNP	2.21e-08	0.045	XLOC_011651	2RHet	861402	861402	862533	1.15e-13	0.0286	S2_DM
2L_22711467_SNP	5.18e-08	0.0494	XLOC_011853	2RHet	624599	623448	624599	1.15e-13	0.0286	S2_DM
2L_22711728_SNP	3.77e-07	0.0314	FBgn0023090	2L	21361216	21361216	21367288	1.13e-13	0.0286	S2_DM
2L_22711728_SNP	4.29e-08	0.045	XLOC_011651	2RHet	861402	861402	862533	1.13e-13	0.0286	S2_DM
2L_22711728_SNP	6.42e-08	0.0494	XLOC_011853	2RHet	624599	623448	624599	1.13e-13	0.0286	S2_DM
2L_22711802_SNP	2.13e-06	0.0314	FBgn0023090	2L	21361216	21361216	21367288	3.84e-14	0.0286	S2_DM
2L_22711802_SNP	8.84e-09	0.045	XLOC_011651	2RHet	861402	861402	862533	3.84e-14	0.0286	S2_DM
2L_22711802_SNP	8.37e-09	0.0494	XLOC_011853	2RHet	624599	623448	624599	3.84e-14	0.0286	S2_DM
2L_22712721_SNP	1.6e-06	0.0314	FBgn0023090	2L	21361216	21361216	21367288	1.2e-13	0.0286	S2_DM
2L_22712721_SNP	1.05e-06	0.05	FBgn0262887	2L	22961737	22961737	22963456	1.2e-13	0.0286	S2_DM
2L_22712721_SNP	1.78e-08	0.045	XLOC_011651	2RHet	861402	861402	862533	1.2e-13	0.0286	S2_DM
2L_22713116_SNP	3.74e-06	0.05	FBgn0262887	2L	22961737	22961737	22963456	5.47e-08	0.0286	S2_DM
2L_22713542_SNP	1.25e-06	0.045	XLOC_011651	2RHet	861402	861402	862533	3.62e-15	0.0286	S2_DM
2L_22713824_SNP	6.43e-06	0.05	FBgn0262887	2L	22961737	22961737	22963456	4.45e-12	0.0286	S2_DM
2L_22713824_SNP	1.99e-08	0.045	XLOC_011651	2RHet	861402	861402	862533	4.45e-12	0.0286	S2_DM
2L_22713985_SNP	1.19e-06	0.0314	FBgn0023090	2L	21361216	21361216	21367288	6.02e-14	0.0286	S2_DM
2L_22713985_SNP	1.56e-08	0.045	XLOC_011651	2RHet	861402	861402	862533	6.02e-14	0.0286	S2_DM
2L_22713985_SNP	2.01e-08	0.0494	XLOC_011853	2RHet	624599	623448	624599	6.02e-14	0.0286	S2_DM
2L_22715271_SNP	5.1e-06	0.0314	FBgn0023090	2L	21361216	21361216	21367288	5.14e-12	0.0286	S2_DM
2L_22715271_SNP	1.08e-06	0.05	FBgn0262887	2L	22961737	22961737	22963456	5.14e-12	0.0286	S2_DM
2L_22715271_SNP	5.57e-06	0.0495	XLOC_006268	2R	21910	21910	24748	5.14e-12	0.0286	S2_DM
2L_22715271_SNP	1.51e-09	0.045	XLOC_011651	2RHet	861402	861402	862533	5.14e-12	0.0286	S2_DM
2L_22715818_SNP	3.2e-06	0.05	FBgn0262887	2L	22961737	22961737	22963456	5.19e-10	0.0286	S2_DM
2L_22715818_SNP	1.4e-07	0.045	XLOC_011651	2RHet	861402	861402	862533	5.19e-10	0.0286	S2_DM
2L_22716409_SNP	1.11e-07	0.05	FBgn0262887	2L	22961737	22961737	22963456	2.21e-08	0.0286	S2_DM
2L_22716409_SNP	6.22e-11	0.045	XLOC_011651	2RHet	861402	861402	862533	2.21e-08	0.0286	S2_DM
2L_22716409_SNP	5.09e-06	0.0486	XLOC_011942	2RHet	1262608	1258487	1262608	2.21e-08	0.0286	S2_DM
2L_22716611_SNP	4.46e-08	0.05	FBgn0262887	2L	22961737	22961737	22963456	5.27e-08	0.0286	S2_DM
2L_22716611_SNP	7.6e-06	0.0495	XLOC_006268	2R	21910	21910	24748	5.27e-08	0.0286	S2_DM
2L_22716611_SNP	1.81e-11	0.045	XLOC_011651	2RHet	861402	861402	862533	5.27e-08	0.0286	S2_DM
2L_22717146_SNP	5.14e-06	0.05	FBgn0262887	2L	22961737	22961737	22963456	6.85e-13	0.0286	S2_DM
2L_22717146_SNP	6.74e-09	0.045	XLOC_011651	2RHet	861402	861402	862533	6.85e-13	0.0286	S2_DM
2L_22723810_SNP	9.13e-07	0.0314	FBgn0023090	2L	21361216	21361216	21367288	1.75e-11	0.0286	S2_DM
2L_22723810_SNP	2.12e-07	0.05	FBgn0262887	2L	22961737	22961737	22963456	1.75e-11	0.0286	S2_DM
2L_22723810_SNP	8.29e-09	0.045	XLOC_011651	2RHet	861402	861402	862533	1.75e-11	0.0286	S2_DM
2L_22723814_SNP	3.48e-06	0.0314	FBgn0023090	2L	21361216	21361216	21367288	2.43e-11	0.0286	S2_DM
2L_22723814_SNP	6.08e-07	0.05	FBgn0262887	2L	22961737	22961737	22963456	2.43e-11	0.0286	S2_DM
2L_22723814_SNP	4.3e-09	0.045	XLOC_011651	2RHet	861402	861402	862533	2.43e-11	0.0286	S2_DM
2L_22723821_SNP	8.99e-07	0.0314	FBgn0023090	2L	21361216	21361216	21367288	1.15e-10	0.0286	S2_DM
2L_22723821_SNP	6.05e-08	0.05	FBgn0262887	2L	22961737	22961737	22963456	1.15e-10	0.0286	S2_DM
2L_22723821_SNP	5.53e-09	0.045	XLOC_011651	2RHet	861402	861402	862533	1.15e-10	0.0286	S2_DM
2L_22726036_SNP	5.49e-06	0.0314	FBgn0023090	2L	21361216	21361216	21367288	1.14e-09	0.0286	S2_DM
2L_22726036_SNP	5.36e-08	0.045	XLOC_011651	2RHet	861402	861402	862533	1.14e-09	0.0286	S2_DM
2L_22728610_SNP	1.67e-06	0.0314	FBgn0023090	2L	21361216	21361216	21367288	1.51e-13	0.0286	S2_DM
2L_22728610_SNP	1.18e-07	0.045	XLOC_011651	2RHet	861402	861402	862533	1.51e-13	0.0286	S2_DM
2L_22728610_SNP	9.44e-09	0.0494	XLOC_011853	2RHet	624599	623448	624599	1.51e-13	0.0286	S2_DM
2L_22732421_SNP	2.43e-09	0.0495	XLOC_006268	2R	21910	21910	24748	1.76e-06	0.0286	S2_DM
2L_22732421_SNP	2.25e-09	0.045	XLOC_011651	2RHet	861402	861402	862533	1.76e-06	0.0286	S2_DM
2L_22732421_SNP	5.18e-07	0.0486	XLOC_011942	2RHet	1262608	1258487	1262608	1.76e-06	0.0286	S2_DM
2L_22732854_DEL	1.75e-06	0.05	FBgn0262887	2L	22961737	22961737	22963456	2.66e-13	0.0286	S2_DM
2L_22732854_DEL	2.52e-07	0.045	XLOC_011651	2RHet	861402	861402	862533	2.66e-13	0.0286	S2_DM
2L_22733027_SNP	7.81e-06	0.0314	FBgn0023090	2L	21361216	21361216	21367288	1.44e-14	0.0286	S2_DM
2L_22733027_SNP	3.88e-06	0.05	FBgn0262887	2L	22961737	22961737	22963456	1.44e-14	0.0286	S2_DM
2L_22733027_SNP	1.25e-08	0.045	XLOC_011651	2RHet	861402	861402	862533	1.44e-14	0.0286	S2_DM
2L_22733027_SNP	1.91e-08	0.0494	XLOC_011853	2RHet	624599	623448	624599	1.44e-14	0.0286	S2_DM
2L_22733142_SNP	4.37e-07	0.0482	XLOC_011789	2RHet	3215567	3215567	3217239	1.06e-09	0.0286	S2_DM
2L_22733703_SNP	2.68e-06	0.0314	FBgn0023090	2L	21361216	21361216	21367288	2.32e-12	0.0286	S2_DM
2L_22733703_SNP	4e-06	0.05	FBgn0262887	2L	22961737	22961737	22963456	2.32e-12	0.0286	S2_DM
2L_22733703_SNP	4.32e-09	0.045	XLOC_011651	2RHet	861402	861402	862533	2.32e-12	0.0286	S2_DM
2L_22733874_SNP	3.17e-06	0.0314	FBgn0023090	2L	21361216	21361216	21367288	3.78e-12	0.0286	S2_DM
2L_22733874_SNP	7.28e-07	0.05	FBgn0262887	2L	22961737	22961737	22963456	3.78e-12	0.0286	S2_DM
2L_22733874_SNP	3.82e-06	0.0495	XLOC_006268	2R	21910	21910	24748	3.78e-12	0.0286	S2_DM
2L_22733874_SNP	4.86e-09	0.045	XLOC_011651	2RHet	861402	861402	862533	3.78e-12	0.0286	S2_DM
2L_22733935_SNP	5.04e-06	0.0314	FBgn0023090	2L	21361216	21361216	21367288	3.47e-14	0.0286	S2_DM
2L_22733935_SNP	8.58e-06	0.05	FBgn0262887	2L	22961737	22961737	22963456	3.47e-14	0.0286	S2_DM
2L_22733935_SNP	6.3e-09	0.045	XLOC_011651	2RHet	861402	861402	862533	3.47e-14	0.0286	S2_DM
2L_22733935_SNP	2.45e-08	0.0494	XLOC_011853	2RHet	624599	623448	624599	3.47e-14	0.0286	S2_DM
2L_22733967_SNP	9.31e-06	0.0314	FBgn0023090	2L	21361216	21361216	21367288	2.17e-14	0.0286	S2_DM
2L_22733967_SNP	6.6e-06	0.05	FBgn0262887	2L	22961737	22961737	22963456	2.17e-14	0.0286	S2_DM
2L_22733967_SNP	2.42e-08	0.045	XLOC_011651	2RHet	861402	861402	862533	2.17e-14	0.0286	S2_DM
2L_22733967_SNP	1.6e-08	0.0494	XLOC_011853	2RHet	624599	623448	624599	2.17e-14	0.0286	S2_DM
2L_22734067_SNP	6.86e-06	0.0314	FBgn0023090	2L	21361216	21361216	21367288	2.19e-11	0.0286	S2_DM
2L_22734067_SNP	6.09e-06	0.05	FBgn0262887	2L	22961737	22961737	22963456	2.19e-11	0.0286	S2_DM
2L_22734067_SNP	6.05e-06	0.0495	XLOC_006268	2R	21910	21910	24748	2.19e-11	0.0286	S2_DM
2L_22734067_SNP	8.97e-09	0.045	XLOC_011651	2RHet	861402	861402	862533	2.19e-11	0.0286	S2_DM
2L_22734137_SNP	5.55e-07	0.05	FBgn0262887	2L	22961737	22961737	22963456	9.38e-13	0.0286	S2_DM
2L_22734137_SNP	5.55e-07	0.05	FBgn0262887	2L	22961737	22961737	22963456	3.17e-06	0.0493	DOC4_DM
2L_22734137_SNP	4.02e-06	0.0495	XLOC_006268	2R	21910	21910	24748	9.38e-13	0.0286	S2_DM
2L_22734137_SNP	4.02e-06	0.0495	XLOC_006268	2R	21910	21910	24748	3.17e-06	0.0493	DOC4_DM
2L_22734137_SNP	1.27e-09	0.045	XLOC_011651	2RHet	861402	861402	862533	9.38e-13	0.0286	S2_DM
2L_22734137_SNP	1.27e-09	0.045	XLOC_011651	2RHet	861402	861402	862533	3.17e-06	0.0493	DOC4_DM
2L_22734169_SNP	8.4e-06	0.05	FBgn0262887	2L	22961737	22961737	22963456	2.02e-09	0.0286	S2_DM
2L_22734169_SNP	1.23e-07	0.045	XLOC_011651	2RHet	861402	861402	862533	2.02e-09	0.0286	S2_DM
2L_22735558_SNP	1.25e-06	0.045	XLOC_011651	2RHet	861402	861402	862533	3.12e-11	0.0286	S2_DM
2L_22735888_SNP	2.77e-08	0.045	XLOC_011651	2RHet	861402	861402	862533	1.83e-13	0.0286	S2_DM
2L_22736299_INS	2.82e-06	0.045	XLOC_011651	2RHet	861402	861402	862533	4.29e-11	0.0286	S2_DM
2L_22736363_SNP	1.53e-07	0.0497	XLOC_011663	2RHet	1111250	1111250	1139594	6.62e-06	0.0286	S2_DM
2L_22736363_SNP	1.44e-08	0.0441	XLOC_011704	2RHet	1921599	1921599	1923490	6.62e-06	0.0286	S2_DM
2L_22736363_SNP	5.32e-07	0.0494	XLOC_011705	2RHet	1924263	1924263	1926950	6.62e-06	0.0286	S2_DM
2L_22736363_SNP	1.56e-06	0.0482	XLOC_012081	2RHet	3151739	3149849	3151739	6.62e-06	0.0286	S2_DM
2L_22736458_SNP	6.63e-06	0.05	FBgn0262887	2L	22961737	22961737	22963456	3.34e-12	0.0286	S2_DM
2L_22736458_SNP	4.73e-08	0.045	XLOC_011651	2RHet	861402	861402	862533	3.34e-12	0.0286	S2_DM
2L_22736462_SNP	7.34e-06	0.05	FBgn0262887	2L	22961737	22961737	22963456	1.49e-09	0.0286	S2_DM
2L_22736462_SNP	1.51e-09	0.045	XLOC_011651	2RHet	861402	861402	862533	1.49e-09	0.0286	S2_DM
2L_22737653_DEL	4.14e-08	0.05	FBgn0262887	2L	22961737	22961737	22963456	1.16e-10	0.0286	S2_DM
2L_22737653_DEL	2.3e-06	0.045	XLOC_011651	2RHet	861402	861402	862533	1.16e-10	0.0286	S2_DM
2L_22737925_SNP	8.66e-06	0.0314	FBgn0023090	2L	21361216	21361216	21367288	3.81e-13	0.0286	S2_DM
2L_22737925_SNP	4.3e-08	0.045	XLOC_011651	2RHet	861402	861402	862533	3.81e-13	0.0286	S2_DM
2L_22738274_DEL	1.13e-07	0.045	XLOC_011651	2RHet	861402	861402	862533	2.07e-11	0.0286	S2_DM
2L_22738567_SNP	8.07e-06	0.0495	XLOC_006268	2R	21910	21910	24748	6.89e-12	0.0286	S2_DM
2L_22738567_SNP	5.69e-09	0.045	XLOC_011651	2RHet	861402	861402	862533	6.89e-12	0.0286	S2_DM
2L_22738690_SNP	7.37e-07	0.0314	FBgn0023090	2L	21361216	21361216	21367288	2.16e-12	0.0286	S2_DM
2L_22738690_SNP	3.13e-08	0.045	XLOC_011651	2RHet	861402	861402	862533	2.16e-12	0.0286	S2_DM
2L_22739083_INS	4.34e-06	0.045	XLOC_011651	2RHet	861402	861402	862533	1.88e-12	0.0286	S2_DM
2L_22739110_SNP	4.33e-06	0.0314	FBgn0023090	2L	21361216	21361216	21367288	4.62e-12	0.0286	S2_DM
2L_22739110_SNP	2.91e-08	0.045	XLOC_011651	2RHet	861402	861402	862533	4.62e-12	0.0286	S2_DM
2L_22739110_SNP	2.91e-08	0.0494	XLOC_011853	2RHet	624599	623448	624599	4.62e-12	0.0286	S2_DM
2L_22739503_SNP	1.13e-06	0.0314	FBgn0023090	2L	21361216	21361216	21367288	2.97e-12	0.0286	S2_DM
2L_22739503_SNP	3.79e-08	0.045	XLOC_011651	2RHet	861402	861402	862533	2.97e-12	0.0286	S2_DM
2L_22739503_SNP	4.2e-08	0.0494	XLOC_011853	2RHet	624599	623448	624599	2.97e-12	0.0286	S2_DM
2L_22740447_SNP	3.39e-06	0.0314	FBgn0023090	2L	21361216	21361216	21367288	3.24e-14	0.0286	S2_DM
2L_22740447_SNP	1.86e-06	0.05	FBgn0262887	2L	22961737	22961737	22963456	3.24e-14	0.0286	S2_DM
2L_22740447_SNP	1.78e-08	0.045	XLOC_011651	2RHet	861402	861402	862533	3.24e-14	0.0286	S2_DM
2L_22740447_SNP	3.98e-08	0.0494	XLOC_011853	2RHet	624599	623448	624599	3.24e-14	0.0286	S2_DM
2L_22740617_SNP	8.53e-06	0.05	FBgn0262887	2L	22961737	22961737	22963456	1.22e-13	0.0286	S2_DM
2L_22740617_SNP	4.03e-08	0.045	XLOC_011651	2RHet	861402	861402	862533	1.22e-13	0.0286	S2_DM
2L_22740617_SNP	7.21e-08	0.0494	XLOC_011853	2RHet	624599	623448	624599	1.22e-13	0.0286	S2_DM
2L_22741905_SNP	2.02e-06	0.0441	XLOC_011704	2RHet	1921599	1921599	1923490	7.58e-08	0.0286	S2_DM
2L_22742248_SNP	5.84e-07	0.05	FBgn0262887	2L	22961737	22961737	22963456	2.87e-10	0.0286	S2_DM
2L_22742248_SNP	4.38e-07	0.0494	XLOC_006253	2LHet	29448	25786	29448	2.87e-10	0.0286	S2_DM
2L_22742248_SNP	7.59e-06	0.0495	XLOC_006268	2R	21910	21910	24748	2.87e-10	0.0286	S2_DM
2L_22742248_SNP	4.34e-11	0.045	XLOC_011651	2RHet	861402	861402	862533	2.87e-10	0.0286	S2_DM
2L_22742248_SNP	1.51e-08	0.0494	XLOC_011853	2RHet	624599	623448	624599	2.87e-10	0.0286	S2_DM
2L_22742248_SNP	1.34e-06	0.0486	XLOC_011942	2RHet	1262608	1258487	1262608	2.87e-10	0.0286	S2_DM
2L_22742508_SNP	4.36e-08	0.045	XLOC_011651	2RHet	861402	861402	862533	2.09e-11	0.0286	S2_DM
2L_22742662_SNP	3.13e-08	0.0314	FBgn0023090	2L	21361216	21361216	21367288	3.34e-11	0.0286	S2_DM
2L_22742662_SNP	8.18e-07	0.045	XLOC_011651	2RHet	861402	861402	862533	3.34e-11	0.0286	S2_DM
2L_22742703_DEL	1.57e-07	0.0314	FBgn0023090	2L	21361216	21361216	21367288	1.84e-10	0.0286	S2_DM
2L_22742710_SNP	1.74e-06	0.045	XLOC_011651	2RHet	861402	861402	862533	2.49e-09	0.0286	S2_DM
2L_22743061_SNP	1.07e-08	0.0314	FBgn0023090	2L	21361216	21361216	21367288	3.37e-10	0.0286	S2_DM
2L_22743061_SNP	3.09e-06	0.045	XLOC_011651	2RHet	861402	861402	862533	3.37e-10	0.0286	S2_DM
2L_22743585_SNP	2.73e-07	0.0314	FBgn0023090	2L	21361216	21361216	21367288	8.75e-12	0.0286	S2_DM
2L_22743585_SNP	2.92e-06	0.045	XLOC_011651	2RHet	861402	861402	862533	8.75e-12	0.0286	S2_DM
2L_22743710_SNP	1.58e-06	0.05	FBgn0262887	2L	22961737	22961737	22963456	6.48e-09	0.0286	S2_DM
2L_22743846_SNP	7.21e-06	0.05	FBgn0262887	2L	22961737	22961737	22963456	5.34e-09	0.0286	S2_DM
2L_22743846_SNP	3.3e-08	0.045	XLOC_011651	2RHet	861402	861402	862533	5.34e-09	0.0286	S2_DM
2L_22743885_SNP	5.67e-06	0.0314	FBgn0023090	2L	21361216	21361216	21367288	5.71e-10	0.0286	S2_DM
2L_22743885_SNP	1.08e-06	0.05	FBgn0262887	2L	22961737	22961737	22963456	5.71e-10	0.0286	S2_DM
2L_22743885_SNP	9.14e-08	0.045	XLOC_011651	2RHet	861402	861402	862533	5.71e-10	0.0286	S2_DM
2L_22743948_SNP	4e-06	0.0314	FBgn0023090	2L	21361216	21361216	21367288	1.64e-10	0.0286	S2_DM
2L_22743948_SNP	2.18e-06	0.05	FBgn0262887	2L	22961737	22961737	22963456	1.64e-10	0.0286	S2_DM
2L_22743948_SNP	8.55e-08	0.045	XLOC_011651	2RHet	861402	861402	862533	1.64e-10	0.0286	S2_DM
2L_22745876_DEL	1.86e-07	0.045	XLOC_011651	2RHet	861402	861402	862533	6.04e-10	0.0286	S2_DM
2L_22746036_SNP	1.75e-06	0.0314	FBgn0023090	2L	21361216	21361216	21367288	2.7e-08	0.0286	S2_DM
2L_22746036_SNP	2.62e-07	0.045	XLOC_011651	2RHet	861402	861402	862533	2.7e-08	0.0286	S2_DM
2L_22746228_SNP	2.4e-07	0.05	FBgn0262887	2L	22961737	22961737	22963456	1.97e-06	0.0286	S2_DM
2L_22746228_SNP	2.16e-07	0.0495	XLOC_006268	2R	21910	21910	24748	1.97e-06	0.0286	S2_DM
2L_22746228_SNP	1.62e-10	0.045	XLOC_011651	2RHet	861402	861402	862533	1.97e-06	0.0286	S2_DM
2L_22746228_SNP	2.17e-06	0.0486	XLOC_011942	2RHet	1262608	1258487	1262608	1.97e-06	0.0286	S2_DM
2L_22751725_SNP	1.82e-06	0.05	FBgn0262887	2L	22961737	22961737	22963456	3.78e-08	0.0286	S2_DM
2L_22751725_SNP	1.55e-07	0.045	XLOC_011651	2RHet	861402	861402	862533	3.78e-08	0.0286	S2_DM
2L_22752689_SNP	2.99e-06	0.05	FBgn0262887	2L	22961737	22961737	22963456	2.21e-10	0.0286	S2_DM
2L_22752689_SNP	1.14e-06	0.045	XLOC_011651	2RHet	861402	861402	862533	2.21e-10	0.0286	S2_DM
2L_22763070_SNP	7.68e-06	0.0314	FBgn0023090	2L	21361216	21361216	21367288	4.64e-10	0.0286	S2_DM
2L_22763070_SNP	3.36e-07	0.05	FBgn0262887	2L	22961737	22961737	22963456	4.64e-10	0.0286	S2_DM
2L_22763070_SNP	1.3e-07	0.045	XLOC_011651	2RHet	861402	861402	862533	4.64e-10	0.0286	S2_DM
2L_22763151_SNP	6.73e-06	0.05	FBgn0262887	2L	22961737	22961737	22963456	1.84e-10	0.0286	S2_DM
2L_22763151_SNP	5.5e-08	0.045	XLOC_011651	2RHet	861402	861402	862533	1.84e-10	0.0286	S2_DM
2L_22763253_SNP	3.42e-06	0.05	FBgn0262887	2L	22961737	22961737	22963456	4.09e-09	0.0286	S2_DM
2L_22763253_SNP	7.59e-08	0.045	XLOC_011651	2RHet	861402	861402	862533	4.09e-09	0.0286	S2_DM
2L_22763433_SNP	5.78e-06	0.0314	FBgn0023090	2L	21361216	21361216	21367288	3.95e-10	0.0286	S2_DM
2L_22763433_SNP	5.21e-06	0.05	FBgn0262887	2L	22961737	22961737	22963456	3.95e-10	0.0286	S2_DM
2L_22763433_SNP	2.66e-09	0.045	XLOC_011651	2RHet	861402	861402	862533	3.95e-10	0.0286	S2_DM
2L_22763602_SNP	8.9e-07	0.05	FBgn0262887	2L	22961737	22961737	22963456	1.34e-09	0.0286	S2_DM
2L_22763602_SNP	5.97e-08	0.045	XLOC_011651	2RHet	861402	861402	862533	1.34e-09	0.0286	S2_DM
2L_22763765_SNP	1.22e-06	0.05	FBgn0262887	2L	22961737	22961737	22963456	1.46e-09	0.0286	S2_DM
2L_22763765_SNP	3.18e-08	0.045	XLOC_011651	2RHet	861402	861402	862533	1.46e-09	0.0286	S2_DM
2L_22764020_INS	2.03e-07	0.045	XLOC_011651	2RHet	861402	861402	862533	2.23e-08	0.0286	S2_DM
2L_22764153_SNP	5.27e-06	0.05	FBgn0262887	2L	22961737	22961737	22963456	6.72e-08	0.0286	S2_DM
2L_22764153_SNP	2.9e-06	0.045	XLOC_011651	2RHet	861402	861402	862533	6.72e-08	0.0286	S2_DM
2L_22764154_SNP	8.91e-06	0.045	XLOC_011651	2RHet	861402	861402	862533	6.33e-08	0.0286	S2_DM
2L_22803466_SNP	1.15e-09	0.0433	FBgn0058178	3LHet	1396811	1181140	1396811	1.45e-08	0.0473	ZAM_LTR
2L_22803466_SNP	1.32e-22	0.0245	XLOC_011759	2RHet	2857497	2857497	2858888	1.45e-08	0.0473	ZAM_LTR
2L_22803466_SNP	8.79e-27	0.0135	XLOC_015449	3L	23657890	23657890	23659968	1.45e-08	0.0473	ZAM_LTR
2L_22803466_SNP	7.86e-11	0	XLOC_019222	3LHet	1749422	1749422	1750103	1.45e-08	0.0473	ZAM_LTR
2L_22803466_SNP	1.4e-37	0.0187	XLOC_019257	3LHet	1922353	1922353	1922850	1.45e-08	0.0473	ZAM_LTR
2L_22803466_SNP	3.54e-11	0.015	XLOC_019267	3LHet	1985733	1985733	1986913	1.45e-08	0.0473	ZAM_LTR
2L_22803466_SNP	1.04e-12	0.015	XLOC_019318	3LHet	2424976	2424976	2425614	1.45e-08	0.0473	ZAM_LTR
2L_22803466_SNP	2.55e-06	0.0251	XLOC_019320	3LHet	2428375	2428375	2429045	1.45e-08	0.0473	ZAM_LTR
2L_22803466_SNP	7.75e-41	0.0134	XLOC_019322	3LHet	2434190	2434190	2434497	1.45e-08	0.0473	ZAM_LTR
2L_22803466_SNP	1.05e-13	0.0499	XLOC_019325	3LHet	2439069	2439069	2439696	1.45e-08	0.0473	ZAM_LTR
2L_22803466_SNP	3.16e-11	0.0167	XLOC_019330	3LHet	2456188	2456188	2463287	1.45e-08	0.0473	ZAM_LTR
2L_22803466_SNP	2.9e-34	0.0141	XLOC_019333	3LHet	2507193	2507193	2509087	1.45e-08	0.0473	ZAM_LTR
2L_22803466_SNP	1.98e-11	0.0493	XLOC_019465	3LHet	1265950	1260016	1265950	1.45e-08	0.0473	ZAM_LTR
2L_22803466_SNP	4.73e-13	0	XLOC_019468	3LHet	1276080	1268529	1276080	1.45e-08	0.0473	ZAM_LTR
2L_22803466_SNP	1.68e-14	0.0496	XLOC_019524	3LHet	2233178	2231234	2233178	1.45e-08	0.0473	ZAM_LTR
2L_22803466_SNP	1.8e-13	0.005	XLOC_026564	3RHet	1952553	1952553	1953347	1.45e-08	0.0473	ZAM_LTR
2L_22803513_SNP	1.02e-10	0.0433	FBgn0058178	3LHet	1396811	1181140	1396811	3.33e-08	0.0473	ZAM_LTR
2L_22803513_SNP	1.02e-10	0.0433	FBgn0058178	3LHet	1396811	1181140	1396811	1.11e-07	0.0472	Copia1-I_DM
2L_22803513_SNP	1.02e-10	0.0433	FBgn0058178	3LHet	1396811	1181140	1396811	6.14e-07	0.0488	Bica_I
2L_22803513_SNP	3.41e-25	0.0245	XLOC_011759	2RHet	2857497	2857497	2858888	6.14e-07	0.0488	Bica_I
2L_22803513_SNP	3.41e-25	0.0245	XLOC_011759	2RHet	2857497	2857497	2858888	1.11e-07	0.0472	Copia1-I_DM
2L_22803513_SNP	3.41e-25	0.0245	XLOC_011759	2RHet	2857497	2857497	2858888	3.33e-08	0.0473	ZAM_LTR
2L_22803513_SNP	1.1e-28	0.0135	XLOC_015449	3L	23657890	23657890	23659968	1.11e-07	0.0472	Copia1-I_DM
2L_22803513_SNP	1.1e-28	0.0135	XLOC_015449	3L	23657890	23657890	23659968	6.14e-07	0.0488	Bica_I
2L_22803513_SNP	1.1e-28	0.0135	XLOC_015449	3L	23657890	23657890	23659968	3.33e-08	0.0473	ZAM_LTR
2L_22803513_SNP	1.99e-12	0	XLOC_019222	3LHet	1749422	1749422	1750103	3.33e-08	0.0473	ZAM_LTR
2L_22803513_SNP	1.99e-12	0	XLOC_019222	3LHet	1749422	1749422	1750103	6.14e-07	0.0488	Bica_I
2L_22803513_SNP	1.99e-12	0	XLOC_019222	3LHet	1749422	1749422	1750103	1.11e-07	0.0472	Copia1-I_DM
2L_22803513_SNP	4.33e-10	0.01	XLOC_019223	3LHet	1752055	1752055	1752960	6.14e-07	0.0488	Bica_I
2L_22803513_SNP	4.33e-10	0.01	XLOC_019223	3LHet	1752055	1752055	1752960	1.11e-07	0.0472	Copia1-I_DM
2L_22803513_SNP	4.33e-10	0.01	XLOC_019223	3LHet	1752055	1752055	1752960	3.33e-08	0.0473	ZAM_LTR
2L_22803513_SNP	1.2e-37	0.0187	XLOC_019257	3LHet	1922353	1922353	1922850	1.11e-07	0.0472	Copia1-I_DM
2L_22803513_SNP	1.2e-37	0.0187	XLOC_019257	3LHet	1922353	1922353	1922850	6.14e-07	0.0488	Bica_I
2L_22803513_SNP	1.2e-37	0.0187	XLOC_019257	3LHet	1922353	1922353	1922850	3.33e-08	0.0473	ZAM_LTR
2L_22803513_SNP	1.49e-12	0.015	XLOC_019267	3LHet	1985733	1985733	1986913	6.14e-07	0.0488	Bica_I
2L_22803513_SNP	1.49e-12	0.015	XLOC_019267	3LHet	1985733	1985733	1986913	3.33e-08	0.0473	ZAM_LTR
2L_22803513_SNP	1.49e-12	0.015	XLOC_019267	3LHet	1985733	1985733	1986913	1.11e-07	0.0472	Copia1-I_DM
2L_22803513_SNP	4.05e-14	0.015	XLOC_019318	3LHet	2424976	2424976	2425614	3.33e-08	0.0473	ZAM_LTR
2L_22803513_SNP	4.05e-14	0.015	XLOC_019318	3LHet	2424976	2424976	2425614	1.11e-07	0.0472	Copia1-I_DM
2L_22803513_SNP	4.05e-14	0.015	XLOC_019318	3LHet	2424976	2424976	2425614	6.14e-07	0.0488	Bica_I
2L_22803513_SNP	7.78e-07	0.0251	XLOC_019320	3LHet	2428375	2428375	2429045	6.14e-07	0.0488	Bica_I
2L_22803513_SNP	7.78e-07	0.0251	XLOC_019320	3LHet	2428375	2428375	2429045	1.11e-07	0.0472	Copia1-I_DM
2L_22803513_SNP	7.78e-07	0.0251	XLOC_019320	3LHet	2428375	2428375	2429045	3.33e-08	0.0473	ZAM_LTR
2L_22803513_SNP	5.47e-45	0.0134	XLOC_019322	3LHet	2434190	2434190	2434497	6.14e-07	0.0488	Bica_I
2L_22803513_SNP	5.47e-45	0.0134	XLOC_019322	3LHet	2434190	2434190	2434497	1.11e-07	0.0472	Copia1-I_DM
2L_22803513_SNP	5.47e-45	0.0134	XLOC_019322	3LHet	2434190	2434190	2434497	3.33e-08	0.0473	ZAM_LTR
2L_22803513_SNP	1.08e-15	0.0499	XLOC_019325	3LHet	2439069	2439069	2439696	3.33e-08	0.0473	ZAM_LTR
2L_22803513_SNP	1.08e-15	0.0499	XLOC_019325	3LHet	2439069	2439069	2439696	1.11e-07	0.0472	Copia1-I_DM
2L_22803513_SNP	1.08e-15	0.0499	XLOC_019325	3LHet	2439069	2439069	2439696	6.14e-07	0.0488	Bica_I
2L_22803513_SNP	5.91e-12	0.0167	XLOC_019330	3LHet	2456188	2456188	2463287	6.14e-07	0.0488	Bica_I
2L_22803513_SNP	5.91e-12	0.0167	XLOC_019330	3LHet	2456188	2456188	2463287	3.33e-08	0.0473	ZAM_LTR
2L_22803513_SNP	5.91e-12	0.0167	XLOC_019330	3LHet	2456188	2456188	2463287	1.11e-07	0.0472	Copia1-I_DM
2L_22803513_SNP	8.83e-37	0.0141	XLOC_019333	3LHet	2507193	2507193	2509087	1.11e-07	0.0472	Copia1-I_DM
2L_22803513_SNP	8.83e-37	0.0141	XLOC_019333	3LHet	2507193	2507193	2509087	3.33e-08	0.0473	ZAM_LTR
2L_22803513_SNP	8.83e-37	0.0141	XLOC_019333	3LHet	2507193	2507193	2509087	6.14e-07	0.0488	Bica_I
2L_22803513_SNP	5.8e-13	0.0493	XLOC_019465	3LHet	1265950	1260016	1265950	6.14e-07	0.0488	Bica_I
2L_22803513_SNP	5.8e-13	0.0493	XLOC_019465	3LHet	1265950	1260016	1265950	1.11e-07	0.0472	Copia1-I_DM
2L_22803513_SNP	5.8e-13	0.0493	XLOC_019465	3LHet	1265950	1260016	1265950	3.33e-08	0.0473	ZAM_LTR
2L_22803513_SNP	1.75e-13	0	XLOC_019468	3LHet	1276080	1268529	1276080	3.33e-08	0.0473	ZAM_LTR
2L_22803513_SNP	1.75e-13	0	XLOC_019468	3LHet	1276080	1268529	1276080	6.14e-07	0.0488	Bica_I
2L_22803513_SNP	1.75e-13	0	XLOC_019468	3LHet	1276080	1268529	1276080	1.11e-07	0.0472	Copia1-I_DM
2L_22803513_SNP	1.45e-08	0.02	XLOC_019473	3LHet	1294834	1294134	1294834	6.14e-07	0.0488	Bica_I
2L_22803513_SNP	1.45e-08	0.02	XLOC_019473	3LHet	1294834	1294134	1294834	3.33e-08	0.0473	ZAM_LTR
2L_22803513_SNP	1.45e-08	0.02	XLOC_019473	3LHet	1294834	1294134	1294834	1.11e-07	0.0472	Copia1-I_DM
2L_22803513_SNP	3.08e-07	0.0367	XLOC_019474	3LHet	1297553	1294932	1297553	1.11e-07	0.0472	Copia1-I_DM
2L_22803513_SNP	3.08e-07	0.0367	XLOC_019474	3LHet	1297553	1294932	1297553	3.33e-08	0.0473	ZAM_LTR
2L_22803513_SNP	3.08e-07	0.0367	XLOC_019474	3LHet	1297553	1294932	1297553	6.14e-07	0.0488	Bica_I
2L_22803513_SNP	2.19e-16	0.0496	XLOC_019524	3LHet	2233178	2231234	2233178	6.14e-07	0.0488	Bica_I
2L_22803513_SNP	2.19e-16	0.0496	XLOC_019524	3LHet	2233178	2231234	2233178	3.33e-08	0.0473	ZAM_LTR
2L_22803513_SNP	2.19e-16	0.0496	XLOC_019524	3LHet	2233178	2231234	2233178	1.11e-07	0.0472	Copia1-I_DM
2L_22803513_SNP	5.7e-14	0.005	XLOC_026564	3RHet	1952553	1952553	1953347	3.33e-08	0.0473	ZAM_LTR
2L_22803513_SNP	5.7e-14	0.005	XLOC_026564	3RHet	1952553	1952553	1953347	1.11e-07	0.0472	Copia1-I_DM
2L_22803513_SNP	5.7e-14	0.005	XLOC_026564	3RHet	1952553	1952553	1953347	6.14e-07	0.0488	Bica_I
2L_22804372_SNP	6.16e-07	0.0314	FBgn0023090	2L	21361216	21361216	21367288	8.19e-10	0.0286	S2_DM
2L_22804372_SNP	2.14e-06	0.05	FBgn0262887	2L	22961737	22961737	22963456	8.19e-10	0.0286	S2_DM
2L_22804372_SNP	6.42e-09	0.045	XLOC_011651	2RHet	861402	861402	862533	8.19e-10	0.0286	S2_DM
2L_22805550_SNP	7.58e-07	0.0314	FBgn0023090	2L	21361216	21361216	21367288	7.24e-08	0.0286	S2_DM
2L_22805550_SNP	1.92e-06	0.045	XLOC_011651	2RHet	861402	861402	862533	7.24e-08	0.0286	S2_DM
2L_22815915_SNP	8.69e-08	0.0314	FBgn0023090	2L	21361216	21361216	21367288	2.83e-10	0.0286	S2_DM
2L_22815915_SNP	1.44e-06	0.05	FBgn0262887	2L	22961737	22961737	22963456	2.83e-10	0.0286	S2_DM
2L_22815915_SNP	9.13e-07	0.045	XLOC_011651	2RHet	861402	861402	862533	2.83e-10	0.0286	S2_DM
2L_22816165_SNP	5.35e-08	0.0314	FBgn0023090	2L	21361216	21361216	21367288	1.53e-10	0.0286	S2_DM
2L_22816165_SNP	5.73e-06	0.05	FBgn0262887	2L	22961737	22961737	22963456	1.53e-10	0.0286	S2_DM
2L_22816165_SNP	2.28e-06	0.045	XLOC_011651	2RHet	861402	861402	862533	1.53e-10	0.0286	S2_DM
2L_22818097_SNP	3.5e-08	0.0314	FBgn0023090	2L	21361216	21361216	21367288	8.06e-11	0.0286	S2_DM
2L_22818097_SNP	1.23e-06	0.05	FBgn0262887	2L	22961737	22961737	22963456	8.06e-11	0.0286	S2_DM
2L_22818097_SNP	9.47e-07	0.045	XLOC_011651	2RHet	861402	861402	862533	8.06e-11	0.0286	S2_DM
2L_22818241_SNP	2.05e-08	0.0314	FBgn0023090	2L	21361216	21361216	21367288	7.87e-11	0.0286	S2_DM
2L_22818241_SNP	8.25e-07	0.05	FBgn0262887	2L	22961737	22961737	22963456	7.87e-11	0.0286	S2_DM
2L_22818241_SNP	1.81e-07	0.045	XLOC_011651	2RHet	861402	861402	862533	7.87e-11	0.0286	S2_DM
2L_22819033_SNP	1.66e-06	0.0314	FBgn0023090	2L	21361216	21361216	21367288	3.71e-08	0.0286	S2_DM
2L_22819033_SNP	2.17e-07	0.045	XLOC_011651	2RHet	861402	861402	862533	3.71e-08	0.0286	S2_DM
2L_22819520_SNP	5.81e-09	0.0314	FBgn0023090	2L	21361216	21361216	21367288	2.71e-08	0.0286	S2_DM
2L_22819520_SNP	1.88e-06	0.045	XLOC_011651	2RHet	861402	861402	862533	2.71e-08	0.0286	S2_DM
2L_22819749_SNP	2.26e-07	0.0314	FBgn0023090	2L	21361216	21361216	21367288	5.86e-11	0.0286	S2_DM
2L_22819749_SNP	2.96e-06	0.05	FBgn0262887	2L	22961737	22961737	22963456	5.86e-11	0.0286	S2_DM
2L_22819749_SNP	3.77e-06	0.045	XLOC_011651	2RHet	861402	861402	862533	5.86e-11	0.0286	S2_DM
2L_22820040_SNP	7.86e-06	0.0314	FBgn0023090	2L	21361216	21361216	21367288	3.9e-09	0.0286	S2_DM
2L_22820125_SNP	3.32e-06	0.0314	FBgn0023090	2L	21361216	21361216	21367288	1.11e-11	0.0286	S2_DM
2L_22821663_SNP	2.7e-07	0.0314	FBgn0023090	2L	21361216	21361216	21367288	3.19e-09	0.0286	S2_DM
2L_22821663_SNP	6.92e-06	0.05	FBgn0262887	2L	22961737	22961737	22963456	3.19e-09	0.0286	S2_DM
2L_22822457_SNP	5.06e-06	0.0314	FBgn0023090	2L	21361216	21361216	21367288	2.19e-12	0.0286	S2_DM
2L_22822457_SNP	9.46e-09	0.045	XLOC_011651	2RHet	861402	861402	862533	2.19e-12	0.0286	S2_DM
2L_22823159_SNP	2.32e-06	0.0314	FBgn0023090	2L	21361216	21361216	21367288	4e-09	0.0286	S2_DM
2L_22823159_SNP	8.1e-06	0.05	FBgn0262887	2L	22961737	22961737	22963456	4e-09	0.0286	S2_DM
2L_22823159_SNP	2.96e-06	0.045	XLOC_011651	2RHet	861402	861402	862533	4e-09	0.0286	S2_DM
2L_22831955_SNP	6.55e-07	0.0314	FBgn0023090	2L	21361216	21361216	21367288	1.06e-09	0.0286	S2_DM
2L_22831955_SNP	6.68e-07	0.05	FBgn0262887	2L	22961737	22961737	22963456	1.06e-09	0.0286	S2_DM
2L_22831955_SNP	6.23e-06	0.045	XLOC_011651	2RHet	861402	861402	862533	1.06e-09	0.0286	S2_DM
2L_22834173_SNP	4.69e-07	0.0314	FBgn0023090	2L	21361216	21361216	21367288	1.79e-11	0.0286	S2_DM
2L_22834173_SNP	6.35e-06	0.05	FBgn0262887	2L	22961737	22961737	22963456	1.79e-11	0.0286	S2_DM
2L_22834173_SNP	4.11e-06	0.045	XLOC_011651	2RHet	861402	861402	862533	1.79e-11	0.0286	S2_DM
2L_22834268_SNP	1.97e-07	0.0314	FBgn0023090	2L	21361216	21361216	21367288	1.32e-11	0.0286	S2_DM
2L_22834268_SNP	1.79e-06	0.05	FBgn0262887	2L	22961737	22961737	22963456	1.32e-11	0.0286	S2_DM
2L_22834268_SNP	1.19e-06	0.045	XLOC_011651	2RHet	861402	861402	862533	1.32e-11	0.0286	S2_DM
2L_22834728_SNP	1.51e-06	0.0314	FBgn0023090	2L	21361216	21361216	21367288	6.68e-11	0.0286	S2_DM
2L_22834728_SNP	1.05e-06	0.05	FBgn0262887	2L	22961737	22961737	22963456	6.68e-11	0.0286	S2_DM
2L_22834728_SNP	2.95e-06	0.045	XLOC_011651	2RHet	861402	861402	862533	6.68e-11	0.0286	S2_DM
2L_22835224_DEL	2.87e-06	0.0314	FBgn0023090	2L	21361216	21361216	21367288	8.28e-12	0.0286	S2_DM
2L_22835224_DEL	2.43e-06	0.05	FBgn0262887	2L	22961737	22961737	22963456	8.28e-12	0.0286	S2_DM
2L_22835237_DEL	1.55e-06	0.0314	FBgn0023090	2L	21361216	21361216	21367288	6.91e-12	0.0286	S2_DM
2L_22835237_DEL	2.27e-06	0.05	FBgn0262887	2L	22961737	22961737	22963456	6.91e-12	0.0286	S2_DM
2L_22844267_SNP	5.9e-06	0.0314	FBgn0023090	2L	21361216	21361216	21367288	1.29e-09	0.0286	S2_DM
2L_22844340_SNP	1.2e-06	0.0314	FBgn0023090	2L	21361216	21361216	21367288	4.04e-10	0.0286	S2_DM
2L_22844340_SNP	7.74e-06	0.05	FBgn0262887	2L	22961737	22961737	22963456	4.04e-10	0.0286	S2_DM
2L_22844376_SNP	2.93e-07	0.0314	FBgn0023090	2L	21361216	21361216	21367288	1.35e-10	0.0286	S2_DM
2L_22844376_SNP	2.75e-06	0.05	FBgn0262887	2L	22961737	22961737	22963456	1.35e-10	0.0286	S2_DM
2L_22844377_SNP	1.54e-06	0.0314	FBgn0023090	2L	21361216	21361216	21367288	2.55e-10	0.0286	S2_DM
2L_22844397_SNP	1.17e-06	0.0314	FBgn0023090	2L	21361216	21361216	21367288	3.11e-10	0.0286	S2_DM
2L_22844397_SNP	4.79e-06	0.05	FBgn0262887	2L	22961737	22961737	22963456	3.11e-10	0.0286	S2_DM
2L_22844476_SNP	9.74e-06	0.0314	FBgn0023090	2L	21361216	21361216	21367288	1.68e-10	0.0286	S2_DM
2L_22844476_SNP	8.52e-06	0.05	FBgn0262887	2L	22961737	22961737	22963456	1.68e-10	0.0286	S2_DM
2L_22844514_DEL	3.06e-06	0.0499	XLOC_011977	2RHet	1591609	1590552	1591609	2.1e-09	0.0286	S2_DM
2L_22844553_SNP	5.88e-06	0.05	FBgn0262887	2L	22961737	22961737	22963456	1.71e-10	0.0286	S2_DM
2L_22844774_SNP	3e-08	0.0314	FBgn0023090	2L	21361216	21361216	21367288	1.88e-09	0.0286	S2_DM
2L_22844774_SNP	6.67e-06	0.05	FBgn0262887	2L	22961737	22961737	22963456	1.88e-09	0.0286	S2_DM
2L_22844856_SNP	1.64e-06	0.0314	FBgn0023090	2L	21361216	21361216	21367288	2.06e-09	0.0286	S2_DM
2L_22844856_SNP	2.73e-06	0.05	FBgn0262887	2L	22961737	22961737	22963456	2.06e-09	0.0286	S2_DM
2L_22844896_SNP	2.01e-06	0.0314	FBgn0023090	2L	21361216	21361216	21367288	6.86e-11	0.0286	S2_DM
2L_22844896_SNP	1.09e-06	0.05	FBgn0262887	2L	22961737	22961737	22963456	6.86e-11	0.0286	S2_DM
2L_22852962_SNP	1.69e-07	0.0441	XLOC_011704	2RHet	1921599	1921599	1923490	6.43e-06	0.0286	S2_DM
2L_22852962_SNP	1.44e-06	0.0494	XLOC_011705	2RHet	1924263	1924263	1926950	6.43e-06	0.0286	S2_DM
2L_22852962_SNP	2.47e-06	0.0482	XLOC_011789	2RHet	3215567	3215567	3217239	6.43e-06	0.0286	S2_DM
2L_22852962_SNP	1.31e-07	0.0482	XLOC_012081	2RHet	3151739	3149849	3151739	6.43e-06	0.0286	S2_DM
2L_22853273_SNP	3.28e-07	0.045	FBgn0046706	2RHet	3199376	3199376	3234607	2.05e-08	0.0286	S2_DM
2L_22853273_SNP	2.35e-06	0.0441	XLOC_011704	2RHet	1921599	1921599	1923490	2.05e-08	0.0286	S2_DM
2L_22857246_SNP	3.98e-07	0.045	FBgn0046706	2RHet	3199376	3199376	3234607	1.39e-08	0.0286	S2_DM
2L_22859151_SNP	1.71e-06	0.0314	FBgn0023090	2L	21361216	21361216	21367288	3.68e-09	0.0286	S2_DM
2L_22859151_SNP	6.42e-06	0.045	XLOC_011651	2RHet	861402	861402	862533	3.68e-09	0.0286	S2_DM
2L_22859411_SNP	2.58e-06	0.0314	FBgn0023090	2L	21361216	21361216	21367288	5.78e-10	0.0286	S2_DM
2L_22859411_SNP	2.86e-06	0.05	FBgn0262887	2L	22961737	22961737	22963456	5.78e-10	0.0286	S2_DM
2L_22859470_SNP	6.88e-07	0.0314	FBgn0023090	2L	21361216	21361216	21367288	2.37e-09	0.0286	S2_DM
2L_22859470_SNP	3.02e-06	0.05	FBgn0262887	2L	22961737	22961737	22963456	2.37e-09	0.0286	S2_DM
2L_22861153_SNP	3.1e-06	0.0314	FBgn0023090	2L	21361216	21361216	21367288	3.11e-09	0.0286	S2_DM
2L_22861153_SNP	8.78e-07	0.05	FBgn0262887	2L	22961737	22961737	22963456	3.11e-09	0.0286	S2_DM
2L_22861153_SNP	2.46e-06	0.045	XLOC_011651	2RHet	861402	861402	862533	3.11e-09	0.0286	S2_DM
2L_22862555_INS	3.16e-06	0.0314	FBgn0023090	2L	21361216	21361216	21367288	4.39e-11	0.0286	S2_DM
2L_22862555_INS	3.71e-06	0.05	FBgn0262887	2L	22961737	22961737	22963456	4.39e-11	0.0286	S2_DM
2L_22862599_DEL	6.86e-06	0.0314	FBgn0023090	2L	21361216	21361216	21367288	2.53e-09	0.0286	S2_DM
2L_22863883_SNP	2.58e-06	0.0314	FBgn0023090	2L	21361216	21361216	21367288	1.16e-09	0.0286	S2_DM
2L_22865883_SNP	1.29e-08	0.05	FBgn0262887	2L	22961737	22961737	22963456	5.99e-06	0.0286	S2_DM
2L_22865883_SNP	2.69e-08	0.045	XLOC_011651	2RHet	861402	861402	862533	5.99e-06	0.0286	S2_DM
2L_22867019_SNP	6.21e-07	0.0314	FBgn0023090	2L	21361216	21361216	21367288	2.96e-10	0.0286	S2_DM
2L_22867019_SNP	5.51e-06	0.045	XLOC_011651	2RHet	861402	861402	862533	2.96e-10	0.0286	S2_DM
2L_22867904_SNP	2.15e-07	0.05	FBgn0262887	2L	22961737	22961737	22963456	2.35e-10	0.0286	S2_DM
2L_22869682_SNP	1.76e-06	0.05	FBgn0262887	2L	22961737	22961737	22963456	3.94e-08	0.0286	S2_DM
2L_22870068_SNP	1.16e-09	0.05	FBgn0262887	2L	22961737	22961737	22963456	2.61e-06	0.0286	S2_DM
2L_22870068_SNP	1.78e-09	0.045	XLOC_011651	2RHet	861402	861402	862533	2.61e-06	0.0286	S2_DM
2L_22872496_SNP	6.47e-06	0.0491	FBgn0032997	2R	506535	506535	508338	4.52e-09	0.0286	S2_DM
2L_22872496_SNP	5.64e-06	0.05	FBgn0262887	2L	22961737	22961737	22963456	4.52e-09	0.0286	S2_DM
2L_22872496_SNP	2.23e-07	0.045	XLOC_011651	2RHet	861402	861402	862533	4.52e-09	0.0286	S2_DM
2L_22874038_DEL	1.42e-06	0.05	FBgn0262887	2L	22961737	22961737	22963456	1.6e-06	0.0286	S2_DM
2L_22875354_SNP	6.56e-07	0.05	FBgn0262887	2L	22961737	22961737	22963456	1.44e-08	0.0286	S2_DM
2L_22875793_SNP	1.73e-06	0.05	FBgn0262887	2L	22961737	22961737	22963456	5.6e-06	0.0286	S2_DM
2L_22876079_SNP	3.88e-07	0.05	FBgn0262887	2L	22961737	22961737	22963456	6.51e-07	0.0286	S2_DM
2L_22876477_SNP	1.6e-06	0.05	FBgn0262887	2L	22961737	22961737	22963456	6.6e-09	0.0286	S2_DM
2L_22876725_DEL	2.03e-09	0.05	FBgn0262887	2L	22961737	22961737	22963456	4.05e-06	0.0286	S2_DM
2L_22876725_DEL	5.69e-08	0.045	XLOC_011651	2RHet	861402	861402	862533	4.05e-06	0.0286	S2_DM
2L_22879492_INS	2.39e-07	0.045	FBgn0046706	2RHet	3199376	3199376	3234607	6.02e-06	0.0286	S2_DM
2L_22879492_INS	2.39e-07	0.045	FBgn0046706	2RHet	3199376	3199376	3234607	3.88e-06	0.0493	DOC4_DM
2L_22879492_INS	1.63e-09	0.0441	XLOC_011704	2RHet	1921599	1921599	1923490	6.02e-06	0.0286	S2_DM
2L_22879492_INS	1.63e-09	0.0441	XLOC_011704	2RHet	1921599	1921599	1923490	3.88e-06	0.0493	DOC4_DM
2L_22879492_INS	2.96e-08	0.0494	XLOC_011705	2RHet	1924263	1924263	1926950	6.02e-06	0.0286	S2_DM
2L_22879492_INS	2.96e-08	0.0494	XLOC_011705	2RHet	1924263	1924263	1926950	3.88e-06	0.0493	DOC4_DM
2L_22879492_INS	2.11e-06	0.0482	XLOC_011789	2RHet	3215567	3215567	3217239	3.88e-06	0.0493	DOC4_DM
2L_22879492_INS	2.11e-06	0.0482	XLOC_011789	2RHet	3215567	3215567	3217239	6.02e-06	0.0286	S2_DM
2L_22879492_INS	1.55e-06	0.0482	XLOC_012081	2RHet	3151739	3149849	3151739	3.88e-06	0.0493	DOC4_DM
2L_22879492_INS	1.55e-06	0.0482	XLOC_012081	2RHet	3151739	3149849	3151739	6.02e-06	0.0286	S2_DM
2L_22880672_SNP	4.41e-08	0.05	FBgn0262887	2L	22961737	22961737	22963456	1.02e-06	0.0286	S2_DM
2L_22880672_SNP	1.46e-07	0.045	XLOC_011651	2RHet	861402	861402	862533	1.02e-06	0.0286	S2_DM
2L_22886176_SNP	4.46e-08	0.05	FBgn0262887	2L	22961737	22961737	22963456	1.42e-06	0.0286	S2_DM
2L_22886176_SNP	7.68e-10	0.045	XLOC_011651	2RHet	861402	861402	862533	1.42e-06	0.0286	S2_DM
2L_22888777_SNP	3.69e-06	0.05	FBgn0262887	2L	22961737	22961737	22963456	1.56e-06	0.0286	S2_DM
2L_22888777_SNP	3.11e-07	0.045	XLOC_011651	2RHet	861402	861402	862533	1.56e-06	0.0286	S2_DM
2L_22889164_SNP	1.17e-06	0.05	FBgn0262887	2L	22961737	22961737	22963456	8.36e-06	0.0286	S2_DM
2L_22889164_SNP	9.83e-06	0.0495	XLOC_006268	2R	21910	21910	24748	8.36e-06	0.0286	S2_DM
2L_22889164_SNP	1.6e-08	0.045	XLOC_011651	2RHet	861402	861402	862533	8.36e-06	0.0286	S2_DM
2L_22891681_SNP	8.24e-07	0.05	FBgn0262887	2L	22961737	22961737	22963456	1.77e-06	0.0286	S2_DM
2L_22891681_SNP	6.79e-09	0.045	XLOC_011651	2RHet	861402	861402	862533	1.77e-06	0.0286	S2_DM
2L_22892064_SNP	1.67e-06	0.05	FBgn0262887	2L	22961737	22961737	22963456	1.04e-07	0.0286	S2_DM
2L_22892064_SNP	2.43e-06	0.045	XLOC_011651	2RHet	861402	861402	862533	1.04e-07	0.0286	S2_DM
2L_22892066_INS	2.81e-06	0.05	FBgn0262887	2L	22961737	22961737	22963456	8.88e-07	0.0286	S2_DM
2L_22892066_INS	8.76e-07	0.045	XLOC_011651	2RHet	861402	861402	862533	8.88e-07	0.0286	S2_DM
2L_22892069_SNP	1.21e-07	0.05	FBgn0262887	2L	22961737	22961737	22963456	9.54e-07	0.0286	S2_DM
2L_22892069_SNP	1.11e-07	0.045	XLOC_011651	2RHet	861402	861402	862533	9.54e-07	0.0286	S2_DM
2L_22892513_SNP	7.1e-08	0.05	FBgn0262887	2L	22961737	22961737	22963456	1.51e-06	0.0286	S2_DM
2L_22892513_SNP	5.47e-08	0.045	XLOC_011651	2RHet	861402	861402	862533	1.51e-06	0.0286	S2_DM
2L_22896324_SNP	1.86e-07	0.05	FBgn0262887	2L	22961737	22961737	22963456	1.41e-06	0.0286	S2_DM
2L_22896324_SNP	2.74e-06	0.0495	XLOC_006268	2R	21910	21910	24748	1.41e-06	0.0286	S2_DM
2L_22896324_SNP	5.89e-09	0.045	XLOC_011651	2RHet	861402	861402	862533	1.41e-06	0.0286	S2_DM
2L_22896441_SNP	8.08e-07	0.05	FBgn0262887	2L	22961737	22961737	22963456	2.8e-06	0.0286	S2_DM
2L_22898894_SNP	8.33e-08	0.045	FBgn0046706	2RHet	3199376	3199376	3234607	2.33e-06	0.0286	S2_DM
2L_22898894_SNP	7.81e-07	0.0497	XLOC_011663	2RHet	1111250	1111250	1139594	2.33e-06	0.0286	S2_DM
2L_22898894_SNP	7.42e-09	0.0441	XLOC_011704	2RHet	1921599	1921599	1923490	2.33e-06	0.0286	S2_DM
2L_22898894_SNP	9.23e-08	0.0494	XLOC_011705	2RHet	1924263	1924263	1926950	2.33e-06	0.0286	S2_DM
2L_22898894_SNP	2.09e-07	0.0482	XLOC_011789	2RHet	3215567	3215567	3217239	2.33e-06	0.0286	S2_DM
2L_22898894_SNP	2.02e-07	0.0482	XLOC_012081	2RHet	3151739	3149849	3151739	2.33e-06	0.0286	S2_DM
2L_22898944_SNP	1.89e-07	0.045	FBgn0046706	2RHet	3199376	3199376	3234607	9.75e-06	0.0286	S2_DM
2L_22898944_SNP	9.49e-07	0.0497	XLOC_011663	2RHet	1111250	1111250	1139594	9.75e-06	0.0286	S2_DM
2L_22898944_SNP	1.57e-09	0.0441	XLOC_011704	2RHet	1921599	1921599	1923490	9.75e-06	0.0286	S2_DM
2L_22898944_SNP	7.68e-08	0.0494	XLOC_011705	2RHet	1924263	1924263	1926950	9.75e-06	0.0286	S2_DM
2L_22898944_SNP	1.94e-07	0.0482	XLOC_011789	2RHet	3215567	3215567	3217239	9.75e-06	0.0286	S2_DM
2L_22898944_SNP	1.06e-08	0.0482	XLOC_012081	2RHet	3151739	3149849	3151739	9.75e-06	0.0286	S2_DM
2L_22899161_SNP	1.63e-07	0.05	FBgn0262887	2L	22961737	22961737	22963456	5.35e-06	0.0286	S2_DM
2L_22899161_SNP	1.88e-06	0.0495	XLOC_006268	2R	21910	21910	24748	5.35e-06	0.0286	S2_DM
2L_22899161_SNP	2.61e-08	0.045	XLOC_011651	2RHet	861402	861402	862533	5.35e-06	0.0286	S2_DM
2L_22902168_SNP	1.92e-06	0.0482	XLOC_012081	2RHet	3151739	3149849	3151739	4.75e-06	0.0286	S2_DM
2L_22902513_SNP	1.41e-07	0.045	FBgn0046706	2RHet	3199376	3199376	3234607	1.63e-09	0.0493	DOC4_DM
2L_22902513_SNP	1.32e-06	0.0499	XLOC_008884	2R	264145	262676	264145	1.63e-09	0.0493	DOC4_DM
2L_22902513_SNP	1.81e-08	0.0441	XLOC_011704	2RHet	1921599	1921599	1923490	1.63e-09	0.0493	DOC4_DM
2L_22902513_SNP	1.16e-06	0.0482	XLOC_011789	2RHet	3215567	3215567	3217239	1.63e-09	0.0493	DOC4_DM
2L_22902513_SNP	2.79e-08	0.0482	XLOC_012081	2RHet	3151739	3149849	3151739	1.63e-09	0.0493	DOC4_DM
2L_22902584_SNP	4.59e-07	0.045	FBgn0046706	2RHet	3199376	3199376	3234607	1.81e-08	0.0493	DOC4_DM
2L_22902584_SNP	1.67e-06	0.0499	XLOC_008884	2R	264145	262676	264145	1.81e-08	0.0493	DOC4_DM
2L_22902584_SNP	4.87e-08	0.0441	XLOC_011704	2RHet	1921599	1921599	1923490	1.81e-08	0.0493	DOC4_DM
2L_22902584_SNP	1.25e-06	0.0482	XLOC_011789	2RHet	3215567	3215567	3217239	1.81e-08	0.0493	DOC4_DM
2L_22902584_SNP	3.26e-09	0.0482	XLOC_012081	2RHet	3151739	3149849	3151739	1.81e-08	0.0493	DOC4_DM
2L_22903433_SNP	6.45e-07	0.0499	XLOC_008884	2R	264145	262676	264145	3.4e-06	0.0493	DOC4_DM
2L_22903433_SNP	4.96e-07	0.0441	XLOC_011704	2RHet	1921599	1921599	1923490	3.4e-06	0.0493	DOC4_DM
2L_22903433_SNP	3.78e-06	0.0494	XLOC_011705	2RHet	1924263	1924263	1926950	3.4e-06	0.0493	DOC4_DM
2L_22903519_SNP	2.92e-07	0.0441	XLOC_011704	2RHet	1921599	1921599	1923490	7.77e-07	0.0493	DOC4_DM
2L_22903555_SNP	1.24e-07	0.0441	XLOC_011704	2RHet	1921599	1921599	1923490	8.1e-07	0.0493	DOC4_DM
2L_22903559_SNP	3.28e-06	0.0499	XLOC_008884	2R	264145	262676	264145	8.94e-07	0.0493	DOC4_DM
2L_22903559_SNP	1.18e-07	0.0441	XLOC_011704	2RHet	1921599	1921599	1923490	8.94e-07	0.0493	DOC4_DM
2L_22904177_SNP	7.81e-13	0.045	FBgn0046706	2RHet	3199376	3199376	3234607	3.29e-06	0.0493	DOC4_DM
2L_22904177_SNP	4.69e-11	0.0441	XLOC_011704	2RHet	1921599	1921599	1923490	3.29e-06	0.0493	DOC4_DM
2L_22904177_SNP	8.12e-08	0.0494	XLOC_011705	2RHet	1924263	1924263	1926950	3.29e-06	0.0493	DOC4_DM
2L_22904177_SNP	1.13e-11	0.0482	XLOC_011789	2RHet	3215567	3215567	3217239	3.29e-06	0.0493	DOC4_DM
2L_22904177_SNP	1.17e-08	0.0499	XLOC_011977	2RHet	1591609	1590552	1591609	3.29e-06	0.0493	DOC4_DM
2L_22904177_SNP	1.61e-09	0.0482	XLOC_012081	2RHet	3151739	3149849	3151739	3.29e-06	0.0493	DOC4_DM
2L_22904698_DEL	5.63e-14	0.045	FBgn0046706	2RHet	3199376	3199376	3234607	5.36e-08	0.0493	DOC4_DM
2L_22904698_DEL	7.09e-08	0.0499	XLOC_008884	2R	264145	262676	264145	5.36e-08	0.0493	DOC4_DM
2L_22904698_DEL	1.72e-11	0.0441	XLOC_011704	2RHet	1921599	1921599	1923490	5.36e-08	0.0493	DOC4_DM
2L_22904698_DEL	5.34e-10	0.0494	XLOC_011705	2RHet	1924263	1924263	1926950	5.36e-08	0.0493	DOC4_DM
2L_22904698_DEL	6.81e-12	0.0482	XLOC_011789	2RHet	3215567	3215567	3217239	5.36e-08	0.0493	DOC4_DM
2L_22904698_DEL	5.04e-08	0.0499	XLOC_011977	2RHet	1591609	1590552	1591609	5.36e-08	0.0493	DOC4_DM
2L_22904698_DEL	8.76e-11	0.0482	XLOC_012081	2RHet	3151739	3149849	3151739	5.36e-08	0.0493	DOC4_DM
2L_22905374_SNP	9.48e-08	0.0441	XLOC_011704	2RHet	1921599	1921599	1923490	8.11e-06	0.0286	S2_DM
2L_22905374_SNP	3.53e-06	0.0494	XLOC_011705	2RHet	1924263	1924263	1926950	8.11e-06	0.0286	S2_DM
2L_22905374_SNP	1.14e-06	0.0482	XLOC_011789	2RHet	3215567	3215567	3217239	8.11e-06	0.0286	S2_DM
2L_22905374_SNP	1.36e-07	0.0482	XLOC_012081	2RHet	3151739	3149849	3151739	8.11e-06	0.0286	S2_DM
2L_22909746_SNP	1.11e-07	0.045	FBgn0046706	2RHet	3199376	3199376	3234607	1.46e-07	0.0286	S2_DM
2L_22909746_SNP	5.56e-08	0.0441	XLOC_011704	2RHet	1921599	1921599	1923490	1.46e-07	0.0286	S2_DM
2L_22909746_SNP	3.44e-06	0.0482	XLOC_011789	2RHet	3215567	3215567	3217239	1.46e-07	0.0286	S2_DM
2L_22909746_SNP	2.64e-06	0.0482	XLOC_012081	2RHet	3151739	3149849	3151739	1.46e-07	0.0286	S2_DM
2L_22910723_SNP	2.59e-06	0.05	FBgn0262887	2L	22961737	22961737	22963456	9.7e-06	0.0286	S2_DM
2L_22910723_SNP	5.91e-09	0.045	XLOC_011651	2RHet	861402	861402	862533	9.7e-06	0.0286	S2_DM
2L_22910988_SNP	9.66e-06	0.045	XLOC_011651	2RHet	861402	861402	862533	6.18e-06	0.0286	S2_DM
2L_22917370_DEL	5.95e-10	0.0499	FBgn0267986	U	3533522	3533522	3534680	1.33e-06	0.0286	S2_DM
2L_22917433_SNP	3.88e-06	0.05	FBgn0262887	2L	22961737	22961737	22963456	2.45e-07	0.0286	S2_DM
2L_22917433_SNP	1.9e-07	0.045	XLOC_011651	2RHet	861402	861402	862533	2.45e-07	0.0286	S2_DM
2L_22921773_INS	4.79e-08	0.05	FBgn0262887	2L	22961737	22961737	22963456	1e-07	0.0286	S2_DM
2L_22921773_INS	1e-08	0.0499	FBgn0267986	U	3533522	3533522	3534680	1e-07	0.0286	S2_DM
2L_22923864_SNP	7.67e-07	0.05	FBgn0262887	2L	22961737	22961737	22963456	1.11e-06	0.0286	S2_DM
2L_22923864_SNP	7.46e-06	0.0495	XLOC_006268	2R	21910	21910	24748	1.11e-06	0.0286	S2_DM
2L_22923864_SNP	8.94e-08	0.045	XLOC_011651	2RHet	861402	861402	862533	1.11e-06	0.0286	S2_DM
2L_22923889_SNP	1.08e-06	0.05	FBgn0262887	2L	22961737	22961737	22963456	1.05e-07	0.0286	S2_DM
2L_22923889_SNP	5.39e-06	0.0495	XLOC_006268	2R	21910	21910	24748	1.05e-07	0.0286	S2_DM
2L_22923889_SNP	3.43e-08	0.045	XLOC_011651	2RHet	861402	861402	862533	1.05e-07	0.0286	S2_DM
2L_22924200_SNP	1.07e-07	0.05	FBgn0262887	2L	22961737	22961737	22963456	8.64e-07	0.0286	S2_DM
2L_22924200_SNP	1.25e-09	0.0499	FBgn0267986	U	3533522	3533522	3534680	8.64e-07	0.0286	S2_DM
2L_22924200_SNP	1.49e-06	0.045	XLOC_011651	2RHet	861402	861402	862533	8.64e-07	0.0286	S2_DM
2L_22924958_SNP	1.97e-08	0.045	FBgn0046706	2RHet	3199376	3199376	3234607	5.04e-06	0.0286	S2_DM
2L_22924958_SNP	2.73e-06	0.0499	XLOC_008884	2R	264145	262676	264145	5.04e-06	0.0286	S2_DM
2L_22924958_SNP	7.12e-12	0.0441	XLOC_011704	2RHet	1921599	1921599	1923490	5.04e-06	0.0286	S2_DM
2L_22924958_SNP	1.86e-11	0.0494	XLOC_011705	2RHet	1924263	1924263	1926950	5.04e-06	0.0286	S2_DM
2L_22924958_SNP	1.65e-08	0.0482	XLOC_011789	2RHet	3215567	3215567	3217239	5.04e-06	0.0286	S2_DM
2L_22924958_SNP	1.52e-10	0.0499	XLOC_011977	2RHet	1591609	1590552	1591609	5.04e-06	0.0286	S2_DM
2L_22924958_SNP	3.82e-10	0.0482	XLOC_012081	2RHet	3151739	3149849	3151739	5.04e-06	0.0286	S2_DM
2L_22928904_SNP	8.27e-09	0.045	FBgn0046706	2RHet	3199376	3199376	3234607	6.55e-06	0.0286	S2_DM
2L_22928904_SNP	8.66e-13	0.0441	XLOC_011704	2RHet	1921599	1921599	1923490	6.55e-06	0.0286	S2_DM
2L_22928904_SNP	3.71e-12	0.0494	XLOC_011705	2RHet	1924263	1924263	1926950	6.55e-06	0.0286	S2_DM
2L_22928904_SNP	3.85e-09	0.0482	XLOC_011789	2RHet	3215567	3215567	3217239	6.55e-06	0.0286	S2_DM
2L_22928904_SNP	9.02e-10	0.0499	XLOC_011977	2RHet	1591609	1590552	1591609	6.55e-06	0.0286	S2_DM
2L_22928904_SNP	6.35e-11	0.0482	XLOC_012081	2RHet	3151739	3149849	3151739	6.55e-06	0.0286	S2_DM
2L_22933776_SNP	7.95e-09	0.05	FBgn0262887	2L	22961737	22961737	22963456	3.15e-07	0.0286	S2_DM
2L_22933776_SNP	3.2e-08	0.0499	FBgn0267986	U	3533522	3533522	3534680	3.15e-07	0.0286	S2_DM
2L_22933853_SNP	2.15e-09	0.05	FBgn0262887	2L	22961737	22961737	22963456	5.13e-08	0.0286	S2_DM
2L_22933853_SNP	1.17e-08	0.0499	FBgn0267986	U	3533522	3533522	3534680	5.13e-08	0.0286	S2_DM
2L_22933939_SNP	6.68e-10	0.05	FBgn0262887	2L	22961737	22961737	22963456	1.78e-07	0.0286	S2_DM
2L_22933939_SNP	1.69e-08	0.0499	FBgn0267986	U	3533522	3533522	3534680	1.78e-07	0.0286	S2_DM
2L_22933939_SNP	6.72e-06	0.045	XLOC_011651	2RHet	861402	861402	862533	1.78e-07	0.0286	S2_DM
2L_22934007_SNP	1.48e-09	0.05	FBgn0262887	2L	22961737	22961737	22963456	2.18e-08	0.0286	S2_DM
2L_22934007_SNP	8.52e-09	0.0499	FBgn0267986	U	3533522	3533522	3534680	2.18e-08	0.0286	S2_DM
2L_22934007_SNP	4.23e-06	0.045	XLOC_011651	2RHet	861402	861402	862533	2.18e-08	0.0286	S2_DM
2L_22939298_SNP	4.19e-06	0.05	FBgn0262887	2L	22961737	22961737	22963456	3.79e-07	0.0286	S2_DM
2L_22939298_SNP	4.36e-07	0.045	XLOC_011651	2RHet	861402	861402	862533	3.79e-07	0.0286	S2_DM
2L_22940374_SNP	1.55e-08	0.0441	XLOC_011704	2RHet	1921599	1921599	1923490	8.42e-06	0.0286	S2_DM
2L_22940374_SNP	1.13e-07	0.0494	XLOC_011705	2RHet	1924263	1924263	1926950	8.42e-06	0.0286	S2_DM
2L_22940374_SNP	4.47e-06	0.0482	XLOC_011789	2RHet	3215567	3215567	3217239	8.42e-06	0.0286	S2_DM
2L_22940374_SNP	8.45e-07	0.0499	XLOC_011977	2RHet	1591609	1590552	1591609	8.42e-06	0.0286	S2_DM
2L_22940374_SNP	3.51e-07	0.0482	XLOC_012081	2RHet	3151739	3149849	3151739	8.42e-06	0.0286	S2_DM
2L_22945248_INS	1.58e-06	0.0491	FBgn0032997	2R	506535	506535	508338	9.71e-06	0.0286	S2_DM
2L_22960745_SNP	5.26e-11	0.0441	XLOC_011704	2RHet	1921599	1921599	1923490	4.45e-07	0.0493	DOC4_DM
2L_22960745_SNP	5.26e-11	0.0441	XLOC_011704	2RHet	1921599	1921599	1923490	4e-06	0.0286	S2_DM
2L_22960745_SNP	4.33e-10	0.0494	XLOC_011705	2RHet	1924263	1924263	1926950	4e-06	0.0286	S2_DM
2L_22960745_SNP	4.33e-10	0.0494	XLOC_011705	2RHet	1924263	1924263	1926950	4.45e-07	0.0493	DOC4_DM
2L_22960745_SNP	2.81e-06	0.0482	XLOC_011789	2RHet	3215567	3215567	3217239	4.45e-07	0.0493	DOC4_DM
2L_22960745_SNP	2.81e-06	0.0482	XLOC_011789	2RHet	3215567	3215567	3217239	4e-06	0.0286	S2_DM
2L_22960745_SNP	4.94e-07	0.0499	XLOC_011977	2RHet	1591609	1590552	1591609	4e-06	0.0286	S2_DM
2L_22960745_SNP	4.94e-07	0.0499	XLOC_011977	2RHet	1591609	1590552	1591609	4.45e-07	0.0493	DOC4_DM
2L_22960745_SNP	1.32e-07	0.0482	XLOC_012081	2RHet	3151739	3149849	3151739	4e-06	0.0286	S2_DM
2L_22960745_SNP	1.32e-07	0.0482	XLOC_012081	2RHet	3151739	3149849	3151739	4.45e-07	0.0493	DOC4_DM
2L_22964114_SNP	4.37e-07	0.05	FBgn0262887	2L	22961737	22961737	22963456	5.96e-09	0.0286	S2_DM
2L_22964114_SNP	2.95e-08	0.0499	FBgn0267986	U	3533522	3533522	3534680	5.96e-09	0.0286	S2_DM
2L_22964114_SNP	1.9e-07	0.045	XLOC_011651	2RHet	861402	861402	862533	5.96e-09	0.0286	S2_DM
2L_22966212_SNP	4.49e-07	0.045	FBgn0046706	2RHet	3199376	3199376	3234607	1e-07	0.0493	DOC4_DM
2L_22966212_SNP	4.49e-07	0.045	FBgn0046706	2RHet	3199376	3199376	3234607	7.98e-07	0.0286	S2_DM
2L_22966212_SNP	1.23e-06	0.0499	XLOC_008884	2R	264145	262676	264145	7.98e-07	0.0286	S2_DM
2L_22966212_SNP	1.23e-06	0.0499	XLOC_008884	2R	264145	262676	264145	1e-07	0.0493	DOC4_DM
2L_22966212_SNP	1.16e-11	0.0441	XLOC_011704	2RHet	1921599	1921599	1923490	7.98e-07	0.0286	S2_DM
2L_22966212_SNP	1.16e-11	0.0441	XLOC_011704	2RHet	1921599	1921599	1923490	1e-07	0.0493	DOC4_DM
2L_22966212_SNP	2e-10	0.0494	XLOC_011705	2RHet	1924263	1924263	1926950	7.98e-07	0.0286	S2_DM
2L_22966212_SNP	2e-10	0.0494	XLOC_011705	2RHet	1924263	1924263	1926950	1e-07	0.0493	DOC4_DM
2L_22966212_SNP	2.79e-07	0.0482	XLOC_011789	2RHet	3215567	3215567	3217239	7.98e-07	0.0286	S2_DM
2L_22966212_SNP	2.79e-07	0.0482	XLOC_011789	2RHet	3215567	3215567	3217239	1e-07	0.0493	DOC4_DM
2L_22966212_SNP	1.51e-07	0.0499	XLOC_011977	2RHet	1591609	1590552	1591609	1e-07	0.0493	DOC4_DM
2L_22966212_SNP	1.51e-07	0.0499	XLOC_011977	2RHet	1591609	1590552	1591609	7.98e-07	0.0286	S2_DM
2L_22966212_SNP	5.12e-08	0.0482	XLOC_012081	2RHet	3151739	3149849	3151739	1e-07	0.0493	DOC4_DM
2L_22966212_SNP	5.12e-08	0.0482	XLOC_012081	2RHet	3151739	3149849	3151739	7.98e-07	0.0286	S2_DM
2L_22966581_SNP	2.56e-07	0.05	FBgn0262887	2L	22961737	22961737	22963456	6.31e-09	0.0286	S2_DM
2L_22966581_SNP	1.47e-08	0.0499	FBgn0267986	U	3533522	3533522	3534680	6.31e-09	0.0286	S2_DM
2L_22966581_SNP	1.21e-07	0.045	XLOC_011651	2RHet	861402	861402	862533	6.31e-09	0.0286	S2_DM
2L_22967090_SNP	1.75e-06	0.05	FBgn0262887	2L	22961737	22961737	22963456	7.38e-09	0.0286	S2_DM
2L_22967090_SNP	7.07e-06	0.0495	XLOC_006268	2R	21910	21910	24748	7.38e-09	0.0286	S2_DM
2L_22967090_SNP	1.27e-07	0.045	XLOC_011651	2RHet	861402	861402	862533	7.38e-09	0.0286	S2_DM
2L_22967180_SNP	1.07e-11	0.0441	XLOC_011704	2RHet	1921599	1921599	1923490	3.31e-07	0.0493	DOC4_DM
2L_22967180_SNP	1.07e-11	0.0441	XLOC_011704	2RHet	1921599	1921599	1923490	1.8e-06	0.0286	S2_DM
2L_22967180_SNP	5.27e-11	0.0494	XLOC_011705	2RHet	1924263	1924263	1926950	1.8e-06	0.0286	S2_DM
2L_22967180_SNP	5.27e-11	0.0494	XLOC_011705	2RHet	1924263	1924263	1926950	3.31e-07	0.0493	DOC4_DM
2L_22967180_SNP	2.92e-07	0.0482	XLOC_011789	2RHet	3215567	3215567	3217239	3.31e-07	0.0493	DOC4_DM
2L_22967180_SNP	2.92e-07	0.0482	XLOC_011789	2RHet	3215567	3215567	3217239	1.8e-06	0.0286	S2_DM
2L_22967180_SNP	8.15e-09	0.0499	XLOC_011977	2RHet	1591609	1590552	1591609	3.31e-07	0.0493	DOC4_DM
2L_22967180_SNP	8.15e-09	0.0499	XLOC_011977	2RHet	1591609	1590552	1591609	1.8e-06	0.0286	S2_DM
2L_22967180_SNP	4.69e-08	0.0482	XLOC_012081	2RHet	3151739	3149849	3151739	3.31e-07	0.0493	DOC4_DM
2L_22967180_SNP	4.69e-08	0.0482	XLOC_012081	2RHet	3151739	3149849	3151739	1.8e-06	0.0286	S2_DM
2L_22967850_SNP	1.48e-08	0.045	FBgn0046706	2RHet	3199376	3199376	3234607	9.69e-06	0.0286	S2_DM
2L_22967850_SNP	2.95e-06	0.0499	XLOC_008884	2R	264145	262676	264145	9.69e-06	0.0286	S2_DM
2L_22967850_SNP	3.33e-12	0.0441	XLOC_011704	2RHet	1921599	1921599	1923490	9.69e-06	0.0286	S2_DM
2L_22967850_SNP	3.65e-11	0.0494	XLOC_011705	2RHet	1924263	1924263	1926950	9.69e-06	0.0286	S2_DM
2L_22967850_SNP	2.01e-08	0.0482	XLOC_011789	2RHet	3215567	3215567	3217239	9.69e-06	0.0286	S2_DM
2L_22967850_SNP	5.91e-10	0.0499	XLOC_011977	2RHet	1591609	1590552	1591609	9.69e-06	0.0286	S2_DM
2L_22967850_SNP	3.55e-10	0.0482	XLOC_012081	2RHet	3151739	3149849	3151739	9.69e-06	0.0286	S2_DM
2L_22971035_SNP	1.12e-07	0.045	FBgn0046706	2RHet	3199376	3199376	3234607	7.4e-06	0.0286	S2_DM
2L_22971035_SNP	1.61e-06	0.0497	XLOC_011663	2RHet	1111250	1111250	1139594	7.4e-06	0.0286	S2_DM
2L_22971035_SNP	1.42e-11	0.0441	XLOC_011704	2RHet	1921599	1921599	1923490	7.4e-06	0.0286	S2_DM
2L_22971035_SNP	1.11e-10	0.0494	XLOC_011705	2RHet	1924263	1924263	1926950	7.4e-06	0.0286	S2_DM
2L_22971035_SNP	3.87e-08	0.0482	XLOC_011789	2RHet	3215567	3215567	3217239	7.4e-06	0.0286	S2_DM
2L_22971035_SNP	4.7e-10	0.0499	XLOC_011977	2RHet	1591609	1590552	1591609	7.4e-06	0.0286	S2_DM
2L_22971035_SNP	1.54e-09	0.0482	XLOC_012081	2RHet	3151739	3149849	3151739	7.4e-06	0.0286	S2_DM
2L_22971520_SNP	4.62e-07	0.05	FBgn0262887	2L	22961737	22961737	22963456	9.22e-09	0.0286	S2_DM
2L_22971520_SNP	4e-08	0.0499	FBgn0267986	U	3533522	3533522	3534680	9.22e-09	0.0286	S2_DM
2L_22971520_SNP	8.43e-07	0.045	XLOC_011651	2RHet	861402	861402	862533	9.22e-09	0.0286	S2_DM
2L_22973422_SNP	4.72e-07	0.05	FBgn0262887	2L	22961737	22961737	22963456	5.02e-09	0.0286	S2_DM
2L_22973422_SNP	3.4e-08	0.0499	FBgn0267986	U	3533522	3533522	3534680	5.02e-09	0.0286	S2_DM
2L_22973422_SNP	1.16e-06	0.045	XLOC_011651	2RHet	861402	861402	862533	5.02e-09	0.0286	S2_DM
2L_22974998_SNP	2.72e-07	0.05	FBgn0262887	2L	22961737	22961737	22963456	4.02e-10	0.0286	S2_DM
2L_22974998_SNP	6.35e-07	0.045	XLOC_011651	2RHet	861402	861402	862533	4.02e-10	0.0286	S2_DM
2L_22976219_SNP	7.29e-09	0.05	FBgn0262887	2L	22961737	22961737	22963456	9.5e-07	0.0286	S2_DM
2L_22976219_SNP	4.09e-09	0.0499	FBgn0267986	U	3533522	3533522	3534680	9.5e-07	0.0286	S2_DM
2L_22976667_SNP	5.61e-07	0.05	FBgn0262887	2L	22961737	22961737	22963456	3.13e-09	0.0286	S2_DM
2L_22976667_SNP	6.47e-08	0.0499	FBgn0267986	U	3533522	3533522	3534680	3.13e-09	0.0286	S2_DM
2L_22976667_SNP	1.28e-06	0.045	XLOC_011651	2RHet	861402	861402	862533	3.13e-09	0.0286	S2_DM
2L_22977084_SNP	6.95e-07	0.05	FBgn0262887	2L	22961737	22961737	22963456	1.49e-08	0.0286	S2_DM
2L_22977084_SNP	2.27e-08	0.0499	FBgn0267986	U	3533522	3533522	3534680	1.49e-08	0.0286	S2_DM
2L_22977084_SNP	2.99e-07	0.045	XLOC_011651	2RHet	861402	861402	862533	1.49e-08	0.0286	S2_DM
2L_22977086_SNP	6.95e-07	0.05	FBgn0262887	2L	22961737	22961737	22963456	7.43e-10	0.0286	S2_DM
2L_22977086_SNP	2.44e-08	0.0499	FBgn0267986	U	3533522	3533522	3534680	7.43e-10	0.0286	S2_DM
2L_22977086_SNP	3.25e-07	0.045	XLOC_011651	2RHet	861402	861402	862533	7.43e-10	0.0286	S2_DM
2L_22977746_SNP	5.28e-07	0.05	FBgn0262887	2L	22961737	22961737	22963456	5.05e-09	0.0286	S2_DM
2L_22977746_SNP	1.26e-08	0.0499	FBgn0267986	U	3533522	3533522	3534680	5.05e-09	0.0286	S2_DM
2L_22977746_SNP	2.95e-07	0.045	XLOC_011651	2RHet	861402	861402	862533	5.05e-09	0.0286	S2_DM
2L_22978015_SNP	7.77e-08	0.045	FBgn0046706	2RHet	3199376	3199376	3234607	2.21e-07	0.0286	S2_DM
2L_22978015_SNP	7.77e-08	0.045	FBgn0046706	2RHet	3199376	3199376	3234607	7.53e-08	0.0493	DOC4_DM
2L_22978015_SNP	2.83e-06	0.0499	XLOC_008884	2R	264145	262676	264145	7.53e-08	0.0493	DOC4_DM
2L_22978015_SNP	2.83e-06	0.0499	XLOC_008884	2R	264145	262676	264145	2.21e-07	0.0286	S2_DM
2L_22978015_SNP	1.03e-12	0.0441	XLOC_011704	2RHet	1921599	1921599	1923490	2.21e-07	0.0286	S2_DM
2L_22978015_SNP	1.03e-12	0.0441	XLOC_011704	2RHet	1921599	1921599	1923490	7.53e-08	0.0493	DOC4_DM
2L_22978015_SNP	9.68e-11	0.0494	XLOC_011705	2RHet	1924263	1924263	1926950	7.53e-08	0.0493	DOC4_DM
2L_22978015_SNP	9.68e-11	0.0494	XLOC_011705	2RHet	1924263	1924263	1926950	2.21e-07	0.0286	S2_DM
2L_22978015_SNP	6.56e-09	0.0482	XLOC_011789	2RHet	3215567	3215567	3217239	7.53e-08	0.0493	DOC4_DM
2L_22978015_SNP	6.56e-09	0.0482	XLOC_011789	2RHet	3215567	3215567	3217239	2.21e-07	0.0286	S2_DM
2L_22978015_SNP	4.43e-10	0.0499	XLOC_011977	2RHet	1591609	1590552	1591609	7.53e-08	0.0493	DOC4_DM
2L_22978015_SNP	4.43e-10	0.0499	XLOC_011977	2RHet	1591609	1590552	1591609	2.21e-07	0.0286	S2_DM
2L_22978015_SNP	7.88e-09	0.0482	XLOC_012081	2RHet	3151739	3149849	3151739	2.21e-07	0.0286	S2_DM
2L_22978015_SNP	7.88e-09	0.0482	XLOC_012081	2RHet	3151739	3149849	3151739	7.53e-08	0.0493	DOC4_DM
2L_22978041_SNP	4.87e-08	0.045	FBgn0046706	2RHet	3199376	3199376	3234607	1.57e-06	0.0286	S2_DM
2L_22978041_SNP	1.41e-06	0.0497	XLOC_011663	2RHet	1111250	1111250	1139594	1.57e-06	0.0286	S2_DM
2L_22978041_SNP	1.87e-12	0.0441	XLOC_011704	2RHet	1921599	1921599	1923490	1.57e-06	0.0286	S2_DM
2L_22978041_SNP	2.27e-10	0.0494	XLOC_011705	2RHet	1924263	1924263	1926950	1.57e-06	0.0286	S2_DM
2L_22978041_SNP	2.38e-09	0.0482	XLOC_011789	2RHet	3215567	3215567	3217239	1.57e-06	0.0286	S2_DM
2L_22978041_SNP	5.94e-10	0.0499	XLOC_011977	2RHet	1591609	1590552	1591609	1.57e-06	0.0286	S2_DM
2L_22978041_SNP	6.97e-10	0.0482	XLOC_012081	2RHet	3151739	3149849	3151739	1.57e-06	0.0286	S2_DM
2L_22980280_SNP	7.33e-08	0.045	FBgn0046706	2RHet	3199376	3199376	3234607	2.98e-06	0.0286	S2_DM
2L_22980280_SNP	4.6e-07	0.0497	XLOC_011663	2RHet	1111250	1111250	1139594	2.98e-06	0.0286	S2_DM
2L_22980280_SNP	4.73e-12	0.0441	XLOC_011704	2RHet	1921599	1921599	1923490	2.98e-06	0.0286	S2_DM
2L_22980280_SNP	2.43e-11	0.0494	XLOC_011705	2RHet	1924263	1924263	1926950	2.98e-06	0.0286	S2_DM
2L_22980280_SNP	8.88e-09	0.0482	XLOC_011789	2RHet	3215567	3215567	3217239	2.98e-06	0.0286	S2_DM
2L_22980280_SNP	9.12e-11	0.0499	XLOC_011977	2RHet	1591609	1590552	1591609	2.98e-06	0.0286	S2_DM
2L_22980280_SNP	3.3e-10	0.0482	XLOC_012081	2RHet	3151739	3149849	3151739	2.98e-06	0.0286	S2_DM
2L_22980450_SNP	1.28e-06	0.05	FBgn0262887	2L	22961737	22961737	22963456	9.95e-09	0.0286	S2_DM
2L_22980450_SNP	2.58e-08	0.0499	FBgn0267986	U	3533522	3533522	3534680	9.95e-09	0.0286	S2_DM
2L_22980450_SNP	5.67e-07	0.045	XLOC_011651	2RHet	861402	861402	862533	9.95e-09	0.0286	S2_DM
2L_22980508_SNP	1.25e-07	0.045	FBgn0046706	2RHet	3199376	3199376	3234607	1.61e-06	0.0286	S2_DM
2L_22980508_SNP	1.62e-07	0.0497	XLOC_011663	2RHet	1111250	1111250	1139594	1.61e-06	0.0286	S2_DM
2L_22980508_SNP	5.64e-11	0.0441	XLOC_011704	2RHet	1921599	1921599	1923490	1.61e-06	0.0286	S2_DM
2L_22980508_SNP	5.63e-10	0.0494	XLOC_011705	2RHet	1924263	1924263	1926950	1.61e-06	0.0286	S2_DM
2L_22980508_SNP	1.71e-07	0.0482	XLOC_011789	2RHet	3215567	3215567	3217239	1.61e-06	0.0286	S2_DM
2L_22980508_SNP	3.54e-08	0.0499	XLOC_011977	2RHet	1591609	1590552	1591609	1.61e-06	0.0286	S2_DM
2L_22980508_SNP	4.84e-09	0.0482	XLOC_012081	2RHet	3151739	3149849	3151739	1.61e-06	0.0286	S2_DM
2L_22982128_SNP	2.68e-06	0.05	FBgn0262887	2L	22961737	22961737	22963456	1.37e-08	0.0286	S2_DM
2L_22982128_SNP	1.84e-08	0.0499	FBgn0267986	U	3533522	3533522	3534680	1.37e-08	0.0286	S2_DM
2L_22982128_SNP	7.37e-06	0.045	XLOC_011651	2RHet	861402	861402	862533	1.37e-08	0.0286	S2_DM
2L_22982130_SNP	1.4e-06	0.05	FBgn0262887	2L	22961737	22961737	22963456	3.1e-09	0.0286	S2_DM
2L_22982130_SNP	1.63e-08	0.0499	FBgn0267986	U	3533522	3533522	3534680	3.1e-09	0.0286	S2_DM
2L_22982130_SNP	7.19e-06	0.045	XLOC_011651	2RHet	861402	861402	862533	3.1e-09	0.0286	S2_DM
2L_22982131_SNP	6.62e-07	0.05	FBgn0262887	2L	22961737	22961737	22963456	4.34e-09	0.0286	S2_DM
2L_22982131_SNP	5.1e-09	0.0499	FBgn0267986	U	3533522	3533522	3534680	4.34e-09	0.0286	S2_DM
2L_22982131_SNP	6.61e-06	0.045	XLOC_011651	2RHet	861402	861402	862533	4.34e-09	0.0286	S2_DM
2L_3522662_SNP	6.2e-11	0.0462	FBgn0031547	2L	3524056	3522521	3524056	7.8e-06	0.0286	S2_DM
2L_3522662_SNP	1.38e-09	0.0499	XLOC_008884	2R	264145	262676	264145	7.8e-06	0.0286	S2_DM
2R_10037_SNP	1.3e-11	0.045	FBgn0046706	2RHet	3199376	3199376	3234607	1.5e-07	0.0493	DOC4_DM
2R_10037_SNP	1.81e-07	0.0499	XLOC_008884	2R	264145	262676	264145	1.5e-07	0.0493	DOC4_DM
2R_10037_SNP	1.89e-09	0.0441	XLOC_011704	2RHet	1921599	1921599	1923490	1.5e-07	0.0493	DOC4_DM
2R_10037_SNP	4.38e-09	0.0494	XLOC_011705	2RHet	1924263	1924263	1926950	1.5e-07	0.0493	DOC4_DM
2R_10037_SNP	1.72e-10	0.0482	XLOC_011789	2RHet	3215567	3215567	3217239	1.5e-07	0.0493	DOC4_DM
2R_10037_SNP	9.2e-07	0.0499	XLOC_011977	2RHet	1591609	1590552	1591609	1.5e-07	0.0493	DOC4_DM
2R_10037_SNP	2.12e-09	0.0482	XLOC_012081	2RHet	3151739	3149849	3151739	1.5e-07	0.0493	DOC4_DM
2R_117314_SNP	1.6e-12	0.045	FBgn0046706	2RHet	3199376	3199376	3234607	1.8e-08	0.0493	DOC4_DM
2R_117314_SNP	4.09e-10	0.0499	XLOC_008884	2R	264145	262676	264145	1.8e-08	0.0493	DOC4_DM
2R_117314_SNP	5.73e-09	0.0441	XLOC_011704	2RHet	1921599	1921599	1923490	1.8e-08	0.0493	DOC4_DM
2R_117314_SNP	4.32e-10	0.0494	XLOC_011705	2RHet	1924263	1924263	1926950	1.8e-08	0.0493	DOC4_DM
2R_117314_SNP	1.26e-09	0.0482	XLOC_011789	2RHet	3215567	3215567	3217239	1.8e-08	0.0493	DOC4_DM
2R_117314_SNP	2.63e-08	0.0482	XLOC_012081	2RHet	3151739	3149849	3151739	1.8e-08	0.0493	DOC4_DM
2R_117319_SNP	9.31e-14	0.045	FBgn0046706	2RHet	3199376	3199376	3234607	1.35e-07	0.0493	DOC4_DM
2R_117319_SNP	4.66e-08	0.0499	XLOC_008884	2R	264145	262676	264145	1.35e-07	0.0493	DOC4_DM
2R_117319_SNP	8.46e-07	0.0499	XLOC_008927	2R	565520	563804	565520	1.35e-07	0.0493	DOC4_DM
2R_117319_SNP	2.39e-09	0.0441	XLOC_011704	2RHet	1921599	1921599	1923490	1.35e-07	0.0493	DOC4_DM
2R_117319_SNP	2.84e-09	0.0494	XLOC_011705	2RHet	1924263	1924263	1926950	1.35e-07	0.0493	DOC4_DM
2R_117319_SNP	1.64e-12	0.0482	XLOC_011789	2RHet	3215567	3215567	3217239	1.35e-07	0.0493	DOC4_DM
2R_117319_SNP	1.83e-08	0.0482	XLOC_012081	2RHet	3151739	3149849	3151739	1.35e-07	0.0493	DOC4_DM
2R_117363_SNP	1.82e-11	0.045	FBgn0046706	2RHet	3199376	3199376	3234607	8.17e-07	0.0493	DOC4_DM
2R_117363_SNP	5.78e-07	0.0499	XLOC_008884	2R	264145	262676	264145	8.17e-07	0.0493	DOC4_DM
2R_117363_SNP	1.51e-08	0.0441	XLOC_011704	2RHet	1921599	1921599	1923490	8.17e-07	0.0493	DOC4_DM
2R_117363_SNP	5.5e-07	0.0494	XLOC_011705	2RHet	1924263	1924263	1926950	8.17e-07	0.0493	DOC4_DM
2R_117363_SNP	8.41e-12	0.0482	XLOC_011789	2RHet	3215567	3215567	3217239	8.17e-07	0.0493	DOC4_DM
2R_117363_SNP	6.61e-09	0.0482	XLOC_012081	2RHet	3151739	3149849	3151739	8.17e-07	0.0493	DOC4_DM
2R_117380_SNP	2.49e-09	0.045	FBgn0046706	2RHet	3199376	3199376	3234607	2.22e-07	0.0493	DOC4_DM
2R_117380_SNP	8.3e-07	0.0499	XLOC_008884	2R	264145	262676	264145	2.22e-07	0.0493	DOC4_DM
2R_117380_SNP	5.94e-08	0.0441	XLOC_011704	2RHet	1921599	1921599	1923490	2.22e-07	0.0493	DOC4_DM
2R_117380_SNP	1.72e-07	0.0494	XLOC_011705	2RHet	1924263	1924263	1926950	2.22e-07	0.0493	DOC4_DM
2R_117380_SNP	1.95e-09	0.0482	XLOC_011789	2RHet	3215567	3215567	3217239	2.22e-07	0.0493	DOC4_DM
2R_117380_SNP	1.88e-06	0.0482	XLOC_012081	2RHet	3151739	3149849	3151739	2.22e-07	0.0493	DOC4_DM
2R_119225_SNP	4.19e-10	0.0499	XLOC_006282	2R	78321	78321	108264	3.49e-07	0.0486	ACCORD2_I
2R_119225_SNP	1.5e-06	0.0486	XLOC_011942	2RHet	1262608	1258487	1262608	3.49e-07	0.0486	ACCORD2_I
2R_119253_SNP	2.63e-16	0.045	FBgn0046706	2RHet	3199376	3199376	3234607	1.46e-13	0.0493	DOC4_DM
2R_119253_SNP	1.06e-08	0.0472	XLOC_008881	2R	250706	249434	250706	1.46e-13	0.0493	DOC4_DM
2R_119253_SNP	5.87e-13	0.0499	XLOC_008884	2R	264145	262676	264145	1.46e-13	0.0493	DOC4_DM
2R_119253_SNP	5.62e-13	0.0441	XLOC_011704	2RHet	1921599	1921599	1923490	1.46e-13	0.0493	DOC4_DM
2R_119253_SNP	8.51e-14	0.0494	XLOC_011705	2RHet	1924263	1924263	1926950	1.46e-13	0.0493	DOC4_DM
2R_119253_SNP	6.57e-15	0.0482	XLOC_011789	2RHet	3215567	3215567	3217239	1.46e-13	0.0493	DOC4_DM
2R_119253_SNP	2.44e-08	0.0499	XLOC_011977	2RHet	1591609	1590552	1591609	1.46e-13	0.0493	DOC4_DM
2R_119253_SNP	9.05e-13	0.0482	XLOC_012081	2RHet	3151739	3149849	3151739	1.46e-13	0.0493	DOC4_DM
2R_119832_SNP	2.08e-14	0.045	FBgn0046706	2RHet	3199376	3199376	3234607	6.17e-09	0.0493	DOC4_DM
2R_119832_SNP	6.75e-08	0.0499	XLOC_008884	2R	264145	262676	264145	6.17e-09	0.0493	DOC4_DM
2R_119832_SNP	5.47e-07	0.0499	XLOC_008927	2R	565520	563804	565520	6.17e-09	0.0493	DOC4_DM
2R_119832_SNP	1.89e-10	0.0441	XLOC_011704	2RHet	1921599	1921599	1923490	6.17e-09	0.0493	DOC4_DM
2R_119832_SNP	1.18e-09	0.0494	XLOC_011705	2RHet	1924263	1924263	1926950	6.17e-09	0.0493	DOC4_DM
2R_119832_SNP	5.88e-15	0.0482	XLOC_011789	2RHet	3215567	3215567	3217239	6.17e-09	0.0493	DOC4_DM
2R_119832_SNP	1.1e-11	0.0482	XLOC_012081	2RHet	3151739	3149849	3151739	6.17e-09	0.0493	DOC4_DM
2R_12079_SNP	1.26e-08	0.0495	XLOC_006268	2R	21910	21910	24748	3.44e-07	0.0486	ACCORD2_I
2R_12079_SNP	1.94e-11	0.0499	XLOC_006282	2R	78321	78321	108264	3.44e-07	0.0486	ACCORD2_I
2R_12079_SNP	2.32e-06	0.045	XLOC_011651	2RHet	861402	861402	862533	3.44e-07	0.0486	ACCORD2_I
2R_12079_SNP	4.14e-12	0.0486	XLOC_011942	2RHet	1262608	1258487	1262608	3.44e-07	0.0486	ACCORD2_I
2R_121495_SNP	2.79e-06	0.0491	FBgn0032997	2R	506535	506535	508338	2.98e-07	0.0486	ACCORD2_I
2R_121495_SNP	2.45e-10	0.0499	XLOC_006282	2R	78321	78321	108264	2.98e-07	0.0486	ACCORD2_I
2R_121496_SNP	6.97e-10	0.0499	XLOC_006282	2R	78321	78321	108264	1.14e-07	0.0486	ACCORD2_I
2R_121496_SNP	2.38e-06	0.0486	XLOC_011942	2RHet	1262608	1258487	1262608	1.14e-07	0.0486	ACCORD2_I
2R_121505_SNP	2.84e-16	0.045	FBgn0046706	2RHet	3199376	3199376	3234607	2.61e-10	0.0493	DOC4_DM
2R_121505_SNP	3.88e-09	0.0499	XLOC_008884	2R	264145	262676	264145	2.61e-10	0.0493	DOC4_DM
2R_121505_SNP	1.9e-11	0.0441	XLOC_011704	2RHet	1921599	1921599	1923490	2.61e-10	0.0493	DOC4_DM
2R_121505_SNP	7.89e-11	0.0494	XLOC_011705	2RHet	1924263	1924263	1926950	2.61e-10	0.0493	DOC4_DM
2R_121505_SNP	5.3e-16	0.0482	XLOC_011789	2RHet	3215567	3215567	3217239	2.61e-10	0.0493	DOC4_DM
2R_121505_SNP	9.27e-12	0.0482	XLOC_012081	2RHet	3151739	3149849	3151739	2.61e-10	0.0493	DOC4_DM
2R_121858_DEL	1.99e-17	0.045	FBgn0046706	2RHet	3199376	3199376	3234607	1.86e-07	0.0491	INVADER1_I
2R_121858_DEL	1.99e-17	0.045	FBgn0046706	2RHet	3199376	3199376	3234607	1.74e-12	0.0493	DOC4_DM
2R_121858_DEL	1.11e-12	0.0499	XLOC_008884	2R	264145	262676	264145	1.74e-12	0.0493	DOC4_DM
2R_121858_DEL	1.11e-12	0.0499	XLOC_008884	2R	264145	262676	264145	1.86e-07	0.0491	INVADER1_I
2R_121858_DEL	4.34e-13	0.0441	XLOC_011704	2RHet	1921599	1921599	1923490	1.86e-07	0.0491	INVADER1_I
2R_121858_DEL	4.34e-13	0.0441	XLOC_011704	2RHet	1921599	1921599	1923490	1.74e-12	0.0493	DOC4_DM
2R_121858_DEL	8.49e-12	0.0494	XLOC_011705	2RHet	1924263	1924263	1926950	1.74e-12	0.0493	DOC4_DM
2R_121858_DEL	8.49e-12	0.0494	XLOC_011705	2RHet	1924263	1924263	1926950	1.86e-07	0.0491	INVADER1_I
2R_121858_DEL	2.26e-15	0.0482	XLOC_011789	2RHet	3215567	3215567	3217239	1.74e-12	0.0493	DOC4_DM
2R_121858_DEL	2.26e-15	0.0482	XLOC_011789	2RHet	3215567	3215567	3217239	1.86e-07	0.0491	INVADER1_I
2R_121858_DEL	3.02e-09	0.0499	XLOC_011977	2RHet	1591609	1590552	1591609	1.86e-07	0.0491	INVADER1_I
2R_121858_DEL	3.02e-09	0.0499	XLOC_011977	2RHet	1591609	1590552	1591609	1.74e-12	0.0493	DOC4_DM
2R_121858_DEL	4.2e-11	0.0482	XLOC_012081	2RHet	3151739	3149849	3151739	1.74e-12	0.0493	DOC4_DM
2R_121858_DEL	4.2e-11	0.0482	XLOC_012081	2RHet	3151739	3149849	3151739	1.86e-07	0.0491	INVADER1_I
2R_122549_SNP	5.29e-17	0.045	FBgn0046706	2RHet	3199376	3199376	3234607	3.77e-10	0.0493	DOC4_DM
2R_122549_SNP	1.5e-09	0.0499	XLOC_008884	2R	264145	262676	264145	3.77e-10	0.0493	DOC4_DM
2R_122549_SNP	3.59e-11	0.0441	XLOC_011704	2RHet	1921599	1921599	1923490	3.77e-10	0.0493	DOC4_DM
2R_122549_SNP	3.58e-10	0.0494	XLOC_011705	2RHet	1924263	1924263	1926950	3.77e-10	0.0493	DOC4_DM
2R_122549_SNP	5.33e-16	0.0482	XLOC_011789	2RHet	3215567	3215567	3217239	3.77e-10	0.0493	DOC4_DM
2R_122549_SNP	1.09e-11	0.0482	XLOC_012081	2RHet	3151739	3149849	3151739	3.77e-10	0.0493	DOC4_DM
2R_123268_SNP	3.76e-17	0.045	FBgn0046706	2RHet	3199376	3199376	3234607	1.27e-10	0.0493	DOC4_DM
2R_123268_SNP	1.15e-10	0.0499	XLOC_008884	2R	264145	262676	264145	1.27e-10	0.0493	DOC4_DM
2R_123268_SNP	1.32e-12	0.0441	XLOC_011704	2RHet	1921599	1921599	1923490	1.27e-10	0.0493	DOC4_DM
2R_123268_SNP	1.42e-11	0.0494	XLOC_011705	2RHet	1924263	1924263	1926950	1.27e-10	0.0493	DOC4_DM
2R_123268_SNP	4.3e-18	0.0482	XLOC_011789	2RHet	3215567	3215567	3217239	1.27e-10	0.0493	DOC4_DM
2R_123268_SNP	9.97e-16	0.0482	XLOC_012081	2RHet	3151739	3149849	3151739	1.27e-10	0.0493	DOC4_DM
2R_124180_SNP	1.94e-12	0.045	FBgn0046706	2RHet	3199376	3199376	3234607	1.02e-07	0.0493	DOC4_DM
2R_124180_SNP	2.35e-07	0.0499	XLOC_008884	2R	264145	262676	264145	1.02e-07	0.0493	DOC4_DM
2R_124180_SNP	3.32e-08	0.0441	XLOC_011704	2RHet	1921599	1921599	1923490	1.02e-07	0.0493	DOC4_DM
2R_124180_SNP	7.98e-07	0.0494	XLOC_011705	2RHet	1924263	1924263	1926950	1.02e-07	0.0493	DOC4_DM
2R_124180_SNP	2.16e-12	0.0482	XLOC_011789	2RHet	3215567	3215567	3217239	1.02e-07	0.0493	DOC4_DM
2R_124180_SNP	4.03e-10	0.0482	XLOC_012081	2RHet	3151739	3149849	3151739	1.02e-07	0.0493	DOC4_DM
2R_124230_SNP	1.25e-11	0.045	FBgn0046706	2RHet	3199376	3199376	3234607	2.65e-08	0.0493	DOC4_DM
2R_124230_SNP	2.08e-07	0.0499	XLOC_008884	2R	264145	262676	264145	2.65e-08	0.0493	DOC4_DM
2R_124230_SNP	1.96e-08	0.0441	XLOC_011704	2RHet	1921599	1921599	1923490	2.65e-08	0.0493	DOC4_DM
2R_124230_SNP	4.28e-07	0.0494	XLOC_011705	2RHet	1924263	1924263	1926950	2.65e-08	0.0493	DOC4_DM
2R_124230_SNP	3.15e-14	0.0482	XLOC_011789	2RHet	3215567	3215567	3217239	2.65e-08	0.0493	DOC4_DM
2R_124230_SNP	2.88e-11	0.0482	XLOC_012081	2RHet	3151739	3149849	3151739	2.65e-08	0.0493	DOC4_DM
2R_125275_DEL	5.75e-11	0.045	FBgn0046706	2RHet	3199376	3199376	3234607	8.88e-08	0.0493	DOC4_DM
2R_125275_DEL	2.46e-10	0.0499	XLOC_008884	2R	264145	262676	264145	8.88e-08	0.0493	DOC4_DM
2R_125275_DEL	8.31e-08	0.0441	XLOC_011704	2RHet	1921599	1921599	1923490	8.88e-08	0.0493	DOC4_DM
2R_125275_DEL	3.61e-06	0.0494	XLOC_011705	2RHet	1924263	1924263	1926950	8.88e-08	0.0493	DOC4_DM
2R_125275_DEL	7.77e-11	0.0482	XLOC_011789	2RHet	3215567	3215567	3217239	8.88e-08	0.0493	DOC4_DM
2R_125275_DEL	1.32e-07	0.0482	XLOC_012081	2RHet	3151739	3149849	3151739	8.88e-08	0.0493	DOC4_DM
2R_125379_SNP	4.85e-16	0.045	FBgn0046706	2RHet	3199376	3199376	3234607	2.97e-10	0.0493	DOC4_DM
2R_125379_SNP	5.46e-09	0.0499	XLOC_008884	2R	264145	262676	264145	2.97e-10	0.0493	DOC4_DM
2R_125379_SNP	1.13e-11	0.0441	XLOC_011704	2RHet	1921599	1921599	1923490	2.97e-10	0.0493	DOC4_DM
2R_125379_SNP	3.45e-10	0.0494	XLOC_011705	2RHet	1924263	1924263	1926950	2.97e-10	0.0493	DOC4_DM
2R_125379_SNP	4.14e-16	0.0482	XLOC_011789	2RHet	3215567	3215567	3217239	2.97e-10	0.0493	DOC4_DM
2R_125379_SNP	1.16e-12	0.0482	XLOC_012081	2RHet	3151739	3149849	3151739	2.97e-10	0.0493	DOC4_DM
2R_125746_SNP	1.21e-06	0.0491	FBgn0032997	2R	506535	506535	508338	4.26e-07	0.0486	ACCORD2_I
2R_125746_SNP	5.6e-07	0.0499	XLOC_006282	2R	78321	78321	108264	4.26e-07	0.0486	ACCORD2_I
2R_127875_DEL	2.25e-09	0.0499	XLOC_006282	2R	78321	78321	108264	2.81e-08	0.0486	ACCORD2_I
2R_12937_SNP	4.06e-07	0.0492	FBgn0085732	2RHet	337700	337700	340299	5.85e-09	0.0486	ACCORD2_I
2R_12937_SNP	7.37e-07	0.0499	XLOC_006282	2R	78321	78321	108264	5.85e-09	0.0486	ACCORD2_I
2R_130941_SNP	8.05e-16	0.045	FBgn0046706	2RHet	3199376	3199376	3234607	4.63e-10	0.0493	DOC4_DM
2R_130941_SNP	5.15e-10	0.0499	XLOC_008884	2R	264145	262676	264145	4.63e-10	0.0493	DOC4_DM
2R_130941_SNP	1.48e-06	0.0499	XLOC_008927	2R	565520	563804	565520	4.63e-10	0.0493	DOC4_DM
2R_130941_SNP	1.38e-10	0.0441	XLOC_011704	2RHet	1921599	1921599	1923490	4.63e-10	0.0493	DOC4_DM
2R_130941_SNP	4.2e-09	0.0494	XLOC_011705	2RHet	1924263	1924263	1926950	4.63e-10	0.0493	DOC4_DM
2R_130941_SNP	3.05e-15	0.0482	XLOC_011789	2RHet	3215567	3215567	3217239	4.63e-10	0.0493	DOC4_DM
2R_130941_SNP	1.21e-09	0.0482	XLOC_012081	2RHet	3151739	3149849	3151739	4.63e-10	0.0493	DOC4_DM
2R_131732_SNP	2.98e-17	0.045	FBgn0046706	2RHet	3199376	3199376	3234607	2.6e-10	0.0493	DOC4_DM
2R_131732_SNP	9.64e-10	0.0499	XLOC_008884	2R	264145	262676	264145	2.6e-10	0.0493	DOC4_DM
2R_131732_SNP	8.24e-12	0.0441	XLOC_011704	2RHet	1921599	1921599	1923490	2.6e-10	0.0493	DOC4_DM
2R_131732_SNP	5.92e-10	0.0494	XLOC_011705	2RHet	1924263	1924263	1926950	2.6e-10	0.0493	DOC4_DM
2R_131732_SNP	1.59e-17	0.0482	XLOC_011789	2RHet	3215567	3215567	3217239	2.6e-10	0.0493	DOC4_DM
2R_131732_SNP	1.09e-11	0.0482	XLOC_012081	2RHet	3151739	3149849	3151739	2.6e-10	0.0493	DOC4_DM
2R_131854_DEL	7.91e-13	0.045	FBgn0046706	2RHet	3199376	3199376	3234607	1.57e-08	0.0493	DOC4_DM
2R_131854_DEL	2.49e-09	0.0499	XLOC_008884	2R	264145	262676	264145	1.57e-08	0.0493	DOC4_DM
2R_131854_DEL	3.57e-09	0.0441	XLOC_011704	2RHet	1921599	1921599	1923490	1.57e-08	0.0493	DOC4_DM
2R_131854_DEL	2.97e-07	0.0494	XLOC_011705	2RHet	1924263	1924263	1926950	1.57e-08	0.0493	DOC4_DM
2R_131854_DEL	2.72e-14	0.0482	XLOC_011789	2RHet	3215567	3215567	3217239	1.57e-08	0.0493	DOC4_DM
2R_131854_DEL	8.27e-10	0.0482	XLOC_012081	2RHet	3151739	3149849	3151739	1.57e-08	0.0493	DOC4_DM
2R_132089_INS	3.55e-13	0.045	FBgn0046706	2RHet	3199376	3199376	3234607	1.7e-06	0.0493	DOC4_DM
2R_132089_INS	1.2e-06	0.0499	XLOC_008884	2R	264145	262676	264145	1.7e-06	0.0493	DOC4_DM
2R_132089_INS	1.62e-09	0.0441	XLOC_011704	2RHet	1921599	1921599	1923490	1.7e-06	0.0493	DOC4_DM
2R_132089_INS	1.5e-06	0.0494	XLOC_011705	2RHet	1924263	1924263	1926950	1.7e-06	0.0493	DOC4_DM
2R_132089_INS	4.61e-11	0.0482	XLOC_011789	2RHet	3215567	3215567	3217239	1.7e-06	0.0493	DOC4_DM
2R_132089_INS	1.43e-08	0.0482	XLOC_012081	2RHet	3151739	3149849	3151739	1.7e-06	0.0493	DOC4_DM
2R_132092_SNP	2.87e-13	0.045	FBgn0046706	2RHet	3199376	3199376	3234607	7.8e-07	0.0493	DOC4_DM
2R_132092_SNP	1.12e-06	0.0499	XLOC_008884	2R	264145	262676	264145	7.8e-07	0.0493	DOC4_DM
2R_132092_SNP	1.67e-06	0.0499	XLOC_008927	2R	565520	563804	565520	7.8e-07	0.0493	DOC4_DM
2R_132092_SNP	1.13e-09	0.0441	XLOC_011704	2RHet	1921599	1921599	1923490	7.8e-07	0.0493	DOC4_DM
2R_132092_SNP	2.48e-06	0.0494	XLOC_011705	2RHet	1924263	1924263	1926950	7.8e-07	0.0493	DOC4_DM
2R_132092_SNP	2.3e-14	0.0482	XLOC_011789	2RHet	3215567	3215567	3217239	7.8e-07	0.0493	DOC4_DM
2R_132092_SNP	1.55e-09	0.0482	XLOC_012081	2RHet	3151739	3149849	3151739	7.8e-07	0.0493	DOC4_DM
2R_132270_SNP	8.12e-10	0.0499	XLOC_006282	2R	78321	78321	108264	6.11e-07	0.0486	ACCORD2_I
2R_132270_SNP	5.35e-06	0.0486	XLOC_011942	2RHet	1262608	1258487	1262608	6.11e-07	0.0486	ACCORD2_I
2R_132566_SNP	6.67e-06	0.0491	FBgn0032997	2R	506535	506535	508338	2.98e-07	0.0486	ACCORD2_I
2R_132566_SNP	3.23e-10	0.0499	XLOC_006282	2R	78321	78321	108264	2.98e-07	0.0486	ACCORD2_I
2R_132566_SNP	3.99e-06	0.0486	XLOC_011942	2RHet	1262608	1258487	1262608	2.98e-07	0.0486	ACCORD2_I
2R_132998_SNP	9.1e-13	0.045	FBgn0046706	2RHet	3199376	3199376	3234607	1.36e-08	0.0493	DOC4_DM
2R_132998_SNP	8.43e-08	0.0499	XLOC_008884	2R	264145	262676	264145	1.36e-08	0.0493	DOC4_DM
2R_132998_SNP	5.7e-07	0.0499	XLOC_008927	2R	565520	563804	565520	1.36e-08	0.0493	DOC4_DM
2R_132998_SNP	1.54e-08	0.0441	XLOC_011704	2RHet	1921599	1921599	1923490	1.36e-08	0.0493	DOC4_DM
2R_132998_SNP	6.69e-09	0.0494	XLOC_011705	2RHet	1924263	1924263	1926950	1.36e-08	0.0493	DOC4_DM
2R_132998_SNP	3.19e-13	0.0482	XLOC_011789	2RHet	3215567	3215567	3217239	1.36e-08	0.0493	DOC4_DM
2R_132998_SNP	5.09e-10	0.0482	XLOC_012081	2RHet	3151739	3149849	3151739	1.36e-08	0.0493	DOC4_DM
2R_135354_SNP	1.16e-11	0.045	FBgn0046706	2RHet	3199376	3199376	3234607	5.9e-08	0.0493	DOC4_DM
2R_135354_SNP	8.84e-08	0.0499	XLOC_008884	2R	264145	262676	264145	5.9e-08	0.0493	DOC4_DM
2R_135354_SNP	8.18e-08	0.0441	XLOC_011704	2RHet	1921599	1921599	1923490	5.9e-08	0.0493	DOC4_DM
2R_135354_SNP	6.89e-07	0.0494	XLOC_011705	2RHet	1924263	1924263	1926950	5.9e-08	0.0493	DOC4_DM
2R_135354_SNP	1.38e-12	0.0482	XLOC_011789	2RHet	3215567	3215567	3217239	5.9e-08	0.0493	DOC4_DM
2R_135354_SNP	5.16e-09	0.0482	XLOC_012081	2RHet	3151739	3149849	3151739	5.9e-08	0.0493	DOC4_DM
2R_139500_SNP	2.65e-16	0.045	FBgn0046706	2RHet	3199376	3199376	3234607	4.5e-10	0.0493	DOC4_DM
2R_139500_SNP	4.19e-10	0.0499	XLOC_008884	2R	264145	262676	264145	4.5e-10	0.0493	DOC4_DM
2R_139500_SNP	9.85e-10	0.0441	XLOC_011704	2RHet	1921599	1921599	1923490	4.5e-10	0.0493	DOC4_DM
2R_139500_SNP	5e-08	0.0494	XLOC_011705	2RHet	1924263	1924263	1926950	4.5e-10	0.0493	DOC4_DM
2R_139500_SNP	1.94e-14	0.0482	XLOC_011789	2RHet	3215567	3215567	3217239	4.5e-10	0.0493	DOC4_DM
2R_139500_SNP	1.08e-08	0.0482	XLOC_012081	2RHet	3151739	3149849	3151739	4.5e-10	0.0493	DOC4_DM
2R_140251_SNP	2.18e-18	0.045	FBgn0046706	2RHet	3199376	3199376	3234607	5.58e-11	0.0493	DOC4_DM
2R_140251_SNP	1.5e-10	0.0499	XLOC_008884	2R	264145	262676	264145	5.58e-11	0.0493	DOC4_DM
2R_140251_SNP	9.56e-13	0.0441	XLOC_011704	2RHet	1921599	1921599	1923490	5.58e-11	0.0493	DOC4_DM
2R_140251_SNP	5.11e-11	0.0494	XLOC_011705	2RHet	1924263	1924263	1926950	5.58e-11	0.0493	DOC4_DM
2R_140251_SNP	3.58e-18	0.0482	XLOC_011789	2RHet	3215567	3215567	3217239	5.58e-11	0.0493	DOC4_DM
2R_140251_SNP	6.38e-13	0.0482	XLOC_012081	2RHet	3151739	3149849	3151739	5.58e-11	0.0493	DOC4_DM
2R_140258_SNP	2.32e-15	0.045	FBgn0046706	2RHet	3199376	3199376	3234607	1.26e-10	0.0493	DOC4_DM
2R_140258_SNP	1.66e-09	0.0499	XLOC_008884	2R	264145	262676	264145	1.26e-10	0.0493	DOC4_DM
2R_140258_SNP	3.24e-11	0.0441	XLOC_011704	2RHet	1921599	1921599	1923490	1.26e-10	0.0493	DOC4_DM
2R_140258_SNP	1.45e-10	0.0494	XLOC_011705	2RHet	1924263	1924263	1926950	1.26e-10	0.0493	DOC4_DM
2R_140258_SNP	4.73e-15	0.0482	XLOC_011789	2RHet	3215567	3215567	3217239	1.26e-10	0.0493	DOC4_DM
2R_140258_SNP	3.06e-11	0.0482	XLOC_012081	2RHet	3151739	3149849	3151739	1.26e-10	0.0493	DOC4_DM
2R_146082_SNP	5.38e-09	0.0499	XLOC_006282	2R	78321	78321	108264	1.98e-10	0.0486	ACCORD2_I
2R_146082_SNP	7.62e-06	0.045	XLOC_011651	2RHet	861402	861402	862533	1.98e-10	0.0486	ACCORD2_I
2R_146082_SNP	2.85e-07	0.0486	XLOC_011942	2RHet	1262608	1258487	1262608	1.98e-10	0.0486	ACCORD2_I
2R_147935_SNP	7.95e-15	0.045	FBgn0046706	2RHet	3199376	3199376	3234607	1.22e-10	0.0493	DOC4_DM
2R_147935_SNP	2.77e-09	0.0499	XLOC_008884	2R	264145	262676	264145	1.22e-10	0.0493	DOC4_DM
2R_147935_SNP	1.25e-07	0.0499	XLOC_008927	2R	565520	563804	565520	1.22e-10	0.0493	DOC4_DM
2R_147935_SNP	2.71e-10	0.0441	XLOC_011704	2RHet	1921599	1921599	1923490	1.22e-10	0.0493	DOC4_DM
2R_147935_SNP	9.05e-09	0.0494	XLOC_011705	2RHet	1924263	1924263	1926950	1.22e-10	0.0493	DOC4_DM
2R_147935_SNP	4.75e-15	0.0482	XLOC_011789	2RHet	3215567	3215567	3217239	1.22e-10	0.0493	DOC4_DM
2R_147935_SNP	5.11e-11	0.0482	XLOC_012081	2RHet	3151739	3149849	3151739	1.22e-10	0.0493	DOC4_DM
2R_148497_SNP	1.91e-12	0.045	FBgn0046706	2RHet	3199376	3199376	3234607	4.34e-09	0.0493	DOC4_DM
2R_148497_SNP	4.63e-08	0.0499	XLOC_008884	2R	264145	262676	264145	4.34e-09	0.0493	DOC4_DM
2R_148497_SNP	7.5e-09	0.0441	XLOC_011704	2RHet	1921599	1921599	1923490	4.34e-09	0.0493	DOC4_DM
2R_148497_SNP	2.38e-07	0.0494	XLOC_011705	2RHet	1924263	1924263	1926950	4.34e-09	0.0493	DOC4_DM
2R_148497_SNP	3.83e-14	0.0482	XLOC_011789	2RHet	3215567	3215567	3217239	4.34e-09	0.0493	DOC4_DM
2R_148497_SNP	7.29e-11	0.0482	XLOC_012081	2RHet	3151739	3149849	3151739	4.34e-09	0.0493	DOC4_DM
2R_149041_INS	8.01e-19	0.045	FBgn0046706	2RHet	3199376	3199376	3234607	5.42e-14	0.0493	DOC4_DM
2R_149041_INS	1.08e-13	0.0499	XLOC_008884	2R	264145	262676	264145	5.42e-14	0.0493	DOC4_DM
2R_149041_INS	1.33e-14	0.0441	XLOC_011704	2RHet	1921599	1921599	1923490	5.42e-14	0.0493	DOC4_DM
2R_149041_INS	6.38e-13	0.0494	XLOC_011705	2RHet	1924263	1924263	1926950	5.42e-14	0.0493	DOC4_DM
2R_149041_INS	3.88e-17	0.0482	XLOC_011789	2RHet	3215567	3215567	3217239	5.42e-14	0.0493	DOC4_DM
2R_149041_INS	4.13e-12	0.0499	XLOC_011977	2RHet	1591609	1590552	1591609	5.42e-14	0.0493	DOC4_DM
2R_149041_INS	2.11e-14	0.0482	XLOC_012081	2RHet	3151739	3149849	3151739	5.42e-14	0.0493	DOC4_DM
2R_149046_SNP	1.41e-15	0.045	FBgn0046706	2RHet	3199376	3199376	3234607	7.13e-08	0.0491	INVADER1_I
2R_149046_SNP	1.41e-15	0.045	FBgn0046706	2RHet	3199376	3199376	3234607	3.37e-14	0.0493	DOC4_DM
2R_149046_SNP	1.06e-12	0.0499	XLOC_008884	2R	264145	262676	264145	7.13e-08	0.0491	INVADER1_I
2R_149046_SNP	1.06e-12	0.0499	XLOC_008884	2R	264145	262676	264145	3.37e-14	0.0493	DOC4_DM
2R_149046_SNP	1.79e-11	0.0441	XLOC_011704	2RHet	1921599	1921599	1923490	3.37e-14	0.0493	DOC4_DM
2R_149046_SNP	1.79e-11	0.0441	XLOC_011704	2RHet	1921599	1921599	1923490	7.13e-08	0.0491	INVADER1_I
2R_149046_SNP	2.9e-11	0.0494	XLOC_011705	2RHet	1924263	1924263	1926950	3.37e-14	0.0493	DOC4_DM
2R_149046_SNP	2.9e-11	0.0494	XLOC_011705	2RHet	1924263	1924263	1926950	7.13e-08	0.0491	INVADER1_I
2R_149046_SNP	2.34e-14	0.0482	XLOC_011789	2RHet	3215567	3215567	3217239	7.13e-08	0.0491	INVADER1_I
2R_149046_SNP	2.34e-14	0.0482	XLOC_011789	2RHet	3215567	3215567	3217239	3.37e-14	0.0493	DOC4_DM
2R_149046_SNP	3.73e-09	0.0499	XLOC_011977	2RHet	1591609	1590552	1591609	7.13e-08	0.0491	INVADER1_I
2R_149046_SNP	3.73e-09	0.0499	XLOC_011977	2RHet	1591609	1590552	1591609	3.37e-14	0.0493	DOC4_DM
2R_149046_SNP	1.49e-11	0.0482	XLOC_012081	2RHet	3151739	3149849	3151739	7.13e-08	0.0491	INVADER1_I
2R_149046_SNP	1.49e-11	0.0482	XLOC_012081	2RHet	3151739	3149849	3151739	3.37e-14	0.0493	DOC4_DM
2R_157982_SNP	1.71e-15	0.045	FBgn0046706	2RHet	3199376	3199376	3234607	1.51e-07	0.0493	DOC4_DM
2R_157982_SNP	2.53e-09	0.0499	XLOC_008884	2R	264145	262676	264145	1.51e-07	0.0493	DOC4_DM
2R_157982_SNP	2.34e-09	0.0441	XLOC_011704	2RHet	1921599	1921599	1923490	1.51e-07	0.0493	DOC4_DM
2R_157982_SNP	1.16e-08	0.0494	XLOC_011705	2RHet	1924263	1924263	1926950	1.51e-07	0.0493	DOC4_DM
2R_157982_SNP	8.85e-11	0.0482	XLOC_011789	2RHet	3215567	3215567	3217239	1.51e-07	0.0493	DOC4_DM
2R_157982_SNP	1.65e-06	0.0499	XLOC_011977	2RHet	1591609	1590552	1591609	1.51e-07	0.0493	DOC4_DM
2R_157982_SNP	1.03e-07	0.0482	XLOC_012081	2RHet	3151739	3149849	3151739	1.51e-07	0.0493	DOC4_DM
2R_167645_DEL	2.33e-10	0.045	FBgn0046706	2RHet	3199376	3199376	3234607	1.45e-06	0.0493	DOC4_DM
2R_167645_DEL	6.51e-10	0.0499	XLOC_008884	2R	264145	262676	264145	1.45e-06	0.0493	DOC4_DM
2R_167645_DEL	2.06e-09	0.0441	XLOC_011704	2RHet	1921599	1921599	1923490	1.45e-06	0.0493	DOC4_DM
2R_167645_DEL	1.23e-07	0.0494	XLOC_011705	2RHet	1924263	1924263	1926950	1.45e-06	0.0493	DOC4_DM
2R_167645_DEL	1.62e-10	0.0482	XLOC_011789	2RHet	3215567	3215567	3217239	1.45e-06	0.0493	DOC4_DM
2R_167645_DEL	1.75e-08	0.0482	XLOC_012081	2RHet	3151739	3149849	3151739	1.45e-06	0.0493	DOC4_DM
2R_16776_SNP	2.57e-18	0.045	FBgn0046706	2RHet	3199376	3199376	3234607	6.29e-13	0.0493	DOC4_DM
2R_16776_SNP	6.55e-08	0.0472	XLOC_008881	2R	250706	249434	250706	6.29e-13	0.0493	DOC4_DM
2R_16776_SNP	9.04e-14	0.0499	XLOC_008884	2R	264145	262676	264145	6.29e-13	0.0493	DOC4_DM
2R_16776_SNP	1.65e-15	0.0441	XLOC_011704	2RHet	1921599	1921599	1923490	6.29e-13	0.0493	DOC4_DM
2R_16776_SNP	2.38e-15	0.0494	XLOC_011705	2RHet	1924263	1924263	1926950	6.29e-13	0.0493	DOC4_DM
2R_16776_SNP	1.69e-16	0.0482	XLOC_011789	2RHet	3215567	3215567	3217239	6.29e-13	0.0493	DOC4_DM
2R_16776_SNP	2.1e-09	0.0499	XLOC_011977	2RHet	1591609	1590552	1591609	6.29e-13	0.0493	DOC4_DM
2R_16776_SNP	6.6e-16	0.0482	XLOC_012081	2RHet	3151739	3149849	3151739	6.29e-13	0.0493	DOC4_DM
2R_17539_SNP	6.77e-13	0.045	FBgn0046706	2RHet	3199376	3199376	3234607	1.98e-08	0.0493	DOC4_DM
2R_17539_SNP	1.13e-07	0.0499	XLOC_008884	2R	264145	262676	264145	1.98e-08	0.0493	DOC4_DM
2R_17539_SNP	9.28e-10	0.0441	XLOC_011704	2RHet	1921599	1921599	1923490	1.98e-08	0.0493	DOC4_DM
2R_17539_SNP	1.77e-08	0.0494	XLOC_011705	2RHet	1924263	1924263	1926950	1.98e-08	0.0493	DOC4_DM
2R_17539_SNP	1.39e-10	0.0482	XLOC_011789	2RHet	3215567	3215567	3217239	1.98e-08	0.0493	DOC4_DM
2R_17539_SNP	2.03e-10	0.0482	XLOC_012081	2RHet	3151739	3149849	3151739	1.98e-08	0.0493	DOC4_DM
2R_175487_SNP	7.33e-09	0.045	FBgn0046706	2RHet	3199376	3199376	3234607	8.57e-08	0.0493	DOC4_DM
2R_175487_SNP	2.79e-06	0.0441	XLOC_011704	2RHet	1921599	1921599	1923490	8.57e-08	0.0493	DOC4_DM
2R_175487_SNP	1.58e-08	0.0482	XLOC_011789	2RHet	3215567	3215567	3217239	8.57e-08	0.0493	DOC4_DM
2R_17872_SNP	2.11e-07	0.0495	XLOC_006268	2R	21910	21910	24748	3.38e-09	0.0486	ACCORD2_I
2R_17872_SNP	1.03e-11	0.0499	XLOC_006282	2R	78321	78321	108264	3.38e-09	0.0486	ACCORD2_I
2R_17872_SNP	3.76e-07	0.045	XLOC_011651	2RHet	861402	861402	862533	3.38e-09	0.0486	ACCORD2_I
2R_17872_SNP	8.56e-14	0.0486	XLOC_011942	2RHet	1262608	1258487	1262608	3.38e-09	0.0486	ACCORD2_I
2R_17872_SNP	3.01e-09	0.01	XLOC_011946	2RHet	1280979	1278792	1280979	3.38e-09	0.0486	ACCORD2_I
2R_17873_SNP	4.66e-08	0.0495	XLOC_006268	2R	21910	21910	24748	8.38e-10	0.0486	ACCORD2_I
2R_17873_SNP	1.33e-12	0.0499	XLOC_006282	2R	78321	78321	108264	8.38e-10	0.0486	ACCORD2_I
2R_17873_SNP	1.22e-07	0.045	XLOC_011651	2RHet	861402	861402	862533	8.38e-10	0.0486	ACCORD2_I
2R_17873_SNP	3.1e-14	0.0486	XLOC_011942	2RHet	1262608	1258487	1262608	8.38e-10	0.0486	ACCORD2_I
2R_17873_SNP	2.77e-09	0.01	XLOC_011946	2RHet	1280979	1278792	1280979	8.38e-10	0.0486	ACCORD2_I
2R_17943_SNP	4.43e-07	0.0495	XLOC_006268	2R	21910	21910	24748	2.42e-08	0.0486	ACCORD2_I
2R_17943_SNP	3.35e-11	0.0499	XLOC_006282	2R	78321	78321	108264	2.42e-08	0.0486	ACCORD2_I
2R_17943_SNP	2.29e-06	0.045	XLOC_011651	2RHet	861402	861402	862533	2.42e-08	0.0486	ACCORD2_I
2R_17943_SNP	5.35e-11	0.0486	XLOC_011942	2RHet	1262608	1258487	1262608	2.42e-08	0.0486	ACCORD2_I
2R_18046_SNP	3.85e-19	0.045	FBgn0046706	2RHet	3199376	3199376	3234607	1.31e-13	0.0493	DOC4_DM
2R_18046_SNP	8.14e-08	0.0472	XLOC_008881	2R	250706	249434	250706	1.31e-13	0.0493	DOC4_DM
2R_18046_SNP	1.19e-12	0.0499	XLOC_008884	2R	264145	262676	264145	1.31e-13	0.0493	DOC4_DM
2R_18046_SNP	1.98e-15	0.0441	XLOC_011704	2RHet	1921599	1921599	1923490	1.31e-13	0.0493	DOC4_DM
2R_18046_SNP	3.8e-15	0.0494	XLOC_011705	2RHet	1924263	1924263	1926950	1.31e-13	0.0493	DOC4_DM
2R_18046_SNP	1.23e-16	0.0482	XLOC_011789	2RHet	3215567	3215567	3217239	1.31e-13	0.0493	DOC4_DM
2R_18046_SNP	1.79e-09	0.0499	XLOC_011977	2RHet	1591609	1590552	1591609	1.31e-13	0.0493	DOC4_DM
2R_18046_SNP	4.2e-14	0.0482	XLOC_012081	2RHet	3151739	3149849	3151739	1.31e-13	0.0493	DOC4_DM
2R_181318_SNP	2.82e-11	0.045	FBgn0046706	2RHet	3199376	3199376	3234607	2.93e-07	0.0493	DOC4_DM
2R_181318_SNP	6.03e-09	0.0499	XLOC_008884	2R	264145	262676	264145	2.93e-07	0.0493	DOC4_DM
2R_181318_SNP	1.38e-08	0.0441	XLOC_011704	2RHet	1921599	1921599	1923490	2.93e-07	0.0493	DOC4_DM
2R_181318_SNP	3.88e-08	0.0494	XLOC_011705	2RHet	1924263	1924263	1926950	2.93e-07	0.0493	DOC4_DM
2R_181318_SNP	9.74e-12	0.0482	XLOC_011789	2RHet	3215567	3215567	3217239	2.93e-07	0.0493	DOC4_DM
2R_181318_SNP	1.55e-09	0.0482	XLOC_012081	2RHet	3151739	3149849	3151739	2.93e-07	0.0493	DOC4_DM
2R_18542_SNP	1.75e-20	0.045	FBgn0046706	2RHet	3199376	3199376	3234607	3.13e-14	0.0493	DOC4_DM
2R_18542_SNP	1.54e-08	0.0472	XLOC_008881	2R	250706	249434	250706	3.13e-14	0.0493	DOC4_DM
2R_18542_SNP	8.94e-15	0.0499	XLOC_008884	2R	264145	262676	264145	3.13e-14	0.0493	DOC4_DM
2R_18542_SNP	4.72e-16	0.0441	XLOC_011704	2RHet	1921599	1921599	1923490	3.13e-14	0.0493	DOC4_DM
2R_18542_SNP	9.19e-15	0.0494	XLOC_011705	2RHet	1924263	1924263	1926950	3.13e-14	0.0493	DOC4_DM
2R_18542_SNP	6.3e-18	0.0482	XLOC_011789	2RHet	3215567	3215567	3217239	3.13e-14	0.0493	DOC4_DM
2R_18542_SNP	2.14e-10	0.0499	XLOC_011977	2RHet	1591609	1590552	1591609	3.13e-14	0.0493	DOC4_DM
2R_18542_SNP	1.78e-15	0.0482	XLOC_012081	2RHet	3151739	3149849	3151739	3.13e-14	0.0493	DOC4_DM
2R_197237_SNP	4.4e-10	0.045	FBgn0046706	2RHet	3199376	3199376	3234607	3.11e-06	0.0493	DOC4_DM
2R_197237_SNP	1.13e-08	0.0499	XLOC_008884	2R	264145	262676	264145	3.11e-06	0.0493	DOC4_DM
2R_197237_SNP	1.56e-15	0.0482	XLOC_011789	2RHet	3215567	3215567	3217239	3.11e-06	0.0493	DOC4_DM
2R_197237_SNP	5.2e-07	0.0482	XLOC_012081	2RHet	3151739	3149849	3151739	3.11e-06	0.0493	DOC4_DM
2R_200413_DEL	4.83e-16	0.045	FBgn0046706	2RHet	3199376	3199376	3234607	1.76e-07	0.0491	INVADER1_I
2R_200413_DEL	4.83e-16	0.045	FBgn0046706	2RHet	3199376	3199376	3234607	8.52e-10	0.0493	DOC4_DM
2R_200413_DEL	7.52e-11	0.0499	XLOC_008884	2R	264145	262676	264145	1.76e-07	0.0491	INVADER1_I
2R_200413_DEL	7.52e-11	0.0499	XLOC_008884	2R	264145	262676	264145	8.52e-10	0.0493	DOC4_DM
2R_200413_DEL	4.38e-11	0.0441	XLOC_011704	2RHet	1921599	1921599	1923490	8.52e-10	0.0493	DOC4_DM
2R_200413_DEL	4.38e-11	0.0441	XLOC_011704	2RHet	1921599	1921599	1923490	1.76e-07	0.0491	INVADER1_I
2R_200413_DEL	6.28e-08	0.0494	XLOC_011705	2RHet	1924263	1924263	1926950	8.52e-10	0.0493	DOC4_DM
2R_200413_DEL	6.28e-08	0.0494	XLOC_011705	2RHet	1924263	1924263	1926950	1.76e-07	0.0491	INVADER1_I
2R_200413_DEL	2.12e-16	0.0482	XLOC_011789	2RHet	3215567	3215567	3217239	1.76e-07	0.0491	INVADER1_I
2R_200413_DEL	2.12e-16	0.0482	XLOC_011789	2RHet	3215567	3215567	3217239	8.52e-10	0.0493	DOC4_DM
2R_200413_DEL	2.21e-11	0.0482	XLOC_012081	2RHet	3151739	3149849	3151739	8.52e-10	0.0493	DOC4_DM
2R_200413_DEL	2.21e-11	0.0482	XLOC_012081	2RHet	3151739	3149849	3151739	1.76e-07	0.0491	INVADER1_I
2R_200979_INS	3.09e-11	0.045	FBgn0046706	2RHet	3199376	3199376	3234607	1.37e-09	0.0493	DOC4_DM
2R_200979_INS	3.09e-11	0.045	FBgn0046706	2RHet	3199376	3199376	3234607	3.45e-09	0.0491	INVADER1_I
2R_200979_INS	2.64e-07	0.0499	XLOC_008884	2R	264145	262676	264145	3.45e-09	0.0491	INVADER1_I
2R_200979_INS	2.64e-07	0.0499	XLOC_008884	2R	264145	262676	264145	1.37e-09	0.0493	DOC4_DM
2R_200979_INS	4.24e-09	0.0441	XLOC_011704	2RHet	1921599	1921599	1923490	3.45e-09	0.0491	INVADER1_I
2R_200979_INS	4.24e-09	0.0441	XLOC_011704	2RHet	1921599	1921599	1923490	1.37e-09	0.0493	DOC4_DM
2R_200979_INS	2.4e-07	0.0494	XLOC_011705	2RHet	1924263	1924263	1926950	3.45e-09	0.0491	INVADER1_I
2R_200979_INS	2.4e-07	0.0494	XLOC_011705	2RHet	1924263	1924263	1926950	1.37e-09	0.0493	DOC4_DM
2R_200979_INS	1.38e-11	0.0482	XLOC_011789	2RHet	3215567	3215567	3217239	3.45e-09	0.0491	INVADER1_I
2R_200979_INS	1.38e-11	0.0482	XLOC_011789	2RHet	3215567	3215567	3217239	1.37e-09	0.0493	DOC4_DM
2R_200979_INS	2.95e-07	0.0482	XLOC_012081	2RHet	3151739	3149849	3151739	1.37e-09	0.0493	DOC4_DM
2R_200979_INS	2.95e-07	0.0482	XLOC_012081	2RHet	3151739	3149849	3151739	3.45e-09	0.0491	INVADER1_I
2R_20262_SNP	2.84e-06	0.0495	XLOC_006268	2R	21910	21910	24748	3.76e-09	0.0486	ACCORD2_I
2R_20262_SNP	2.79e-11	0.0499	XLOC_006282	2R	78321	78321	108264	3.76e-09	0.0486	ACCORD2_I
2R_20262_SNP	6.36e-06	0.045	XLOC_011651	2RHet	861402	861402	862533	3.76e-09	0.0486	ACCORD2_I
2R_20262_SNP	6.16e-12	0.0486	XLOC_011942	2RHet	1262608	1258487	1262608	3.76e-09	0.0486	ACCORD2_I
2R_20819_SNP	3.02e-07	0.0495	XLOC_006268	2R	21910	21910	24748	1.72e-09	0.0486	ACCORD2_I
2R_20819_SNP	5.11e-11	0.0499	XLOC_006282	2R	78321	78321	108264	1.72e-09	0.0486	ACCORD2_I
2R_20819_SNP	1.78e-07	0.045	XLOC_011651	2RHet	861402	861402	862533	1.72e-09	0.0486	ACCORD2_I
2R_20819_SNP	4.77e-09	0.0486	XLOC_011942	2RHet	1262608	1258487	1262608	1.72e-09	0.0486	ACCORD2_I
2R_209714_INS	4.51e-11	0.045	FBgn0046706	2RHet	3199376	3199376	3234607	3.3e-06	0.0493	DOC4_DM
2R_209714_INS	2.57e-06	0.0499	XLOC_008884	2R	264145	262676	264145	3.3e-06	0.0493	DOC4_DM
2R_209714_INS	7.1e-07	0.0441	XLOC_011704	2RHet	1921599	1921599	1923490	3.3e-06	0.0493	DOC4_DM
2R_209714_INS	2.85e-11	0.0482	XLOC_011789	2RHet	3215567	3215567	3217239	3.3e-06	0.0493	DOC4_DM
2R_209714_INS	1.02e-06	0.0482	XLOC_012081	2RHet	3151739	3149849	3151739	3.3e-06	0.0493	DOC4_DM
2R_210696_SNP	2.48e-12	0.045	FBgn0046706	2RHet	3199376	3199376	3234607	6.36e-13	0.0493	DOC4_DM
2R_210696_SNP	4.51e-10	0.0499	XLOC_008884	2R	264145	262676	264145	6.36e-13	0.0493	DOC4_DM
2R_210696_SNP	6.46e-10	0.0441	XLOC_011704	2RHet	1921599	1921599	1923490	6.36e-13	0.0493	DOC4_DM
2R_210696_SNP	2.21e-10	0.0494	XLOC_011705	2RHet	1924263	1924263	1926950	6.36e-13	0.0493	DOC4_DM
2R_210696_SNP	2.47e-09	0.0482	XLOC_011789	2RHet	3215567	3215567	3217239	6.36e-13	0.0493	DOC4_DM
2R_210696_SNP	2.89e-09	0.0482	XLOC_012081	2RHet	3151739	3149849	3151739	6.36e-13	0.0493	DOC4_DM
2R_210818_DEL	2.09e-15	0.045	FBgn0046706	2RHet	3199376	3199376	3234607	5.8e-12	0.0493	DOC4_DM
2R_210818_DEL	1.83e-11	0.0499	XLOC_008884	2R	264145	262676	264145	5.8e-12	0.0493	DOC4_DM
2R_210818_DEL	8.16e-12	0.0441	XLOC_011704	2RHet	1921599	1921599	1923490	5.8e-12	0.0493	DOC4_DM
2R_210818_DEL	3.88e-10	0.0494	XLOC_011705	2RHet	1924263	1924263	1926950	5.8e-12	0.0493	DOC4_DM
2R_210818_DEL	1.34e-12	0.0482	XLOC_011789	2RHet	3215567	3215567	3217239	5.8e-12	0.0493	DOC4_DM
2R_210818_DEL	1.42e-07	0.0499	XLOC_011977	2RHet	1591609	1590552	1591609	5.8e-12	0.0493	DOC4_DM
2R_210818_DEL	3.36e-10	0.0482	XLOC_012081	2RHet	3151739	3149849	3151739	5.8e-12	0.0493	DOC4_DM
2R_2123882_SNP	1.87e-07	0.0491	XLOC_006571	2R	2444704	2444704	2447851	2.04e-06	0.0484	INVADER3_I
2R_21373_SNP	4.96e-07	0.0492	FBgn0085732	2RHet	337700	337700	340299	3.09e-09	0.0486	ACCORD2_I
2R_21373_SNP	4.68e-09	0.0499	XLOC_006282	2R	78321	78321	108264	3.09e-09	0.0486	ACCORD2_I
2R_21373_SNP	4.41e-07	0.045	XLOC_011651	2RHet	861402	861402	862533	3.09e-09	0.0486	ACCORD2_I
2R_21373_SNP	3.15e-08	0.0486	XLOC_011942	2RHet	1262608	1258487	1262608	3.09e-09	0.0486	ACCORD2_I
2R_217112_DEL	7.13e-18	0.045	FBgn0046706	2RHet	3199376	3199376	3234607	8.77e-13	0.0493	DOC4_DM
2R_217112_DEL	7.13e-18	0.045	FBgn0046706	2RHet	3199376	3199376	3234607	7.01e-08	0.0491	INVADER1_I
2R_217112_DEL	4.1e-14	0.0499	XLOC_008884	2R	264145	262676	264145	7.01e-08	0.0491	INVADER1_I
2R_217112_DEL	4.1e-14	0.0499	XLOC_008884	2R	264145	262676	264145	8.77e-13	0.0493	DOC4_DM
2R_217112_DEL	4.74e-13	0.0441	XLOC_011704	2RHet	1921599	1921599	1923490	8.77e-13	0.0493	DOC4_DM
2R_217112_DEL	4.74e-13	0.0441	XLOC_011704	2RHet	1921599	1921599	1923490	7.01e-08	0.0491	INVADER1_I
2R_217112_DEL	6.2e-11	0.0494	XLOC_011705	2RHet	1924263	1924263	1926950	7.01e-08	0.0491	INVADER1_I
2R_217112_DEL	6.2e-11	0.0494	XLOC_011705	2RHet	1924263	1924263	1926950	8.77e-13	0.0493	DOC4_DM
2R_217112_DEL	3.2e-16	0.0482	XLOC_011789	2RHet	3215567	3215567	3217239	7.01e-08	0.0491	INVADER1_I
2R_217112_DEL	3.2e-16	0.0482	XLOC_011789	2RHet	3215567	3215567	3217239	8.77e-13	0.0493	DOC4_DM
2R_217112_DEL	2.63e-10	0.0499	XLOC_011977	2RHet	1591609	1590552	1591609	7.01e-08	0.0491	INVADER1_I
2R_217112_DEL	2.63e-10	0.0499	XLOC_011977	2RHet	1591609	1590552	1591609	8.77e-13	0.0493	DOC4_DM
2R_217112_DEL	5.49e-12	0.0482	XLOC_012081	2RHet	3151739	3149849	3151739	7.01e-08	0.0491	INVADER1_I
2R_217112_DEL	5.49e-12	0.0482	XLOC_012081	2RHet	3151739	3149849	3151739	8.77e-13	0.0493	DOC4_DM
2R_223150_SNP	2.76e-18	0.045	FBgn0046706	2RHet	3199376	3199376	3234607	5.68e-15	0.0493	DOC4_DM
2R_223150_SNP	6.46e-14	0.0499	XLOC_008884	2R	264145	262676	264145	5.68e-15	0.0493	DOC4_DM
2R_223150_SNP	3.44e-14	0.0441	XLOC_011704	2RHet	1921599	1921599	1923490	5.68e-15	0.0493	DOC4_DM
2R_223150_SNP	2.43e-14	0.0494	XLOC_011705	2RHet	1924263	1924263	1926950	5.68e-15	0.0493	DOC4_DM
2R_223150_SNP	1.84e-15	0.0482	XLOC_011789	2RHet	3215567	3215567	3217239	5.68e-15	0.0493	DOC4_DM
2R_223150_SNP	8.81e-12	0.0499	XLOC_011977	2RHet	1591609	1590552	1591609	5.68e-15	0.0493	DOC4_DM
2R_223150_SNP	6.07e-13	0.0482	XLOC_012081	2RHet	3151739	3149849	3151739	5.68e-15	0.0493	DOC4_DM
2R_224096_SNP	1.27e-16	0.045	FBgn0046706	2RHet	3199376	3199376	3234607	5.99e-14	0.0493	DOC4_DM
2R_224096_SNP	5.54e-13	0.0499	XLOC_008884	2R	264145	262676	264145	5.99e-14	0.0493	DOC4_DM
2R_224096_SNP	4.81e-13	0.0441	XLOC_011704	2RHet	1921599	1921599	1923490	5.99e-14	0.0493	DOC4_DM
2R_224096_SNP	1.02e-13	0.0494	XLOC_011705	2RHet	1924263	1924263	1926950	5.99e-14	0.0493	DOC4_DM
2R_224096_SNP	1.18e-15	0.0482	XLOC_011789	2RHet	3215567	3215567	3217239	5.99e-14	0.0493	DOC4_DM
2R_224096_SNP	9.57e-10	0.0499	XLOC_011977	2RHet	1591609	1590552	1591609	5.99e-14	0.0493	DOC4_DM
2R_224096_SNP	4.93e-11	0.0482	XLOC_012081	2RHet	3151739	3149849	3151739	5.99e-14	0.0493	DOC4_DM
2R_224721_SNP	2.58e-11	0.045	FBgn0046706	2RHet	3199376	3199376	3234607	1.03e-07	0.0493	DOC4_DM
2R_224721_SNP	2.21e-06	0.0499	XLOC_008884	2R	264145	262676	264145	1.03e-07	0.0493	DOC4_DM
2R_224721_SNP	1.54e-08	0.0441	XLOC_011704	2RHet	1921599	1921599	1923490	1.03e-07	0.0493	DOC4_DM
2R_224721_SNP	5.98e-07	0.0494	XLOC_011705	2RHet	1924263	1924263	1926950	1.03e-07	0.0493	DOC4_DM
2R_224721_SNP	2.96e-12	0.0482	XLOC_011789	2RHet	3215567	3215567	3217239	1.03e-07	0.0493	DOC4_DM
2R_224721_SNP	6.94e-09	0.0482	XLOC_012081	2RHet	3151739	3149849	3151739	1.03e-07	0.0493	DOC4_DM
2R_224789_SNP	9.05e-16	0.045	FBgn0046706	2RHet	3199376	3199376	3234607	1.92e-10	0.0493	DOC4_DM
2R_224789_SNP	8.3e-10	0.0499	XLOC_008884	2R	264145	262676	264145	1.92e-10	0.0493	DOC4_DM
2R_224789_SNP	6.47e-11	0.0441	XLOC_011704	2RHet	1921599	1921599	1923490	1.92e-10	0.0493	DOC4_DM
2R_224789_SNP	2.7e-09	0.0494	XLOC_011705	2RHet	1924263	1924263	1926950	1.92e-10	0.0493	DOC4_DM
2R_224789_SNP	6.55e-16	0.0482	XLOC_011789	2RHet	3215567	3215567	3217239	1.92e-10	0.0493	DOC4_DM
2R_224789_SNP	1.95e-11	0.0482	XLOC_012081	2RHet	3151739	3149849	3151739	1.92e-10	0.0493	DOC4_DM
2R_224814_SNP	9.15e-18	0.045	FBgn0046706	2RHet	3199376	3199376	3234607	2.19e-10	0.0493	DOC4_DM
2R_224814_SNP	7.9e-10	0.0499	XLOC_008884	2R	264145	262676	264145	2.19e-10	0.0493	DOC4_DM
2R_224814_SNP	6.26e-12	0.0441	XLOC_011704	2RHet	1921599	1921599	1923490	2.19e-10	0.0493	DOC4_DM
2R_224814_SNP	3.39e-10	0.0494	XLOC_011705	2RHet	1924263	1924263	1926950	2.19e-10	0.0493	DOC4_DM
2R_224814_SNP	3.52e-18	0.0482	XLOC_011789	2RHet	3215567	3215567	3217239	2.19e-10	0.0493	DOC4_DM
2R_224814_SNP	3.38e-12	0.0482	XLOC_012081	2RHet	3151739	3149849	3151739	2.19e-10	0.0493	DOC4_DM
2R_22557_SNP	1.29e-20	0.045	FBgn0046706	2RHet	3199376	3199376	3234607	3.34e-14	0.0493	DOC4_DM
2R_22557_SNP	1.45e-08	0.0472	XLOC_008881	2R	250706	249434	250706	3.34e-14	0.0493	DOC4_DM
2R_22557_SNP	5.48e-14	0.0499	XLOC_008884	2R	264145	262676	264145	3.34e-14	0.0493	DOC4_DM
2R_22557_SNP	4.17e-16	0.0441	XLOC_011704	2RHet	1921599	1921599	1923490	3.34e-14	0.0493	DOC4_DM
2R_22557_SNP	8.19e-15	0.0494	XLOC_011705	2RHet	1924263	1924263	1926950	3.34e-14	0.0493	DOC4_DM
2R_22557_SNP	3.89e-18	0.0482	XLOC_011789	2RHet	3215567	3215567	3217239	3.34e-14	0.0493	DOC4_DM
2R_22557_SNP	2.06e-10	0.0499	XLOC_011977	2RHet	1591609	1590552	1591609	3.34e-14	0.0493	DOC4_DM
2R_22557_SNP	1.44e-15	0.0482	XLOC_012081	2RHet	3151739	3149849	3151739	3.34e-14	0.0493	DOC4_DM
2R_227036_SNP	2.41e-12	0.045	FBgn0046706	2RHet	3199376	3199376	3234607	1.52e-07	0.0493	DOC4_DM
2R_227036_SNP	1.23e-10	0.0499	XLOC_008884	2R	264145	262676	264145	1.52e-07	0.0493	DOC4_DM
2R_227036_SNP	6.71e-08	0.0441	XLOC_011704	2RHet	1921599	1921599	1923490	1.52e-07	0.0493	DOC4_DM
2R_227036_SNP	1.05e-06	0.0494	XLOC_011705	2RHet	1924263	1924263	1926950	1.52e-07	0.0493	DOC4_DM
2R_227036_SNP	1.39e-11	0.0482	XLOC_011789	2RHet	3215567	3215567	3217239	1.52e-07	0.0493	DOC4_DM
2R_227036_SNP	3.19e-09	0.0482	XLOC_012081	2RHet	3151739	3149849	3151739	1.52e-07	0.0493	DOC4_DM
2R_231247_SNP	2.28e-12	0.045	FBgn0046706	2RHet	3199376	3199376	3234607	9.96e-08	0.0493	DOC4_DM
2R_231247_SNP	6.61e-09	0.0499	XLOC_008884	2R	264145	262676	264145	9.96e-08	0.0493	DOC4_DM
2R_231247_SNP	3.2e-08	0.0441	XLOC_011704	2RHet	1921599	1921599	1923490	9.96e-08	0.0493	DOC4_DM
2R_231247_SNP	1.72e-07	0.0494	XLOC_011705	2RHet	1924263	1924263	1926950	9.96e-08	0.0493	DOC4_DM
2R_231247_SNP	5.52e-12	0.0482	XLOC_011789	2RHet	3215567	3215567	3217239	9.96e-08	0.0493	DOC4_DM
2R_231247_SNP	7.25e-09	0.0482	XLOC_012081	2RHet	3151739	3149849	3151739	9.96e-08	0.0493	DOC4_DM
2R_231793_SNP	1.86e-12	0.045	FBgn0046706	2RHet	3199376	3199376	3234607	1.48e-07	0.0493	DOC4_DM
2R_231793_SNP	1.25e-10	0.0499	XLOC_008884	2R	264145	262676	264145	1.48e-07	0.0493	DOC4_DM
2R_231793_SNP	4.83e-08	0.0441	XLOC_011704	2RHet	1921599	1921599	1923490	1.48e-07	0.0493	DOC4_DM
2R_231793_SNP	8.64e-07	0.0494	XLOC_011705	2RHet	1924263	1924263	1926950	1.48e-07	0.0493	DOC4_DM
2R_231793_SNP	1.65e-11	0.0482	XLOC_011789	2RHet	3215567	3215567	3217239	1.48e-07	0.0493	DOC4_DM
2R_231793_SNP	3.55e-09	0.0482	XLOC_012081	2RHet	3151739	3149849	3151739	1.48e-07	0.0493	DOC4_DM
2R_232651_INS	1.36e-13	0.045	FBgn0046706	2RHet	3199376	3199376	3234607	1.27e-07	0.0493	DOC4_DM
2R_232651_INS	8.27e-11	0.0499	XLOC_008884	2R	264145	262676	264145	1.27e-07	0.0493	DOC4_DM
2R_232651_INS	2.82e-09	0.0441	XLOC_011704	2RHet	1921599	1921599	1923490	1.27e-07	0.0493	DOC4_DM
2R_232651_INS	1.54e-11	0.0482	XLOC_011789	2RHet	3215567	3215567	3217239	1.27e-07	0.0493	DOC4_DM
2R_232651_INS	1.26e-08	0.0482	XLOC_012081	2RHet	3151739	3149849	3151739	1.27e-07	0.0493	DOC4_DM
2R_233325_SNP	3.47e-13	0.045	FBgn0046706	2RHet	3199376	3199376	3234607	7.85e-13	0.0493	DOC4_DM
2R_233325_SNP	2.04e-11	0.0499	XLOC_008884	2R	264145	262676	264145	7.85e-13	0.0493	DOC4_DM
2R_233325_SNP	3.38e-11	0.0441	XLOC_011704	2RHet	1921599	1921599	1923490	7.85e-13	0.0493	DOC4_DM
2R_233325_SNP	1.09e-10	0.0494	XLOC_011705	2RHet	1924263	1924263	1926950	7.85e-13	0.0493	DOC4_DM
2R_233325_SNP	8.58e-14	0.0482	XLOC_011789	2RHet	3215567	3215567	3217239	7.85e-13	0.0493	DOC4_DM
2R_233325_SNP	1.64e-07	0.0499	XLOC_011977	2RHet	1591609	1590552	1591609	7.85e-13	0.0493	DOC4_DM
2R_233325_SNP	8.87e-12	0.0482	XLOC_012081	2RHet	3151739	3149849	3151739	7.85e-13	0.0493	DOC4_DM
2R_233990_SNP	4.12e-10	0.045	FBgn0046706	2RHet	3199376	3199376	3234607	7.36e-09	0.0493	DOC4_DM
2R_233990_SNP	3.13e-08	0.0499	XLOC_008884	2R	264145	262676	264145	7.36e-09	0.0493	DOC4_DM
2R_233990_SNP	3.6e-08	0.0441	XLOC_011704	2RHet	1921599	1921599	1923490	7.36e-09	0.0493	DOC4_DM
2R_233990_SNP	3.71e-07	0.0494	XLOC_011705	2RHet	1924263	1924263	1926950	7.36e-09	0.0493	DOC4_DM
2R_233990_SNP	1.22e-09	0.0482	XLOC_011789	2RHet	3215567	3215567	3217239	7.36e-09	0.0493	DOC4_DM
2R_233990_SNP	7.78e-10	0.0482	XLOC_012081	2RHet	3151739	3149849	3151739	7.36e-09	0.0493	DOC4_DM
2R_2349868_SNP	1.67e-07	0.0491	XLOC_006571	2R	2444704	2444704	2447851	1.49e-06	0.0484	INVADER3_I
2R_23567_SNP	5.42e-12	0.045	FBgn0046706	2RHet	3199376	3199376	3234607	7.09e-07	0.0493	DOC4_DM
2R_23567_SNP	5.42e-12	0.045	FBgn0046706	2RHet	3199376	3199376	3234607	1.51e-06	0.0286	S2_DM
2R_23567_SNP	6.65e-12	0.0499	XLOC_008884	2R	264145	262676	264145	1.51e-06	0.0286	S2_DM
2R_23567_SNP	6.65e-12	0.0499	XLOC_008884	2R	264145	262676	264145	7.09e-07	0.0493	DOC4_DM
2R_23567_SNP	1.63e-06	0.0441	XLOC_011704	2RHet	1921599	1921599	1923490	1.51e-06	0.0286	S2_DM
2R_23567_SNP	1.63e-06	0.0441	XLOC_011704	2RHet	1921599	1921599	1923490	7.09e-07	0.0493	DOC4_DM
2R_23567_SNP	1.36e-07	0.0494	XLOC_011705	2RHet	1924263	1924263	1926950	7.09e-07	0.0493	DOC4_DM
2R_23567_SNP	1.36e-07	0.0494	XLOC_011705	2RHet	1924263	1924263	1926950	1.51e-06	0.0286	S2_DM
2R_23567_SNP	1.79e-14	0.0482	XLOC_011789	2RHet	3215567	3215567	3217239	7.09e-07	0.0493	DOC4_DM
2R_23567_SNP	1.79e-14	0.0482	XLOC_011789	2RHet	3215567	3215567	3217239	1.51e-06	0.0286	S2_DM
2R_23567_SNP	5.03e-08	0.0482	XLOC_012081	2RHet	3151739	3149849	3151739	7.09e-07	0.0493	DOC4_DM
2R_23567_SNP	5.03e-08	0.0482	XLOC_012081	2RHet	3151739	3149849	3151739	1.51e-06	0.0286	S2_DM
2R_235675_SNP	4.6e-10	0.045	FBgn0046706	2RHet	3199376	3199376	3234607	6.42e-09	0.0493	DOC4_DM
2R_235675_SNP	6.2e-09	0.0499	XLOC_008884	2R	264145	262676	264145	6.42e-09	0.0493	DOC4_DM
2R_235675_SNP	3.64e-09	0.0441	XLOC_011704	2RHet	1921599	1921599	1923490	6.42e-09	0.0493	DOC4_DM
2R_235675_SNP	2.49e-09	0.0494	XLOC_011705	2RHet	1924263	1924263	1926950	6.42e-09	0.0493	DOC4_DM
2R_235675_SNP	6.72e-13	0.0482	XLOC_011789	2RHet	3215567	3215567	3217239	6.42e-09	0.0493	DOC4_DM
2R_235675_SNP	3.28e-07	0.0499	XLOC_011977	2RHet	1591609	1590552	1591609	6.42e-09	0.0493	DOC4_DM
2R_235675_SNP	3.8e-11	0.0482	XLOC_012081	2RHet	3151739	3149849	3151739	6.42e-09	0.0493	DOC4_DM
2R_23617_SNP	6.64e-11	0.045	FBgn0046706	2RHet	3199376	3199376	3234607	2.9e-08	0.0493	DOC4_DM
2R_23617_SNP	6.64e-11	0.045	FBgn0046706	2RHet	3199376	3199376	3234607	9.54e-06	0.0286	S2_DM
2R_23617_SNP	2.27e-12	0.0499	XLOC_008884	2R	264145	262676	264145	9.54e-06	0.0286	S2_DM
2R_23617_SNP	2.27e-12	0.0499	XLOC_008884	2R	264145	262676	264145	2.9e-08	0.0493	DOC4_DM
2R_23617_SNP	2.01e-06	0.0441	XLOC_011704	2RHet	1921599	1921599	1923490	2.9e-08	0.0493	DOC4_DM
2R_23617_SNP	2.01e-06	0.0441	XLOC_011704	2RHet	1921599	1921599	1923490	9.54e-06	0.0286	S2_DM
2R_23617_SNP	9.02e-08	0.0494	XLOC_011705	2RHet	1924263	1924263	1926950	2.9e-08	0.0493	DOC4_DM
2R_23617_SNP	9.02e-08	0.0494	XLOC_011705	2RHet	1924263	1924263	1926950	9.54e-06	0.0286	S2_DM
2R_23617_SNP	2.52e-13	0.0482	XLOC_011789	2RHet	3215567	3215567	3217239	9.54e-06	0.0286	S2_DM
2R_23617_SNP	2.52e-13	0.0482	XLOC_011789	2RHet	3215567	3215567	3217239	2.9e-08	0.0493	DOC4_DM
2R_23617_SNP	2.61e-09	0.0482	XLOC_012081	2RHet	3151739	3149849	3151739	9.54e-06	0.0286	S2_DM
2R_23617_SNP	2.61e-09	0.0482	XLOC_012081	2RHet	3151739	3149849	3151739	2.9e-08	0.0493	DOC4_DM
2R_238323_DEL	3.32e-12	0.045	FBgn0046706	2RHet	3199376	3199376	3234607	7.95e-10	0.0493	DOC4_DM
2R_238323_DEL	2.01e-10	0.0499	XLOC_008884	2R	264145	262676	264145	7.95e-10	0.0493	DOC4_DM
2R_238323_DEL	1.29e-09	0.0441	XLOC_011704	2RHet	1921599	1921599	1923490	7.95e-10	0.0493	DOC4_DM
2R_238323_DEL	7.39e-09	0.0494	XLOC_011705	2RHet	1924263	1924263	1926950	7.95e-10	0.0493	DOC4_DM
2R_238323_DEL	3.29e-11	0.0482	XLOC_011789	2RHet	3215567	3215567	3217239	7.95e-10	0.0493	DOC4_DM
2R_238323_DEL	1.01e-07	0.0499	XLOC_011977	2RHet	1591609	1590552	1591609	7.95e-10	0.0493	DOC4_DM
2R_238323_DEL	1.1e-08	0.0482	XLOC_012081	2RHet	3151739	3149849	3151739	7.95e-10	0.0493	DOC4_DM
2R_238919_SNP	5.31e-16	0.045	FBgn0046706	2RHet	3199376	3199376	3234607	1.22e-12	0.0493	DOC4_DM
2R_238919_SNP	7.1e-11	0.0499	XLOC_008884	2R	264145	262676	264145	1.22e-12	0.0493	DOC4_DM
2R_238919_SNP	5.86e-12	0.0441	XLOC_011704	2RHet	1921599	1921599	1923490	1.22e-12	0.0493	DOC4_DM
2R_238919_SNP	1.81e-12	0.0494	XLOC_011705	2RHet	1924263	1924263	1926950	1.22e-12	0.0493	DOC4_DM
2R_238919_SNP	4.84e-14	0.0482	XLOC_011789	2RHet	3215567	3215567	3217239	1.22e-12	0.0493	DOC4_DM
2R_238919_SNP	8e-08	0.0499	XLOC_011977	2RHet	1591609	1590552	1591609	1.22e-12	0.0493	DOC4_DM
2R_238919_SNP	1.24e-10	0.0482	XLOC_012081	2RHet	3151739	3149849	3151739	1.22e-12	0.0493	DOC4_DM
2R_2398071_SNP	7.78e-07	0.0491	XLOC_006571	2R	2444704	2444704	2447851	1.65e-06	0.0484	INVADER3_I
2R_24913_SNP	1.8e-11	0.045	FBgn0046706	2RHet	3199376	3199376	3234607	3.25e-06	0.0286	S2_DM
2R_24913_SNP	1.8e-11	0.045	FBgn0046706	2RHet	3199376	3199376	3234607	9.74e-08	0.0493	DOC4_DM
2R_24913_SNP	1.25e-11	0.0499	XLOC_008884	2R	264145	262676	264145	9.74e-08	0.0493	DOC4_DM
2R_24913_SNP	1.25e-11	0.0499	XLOC_008884	2R	264145	262676	264145	3.25e-06	0.0286	S2_DM
2R_24913_SNP	1.28e-06	0.0441	XLOC_011704	2RHet	1921599	1921599	1923490	3.25e-06	0.0286	S2_DM
2R_24913_SNP	1.28e-06	0.0441	XLOC_011704	2RHet	1921599	1921599	1923490	9.74e-08	0.0493	DOC4_DM
2R_24913_SNP	8.51e-08	0.0494	XLOC_011705	2RHet	1924263	1924263	1926950	3.25e-06	0.0286	S2_DM
2R_24913_SNP	8.51e-08	0.0494	XLOC_011705	2RHet	1924263	1924263	1926950	9.74e-08	0.0493	DOC4_DM
2R_24913_SNP	3.35e-14	0.0482	XLOC_011789	2RHet	3215567	3215567	3217239	3.25e-06	0.0286	S2_DM
2R_24913_SNP	3.35e-14	0.0482	XLOC_011789	2RHet	3215567	3215567	3217239	9.74e-08	0.0493	DOC4_DM
2R_24913_SNP	4.78e-08	0.0482	XLOC_012081	2RHet	3151739	3149849	3151739	3.25e-06	0.0286	S2_DM
2R_24913_SNP	4.78e-08	0.0482	XLOC_012081	2RHet	3151739	3149849	3151739	9.74e-08	0.0493	DOC4_DM
2R_24914_INS	2.51e-11	0.045	FBgn0046706	2RHet	3199376	3199376	3234607	1.39e-07	0.0493	DOC4_DM
2R_24914_INS	2.51e-11	0.045	FBgn0046706	2RHet	3199376	3199376	3234607	2.43e-06	0.0286	S2_DM
2R_24914_INS	1.47e-11	0.0499	XLOC_008884	2R	264145	262676	264145	2.43e-06	0.0286	S2_DM
2R_24914_INS	1.47e-11	0.0499	XLOC_008884	2R	264145	262676	264145	1.39e-07	0.0493	DOC4_DM
2R_24914_INS	1.08e-06	0.0441	XLOC_011704	2RHet	1921599	1921599	1923490	2.43e-06	0.0286	S2_DM
2R_24914_INS	1.08e-06	0.0441	XLOC_011704	2RHet	1921599	1921599	1923490	1.39e-07	0.0493	DOC4_DM
2R_24914_INS	8.78e-08	0.0494	XLOC_011705	2RHet	1924263	1924263	1926950	2.43e-06	0.0286	S2_DM
2R_24914_INS	8.78e-08	0.0494	XLOC_011705	2RHet	1924263	1924263	1926950	1.39e-07	0.0493	DOC4_DM
2R_24914_INS	2.49e-14	0.0482	XLOC_011789	2RHet	3215567	3215567	3217239	2.43e-06	0.0286	S2_DM
2R_24914_INS	2.49e-14	0.0482	XLOC_011789	2RHet	3215567	3215567	3217239	1.39e-07	0.0493	DOC4_DM
2R_24914_INS	4.36e-08	0.0482	XLOC_012081	2RHet	3151739	3149849	3151739	1.39e-07	0.0493	DOC4_DM
2R_24914_INS	4.36e-08	0.0482	XLOC_012081	2RHet	3151739	3149849	3151739	2.43e-06	0.0286	S2_DM
2R_251817_SNP	1.31e-08	0.045	FBgn0046706	2RHet	3199376	3199376	3234607	2.82e-08	0.0493	DOC4_DM
2R_251817_SNP	7.3e-08	0.0499	XLOC_008884	2R	264145	262676	264145	2.82e-08	0.0493	DOC4_DM
2R_251817_SNP	3.16e-06	0.0441	XLOC_011704	2RHet	1921599	1921599	1923490	2.82e-08	0.0493	DOC4_DM
2R_251817_SNP	1.09e-06	0.0494	XLOC_011705	2RHet	1924263	1924263	1926950	2.82e-08	0.0493	DOC4_DM
2R_251817_SNP	6.74e-08	0.0482	XLOC_011789	2RHet	3215567	3215567	3217239	2.82e-08	0.0493	DOC4_DM
2R_251817_SNP	1.61e-06	0.0482	XLOC_012081	2RHet	3151739	3149849	3151739	2.82e-08	0.0493	DOC4_DM
2R_251821_SNP	2.05e-10	0.045	FBgn0046706	2RHet	3199376	3199376	3234607	1.37e-07	0.0493	DOC4_DM
2R_251821_SNP	6.9e-09	0.0499	XLOC_008884	2R	264145	262676	264145	1.37e-07	0.0493	DOC4_DM
2R_251821_SNP	1.05e-06	0.0441	XLOC_011704	2RHet	1921599	1921599	1923490	1.37e-07	0.0493	DOC4_DM
2R_251821_SNP	9.97e-07	0.0494	XLOC_011705	2RHet	1924263	1924263	1926950	1.37e-07	0.0493	DOC4_DM
2R_251821_SNP	3.7e-08	0.0482	XLOC_011789	2RHet	3215567	3215567	3217239	1.37e-07	0.0493	DOC4_DM
2R_251821_SNP	3.07e-07	0.0482	XLOC_012081	2RHet	3151739	3149849	3151739	1.37e-07	0.0493	DOC4_DM
2R_253250_SNP	1.67e-14	0.045	FBgn0046706	2RHet	3199376	3199376	3234607	2.99e-13	0.0493	DOC4_DM
2R_253250_SNP	8.27e-13	0.0499	XLOC_008884	2R	264145	262676	264145	2.99e-13	0.0493	DOC4_DM
2R_253250_SNP	7.51e-12	0.0441	XLOC_011704	2RHet	1921599	1921599	1923490	2.99e-13	0.0493	DOC4_DM
2R_253250_SNP	2.8e-12	0.0494	XLOC_011705	2RHet	1924263	1924263	1926950	2.99e-13	0.0493	DOC4_DM
2R_253250_SNP	1.28e-13	0.0482	XLOC_011789	2RHet	3215567	3215567	3217239	2.99e-13	0.0493	DOC4_DM
2R_253250_SNP	3.33e-09	0.0499	XLOC_011977	2RHet	1591609	1590552	1591609	2.99e-13	0.0493	DOC4_DM
2R_253250_SNP	2.31e-11	0.0482	XLOC_012081	2RHet	3151739	3149849	3151739	2.99e-13	0.0493	DOC4_DM
2R_253830_INS	1.1e-12	0.045	FBgn0046706	2RHet	3199376	3199376	3234607	2.9e-12	0.0493	DOC4_DM
2R_253830_INS	3.99e-11	0.0499	XLOC_008884	2R	264145	262676	264145	2.9e-12	0.0493	DOC4_DM
2R_253830_INS	1.36e-11	0.0441	XLOC_011704	2RHet	1921599	1921599	1923490	2.9e-12	0.0493	DOC4_DM
2R_253830_INS	4.07e-11	0.0494	XLOC_011705	2RHet	1924263	1924263	1926950	2.9e-12	0.0493	DOC4_DM
2R_253830_INS	1e-13	0.0482	XLOC_011789	2RHet	3215567	3215567	3217239	2.9e-12	0.0493	DOC4_DM
2R_253830_INS	6.11e-09	0.0499	XLOC_011977	2RHet	1591609	1590552	1591609	2.9e-12	0.0493	DOC4_DM
2R_253830_INS	9.06e-12	0.0482	XLOC_012081	2RHet	3151739	3149849	3151739	2.9e-12	0.0493	DOC4_DM
2R_256447_SNP	7.06e-15	0.045	FBgn0046706	2RHet	3199376	3199376	3234607	1.6e-13	0.0493	DOC4_DM
2R_256447_SNP	3.47e-12	0.0499	XLOC_008884	2R	264145	262676	264145	1.6e-13	0.0493	DOC4_DM
2R_256447_SNP	1.62e-11	0.0441	XLOC_011704	2RHet	1921599	1921599	1923490	1.6e-13	0.0493	DOC4_DM
2R_256447_SNP	2.7e-12	0.0494	XLOC_011705	2RHet	1924263	1924263	1926950	1.6e-13	0.0493	DOC4_DM
2R_256447_SNP	3.48e-14	0.0482	XLOC_011789	2RHet	3215567	3215567	3217239	1.6e-13	0.0493	DOC4_DM
2R_256447_SNP	1.47e-08	0.0499	XLOC_011977	2RHet	1591609	1590552	1591609	1.6e-13	0.0493	DOC4_DM
2R_256447_SNP	6.11e-11	0.0482	XLOC_012081	2RHet	3151739	3149849	3151739	1.6e-13	0.0493	DOC4_DM
2R_262401_SNP	1.18e-12	0.045	FBgn0046706	2RHet	3199376	3199376	3234607	6.49e-13	0.0493	DOC4_DM
2R_262401_SNP	4.1e-14	0.0499	XLOC_008884	2R	264145	262676	264145	6.49e-13	0.0493	DOC4_DM
2R_262401_SNP	3.3e-11	0.0441	XLOC_011704	2RHet	1921599	1921599	1923490	6.49e-13	0.0493	DOC4_DM
2R_262401_SNP	2.79e-11	0.0494	XLOC_011705	2RHet	1924263	1924263	1926950	6.49e-13	0.0493	DOC4_DM
2R_262401_SNP	3.41e-13	0.0482	XLOC_011789	2RHet	3215567	3215567	3217239	6.49e-13	0.0493	DOC4_DM
2R_262401_SNP	2.07e-09	0.0499	XLOC_011977	2RHet	1591609	1590552	1591609	6.49e-13	0.0493	DOC4_DM
2R_262401_SNP	2.89e-10	0.0482	XLOC_012081	2RHet	3151739	3149849	3151739	6.49e-13	0.0493	DOC4_DM
2R_262409_SNP	4.07e-14	0.045	FBgn0046706	2RHet	3199376	3199376	3234607	4.51e-13	0.0493	DOC4_DM
2R_262409_SNP	1.27e-13	0.0499	XLOC_008884	2R	264145	262676	264145	4.51e-13	0.0493	DOC4_DM
2R_262409_SNP	2.78e-11	0.0441	XLOC_011704	2RHet	1921599	1921599	1923490	4.51e-13	0.0493	DOC4_DM
2R_262409_SNP	1.46e-11	0.0494	XLOC_011705	2RHet	1924263	1924263	1926950	4.51e-13	0.0493	DOC4_DM
2R_262409_SNP	4.52e-13	0.0482	XLOC_011789	2RHet	3215567	3215567	3217239	4.51e-13	0.0493	DOC4_DM
2R_262409_SNP	1.07e-08	0.0499	XLOC_011977	2RHet	1591609	1590552	1591609	4.51e-13	0.0493	DOC4_DM
2R_262409_SNP	2.29e-10	0.0482	XLOC_012081	2RHet	3151739	3149849	3151739	4.51e-13	0.0493	DOC4_DM
2R_26908_SNP	1.51e-07	0.0495	XLOC_006268	2R	21910	21910	24748	1.92e-10	0.0486	ACCORD2_I
2R_26908_SNP	4.24e-11	0.0499	XLOC_006282	2R	78321	78321	108264	1.92e-10	0.0486	ACCORD2_I
2R_26908_SNP	2.86e-07	0.045	XLOC_011651	2RHet	861402	861402	862533	1.92e-10	0.0486	ACCORD2_I
2R_26908_SNP	1.17e-08	0.0486	XLOC_011942	2RHet	1262608	1258487	1262608	1.92e-10	0.0486	ACCORD2_I
2R_274816_SNP	1.14e-14	0.045	FBgn0046706	2RHet	3199376	3199376	3234607	4.04e-13	0.0493	DOC4_DM
2R_274816_SNP	2.6e-12	0.0499	XLOC_008884	2R	264145	262676	264145	4.04e-13	0.0493	DOC4_DM
2R_274816_SNP	5.96e-15	0.0441	XLOC_011704	2RHet	1921599	1921599	1923490	4.04e-13	0.0493	DOC4_DM
2R_274816_SNP	8.3e-15	0.0494	XLOC_011705	2RHet	1924263	1924263	1926950	4.04e-13	0.0493	DOC4_DM
2R_274816_SNP	5.17e-13	0.0482	XLOC_011789	2RHet	3215567	3215567	3217239	4.04e-13	0.0493	DOC4_DM
2R_274816_SNP	1.99e-11	0.0499	XLOC_011977	2RHet	1591609	1590552	1591609	4.04e-13	0.0493	DOC4_DM
2R_274816_SNP	4.96e-13	0.0482	XLOC_012081	2RHet	3151739	3149849	3151739	4.04e-13	0.0493	DOC4_DM
2R_27538_SNP	1.29e-20	0.045	FBgn0046706	2RHet	3199376	3199376	3234607	3.34e-14	0.0493	DOC4_DM
2R_27538_SNP	1.45e-08	0.0472	XLOC_008881	2R	250706	249434	250706	3.34e-14	0.0493	DOC4_DM
2R_27538_SNP	5.48e-14	0.0499	XLOC_008884	2R	264145	262676	264145	3.34e-14	0.0493	DOC4_DM
2R_27538_SNP	4.17e-16	0.0441	XLOC_011704	2RHet	1921599	1921599	1923490	3.34e-14	0.0493	DOC4_DM
2R_27538_SNP	8.19e-15	0.0494	XLOC_011705	2RHet	1924263	1924263	1926950	3.34e-14	0.0493	DOC4_DM
2R_27538_SNP	3.89e-18	0.0482	XLOC_011789	2RHet	3215567	3215567	3217239	3.34e-14	0.0493	DOC4_DM
2R_27538_SNP	2.06e-10	0.0499	XLOC_011977	2RHet	1591609	1590552	1591609	3.34e-14	0.0493	DOC4_DM
2R_27538_SNP	1.44e-15	0.0482	XLOC_012081	2RHet	3151739	3149849	3151739	3.34e-14	0.0493	DOC4_DM
2R_275771_SNP	1.07e-13	0.045	FBgn0046706	2RHet	3199376	3199376	3234607	5.26e-13	0.0493	DOC4_DM
2R_275771_SNP	8.79e-12	0.0499	XLOC_008884	2R	264145	262676	264145	5.26e-13	0.0493	DOC4_DM
2R_275771_SNP	9.77e-14	0.0441	XLOC_011704	2RHet	1921599	1921599	1923490	5.26e-13	0.0493	DOC4_DM
2R_275771_SNP	2.24e-13	0.0494	XLOC_011705	2RHet	1924263	1924263	1926950	5.26e-13	0.0493	DOC4_DM
2R_275771_SNP	1.46e-11	0.0482	XLOC_011789	2RHet	3215567	3215567	3217239	5.26e-13	0.0493	DOC4_DM
2R_275771_SNP	3.15e-10	0.0499	XLOC_011977	2RHet	1591609	1590552	1591609	5.26e-13	0.0493	DOC4_DM
2R_275771_SNP	8.49e-12	0.0482	XLOC_012081	2RHet	3151739	3149849	3151739	5.26e-13	0.0493	DOC4_DM
2R_277574_SNP	4.43e-13	0.045	FBgn0046706	2RHet	3199376	3199376	3234607	5.84e-13	0.0493	DOC4_DM
2R_277574_SNP	2.15e-10	0.0499	XLOC_008884	2R	264145	262676	264145	5.84e-13	0.0493	DOC4_DM
2R_277574_SNP	1.96e-06	0.0499	XLOC_008927	2R	565520	563804	565520	5.84e-13	0.0493	DOC4_DM
2R_277574_SNP	6.9e-13	0.0441	XLOC_011704	2RHet	1921599	1921599	1923490	5.84e-13	0.0493	DOC4_DM
2R_277574_SNP	2.84e-13	0.0494	XLOC_011705	2RHet	1924263	1924263	1926950	5.84e-13	0.0493	DOC4_DM
2R_277574_SNP	6.01e-12	0.0482	XLOC_011789	2RHet	3215567	3215567	3217239	5.84e-13	0.0493	DOC4_DM
2R_277574_SNP	1.34e-09	0.0499	XLOC_011977	2RHet	1591609	1590552	1591609	5.84e-13	0.0493	DOC4_DM
2R_277574_SNP	5.19e-10	0.0482	XLOC_012081	2RHet	3151739	3149849	3151739	5.84e-13	0.0493	DOC4_DM
2R_278036_SNP	2.03e-12	0.045	FBgn0046706	2RHet	3199376	3199376	3234607	6.31e-12	0.0493	DOC4_DM
2R_278036_SNP	7.75e-11	0.0499	XLOC_008884	2R	264145	262676	264145	6.31e-12	0.0493	DOC4_DM
2R_278036_SNP	6.83e-14	0.0441	XLOC_011704	2RHet	1921599	1921599	1923490	6.31e-12	0.0493	DOC4_DM
2R_278036_SNP	2.87e-12	0.0494	XLOC_011705	2RHet	1924263	1924263	1926950	6.31e-12	0.0493	DOC4_DM
2R_278036_SNP	8.19e-13	0.0482	XLOC_011789	2RHet	3215567	3215567	3217239	6.31e-12	0.0493	DOC4_DM
2R_278036_SNP	8.41e-10	0.0499	XLOC_011977	2RHet	1591609	1590552	1591609	6.31e-12	0.0493	DOC4_DM
2R_278036_SNP	3.12e-11	0.0482	XLOC_012081	2RHet	3151739	3149849	3151739	6.31e-12	0.0493	DOC4_DM
2R_278352_DEL	1.11e-11	0.045	FBgn0046706	2RHet	3199376	3199376	3234607	2.13e-10	0.0493	DOC4_DM
2R_278352_DEL	6.74e-10	0.0499	XLOC_008884	2R	264145	262676	264145	2.13e-10	0.0493	DOC4_DM
2R_278352_DEL	3.16e-13	0.0441	XLOC_011704	2RHet	1921599	1921599	1923490	2.13e-10	0.0493	DOC4_DM
2R_278352_DEL	1.29e-14	0.0494	XLOC_011705	2RHet	1924263	1924263	1926950	2.13e-10	0.0493	DOC4_DM
2R_278352_DEL	5.09e-12	0.0482	XLOC_011789	2RHet	3215567	3215567	3217239	2.13e-10	0.0493	DOC4_DM
2R_278352_DEL	8.29e-10	0.0499	XLOC_011977	2RHet	1591609	1590552	1591609	2.13e-10	0.0493	DOC4_DM
2R_278352_DEL	9.43e-10	0.0482	XLOC_012081	2RHet	3151739	3149849	3151739	2.13e-10	0.0493	DOC4_DM
2R_278489_SNP	8.01e-15	0.045	FBgn0046706	2RHet	3199376	3199376	3234607	4.45e-13	0.0493	DOC4_DM
2R_278489_SNP	8.61e-08	0.0472	FBgn0264910	2R	510016	508623	510016	4.45e-13	0.0493	DOC4_DM
2R_278489_SNP	3.21e-12	0.0499	XLOC_008884	2R	264145	262676	264145	4.45e-13	0.0493	DOC4_DM
2R_278489_SNP	1.33e-15	0.0441	XLOC_011704	2RHet	1921599	1921599	1923490	4.45e-13	0.0493	DOC4_DM
2R_278489_SNP	8.57e-15	0.0494	XLOC_011705	2RHet	1924263	1924263	1926950	4.45e-13	0.0493	DOC4_DM
2R_278489_SNP	7.52e-13	0.0482	XLOC_011789	2RHet	3215567	3215567	3217239	4.45e-13	0.0493	DOC4_DM
2R_278489_SNP	5.62e-10	0.0499	XLOC_011977	2RHet	1591609	1590552	1591609	4.45e-13	0.0493	DOC4_DM
2R_278489_SNP	2.37e-12	0.0482	XLOC_012081	2RHet	3151739	3149849	3151739	4.45e-13	0.0493	DOC4_DM
2R_278656_SNP	2.67e-14	0.045	FBgn0046706	2RHet	3199376	3199376	3234607	3.37e-12	0.0493	DOC4_DM
2R_278656_SNP	4.83e-12	0.0499	XLOC_008884	2R	264145	262676	264145	3.37e-12	0.0493	DOC4_DM
2R_278656_SNP	1.71e-14	0.0441	XLOC_011704	2RHet	1921599	1921599	1923490	3.37e-12	0.0493	DOC4_DM
2R_278656_SNP	2.47e-14	0.0494	XLOC_011705	2RHet	1924263	1924263	1926950	3.37e-12	0.0493	DOC4_DM
2R_278656_SNP	3.23e-10	0.0482	XLOC_011789	2RHet	3215567	3215567	3217239	3.37e-12	0.0493	DOC4_DM
2R_278656_SNP	3.02e-10	0.0499	XLOC_011977	2RHet	1591609	1590552	1591609	3.37e-12	0.0493	DOC4_DM
2R_278656_SNP	2.09e-10	0.0482	XLOC_012081	2RHet	3151739	3149849	3151739	3.37e-12	0.0493	DOC4_DM
2R_279117_SNP	2.27e-09	0.045	FBgn0046706	2RHet	3199376	3199376	3234607	1.17e-09	0.0493	DOC4_DM
2R_279117_SNP	3.76e-08	0.0499	XLOC_008884	2R	264145	262676	264145	1.17e-09	0.0493	DOC4_DM
2R_279117_SNP	3.65e-10	0.0441	XLOC_011704	2RHet	1921599	1921599	1923490	1.17e-09	0.0493	DOC4_DM
2R_279117_SNP	6.41e-12	0.0494	XLOC_011705	2RHet	1924263	1924263	1926950	1.17e-09	0.0493	DOC4_DM
2R_279117_SNP	2.27e-08	0.0482	XLOC_011789	2RHet	3215567	3215567	3217239	1.17e-09	0.0493	DOC4_DM
2R_279117_SNP	7.26e-09	0.0499	XLOC_011977	2RHet	1591609	1590552	1591609	1.17e-09	0.0493	DOC4_DM
2R_279117_SNP	1.09e-08	0.0482	XLOC_012081	2RHet	3151739	3149849	3151739	1.17e-09	0.0493	DOC4_DM
2R_279118_SNP	1.52e-07	0.045	FBgn0046706	2RHet	3199376	3199376	3234607	1.75e-09	0.0493	DOC4_DM
2R_279118_SNP	7.06e-07	0.0499	XLOC_008884	2R	264145	262676	264145	1.75e-09	0.0493	DOC4_DM
2R_279118_SNP	4.92e-07	0.0441	XLOC_011704	2RHet	1921599	1921599	1923490	1.75e-09	0.0493	DOC4_DM
2R_279118_SNP	6.01e-09	0.0494	XLOC_011705	2RHet	1924263	1924263	1926950	1.75e-09	0.0493	DOC4_DM
2R_279118_SNP	4.91e-07	0.0499	XLOC_011977	2RHet	1591609	1590552	1591609	1.75e-09	0.0493	DOC4_DM
2R_279766_SNP	3.51e-13	0.045	FBgn0046706	2RHet	3199376	3199376	3234607	1.54e-11	0.0493	DOC4_DM
2R_279766_SNP	3.81e-08	0.0472	FBgn0264910	2R	510016	508623	510016	1.54e-11	0.0493	DOC4_DM
2R_279766_SNP	7.73e-11	0.0499	XLOC_008884	2R	264145	262676	264145	1.54e-11	0.0493	DOC4_DM
2R_279766_SNP	1.33e-13	0.0441	XLOC_011704	2RHet	1921599	1921599	1923490	1.54e-11	0.0493	DOC4_DM
2R_279766_SNP	3.16e-13	0.0494	XLOC_011705	2RHet	1924263	1924263	1926950	1.54e-11	0.0493	DOC4_DM
2R_279766_SNP	5.47e-13	0.0482	XLOC_011789	2RHet	3215567	3215567	3217239	1.54e-11	0.0493	DOC4_DM
2R_279766_SNP	4.97e-10	0.0499	XLOC_011977	2RHet	1591609	1590552	1591609	1.54e-11	0.0493	DOC4_DM
2R_279766_SNP	2.41e-12	0.0482	XLOC_012081	2RHet	3151739	3149849	3151739	1.54e-11	0.0493	DOC4_DM
2R_28163_SNP	5.17e-07	0.0495	XLOC_006268	2R	21910	21910	24748	4.4e-08	0.0486	ACCORD2_I
2R_28163_SNP	1.12e-10	0.0499	XLOC_006282	2R	78321	78321	108264	4.4e-08	0.0486	ACCORD2_I
2R_28163_SNP	4.95e-07	0.045	XLOC_011651	2RHet	861402	861402	862533	4.4e-08	0.0486	ACCORD2_I
2R_28163_SNP	1.61e-08	0.0486	XLOC_011942	2RHet	1262608	1258487	1262608	4.4e-08	0.0486	ACCORD2_I
2R_282651_DEL	6.1e-08	0.045	FBgn0046706	2RHet	3199376	3199376	3234607	5.84e-08	0.0493	DOC4_DM
2R_282651_DEL	1.93e-07	0.0499	XLOC_008884	2R	264145	262676	264145	5.84e-08	0.0493	DOC4_DM
2R_282651_DEL	3.24e-09	0.0441	XLOC_011704	2RHet	1921599	1921599	1923490	5.84e-08	0.0493	DOC4_DM
2R_282651_DEL	1.95e-08	0.0494	XLOC_011705	2RHet	1924263	1924263	1926950	5.84e-08	0.0493	DOC4_DM
2R_282651_DEL	1.21e-06	0.0482	XLOC_011789	2RHet	3215567	3215567	3217239	5.84e-08	0.0493	DOC4_DM
2R_282651_DEL	1.45e-06	0.0499	XLOC_011977	2RHet	1591609	1590552	1591609	5.84e-08	0.0493	DOC4_DM
2R_282651_DEL	3.15e-07	0.0482	XLOC_012081	2RHet	3151739	3149849	3151739	5.84e-08	0.0493	DOC4_DM
2R_285304_SNP	1.3e-14	0.045	FBgn0046706	2RHet	3199376	3199376	3234607	2.71e-13	0.0493	DOC4_DM
2R_285304_SNP	8.27e-08	0.0472	FBgn0264910	2R	510016	508623	510016	2.71e-13	0.0493	DOC4_DM
2R_285304_SNP	2.75e-12	0.0499	XLOC_008884	2R	264145	262676	264145	2.71e-13	0.0493	DOC4_DM
2R_285304_SNP	1.93e-14	0.0441	XLOC_011704	2RHet	1921599	1921599	1923490	2.71e-13	0.0493	DOC4_DM
2R_285304_SNP	2.78e-14	0.0494	XLOC_011705	2RHet	1924263	1924263	1926950	2.71e-13	0.0493	DOC4_DM
2R_285304_SNP	1.46e-13	0.0482	XLOC_011789	2RHet	3215567	3215567	3217239	2.71e-13	0.0493	DOC4_DM
2R_285304_SNP	3.34e-11	0.0499	XLOC_011977	2RHet	1591609	1590552	1591609	2.71e-13	0.0493	DOC4_DM
2R_285304_SNP	2.42e-12	0.0482	XLOC_012081	2RHet	3151739	3149849	3151739	2.71e-13	0.0493	DOC4_DM
2R_28624_SNP	6.49e-08	0.0495	XLOC_006268	2R	21910	21910	24748	6.15e-08	0.0486	ACCORD2_I
2R_28624_SNP	4.6e-13	0.0499	XLOC_006282	2R	78321	78321	108264	6.15e-08	0.0486	ACCORD2_I
2R_28624_SNP	8.94e-07	0.045	XLOC_011651	2RHet	861402	861402	862533	6.15e-08	0.0486	ACCORD2_I
2R_28624_SNP	4.98e-13	0.0486	XLOC_011942	2RHet	1262608	1258487	1262608	6.15e-08	0.0486	ACCORD2_I
2R_286372_SNP	4.28e-11	0.045	FBgn0046706	2RHet	3199376	3199376	3234607	6.98e-11	0.0493	DOC4_DM
2R_286372_SNP	2e-08	0.0472	FBgn0264910	2R	510016	508623	510016	6.98e-11	0.0493	DOC4_DM
2R_286372_SNP	5.22e-09	0.0499	XLOC_008884	2R	264145	262676	264145	6.98e-11	0.0493	DOC4_DM
2R_286372_SNP	1.09e-07	0.0499	XLOC_008927	2R	565520	563804	565520	6.98e-11	0.0493	DOC4_DM
2R_286372_SNP	7.78e-13	0.0441	XLOC_011704	2RHet	1921599	1921599	1923490	6.98e-11	0.0493	DOC4_DM
2R_286372_SNP	4.48e-13	0.0494	XLOC_011705	2RHet	1924263	1924263	1926950	6.98e-11	0.0493	DOC4_DM
2R_286372_SNP	8.72e-11	0.0482	XLOC_011789	2RHet	3215567	3215567	3217239	6.98e-11	0.0493	DOC4_DM
2R_286372_SNP	6.31e-10	0.0499	XLOC_011977	2RHet	1591609	1590552	1591609	6.98e-11	0.0493	DOC4_DM
2R_286372_SNP	3.62e-11	0.0482	XLOC_012081	2RHet	3151739	3149849	3151739	6.98e-11	0.0493	DOC4_DM
2R_286966_DEL	9.35e-12	0.045	FBgn0046706	2RHet	3199376	3199376	3234607	1.81e-11	0.0493	DOC4_DM
2R_286966_DEL	1.19e-10	0.0499	XLOC_008884	2R	264145	262676	264145	1.81e-11	0.0493	DOC4_DM
2R_286966_DEL	2.94e-12	0.0441	XLOC_011704	2RHet	1921599	1921599	1923490	1.81e-11	0.0493	DOC4_DM
2R_286966_DEL	7.08e-14	0.0494	XLOC_011705	2RHet	1924263	1924263	1926950	1.81e-11	0.0493	DOC4_DM
2R_286966_DEL	6.45e-12	0.0482	XLOC_011789	2RHet	3215567	3215567	3217239	1.81e-11	0.0493	DOC4_DM
2R_286966_DEL	5.72e-10	0.0499	XLOC_011977	2RHet	1591609	1590552	1591609	1.81e-11	0.0493	DOC4_DM
2R_286966_DEL	3.61e-08	0.0482	XLOC_012081	2RHet	3151739	3149849	3151739	1.81e-11	0.0493	DOC4_DM
2R_288715_SNP	7.7e-15	0.045	FBgn0046706	2RHet	3199376	3199376	3234607	7.68e-13	0.0493	DOC4_DM
2R_288715_SNP	1.15e-11	0.0499	XLOC_008884	2R	264145	262676	264145	7.68e-13	0.0493	DOC4_DM
2R_288715_SNP	7.14e-15	0.0441	XLOC_011704	2RHet	1921599	1921599	1923490	7.68e-13	0.0493	DOC4_DM
2R_288715_SNP	9.2e-14	0.0494	XLOC_011705	2RHet	1924263	1924263	1926950	7.68e-13	0.0493	DOC4_DM
2R_288715_SNP	1.15e-12	0.0482	XLOC_011789	2RHet	3215567	3215567	3217239	7.68e-13	0.0493	DOC4_DM
2R_288715_SNP	1.87e-10	0.0499	XLOC_011977	2RHet	1591609	1590552	1591609	7.68e-13	0.0493	DOC4_DM
2R_288715_SNP	1.43e-11	0.0482	XLOC_012081	2RHet	3151739	3149849	3151739	7.68e-13	0.0493	DOC4_DM
2R_289665_SNP	2.33e-15	0.045	FBgn0046706	2RHet	3199376	3199376	3234607	6.55e-13	0.0493	DOC4_DM
2R_289665_SNP	8.66e-12	0.0499	XLOC_008884	2R	264145	262676	264145	6.55e-13	0.0493	DOC4_DM
2R_289665_SNP	3.05e-15	0.0441	XLOC_011704	2RHet	1921599	1921599	1923490	6.55e-13	0.0493	DOC4_DM
2R_289665_SNP	2.86e-14	0.0494	XLOC_011705	2RHet	1924263	1924263	1926950	6.55e-13	0.0493	DOC4_DM
2R_289665_SNP	4.6e-13	0.0482	XLOC_011789	2RHet	3215567	3215567	3217239	6.55e-13	0.0493	DOC4_DM
2R_289665_SNP	1.89e-10	0.0499	XLOC_011977	2RHet	1591609	1590552	1591609	6.55e-13	0.0493	DOC4_DM
2R_289665_SNP	5.42e-12	0.0482	XLOC_012081	2RHet	3151739	3149849	3151739	6.55e-13	0.0493	DOC4_DM
2R_29084_SNP	7.76e-07	0.0495	XLOC_006268	2R	21910	21910	24748	3.9e-09	0.0486	ACCORD2_I
2R_29084_SNP	7.74e-11	0.0499	XLOC_006282	2R	78321	78321	108264	3.9e-09	0.0486	ACCORD2_I
2R_29084_SNP	1.45e-07	0.045	XLOC_011651	2RHet	861402	861402	862533	3.9e-09	0.0486	ACCORD2_I
2R_29084_SNP	9.05e-09	0.0486	XLOC_011942	2RHet	1262608	1258487	1262608	3.9e-09	0.0486	ACCORD2_I
2R_291463_SNP	3.28e-14	0.045	FBgn0046706	2RHet	3199376	3199376	3234607	1.73e-12	0.0493	DOC4_DM
2R_291463_SNP	3.65e-11	0.0499	XLOC_008884	2R	264145	262676	264145	1.73e-12	0.0493	DOC4_DM
2R_291463_SNP	1.74e-12	0.0441	XLOC_011704	2RHet	1921599	1921599	1923490	1.73e-12	0.0493	DOC4_DM
2R_291463_SNP	1.35e-12	0.0494	XLOC_011705	2RHet	1924263	1924263	1926950	1.73e-12	0.0493	DOC4_DM
2R_291463_SNP	7.8e-12	0.0482	XLOC_011789	2RHet	3215567	3215567	3217239	1.73e-12	0.0493	DOC4_DM
2R_291463_SNP	1.68e-10	0.0499	XLOC_011977	2RHet	1591609	1590552	1591609	1.73e-12	0.0493	DOC4_DM
2R_291463_SNP	1.3e-10	0.0482	XLOC_012081	2RHet	3151739	3149849	3151739	1.73e-12	0.0493	DOC4_DM
2R_293064_SNP	4.79e-12	0.045	FBgn0046706	2RHet	3199376	3199376	3234607	7.43e-13	0.0493	DOC4_DM
2R_293064_SNP	1.22e-08	0.0472	FBgn0264910	2R	510016	508623	510016	7.43e-13	0.0493	DOC4_DM
2R_293064_SNP	1.94e-08	0.0499	XLOC_008884	2R	264145	262676	264145	7.43e-13	0.0493	DOC4_DM
2R_293064_SNP	6.88e-07	0.0499	XLOC_008927	2R	565520	563804	565520	7.43e-13	0.0493	DOC4_DM
2R_293064_SNP	1.03e-12	0.0441	XLOC_011704	2RHet	1921599	1921599	1923490	7.43e-13	0.0493	DOC4_DM
2R_293064_SNP	2.63e-13	0.0494	XLOC_011705	2RHet	1924263	1924263	1926950	7.43e-13	0.0493	DOC4_DM
2R_293064_SNP	1.74e-10	0.0482	XLOC_011789	2RHet	3215567	3215567	3217239	7.43e-13	0.0493	DOC4_DM
2R_293064_SNP	2.65e-09	0.0499	XLOC_011977	2RHet	1591609	1590552	1591609	7.43e-13	0.0493	DOC4_DM
2R_293064_SNP	4.13e-09	0.0482	XLOC_012081	2RHet	3151739	3149849	3151739	7.43e-13	0.0493	DOC4_DM
2R_293709_SNP	1.73e-12	0.045	FBgn0046706	2RHet	3199376	3199376	3234607	4e-12	0.0493	DOC4_DM
2R_293709_SNP	3.33e-08	0.0472	FBgn0264910	2R	510016	508623	510016	4e-12	0.0493	DOC4_DM
2R_293709_SNP	9.86e-11	0.0499	XLOC_008884	2R	264145	262676	264145	4e-12	0.0493	DOC4_DM
2R_293709_SNP	2.67e-12	0.0441	XLOC_011704	2RHet	1921599	1921599	1923490	4e-12	0.0493	DOC4_DM
2R_293709_SNP	1.17e-12	0.0494	XLOC_011705	2RHet	1924263	1924263	1926950	4e-12	0.0493	DOC4_DM
2R_293709_SNP	1.32e-11	0.0482	XLOC_011789	2RHet	3215567	3215567	3217239	4e-12	0.0493	DOC4_DM
2R_293709_SNP	4.21e-10	0.0499	XLOC_011977	2RHet	1591609	1590552	1591609	4e-12	0.0493	DOC4_DM
2R_293709_SNP	1.4e-10	0.0482	XLOC_012081	2RHet	3151739	3149849	3151739	4e-12	0.0493	DOC4_DM
2R_294001_SNP	9.73e-16	0.045	FBgn0046706	2RHet	3199376	3199376	3234607	3.06e-12	0.0493	DOC4_DM
2R_294001_SNP	1.56e-10	0.0499	XLOC_008884	2R	264145	262676	264145	3.06e-12	0.0493	DOC4_DM
2R_294001_SNP	6.23e-16	0.0441	XLOC_011704	2RHet	1921599	1921599	1923490	3.06e-12	0.0493	DOC4_DM
2R_294001_SNP	1.31e-15	0.0494	XLOC_011705	2RHet	1924263	1924263	1926950	3.06e-12	0.0493	DOC4_DM
2R_294001_SNP	2.57e-13	0.0482	XLOC_011789	2RHet	3215567	3215567	3217239	3.06e-12	0.0493	DOC4_DM
2R_294001_SNP	1.13e-10	0.0499	XLOC_011977	2RHet	1591609	1590552	1591609	3.06e-12	0.0493	DOC4_DM
2R_294001_SNP	4.17e-11	0.0482	XLOC_012081	2RHet	3151739	3149849	3151739	3.06e-12	0.0493	DOC4_DM
2R_294087_SNP	4.28e-12	0.045	FBgn0046706	2RHet	3199376	3199376	3234607	3.33e-12	0.0493	DOC4_DM
2R_294087_SNP	6.87e-08	0.0472	FBgn0264910	2R	510016	508623	510016	3.33e-12	0.0493	DOC4_DM
2R_294087_SNP	7.51e-11	0.0499	XLOC_008884	2R	264145	262676	264145	3.33e-12	0.0493	DOC4_DM
2R_294087_SNP	3.98e-13	0.0441	XLOC_011704	2RHet	1921599	1921599	1923490	3.33e-12	0.0493	DOC4_DM
2R_294087_SNP	3.51e-14	0.0494	XLOC_011705	2RHet	1924263	1924263	1926950	3.33e-12	0.0493	DOC4_DM
2R_294087_SNP	4.36e-12	0.0482	XLOC_011789	2RHet	3215567	3215567	3217239	3.33e-12	0.0493	DOC4_DM
2R_294087_SNP	2.43e-09	0.0499	XLOC_011977	2RHet	1591609	1590552	1591609	3.33e-12	0.0493	DOC4_DM
2R_294087_SNP	2.12e-10	0.0482	XLOC_012081	2RHet	3151739	3149849	3151739	3.33e-12	0.0493	DOC4_DM
2R_294202_SNP	1.56e-14	0.045	FBgn0046706	2RHet	3199376	3199376	3234607	2.79e-13	0.0493	DOC4_DM
2R_294202_SNP	1.04e-07	0.0472	FBgn0264910	2R	510016	508623	510016	2.79e-13	0.0493	DOC4_DM
2R_294202_SNP	2.86e-12	0.0499	XLOC_008884	2R	264145	262676	264145	2.79e-13	0.0493	DOC4_DM
2R_294202_SNP	1.87e-14	0.0441	XLOC_011704	2RHet	1921599	1921599	1923490	2.79e-13	0.0493	DOC4_DM
2R_294202_SNP	3e-14	0.0494	XLOC_011705	2RHet	1924263	1924263	1926950	2.79e-13	0.0493	DOC4_DM
2R_294202_SNP	2e-13	0.0482	XLOC_011789	2RHet	3215567	3215567	3217239	2.79e-13	0.0493	DOC4_DM
2R_294202_SNP	4.36e-12	0.0499	XLOC_011977	2RHet	1591609	1590552	1591609	2.79e-13	0.0493	DOC4_DM
2R_294202_SNP	5.82e-12	0.0482	XLOC_012081	2RHet	3151739	3149849	3151739	2.79e-13	0.0493	DOC4_DM
2R_296400_SNP	6.24e-15	0.045	FBgn0046706	2RHet	3199376	3199376	3234607	7.92e-13	0.0493	DOC4_DM
2R_296400_SNP	9.87e-12	0.0499	XLOC_008884	2R	264145	262676	264145	7.92e-13	0.0493	DOC4_DM
2R_296400_SNP	5.85e-15	0.0441	XLOC_011704	2RHet	1921599	1921599	1923490	7.92e-13	0.0493	DOC4_DM
2R_296400_SNP	7.67e-14	0.0494	XLOC_011705	2RHet	1924263	1924263	1926950	7.92e-13	0.0493	DOC4_DM
2R_296400_SNP	1.03e-12	0.0482	XLOC_011789	2RHet	3215567	3215567	3217239	7.92e-13	0.0493	DOC4_DM
2R_296400_SNP	1.63e-10	0.0499	XLOC_011977	2RHet	1591609	1590552	1591609	7.92e-13	0.0493	DOC4_DM
2R_296400_SNP	1.42e-11	0.0482	XLOC_012081	2RHet	3151739	3149849	3151739	7.92e-13	0.0493	DOC4_DM
2R_297168_SNP	3.24e-11	0.045	FBgn0046706	2RHet	3199376	3199376	3234607	1.33e-11	0.0493	DOC4_DM
2R_297168_SNP	2.89e-09	0.0499	XLOC_008884	2R	264145	262676	264145	1.33e-11	0.0493	DOC4_DM
2R_297168_SNP	9.57e-12	0.0441	XLOC_011704	2RHet	1921599	1921599	1923490	1.33e-11	0.0493	DOC4_DM
2R_297168_SNP	1.2e-11	0.0494	XLOC_011705	2RHet	1924263	1924263	1926950	1.33e-11	0.0493	DOC4_DM
2R_297168_SNP	1.11e-09	0.0482	XLOC_011789	2RHet	3215567	3215567	3217239	1.33e-11	0.0493	DOC4_DM
2R_297168_SNP	4.71e-09	0.0499	XLOC_011977	2RHet	1591609	1590552	1591609	1.33e-11	0.0493	DOC4_DM
2R_297168_SNP	7.85e-11	0.0482	XLOC_012081	2RHet	3151739	3149849	3151739	1.33e-11	0.0493	DOC4_DM
2R_297173_SNP	1.15e-09	0.045	FBgn0046706	2RHet	3199376	3199376	3234607	1.03e-08	0.0493	DOC4_DM
2R_297173_SNP	1.28e-07	0.0499	XLOC_008884	2R	264145	262676	264145	1.03e-08	0.0493	DOC4_DM
2R_297173_SNP	1.64e-11	0.0441	XLOC_011704	2RHet	1921599	1921599	1923490	1.03e-08	0.0493	DOC4_DM
2R_297173_SNP	5.42e-11	0.0494	XLOC_011705	2RHet	1924263	1924263	1926950	1.03e-08	0.0493	DOC4_DM
2R_297173_SNP	3.79e-10	0.0482	XLOC_011789	2RHet	3215567	3215567	3217239	1.03e-08	0.0493	DOC4_DM
2R_297173_SNP	4.33e-09	0.0499	XLOC_011977	2RHet	1591609	1590552	1591609	1.03e-08	0.0493	DOC4_DM
2R_297173_SNP	1.36e-10	0.0482	XLOC_012081	2RHet	3151739	3149849	3151739	1.03e-08	0.0493	DOC4_DM
2R_299301_SNP	2.86e-16	0.045	FBgn0046706	2RHet	3199376	3199376	3234607	2.01e-14	0.0493	DOC4_DM
2R_299301_SNP	1.97e-13	0.0499	XLOC_008884	2R	264145	262676	264145	2.01e-14	0.0493	DOC4_DM
2R_299301_SNP	1.45e-13	0.0441	XLOC_011704	2RHet	1921599	1921599	1923490	2.01e-14	0.0493	DOC4_DM
2R_299301_SNP	1.88e-13	0.0494	XLOC_011705	2RHet	1924263	1924263	1926950	2.01e-14	0.0493	DOC4_DM
2R_299301_SNP	1.97e-15	0.0482	XLOC_011789	2RHet	3215567	3215567	3217239	2.01e-14	0.0493	DOC4_DM
2R_299301_SNP	1.47e-10	0.0499	XLOC_011977	2RHet	1591609	1590552	1591609	2.01e-14	0.0493	DOC4_DM
2R_299301_SNP	4.78e-12	0.0482	XLOC_012081	2RHet	3151739	3149849	3151739	2.01e-14	0.0493	DOC4_DM
2R_299678_SNP	5.1e-12	0.045	FBgn0046706	2RHet	3199376	3199376	3234607	4.36e-13	0.0493	DOC4_DM
2R_299678_SNP	1.79e-10	0.0499	XLOC_008884	2R	264145	262676	264145	4.36e-13	0.0493	DOC4_DM
2R_299678_SNP	7.89e-12	0.0441	XLOC_011704	2RHet	1921599	1921599	1923490	4.36e-13	0.0493	DOC4_DM
2R_299678_SNP	2.94e-13	0.0494	XLOC_011705	2RHet	1924263	1924263	1926950	4.36e-13	0.0493	DOC4_DM
2R_299678_SNP	2.18e-10	0.0482	XLOC_011789	2RHet	3215567	3215567	3217239	4.36e-13	0.0493	DOC4_DM
2R_299678_SNP	8.25e-09	0.0499	XLOC_011977	2RHet	1591609	1590552	1591609	4.36e-13	0.0493	DOC4_DM
2R_299678_SNP	1e-09	0.0482	XLOC_012081	2RHet	3151739	3149849	3151739	4.36e-13	0.0493	DOC4_DM
2R_299931_SNP	5.5e-12	0.045	FBgn0046706	2RHet	3199376	3199376	3234607	5.62e-13	0.0493	DOC4_DM
2R_299931_SNP	1.59e-10	0.0499	XLOC_008884	2R	264145	262676	264145	5.62e-13	0.0493	DOC4_DM
2R_299931_SNP	2.14e-12	0.0441	XLOC_011704	2RHet	1921599	1921599	1923490	5.62e-13	0.0493	DOC4_DM
2R_299931_SNP	3.71e-13	0.0494	XLOC_011705	2RHet	1924263	1924263	1926950	5.62e-13	0.0493	DOC4_DM
2R_299931_SNP	1.36e-09	0.0482	XLOC_011789	2RHet	3215567	3215567	3217239	5.62e-13	0.0493	DOC4_DM
2R_299931_SNP	4.91e-09	0.0499	XLOC_011977	2RHet	1591609	1590552	1591609	5.62e-13	0.0493	DOC4_DM
2R_299931_SNP	3.32e-08	0.0482	XLOC_012081	2RHet	3151739	3149849	3151739	5.62e-13	0.0493	DOC4_DM
2R_301543_INS	2.57e-11	0.045	FBgn0046706	2RHet	3199376	3199376	3234607	1.45e-08	0.0493	DOC4_DM
2R_301543_INS	2.54e-09	0.0499	XLOC_008884	2R	264145	262676	264145	1.45e-08	0.0493	DOC4_DM
2R_301543_INS	6.02e-13	0.0441	XLOC_011704	2RHet	1921599	1921599	1923490	1.45e-08	0.0493	DOC4_DM
2R_301543_INS	2.34e-11	0.0494	XLOC_011705	2RHet	1924263	1924263	1926950	1.45e-08	0.0493	DOC4_DM
2R_301543_INS	4.87e-11	0.0482	XLOC_011789	2RHet	3215567	3215567	3217239	1.45e-08	0.0493	DOC4_DM
2R_301543_INS	4.9e-10	0.0499	XLOC_011977	2RHet	1591609	1590552	1591609	1.45e-08	0.0493	DOC4_DM
2R_301543_INS	4.81e-11	0.0482	XLOC_012081	2RHet	3151739	3149849	3151739	1.45e-08	0.0493	DOC4_DM
2R_304507_SNP	2.23e-06	0.0499	XLOC_008884	2R	264145	262676	264145	1.62e-06	0.0493	DOC4_DM
2R_304507_SNP	1.1e-06	0.0441	XLOC_011704	2RHet	1921599	1921599	1923490	1.62e-06	0.0493	DOC4_DM
2R_304507_SNP	4.09e-08	0.0494	XLOC_011705	2RHet	1924263	1924263	1926950	1.62e-06	0.0493	DOC4_DM
2R_313234_SNP	1.3e-14	0.045	FBgn0046706	2RHet	3199376	3199376	3234607	3.12e-13	0.0493	DOC4_DM
[truncated: 1,552 more rows]

## Sheet: Table S8B
eQTL (Chromosome_Position)	Gene P-Value	Gene FDR	Gene FlyBase ID	Gene Chromosome	Gene Position	Gene Start	Gene End	TE P-Value	TE FDR	TE Sequence
2L_19607671_SNP	2.13e-06	0.0444	FBgn0032817	2L	19756904	19742817	19756904	2.94e-06	0.0497	Chouto_I
2L_19607671_SNP	1.12e-06	0.0499	XLOC_019452	3LHet	1208684	1207612	1208684	2.94e-06	0.0497	Chouto_I
2L_19607671_SNP	1.48e-06	0.0495	XLOC_019453	3LHet	1211316	1210022	1211316	2.94e-06	0.0497	Chouto_I
2L_20821262_INS	2.58e-06	0.0461	FBgn0032900	2L	20869854	20869854	20871565	8.75e-07	0.0499	Gypsy2-I_DM
2L_21816662_SNP	2.58e-08	0.0489	XLOC_002917	2L	21707738	21707738	21710553	7.98e-07	0.0495	ACCORD2_I
2L_21816662_SNP	1.65e-16	0.0498	XLOC_006359	2R	667741	667741	674254	7.98e-07	0.0495	ACCORD2_I
2L_21863214_SNP	1.21e-06	0.0489	XLOC_002917	2L	21707738	21707738	21710553	1.79e-07	0.0495	ACCORD2_I
2L_21863214_SNP	4.17e-16	0.0498	XLOC_006359	2R	667741	667741	674254	1.79e-07	0.0495	ACCORD2_I
2L_21934165_SNP	2.81e-06	0.0484	XLOC_006268	2R	21910	21910	24748	4.42e-07	0.0177	DOC4_DM
2L_21934165_SNP	8.44e-08	0.0479	XLOC_006282	2R	78321	78321	108264	4.42e-07	0.0177	DOC4_DM
2L_22024466_SNP	3.15e-07	0.0244	FBgn0262887	2L	22961737	22961737	22963456	3.37e-06	0.0177	DOC4_DM
2L_22052878_SNP	1.93e-07	0.0495	FBgn0267458	3L	553216	553216	553739	1.08e-07	0.0495	ACCORD2_I
2L_22052878_SNP	4.86e-07	0.0489	XLOC_002917	2L	21707738	21707738	21710553	1.08e-07	0.0495	ACCORD2_I
2L_22052878_SNP	1.9e-15	0.0498	XLOC_006359	2R	667741	667741	674254	1.08e-07	0.0495	ACCORD2_I
2L_22059495_SNP	9.43e-09	0.0498	XLOC_006359	2R	667741	667741	674254	2.16e-06	0.0495	ACCORD2_I
2L_22068133_SNP	1.38e-07	0.0499	FBgn0051703	2L	22104401	22102626	22104401	1.19e-06	0.0495	ACCORD2_I
2L_22068133_SNP	7.32e-07	0.0495	FBgn0267458	3L	553216	553216	553739	1.19e-06	0.0495	ACCORD2_I
2L_22068133_SNP	6.14e-12	0.0498	XLOC_006359	2R	667741	667741	674254	1.19e-06	0.0495	ACCORD2_I
2L_22068134_SNP	7.5e-08	0.0499	FBgn0051703	2L	22104401	22102626	22104401	2.93e-07	0.0495	ACCORD2_I
2L_22068134_SNP	3.73e-11	0.0498	XLOC_006359	2R	667741	667741	674254	2.93e-07	0.0495	ACCORD2_I
2L_22076849_INS	1.49e-06	0.0499	FBgn0051703	2L	22104401	22102626	22104401	2.09e-06	0.0495	ACCORD2_I
2L_22076849_INS	1.01e-06	0.0489	XLOC_002917	2L	21707738	21707738	21710553	2.09e-06	0.0495	ACCORD2_I
2L_22076849_INS	4.03e-09	0.0498	XLOC_006359	2R	667741	667741	674254	2.09e-06	0.0495	ACCORD2_I
2L_22082925_SNP	9.29e-17	0.0498	XLOC_006359	2R	667741	667741	674254	2.66e-09	0.0495	ACCORD2_I
2L_22088335_SNP	8.21e-10	0.0498	XLOC_006359	2R	667741	667741	674254	6.27e-07	0.0495	ACCORD2_I
2L_22090866_SNP	1.96e-06	0.0329	XLOC_011942	2RHet	1262608	1258487	1262608	9.47e-07	0.0495	ACCORD2_I
2L_22101048_DEL	3.22e-10	0.0498	XLOC_006359	2R	667741	667741	674254	6.21e-06	0.0205	S2_DM
2L_22101088_SNP	7.71e-06	0.0202	FBgn0040009	2L	22430400	22430400	22441183	7.04e-06	0.0205	S2_DM
2L_22123705_SNP	7.34e-08	0.0498	XLOC_006359	2R	667741	667741	674254	5.79e-06	0.0205	S2_DM
2L_22123725_SNP	5.7e-09	0.0498	XLOC_006359	2R	667741	667741	674254	1.67e-06	0.0205	S2_DM
2L_22125970_SNP	4.36e-08	0.0486	XLOC_011917	2RHet	973581	973122	973581	4.14e-08	0.0495	ACCORD2_I
2L_22125973_SNP	1.34e-07	0.0486	XLOC_011917	2RHet	973581	973122	973581	2.47e-07	0.0495	ACCORD2_I
2L_22137883_SNP	4e-09	0.0244	FBgn0262887	2L	22961737	22961737	22963456	1.1e-06	0.0177	DOC4_DM
2L_22175015_SNP	6.66e-11	0.0498	XLOC_006359	2R	667741	667741	674254	8.97e-07	0.0205	S2_DM
2L_22187144_SNP	5.97e-06	0.0244	FBgn0262887	2L	22961737	22961737	22963456	8.41e-06	0.0205	S2_DM
2L_22191113_SNP	1.62e-06	0.0202	FBgn0040009	2L	22430400	22430400	22441183	2.86e-06	0.0177	DOC4_DM
2L_22191113_SNP	9.43e-06	0.0244	FBgn0262887	2L	22961737	22961737	22963456	2.86e-06	0.0177	DOC4_DM
2L_22191124_SNP	7.92e-07	0.0202	FBgn0040009	2L	22430400	22430400	22441183	1.3e-06	0.0177	DOC4_DM
2L_22191124_SNP	7.92e-07	0.0202	FBgn0040009	2L	22430400	22430400	22441183	5.66e-06	0.0205	S2_DM
2L_22191124_SNP	2.14e-06	0.0244	FBgn0262887	2L	22961737	22961737	22963456	1.3e-06	0.0177	DOC4_DM
2L_22191124_SNP	2.14e-06	0.0244	FBgn0262887	2L	22961737	22961737	22963456	5.66e-06	0.0205	S2_DM
2L_22192823_SNP	5.23e-08	0.0499	XLOC_006357	2R	646865	646865	649506	8.53e-06	0.0177	DOC4_DM
2L_22192823_SNP	1.86e-07	0.0498	XLOC_006359	2R	667741	667741	674254	8.53e-06	0.0177	DOC4_DM
2L_22195251_SNP	2.99e-07	0.0499	FBgn0051703	2L	22104401	22102626	22104401	4.72e-06	0.0177	DOC4_DM
2L_22195823_SNP	6.96e-06	0.0202	FBgn0040009	2L	22430400	22430400	22441183	4.4e-06	0.0205	S2_DM
2L_22195823_SNP	1.38e-06	0.0499	FBgn0051703	2L	22104401	22102626	22104401	4.4e-06	0.0205	S2_DM
2L_22195823_SNP	1.22e-06	0.0489	XLOC_011853	2RHet	624599	623448	624599	4.4e-06	0.0205	S2_DM
2L_22209453_SNP	6.29e-06	0.0202	FBgn0040009	2L	22430400	22430400	22441183	6.29e-09	0.0177	DOC4_DM
2L_22209453_SNP	7.82e-06	0.0244	FBgn0262887	2L	22961737	22961737	22963456	6.29e-09	0.0177	DOC4_DM
2L_22209453_SNP	4.27e-08	0.0489	XLOC_011853	2RHet	624599	623448	624599	6.29e-09	0.0177	DOC4_DM
2L_22213783_SNP	1.89e-06	0.0495	FBgn0267458	3L	553216	553216	553739	6.09e-06	0.0205	S2_DM
2L_22213783_SNP	6.92e-11	0.0498	XLOC_006359	2R	667741	667741	674254	6.09e-06	0.0205	S2_DM
2L_22213783_SNP	5.86e-06	0.05	XLOC_011704	2RHet	1921599	1921599	1923490	6.09e-06	0.0205	S2_DM
2L_22214135_SNP	5.09e-08	0.0498	XLOC_006359	2R	667741	667741	674254	2.59e-06	0.0205	S2_DM
2L_22216660_SNP	5.69e-06	0.0244	FBgn0262887	2L	22961737	22961737	22963456	4.77e-06	0.0205	S2_DM
2L_22255745_SNP	1.56e-07	0.0202	FBgn0040009	2L	22430400	22430400	22441183	1.34e-07	0.0177	DOC4_DM
2L_22255745_SNP	1.56e-07	0.0202	FBgn0040009	2L	22430400	22430400	22441183	9.37e-07	0.0205	S2_DM
2L_22255745_SNP	3.21e-06	0.0244	FBgn0262887	2L	22961737	22961737	22963456	9.37e-07	0.0205	S2_DM
2L_22255745_SNP	3.21e-06	0.0244	FBgn0262887	2L	22961737	22961737	22963456	1.34e-07	0.0177	DOC4_DM
2L_22255745_SNP	1.32e-06	0.0484	XLOC_006268	2R	21910	21910	24748	9.37e-07	0.0205	S2_DM
2L_22255745_SNP	1.32e-06	0.0484	XLOC_006268	2R	21910	21910	24748	1.34e-07	0.0177	DOC4_DM
2L_22255745_SNP	3.36e-07	0.0489	XLOC_011853	2RHet	624599	623448	624599	1.34e-07	0.0177	DOC4_DM
2L_22255745_SNP	3.36e-07	0.0489	XLOC_011853	2RHet	624599	623448	624599	9.37e-07	0.0205	S2_DM
2L_22257349_SNP	3.36e-09	0.0202	FBgn0040009	2L	22430400	22430400	22441183	4.02e-07	0.0205	S2_DM
2L_22257349_SNP	4.95e-07	0.0244	FBgn0262887	2L	22961737	22961737	22963456	4.02e-07	0.0205	S2_DM
2L_22257349_SNP	2.48e-07	0.0484	XLOC_006268	2R	21910	21910	24748	4.02e-07	0.0205	S2_DM
2L_22257349_SNP	8.82e-08	0.0489	XLOC_011853	2RHet	624599	623448	624599	4.02e-07	0.0205	S2_DM
2L_22258620_SNP	1.93e-08	0.0202	FBgn0040009	2L	22430400	22430400	22441183	2.02e-06	0.0495	ACCORD2_I
2L_22263048_SNP	3.49e-08	0.0202	FBgn0040009	2L	22430400	22430400	22441183	1.19e-06	0.0495	ACCORD2_I
2L_22264462_SNP	4.62e-09	0.0202	FBgn0040009	2L	22430400	22430400	22441183	2.02e-07	0.0495	ACCORD2_I
2L_22264837_SNP	2.22e-09	0.0202	FBgn0040009	2L	22430400	22430400	22441183	1.84e-06	0.0495	ACCORD2_I
2L_22264837_SNP	3.07e-07	0.0499	XLOC_006357	2R	646865	646865	649506	1.84e-06	0.0495	ACCORD2_I
2L_22265163_SNP	1.76e-10	0.0202	FBgn0040009	2L	22430400	22430400	22441183	1.97e-07	0.0177	DOC4_DM
2L_22265163_SNP	1.76e-10	0.0202	FBgn0040009	2L	22430400	22430400	22441183	2.13e-07	0.0205	S2_DM
2L_22265163_SNP	2.93e-07	0.0244	FBgn0262887	2L	22961737	22961737	22963456	1.97e-07	0.0177	DOC4_DM
2L_22265163_SNP	2.93e-07	0.0244	FBgn0262887	2L	22961737	22961737	22963456	2.13e-07	0.0205	S2_DM
2L_22265163_SNP	8.36e-06	0.0484	XLOC_006268	2R	21910	21910	24748	1.97e-07	0.0177	DOC4_DM
2L_22265163_SNP	8.36e-06	0.0484	XLOC_006268	2R	21910	21910	24748	2.13e-07	0.0205	S2_DM
2L_22265163_SNP	1.78e-06	0.0499	XLOC_011651	2RHet	861402	861402	862533	1.97e-07	0.0177	DOC4_DM
2L_22265163_SNP	1.78e-06	0.0499	XLOC_011651	2RHet	861402	861402	862533	2.13e-07	0.0205	S2_DM
2L_22265163_SNP	5.57e-07	0.0489	XLOC_011853	2RHet	624599	623448	624599	2.13e-07	0.0205	S2_DM
2L_22265163_SNP	5.57e-07	0.0489	XLOC_011853	2RHet	624599	623448	624599	1.97e-07	0.0177	DOC4_DM
2L_22265172_SNP	1.43e-11	0.0202	FBgn0040009	2L	22430400	22430400	22441183	1.85e-07	0.0205	S2_DM
2L_22265172_SNP	1.43e-11	0.0202	FBgn0040009	2L	22430400	22430400	22441183	8.42e-07	0.0177	DOC4_DM
2L_22265172_SNP	4.14e-07	0.0244	FBgn0262887	2L	22961737	22961737	22963456	1.85e-07	0.0205	S2_DM
2L_22265172_SNP	4.14e-07	0.0244	FBgn0262887	2L	22961737	22961737	22963456	8.42e-07	0.0177	DOC4_DM
2L_22265172_SNP	7.23e-06	0.0484	XLOC_006268	2R	21910	21910	24748	1.85e-07	0.0205	S2_DM
2L_22265172_SNP	7.23e-06	0.0484	XLOC_006268	2R	21910	21910	24748	8.42e-07	0.0177	DOC4_DM
2L_22265172_SNP	6.42e-07	0.0489	XLOC_011853	2RHet	624599	623448	624599	1.85e-07	0.0205	S2_DM
2L_22265172_SNP	6.42e-07	0.0489	XLOC_011853	2RHet	624599	623448	624599	8.42e-07	0.0177	DOC4_DM
2L_22275446_SNP	1.47e-06	0.0486	XLOC_006064	2L	22615820	22615624	22615820	3.83e-06	0.0177	DOC4_DM
2L_22275446_SNP	7.94e-09	0.0496	XLOC_006067	2L	22624695	22624070	22624695	3.83e-06	0.0177	DOC4_DM
2L_22291137_SNP	4.33e-06	0.0462	FBgn0051702	2L	22071144	22071144	22072902	2.84e-06	0.0177	DOC4_DM
2L_22291137_SNP	1.75e-09	0.0496	XLOC_006067	2L	22624695	22624070	22624695	2.84e-06	0.0177	DOC4_DM
2L_22296801_SNP	2.37e-08	0.0202	FBgn0040009	2L	22430400	22430400	22441183	1.76e-06	0.0495	ACCORD2_I
2L_22296801_SNP	1.28e-08	0.0499	XLOC_006357	2R	646865	646865	649506	1.76e-06	0.0495	ACCORD2_I
2L_22296801_SNP	3.12e-07	0.0498	XLOC_006359	2R	667741	667741	674254	1.76e-06	0.0495	ACCORD2_I
2L_22305487_SNP	8.2e-08	0.0202	FBgn0040009	2L	22430400	22430400	22441183	1.94e-06	0.0495	ACCORD2_I
2L_22305487_SNP	2.8e-09	0.0481	XLOC_003090	2L	22975606	22975606	22978044	1.94e-06	0.0495	ACCORD2_I
2L_22307769_SNP	1.15e-06	0.0202	FBgn0040009	2L	22430400	22430400	22441183	2.19e-06	0.0495	ACCORD2_I
2L_22309555_DEL	8.59e-07	0.0202	FBgn0040009	2L	22430400	22430400	22441183	2.4e-06	0.0495	ACCORD2_I
2L_22309555_DEL	3.58e-07	0.0498	XLOC_006359	2R	667741	667741	674254	2.4e-06	0.0495	ACCORD2_I
2L_22312935_INS	1.44e-10	0.0486	XLOC_006064	2L	22615820	22615624	22615820	6.45e-06	0.0177	DOC4_DM
2L_22312935_INS	7.73e-20	0.0496	XLOC_006067	2L	22624695	22624070	22624695	6.45e-06	0.0177	DOC4_DM
2L_22312935_INS	5.89e-13	0.049	XLOC_006068	2L	22625280	22625013	22625280	6.45e-06	0.0177	DOC4_DM
2L_22314893_SNP	1.62e-06	0.05	XLOC_011704	2RHet	1921599	1921599	1923490	9.03e-06	0.0205	S2_DM
2L_22314945_SNP	8.87e-08	0.05	XLOC_011704	2RHet	1921599	1921599	1923490	2.61e-06	0.0205	S2_DM
2L_22314945_SNP	1.38e-06	0.0487	XLOC_011789	2RHet	3215567	3215567	3217239	2.61e-06	0.0205	S2_DM
2L_22319910_SNP	1.2e-07	0.0486	XLOC_006064	2L	22615820	22615624	22615820	2.51e-07	0.0177	DOC4_DM
2L_22319910_SNP	1.32e-14	0.0496	XLOC_006067	2L	22624695	22624070	22624695	2.51e-07	0.0177	DOC4_DM
2L_22319910_SNP	6.45e-08	0.049	XLOC_006068	2L	22625280	22625013	22625280	2.51e-07	0.0177	DOC4_DM
2L_22320006_SNP	1.81e-08	0.0496	XLOC_006067	2L	22624695	22624070	22624695	1.87e-07	0.0177	DOC4_DM
2L_22328149_SNP	6.67e-11	0.0202	FBgn0040009	2L	22430400	22430400	22441183	3.93e-07	0.0205	S2_DM
2L_22334737_SNP	5.12e-07	0.0495	FBgn0267458	3L	553216	553216	553739	5.33e-06	0.0205	S2_DM
2L_22334737_SNP	1.56e-11	0.0481	XLOC_003090	2L	22975606	22975606	22978044	5.33e-06	0.0205	S2_DM
2L_22334737_SNP	9.83e-07	0.0489	XLOC_006069	2L	22631282	22629381	22631282	5.33e-06	0.0205	S2_DM
2L_22334737_SNP	6.52e-09	0.0498	XLOC_006359	2R	667741	667741	674254	5.33e-06	0.0205	S2_DM
2L_22335927_SNP	4.68e-07	0.0486	XLOC_006064	2L	22615820	22615624	22615820	4.13e-07	0.0177	DOC4_DM
2L_22335927_SNP	6.35e-16	0.0496	XLOC_006067	2L	22624695	22624070	22624695	4.13e-07	0.0177	DOC4_DM
2L_22335927_SNP	8.63e-09	0.049	XLOC_006068	2L	22625280	22625013	22625280	4.13e-07	0.0177	DOC4_DM
2L_22343983_SNP	5.71e-11	0.0202	FBgn0040009	2L	22430400	22430400	22441183	1.44e-06	0.0205	S2_DM
2L_22343983_SNP	1.58e-09	0.0498	XLOC_003055	2L	22739320	22739320	22739796	1.44e-06	0.0205	S2_DM
2L_22344486_SNP	7.84e-07	0.0486	XLOC_006064	2L	22615820	22615624	22615820	6.62e-08	0.0177	DOC4_DM
2L_22344486_SNP	7.62e-14	0.0496	XLOC_006067	2L	22624695	22624070	22624695	6.62e-08	0.0177	DOC4_DM
2L_22344486_SNP	8.15e-08	0.049	XLOC_006068	2L	22625280	22625013	22625280	6.62e-08	0.0177	DOC4_DM
2L_22344879_SNP	2.25e-11	0.0486	XLOC_006064	2L	22615820	22615624	22615820	9.95e-07	0.0177	DOC4_DM
2L_22344879_SNP	6.18e-18	0.0496	XLOC_006067	2L	22624695	22624070	22624695	9.95e-07	0.0177	DOC4_DM
2L_22344879_SNP	7.6e-11	0.049	XLOC_006068	2L	22625280	22625013	22625280	9.95e-07	0.0177	DOC4_DM
2L_22347237_SNP	2.39e-07	0.0486	XLOC_006064	2L	22615820	22615624	22615820	5.7e-08	0.0177	DOC4_DM
2L_22347237_SNP	1.43e-14	0.0496	XLOC_006067	2L	22624695	22624070	22624695	5.7e-08	0.0177	DOC4_DM
2L_22347237_SNP	3.26e-08	0.049	XLOC_006068	2L	22625280	22625013	22625280	5.7e-08	0.0177	DOC4_DM
2L_22350143_INS	1.26e-12	0.0496	XLOC_006067	2L	22624695	22624070	22624695	4.5e-06	0.0177	DOC4_DM
2L_22350226_SNP	4.21e-08	0.0486	XLOC_006064	2L	22615820	22615624	22615820	5.6e-09	0.0177	DOC4_DM
2L_22350226_SNP	2.55e-14	0.0496	XLOC_006067	2L	22624695	22624070	22624695	5.6e-09	0.0177	DOC4_DM
2L_22350226_SNP	5.77e-07	0.049	XLOC_006068	2L	22625280	22625013	22625280	5.6e-09	0.0177	DOC4_DM
2L_22357748_SNP	1.24e-07	0.0486	XLOC_006064	2L	22615820	22615624	22615820	2.45e-08	0.0177	DOC4_DM
2L_22357748_SNP	2.58e-15	0.0496	XLOC_006067	2L	22624695	22624070	22624695	2.45e-08	0.0177	DOC4_DM
2L_22357748_SNP	4.99e-09	0.049	XLOC_006068	2L	22625280	22625013	22625280	2.45e-08	0.0177	DOC4_DM
2L_22360564_SNP	3.99e-07	0.0486	XLOC_006064	2L	22615820	22615624	22615820	1.81e-07	0.0177	DOC4_DM
2L_22360564_SNP	3.44e-14	0.0496	XLOC_006067	2L	22624695	22624070	22624695	1.81e-07	0.0177	DOC4_DM
2L_22360564_SNP	4.21e-07	0.049	XLOC_006068	2L	22625280	22625013	22625280	1.81e-07	0.0177	DOC4_DM
2L_22362248_INS	1.4e-11	0.0202	FBgn0040009	2L	22430400	22430400	22441183	4.54e-10	0.0205	S2_DM
2L_22369368_SNP	4.66e-09	0.0486	XLOC_006064	2L	22615820	22615624	22615820	9.58e-07	0.0177	DOC4_DM
2L_22369368_SNP	8.42e-19	0.0496	XLOC_006067	2L	22624695	22624070	22624695	9.58e-07	0.0177	DOC4_DM
2L_22369368_SNP	1.37e-11	0.049	XLOC_006068	2L	22625280	22625013	22625280	9.58e-07	0.0177	DOC4_DM
2L_22369368_SNP	3.03e-06	0.0499	XLOC_011651	2RHet	861402	861402	862533	9.58e-07	0.0177	DOC4_DM
2L_22371883_DEL	5.05e-10	0.0202	FBgn0040009	2L	22430400	22430400	22441183	1.11e-07	0.0205	S2_DM
2L_22373853_SNP	9.96e-12	0.0202	FBgn0040009	2L	22430400	22430400	22441183	1.81e-10	0.0205	S2_DM
2L_22373853_SNP	9.96e-12	0.0202	FBgn0040009	2L	22430400	22430400	22441183	9.11e-06	0.0177	DOC4_DM
2L_22373853_SNP	2.52e-06	0.0244	FBgn0262887	2L	22961737	22961737	22963456	1.81e-10	0.0205	S2_DM
2L_22373853_SNP	2.52e-06	0.0244	FBgn0262887	2L	22961737	22961737	22963456	9.11e-06	0.0177	DOC4_DM
2L_22373853_SNP	5.88e-07	0.0489	XLOC_011853	2RHet	624599	623448	624599	9.11e-06	0.0177	DOC4_DM
2L_22373853_SNP	5.88e-07	0.0489	XLOC_011853	2RHet	624599	623448	624599	1.81e-10	0.0205	S2_DM
2L_22373925_SNP	1.88e-12	0.0202	FBgn0040009	2L	22430400	22430400	22441183	4.75e-06	0.0177	DOC4_DM
2L_22373925_SNP	1.88e-12	0.0202	FBgn0040009	2L	22430400	22430400	22441183	8.44e-10	0.0205	S2_DM
2L_22374901_SNP	4.38e-14	0.0202	FBgn0040009	2L	22430400	22430400	22441183	1.52e-09	0.0205	S2_DM
2L_22374930_SNP	2.17e-14	0.0202	FBgn0040009	2L	22430400	22430400	22441183	3.54e-09	0.0205	S2_DM
2L_22375038_DEL	2.31e-12	0.0202	FBgn0040009	2L	22430400	22430400	22441183	6.15e-09	0.0205	S2_DM
2L_22391971_SNP	2.3e-12	0.0202	FBgn0040009	2L	22430400	22430400	22441183	1.6e-08	0.0205	S2_DM
2L_22392198_SNP	9.32e-09	0.0202	FBgn0040009	2L	22430400	22430400	22441183	3.97e-07	0.0205	S2_DM
2L_22394879_SNP	8.34e-16	0.0202	FBgn0040009	2L	22430400	22430400	22441183	3.44e-12	0.0205	S2_DM
2L_22394879_SNP	1.38e-06	0.0489	XLOC_011853	2RHet	624599	623448	624599	3.44e-12	0.0205	S2_DM
2L_22396405_SNP	4.35e-09	0.0486	XLOC_006064	2L	22615820	22615624	22615820	1.47e-06	0.0177	DOC4_DM
2L_22396405_SNP	1.58e-19	0.0496	XLOC_006067	2L	22624695	22624070	22624695	1.47e-06	0.0177	DOC4_DM
2L_22396405_SNP	1.49e-11	0.049	XLOC_006068	2L	22625280	22625013	22625280	1.47e-06	0.0177	DOC4_DM
2L_22398580_SNP	2.91e-07	0.0498	XLOC_003055	2L	22739320	22739320	22739796	3.71e-06	0.0497	Chouto_I
2L_22398581_SNP	1.34e-07	0.0498	XLOC_003055	2L	22739320	22739320	22739796	4.32e-06	0.0497	Chouto_I
2L_22406552_SNP	7.26e-07	0.0202	FBgn0040009	2L	22430400	22430400	22441183	3.91e-07	0.0205	S2_DM
2L_22406798_SNP	4.1e-09	0.0486	XLOC_006064	2L	22615820	22615624	22615820	6.82e-06	0.0177	DOC4_DM
2L_22406798_SNP	7.97e-18	0.0496	XLOC_006067	2L	22624695	22624070	22624695	6.82e-06	0.0177	DOC4_DM
2L_22406798_SNP	6.68e-10	0.049	XLOC_006068	2L	22625280	22625013	22625280	6.82e-06	0.0177	DOC4_DM
2L_22407120_SNP	6.06e-14	0.0202	FBgn0040009	2L	22430400	22430400	22441183	1.06e-08	0.0205	S2_DM
2L_22407120_SNP	4.53e-07	0.0489	XLOC_011853	2RHet	624599	623448	624599	1.06e-08	0.0205	S2_DM
2L_22407172_SNP	1.1e-11	0.0202	FBgn0040009	2L	22430400	22430400	22441183	2.93e-09	0.0205	S2_DM
2L_22420772_SNP	1.19e-12	0.0202	FBgn0040009	2L	22430400	22430400	22441183	9.97e-09	0.0205	S2_DM
2L_22420911_DEL	3.21e-10	0.0202	FBgn0040009	2L	22430400	22430400	22441183	1.87e-07	0.0205	S2_DM
2L_22422790_INS	8.44e-06	0.0202	FBgn0040009	2L	22430400	22430400	22441183	7.31e-07	0.0205	S2_DM
2L_22422790_INS	4.4e-07	0.0489	XLOC_011853	2RHet	624599	623448	624599	7.31e-07	0.0205	S2_DM
2L_22422988_SNP	5.44e-08	0.0202	FBgn0040009	2L	22430400	22430400	22441183	4.65e-06	0.0205	S2_DM
2L_22423527_DEL	1.92e-11	0.0202	FBgn0040009	2L	22430400	22430400	22441183	7e-08	0.0205	S2_DM
2L_22424143_SNP	5.87e-13	0.0202	FBgn0040009	2L	22430400	22430400	22441183	3.9e-08	0.0205	S2_DM
2L_22424600_SNP	8.06e-12	0.0202	FBgn0040009	2L	22430400	22430400	22441183	7.08e-06	0.0205	S2_DM
2L_22424600_SNP	5.86e-07	0.0489	XLOC_011853	2RHet	624599	623448	624599	7.08e-06	0.0205	S2_DM
2L_22424694_SNP	1.97e-11	0.0202	FBgn0040009	2L	22430400	22430400	22441183	4.95e-06	0.0205	S2_DM
2L_22425970_SNP	6.09e-09	0.0202	FBgn0040009	2L	22430400	22430400	22441183	1.24e-07	0.0205	S2_DM
2L_22426129_SNP	2.87e-19	0.0202	FBgn0040009	2L	22430400	22430400	22441183	1.94e-11	0.0205	S2_DM
2L_22426207_SNP	7.48e-14	0.0202	FBgn0040009	2L	22430400	22430400	22441183	2.93e-09	0.0205	S2_DM
2L_22426207_SNP	6.76e-07	0.0489	XLOC_011853	2RHet	624599	623448	624599	2.93e-09	0.0205	S2_DM
2L_22426737_INS	3.43e-06	0.0202	FBgn0040009	2L	22430400	22430400	22441183	9.97e-10	0.0205	S2_DM
2L_22426737_INS	8.93e-07	0.0489	XLOC_011853	2RHet	624599	623448	624599	9.97e-10	0.0205	S2_DM
2L_22426760_INS	1.05e-06	0.0202	FBgn0040009	2L	22430400	22430400	22441183	5.65e-10	0.0205	S2_DM
2L_22426760_INS	2.81e-07	0.0489	XLOC_011853	2RHet	624599	623448	624599	5.65e-10	0.0205	S2_DM
2L_22428318_SNP	6.82e-08	0.0202	FBgn0040009	2L	22430400	22430400	22441183	3.64e-06	0.0177	DOC4_DM
2L_22428318_SNP	1.19e-07	0.0499	XLOC_006357	2R	646865	646865	649506	3.64e-06	0.0177	DOC4_DM
2L_22432434_SNP	2.36e-10	0.0202	FBgn0040009	2L	22430400	22430400	22441183	1.49e-06	0.0205	S2_DM
2L_22432434_SNP	4.03e-07	0.0489	XLOC_011853	2RHet	624599	623448	624599	1.49e-06	0.0205	S2_DM
2L_22435149_SNP	7.42e-09	0.0496	XLOC_006067	2L	22624695	22624070	22624695	3.34e-06	0.0177	DOC4_DM
2L_22435149_SNP	1.93e-06	0.0499	XLOC_011651	2RHet	861402	861402	862533	3.34e-06	0.0177	DOC4_DM
2L_22435500_DEL	4.56e-06	0.0244	FBgn0262887	2L	22961737	22961737	22963456	2.85e-06	0.0177	DOC4_DM
2L_22435530_SNP	8.37e-07	0.0244	FBgn0262887	2L	22961737	22961737	22963456	3.06e-06	0.0177	DOC4_DM
2L_22435530_SNP	2.88e-07	0.0489	XLOC_006069	2L	22631282	22629381	22631282	3.06e-06	0.0177	DOC4_DM
2L_22435530_SNP	2.34e-06	0.05	XLOC_011704	2RHet	1921599	1921599	1923490	3.06e-06	0.0177	DOC4_DM
2L_22435870_SNP	2.5e-11	0.0496	XLOC_006067	2L	22624695	22624070	22624695	6.18e-09	0.0177	DOC4_DM
2L_22436025_SNP	1.33e-06	0.0486	XLOC_006064	2L	22615820	22615624	22615820	7.42e-10	0.0177	DOC4_DM
2L_22436025_SNP	3.28e-14	0.0496	XLOC_006067	2L	22624695	22624070	22624695	7.42e-10	0.0177	DOC4_DM
2L_22436200_SNP	1.15e-12	0.0486	XLOC_006064	2L	22615820	22615624	22615820	3.94e-06	0.0177	DOC4_DM
2L_22436200_SNP	5.12e-23	0.0496	XLOC_006067	2L	22624695	22624070	22624695	3.94e-06	0.0177	DOC4_DM
2L_22436200_SNP	1.63e-13	0.049	XLOC_006068	2L	22625280	22625013	22625280	3.94e-06	0.0177	DOC4_DM
2L_22436200_SNP	9.28e-07	0.0499	XLOC_011651	2RHet	861402	861402	862533	3.94e-06	0.0177	DOC4_DM
2L_22437990_SNP	2.84e-06	0.0202	FBgn0040009	2L	22430400	22430400	22441183	4.92e-06	0.0205	S2_DM
2L_22437990_SNP	1.54e-07	0.0489	XLOC_011853	2RHet	624599	623448	624599	4.92e-06	0.0205	S2_DM
2L_22438763_DEL	1.45e-13	0.0202	FBgn0040009	2L	22430400	22430400	22441183	8.97e-10	0.0205	S2_DM
2L_22438763_DEL	5.56e-06	0.0244	FBgn0262887	2L	22961737	22961737	22963456	8.97e-10	0.0205	S2_DM
2L_22439224_SNP	1.06e-14	0.0202	FBgn0040009	2L	22430400	22430400	22441183	3.36e-07	0.0205	S2_DM
2L_22439224_SNP	1.08e-06	0.0489	XLOC_006069	2L	22631282	22629381	22631282	3.36e-07	0.0205	S2_DM
2L_22439490_INS	7.12e-25	0.0202	FBgn0040009	2L	22430400	22430400	22441183	1.8e-06	0.0205	S2_DM
2L_22439495_SNP	4.15e-26	0.0202	FBgn0040009	2L	22430400	22430400	22441183	1.35e-06	0.0205	S2_DM
2L_22439496_SNP	9.75e-26	0.0202	FBgn0040009	2L	22430400	22430400	22441183	1.4e-06	0.0205	S2_DM
2L_22439497_INS	4.93e-25	0.0202	FBgn0040009	2L	22430400	22430400	22441183	4.9e-06	0.0205	S2_DM
2L_22439504_SNP	3e-25	0.0202	FBgn0040009	2L	22430400	22430400	22441183	4.37e-06	0.0205	S2_DM
2L_22439505_SNP	3.44e-25	0.0202	FBgn0040009	2L	22430400	22430400	22441183	6.64e-06	0.0205	S2_DM
2L_22440535_SNP	1.22e-14	0.0202	FBgn0040009	2L	22430400	22430400	22441183	2.63e-08	0.0205	S2_DM
2L_22440535_SNP	1.22e-14	0.0202	FBgn0040009	2L	22430400	22430400	22441183	6.86e-06	0.0177	DOC4_DM
2L_22442889_SNP	6.1e-14	0.0202	FBgn0040009	2L	22430400	22430400	22441183	1.04e-08	0.0205	S2_DM
2L_22442889_SNP	4.8e-07	0.0489	XLOC_011853	2RHet	624599	623448	624599	1.04e-08	0.0205	S2_DM
2L_22447182_SNP	1.96e-12	0.0202	FBgn0040009	2L	22430400	22430400	22441183	1.05e-06	0.0205	S2_DM
2L_22450293_SNP	1.73e-13	0.0202	FBgn0040009	2L	22430400	22430400	22441183	1.48e-08	0.0205	S2_DM
2L_22450293_SNP	1.75e-07	0.0489	XLOC_011853	2RHet	624599	623448	624599	1.48e-08	0.0205	S2_DM
2L_22452156_SNP	1.92e-14	0.0202	FBgn0040009	2L	22430400	22430400	22441183	2.48e-06	0.0177	DOC4_DM
2L_22452156_SNP	1.92e-14	0.0202	FBgn0040009	2L	22430400	22430400	22441183	6.32e-08	0.0205	S2_DM
2L_22452156_SNP	6.27e-07	0.0489	XLOC_011853	2RHet	624599	623448	624599	6.32e-08	0.0205	S2_DM
2L_22452156_SNP	6.27e-07	0.0489	XLOC_011853	2RHet	624599	623448	624599	2.48e-06	0.0177	DOC4_DM
2L_22465763_DEL	3.97e-11	0.0202	FBgn0040009	2L	22430400	22430400	22441183	1.02e-06	0.0205	S2_DM
2L_22465821_SNP	4.63e-12	0.0202	FBgn0040009	2L	22430400	22430400	22441183	2.95e-07	0.0205	S2_DM
2L_22465821_SNP	3.37e-07	0.0489	XLOC_011853	2RHet	624599	623448	624599	2.95e-07	0.0205	S2_DM
2L_22466278_SNP	2.35e-15	0.0202	FBgn0040009	2L	22430400	22430400	22441183	4.92e-08	0.0205	S2_DM
2L_22466278_SNP	8.85e-06	0.0244	FBgn0262887	2L	22961737	22961737	22963456	4.92e-08	0.0205	S2_DM
2L_22466447_SNP	2.59e-12	0.0202	FBgn0040009	2L	22430400	22430400	22441183	5.07e-08	0.0205	S2_DM
2L_22466448_SNP	4.04e-11	0.0202	FBgn0040009	2L	22430400	22430400	22441183	2.23e-06	0.0205	S2_DM
2L_22467943_SNP	9.91e-09	0.0202	FBgn0040009	2L	22430400	22430400	22441183	4.21e-07	0.0205	S2_DM
2L_22467943_SNP	7.73e-06	0.0244	FBgn0262887	2L	22961737	22961737	22963456	4.21e-07	0.0205	S2_DM
2L_22467943_SNP	6.07e-07	0.0499	XLOC_006357	2R	646865	646865	649506	4.21e-07	0.0205	S2_DM
2L_22470464_SNP	1.37e-10	0.0202	FBgn0040009	2L	22430400	22430400	22441183	1.57e-06	0.0205	S2_DM
2L_22471615_SNP	1.03e-09	0.0202	FBgn0040009	2L	22430400	22430400	22441183	5.49e-06	0.0205	S2_DM
2L_22474591_SNP	9.73e-10	0.0202	FBgn0040009	2L	22430400	22430400	22441183	2.34e-06	0.0205	S2_DM
2L_22476794_SNP	3.67e-06	0.0202	FBgn0040009	2L	22430400	22430400	22441183	1.35e-06	0.0205	S2_DM
2L_22476794_SNP	1.09e-09	0.05	XLOC_011704	2RHet	1921599	1921599	1923490	1.35e-06	0.0205	S2_DM
2L_22476794_SNP	5.05e-07	0.0494	XLOC_011705	2RHet	1924263	1924263	1926950	1.35e-06	0.0205	S2_DM
2L_22480565_SNP	6.16e-12	0.0202	FBgn0040009	2L	22430400	22430400	22441183	2.89e-07	0.0205	S2_DM
2L_22485546_SNP	2.13e-13	0.0202	FBgn0040009	2L	22430400	22430400	22441183	1.78e-07	0.0205	S2_DM
2L_22485546_SNP	2.13e-13	0.0202	FBgn0040009	2L	22430400	22430400	22441183	4.61e-07	0.0177	DOC4_DM
2L_22485546_SNP	8.79e-07	0.0489	XLOC_011853	2RHet	624599	623448	624599	4.61e-07	0.0177	DOC4_DM
2L_22485546_SNP	8.79e-07	0.0489	XLOC_011853	2RHet	624599	623448	624599	1.78e-07	0.0205	S2_DM
2L_22491402_DEL	2.77e-13	0.0202	FBgn0040009	2L	22430400	22430400	22441183	1.19e-08	0.0205	S2_DM
2L_22491402_DEL	2.77e-13	0.0202	FBgn0040009	2L	22430400	22430400	22441183	4.17e-06	0.0177	DOC4_DM
2L_22520361_SNP	3.31e-13	0.0202	FBgn0040009	2L	22430400	22430400	22441183	4.69e-07	0.0205	S2_DM
2L_22522508_SNP	3.67e-07	0.0484	XLOC_006268	2R	21910	21910	24748	3.42e-06	0.0177	DOC4_DM
2L_22524509_SNP	1.61e-15	0.0202	FBgn0040009	2L	22430400	22430400	22441183	9.63e-07	0.0177	DOC4_DM
2L_22524509_SNP	1.61e-15	0.0202	FBgn0040009	2L	22430400	22430400	22441183	6.84e-09	0.0205	S2_DM
2L_22524509_SNP	7.11e-07	0.0489	XLOC_011853	2RHet	624599	623448	624599	9.63e-07	0.0177	DOC4_DM
2L_22524509_SNP	7.11e-07	0.0489	XLOC_011853	2RHet	624599	623448	624599	6.84e-09	0.0205	S2_DM
2L_22527933_SNP	8.71e-10	0.05	XLOC_011704	2RHet	1921599	1921599	1923490	4.22e-06	0.0205	S2_DM
2L_22527933_SNP	2.35e-07	0.0494	XLOC_011705	2RHet	1924263	1924263	1926950	4.22e-06	0.0205	S2_DM
2L_22528760_SNP	5.21e-07	0.0202	FBgn0040009	2L	22430400	22430400	22441183	1.83e-07	0.0205	S2_DM
2L_22528760_SNP	1.95e-06	0.0495	FBgn0267458	3L	553216	553216	553739	1.83e-07	0.0205	S2_DM
2L_22528760_SNP	2.81e-11	0.05	XLOC_011704	2RHet	1921599	1921599	1923490	1.83e-07	0.0205	S2_DM
2L_22528760_SNP	7.53e-09	0.0494	XLOC_011705	2RHet	1924263	1924263	1926950	1.83e-07	0.0205	S2_DM
2L_22528760_SNP	2.81e-06	0.0488	XLOC_011977	2RHet	1591609	1590552	1591609	1.83e-07	0.0205	S2_DM
2L_22530125_SNP	4.7e-17	0.0202	FBgn0040009	2L	22430400	22430400	22441183	2.88e-11	0.0205	S2_DM
2L_22530125_SNP	4.7e-17	0.0202	FBgn0040009	2L	22430400	22430400	22441183	1.44e-06	0.0177	DOC4_DM
2L_22530125_SNP	2.12e-06	0.0244	FBgn0262887	2L	22961737	22961737	22963456	2.88e-11	0.0205	S2_DM
2L_22530125_SNP	2.12e-06	0.0244	FBgn0262887	2L	22961737	22961737	22963456	1.44e-06	0.0177	DOC4_DM
2L_22530125_SNP	1.39e-07	0.0498	XLOC_003055	2L	22739320	22739320	22739796	2.88e-11	0.0205	S2_DM
2L_22530125_SNP	1.39e-07	0.0498	XLOC_003055	2L	22739320	22739320	22739796	1.44e-06	0.0177	DOC4_DM
2L_22530125_SNP	1.71e-07	0.0489	XLOC_011853	2RHet	624599	623448	624599	2.88e-11	0.0205	S2_DM
2L_22530125_SNP	1.71e-07	0.0489	XLOC_011853	2RHet	624599	623448	624599	1.44e-06	0.0177	DOC4_DM
2L_22532951_SNP	1.12e-09	0.0486	XLOC_006064	2L	22615820	22615624	22615820	2.33e-06	0.0177	DOC4_DM
2L_22532951_SNP	1.8e-18	0.0496	XLOC_006067	2L	22624695	22624070	22624695	2.33e-06	0.0177	DOC4_DM
2L_22532951_SNP	5.55e-09	0.049	XLOC_006068	2L	22625280	22625013	22625280	2.33e-06	0.0177	DOC4_DM
2L_22533524_SNP	7.6e-07	0.0202	FBgn0040009	2L	22430400	22430400	22441183	5.45e-06	0.0205	S2_DM
2L_22533524_SNP	1.07e-11	0.0481	XLOC_003090	2L	22975606	22975606	22978044	5.45e-06	0.0205	S2_DM
2L_22534155_SNP	3.27e-06	0.0202	FBgn0040009	2L	22430400	22430400	22441183	1.59e-06	0.0205	S2_DM
2L_22534155_SNP	9.75e-11	0.0481	XLOC_003090	2L	22975606	22975606	22978044	1.59e-06	0.0205	S2_DM
2L_22534155_SNP	2.97e-07	0.0489	XLOC_006069	2L	22631282	22629381	22631282	1.59e-06	0.0205	S2_DM
2L_22534155_SNP	3.71e-08	0.05	XLOC_011704	2RHet	1921599	1921599	1923490	1.59e-06	0.0205	S2_DM
2L_22536507_SNP	1.69e-14	0.0202	FBgn0040009	2L	22430400	22430400	22441183	2.58e-06	0.0177	DOC4_DM
2L_22536507_SNP	1.69e-14	0.0202	FBgn0040009	2L	22430400	22430400	22441183	3.42e-09	0.0205	S2_DM
2L_22537821_DEL	4.97e-14	0.0202	FBgn0040009	2L	22430400	22430400	22441183	8.31e-06	0.0177	DOC4_DM
2L_22537821_DEL	4.97e-14	0.0202	FBgn0040009	2L	22430400	22430400	22441183	9.67e-09	0.0205	S2_DM
2L_22537900_INS	3.23e-12	0.0202	FBgn0040009	2L	22430400	22430400	22441183	3.29e-08	0.0205	S2_DM
2L_22539111_SNP	1.8e-11	0.0202	FBgn0040009	2L	22430400	22430400	22441183	4.4e-08	0.0205	S2_DM
2L_22551643_SNP	3.87e-10	0.0202	FBgn0040009	2L	22430400	22430400	22441183	8.35e-07	0.0205	S2_DM
2L_22554214_SNP	3.27e-10	0.0202	FBgn0040009	2L	22430400	22430400	22441183	1.47e-07	0.0205	S2_DM
2L_22554214_SNP	1.25e-06	0.0489	XLOC_011853	2RHet	624599	623448	624599	1.47e-07	0.0205	S2_DM
2L_22555616_SNP	2.38e-10	0.0486	XLOC_006064	2L	22615820	22615624	22615820	3.42e-06	0.0177	DOC4_DM
2L_22555616_SNP	1.47e-20	0.0496	XLOC_006067	2L	22624695	22624070	22624695	3.42e-06	0.0177	DOC4_DM
2L_22555616_SNP	8.86e-10	0.049	XLOC_006068	2L	22625280	22625013	22625280	3.42e-06	0.0177	DOC4_DM
2L_22557128_SNP	7.79e-06	0.0202	FBgn0040009	2L	22430400	22430400	22441183	8.45e-06	0.0177	DOC4_DM
2L_22557128_SNP	6.99e-07	0.0486	XLOC_006064	2L	22615820	22615624	22615820	8.45e-06	0.0177	DOC4_DM
2L_22557128_SNP	1.64e-12	0.0496	XLOC_006067	2L	22624695	22624070	22624695	8.45e-06	0.0177	DOC4_DM
2L_22557128_SNP	4.4e-09	0.049	XLOC_006068	2L	22625280	22625013	22625280	8.45e-06	0.0177	DOC4_DM
2L_22558747_DEL	4.11e-12	0.0202	FBgn0040009	2L	22430400	22430400	22441183	9.9e-10	0.0205	S2_DM
2L_22558747_DEL	5.89e-08	0.05	XLOC_011704	2RHet	1921599	1921599	1923490	9.9e-10	0.0205	S2_DM
2L_22562500_SNP	4.09e-10	0.0244	FBgn0262887	2L	22961737	22961737	22963456	7.62e-07	0.0205	S2_DM
2L_22562516_SNP	5.06e-07	0.0489	FBgn0039993	U	1178801	1178801	1184774	1.54e-06	0.0205	S2_DM
2L_22562516_SNP	1.76e-08	0.0244	FBgn0262887	2L	22961737	22961737	22963456	1.54e-06	0.0205	S2_DM
2L_22563715_SNP	2.65e-10	0.0202	FBgn0040009	2L	22430400	22430400	22441183	2.74e-06	0.0177	DOC4_DM
2L_22563715_SNP	2.65e-10	0.0202	FBgn0040009	2L	22430400	22430400	22441183	1.48e-10	0.0205	S2_DM
2L_22563715_SNP	6.2e-06	0.0244	FBgn0262887	2L	22961737	22961737	22963456	1.48e-10	0.0205	S2_DM
2L_22563715_SNP	6.2e-06	0.0244	FBgn0262887	2L	22961737	22961737	22963456	2.74e-06	0.0177	DOC4_DM
2L_22563715_SNP	2.7e-06	0.0499	XLOC_011651	2RHet	861402	861402	862533	1.48e-10	0.0205	S2_DM
2L_22563715_SNP	2.7e-06	0.0499	XLOC_011651	2RHet	861402	861402	862533	2.74e-06	0.0177	DOC4_DM
2L_22563715_SNP	8.01e-07	0.0489	XLOC_011853	2RHet	624599	623448	624599	2.74e-06	0.0177	DOC4_DM
2L_22563715_SNP	8.01e-07	0.0489	XLOC_011853	2RHet	624599	623448	624599	1.48e-10	0.0205	S2_DM
2L_22566734_INS	5.29e-07	0.0244	FBgn0262887	2L	22961737	22961737	22963456	5.98e-09	0.0205	S2_DM
2L_22566734_INS	5.29e-07	0.0244	FBgn0262887	2L	22961737	22961737	22963456	2.2e-07	0.0177	DOC4_DM
2L_22566734_INS	3.42e-06	0.0484	XLOC_006268	2R	21910	21910	24748	5.98e-09	0.0205	S2_DM
2L_22566734_INS	3.42e-06	0.0484	XLOC_006268	2R	21910	21910	24748	2.2e-07	0.0177	DOC4_DM
2L_22566734_INS	9.01e-08	0.0499	XLOC_011651	2RHet	861402	861402	862533	2.2e-07	0.0177	DOC4_DM
2L_22566734_INS	9.01e-08	0.0499	XLOC_011651	2RHet	861402	861402	862533	5.98e-09	0.0205	S2_DM
2L_22566847_SNP	1.06e-07	0.0484	XLOC_006268	2R	21910	21910	24748	5.19e-08	0.0205	S2_DM
2L_22566847_SNP	1.06e-07	0.0484	XLOC_006268	2R	21910	21910	24748	3.63e-06	0.0177	DOC4_DM
2L_22566847_SNP	2.51e-06	0.0499	XLOC_011651	2RHet	861402	861402	862533	5.19e-08	0.0205	S2_DM
2L_22566847_SNP	2.51e-06	0.0499	XLOC_011651	2RHet	861402	861402	862533	3.63e-06	0.0177	DOC4_DM
2L_22566847_SNP	2.16e-09	0.05	XLOC_011704	2RHet	1921599	1921599	1923490	3.63e-06	0.0177	DOC4_DM
2L_22566847_SNP	2.16e-09	0.05	XLOC_011704	2RHet	1921599	1921599	1923490	5.19e-08	0.0205	S2_DM
2L_22566852_DEL	2.34e-06	0.0484	XLOC_006268	2R	21910	21910	24748	3.12e-06	0.0177	DOC4_DM
2L_22566852_DEL	2.34e-06	0.0484	XLOC_006268	2R	21910	21910	24748	2.37e-07	0.0205	S2_DM
2L_22566852_DEL	2.72e-06	0.0499	XLOC_011651	2RHet	861402	861402	862533	2.37e-07	0.0205	S2_DM
2L_22566852_DEL	2.72e-06	0.0499	XLOC_011651	2RHet	861402	861402	862533	3.12e-06	0.0177	DOC4_DM
2L_22566852_DEL	4.34e-07	0.05	XLOC_011704	2RHet	1921599	1921599	1923490	2.37e-07	0.0205	S2_DM
2L_22566852_DEL	4.34e-07	0.05	XLOC_011704	2RHet	1921599	1921599	1923490	3.12e-06	0.0177	DOC4_DM
2L_22566878_SNP	1.04e-07	0.0484	XLOC_006268	2R	21910	21910	24748	4.37e-08	0.0205	S2_DM
2L_22566878_SNP	1.04e-07	0.0484	XLOC_006268	2R	21910	21910	24748	1.25e-06	0.0177	DOC4_DM
2L_22566878_SNP	2.54e-06	0.0499	XLOC_011651	2RHet	861402	861402	862533	1.25e-06	0.0177	DOC4_DM
2L_22566878_SNP	2.54e-06	0.0499	XLOC_011651	2RHet	861402	861402	862533	4.37e-08	0.0205	S2_DM
2L_22566878_SNP	7.31e-09	0.05	XLOC_011704	2RHet	1921599	1921599	1923490	1.25e-06	0.0177	DOC4_DM
2L_22566878_SNP	7.31e-09	0.05	XLOC_011704	2RHet	1921599	1921599	1923490	4.37e-08	0.0205	S2_DM
2L_22567588_SNP	4.04e-09	0.0202	FBgn0040009	2L	22430400	22430400	22441183	1.22e-11	0.0205	S2_DM
2L_22567728_SNP	1.08e-06	0.0202	FBgn0040009	2L	22430400	22430400	22441183	3.8e-07	0.0177	DOC4_DM
2L_22567728_SNP	2.65e-07	0.0489	XLOC_011853	2RHet	624599	623448	624599	3.8e-07	0.0177	DOC4_DM
2L_22568630_SNP	5.85e-06	0.0202	FBgn0040009	2L	22430400	22430400	22441183	5.36e-07	0.0205	S2_DM
2L_22568630_SNP	7.33e-07	0.0489	XLOC_006069	2L	22631282	22629381	22631282	5.36e-07	0.0205	S2_DM
2L_22568630_SNP	1.6e-09	0.05	XLOC_011704	2RHet	1921599	1921599	1923490	5.36e-07	0.0205	S2_DM
2L_22568630_SNP	1.32e-07	0.0494	XLOC_011705	2RHet	1924263	1924263	1926950	5.36e-07	0.0205	S2_DM
2L_22568630_SNP	1.89e-06	0.0488	XLOC_011977	2RHet	1591609	1590552	1591609	5.36e-07	0.0205	S2_DM
2L_22569101_SNP	1.25e-11	0.0202	FBgn0040009	2L	22430400	22430400	22441183	5.07e-08	0.0205	S2_DM
2L_22569650_SNP	1.05e-13	0.0202	FBgn0040009	2L	22430400	22430400	22441183	6.98e-06	0.0177	DOC4_DM
2L_22569650_SNP	1.05e-13	0.0202	FBgn0040009	2L	22430400	22430400	22441183	1.18e-09	0.0205	S2_DM
2L_22572528_SNP	6.27e-14	0.0202	FBgn0040009	2L	22430400	22430400	22441183	4.46e-09	0.0205	S2_DM
2L_22577616_INS	1.26e-08	0.0202	FBgn0040009	2L	22430400	22430400	22441183	3.62e-07	0.0177	DOC4_DM
2L_22577616_INS	1.26e-08	0.0202	FBgn0040009	2L	22430400	22430400	22441183	3.56e-06	0.0205	S2_DM
2L_22577616_INS	1.12e-07	0.0484	XLOC_006268	2R	21910	21910	24748	3.56e-06	0.0205	S2_DM
2L_22577616_INS	1.12e-07	0.0484	XLOC_006268	2R	21910	21910	24748	3.62e-07	0.0177	DOC4_DM
2L_22577621_SNP	4.35e-14	0.0202	FBgn0040009	2L	22430400	22430400	22441183	7.97e-10	0.0205	S2_DM
2L_22577621_SNP	6.3e-06	0.0244	FBgn0262887	2L	22961737	22961737	22963456	7.97e-10	0.0205	S2_DM
2L_22577810_SNP	3.33e-11	0.0202	FBgn0040009	2L	22430400	22430400	22441183	1.22e-08	0.0205	S2_DM
2L_22578302_SNP	4.99e-07	0.0202	FBgn0040009	2L	22430400	22430400	22441183	2.88e-06	0.0177	DOC4_DM
2L_22578302_SNP	4.99e-07	0.0202	FBgn0040009	2L	22430400	22430400	22441183	5.65e-07	0.0205	S2_DM
2L_22578302_SNP	5.75e-06	0.05	XLOC_011704	2RHet	1921599	1921599	1923490	5.65e-07	0.0205	S2_DM
2L_22578302_SNP	5.75e-06	0.05	XLOC_011704	2RHet	1921599	1921599	1923490	2.88e-06	0.0177	DOC4_DM
2L_22578576_SNP	4.19e-13	0.0202	FBgn0040009	2L	22430400	22430400	22441183	3.42e-09	0.0205	S2_DM
2L_22578576_SNP	4.19e-13	0.0202	FBgn0040009	2L	22430400	22430400	22441183	2.21e-06	0.0177	DOC4_DM
2L_22578576_SNP	1.21e-07	0.0489	XLOC_011853	2RHet	624599	623448	624599	3.42e-09	0.0205	S2_DM
2L_22578576_SNP	1.21e-07	0.0489	XLOC_011853	2RHet	624599	623448	624599	2.21e-06	0.0177	DOC4_DM
2L_22578577_SNP	2.04e-14	0.0202	FBgn0040009	2L	22430400	22430400	22441183	9.38e-10	0.0205	S2_DM
2L_22578577_SNP	2.04e-14	0.0202	FBgn0040009	2L	22430400	22430400	22441183	2.65e-06	0.0177	DOC4_DM
2L_22578577_SNP	1.31e-07	0.0498	XLOC_003055	2L	22739320	22739320	22739796	2.65e-06	0.0177	DOC4_DM
2L_22578577_SNP	1.31e-07	0.0498	XLOC_003055	2L	22739320	22739320	22739796	9.38e-10	0.0205	S2_DM
2L_22578577_SNP	2.19e-07	0.0489	XLOC_011853	2RHet	624599	623448	624599	2.65e-06	0.0177	DOC4_DM
2L_22578577_SNP	2.19e-07	0.0489	XLOC_011853	2RHet	624599	623448	624599	9.38e-10	0.0205	S2_DM
2L_22579053_SNP	2.22e-16	0.0202	FBgn0040009	2L	22430400	22430400	22441183	6.19e-11	0.0205	S2_DM
2L_22579053_SNP	2.22e-16	0.0202	FBgn0040009	2L	22430400	22430400	22441183	7.48e-07	0.0177	DOC4_DM
2L_22579053_SNP	1.76e-06	0.0244	FBgn0262887	2L	22961737	22961737	22963456	6.19e-11	0.0205	S2_DM
2L_22579053_SNP	1.76e-06	0.0244	FBgn0262887	2L	22961737	22961737	22963456	7.48e-07	0.0177	DOC4_DM
2L_22579053_SNP	2.6e-07	0.0498	XLOC_003055	2L	22739320	22739320	22739796	6.19e-11	0.0205	S2_DM
2L_22579053_SNP	2.6e-07	0.0498	XLOC_003055	2L	22739320	22739320	22739796	7.48e-07	0.0177	DOC4_DM
2L_22579053_SNP	1.9e-06	0.0499	XLOC_011651	2RHet	861402	861402	862533	6.19e-11	0.0205	S2_DM
2L_22579053_SNP	1.9e-06	0.0499	XLOC_011651	2RHet	861402	861402	862533	7.48e-07	0.0177	DOC4_DM
2L_22579053_SNP	3.37e-07	0.0489	XLOC_011853	2RHet	624599	623448	624599	6.19e-11	0.0205	S2_DM
2L_22579053_SNP	3.37e-07	0.0489	XLOC_011853	2RHet	624599	623448	624599	7.48e-07	0.0177	DOC4_DM
2L_22579058_SNP	9.52e-17	0.0202	FBgn0040009	2L	22430400	22430400	22441183	4.08e-07	0.0177	DOC4_DM
2L_22579058_SNP	9.52e-17	0.0202	FBgn0040009	2L	22430400	22430400	22441183	2.14e-12	0.0205	S2_DM
2L_22579058_SNP	1.16e-06	0.0244	FBgn0262887	2L	22961737	22961737	22963456	4.08e-07	0.0177	DOC4_DM
2L_22579058_SNP	1.16e-06	0.0244	FBgn0262887	2L	22961737	22961737	22963456	2.14e-12	0.0205	S2_DM
2L_22579058_SNP	2.9e-08	0.0498	XLOC_003055	2L	22739320	22739320	22739796	2.14e-12	0.0205	S2_DM
2L_22579058_SNP	2.9e-08	0.0498	XLOC_003055	2L	22739320	22739320	22739796	4.08e-07	0.0177	DOC4_DM
2L_22579210_SNP	1.02e-07	0.0202	FBgn0040009	2L	22430400	22430400	22441183	2.94e-09	0.0205	S2_DM
2L_22579210_SNP	1.28e-11	0.05	XLOC_011704	2RHet	1921599	1921599	1923490	2.94e-09	0.0205	S2_DM
2L_22579210_SNP	9.02e-09	0.0494	XLOC_011705	2RHet	1924263	1924263	1926950	2.94e-09	0.0205	S2_DM
2L_22579210_SNP	7.46e-07	0.0488	XLOC_011977	2RHet	1591609	1590552	1591609	2.94e-09	0.0205	S2_DM
2L_22579233_SNP	3.06e-07	0.05	XLOC_011704	2RHet	1921599	1921599	1923490	1.35e-06	0.0205	S2_DM
2L_22579552_SNP	2.01e-09	0.0496	XLOC_006067	2L	22624695	22624070	22624695	2.21e-06	0.0177	DOC4_DM
2L_22579917_SNP	2.34e-08	0.0202	FBgn0040009	2L	22430400	22430400	22441183	1.51e-07	0.0205	S2_DM
2L_22579917_SNP	5.96e-07	0.05	XLOC_011704	2RHet	1921599	1921599	1923490	1.51e-07	0.0205	S2_DM
2L_22579936_SNP	1.9e-09	0.0202	FBgn0040009	2L	22430400	22430400	22441183	1.51e-08	0.0205	S2_DM
2L_22579936_SNP	5.53e-06	0.05	XLOC_011704	2RHet	1921599	1921599	1923490	1.51e-08	0.0205	S2_DM
2L_22580011_DEL	6.84e-14	0.0202	FBgn0040009	2L	22430400	22430400	22441183	1.99e-06	0.0177	DOC4_DM
2L_22580011_DEL	6.84e-14	0.0202	FBgn0040009	2L	22430400	22430400	22441183	1.87e-10	0.0205	S2_DM
2L_22580011_DEL	8.87e-09	0.05	XLOC_011704	2RHet	1921599	1921599	1923490	1.99e-06	0.0177	DOC4_DM
2L_22580011_DEL	8.87e-09	0.05	XLOC_011704	2RHet	1921599	1921599	1923490	1.87e-10	0.0205	S2_DM
2L_22580108_DEL	3.06e-12	0.0202	FBgn0040009	2L	22430400	22430400	22441183	1.28e-10	0.0205	S2_DM
2L_22580108_DEL	3.06e-12	0.0202	FBgn0040009	2L	22430400	22430400	22441183	6.87e-06	0.0177	DOC4_DM
2L_22580108_DEL	7.66e-08	0.05	XLOC_011704	2RHet	1921599	1921599	1923490	6.87e-06	0.0177	DOC4_DM
2L_22580108_DEL	7.66e-08	0.05	XLOC_011704	2RHet	1921599	1921599	1923490	1.28e-10	0.0205	S2_DM
2L_22580491_SNP	5.83e-06	0.0202	FBgn0040009	2L	22430400	22430400	22441183	1.75e-07	0.0205	S2_DM
2L_22580491_SNP	3.04e-08	0.0498	XLOC_006359	2R	667741	667741	674254	1.75e-07	0.0205	S2_DM
2L_22580491_SNP	2.81e-06	0.05	XLOC_011704	2RHet	1921599	1921599	1923490	1.75e-07	0.0205	S2_DM
2L_22580615_SNP	4.11e-08	0.0202	FBgn0040009	2L	22430400	22430400	22441183	1.2e-06	0.0205	S2_DM
2L_22580615_SNP	1.4e-06	0.05	XLOC_011704	2RHet	1921599	1921599	1923490	1.2e-06	0.0205	S2_DM
2L_22581632_SNP	8.81e-11	0.0202	FBgn0040009	2L	22430400	22430400	22441183	2.84e-09	0.0205	S2_DM
2L_22581632_SNP	1.04e-06	0.05	XLOC_011704	2RHet	1921599	1921599	1923490	2.84e-09	0.0205	S2_DM
2L_22581878_SNP	1.74e-06	0.0202	FBgn0040009	2L	22430400	22430400	22441183	1.74e-08	0.0205	S2_DM
2L_22581878_SNP	4.6e-10	0.05	XLOC_011704	2RHet	1921599	1921599	1923490	1.74e-08	0.0205	S2_DM
2L_22581878_SNP	2.81e-07	0.0494	XLOC_011705	2RHet	1924263	1924263	1926950	1.74e-08	0.0205	S2_DM
2L_22581895_SNP	3.11e-06	0.0202	FBgn0040009	2L	22430400	22430400	22441183	8.08e-08	0.0205	S2_DM
2L_22581895_SNP	3.31e-09	0.05	XLOC_011704	2RHet	1921599	1921599	1923490	8.08e-08	0.0205	S2_DM
2L_22581895_SNP	1.84e-06	0.0494	XLOC_011705	2RHet	1924263	1924263	1926950	8.08e-08	0.0205	S2_DM
2L_22582113_SNP	4.4e-07	0.0484	XLOC_006268	2R	21910	21910	24748	3.06e-06	0.0205	S2_DM
2L_22582113_SNP	4.4e-07	0.0484	XLOC_006268	2R	21910	21910	24748	5.25e-06	0.0177	DOC4_DM
2L_22582920_SNP	4.09e-08	0.0484	XLOC_006268	2R	21910	21910	24748	6.64e-08	0.0177	DOC4_DM
2L_22582920_SNP	4.09e-08	0.0484	XLOC_006268	2R	21910	21910	24748	1.79e-06	0.0205	S2_DM
2L_22582942_SNP	4.91e-10	0.0202	FBgn0040009	2L	22430400	22430400	22441183	5.63e-08	0.0205	S2_DM
2L_22582942_SNP	1.22e-06	0.05	XLOC_011704	2RHet	1921599	1921599	1923490	5.63e-08	0.0205	S2_DM
2L_22583174_SNP	4.69e-09	0.0484	XLOC_006268	2R	21910	21910	24748	7.68e-09	0.0177	DOC4_DM
2L_22583174_SNP	4.69e-09	0.0484	XLOC_006268	2R	21910	21910	24748	3.2e-06	0.0205	S2_DM
2L_22583174_SNP	1e-06	0.0499	XLOC_011651	2RHet	861402	861402	862533	7.68e-09	0.0177	DOC4_DM
2L_22583174_SNP	1e-06	0.0499	XLOC_011651	2RHet	861402	861402	862533	3.2e-06	0.0205	S2_DM
2L_22583560_SNP	4.2e-09	0.0202	FBgn0040009	2L	22430400	22430400	22441183	1.22e-07	0.0205	S2_DM
2L_22583560_SNP	4.34e-06	0.05	XLOC_011704	2RHet	1921599	1921599	1923490	1.22e-07	0.0205	S2_DM
2L_22583750_INS	2.22e-07	0.0202	FBgn0040009	2L	22430400	22430400	22441183	8.32e-06	0.0177	DOC4_DM
2L_22583750_INS	4.57e-07	0.0244	FBgn0262887	2L	22961737	22961737	22963456	8.32e-06	0.0177	DOC4_DM
2L_22583760_SNP	5.49e-12	0.0202	FBgn0040009	2L	22430400	22430400	22441183	7.23e-09	0.0205	S2_DM
2L_22583760_SNP	4.71e-06	0.0244	FBgn0262887	2L	22961737	22961737	22963456	7.23e-09	0.0205	S2_DM
2L_22583862_SNP	3.71e-13	0.0202	FBgn0040009	2L	22430400	22430400	22441183	1.85e-08	0.0205	S2_DM
2L_22583862_SNP	2.44e-06	0.0244	FBgn0262887	2L	22961737	22961737	22963456	1.85e-08	0.0205	S2_DM
2L_22583921_SNP	1.07e-13	0.0202	FBgn0040009	2L	22430400	22430400	22441183	7.34e-09	0.0205	S2_DM
2L_22583921_SNP	3.69e-06	0.0244	FBgn0262887	2L	22961737	22961737	22963456	7.34e-09	0.0205	S2_DM
2L_22583951_SNP	2.65e-11	0.0202	FBgn0040009	2L	22430400	22430400	22441183	1.6e-08	0.0205	S2_DM
2L_22583951_SNP	3.79e-06	0.0244	FBgn0262887	2L	22961737	22961737	22963456	1.6e-08	0.0205	S2_DM
2L_22584119_SNP	1.45e-12	0.0202	FBgn0040009	2L	22430400	22430400	22441183	5.8e-09	0.0205	S2_DM
2L_22584622_INS	9.29e-09	0.0484	XLOC_006268	2R	21910	21910	24748	3.38e-08	0.0177	DOC4_DM
2L_22584622_INS	9.29e-09	0.0484	XLOC_006268	2R	21910	21910	24748	2.72e-06	0.0205	S2_DM
2L_22584622_INS	1.24e-06	0.0499	XLOC_011651	2RHet	861402	861402	862533	3.38e-08	0.0177	DOC4_DM
2L_22584622_INS	1.24e-06	0.0499	XLOC_011651	2RHet	861402	861402	862533	2.72e-06	0.0205	S2_DM
2L_22584823_SNP	8.29e-10	0.0202	FBgn0040009	2L	22430400	22430400	22441183	2.73e-11	0.0177	DOC4_DM
2L_22584823_SNP	8.29e-10	0.0202	FBgn0040009	2L	22430400	22430400	22441183	2.44e-08	0.0205	S2_DM
2L_22584823_SNP	3.26e-07	0.0244	FBgn0262887	2L	22961737	22961737	22963456	2.44e-08	0.0205	S2_DM
2L_22584823_SNP	3.26e-07	0.0244	FBgn0262887	2L	22961737	22961737	22963456	2.73e-11	0.0177	DOC4_DM
2L_22584823_SNP	1.76e-07	0.0484	XLOC_006268	2R	21910	21910	24748	2.44e-08	0.0205	S2_DM
2L_22584823_SNP	1.76e-07	0.0484	XLOC_006268	2R	21910	21910	24748	2.73e-11	0.0177	DOC4_DM
2L_22584823_SNP	1.93e-06	0.0499	XLOC_011651	2RHet	861402	861402	862533	2.73e-11	0.0177	DOC4_DM
2L_22584823_SNP	1.93e-06	0.0499	XLOC_011651	2RHet	861402	861402	862533	2.44e-08	0.0205	S2_DM
2L_22584823_SNP	2.58e-06	0.05	XLOC_011704	2RHet	1921599	1921599	1923490	2.44e-08	0.0205	S2_DM
2L_22584823_SNP	2.58e-06	0.05	XLOC_011704	2RHet	1921599	1921599	1923490	2.73e-11	0.0177	DOC4_DM
2L_22584823_SNP	1.97e-06	0.0487	XLOC_011789	2RHet	3215567	3215567	3217239	2.73e-11	0.0177	DOC4_DM
2L_22584823_SNP	1.97e-06	0.0487	XLOC_011789	2RHet	3215567	3215567	3217239	2.44e-08	0.0205	S2_DM
2L_22584823_SNP	5.65e-09	0.0489	XLOC_011853	2RHet	624599	623448	624599	2.44e-08	0.0205	S2_DM
2L_22584823_SNP	5.65e-09	0.0489	XLOC_011853	2RHet	624599	623448	624599	2.73e-11	0.0177	DOC4_DM
2L_22584903_INS	5.09e-11	0.0202	FBgn0040009	2L	22430400	22430400	22441183	1.85e-09	0.0205	S2_DM
2L_22584903_INS	5.09e-11	0.0202	FBgn0040009	2L	22430400	22430400	22441183	1.29e-08	0.0177	DOC4_DM
2L_22584903_INS	6.34e-07	0.0244	FBgn0262887	2L	22961737	22961737	22963456	1.85e-09	0.0205	S2_DM
2L_22584903_INS	6.34e-07	0.0244	FBgn0262887	2L	22961737	22961737	22963456	1.29e-08	0.0177	DOC4_DM
2L_22584903_INS	4.85e-07	0.0484	XLOC_006268	2R	21910	21910	24748	1.85e-09	0.0205	S2_DM
2L_22584903_INS	4.85e-07	0.0484	XLOC_006268	2R	21910	21910	24748	1.29e-08	0.0177	DOC4_DM
2L_22584903_INS	6.98e-07	0.0499	XLOC_011651	2RHet	861402	861402	862533	1.29e-08	0.0177	DOC4_DM
2L_22584903_INS	6.98e-07	0.0499	XLOC_011651	2RHet	861402	861402	862533	1.85e-09	0.0205	S2_DM
2L_22584903_INS	2.93e-07	0.05	XLOC_011704	2RHet	1921599	1921599	1923490	1.29e-08	0.0177	DOC4_DM
2L_22584903_INS	2.93e-07	0.05	XLOC_011704	2RHet	1921599	1921599	1923490	1.85e-09	0.0205	S2_DM
2L_22584903_INS	1.66e-06	0.0487	XLOC_011789	2RHet	3215567	3215567	3217239	1.29e-08	0.0177	DOC4_DM
2L_22584903_INS	1.66e-06	0.0487	XLOC_011789	2RHet	3215567	3215567	3217239	1.85e-09	0.0205	S2_DM
2L_22584903_INS	1.16e-08	0.0489	XLOC_011853	2RHet	624599	623448	624599	1.85e-09	0.0205	S2_DM
2L_22584903_INS	1.16e-08	0.0489	XLOC_011853	2RHet	624599	623448	624599	1.29e-08	0.0177	DOC4_DM
2L_22585633_SNP	3.66e-07	0.0484	XLOC_006268	2R	21910	21910	24748	9.66e-07	0.0177	DOC4_DM
2L_22585661_SNP	2.99e-07	0.0484	XLOC_006268	2R	21910	21910	24748	7.44e-07	0.0177	DOC4_DM
2L_22585826_SNP	1.22e-08	0.0202	FBgn0040009	2L	22430400	22430400	22441183	3.33e-08	0.0205	S2_DM
2L_22585826_SNP	1.22e-08	0.0202	FBgn0040009	2L	22430400	22430400	22441183	9.04e-09	0.0177	DOC4_DM
2L_22585826_SNP	1.69e-07	0.0244	FBgn0262887	2L	22961737	22961737	22963456	9.04e-09	0.0177	DOC4_DM
2L_22585826_SNP	1.69e-07	0.0244	FBgn0262887	2L	22961737	22961737	22963456	3.33e-08	0.0205	S2_DM
2L_22585826_SNP	1.25e-06	0.0484	XLOC_006268	2R	21910	21910	24748	3.33e-08	0.0205	S2_DM
2L_22585826_SNP	1.25e-06	0.0484	XLOC_006268	2R	21910	21910	24748	9.04e-09	0.0177	DOC4_DM
2L_22585826_SNP	3.24e-06	0.0499	XLOC_011651	2RHet	861402	861402	862533	9.04e-09	0.0177	DOC4_DM
2L_22585826_SNP	3.24e-06	0.0499	XLOC_011651	2RHet	861402	861402	862533	3.33e-08	0.0205	S2_DM
2L_22585826_SNP	1.27e-06	0.05	XLOC_011704	2RHet	1921599	1921599	1923490	9.04e-09	0.0177	DOC4_DM
2L_22585826_SNP	1.27e-06	0.05	XLOC_011704	2RHet	1921599	1921599	1923490	3.33e-08	0.0205	S2_DM
2L_22585941_SNP	7.33e-14	0.0202	FBgn0040009	2L	22430400	22430400	22441183	1.57e-08	0.0205	S2_DM
2L_22585941_SNP	7.05e-06	0.0244	FBgn0262887	2L	22961737	22961737	22963456	1.57e-08	0.0205	S2_DM
2L_22586187_SNP	1.77e-10	0.0484	XLOC_006268	2R	21910	21910	24748	3.2e-07	0.0177	DOC4_DM
2L_22586187_SNP	1.9e-07	0.0499	XLOC_011651	2RHet	861402	861402	862533	3.2e-07	0.0177	DOC4_DM
2L_22586498_SNP	2e-09	0.0484	XLOC_006268	2R	21910	21910	24748	2.11e-06	0.0205	S2_DM
2L_22586498_SNP	2e-09	0.0484	XLOC_006268	2R	21910	21910	24748	1.45e-09	0.0177	DOC4_DM
2L_22586498_SNP	1.46e-06	0.0499	XLOC_011651	2RHet	861402	861402	862533	2.11e-06	0.0205	S2_DM
2L_22586498_SNP	1.46e-06	0.0499	XLOC_011651	2RHet	861402	861402	862533	1.45e-09	0.0177	DOC4_DM
2L_22586612_DEL	6.61e-06	0.0484	XLOC_006268	2R	21910	21910	24748	1.03e-07	0.0177	DOC4_DM
2L_22586703_DEL	1.02e-13	0.0202	FBgn0040009	2L	22430400	22430400	22441183	6.15e-09	0.0205	S2_DM
2L_22586703_DEL	2.2e-06	0.0244	FBgn0262887	2L	22961737	22961737	22963456	6.15e-09	0.0205	S2_DM
2L_22586830_SNP	1.7e-14	0.0202	FBgn0040009	2L	22430400	22430400	22441183	6.06e-09	0.0205	S2_DM
2L_22586830_SNP	1.7e-14	0.0202	FBgn0040009	2L	22430400	22430400	22441183	1.62e-06	0.0177	DOC4_DM
2L_22586830_SNP	3.79e-06	0.0244	FBgn0262887	2L	22961737	22961737	22963456	1.62e-06	0.0177	DOC4_DM
2L_22586830_SNP	3.79e-06	0.0244	FBgn0262887	2L	22961737	22961737	22963456	6.06e-09	0.0205	S2_DM
2L_22586969_SNP	3.59e-06	0.0484	XLOC_006268	2R	21910	21910	24748	3.81e-06	0.0177	DOC4_DM
2L_22587028_SNP	3.21e-09	0.0484	XLOC_006268	2R	21910	21910	24748	3.32e-08	0.0177	DOC4_DM
2L_22587028_SNP	3.21e-09	0.0484	XLOC_006268	2R	21910	21910	24748	3.79e-06	0.0205	S2_DM
2L_22587067_SNP	1.47e-06	0.0202	FBgn0040009	2L	22430400	22430400	22441183	6.8e-08	0.0205	S2_DM
2L_22587067_SNP	4.3e-07	0.0498	XLOC_006359	2R	667741	667741	674254	6.8e-08	0.0205	S2_DM
2L_22587067_SNP	3.74e-10	0.05	XLOC_011704	2RHet	1921599	1921599	1923490	6.8e-08	0.0205	S2_DM
2L_22587067_SNP	1.29e-07	0.0494	XLOC_011705	2RHet	1924263	1924263	1926950	6.8e-08	0.0205	S2_DM
2L_22587309_SNP	1.55e-08	0.0484	XLOC_006268	2R	21910	21910	24748	1.45e-07	0.0177	DOC4_DM
2L_22587351_DEL	1.56e-14	0.0202	FBgn0040009	2L	22430400	22430400	22441183	1.24e-06	0.0177	DOC4_DM
2L_22587351_DEL	1.56e-14	0.0202	FBgn0040009	2L	22430400	22430400	22441183	5.21e-10	0.0205	S2_DM
2L_22587351_DEL	1.21e-06	0.0489	XLOC_011853	2RHet	624599	623448	624599	5.21e-10	0.0205	S2_DM
2L_22587351_DEL	1.21e-06	0.0489	XLOC_011853	2RHet	624599	623448	624599	1.24e-06	0.0177	DOC4_DM
2L_22587387_SNP	2.69e-09	0.0484	XLOC_006268	2R	21910	21910	24748	1.14e-08	0.0177	DOC4_DM
2L_22587387_SNP	2.69e-09	0.0484	XLOC_006268	2R	21910	21910	24748	7e-06	0.0205	S2_DM
2L_22587387_SNP	1.22e-06	0.0499	XLOC_011651	2RHet	861402	861402	862533	1.14e-08	0.0177	DOC4_DM
2L_22587387_SNP	1.22e-06	0.0499	XLOC_011651	2RHet	861402	861402	862533	7e-06	0.0205	S2_DM
2L_22587602_INS	3.48e-13	0.0202	FBgn0040009	2L	22430400	22430400	22441183	2.09e-08	0.0205	S2_DM
2L_22587602_INS	5.68e-06	0.0484	XLOC_006268	2R	21910	21910	24748	2.09e-08	0.0205	S2_DM
2L_22587602_INS	1.14e-06	0.0489	XLOC_011853	2RHet	624599	623448	624599	2.09e-08	0.0205	S2_DM
2L_22588106_INS	2.11e-06	0.0202	FBgn0040009	2L	22430400	22430400	22441183	6.13e-07	0.0205	S2_DM
2L_22588106_INS	3.3e-09	0.05	XLOC_011704	2RHet	1921599	1921599	1923490	6.13e-07	0.0205	S2_DM
2L_22588106_INS	5.7e-07	0.0494	XLOC_011705	2RHet	1924263	1924263	1926950	6.13e-07	0.0205	S2_DM
2L_22588108_SNP	6.09e-06	0.0202	FBgn0040009	2L	22430400	22430400	22441183	5.65e-06	0.0205	S2_DM
2L_22588108_SNP	4.78e-09	0.05	XLOC_011704	2RHet	1921599	1921599	1923490	5.65e-06	0.0205	S2_DM
2L_22588108_SNP	7.97e-07	0.0494	XLOC_011705	2RHet	1924263	1924263	1926950	5.65e-06	0.0205	S2_DM
2L_22588157_SNP	7.92e-08	0.0484	XLOC_006268	2R	21910	21910	24748	7.64e-07	0.0177	DOC4_DM
2L_22588279_SNP	1.67e-09	0.0202	FBgn0040009	2L	22430400	22430400	22441183	3.55e-07	0.0205	S2_DM
2L_22588317_SNP	7.7e-06	0.0202	FBgn0040009	2L	22430400	22430400	22441183	3.51e-06	0.0205	S2_DM
2L_22588317_SNP	6.97e-09	0.05	XLOC_011704	2RHet	1921599	1921599	1923490	3.51e-06	0.0205	S2_DM
2L_22588317_SNP	8.22e-07	0.0494	XLOC_011705	2RHet	1924263	1924263	1926950	3.51e-06	0.0205	S2_DM
2L_22588472_SNP	1.59e-11	0.0202	FBgn0040009	2L	22430400	22430400	22441183	5.1e-06	0.0177	DOC4_DM
2L_22588472_SNP	1.59e-11	0.0202	FBgn0040009	2L	22430400	22430400	22441183	7.72e-08	0.0205	S2_DM
2L_22589107_SNP	7.48e-09	0.0202	FBgn0040009	2L	22430400	22430400	22441183	2.16e-06	0.0177	DOC4_DM
2L_22589107_SNP	7.48e-09	0.0202	FBgn0040009	2L	22430400	22430400	22441183	4.72e-07	0.0205	S2_DM
2L_22589107_SNP	2.14e-08	0.0489	XLOC_011853	2RHet	624599	623448	624599	4.72e-07	0.0205	S2_DM
2L_22589107_SNP	2.14e-08	0.0489	XLOC_011853	2RHet	624599	623448	624599	2.16e-06	0.0177	DOC4_DM
2L_22589282_SNP	3.63e-09	0.0484	XLOC_006268	2R	21910	21910	24748	2.68e-08	0.0177	DOC4_DM
2L_22589282_SNP	3.63e-09	0.0484	XLOC_006268	2R	21910	21910	24748	1.39e-06	0.0205	S2_DM
2L_22589282_SNP	1.18e-06	0.0499	XLOC_011651	2RHet	861402	861402	862533	1.39e-06	0.0205	S2_DM
2L_22589282_SNP	1.18e-06	0.0499	XLOC_011651	2RHet	861402	861402	862533	2.68e-08	0.0177	DOC4_DM
2L_22589383_DEL	1.69e-13	0.0202	FBgn0040009	2L	22430400	22430400	22441183	5.48e-07	0.0177	DOC4_DM
2L_22589383_DEL	1.69e-13	0.0202	FBgn0040009	2L	22430400	22430400	22441183	3.32e-10	0.0205	S2_DM
2L_22589383_DEL	3.14e-07	0.0244	FBgn0262887	2L	22961737	22961737	22963456	3.32e-10	0.0205	S2_DM
2L_22589383_DEL	3.14e-07	0.0244	FBgn0262887	2L	22961737	22961737	22963456	5.48e-07	0.0177	DOC4_DM
2L_22589383_DEL	1e-06	0.0484	XLOC_006268	2R	21910	21910	24748	5.48e-07	0.0177	DOC4_DM
2L_22589383_DEL	1e-06	0.0484	XLOC_006268	2R	21910	21910	24748	3.32e-10	0.0205	S2_DM
2L_22589383_DEL	2.7e-06	0.05	XLOC_011704	2RHet	1921599	1921599	1923490	3.32e-10	0.0205	S2_DM
2L_22589383_DEL	2.7e-06	0.05	XLOC_011704	2RHet	1921599	1921599	1923490	5.48e-07	0.0177	DOC4_DM
2L_22589383_DEL	3.1e-06	0.0487	XLOC_011789	2RHet	3215567	3215567	3217239	5.48e-07	0.0177	DOC4_DM
2L_22589383_DEL	3.1e-06	0.0487	XLOC_011789	2RHet	3215567	3215567	3217239	3.32e-10	0.0205	S2_DM
2L_22589383_DEL	3.66e-08	0.0489	XLOC_011853	2RHet	624599	623448	624599	5.48e-07	0.0177	DOC4_DM
2L_22589383_DEL	3.66e-08	0.0489	XLOC_011853	2RHet	624599	623448	624599	3.32e-10	0.0205	S2_DM
2L_22589391_INS	9.82e-13	0.0202	FBgn0040009	2L	22430400	22430400	22441183	1.66e-07	0.0177	DOC4_DM
2L_22589391_INS	9.82e-13	0.0202	FBgn0040009	2L	22430400	22430400	22441183	1.32e-09	0.0205	S2_DM
2L_22589391_INS	2.84e-07	0.0244	FBgn0262887	2L	22961737	22961737	22963456	1.32e-09	0.0205	S2_DM
2L_22589391_INS	2.84e-07	0.0244	FBgn0262887	2L	22961737	22961737	22963456	1.66e-07	0.0177	DOC4_DM
2L_22589391_INS	4.09e-07	0.0484	XLOC_006268	2R	21910	21910	24748	1.32e-09	0.0205	S2_DM
2L_22589391_INS	4.09e-07	0.0484	XLOC_006268	2R	21910	21910	24748	1.66e-07	0.0177	DOC4_DM
2L_22589391_INS	3.45e-06	0.0499	XLOC_011651	2RHet	861402	861402	862533	1.32e-09	0.0205	S2_DM
2L_22589391_INS	3.45e-06	0.0499	XLOC_011651	2RHet	861402	861402	862533	1.66e-07	0.0177	DOC4_DM
2L_22589391_INS	3.89e-08	0.0489	XLOC_011853	2RHet	624599	623448	624599	1.32e-09	0.0205	S2_DM
2L_22589391_INS	3.89e-08	0.0489	XLOC_011853	2RHet	624599	623448	624599	1.66e-07	0.0177	DOC4_DM
2L_22589773_SNP	1.45e-06	0.0202	FBgn0040009	2L	22430400	22430400	22441183	5.7e-08	0.0205	S2_DM
2L_22589773_SNP	6.03e-13	0.05	XLOC_011704	2RHet	1921599	1921599	1923490	5.7e-08	0.0205	S2_DM
2L_22589773_SNP	2.78e-10	0.0494	XLOC_011705	2RHet	1924263	1924263	1926950	5.7e-08	0.0205	S2_DM
2L_22589773_SNP	3.52e-07	0.0488	XLOC_011977	2RHet	1591609	1590552	1591609	5.7e-08	0.0205	S2_DM
2L_22589802_INS	3.62e-09	0.0484	XLOC_006268	2R	21910	21910	24748	3.49e-08	0.0177	DOC4_DM
2L_22589802_INS	3.62e-09	0.0484	XLOC_006268	2R	21910	21910	24748	3.74e-06	0.0205	S2_DM
2L_22589802_INS	6.82e-07	0.0499	XLOC_011651	2RHet	861402	861402	862533	3.49e-08	0.0177	DOC4_DM
2L_22589802_INS	6.82e-07	0.0499	XLOC_011651	2RHet	861402	861402	862533	3.74e-06	0.0205	S2_DM
2L_22590003_SNP	1.39e-10	0.0202	FBgn0040009	2L	22430400	22430400	22441183	2.28e-08	0.0205	S2_DM
2L_22590003_SNP	8.04e-06	0.0244	FBgn0262887	2L	22961737	22961737	22963456	2.28e-08	0.0205	S2_DM
2L_22590281_SNP	2.4e-08	0.0484	XLOC_006268	2R	21910	21910	24748	1.41e-07	0.0177	DOC4_DM
2L_22590281_SNP	2.4e-08	0.0484	XLOC_006268	2R	21910	21910	24748	3.1e-07	0.0205	S2_DM
2L_22590281_SNP	2.15e-06	0.0499	XLOC_011651	2RHet	861402	861402	862533	3.1e-07	0.0205	S2_DM
2L_22590281_SNP	2.15e-06	0.0499	XLOC_011651	2RHet	861402	861402	862533	1.41e-07	0.0177	DOC4_DM
2L_22590510_SNP	1.47e-10	0.0202	FBgn0040009	2L	22430400	22430400	22441183	5.82e-08	0.0205	S2_DM
2L_22590510_SNP	9.88e-06	0.0244	FBgn0262887	2L	22961737	22961737	22963456	5.82e-08	0.0205	S2_DM
2L_22590612_SNP	7.61e-09	0.05	XLOC_011704	2RHet	1921599	1921599	1923490	8.45e-08	0.0205	S2_DM
2L_22590612_SNP	1.22e-06	0.0494	XLOC_011705	2RHet	1924263	1924263	1926950	8.45e-08	0.0205	S2_DM
2L_22590858_SNP	2.45e-09	0.0202	FBgn0040009	2L	22430400	22430400	22441183	3.93e-08	0.0205	S2_DM
2L_22590858_SNP	1.05e-06	0.0244	FBgn0262887	2L	22961737	22961737	22963456	3.93e-08	0.0205	S2_DM
2L_22591063_SNP	2.06e-07	0.0484	XLOC_006268	2R	21910	21910	24748	2.84e-06	0.0205	S2_DM
2L_22591063_SNP	2.06e-07	0.0484	XLOC_006268	2R	21910	21910	24748	1.52e-06	0.0177	DOC4_DM
2L_22591693_SNP	8.79e-06	0.0202	FBgn0040009	2L	22430400	22430400	22441183	1.76e-07	0.0205	S2_DM
2L_22591693_SNP	3.24e-11	0.05	XLOC_011704	2RHet	1921599	1921599	1923490	1.76e-07	0.0205	S2_DM
2L_22591693_SNP	3.69e-09	0.0494	XLOC_011705	2RHet	1924263	1924263	1926950	1.76e-07	0.0205	S2_DM
2L_22591693_SNP	3.51e-06	0.0488	XLOC_011977	2RHet	1591609	1590552	1591609	1.76e-07	0.0205	S2_DM
2L_22591719_DEL	1.47e-09	0.05	XLOC_011704	2RHet	1921599	1921599	1923490	4.84e-08	0.0205	S2_DM
2L_22591719_DEL	6.61e-07	0.0494	XLOC_011705	2RHet	1924263	1924263	1926950	4.84e-08	0.0205	S2_DM
2L_22591833_SNP	2.17e-09	0.0484	XLOC_006268	2R	21910	21910	24748	4.79e-09	0.0177	DOC4_DM
2L_22591833_SNP	2.17e-09	0.0484	XLOC_006268	2R	21910	21910	24748	4.27e-06	0.0205	S2_DM
2L_22591833_SNP	7.38e-07	0.0499	XLOC_011651	2RHet	861402	861402	862533	4.27e-06	0.0205	S2_DM
2L_22591833_SNP	7.38e-07	0.0499	XLOC_011651	2RHet	861402	861402	862533	4.79e-09	0.0177	DOC4_DM
2L_22591917_SNP	3.78e-08	0.0484	XLOC_006268	2R	21910	21910	24748	1.72e-08	0.0177	DOC4_DM
2L_22591917_SNP	3.78e-08	0.0484	XLOC_006268	2R	21910	21910	24748	9.23e-06	0.0205	S2_DM
2L_22591917_SNP	1.73e-06	0.0499	XLOC_011651	2RHet	861402	861402	862533	1.72e-08	0.0177	DOC4_DM
2L_22591917_SNP	1.73e-06	0.0499	XLOC_011651	2RHet	861402	861402	862533	9.23e-06	0.0205	S2_DM
2L_22592340_SNP	3.18e-09	0.0484	XLOC_006268	2R	21910	21910	24748	2.12e-08	0.0177	DOC4_DM
2L_22592340_SNP	3.18e-09	0.0484	XLOC_006268	2R	21910	21910	24748	4.42e-06	0.0205	S2_DM
2L_22592340_SNP	6.07e-07	0.0499	XLOC_011651	2RHet	861402	861402	862533	4.42e-06	0.0205	S2_DM
2L_22592340_SNP	6.07e-07	0.0499	XLOC_011651	2RHet	861402	861402	862533	2.12e-08	0.0177	DOC4_DM
2L_22594041_SNP	1.14e-07	0.0202	FBgn0040009	2L	22430400	22430400	22441183	1.76e-09	0.0205	S2_DM
2L_22594041_SNP	4.93e-06	0.0244	FBgn0262887	2L	22961737	22961737	22963456	1.76e-09	0.0205	S2_DM
2L_22594041_SNP	4.31e-07	0.05	XLOC_011704	2RHet	1921599	1921599	1923490	1.76e-09	0.0205	S2_DM
2L_22594041_SNP	1.92e-07	0.0489	XLOC_011853	2RHet	624599	623448	624599	1.76e-09	0.0205	S2_DM
2L_22595019_INS	6.25e-10	0.0484	XLOC_006268	2R	21910	21910	24748	9.19e-10	0.0177	DOC4_DM
2L_22595019_INS	6.25e-10	0.0484	XLOC_006268	2R	21910	21910	24748	1.31e-06	0.0205	S2_DM
2L_22595019_INS	3.82e-08	0.0499	XLOC_011651	2RHet	861402	861402	862533	9.19e-10	0.0177	DOC4_DM
2L_22595019_INS	3.82e-08	0.0499	XLOC_011651	2RHet	861402	861402	862533	1.31e-06	0.0205	S2_DM
2L_22596416_SNP	5.12e-10	0.0202	FBgn0040009	2L	22430400	22430400	22441183	2.22e-08	0.0205	S2_DM
2L_22596735_DEL	3.16e-07	0.0202	FBgn0040009	2L	22430400	22430400	22441183	4.48e-08	0.0205	S2_DM
2L_22596735_DEL	1.12e-07	0.05	XLOC_011704	2RHet	1921599	1921599	1923490	4.48e-08	0.0205	S2_DM
2L_22596793_SNP	2e-08	0.0202	FBgn0040009	2L	22430400	22430400	22441183	3.61e-08	0.0205	S2_DM
2L_22596793_SNP	7.98e-09	0.05	XLOC_011704	2RHet	1921599	1921599	1923490	3.61e-08	0.0205	S2_DM
2L_22596804_SNP	9.73e-09	0.0202	FBgn0040009	2L	22430400	22430400	22441183	1.52e-08	0.0205	S2_DM
2L_22596804_SNP	6.88e-06	0.0244	FBgn0262887	2L	22961737	22961737	22963456	1.52e-08	0.0205	S2_DM
2L_22596804_SNP	1.79e-08	0.05	XLOC_011704	2RHet	1921599	1921599	1923490	1.52e-08	0.0205	S2_DM
2L_22597254_SNP	1.69e-06	0.0202	FBgn0040009	2L	22430400	22430400	22441183	5.27e-09	0.0205	S2_DM
2L_22597254_SNP	1.69e-06	0.0202	FBgn0040009	2L	22430400	22430400	22441183	3.17e-06	0.0177	DOC4_DM
2L_22597254_SNP	4.95e-07	0.0244	FBgn0262887	2L	22961737	22961737	22963456	5.27e-09	0.0205	S2_DM
2L_22597254_SNP	4.95e-07	0.0244	FBgn0262887	2L	22961737	22961737	22963456	3.17e-06	0.0177	DOC4_DM
2L_22597254_SNP	6.42e-08	0.05	XLOC_011704	2RHet	1921599	1921599	1923490	5.27e-09	0.0205	S2_DM
2L_22597254_SNP	6.42e-08	0.05	XLOC_011704	2RHet	1921599	1921599	1923490	3.17e-06	0.0177	DOC4_DM
2L_22597254_SNP	4.7e-07	0.0494	XLOC_011705	2RHet	1924263	1924263	1926950	5.27e-09	0.0205	S2_DM
2L_22597254_SNP	4.7e-07	0.0494	XLOC_011705	2RHet	1924263	1924263	1926950	3.17e-06	0.0177	DOC4_DM
2L_22597254_SNP	6.36e-07	0.0489	XLOC_011853	2RHet	624599	623448	624599	5.27e-09	0.0205	S2_DM
2L_22597254_SNP	6.36e-07	0.0489	XLOC_011853	2RHet	624599	623448	624599	3.17e-06	0.0177	DOC4_DM
2L_22597254_SNP	1.45e-06	0.0488	XLOC_011977	2RHet	1591609	1590552	1591609	3.17e-06	0.0177	DOC4_DM
2L_22597254_SNP	1.45e-06	0.0488	XLOC_011977	2RHet	1591609	1590552	1591609	5.27e-09	0.0205	S2_DM
2L_22597254_SNP	4.33e-07	0.0488	XLOC_012081	2RHet	3151739	3149849	3151739	3.17e-06	0.0177	DOC4_DM
2L_22597254_SNP	4.33e-07	0.0488	XLOC_012081	2RHet	3151739	3149849	3151739	5.27e-09	0.0205	S2_DM
2L_22597975_SNP	2.75e-08	0.0202	FBgn0040009	2L	22430400	22430400	22441183	3.2e-07	0.0205	S2_DM
2L_22597975_SNP	9.71e-07	0.0489	XLOC_006069	2L	22631282	22629381	22631282	3.2e-07	0.0205	S2_DM
2L_22598024_SNP	1.63e-11	0.0202	FBgn0040009	2L	22430400	22430400	22441183	3.44e-08	0.0205	S2_DM
2L_22598026_SNP	1.3e-10	0.0202	FBgn0040009	2L	22430400	22430400	22441183	1.16e-07	0.0205	S2_DM
2L_22598033_DEL	2.62e-09	0.0202	FBgn0040009	2L	22430400	22430400	22441183	2.79e-07	0.0205	S2_DM
2L_22598039_SNP	6.82e-11	0.0202	FBgn0040009	2L	22430400	22430400	22441183	7.52e-08	0.0205	S2_DM
2L_22598054_SNP	1.13e-07	0.0484	XLOC_006268	2R	21910	21910	24748	2.51e-06	0.0177	DOC4_DM
2L_22598063_DEL	8.14e-11	0.0202	FBgn0040009	2L	22430400	22430400	22441183	1.32e-06	0.0205	S2_DM
2L_22598072_INS	1.45e-10	0.0202	FBgn0040009	2L	22430400	22430400	22441183	1.4e-06	0.0205	S2_DM
2L_22598077_DEL	2.99e-09	0.0202	FBgn0040009	2L	22430400	22430400	22441183	8.53e-06	0.0205	S2_DM
2L_22598667_SNP	1.78e-07	0.0488	XLOC_012081	2RHet	3151739	3149849	3151739	8.41e-07	0.0177	DOC4_DM
2L_22599413_SNP	5.92e-09	0.0484	XLOC_006268	2R	21910	21910	24748	6.42e-06	0.0205	S2_DM
2L_22599413_SNP	5.92e-09	0.0484	XLOC_006268	2R	21910	21910	24748	5.74e-07	0.0177	DOC4_DM
2L_22599595_SNP	5.64e-10	0.0202	FBgn0040009	2L	22430400	22430400	22441183	5.84e-08	0.0177	DOC4_DM
2L_22599595_SNP	5.64e-10	0.0202	FBgn0040009	2L	22430400	22430400	22441183	8.6e-09	0.0205	S2_DM
2L_22599674_SNP	2.67e-07	0.0484	XLOC_006268	2R	21910	21910	24748	3.18e-06	0.0205	S2_DM
2L_22599674_SNP	2.67e-07	0.0484	XLOC_006268	2R	21910	21910	24748	3.89e-06	0.0177	DOC4_DM
2L_22599674_SNP	1.45e-06	0.05	XLOC_011704	2RHet	1921599	1921599	1923490	3.89e-06	0.0177	DOC4_DM
2L_22599674_SNP	1.45e-06	0.05	XLOC_011704	2RHet	1921599	1921599	1923490	3.18e-06	0.0205	S2_DM
2L_22599970_SNP	2.68e-08	0.0484	XLOC_006268	2R	21910	21910	24748	7.76e-07	0.0177	DOC4_DM
2L_22600311_DEL	1.12e-07	0.0484	XLOC_006268	2R	21910	21910	24748	1.51e-07	0.0177	DOC4_DM
2L_22600311_DEL	1.12e-07	0.0484	XLOC_006268	2R	21910	21910	24748	1.44e-06	0.0205	S2_DM
2L_22600311_DEL	3.05e-06	0.0499	XLOC_011651	2RHet	861402	861402	862533	1.44e-06	0.0205	S2_DM
2L_22600311_DEL	3.05e-06	0.0499	XLOC_011651	2RHet	861402	861402	862533	1.51e-07	0.0177	DOC4_DM
2L_22600372_SNP	1.78e-07	0.0484	XLOC_006268	2R	21910	21910	24748	2.42e-06	0.0177	DOC4_DM
2L_22600372_SNP	2.71e-07	0.0489	XLOC_011853	2RHet	624599	623448	624599	2.42e-06	0.0177	DOC4_DM
2L_22600421_INS	1.39e-09	0.0484	XLOC_006268	2R	21910	21910	24748	2e-09	0.0177	DOC4_DM
2L_22600421_INS	1.39e-09	0.0484	XLOC_006268	2R	21910	21910	24748	9.38e-07	0.0205	S2_DM
2L_22600421_INS	4.6e-08	0.0499	XLOC_011651	2RHet	861402	861402	862533	9.38e-07	0.0205	S2_DM
2L_22600421_INS	4.6e-08	0.0499	XLOC_011651	2RHet	861402	861402	862533	2e-09	0.0177	DOC4_DM
2L_22600696_SNP	2.15e-08	0.0484	XLOC_006268	2R	21910	21910	24748	1.63e-08	0.0177	DOC4_DM
2L_22601100_SNP	2.25e-10	0.0202	FBgn0040009	2L	22430400	22430400	22441183	1.55e-08	0.0205	S2_DM
2L_22601100_SNP	1.48e-06	0.0244	FBgn0262887	2L	22961737	22961737	22963456	1.55e-08	0.0205	S2_DM
2L_22601242_SNP	8.63e-10	0.0202	FBgn0040009	2L	22430400	22430400	22441183	3.34e-08	0.0205	S2_DM
2L_22601242_SNP	8.06e-06	0.0244	FBgn0262887	2L	22961737	22961737	22963456	3.34e-08	0.0205	S2_DM
2L_22601304_DEL	1.54e-07	0.0484	XLOC_006268	2R	21910	21910	24748	4.61e-08	0.0177	DOC4_DM
2L_22601641_SNP	1.06e-08	0.0484	XLOC_006268	2R	21910	21910	24748	2.52e-08	0.0177	DOC4_DM
2L_22601641_SNP	1.06e-08	0.0484	XLOC_006268	2R	21910	21910	24748	5.87e-07	0.0205	S2_DM
2L_22601641_SNP	3.31e-07	0.0489	XLOC_011853	2RHet	624599	623448	624599	5.87e-07	0.0205	S2_DM
2L_22601641_SNP	3.31e-07	0.0489	XLOC_011853	2RHet	624599	623448	624599	2.52e-08	0.0177	DOC4_DM
2L_22601710_SNP	1.45e-06	0.0202	FBgn0040009	2L	22430400	22430400	22441183	6.95e-08	0.0205	S2_DM
2L_22601710_SNP	6.02e-11	0.05	XLOC_011704	2RHet	1921599	1921599	1923490	6.95e-08	0.0205	S2_DM
2L_22601710_SNP	1.73e-08	0.0494	XLOC_011705	2RHet	1924263	1924263	1926950	6.95e-08	0.0205	S2_DM
2L_22601710_SNP	1.3e-06	0.0488	XLOC_011977	2RHet	1591609	1590552	1591609	6.95e-08	0.0205	S2_DM
2L_22601872_SNP	9.4e-09	0.0484	XLOC_006268	2R	21910	21910	24748	8.68e-08	0.0177	DOC4_DM
2L_22601903_SNP	1.03e-09	0.0202	FBgn0040009	2L	22430400	22430400	22441183	1.37e-10	0.0205	S2_DM
2L_22601903_SNP	1.03e-09	0.0202	FBgn0040009	2L	22430400	22430400	22441183	1.83e-09	0.0177	DOC4_DM
2L_22601903_SNP	2.31e-06	0.0244	FBgn0262887	2L	22961737	22961737	22963456	1.37e-10	0.0205	S2_DM
2L_22601903_SNP	2.31e-06	0.0244	FBgn0262887	2L	22961737	22961737	22963456	1.83e-09	0.0177	DOC4_DM
2L_22601903_SNP	1.1e-06	0.0489	XLOC_011853	2RHet	624599	623448	624599	1.83e-09	0.0177	DOC4_DM
2L_22601903_SNP	1.1e-06	0.0489	XLOC_011853	2RHet	624599	623448	624599	1.37e-10	0.0205	S2_DM
2L_22602029_SNP	5.87e-08	0.0484	XLOC_006268	2R	21910	21910	24748	1.35e-06	0.0177	DOC4_DM
2L_22602122_SNP	2.19e-09	0.0484	XLOC_006268	2R	21910	21910	24748	2.05e-08	0.0177	DOC4_DM
2L_22602122_SNP	2.19e-09	0.0484	XLOC_006268	2R	21910	21910	24748	1.69e-06	0.0205	S2_DM
2L_22602122_SNP	7.17e-07	0.0499	XLOC_011651	2RHet	861402	861402	862533	1.69e-06	0.0205	S2_DM
2L_22602122_SNP	7.17e-07	0.0499	XLOC_011651	2RHet	861402	861402	862533	2.05e-08	0.0177	DOC4_DM
2L_22602252_SNP	3.7e-09	0.0484	XLOC_006268	2R	21910	21910	24748	7.75e-08	0.0177	DOC4_DM
2L_22602253_SNP	8.66e-09	0.0484	XLOC_006268	2R	21910	21910	24748	5.03e-09	0.0177	DOC4_DM
2L_22602483_SNP	5.09e-07	0.0484	XLOC_006268	2R	21910	21910	24748	5.07e-07	0.0177	DOC4_DM
2L_22602487_SNP	1.58e-06	0.0484	XLOC_006268	2R	21910	21910	24748	4.52e-06	0.0177	DOC4_DM
2L_22606003_DEL	1.68e-10	0.05	XLOC_011704	2RHet	1921599	1921599	1923490	1.13e-06	0.0205	S2_DM
2L_22606003_DEL	1.75e-08	0.0494	XLOC_011705	2RHet	1924263	1924263	1926950	1.13e-06	0.0205	S2_DM
2L_22606248_SNP	4.88e-08	0.0484	XLOC_006268	2R	21910	21910	24748	1.03e-06	0.0177	DOC4_DM
2L_22606248_SNP	5.51e-09	0.0499	XLOC_011651	2RHet	861402	861402	862533	1.03e-06	0.0177	DOC4_DM
2L_22607373_SNP	8.07e-10	0.0202	FBgn0040009	2L	22430400	22430400	22441183	3.11e-07	0.0205	S2_DM
2L_22607373_SNP	1.12e-06	0.0489	XLOC_006069	2L	22631282	22629381	22631282	3.11e-07	0.0205	S2_DM
2L_22607640_SNP	1.04e-07	0.0244	FBgn0262887	2L	22961737	22961737	22963456	2.12e-06	0.0205	S2_DM
2L_22607640_SNP	1.04e-07	0.0244	FBgn0262887	2L	22961737	22961737	22963456	2.59e-08	0.0177	DOC4_DM
2L_22607640_SNP	3.81e-07	0.0484	XLOC_006268	2R	21910	21910	24748	2.59e-08	0.0177	DOC4_DM
2L_22607640_SNP	3.81e-07	0.0484	XLOC_006268	2R	21910	21910	24748	2.12e-06	0.0205	S2_DM
2L_22607640_SNP	1.91e-06	0.0499	XLOC_011651	2RHet	861402	861402	862533	2.59e-08	0.0177	DOC4_DM
2L_22607640_SNP	1.91e-06	0.0499	XLOC_011651	2RHet	861402	861402	862533	2.12e-06	0.0205	S2_DM
2L_22608169_INS	5e-10	0.0202	FBgn0040009	2L	22430400	22430400	22441183	3.43e-09	0.0205	S2_DM
2L_22608169_INS	6.65e-07	0.05	XLOC_011704	2RHet	1921599	1921599	1923490	3.43e-09	0.0205	S2_DM
2L_22608178_SNP	7.31e-11	0.0484	XLOC_006268	2R	21910	21910	24748	2.27e-06	0.0177	DOC4_DM
2L_22608178_SNP	1.11e-08	0.0499	XLOC_011651	2RHet	861402	861402	862533	2.27e-06	0.0177	DOC4_DM
2L_22608752_SNP	1.05e-10	0.0202	FBgn0040009	2L	22430400	22430400	22441183	6.22e-07	0.0177	DOC4_DM
2L_22608752_SNP	1.05e-10	0.0202	FBgn0040009	2L	22430400	22430400	22441183	1.16e-10	0.0205	S2_DM
2L_22608752_SNP	7.97e-07	0.0489	XLOC_011853	2RHet	624599	623448	624599	1.16e-10	0.0205	S2_DM
2L_22608752_SNP	7.97e-07	0.0489	XLOC_011853	2RHet	624599	623448	624599	6.22e-07	0.0177	DOC4_DM
2L_22609050_INS	4.18e-09	0.0484	XLOC_006268	2R	21910	21910	24748	4.99e-06	0.0205	S2_DM
2L_22609050_INS	4.18e-09	0.0484	XLOC_006268	2R	21910	21910	24748	1.9e-07	0.0177	DOC4_DM
2L_22609050_INS	9.01e-07	0.0499	XLOC_011651	2RHet	861402	861402	862533	1.9e-07	0.0177	DOC4_DM
2L_22609050_INS	9.01e-07	0.0499	XLOC_011651	2RHet	861402	861402	862533	4.99e-06	0.0205	S2_DM
2L_22609063_SNP	3.04e-10	0.0202	FBgn0040009	2L	22430400	22430400	22441183	2.57e-11	0.0205	S2_DM
2L_22609063_SNP	3.04e-10	0.0202	FBgn0040009	2L	22430400	22430400	22441183	2.53e-06	0.0177	DOC4_DM
2L_22609063_SNP	4.27e-07	0.0244	FBgn0262887	2L	22961737	22961737	22963456	2.57e-11	0.0205	S2_DM
2L_22609063_SNP	4.27e-07	0.0244	FBgn0262887	2L	22961737	22961737	22963456	2.53e-06	0.0177	DOC4_DM
2L_22609063_SNP	3.07e-07	0.0498	XLOC_003055	2L	22739320	22739320	22739796	2.53e-06	0.0177	DOC4_DM
2L_22609063_SNP	3.07e-07	0.0498	XLOC_003055	2L	22739320	22739320	22739796	2.57e-11	0.0205	S2_DM
2L_22609063_SNP	3.43e-07	0.0489	XLOC_011853	2RHet	624599	623448	624599	2.57e-11	0.0205	S2_DM
2L_22609063_SNP	3.43e-07	0.0489	XLOC_011853	2RHet	624599	623448	624599	2.53e-06	0.0177	DOC4_DM
2L_22609204_INS	4.75e-13	0.0202	FBgn0040009	2L	22430400	22430400	22441183	5.9e-06	0.0177	DOC4_DM
2L_22609204_INS	4.75e-13	0.0202	FBgn0040009	2L	22430400	22430400	22441183	1.14e-12	0.0205	S2_DM
2L_22609204_INS	1.83e-07	0.0244	FBgn0262887	2L	22961737	22961737	22963456	5.9e-06	0.0177	DOC4_DM
2L_22609204_INS	1.83e-07	0.0244	FBgn0262887	2L	22961737	22961737	22963456	1.14e-12	0.0205	S2_DM
2L_22609204_INS	1.18e-07	0.0498	XLOC_003055	2L	22739320	22739320	22739796	1.14e-12	0.0205	S2_DM
2L_22609204_INS	1.18e-07	0.0498	XLOC_003055	2L	22739320	22739320	22739796	5.9e-06	0.0177	DOC4_DM
2L_22609511_SNP	1.88e-10	0.0484	XLOC_006268	2R	21910	21910	24748	1.34e-09	0.0177	DOC4_DM
2L_22609511_SNP	1.88e-10	0.0484	XLOC_006268	2R	21910	21910	24748	3.71e-06	0.0205	S2_DM
2L_22609511_SNP	2.27e-09	0.0499	XLOC_011651	2RHet	861402	861402	862533	1.34e-09	0.0177	DOC4_DM
2L_22609511_SNP	2.27e-09	0.0499	XLOC_011651	2RHet	861402	861402	862533	3.71e-06	0.0205	S2_DM
2L_22609817_SNP	3.06e-06	0.0202	FBgn0040009	2L	22430400	22430400	22441183	3.35e-09	0.0205	S2_DM
2L_22609817_SNP	2.56e-06	0.0244	FBgn0262887	2L	22961737	22961737	22963456	3.35e-09	0.0205	S2_DM
2L_22609817_SNP	4.77e-06	0.05	XLOC_011704	2RHet	1921599	1921599	1923490	3.35e-09	0.0205	S2_DM
2L_22610230_SNP	1.03e-09	0.0484	XLOC_006268	2R	21910	21910	24748	6.16e-10	0.0177	DOC4_DM
2L_22610230_SNP	1.56e-08	0.0499	XLOC_011651	2RHet	861402	861402	862533	6.16e-10	0.0177	DOC4_DM
2L_22610230_SNP	8.38e-07	0.0489	XLOC_011853	2RHet	624599	623448	624599	6.16e-10	0.0177	DOC4_DM
2L_22610775_SNP	1.39e-09	0.0484	XLOC_006268	2R	21910	21910	24748	5.82e-09	0.0177	DOC4_DM
2L_22610775_SNP	3.46e-06	0.0499	XLOC_011651	2RHet	861402	861402	862533	5.82e-09	0.0177	DOC4_DM
2L_22611251_SNP	7.19e-07	0.0482	FBgn0085732	2RHet	337700	337700	340299	2.05e-07	0.0177	DOC4_DM
2L_22611251_SNP	2.7e-06	0.0484	XLOC_006268	2R	21910	21910	24748	2.05e-07	0.0177	DOC4_DM
2L_22611251_SNP	8.97e-09	0.0499	XLOC_011651	2RHet	861402	861402	862533	2.05e-07	0.0177	DOC4_DM
2L_22611885_SNP	4.95e-06	0.0202	FBgn0040009	2L	22430400	22430400	22441183	3.39e-06	0.0205	S2_DM
2L_22614717_SNP	8.13e-07	0.0484	XLOC_006268	2R	21910	21910	24748	9.21e-06	0.0177	DOC4_DM
2L_22615901_SNP	3.78e-06	0.0202	FBgn0040009	2L	22430400	22430400	22441183	4.24e-10	0.0205	S2_DM
2L_22615901_SNP	4.44e-07	0.0244	FBgn0262887	2L	22961737	22961737	22963456	4.24e-10	0.0205	S2_DM
2L_22617586_SNP	8.33e-06	0.0244	FBgn0262887	2L	22961737	22961737	22963456	2.49e-07	0.0205	S2_DM
2L_22617586_SNP	6.76e-08	0.05	XLOC_011704	2RHet	1921599	1921599	1923490	2.49e-07	0.0205	S2_DM
2L_22617658_SNP	9.13e-06	0.0244	FBgn0262887	2L	22961737	22961737	22963456	1.8e-07	0.0205	S2_DM
2L_22617658_SNP	2.71e-07	0.05	XLOC_011704	2RHet	1921599	1921599	1923490	1.8e-07	0.0205	S2_DM
2L_22617975_SNP	6.28e-06	0.0202	FBgn0040009	2L	22430400	22430400	22441183	3.14e-08	0.0205	S2_DM
2L_22617975_SNP	3.08e-08	0.0244	FBgn0262887	2L	22961737	22961737	22963456	3.14e-08	0.0205	S2_DM
2L_22618474_SNP	4.14e-08	0.0202	FBgn0040009	2L	22430400	22430400	22441183	2.09e-08	0.0205	S2_DM
2L_22618474_SNP	7.91e-08	0.0244	FBgn0262887	2L	22961737	22961737	22963456	2.09e-08	0.0205	S2_DM
2L_22618474_SNP	1.39e-08	0.05	XLOC_011704	2RHet	1921599	1921599	1923490	2.09e-08	0.0205	S2_DM
2L_22618924_SNP	4.3e-07	0.0244	FBgn0262887	2L	22961737	22961737	22963456	6.75e-07	0.0205	S2_DM
2L_22620121_SNP	2.09e-08	0.0484	XLOC_006268	2R	21910	21910	24748	7.08e-07	0.0177	DOC4_DM
2L_22620121_SNP	2.09e-08	0.0484	XLOC_006268	2R	21910	21910	24748	4.67e-06	0.0205	S2_DM
2L_22620197_SNP	8.29e-06	0.0244	FBgn0262887	2L	22961737	22961737	22963456	2.47e-06	0.0205	S2_DM
2L_22620197_SNP	8.29e-06	0.0244	FBgn0262887	2L	22961737	22961737	22963456	1.82e-06	0.0177	DOC4_DM
2L_22620197_SNP	2.34e-08	0.0484	XLOC_006268	2R	21910	21910	24748	1.82e-06	0.0177	DOC4_DM
2L_22620197_SNP	2.34e-08	0.0484	XLOC_006268	2R	21910	21910	24748	2.47e-06	0.0205	S2_DM
2L_22620197_SNP	2.55e-06	0.0499	XLOC_011651	2RHet	861402	861402	862533	2.47e-06	0.0205	S2_DM
2L_22620197_SNP	2.55e-06	0.0499	XLOC_011651	2RHet	861402	861402	862533	1.82e-06	0.0177	DOC4_DM
2L_22620507_SNP	1.99e-08	0.0202	FBgn0040009	2L	22430400	22430400	22441183	2.16e-10	0.0205	S2_DM
2L_22620507_SNP	2.12e-07	0.0244	FBgn0262887	2L	22961737	22961737	22963456	2.16e-10	0.0205	S2_DM
2L_22620589_SNP	7.13e-06	0.0202	FBgn0040009	2L	22430400	22430400	22441183	5.44e-07	0.0205	S2_DM
2L_22620589_SNP	9.93e-09	0.0244	FBgn0262887	2L	22961737	22961737	22963456	5.44e-07	0.0205	S2_DM
2L_22620605_SNP	3.63e-06	0.0202	FBgn0040009	2L	22430400	22430400	22441183	3.59e-07	0.0205	S2_DM
2L_22620605_SNP	4.61e-08	0.0244	FBgn0262887	2L	22961737	22961737	22963456	3.59e-07	0.0205	S2_DM
2L_22620680_SNP	3.4e-07	0.0244	FBgn0262887	2L	22961737	22961737	22963456	2.18e-06	0.0177	DOC4_DM
2L_22620680_SNP	8.77e-08	0.0484	XLOC_006268	2R	21910	21910	24748	2.18e-06	0.0177	DOC4_DM
2L_22620680_SNP	4.77e-08	0.0499	XLOC_011651	2RHet	861402	861402	862533	2.18e-06	0.0177	DOC4_DM
2L_22620716_SNP	3.35e-06	0.0202	FBgn0040009	2L	22430400	22430400	22441183	2.49e-07	0.0205	S2_DM
2L_22620716_SNP	5.58e-09	0.0244	FBgn0262887	2L	22961737	22961737	22963456	2.49e-07	0.0205	S2_DM
2L_22621194_SNP	1.32e-07	0.0202	FBgn0040009	2L	22430400	22430400	22441183	4.39e-10	0.0205	S2_DM
2L_22621194_SNP	1.55e-06	0.0244	FBgn0262887	2L	22961737	22961737	22963456	4.39e-10	0.0205	S2_DM
2L_22621227_SNP	8.8e-07	0.0202	FBgn0040009	2L	22430400	22430400	22441183	1.03e-06	0.0205	S2_DM
2L_22621227_SNP	5.74e-08	0.0244	FBgn0262887	2L	22961737	22961737	22963456	1.03e-06	0.0205	S2_DM
2L_22621365_SNP	9.47e-10	0.0202	FBgn0040009	2L	22430400	22430400	22441183	9.55e-12	0.0205	S2_DM
2L_22621365_SNP	1.45e-07	0.0244	FBgn0262887	2L	22961737	22961737	22963456	9.55e-12	0.0205	S2_DM
2L_22622910_DEL	3.98e-07	0.0202	FBgn0040009	2L	22430400	22430400	22441183	3.25e-07	0.0177	DOC4_DM
2L_22622910_DEL	3.98e-07	0.0202	FBgn0040009	2L	22430400	22430400	22441183	5.15e-08	0.0205	S2_DM
2L_22622910_DEL	1.72e-06	0.0244	FBgn0262887	2L	22961737	22961737	22963456	3.25e-07	0.0177	DOC4_DM
2L_22622910_DEL	1.72e-06	0.0244	FBgn0262887	2L	22961737	22961737	22963456	5.15e-08	0.0205	S2_DM
2L_22622910_DEL	2.33e-06	0.0487	XLOC_011789	2RHet	3215567	3215567	3217239	5.15e-08	0.0205	S2_DM
2L_22622910_DEL	2.33e-06	0.0487	XLOC_011789	2RHet	3215567	3215567	3217239	3.25e-07	0.0177	DOC4_DM
2L_22622983_SNP	8.87e-10	0.0484	XLOC_006268	2R	21910	21910	24748	2.5e-10	0.0177	DOC4_DM
2L_22622983_SNP	1.11e-07	0.0499	XLOC_011651	2RHet	861402	861402	862533	2.5e-10	0.0177	DOC4_DM
2L_22623555_INS	1.09e-06	0.0202	FBgn0040009	2L	22430400	22430400	22441183	9.17e-06	0.0205	S2_DM
2L_22623555_INS	4.46e-07	0.0482	FBgn0085732	2RHet	337700	337700	340299	9.17e-06	0.0205	S2_DM
2L_22623948_SNP	1.86e-07	0.0484	XLOC_006268	2R	21910	21910	24748	3.78e-06	0.0177	DOC4_DM
2L_22624112_SNP	1.91e-11	0.0202	FBgn0040009	2L	22430400	22430400	22441183	4.01e-12	0.0205	S2_DM
2L_22624112_SNP	1.91e-11	0.0202	FBgn0040009	2L	22430400	22430400	22441183	7.1e-06	0.0177	DOC4_DM
2L_22624112_SNP	1.96e-07	0.0244	FBgn0262887	2L	22961737	22961737	22963456	4.01e-12	0.0205	S2_DM
2L_22624112_SNP	1.96e-07	0.0244	FBgn0262887	2L	22961737	22961737	22963456	7.1e-06	0.0177	DOC4_DM
2L_22624132_SNP	3.13e-10	0.0202	FBgn0040009	2L	22430400	22430400	22441183	6.98e-10	0.0205	S2_DM
2L_22624132_SNP	7.55e-07	0.0244	FBgn0262887	2L	22961737	22961737	22963456	6.98e-10	0.0205	S2_DM
2L_22624200_SNP	2.59e-07	0.0202	FBgn0040009	2L	22430400	22430400	22441183	3.01e-07	0.0205	S2_DM
2L_22624200_SNP	1.7e-09	0.0482	FBgn0085732	2RHet	337700	337700	340299	3.01e-07	0.0205	S2_DM
2L_22624200_SNP	2.02e-07	0.0498	XLOC_003055	2L	22739320	22739320	22739796	3.01e-07	0.0205	S2_DM
2L_22624913_SNP	1.97e-07	0.0202	FBgn0040009	2L	22430400	22430400	22441183	1.08e-08	0.0205	S2_DM
2L_22624913_SNP	2.32e-06	0.0244	FBgn0262887	2L	22961737	22961737	22963456	1.08e-08	0.0205	S2_DM
2L_22624987_SNP	1e-07	0.0202	FBgn0040009	2L	22430400	22430400	22441183	6e-09	0.0205	S2_DM
2L_22624987_SNP	7.81e-07	0.0244	FBgn0262887	2L	22961737	22961737	22963456	6e-09	0.0205	S2_DM
2L_22625859_DEL	5.77e-07	0.0244	FBgn0262887	2L	22961737	22961737	22963456	1.43e-09	0.0205	S2_DM
2L_22626018_SNP	8.93e-06	0.0202	FBgn0040009	2L	22430400	22430400	22441183	4.53e-09	0.0205	S2_DM
2L_22626018_SNP	1.7e-06	0.0244	FBgn0262887	2L	22961737	22961737	22963456	4.53e-09	0.0205	S2_DM
2L_22626018_SNP	2.06e-08	0.0498	XLOC_011921	2RHet	990729	989859	990729	4.53e-09	0.0205	S2_DM
2L_22626177_SNP	1.87e-06	0.0202	FBgn0040009	2L	22430400	22430400	22441183	2.5e-09	0.0205	S2_DM
2L_22626177_SNP	9.67e-07	0.0244	FBgn0262887	2L	22961737	22961737	22963456	2.5e-09	0.0205	S2_DM
2L_22626471_SNP	5e-07	0.0202	FBgn0040009	2L	22430400	22430400	22441183	3.97e-06	0.0177	DOC4_DM
2L_22626471_SNP	5e-07	0.0202	FBgn0040009	2L	22430400	22430400	22441183	1.21e-11	0.0205	S2_DM
2L_22626471_SNP	1.26e-06	0.0244	FBgn0262887	2L	22961737	22961737	22963456	1.21e-11	0.0205	S2_DM
2L_22626471_SNP	1.26e-06	0.0244	FBgn0262887	2L	22961737	22961737	22963456	3.97e-06	0.0177	DOC4_DM
2L_22626606_SNP	6.77e-06	0.0244	FBgn0262887	2L	22961737	22961737	22963456	6.13e-08	0.0205	S2_DM
2L_22626606_SNP	3.15e-08	0.0498	XLOC_011921	2RHet	990729	989859	990729	6.13e-08	0.0205	S2_DM
2L_22627042_SNP	1.24e-09	0.0244	FBgn0262887	2L	22961737	22961737	22963456	7.06e-07	0.0205	S2_DM
2L_22627042_SNP	3.35e-08	0.0493	XLOC_006087	2L	22736356	22705670	22736356	7.06e-07	0.0205	S2_DM
2L_22627443_SNP	2.21e-06	0.0202	FBgn0040009	2L	22430400	22430400	22441183	4.31e-06	0.0205	S2_DM
2L_22627444_SNP	2.71e-06	0.0202	FBgn0040009	2L	22430400	22430400	22441183	6.34e-06	0.0205	S2_DM
2L_22627601_SNP	1.66e-06	0.0484	XLOC_006268	2R	21910	21910	24748	1.82e-06	0.0177	DOC4_DM
2L_22627721_SNP	6.34e-08	0.0484	XLOC_006268	2R	21910	21910	24748	4.42e-06	0.0177	DOC4_DM
2L_22628760_SNP	5.02e-07	0.0482	FBgn0085732	2RHet	337700	337700	340299	4.91e-06	0.0205	S2_DM
2L_22629463_SNP	2.88e-08	0.0202	FBgn0040009	2L	22430400	22430400	22441183	9.4e-09	0.0205	S2_DM
2L_22629463_SNP	2.88e-08	0.0202	FBgn0040009	2L	22430400	22430400	22441183	4.85e-06	0.0177	DOC4_DM
2L_22629463_SNP	1.43e-06	0.0495	FBgn0069969	2RHet	77966	51350	77966	4.85e-06	0.0177	DOC4_DM
2L_22629463_SNP	1.43e-06	0.0495	FBgn0069969	2RHet	77966	51350	77966	9.4e-09	0.0205	S2_DM
2L_22629463_SNP	3.92e-07	0.0244	FBgn0262887	2L	22961737	22961737	22963456	4.85e-06	0.0177	DOC4_DM
2L_22629463_SNP	3.92e-07	0.0244	FBgn0262887	2L	22961737	22961737	22963456	9.4e-09	0.0205	S2_DM
2L_22629463_SNP	1.07e-06	0.0493	XLOC_006087	2L	22736356	22705670	22736356	4.85e-06	0.0177	DOC4_DM
2L_22629463_SNP	1.07e-06	0.0493	XLOC_006087	2L	22736356	22705670	22736356	9.4e-09	0.0205	S2_DM
2L_22629723_SNP	1.8e-11	0.0202	FBgn0040009	2L	22430400	22430400	22441183	4.23e-14	0.0205	S2_DM
2L_22629723_SNP	3.3e-08	0.0498	XLOC_003055	2L	22739320	22739320	22739796	4.23e-14	0.0205	S2_DM
2L_22629723_SNP	3.16e-06	0.0493	XLOC_006087	2L	22736356	22705670	22736356	4.23e-14	0.0205	S2_DM
2L_22629752_SNP	8.73e-07	0.0484	XLOC_006268	2R	21910	21910	24748	1.59e-06	0.0205	S2_DM
2L_22629843_SNP	4.04e-07	0.0484	XLOC_006268	2R	21910	21910	24748	2.52e-06	0.0205	S2_DM
2L_22629844_SNP	4.03e-07	0.0484	XLOC_006268	2R	21910	21910	24748	3.89e-06	0.0205	S2_DM
2L_22629981_SNP	7.47e-11	0.0202	FBgn0040009	2L	22430400	22430400	22441183	2.42e-13	0.0205	S2_DM
2L_22629981_SNP	1.19e-07	0.0498	XLOC_003055	2L	22739320	22739320	22739796	2.42e-13	0.0205	S2_DM
2L_22629992_SNP	1.28e-06	0.0484	XLOC_006268	2R	21910	21910	24748	4.62e-06	0.0205	S2_DM
2L_22630340_SNP	2.94e-08	0.0484	XLOC_006268	2R	21910	21910	24748	4.7e-10	0.0177	DOC4_DM
2L_22630472_INS	6.34e-07	0.0482	FBgn0085732	2RHet	337700	337700	340299	2.6e-06	0.0177	DOC4_DM
2L_22630472_INS	2.23e-06	0.0499	XLOC_011651	2RHet	861402	861402	862533	2.6e-06	0.0177	DOC4_DM
2L_22634322_SNP	5.81e-10	0	FBgn0261386	U	2295999	2295516	2295999	1.46e-07	0.0205	S2_DM
2L_22634322_SNP	5.81e-10	0	FBgn0261386	U	2295999	2295516	2295999	6.01e-08	0.0482	GTWIN_LTR
2L_22634322_SNP	1.3e-08	0.0498	XLOC_008884	2R	264145	262676	264145	6.01e-08	0.0482	GTWIN_LTR
2L_22634322_SNP	1.3e-08	0.0498	XLOC_008884	2R	264145	262676	264145	1.46e-07	0.0205	S2_DM
2L_22634322_SNP	2.43e-06	0.0487	XLOC_008887	2R	265845	265407	265845	6.01e-08	0.0482	GTWIN_LTR
2L_22634322_SNP	2.43e-06	0.0487	XLOC_008887	2R	265845	265407	265845	1.46e-07	0.0205	S2_DM
2L_22634322_SNP	2.95e-15	0.05	XLOC_011704	2RHet	1921599	1921599	1923490	1.46e-07	0.0205	S2_DM
2L_22634322_SNP	2.95e-15	0.05	XLOC_011704	2RHet	1921599	1921599	1923490	6.01e-08	0.0482	GTWIN_LTR
2L_22634322_SNP	1.03e-12	0.0494	XLOC_011705	2RHet	1924263	1924263	1926950	6.01e-08	0.0482	GTWIN_LTR
2L_22634322_SNP	1.03e-12	0.0494	XLOC_011705	2RHet	1924263	1924263	1926950	1.46e-07	0.0205	S2_DM
2L_22634322_SNP	3.39e-11	0.0492	XLOC_011786	2RHet	3198196	3198196	3199322	6.01e-08	0.0482	GTWIN_LTR
2L_22634322_SNP	3.39e-11	0.0492	XLOC_011786	2RHet	3198196	3198196	3199322	1.46e-07	0.0205	S2_DM
2L_22634322_SNP	2.17e-10	0.0487	XLOC_011789	2RHet	3215567	3215567	3217239	1.46e-07	0.0205	S2_DM
2L_22634322_SNP	2.17e-10	0.0487	XLOC_011789	2RHet	3215567	3215567	3217239	6.01e-08	0.0482	GTWIN_LTR
2L_22634322_SNP	8.04e-13	0.0498	XLOC_011921	2RHet	990729	989859	990729	1.46e-07	0.0205	S2_DM
2L_22634322_SNP	8.04e-13	0.0498	XLOC_011921	2RHet	990729	989859	990729	6.01e-08	0.0482	GTWIN_LTR
2L_22634322_SNP	3.61e-09	0.0488	XLOC_011977	2RHet	1591609	1590552	1591609	1.46e-07	0.0205	S2_DM
2L_22634322_SNP	3.61e-09	0.0488	XLOC_011977	2RHet	1591609	1590552	1591609	6.01e-08	0.0482	GTWIN_LTR
2L_22634322_SNP	2.54e-11	0.0488	XLOC_012081	2RHet	3151739	3149849	3151739	1.46e-07	0.0205	S2_DM
2L_22634322_SNP	2.54e-11	0.0488	XLOC_012081	2RHet	3151739	3149849	3151739	6.01e-08	0.0482	GTWIN_LTR
2L_22634468_SNP	8.43e-07	0.0498	XLOC_008884	2R	264145	262676	264145	2.64e-07	0.0205	S2_DM
2L_22634468_SNP	1.92e-07	0.05	XLOC_011704	2RHet	1921599	1921599	1923490	2.64e-07	0.0205	S2_DM
2L_22634468_SNP	1.6e-06	0.0494	XLOC_011705	2RHet	1924263	1924263	1926950	2.64e-07	0.0205	S2_DM
2L_22634468_SNP	1.68e-06	0.0487	XLOC_011789	2RHet	3215567	3215567	3217239	2.64e-07	0.0205	S2_DM
2L_22634468_SNP	2.9e-08	0.0498	XLOC_011921	2RHet	990729	989859	990729	2.64e-07	0.0205	S2_DM
2L_22634468_SNP	2.55e-07	0.0488	XLOC_012081	2RHet	3151739	3149849	3151739	2.64e-07	0.0205	S2_DM
2L_22634677_SNP	1.48e-07	0.0202	FBgn0040009	2L	22430400	22430400	22441183	8.95e-06	0.0205	S2_DM
2L_22635064_SNP	1.02e-08	0.0202	FBgn0040009	2L	22430400	22430400	22441183	2.95e-13	0.0205	S2_DM
2L_22635064_SNP	2.42e-08	0.0244	FBgn0262887	2L	22961737	22961737	22963456	2.95e-13	0.0205	S2_DM
2L_22635064_SNP	2.34e-08	0.0498	XLOC_011921	2RHet	990729	989859	990729	2.95e-13	0.0205	S2_DM
2L_22635730_SNP	4.35e-07	0.0482	FBgn0085732	2RHet	337700	337700	340299	2.61e-06	0.0205	S2_DM
2L_22635730_SNP	4.17e-08	0.0244	FBgn0262887	2L	22961737	22961737	22963456	2.61e-06	0.0205	S2_DM
2L_22635730_SNP	2.14e-06	0.0484	XLOC_006268	2R	21910	21910	24748	2.61e-06	0.0205	S2_DM
2L_22636065_SNP	1.44e-07	0.0244	FBgn0262887	2L	22961737	22961737	22963456	8.61e-06	0.0205	S2_DM
2L_22636130_SNP	1.45e-06	0.0202	FBgn0040009	2L	22430400	22430400	22441183	6.95e-08	0.0205	S2_DM
2L_22636130_SNP	6.02e-11	0.05	XLOC_011704	2RHet	1921599	1921599	1923490	6.95e-08	0.0205	S2_DM
2L_22636130_SNP	1.73e-08	0.0494	XLOC_011705	2RHet	1924263	1924263	1926950	6.95e-08	0.0205	S2_DM
2L_22636130_SNP	1.3e-06	0.0488	XLOC_011977	2RHet	1591609	1590552	1591609	6.95e-08	0.0205	S2_DM
2L_22637037_SNP	3.43e-06	0.0202	FBgn0040009	2L	22430400	22430400	22441183	2.75e-07	0.0205	S2_DM
2L_22637037_SNP	3.79e-11	0.05	XLOC_011704	2RHet	1921599	1921599	1923490	2.75e-07	0.0205	S2_DM
2L_22637037_SNP	7.06e-09	0.0494	XLOC_011705	2RHet	1924263	1924263	1926950	2.75e-07	0.0205	S2_DM
2L_22637037_SNP	6.64e-07	0.0488	XLOC_011977	2RHet	1591609	1590552	1591609	2.75e-07	0.0205	S2_DM
2L_22637037_SNP	1.17e-06	0.0488	XLOC_012081	2RHet	3151739	3149849	3151739	2.75e-07	0.0205	S2_DM
2L_22638210_SNP	9.36e-06	0.0202	FBgn0040009	2L	22430400	22430400	22441183	1.38e-06	0.0205	S2_DM
2L_22638384_SNP	2.03e-07	0.0495	FBgn0069969	2RHet	77966	51350	77966	3.68e-06	0.0205	S2_DM
2L_22639070_SNP	5.9e-09	0.0202	FBgn0040009	2L	22430400	22430400	22441183	1.3e-11	0.0205	S2_DM
2L_22639070_SNP	1.42e-06	0.0244	FBgn0262887	2L	22961737	22961737	22963456	1.3e-11	0.0205	S2_DM
2L_22639583_SNP	5.6e-09	0.0202	FBgn0040009	2L	22430400	22430400	22441183	1.13e-07	0.0205	S2_DM
2L_22639583_SNP	2.08e-09	0.0481	XLOC_003090	2L	22975606	22975606	22978044	1.13e-07	0.0205	S2_DM
2L_22639630_DEL	2.72e-07	0.0202	FBgn0040009	2L	22430400	22430400	22441183	8.96e-07	0.0205	S2_DM
2L_22640113_DEL	1.84e-06	0.0244	FBgn0262887	2L	22961737	22961737	22963456	1.14e-08	0.0205	S2_DM
2L_22640113_DEL	9.95e-09	0.0498	XLOC_011921	2RHet	990729	989859	990729	1.14e-08	0.0205	S2_DM
2L_22640132_DEL	6.2e-06	0.0244	FBgn0262887	2L	22961737	22961737	22963456	1.12e-09	0.0205	S2_DM
2L_22640272_SNP	8.01e-06	0.0244	FBgn0262887	2L	22961737	22961737	22963456	1.14e-07	0.0205	S2_DM
2L_22640272_SNP	8.01e-06	0.0244	FBgn0262887	2L	22961737	22961737	22963456	8.02e-09	0.0177	DOC4_DM
2L_22640272_SNP	1.35e-06	0.0484	XLOC_006268	2R	21910	21910	24748	8.02e-09	0.0177	DOC4_DM
2L_22640272_SNP	1.35e-06	0.0484	XLOC_006268	2R	21910	21910	24748	1.14e-07	0.0205	S2_DM
2L_22640272_SNP	4.64e-08	0.0499	XLOC_011651	2RHet	861402	861402	862533	1.14e-07	0.0205	S2_DM
2L_22640272_SNP	4.64e-08	0.0499	XLOC_011651	2RHet	861402	861402	862533	8.02e-09	0.0177	DOC4_DM
2L_22640315_SNP	2.46e-06	0.0202	FBgn0040009	2L	22430400	22430400	22441183	2.73e-10	0.0205	S2_DM
2L_22640315_SNP	2.33e-07	0.0244	FBgn0262887	2L	22961737	22961737	22963456	2.73e-10	0.0205	S2_DM
2L_22640315_SNP	1.6e-08	0.0498	XLOC_011921	2RHet	990729	989859	990729	2.73e-10	0.0205	S2_DM
2L_22640508_SNP	1.46e-07	0.0202	FBgn0040009	2L	22430400	22430400	22441183	1.01e-12	0.0205	S2_DM
2L_22640508_SNP	7.1e-08	0.0244	FBgn0262887	2L	22961737	22961737	22963456	1.01e-12	0.0205	S2_DM
2L_22640528_SNP	7.46e-08	0.0202	FBgn0040009	2L	22430400	22430400	22441183	3.93e-13	0.0205	S2_DM
2L_22640528_SNP	9.35e-08	0.0244	FBgn0262887	2L	22961737	22961737	22963456	3.93e-13	0.0205	S2_DM
2L_22640584_SNP	2.36e-07	0.0202	FBgn0040009	2L	22430400	22430400	22441183	7.51e-11	0.0205	S2_DM
2L_22640605_SNP	6.33e-08	0.0202	FBgn0040009	2L	22430400	22430400	22441183	6.26e-12	0.0205	S2_DM
2L_22640605_SNP	2.02e-07	0.0244	FBgn0262887	2L	22961737	22961737	22963456	6.26e-12	0.0205	S2_DM
2L_22640952_SNP	7.87e-09	0.0244	FBgn0262887	2L	22961737	22961737	22963456	5.34e-06	0.0177	DOC4_DM
2L_22641194_SNP	3.04e-09	0.0244	FBgn0262887	2L	22961737	22961737	22963456	2.39e-06	0.0177	DOC4_DM
2L_22641194_SNP	3.04e-09	0.0244	FBgn0262887	2L	22961737	22961737	22963456	4.68e-06	0.0205	S2_DM
2L_22642032_SNP	3.7e-09	0.0202	FBgn0040009	2L	22430400	22430400	22441183	2.68e-11	0.0205	S2_DM
2L_22642531_SNP	1.27e-08	0.0244	FBgn0262887	2L	22961737	22961737	22963456	6.21e-06	0.0205	S2_DM
2L_22642701_SNP	1.18e-11	0.0481	XLOC_003090	2L	22975606	22975606	22978044	4.46e-07	0.0205	S2_DM
2L_22642701_SNP	6.42e-07	0.05	XLOC_011704	2RHet	1921599	1921599	1923490	4.46e-07	0.0205	S2_DM
2L_22644091_SNP	4.2e-07	0.0484	XLOC_006268	2R	21910	21910	24748	1.68e-06	0.0177	DOC4_DM
2L_22644377_SNP	3.16e-07	0.0484	XLOC_006268	2R	21910	21910	24748	1.64e-07	0.0177	DOC4_DM
2L_22645682_SNP	2.13e-07	0.0202	FBgn0040009	2L	22430400	22430400	22441183	9.5e-09	0.0177	DOC4_DM
2L_22645682_SNP	2.13e-07	0.0202	FBgn0040009	2L	22430400	22430400	22441183	2.53e-09	0.0205	S2_DM
2L_22645682_SNP	4.25e-10	0.0244	FBgn0262887	2L	22961737	22961737	22963456	2.53e-09	0.0205	S2_DM
2L_22645682_SNP	4.25e-10	0.0244	FBgn0262887	2L	22961737	22961737	22963456	9.5e-09	0.0177	DOC4_DM
2L_22645682_SNP	7.48e-08	0.0484	XLOC_006268	2R	21910	21910	24748	2.53e-09	0.0205	S2_DM
2L_22645682_SNP	7.48e-08	0.0484	XLOC_006268	2R	21910	21910	24748	9.5e-09	0.0177	DOC4_DM
2L_22645682_SNP	1.57e-07	0.0499	XLOC_011651	2RHet	861402	861402	862533	2.53e-09	0.0205	S2_DM
2L_22645682_SNP	1.57e-07	0.0499	XLOC_011651	2RHet	861402	861402	862533	9.5e-09	0.0177	DOC4_DM
2L_22645682_SNP	8.17e-08	0.0489	XLOC_011853	2RHet	624599	623448	624599	9.5e-09	0.0177	DOC4_DM
2L_22645682_SNP	8.17e-08	0.0489	XLOC_011853	2RHet	624599	623448	624599	2.53e-09	0.0205	S2_DM
2L_22645706_SNP	4.12e-12	0.0202	FBgn0040009	2L	22430400	22430400	22441183	5.1e-11	0.0205	S2_DM
2L_22645706_SNP	4.12e-12	0.0202	FBgn0040009	2L	22430400	22430400	22441183	1.74e-06	0.0177	DOC4_DM
2L_22645706_SNP	3.21e-08	0.05	XLOC_011704	2RHet	1921599	1921599	1923490	1.74e-06	0.0177	DOC4_DM
2L_22645706_SNP	3.21e-08	0.05	XLOC_011704	2RHet	1921599	1921599	1923490	5.1e-11	0.0205	S2_DM
2L_22645843_SNP	3.37e-08	0.0484	XLOC_006268	2R	21910	21910	24748	1.82e-07	0.0177	DOC4_DM
2L_22645843_SNP	3.37e-08	0.0484	XLOC_006268	2R	21910	21910	24748	2.05e-06	0.0205	S2_DM
2L_22645843_SNP	2.98e-07	0.0499	XLOC_011651	2RHet	861402	861402	862533	1.82e-07	0.0177	DOC4_DM
2L_22645843_SNP	2.98e-07	0.0499	XLOC_011651	2RHet	861402	861402	862533	2.05e-06	0.0205	S2_DM
2L_22645882_SNP	3.54e-09	0.0484	XLOC_006268	2R	21910	21910	24748	3.79e-06	0.0205	S2_DM
2L_22645882_SNP	3.54e-09	0.0484	XLOC_006268	2R	21910	21910	24748	1.49e-08	0.0177	DOC4_DM
2L_22645882_SNP	5.56e-08	0.0499	XLOC_011651	2RHet	861402	861402	862533	1.49e-08	0.0177	DOC4_DM
2L_22645882_SNP	5.56e-08	0.0499	XLOC_011651	2RHet	861402	861402	862533	3.79e-06	0.0205	S2_DM
2L_22646669_SNP	5.8e-07	0.0202	FBgn0040009	2L	22430400	22430400	22441183	4.68e-10	0.0205	S2_DM
2L_22646669_SNP	6.5e-11	0.0244	FBgn0262887	2L	22961737	22961737	22963456	4.68e-10	0.0205	S2_DM
2L_22646669_SNP	1.29e-07	0.0498	XLOC_003055	2L	22739320	22739320	22739796	4.68e-10	0.0205	S2_DM
2L_22646669_SNP	2.45e-06	0.05	XLOC_011704	2RHet	1921599	1921599	1923490	4.68e-10	0.0205	S2_DM
2L_22647562_SNP	3.99e-09	0.05	XLOC_011704	2RHet	1921599	1921599	1923490	8.44e-08	0.0205	S2_DM
2L_22647562_SNP	7.72e-07	0.0494	XLOC_011705	2RHet	1924263	1924263	1926950	8.44e-08	0.0205	S2_DM
2L_22649186_INS	2.5e-07	0.0202	FBgn0040009	2L	22430400	22430400	22441183	2.76e-08	0.0205	S2_DM
2L_22649186_INS	4.83e-07	0.05	XLOC_011704	2RHet	1921599	1921599	1923490	2.76e-08	0.0205	S2_DM
2L_22649186_INS	2.04e-06	0.0488	XLOC_012081	2RHet	3151739	3149849	3151739	2.76e-08	0.0205	S2_DM
2L_22649236_SNP	1.22e-09	0.0202	FBgn0040009	2L	22430400	22430400	22441183	8.72e-11	0.0205	S2_DM
2L_22649236_SNP	1.51e-07	0.05	XLOC_011704	2RHet	1921599	1921599	1923490	8.72e-11	0.0205	S2_DM
2L_22650455_SNP	1.73e-10	0.0202	FBgn0040009	2L	22430400	22430400	22441183	5.28e-11	0.0205	S2_DM
2L_22650455_SNP	5.56e-07	0.0493	XLOC_006087	2L	22736356	22705670	22736356	5.28e-11	0.0205	S2_DM
2L_22650620_SNP	4.91e-07	0.0484	XLOC_006268	2R	21910	21910	24748	3.2e-06	0.0177	DOC4_DM
2L_22650620_SNP	4.91e-07	0.0484	XLOC_006268	2R	21910	21910	24748	2.38e-06	0.0205	S2_DM
2L_22650620_SNP	7.1e-07	0.0489	XLOC_011853	2RHet	624599	623448	624599	3.2e-06	0.0177	DOC4_DM
2L_22650620_SNP	7.1e-07	0.0489	XLOC_011853	2RHet	624599	623448	624599	2.38e-06	0.0205	S2_DM
2L_22650655_SNP	1.5e-06	0.0484	XLOC_006268	2R	21910	21910	24748	5.94e-06	0.0177	DOC4_DM
2L_22651831_SNP	5.26e-09	0.0202	FBgn0040009	2L	22430400	22430400	22441183	2.21e-07	0.0205	S2_DM
2L_22653622_SNP	5.33e-09	0.0202	FBgn0040009	2L	22430400	22430400	22441183	6.9e-14	0.0205	S2_DM
2L_22653622_SNP	5.33e-09	0.0202	FBgn0040009	2L	22430400	22430400	22441183	2.28e-07	0.0177	DOC4_DM
2L_22653622_SNP	1.02e-07	0.0244	FBgn0262887	2L	22961737	22961737	22963456	2.28e-07	0.0177	DOC4_DM
2L_22653622_SNP	1.02e-07	0.0244	FBgn0262887	2L	22961737	22961737	22963456	6.9e-14	0.0205	S2_DM
2L_22653622_SNP	3.35e-06	0.0499	XLOC_011651	2RHet	861402	861402	862533	2.28e-07	0.0177	DOC4_DM
2L_22653622_SNP	3.35e-06	0.0499	XLOC_011651	2RHet	861402	861402	862533	6.9e-14	0.0205	S2_DM
2L_22653622_SNP	1.85e-07	0.05	XLOC_011704	2RHet	1921599	1921599	1923490	6.9e-14	0.0205	S2_DM
2L_22653622_SNP	1.85e-07	0.05	XLOC_011704	2RHet	1921599	1921599	1923490	2.28e-07	0.0177	DOC4_DM
2L_22653622_SNP	8.29e-07	0.0489	XLOC_011853	2RHet	624599	623448	624599	6.9e-14	0.0205	S2_DM
2L_22653622_SNP	8.29e-07	0.0489	XLOC_011853	2RHet	624599	623448	624599	2.28e-07	0.0177	DOC4_DM
2L_22654158_INS	6.32e-06	0.0484	XLOC_006268	2R	21910	21910	24748	1.42e-06	0.0177	DOC4_DM
2L_22654184_SNP	6.28e-08	0.0496	XLOC_006067	2L	22624695	22624070	22624695	5.89e-06	0.0205	S2_DM
2L_22654184_SNP	6.28e-08	0.0496	XLOC_006067	2L	22624695	22624070	22624695	7.35e-07	0.0177	DOC4_DM
2L_22654184_SNP	2.47e-07	0.0484	XLOC_006268	2R	21910	21910	24748	5.89e-06	0.0205	S2_DM
2L_22654184_SNP	2.47e-07	0.0484	XLOC_006268	2R	21910	21910	24748	7.35e-07	0.0177	DOC4_DM
2L_22654973_SNP	1.14e-06	0.0202	FBgn0040009	2L	22430400	22430400	22441183	2.59e-06	0.0205	S2_DM
2L_22654973_SNP	5.25e-07	0.0489	XLOC_006069	2L	22631282	22629381	22631282	2.59e-06	0.0205	S2_DM
2L_22654973_SNP	1.47e-09	0.05	XLOC_011704	2RHet	1921599	1921599	1923490	2.59e-06	0.0205	S2_DM
2L_22654973_SNP	2.25e-07	0.0494	XLOC_011705	2RHet	1924263	1924263	1926950	2.59e-06	0.0205	S2_DM
2L_22654974_SNP	1.33e-06	0.0202	FBgn0040009	2L	22430400	22430400	22441183	1.35e-06	0.0205	S2_DM
2L_22654974_SNP	7.83e-10	0.0481	XLOC_003090	2L	22975606	22975606	22978044	1.35e-06	0.0205	S2_DM
2L_22654974_SNP	1.9e-07	0.0489	XLOC_006069	2L	22631282	22629381	22631282	1.35e-06	0.0205	S2_DM
2L_22654974_SNP	2.59e-09	0.05	XLOC_011704	2RHet	1921599	1921599	1923490	1.35e-06	0.0205	S2_DM
2L_22654974_SNP	9.25e-07	0.0494	XLOC_011705	2RHet	1924263	1924263	1926950	1.35e-06	0.0205	S2_DM
2L_22655480_SNP	5.58e-09	0.0202	FBgn0040009	2L	22430400	22430400	22441183	3.92e-07	0.0177	DOC4_DM
2L_22655480_SNP	5.58e-09	0.0202	FBgn0040009	2L	22430400	22430400	22441183	2.18e-14	0.0205	S2_DM
2L_22655480_SNP	3.49e-08	0.0244	FBgn0262887	2L	22961737	22961737	22963456	2.18e-14	0.0205	S2_DM
2L_22655480_SNP	3.49e-08	0.0244	FBgn0262887	2L	22961737	22961737	22963456	3.92e-07	0.0177	DOC4_DM
2L_22655480_SNP	1.47e-07	0.05	XLOC_011704	2RHet	1921599	1921599	1923490	2.18e-14	0.0205	S2_DM
2L_22655480_SNP	1.47e-07	0.05	XLOC_011704	2RHet	1921599	1921599	1923490	3.92e-07	0.0177	DOC4_DM
2L_22656571_SNP	4.58e-12	0.0202	FBgn0040009	2L	22430400	22430400	22441183	3.26e-07	0.0177	DOC4_DM
2L_22656571_SNP	4.58e-12	0.0202	FBgn0040009	2L	22430400	22430400	22441183	1.01e-11	0.0205	S2_DM
2L_22656571_SNP	1.01e-07	0.0244	FBgn0262887	2L	22961737	22961737	22963456	3.26e-07	0.0177	DOC4_DM
2L_22656571_SNP	1.01e-07	0.0244	FBgn0262887	2L	22961737	22961737	22963456	1.01e-11	0.0205	S2_DM
2L_22656571_SNP	1.96e-07	0.0498	XLOC_003055	2L	22739320	22739320	22739796	1.01e-11	0.0205	S2_DM
2L_22656571_SNP	1.96e-07	0.0498	XLOC_003055	2L	22739320	22739320	22739796	3.26e-07	0.0177	DOC4_DM
2L_22656571_SNP	7.02e-07	0.0493	XLOC_006087	2L	22736356	22705670	22736356	1.01e-11	0.0205	S2_DM
2L_22656571_SNP	7.02e-07	0.0493	XLOC_006087	2L	22736356	22705670	22736356	3.26e-07	0.0177	DOC4_DM
2L_22656571_SNP	1.76e-06	0.0499	XLOC_011651	2RHet	861402	861402	862533	1.01e-11	0.0205	S2_DM
2L_22656571_SNP	1.76e-06	0.0499	XLOC_011651	2RHet	861402	861402	862533	3.26e-07	0.0177	DOC4_DM
2L_22656571_SNP	5.91e-07	0.0489	XLOC_011853	2RHet	624599	623448	624599	3.26e-07	0.0177	DOC4_DM
2L_22656571_SNP	5.91e-07	0.0489	XLOC_011853	2RHet	624599	623448	624599	1.01e-11	0.0205	S2_DM
2L_22656594_SNP	2.18e-12	0.0202	FBgn0040009	2L	22430400	22430400	22441183	1.19e-12	0.0205	S2_DM
2L_22656594_SNP	2.18e-12	0.0202	FBgn0040009	2L	22430400	22430400	22441183	7.51e-08	0.0177	DOC4_DM
2L_22656594_SNP	5.88e-08	0.0244	FBgn0262887	2L	22961737	22961737	22963456	7.51e-08	0.0177	DOC4_DM
2L_22656594_SNP	5.88e-08	0.0244	FBgn0262887	2L	22961737	22961737	22963456	1.19e-12	0.0205	S2_DM
2L_22656594_SNP	5.09e-08	0.0498	XLOC_003055	2L	22739320	22739320	22739796	1.19e-12	0.0205	S2_DM
2L_22656594_SNP	5.09e-08	0.0498	XLOC_003055	2L	22739320	22739320	22739796	7.51e-08	0.0177	DOC4_DM
2L_22656594_SNP	6.09e-07	0.0493	XLOC_006087	2L	22736356	22705670	22736356	7.51e-08	0.0177	DOC4_DM
2L_22656594_SNP	6.09e-07	0.0493	XLOC_006087	2L	22736356	22705670	22736356	1.19e-12	0.0205	S2_DM
2L_22656594_SNP	1.64e-06	0.0499	XLOC_011651	2RHet	861402	861402	862533	1.19e-12	0.0205	S2_DM
2L_22656594_SNP	1.64e-06	0.0499	XLOC_011651	2RHet	861402	861402	862533	7.51e-08	0.0177	DOC4_DM
2L_22656594_SNP	3.96e-07	0.0489	XLOC_011853	2RHet	624599	623448	624599	1.19e-12	0.0205	S2_DM
2L_22656594_SNP	3.96e-07	0.0489	XLOC_011853	2RHet	624599	623448	624599	7.51e-08	0.0177	DOC4_DM
2L_22656613_SNP	2.93e-13	0.0202	FBgn0040009	2L	22430400	22430400	22441183	1.81e-13	0.0205	S2_DM
2L_22656613_SNP	2.93e-13	0.0202	FBgn0040009	2L	22430400	22430400	22441183	2.02e-08	0.0177	DOC4_DM
2L_22656613_SNP	7.23e-08	0.0244	FBgn0262887	2L	22961737	22961737	22963456	2.02e-08	0.0177	DOC4_DM
2L_22656613_SNP	7.23e-08	0.0244	FBgn0262887	2L	22961737	22961737	22963456	1.81e-13	0.0205	S2_DM
2L_22656613_SNP	5.41e-08	0.0498	XLOC_003055	2L	22739320	22739320	22739796	1.81e-13	0.0205	S2_DM
2L_22656613_SNP	5.41e-08	0.0498	XLOC_003055	2L	22739320	22739320	22739796	2.02e-08	0.0177	DOC4_DM
2L_22656613_SNP	5.2e-07	0.0493	XLOC_006087	2L	22736356	22705670	22736356	1.81e-13	0.0205	S2_DM
2L_22656613_SNP	5.2e-07	0.0493	XLOC_006087	2L	22736356	22705670	22736356	2.02e-08	0.0177	DOC4_DM
2L_22656613_SNP	1.05e-06	0.0499	XLOC_011651	2RHet	861402	861402	862533	2.02e-08	0.0177	DOC4_DM
2L_22656613_SNP	1.05e-06	0.0499	XLOC_011651	2RHet	861402	861402	862533	1.81e-13	0.0205	S2_DM
2L_22656613_SNP	3.77e-07	0.0489	XLOC_011853	2RHet	624599	623448	624599	2.02e-08	0.0177	DOC4_DM
2L_22656613_SNP	3.77e-07	0.0489	XLOC_011853	2RHet	624599	623448	624599	1.81e-13	0.0205	S2_DM
2L_22656746_SNP	1.76e-12	0.0202	FBgn0040009	2L	22430400	22430400	22441183	6.89e-08	0.0177	DOC4_DM
2L_22656746_SNP	1.76e-12	0.0202	FBgn0040009	2L	22430400	22430400	22441183	3.66e-14	0.0205	S2_DM
2L_22656746_SNP	1.7e-09	0.0244	FBgn0262887	2L	22961737	22961737	22963456	3.66e-14	0.0205	S2_DM
2L_22656746_SNP	1.7e-09	0.0244	FBgn0262887	2L	22961737	22961737	22963456	6.89e-08	0.0177	DOC4_DM
2L_22656746_SNP	4.16e-08	0.0498	XLOC_003055	2L	22739320	22739320	22739796	3.66e-14	0.0205	S2_DM
2L_22656746_SNP	4.16e-08	0.0498	XLOC_003055	2L	22739320	22739320	22739796	6.89e-08	0.0177	DOC4_DM
2L_22656746_SNP	2.5e-06	0.0493	XLOC_006087	2L	22736356	22705670	22736356	6.89e-08	0.0177	DOC4_DM
2L_22656746_SNP	2.5e-06	0.0493	XLOC_006087	2L	22736356	22705670	22736356	3.66e-14	0.0205	S2_DM
2L_22656746_SNP	1.25e-06	0.0499	XLOC_011651	2RHet	861402	861402	862533	6.89e-08	0.0177	DOC4_DM
2L_22656746_SNP	1.25e-06	0.0499	XLOC_011651	2RHet	861402	861402	862533	3.66e-14	0.0205	S2_DM
2L_22656746_SNP	9.07e-07	0.05	XLOC_011704	2RHet	1921599	1921599	1923490	3.66e-14	0.0205	S2_DM
2L_22656746_SNP	9.07e-07	0.05	XLOC_011704	2RHet	1921599	1921599	1923490	6.89e-08	0.0177	DOC4_DM
2L_22656746_SNP	8.91e-08	0.0489	XLOC_011853	2RHet	624599	623448	624599	3.66e-14	0.0205	S2_DM
2L_22656746_SNP	8.91e-08	0.0489	XLOC_011853	2RHet	624599	623448	624599	6.89e-08	0.0177	DOC4_DM
2L_22656858_SNP	8.12e-11	0.0202	FBgn0040009	2L	22430400	22430400	22441183	1.73e-13	0.0205	S2_DM
2L_22656858_SNP	8.12e-11	0.0202	FBgn0040009	2L	22430400	22430400	22441183	7.64e-08	0.0177	DOC4_DM
2L_22656858_SNP	1.75e-08	0.0244	FBgn0262887	2L	22961737	22961737	22963456	1.73e-13	0.0205	S2_DM
2L_22656858_SNP	1.75e-08	0.0244	FBgn0262887	2L	22961737	22961737	22963456	7.64e-08	0.0177	DOC4_DM
2L_22656858_SNP	2.75e-07	0.0498	XLOC_003055	2L	22739320	22739320	22739796	1.73e-13	0.0205	S2_DM
2L_22656858_SNP	2.75e-07	0.0498	XLOC_003055	2L	22739320	22739320	22739796	7.64e-08	0.0177	DOC4_DM
2L_22656858_SNP	1.27e-06	0.0499	XLOC_011651	2RHet	861402	861402	862533	1.73e-13	0.0205	S2_DM
2L_22656858_SNP	1.27e-06	0.0499	XLOC_011651	2RHet	861402	861402	862533	7.64e-08	0.0177	DOC4_DM
2L_22656858_SNP	1.08e-07	0.05	XLOC_011704	2RHet	1921599	1921599	1923490	7.64e-08	0.0177	DOC4_DM
2L_22656858_SNP	1.08e-07	0.05	XLOC_011704	2RHet	1921599	1921599	1923490	1.73e-13	0.0205	S2_DM
2L_22656858_SNP	3.1e-09	0.0489	XLOC_011853	2RHet	624599	623448	624599	1.73e-13	0.0205	S2_DM
2L_22656858_SNP	3.1e-09	0.0489	XLOC_011853	2RHet	624599	623448	624599	7.64e-08	0.0177	DOC4_DM
2L_22656967_SNP	5.6e-11	0.0202	FBgn0040009	2L	22430400	22430400	22441183	1.69e-13	0.0205	S2_DM
2L_22656967_SNP	5.6e-11	0.0202	FBgn0040009	2L	22430400	22430400	22441183	5.05e-08	0.0177	DOC4_DM
2L_22656967_SNP	6.76e-09	0.0244	FBgn0262887	2L	22961737	22961737	22963456	5.05e-08	0.0177	DOC4_DM
2L_22656967_SNP	6.76e-09	0.0244	FBgn0262887	2L	22961737	22961737	22963456	1.69e-13	0.0205	S2_DM
2L_22656967_SNP	2.17e-08	0.0499	XLOC_011651	2RHet	861402	861402	862533	5.05e-08	0.0177	DOC4_DM
2L_22656967_SNP	2.17e-08	0.0499	XLOC_011651	2RHet	861402	861402	862533	1.69e-13	0.0205	S2_DM
2L_22656967_SNP	6.18e-06	0.05	XLOC_011704	2RHet	1921599	1921599	1923490	1.69e-13	0.0205	S2_DM
2L_22656967_SNP	6.18e-06	0.05	XLOC_011704	2RHet	1921599	1921599	1923490	5.05e-08	0.0177	DOC4_DM
2L_22656967_SNP	2.73e-08	0.0489	XLOC_011853	2RHet	624599	623448	624599	5.05e-08	0.0177	DOC4_DM
2L_22656967_SNP	2.73e-08	0.0489	XLOC_011853	2RHet	624599	623448	624599	1.69e-13	0.0205	S2_DM
2L_22657065_SNP	4.37e-12	0.0202	FBgn0040009	2L	22430400	22430400	22441183	6.51e-08	0.0177	DOC4_DM
2L_22657065_SNP	4.37e-12	0.0202	FBgn0040009	2L	22430400	22430400	22441183	3.33e-16	0.0205	S2_DM
2L_22657065_SNP	1.09e-07	0.0244	FBgn0262887	2L	22961737	22961737	22963456	3.33e-16	0.0205	S2_DM
2L_22657065_SNP	1.09e-07	0.0244	FBgn0262887	2L	22961737	22961737	22963456	6.51e-08	0.0177	DOC4_DM
2L_22657065_SNP	2.32e-08	0.0498	XLOC_003055	2L	22739320	22739320	22739796	6.51e-08	0.0177	DOC4_DM
2L_22657065_SNP	2.32e-08	0.0498	XLOC_003055	2L	22739320	22739320	22739796	3.33e-16	0.0205	S2_DM
2L_22657065_SNP	3.98e-07	0.0499	XLOC_011651	2RHet	861402	861402	862533	3.33e-16	0.0205	S2_DM
2L_22657065_SNP	3.98e-07	0.0499	XLOC_011651	2RHet	861402	861402	862533	6.51e-08	0.0177	DOC4_DM
2L_22657065_SNP	2.46e-06	0.05	XLOC_011704	2RHet	1921599	1921599	1923490	3.33e-16	0.0205	S2_DM
2L_22657065_SNP	2.46e-06	0.05	XLOC_011704	2RHet	1921599	1921599	1923490	6.51e-08	0.0177	DOC4_DM
2L_22657065_SNP	3.6e-07	0.0489	XLOC_011853	2RHet	624599	623448	624599	3.33e-16	0.0205	S2_DM
2L_22657065_SNP	3.6e-07	0.0489	XLOC_011853	2RHet	624599	623448	624599	6.51e-08	0.0177	DOC4_DM
2L_22657080_INS	6.62e-12	0.0202	FBgn0040009	2L	22430400	22430400	22441183	5.61e-07	0.0177	DOC4_DM
2L_22657080_INS	6.62e-12	0.0202	FBgn0040009	2L	22430400	22430400	22441183	6.3e-15	0.0205	S2_DM
2L_22657080_INS	3.26e-07	0.0244	FBgn0262887	2L	22961737	22961737	22963456	6.3e-15	0.0205	S2_DM
2L_22657080_INS	3.26e-07	0.0244	FBgn0262887	2L	22961737	22961737	22963456	5.61e-07	0.0177	DOC4_DM
2L_22657080_INS	5.53e-08	0.0498	XLOC_003055	2L	22739320	22739320	22739796	6.3e-15	0.0205	S2_DM
2L_22657080_INS	5.53e-08	0.0498	XLOC_003055	2L	22739320	22739320	22739796	5.61e-07	0.0177	DOC4_DM
2L_22657080_INS	7.46e-07	0.0499	XLOC_011651	2RHet	861402	861402	862533	6.3e-15	0.0205	S2_DM
2L_22657080_INS	7.46e-07	0.0499	XLOC_011651	2RHet	861402	861402	862533	5.61e-07	0.0177	DOC4_DM
2L_22657080_INS	1.04e-07	0.0489	XLOC_011853	2RHet	624599	623448	624599	6.3e-15	0.0205	S2_DM
2L_22657080_INS	1.04e-07	0.0489	XLOC_011853	2RHet	624599	623448	624599	5.61e-07	0.0177	DOC4_DM
2L_22657292_SNP	4.36e-09	0.0202	FBgn0040009	2L	22430400	22430400	22441183	4.55e-15	0.0205	S2_DM
2L_22657292_SNP	4.36e-09	0.0202	FBgn0040009	2L	22430400	22430400	22441183	3.61e-09	0.0177	DOC4_DM
2L_22657292_SNP	8.86e-08	0.0244	FBgn0262887	2L	22961737	22961737	22963456	3.61e-09	0.0177	DOC4_DM
2L_22657292_SNP	8.86e-08	0.0244	FBgn0262887	2L	22961737	22961737	22963456	4.55e-15	0.0205	S2_DM
2L_22657292_SNP	6.39e-06	0.0484	XLOC_006268	2R	21910	21910	24748	4.55e-15	0.0205	S2_DM
2L_22657292_SNP	6.39e-06	0.0484	XLOC_006268	2R	21910	21910	24748	3.61e-09	0.0177	DOC4_DM
2L_22657292_SNP	6.44e-07	0.0499	XLOC_011651	2RHet	861402	861402	862533	4.55e-15	0.0205	S2_DM
2L_22657292_SNP	6.44e-07	0.0499	XLOC_011651	2RHet	861402	861402	862533	3.61e-09	0.0177	DOC4_DM
2L_22657292_SNP	5.47e-08	0.0489	XLOC_011853	2RHet	624599	623448	624599	3.61e-09	0.0177	DOC4_DM
2L_22657292_SNP	5.47e-08	0.0489	XLOC_011853	2RHet	624599	623448	624599	4.55e-15	0.0205	S2_DM
2L_22657485_SNP	4.84e-07	0.0202	FBgn0040009	2L	22430400	22430400	22441183	3.92e-07	0.0177	DOC4_DM
2L_22657485_SNP	4.84e-07	0.0202	FBgn0040009	2L	22430400	22430400	22441183	1.29e-12	0.0205	S2_DM
2L_22657485_SNP	2.1e-06	0.0484	XLOC_006268	2R	21910	21910	24748	1.29e-12	0.0205	S2_DM
2L_22657485_SNP	2.1e-06	0.0484	XLOC_006268	2R	21910	21910	24748	3.92e-07	0.0177	DOC4_DM
2L_22657485_SNP	2.89e-06	0.0499	XLOC_011651	2RHet	861402	861402	862533	3.92e-07	0.0177	DOC4_DM
2L_22657485_SNP	2.89e-06	0.0499	XLOC_011651	2RHet	861402	861402	862533	1.29e-12	0.0205	S2_DM
2L_22657672_SNP	6.96e-12	0.0202	FBgn0040009	2L	22430400	22430400	22441183	1.5e-15	0.0205	S2_DM
2L_22657672_SNP	6.96e-12	0.0202	FBgn0040009	2L	22430400	22430400	22441183	2.67e-09	0.0177	DOC4_DM
2L_22657672_SNP	5.94e-10	0.0244	FBgn0262887	2L	22961737	22961737	22963456	1.5e-15	0.0205	S2_DM
2L_22657672_SNP	5.94e-10	0.0244	FBgn0262887	2L	22961737	22961737	22963456	2.67e-09	0.0177	DOC4_DM
2L_22657672_SNP	1.7e-07	0.0498	XLOC_003055	2L	22739320	22739320	22739796	2.67e-09	0.0177	DOC4_DM
2L_22657672_SNP	1.7e-07	0.0498	XLOC_003055	2L	22739320	22739320	22739796	1.5e-15	0.0205	S2_DM
2L_22657672_SNP	3.23e-07	0.0493	XLOC_006087	2L	22736356	22705670	22736356	2.67e-09	0.0177	DOC4_DM
2L_22657672_SNP	3.23e-07	0.0493	XLOC_006087	2L	22736356	22705670	22736356	1.5e-15	0.0205	S2_DM
2L_22657672_SNP	2.93e-07	0.0499	XLOC_011651	2RHet	861402	861402	862533	1.5e-15	0.0205	S2_DM
2L_22657672_SNP	2.93e-07	0.0499	XLOC_011651	2RHet	861402	861402	862533	2.67e-09	0.0177	DOC4_DM
2L_22657672_SNP	3.23e-06	0.05	XLOC_011704	2RHet	1921599	1921599	1923490	1.5e-15	0.0205	S2_DM
2L_22657672_SNP	3.23e-06	0.05	XLOC_011704	2RHet	1921599	1921599	1923490	2.67e-09	0.0177	DOC4_DM
2L_22657672_SNP	5.43e-07	0.0489	XLOC_011853	2RHet	624599	623448	624599	1.5e-15	0.0205	S2_DM
2L_22657672_SNP	5.43e-07	0.0489	XLOC_011853	2RHet	624599	623448	624599	2.67e-09	0.0177	DOC4_DM
2L_22657749_SNP	2.89e-10	0.0202	FBgn0040009	2L	22430400	22430400	22441183	3.69e-15	0.0205	S2_DM
2L_22657749_SNP	2.89e-10	0.0202	FBgn0040009	2L	22430400	22430400	22441183	1.86e-07	0.0177	DOC4_DM
2L_22657749_SNP	4.06e-10	0.0244	FBgn0262887	2L	22961737	22961737	22963456	1.86e-07	0.0177	DOC4_DM
2L_22657749_SNP	4.06e-10	0.0244	FBgn0262887	2L	22961737	22961737	22963456	3.69e-15	0.0205	S2_DM
2L_22657749_SNP	2.03e-07	0.0498	XLOC_003055	2L	22739320	22739320	22739796	3.69e-15	0.0205	S2_DM
2L_22657749_SNP	2.03e-07	0.0498	XLOC_003055	2L	22739320	22739320	22739796	1.86e-07	0.0177	DOC4_DM
2L_22657749_SNP	8.35e-07	0.0493	XLOC_006087	2L	22736356	22705670	22736356	1.86e-07	0.0177	DOC4_DM
2L_22657749_SNP	8.35e-07	0.0493	XLOC_006087	2L	22736356	22705670	22736356	3.69e-15	0.0205	S2_DM
2L_22657749_SNP	1.93e-06	0.0499	XLOC_011651	2RHet	861402	861402	862533	1.86e-07	0.0177	DOC4_DM
2L_22657749_SNP	1.93e-06	0.0499	XLOC_011651	2RHet	861402	861402	862533	3.69e-15	0.0205	S2_DM
2L_22657749_SNP	1.83e-07	0.0489	XLOC_011853	2RHet	624599	623448	624599	3.69e-15	0.0205	S2_DM
2L_22657749_SNP	1.83e-07	0.0489	XLOC_011853	2RHet	624599	623448	624599	1.86e-07	0.0177	DOC4_DM
2L_22657842_SNP	3.48e-11	0.0202	FBgn0040009	2L	22430400	22430400	22441183	9.52e-15	0.0205	S2_DM
2L_22657842_SNP	3.48e-11	0.0202	FBgn0040009	2L	22430400	22430400	22441183	7.45e-09	0.0177	DOC4_DM
2L_22657842_SNP	9.28e-10	0.0244	FBgn0262887	2L	22961737	22961737	22963456	9.52e-15	0.0205	S2_DM
2L_22657842_SNP	9.28e-10	0.0244	FBgn0262887	2L	22961737	22961737	22963456	7.45e-09	0.0177	DOC4_DM
2L_22657842_SNP	1.06e-07	0.0498	XLOC_003055	2L	22739320	22739320	22739796	9.52e-15	0.0205	S2_DM
2L_22657842_SNP	1.06e-07	0.0498	XLOC_003055	2L	22739320	22739320	22739796	7.45e-09	0.0177	DOC4_DM
2L_22657842_SNP	1.45e-06	0.0493	XLOC_006087	2L	22736356	22705670	22736356	7.45e-09	0.0177	DOC4_DM
2L_22657842_SNP	1.45e-06	0.0493	XLOC_006087	2L	22736356	22705670	22736356	9.52e-15	0.0205	S2_DM
2L_22657842_SNP	8.67e-07	0.0499	XLOC_011651	2RHet	861402	861402	862533	9.52e-15	0.0205	S2_DM
2L_22657842_SNP	8.67e-07	0.0499	XLOC_011651	2RHet	861402	861402	862533	7.45e-09	0.0177	DOC4_DM
2L_22657842_SNP	4.74e-07	0.0489	XLOC_011853	2RHet	624599	623448	624599	9.52e-15	0.0205	S2_DM
2L_22657842_SNP	4.74e-07	0.0489	XLOC_011853	2RHet	624599	623448	624599	7.45e-09	0.0177	DOC4_DM
2L_22666840_SNP	1.91e-11	0.0202	FBgn0040009	2L	22430400	22430400	22441183	1.41e-13	0.0205	S2_DM
2L_22666840_SNP	1.91e-11	0.0202	FBgn0040009	2L	22430400	22430400	22441183	1.55e-08	0.0177	DOC4_DM
2L_22666840_SNP	1.89e-08	0.0244	FBgn0262887	2L	22961737	22961737	22963456	1.41e-13	0.0205	S2_DM
2L_22666840_SNP	1.89e-08	0.0244	FBgn0262887	2L	22961737	22961737	22963456	1.55e-08	0.0177	DOC4_DM
2L_22666840_SNP	9.94e-08	0.0498	XLOC_003055	2L	22739320	22739320	22739796	1.55e-08	0.0177	DOC4_DM
2L_22666840_SNP	9.94e-08	0.0498	XLOC_003055	2L	22739320	22739320	22739796	1.41e-13	0.0205	S2_DM
2L_22666840_SNP	3.22e-06	0.0493	XLOC_006087	2L	22736356	22705670	22736356	1.41e-13	0.0205	S2_DM
2L_22666840_SNP	3.22e-06	0.0493	XLOC_006087	2L	22736356	22705670	22736356	1.55e-08	0.0177	DOC4_DM
2L_22666840_SNP	8.3e-06	0.0484	XLOC_006268	2R	21910	21910	24748	1.41e-13	0.0205	S2_DM
2L_22666840_SNP	8.3e-06	0.0484	XLOC_006268	2R	21910	21910	24748	1.55e-08	0.0177	DOC4_DM
2L_22666840_SNP	1.32e-06	0.0499	XLOC_011651	2RHet	861402	861402	862533	1.55e-08	0.0177	DOC4_DM
2L_22666840_SNP	1.32e-06	0.0499	XLOC_011651	2RHet	861402	861402	862533	1.41e-13	0.0205	S2_DM
2L_22666840_SNP	2.23e-06	0.05	XLOC_011704	2RHet	1921599	1921599	1923490	1.55e-08	0.0177	DOC4_DM
2L_22666840_SNP	2.23e-06	0.05	XLOC_011704	2RHet	1921599	1921599	1923490	1.41e-13	0.0205	S2_DM
2L_22666884_SNP	2.27e-10	0.0202	FBgn0040009	2L	22430400	22430400	22441183	2.25e-08	0.0177	DOC4_DM
2L_22666884_SNP	2.27e-10	0.0202	FBgn0040009	2L	22430400	22430400	22441183	3.56e-14	0.0205	S2_DM
2L_22666884_SNP	8.34e-09	0.0244	FBgn0262887	2L	22961737	22961737	22963456	3.56e-14	0.0205	S2_DM
2L_22666884_SNP	8.34e-09	0.0244	FBgn0262887	2L	22961737	22961737	22963456	2.25e-08	0.0177	DOC4_DM
2L_22666884_SNP	1.42e-07	0.0498	XLOC_003055	2L	22739320	22739320	22739796	3.56e-14	0.0205	S2_DM
2L_22666884_SNP	1.42e-07	0.0498	XLOC_003055	2L	22739320	22739320	22739796	2.25e-08	0.0177	DOC4_DM
2L_22666884_SNP	2.36e-06	0.0493	XLOC_006087	2L	22736356	22705670	22736356	2.25e-08	0.0177	DOC4_DM
2L_22666884_SNP	2.36e-06	0.0493	XLOC_006087	2L	22736356	22705670	22736356	3.56e-14	0.0205	S2_DM
2L_22666884_SNP	1.62e-06	0.0499	XLOC_011651	2RHet	861402	861402	862533	2.25e-08	0.0177	DOC4_DM
2L_22666884_SNP	1.62e-06	0.0499	XLOC_011651	2RHet	861402	861402	862533	3.56e-14	0.0205	S2_DM
2L_22666884_SNP	7.85e-07	0.0489	XLOC_011853	2RHet	624599	623448	624599	2.25e-08	0.0177	DOC4_DM
2L_22666884_SNP	7.85e-07	0.0489	XLOC_011853	2RHet	624599	623448	624599	3.56e-14	0.0205	S2_DM
2L_22667515_SNP	5.41e-09	0.0202	FBgn0040009	2L	22430400	22430400	22441183	6.6e-15	0.0205	S2_DM
2L_22667515_SNP	5.41e-09	0.0202	FBgn0040009	2L	22430400	22430400	22441183	9.86e-09	0.0177	DOC4_DM
2L_22667515_SNP	4.19e-08	0.0244	FBgn0262887	2L	22961737	22961737	22963456	9.86e-09	0.0177	DOC4_DM
2L_22667515_SNP	4.19e-08	0.0244	FBgn0262887	2L	22961737	22961737	22963456	6.6e-15	0.0205	S2_DM
2L_22667515_SNP	7.4e-07	0.0499	XLOC_011651	2RHet	861402	861402	862533	6.6e-15	0.0205	S2_DM
2L_22667515_SNP	7.4e-07	0.0499	XLOC_011651	2RHet	861402	861402	862533	9.86e-09	0.0177	DOC4_DM
2L_22667515_SNP	4.18e-07	0.05	XLOC_011704	2RHet	1921599	1921599	1923490	6.6e-15	0.0205	S2_DM
2L_22667515_SNP	4.18e-07	0.05	XLOC_011704	2RHet	1921599	1921599	1923490	9.86e-09	0.0177	DOC4_DM
2L_22667515_SNP	4.55e-07	0.0489	XLOC_011853	2RHet	624599	623448	624599	6.6e-15	0.0205	S2_DM
2L_22667515_SNP	4.55e-07	0.0489	XLOC_011853	2RHet	624599	623448	624599	9.86e-09	0.0177	DOC4_DM
2L_22667645_DEL	1.12e-08	0.0202	FBgn0040009	2L	22430400	22430400	22441183	3.79e-14	0.0205	S2_DM
2L_22667645_DEL	1.12e-08	0.0202	FBgn0040009	2L	22430400	22430400	22441183	2.18e-07	0.0177	DOC4_DM
2L_22667645_DEL	8.26e-08	0.0244	FBgn0262887	2L	22961737	22961737	22963456	3.79e-14	0.0205	S2_DM
2L_22667645_DEL	8.26e-08	0.0244	FBgn0262887	2L	22961737	22961737	22963456	2.18e-07	0.0177	DOC4_DM
2L_22667645_DEL	6.27e-06	0.0484	XLOC_006268	2R	21910	21910	24748	3.79e-14	0.0205	S2_DM
2L_22667645_DEL	6.27e-06	0.0484	XLOC_006268	2R	21910	21910	24748	2.18e-07	0.0177	DOC4_DM
2L_22667645_DEL	1.41e-06	0.0499	XLOC_011651	2RHet	861402	861402	862533	2.18e-07	0.0177	DOC4_DM
2L_22667645_DEL	1.41e-06	0.0499	XLOC_011651	2RHet	861402	861402	862533	3.79e-14	0.0205	S2_DM
2L_22667645_DEL	1.07e-06	0.0489	XLOC_011853	2RHet	624599	623448	624599	3.79e-14	0.0205	S2_DM
2L_22667645_DEL	1.07e-06	0.0489	XLOC_011853	2RHet	624599	623448	624599	2.18e-07	0.0177	DOC4_DM
2L_22668097_SNP	6.41e-11	0.0202	FBgn0040009	2L	22430400	22430400	22441183	8.2e-13	0.0205	S2_DM
2L_22668097_SNP	6.41e-11	0.0202	FBgn0040009	2L	22430400	22430400	22441183	7.07e-11	0.0177	DOC4_DM
2L_22668097_SNP	8.3e-08	0.0244	FBgn0262887	2L	22961737	22961737	22963456	7.07e-11	0.0177	DOC4_DM
2L_22668097_SNP	8.3e-08	0.0244	FBgn0262887	2L	22961737	22961737	22963456	8.2e-13	0.0205	S2_DM
2L_22668097_SNP	5.21e-07	0.0498	XLOC_008884	2R	264145	262676	264145	8.2e-13	0.0205	S2_DM
2L_22668097_SNP	5.21e-07	0.0498	XLOC_008884	2R	264145	262676	264145	7.07e-11	0.0177	DOC4_DM
2L_22668097_SNP	2.32e-07	0.0489	XLOC_011853	2RHet	624599	623448	624599	8.2e-13	0.0205	S2_DM
2L_22668097_SNP	2.32e-07	0.0489	XLOC_011853	2RHet	624599	623448	624599	7.07e-11	0.0177	DOC4_DM
2L_22668119_SNP	5.09e-08	0.0202	FBgn0040009	2L	22430400	22430400	22441183	2.21e-07	0.0177	DOC4_DM
2L_22668119_SNP	5.09e-08	0.0202	FBgn0040009	2L	22430400	22430400	22441183	1.83e-11	0.0205	S2_DM
2L_22668469_SNP	2.28e-07	0.0202	FBgn0040009	2L	22430400	22430400	22441183	2.15e-10	0.0205	S2_DM
2L_22668469_SNP	3.3e-11	0.0244	FBgn0262887	2L	22961737	22961737	22963456	2.15e-10	0.0205	S2_DM
2L_22668469_SNP	2.18e-07	0.0498	XLOC_003055	2L	22739320	22739320	22739796	2.15e-10	0.0205	S2_DM
2L_22668721_DEL	8.28e-10	0.0202	FBgn0040009	2L	22430400	22430400	22441183	1e-12	0.0205	S2_DM
2L_22668721_DEL	8.28e-10	0.0202	FBgn0040009	2L	22430400	22430400	22441183	1.59e-09	0.0177	DOC4_DM
2L_22668721_DEL	2.46e-07	0.0244	FBgn0262887	2L	22961737	22961737	22963456	1.59e-09	0.0177	DOC4_DM
2L_22668721_DEL	2.46e-07	0.0244	FBgn0262887	2L	22961737	22961737	22963456	1e-12	0.0205	S2_DM
2L_22668721_DEL	8.15e-06	0.0484	XLOC_006268	2R	21910	21910	24748	1e-12	0.0205	S2_DM
2L_22668721_DEL	8.15e-06	0.0484	XLOC_006268	2R	21910	21910	24748	1.59e-09	0.0177	DOC4_DM
2L_22668721_DEL	6.17e-07	0.0499	XLOC_011651	2RHet	861402	861402	862533	1e-12	0.0205	S2_DM
2L_22668721_DEL	6.17e-07	0.0499	XLOC_011651	2RHet	861402	861402	862533	1.59e-09	0.0177	DOC4_DM
2L_22668929_SNP	3.31e-10	0.0202	FBgn0040009	2L	22430400	22430400	22441183	5.26e-14	0.0205	S2_DM
2L_22668929_SNP	3.31e-10	0.0202	FBgn0040009	2L	22430400	22430400	22441183	3.25e-08	0.0177	DOC4_DM
2L_22668929_SNP	6.29e-08	0.0244	FBgn0262887	2L	22961737	22961737	22963456	3.25e-08	0.0177	DOC4_DM
2L_22668929_SNP	6.29e-08	0.0244	FBgn0262887	2L	22961737	22961737	22963456	5.26e-14	0.0205	S2_DM
2L_22668929_SNP	1.27e-07	0.0498	XLOC_003055	2L	22739320	22739320	22739796	5.26e-14	0.0205	S2_DM
2L_22668929_SNP	1.27e-07	0.0498	XLOC_003055	2L	22739320	22739320	22739796	3.25e-08	0.0177	DOC4_DM
2L_22668929_SNP	7.55e-07	0.0499	XLOC_011651	2RHet	861402	861402	862533	3.25e-08	0.0177	DOC4_DM
2L_22668929_SNP	7.55e-07	0.0499	XLOC_011651	2RHet	861402	861402	862533	5.26e-14	0.0205	S2_DM
2L_22669091_SNP	1.6e-09	0.0202	FBgn0040009	2L	22430400	22430400	22441183	3e-07	0.0177	DOC4_DM
2L_22669091_SNP	1.6e-09	0.0202	FBgn0040009	2L	22430400	22430400	22441183	9.86e-11	0.0205	S2_DM
2L_22669091_SNP	1.7e-07	0.0244	FBgn0262887	2L	22961737	22961737	22963456	9.86e-11	0.0205	S2_DM
2L_22669091_SNP	1.7e-07	0.0244	FBgn0262887	2L	22961737	22961737	22963456	3e-07	0.0177	DOC4_DM
2L_22669091_SNP	7.75e-08	0.0498	XLOC_003055	2L	22739320	22739320	22739796	3e-07	0.0177	DOC4_DM
2L_22669091_SNP	7.75e-08	0.0498	XLOC_003055	2L	22739320	22739320	22739796	9.86e-11	0.0205	S2_DM
2L_22669091_SNP	3.21e-06	0.0499	XLOC_011651	2RHet	861402	861402	862533	9.86e-11	0.0205	S2_DM
2L_22669091_SNP	3.21e-06	0.0499	XLOC_011651	2RHet	861402	861402	862533	3e-07	0.0177	DOC4_DM
2L_22669091_SNP	4.33e-07	0.0489	XLOC_011853	2RHet	624599	623448	624599	3e-07	0.0177	DOC4_DM
2L_22669091_SNP	4.33e-07	0.0489	XLOC_011853	2RHet	624599	623448	624599	9.86e-11	0.0205	S2_DM
2L_22671091_SNP	8.06e-09	0.0202	FBgn0040009	2L	22430400	22430400	22441183	2.56e-08	0.0177	DOC4_DM
2L_22671091_SNP	8.06e-09	0.0202	FBgn0040009	2L	22430400	22430400	22441183	1.55e-14	0.0205	S2_DM
2L_22671091_SNP	1.19e-06	0.0244	FBgn0262887	2L	22961737	22961737	22963456	1.55e-14	0.0205	S2_DM
2L_22671091_SNP	1.19e-06	0.0244	FBgn0262887	2L	22961737	22961737	22963456	2.56e-08	0.0177	DOC4_DM
2L_22671091_SNP	8.72e-09	0.0498	XLOC_003055	2L	22739320	22739320	22739796	1.55e-14	0.0205	S2_DM
2L_22671091_SNP	8.72e-09	0.0498	XLOC_003055	2L	22739320	22739320	22739796	2.56e-08	0.0177	DOC4_DM
2L_22671091_SNP	6.59e-07	0.0499	XLOC_011651	2RHet	861402	861402	862533	1.55e-14	0.0205	S2_DM
2L_22671091_SNP	6.59e-07	0.0499	XLOC_011651	2RHet	861402	861402	862533	2.56e-08	0.0177	DOC4_DM
2L_22671237_SNP	2.11e-11	0.0202	FBgn0040009	2L	22430400	22430400	22441183	4.81e-08	0.0177	DOC4_DM
2L_22671237_SNP	2.11e-11	0.0202	FBgn0040009	2L	22430400	22430400	22441183	3.15e-13	0.0205	S2_DM
2L_22671237_SNP	1.17e-08	0.0244	FBgn0262887	2L	22961737	22961737	22963456	4.81e-08	0.0177	DOC4_DM
2L_22671237_SNP	1.17e-08	0.0244	FBgn0262887	2L	22961737	22961737	22963456	3.15e-13	0.0205	S2_DM
2L_22671237_SNP	3.93e-08	0.0498	XLOC_003055	2L	22739320	22739320	22739796	3.15e-13	0.0205	S2_DM
2L_22671237_SNP	3.93e-08	0.0498	XLOC_003055	2L	22739320	22739320	22739796	4.81e-08	0.0177	DOC4_DM
2L_22671237_SNP	8.68e-07	0.0499	XLOC_011651	2RHet	861402	861402	862533	3.15e-13	0.0205	S2_DM
2L_22671237_SNP	8.68e-07	0.0499	XLOC_011651	2RHet	861402	861402	862533	4.81e-08	0.0177	DOC4_DM
2L_22671237_SNP	7.74e-07	0.0489	XLOC_011853	2RHet	624599	623448	624599	4.81e-08	0.0177	DOC4_DM
2L_22671237_SNP	7.74e-07	0.0489	XLOC_011853	2RHet	624599	623448	624599	3.15e-13	0.0205	S2_DM
2L_22671263_SNP	5.63e-10	0.0202	FBgn0040009	2L	22430400	22430400	22441183	6.25e-13	0.0205	S2_DM
2L_22671263_SNP	5.63e-10	0.0202	FBgn0040009	2L	22430400	22430400	22441183	1.39e-07	0.0177	DOC4_DM
2L_22671263_SNP	1.21e-08	0.0244	FBgn0262887	2L	22961737	22961737	22963456	1.39e-07	0.0177	DOC4_DM
2L_22671263_SNP	1.21e-08	0.0244	FBgn0262887	2L	22961737	22961737	22963456	6.25e-13	0.0205	S2_DM
2L_22671263_SNP	2.54e-08	0.0498	XLOC_003055	2L	22739320	22739320	22739796	6.25e-13	0.0205	S2_DM
2L_22671263_SNP	2.54e-08	0.0498	XLOC_003055	2L	22739320	22739320	22739796	1.39e-07	0.0177	DOC4_DM
2L_22671263_SNP	2.66e-06	0.0493	XLOC_006087	2L	22736356	22705670	22736356	1.39e-07	0.0177	DOC4_DM
2L_22671263_SNP	2.66e-06	0.0493	XLOC_006087	2L	22736356	22705670	22736356	6.25e-13	0.0205	S2_DM
2L_22671263_SNP	1.61e-06	0.0499	XLOC_011651	2RHet	861402	861402	862533	1.39e-07	0.0177	DOC4_DM
2L_22671263_SNP	1.61e-06	0.0499	XLOC_011651	2RHet	861402	861402	862533	6.25e-13	0.0205	S2_DM
2L_22671263_SNP	3.85e-07	0.0489	XLOC_011853	2RHet	624599	623448	624599	6.25e-13	0.0205	S2_DM
2L_22671263_SNP	3.85e-07	0.0489	XLOC_011853	2RHet	624599	623448	624599	1.39e-07	0.0177	DOC4_DM
2L_22671418_SNP	2.58e-11	0.0202	FBgn0040009	2L	22430400	22430400	22441183	1.09e-14	0.0205	S2_DM
2L_22671418_SNP	2.58e-11	0.0202	FBgn0040009	2L	22430400	22430400	22441183	6.98e-09	0.0177	DOC4_DM
2L_22671418_SNP	4.17e-09	0.0244	FBgn0262887	2L	22961737	22961737	22963456	6.98e-09	0.0177	DOC4_DM
2L_22671418_SNP	4.17e-09	0.0244	FBgn0262887	2L	22961737	22961737	22963456	1.09e-14	0.0205	S2_DM
2L_22671418_SNP	6.91e-08	0.0498	XLOC_003055	2L	22739320	22739320	22739796	6.98e-09	0.0177	DOC4_DM
2L_22671418_SNP	6.91e-08	0.0498	XLOC_003055	2L	22739320	22739320	22739796	1.09e-14	0.0205	S2_DM
2L_22671418_SNP	2.16e-06	0.0493	XLOC_006087	2L	22736356	22705670	22736356	1.09e-14	0.0205	S2_DM
2L_22671418_SNP	2.16e-06	0.0493	XLOC_006087	2L	22736356	22705670	22736356	6.98e-09	0.0177	DOC4_DM
2L_22671418_SNP	9.4e-07	0.0499	XLOC_011651	2RHet	861402	861402	862533	1.09e-14	0.0205	S2_DM
2L_22671418_SNP	9.4e-07	0.0499	XLOC_011651	2RHet	861402	861402	862533	6.98e-09	0.0177	DOC4_DM
2L_22671418_SNP	5.54e-07	0.0489	XLOC_011853	2RHet	624599	623448	624599	1.09e-14	0.0205	S2_DM
2L_22671418_SNP	5.54e-07	0.0489	XLOC_011853	2RHet	624599	623448	624599	6.98e-09	0.0177	DOC4_DM
2L_22671483_SNP	2.24e-11	0.0202	FBgn0040009	2L	22430400	22430400	22441183	1.33e-14	0.0205	S2_DM
2L_22671483_SNP	2.24e-11	0.0202	FBgn0040009	2L	22430400	22430400	22441183	1.31e-07	0.0177	DOC4_DM
2L_22671483_SNP	2.42e-09	0.0244	FBgn0262887	2L	22961737	22961737	22963456	1.31e-07	0.0177	DOC4_DM
2L_22671483_SNP	2.42e-09	0.0244	FBgn0262887	2L	22961737	22961737	22963456	1.33e-14	0.0205	S2_DM
2L_22671483_SNP	1.11e-07	0.0498	XLOC_003055	2L	22739320	22739320	22739796	1.31e-07	0.0177	DOC4_DM
2L_22671483_SNP	1.11e-07	0.0498	XLOC_003055	2L	22739320	22739320	22739796	1.33e-14	0.0205	S2_DM
2L_22671483_SNP	3.95e-07	0.0493	XLOC_006087	2L	22736356	22705670	22736356	1.31e-07	0.0177	DOC4_DM
2L_22671483_SNP	3.95e-07	0.0493	XLOC_006087	2L	22736356	22705670	22736356	1.33e-14	0.0205	S2_DM
2L_22671483_SNP	1.56e-06	0.0499	XLOC_011651	2RHet	861402	861402	862533	1.33e-14	0.0205	S2_DM
2L_22671483_SNP	1.56e-06	0.0499	XLOC_011651	2RHet	861402	861402	862533	1.31e-07	0.0177	DOC4_DM
2L_22671483_SNP	7.9e-07	0.0489	XLOC_011853	2RHet	624599	623448	624599	1.31e-07	0.0177	DOC4_DM
2L_22671483_SNP	7.9e-07	0.0489	XLOC_011853	2RHet	624599	623448	624599	1.33e-14	0.0205	S2_DM
2L_22671531_SNP	2.78e-11	0.0202	FBgn0040009	2L	22430400	22430400	22441183	2.5e-08	0.0177	DOC4_DM
2L_22671531_SNP	2.78e-11	0.0202	FBgn0040009	2L	22430400	22430400	22441183	2.84e-16	0.0205	S2_DM
2L_22671531_SNP	4.89e-09	0.0244	FBgn0262887	2L	22961737	22961737	22963456	2.84e-16	0.0205	S2_DM
2L_22671531_SNP	4.89e-09	0.0244	FBgn0262887	2L	22961737	22961737	22963456	2.5e-08	0.0177	DOC4_DM
2L_22671531_SNP	1.46e-07	0.0498	XLOC_003055	2L	22739320	22739320	22739796	2.84e-16	0.0205	S2_DM
2L_22671531_SNP	1.46e-07	0.0498	XLOC_003055	2L	22739320	22739320	22739796	2.5e-08	0.0177	DOC4_DM
2L_22671531_SNP	8.88e-08	0.0499	XLOC_011651	2RHet	861402	861402	862533	2.5e-08	0.0177	DOC4_DM
2L_22671531_SNP	8.88e-08	0.0499	XLOC_011651	2RHet	861402	861402	862533	2.84e-16	0.0205	S2_DM
2L_22671531_SNP	4.78e-06	0.05	XLOC_011704	2RHet	1921599	1921599	1923490	2.5e-08	0.0177	DOC4_DM
2L_22671531_SNP	4.78e-06	0.05	XLOC_011704	2RHet	1921599	1921599	1923490	2.84e-16	0.0205	S2_DM
2L_22671531_SNP	1.09e-07	0.0489	XLOC_011853	2RHet	624599	623448	624599	2.84e-16	0.0205	S2_DM
2L_22671531_SNP	1.09e-07	0.0489	XLOC_011853	2RHet	624599	623448	624599	2.5e-08	0.0177	DOC4_DM
2L_22671796_SNP	3.8e-09	0.0202	FBgn0040009	2L	22430400	22430400	22441183	7.32e-15	0.0205	S2_DM
2L_22671796_SNP	3.8e-09	0.0202	FBgn0040009	2L	22430400	22430400	22441183	7.43e-08	0.0177	DOC4_DM
2L_22671796_SNP	7.14e-08	0.0244	FBgn0262887	2L	22961737	22961737	22963456	7.43e-08	0.0177	DOC4_DM
2L_22671796_SNP	7.14e-08	0.0244	FBgn0262887	2L	22961737	22961737	22963456	7.32e-15	0.0205	S2_DM
2L_22671796_SNP	3.15e-06	0.0493	XLOC_006087	2L	22736356	22705670	22736356	7.32e-15	0.0205	S2_DM
2L_22671796_SNP	3.15e-06	0.0493	XLOC_006087	2L	22736356	22705670	22736356	7.43e-08	0.0177	DOC4_DM
2L_22671796_SNP	1.74e-06	0.05	XLOC_011704	2RHet	1921599	1921599	1923490	7.32e-15	0.0205	S2_DM
2L_22671796_SNP	1.74e-06	0.05	XLOC_011704	2RHet	1921599	1921599	1923490	7.43e-08	0.0177	DOC4_DM
2L_22671796_SNP	3.97e-07	0.0489	XLOC_011853	2RHet	624599	623448	624599	7.32e-15	0.0205	S2_DM
2L_22671796_SNP	3.97e-07	0.0489	XLOC_011853	2RHet	624599	623448	624599	7.43e-08	0.0177	DOC4_DM
2L_22671850_SNP	2.48e-09	0.0484	XLOC_006268	2R	21910	21910	24748	8.49e-07	0.0205	S2_DM
2L_22671850_SNP	2.48e-09	0.0484	XLOC_006268	2R	21910	21910	24748	2.26e-07	0.0177	DOC4_DM
2L_22671850_SNP	4.28e-07	0.0499	XLOC_011651	2RHet	861402	861402	862533	8.49e-07	0.0205	S2_DM
2L_22671850_SNP	4.28e-07	0.0499	XLOC_011651	2RHet	861402	861402	862533	2.26e-07	0.0177	DOC4_DM
2L_22671850_SNP	9.87e-07	0.0489	XLOC_011853	2RHet	624599	623448	624599	8.49e-07	0.0205	S2_DM
2L_22671850_SNP	9.87e-07	0.0489	XLOC_011853	2RHet	624599	623448	624599	2.26e-07	0.0177	DOC4_DM
2L_22671951_DEL	2.09e-08	0.0202	FBgn0040009	2L	22430400	22430400	22441183	9.58e-14	0.0205	S2_DM
2L_22671951_DEL	2.09e-08	0.0202	FBgn0040009	2L	22430400	22430400	22441183	1.2e-08	0.0177	DOC4_DM
2L_22671951_DEL	5.13e-07	0.0244	FBgn0262887	2L	22961737	22961737	22963456	9.58e-14	0.0205	S2_DM
2L_22671951_DEL	5.13e-07	0.0244	FBgn0262887	2L	22961737	22961737	22963456	1.2e-08	0.0177	DOC4_DM
2L_22671961_SNP	4.12e-10	0.0202	FBgn0040009	2L	22430400	22430400	22441183	4.5e-10	0.0177	DOC4_DM
2L_22671961_SNP	4.12e-10	0.0202	FBgn0040009	2L	22430400	22430400	22441183	1.33e-13	0.0205	S2_DM
2L_22671961_SNP	3.39e-08	0.0244	FBgn0262887	2L	22961737	22961737	22963456	4.5e-10	0.0177	DOC4_DM
2L_22671961_SNP	3.39e-08	0.0244	FBgn0262887	2L	22961737	22961737	22963456	1.33e-13	0.0205	S2_DM
2L_22671961_SNP	1.96e-07	0.0498	XLOC_003055	2L	22739320	22739320	22739796	4.5e-10	0.0177	DOC4_DM
2L_22671961_SNP	1.96e-07	0.0498	XLOC_003055	2L	22739320	22739320	22739796	1.33e-13	0.0205	S2_DM
2L_22672173_SNP	4.01e-08	0.0202	FBgn0040009	2L	22430400	22430400	22441183	3.81e-09	0.0177	DOC4_DM
2L_22672173_SNP	4.01e-08	0.0202	FBgn0040009	2L	22430400	22430400	22441183	9.73e-12	0.0205	S2_DM
2L_22672173_SNP	6.95e-08	0.0244	FBgn0262887	2L	22961737	22961737	22963456	3.81e-09	0.0177	DOC4_DM
2L_22672173_SNP	6.95e-08	0.0244	FBgn0262887	2L	22961737	22961737	22963456	9.73e-12	0.0205	S2_DM
2L_22672173_SNP	1.2e-06	0.0484	XLOC_006268	2R	21910	21910	24748	9.73e-12	0.0205	S2_DM
2L_22672173_SNP	1.2e-06	0.0484	XLOC_006268	2R	21910	21910	24748	3.81e-09	0.0177	DOC4_DM
2L_22672173_SNP	9.63e-07	0.0499	XLOC_011651	2RHet	861402	861402	862533	3.81e-09	0.0177	DOC4_DM
2L_22672173_SNP	9.63e-07	0.0499	XLOC_011651	2RHet	861402	861402	862533	9.73e-12	0.0205	S2_DM
2L_22672173_SNP	9.4e-07	0.0489	XLOC_011853	2RHet	624599	623448	624599	3.81e-09	0.0177	DOC4_DM
2L_22672173_SNP	9.4e-07	0.0489	XLOC_011853	2RHet	624599	623448	624599	9.73e-12	0.0205	S2_DM
2L_22672220_SNP	2.81e-08	0.0202	FBgn0040009	2L	22430400	22430400	22441183	2.26e-12	0.0205	S2_DM
2L_22672220_SNP	2.81e-08	0.0202	FBgn0040009	2L	22430400	22430400	22441183	3.6e-08	0.0177	DOC4_DM
2L_22672220_SNP	3.7e-07	0.0244	FBgn0262887	2L	22961737	22961737	22963456	3.6e-08	0.0177	DOC4_DM
2L_22672220_SNP	3.7e-07	0.0244	FBgn0262887	2L	22961737	22961737	22963456	2.26e-12	0.0205	S2_DM
2L_22672220_SNP	9.13e-07	0.0484	XLOC_006268	2R	21910	21910	24748	3.6e-08	0.0177	DOC4_DM
2L_22672220_SNP	9.13e-07	0.0484	XLOC_006268	2R	21910	21910	24748	2.26e-12	0.0205	S2_DM
2L_22672220_SNP	2.17e-07	0.0499	XLOC_011651	2RHet	861402	861402	862533	2.26e-12	0.0205	S2_DM
2L_22672220_SNP	2.17e-07	0.0499	XLOC_011651	2RHet	861402	861402	862533	3.6e-08	0.0177	DOC4_DM
2L_22672220_SNP	3.47e-07	0.0489	XLOC_011853	2RHet	624599	623448	624599	2.26e-12	0.0205	S2_DM
2L_22672220_SNP	3.47e-07	0.0489	XLOC_011853	2RHet	624599	623448	624599	3.6e-08	0.0177	DOC4_DM
2L_22672361_SNP	6.95e-08	0.0202	FBgn0040009	2L	22430400	22430400	22441183	6.12e-13	0.0205	S2_DM
2L_22672361_SNP	6.95e-08	0.0202	FBgn0040009	2L	22430400	22430400	22441183	8.98e-10	0.0177	DOC4_DM
2L_22672361_SNP	3.5e-08	0.0244	FBgn0262887	2L	22961737	22961737	22963456	8.98e-10	0.0177	DOC4_DM
2L_22672361_SNP	3.5e-08	0.0244	FBgn0262887	2L	22961737	22961737	22963456	6.12e-13	0.0205	S2_DM
2L_22672361_SNP	5.34e-08	0.0484	XLOC_006268	2R	21910	21910	24748	8.98e-10	0.0177	DOC4_DM
2L_22672361_SNP	5.34e-08	0.0484	XLOC_006268	2R	21910	21910	24748	6.12e-13	0.0205	S2_DM
2L_22672361_SNP	2.64e-08	0.0499	XLOC_011651	2RHet	861402	861402	862533	8.98e-10	0.0177	DOC4_DM
2L_22672361_SNP	2.64e-08	0.0499	XLOC_011651	2RHet	861402	861402	862533	6.12e-13	0.0205	S2_DM
2L_22672361_SNP	1.23e-08	0.0489	XLOC_011853	2RHet	624599	623448	624599	8.98e-10	0.0177	DOC4_DM
2L_22672361_SNP	1.23e-08	0.0489	XLOC_011853	2RHet	624599	623448	624599	6.12e-13	0.0205	S2_DM
2L_22672712_SNP	2.46e-07	0.0202	FBgn0040009	2L	22430400	22430400	22441183	9.43e-11	0.0205	S2_DM
2L_22672712_SNP	2.46e-07	0.0202	FBgn0040009	2L	22430400	22430400	22441183	5.23e-06	0.0177	DOC4_DM
2L_22672712_SNP	4.48e-11	0.0244	FBgn0262887	2L	22961737	22961737	22963456	5.23e-06	0.0177	DOC4_DM
2L_22672712_SNP	4.48e-11	0.0244	FBgn0262887	2L	22961737	22961737	22963456	9.43e-11	0.0205	S2_DM
2L_22672712_SNP	1.21e-06	0.0499	XLOC_011651	2RHet	861402	861402	862533	9.43e-11	0.0205	S2_DM
2L_22672712_SNP	1.21e-06	0.0499	XLOC_011651	2RHet	861402	861402	862533	5.23e-06	0.0177	DOC4_DM
2L_22672949_SNP	2.43e-07	0.0244	FBgn0262887	2L	22961737	22961737	22963456	3.32e-09	0.0177	DOC4_DM
2L_22673668_SNP	9.71e-07	0.0202	FBgn0040009	2L	22430400	22430400	22441183	8.71e-08	0.0205	S2_DM
2L_22673668_SNP	5.18e-09	0.0498	XLOC_003055	2L	22739320	22739320	22739796	8.71e-08	0.0205	S2_DM
2L_22674094_SNP	1.21e-09	0.0498	XLOC_003055	2L	22739320	22739320	22739796	5.58e-08	0.0205	S2_DM
2L_22676805_SNP	9.23e-06	0.0202	FBgn0040009	2L	22430400	22430400	22441183	1.21e-07	0.0205	S2_DM
2L_22676805_SNP	1.42e-07	0.0498	XLOC_003055	2L	22739320	22739320	22739796	1.21e-07	0.0205	S2_DM
2L_22676884_DEL	2.8e-06	0.0202	FBgn0040009	2L	22430400	22430400	22441183	2.84e-08	0.0205	S2_DM
2L_22676884_DEL	1.44e-07	0.0498	XLOC_003055	2L	22739320	22739320	22739796	2.84e-08	0.0205	S2_DM
2L_22677776_SNP	7.86e-08	0.0202	FBgn0040009	2L	22430400	22430400	22441183	3.92e-06	0.0205	S2_DM
2L_22677776_SNP	2.4e-09	0.0498	XLOC_003055	2L	22739320	22739320	22739796	3.92e-06	0.0205	S2_DM
2L_22680865_SNP	4.13e-06	0.0202	FBgn0040009	2L	22430400	22430400	22441183	9.94e-09	0.0205	S2_DM
2L_22680865_SNP	7.77e-07	0.0482	FBgn0085732	2RHet	337700	337700	340299	9.94e-09	0.0205	S2_DM
2L_22680865_SNP	1.8e-11	0.0498	XLOC_003055	2L	22739320	22739320	22739796	9.94e-09	0.0205	S2_DM
2L_22680865_SNP	1.64e-08	0.0499	XLOC_011651	2RHet	861402	861402	862533	9.94e-09	0.0205	S2_DM
2L_22680934_DEL	1.61e-08	0.0202	FBgn0040009	2L	22430400	22430400	22441183	1.51e-16	0.0205	S2_DM
2L_22680934_DEL	1.61e-08	0.0202	FBgn0040009	2L	22430400	22430400	22441183	1.11e-06	0.0177	DOC4_DM
2L_22680934_DEL	4.64e-09	0.0244	FBgn0262887	2L	22961737	22961737	22963456	1.51e-16	0.0205	S2_DM
2L_22680934_DEL	4.64e-09	0.0244	FBgn0262887	2L	22961737	22961737	22963456	1.11e-06	0.0177	DOC4_DM
2L_22680934_DEL	1.14e-07	0.0498	XLOC_003055	2L	22739320	22739320	22739796	1.51e-16	0.0205	S2_DM
2L_22680934_DEL	1.14e-07	0.0498	XLOC_003055	2L	22739320	22739320	22739796	1.11e-06	0.0177	DOC4_DM
2L_22680934_DEL	2.64e-07	0.0493	XLOC_006087	2L	22736356	22705670	22736356	1.51e-16	0.0205	S2_DM
2L_22680934_DEL	2.64e-07	0.0493	XLOC_006087	2L	22736356	22705670	22736356	1.11e-06	0.0177	DOC4_DM
2L_22680934_DEL	1.88e-08	0.0499	XLOC_011651	2RHet	861402	861402	862533	1.11e-06	0.0177	DOC4_DM
2L_22680934_DEL	1.88e-08	0.0499	XLOC_011651	2RHet	861402	861402	862533	1.51e-16	0.0205	S2_DM
2L_22680934_DEL	8.46e-07	0.05	XLOC_011704	2RHet	1921599	1921599	1923490	1.51e-16	0.0205	S2_DM
2L_22680934_DEL	8.46e-07	0.05	XLOC_011704	2RHet	1921599	1921599	1923490	1.11e-06	0.0177	DOC4_DM
2L_22680934_DEL	1.76e-07	0.0489	XLOC_011853	2RHet	624599	623448	624599	1.51e-16	0.0205	S2_DM
2L_22680934_DEL	1.76e-07	0.0489	XLOC_011853	2RHet	624599	623448	624599	1.11e-06	0.0177	DOC4_DM
2L_22680967_DEL	1.33e-09	0.0202	FBgn0040009	2L	22430400	22430400	22441183	1.05e-17	0.0205	S2_DM
2L_22680967_DEL	1.33e-09	0.0202	FBgn0040009	2L	22430400	22430400	22441183	1.77e-08	0.0177	DOC4_DM
2L_22680967_DEL	1.23e-10	0.0244	FBgn0262887	2L	22961737	22961737	22963456	1.05e-17	0.0205	S2_DM
2L_22680967_DEL	1.23e-10	0.0244	FBgn0262887	2L	22961737	22961737	22963456	1.77e-08	0.0177	DOC4_DM
2L_22680967_DEL	3.02e-08	0.0498	XLOC_003055	2L	22739320	22739320	22739796	1.05e-17	0.0205	S2_DM
2L_22680967_DEL	3.02e-08	0.0498	XLOC_003055	2L	22739320	22739320	22739796	1.77e-08	0.0177	DOC4_DM
2L_22680967_DEL	6.62e-08	0.0493	XLOC_006087	2L	22736356	22705670	22736356	1.05e-17	0.0205	S2_DM
2L_22680967_DEL	6.62e-08	0.0493	XLOC_006087	2L	22736356	22705670	22736356	1.77e-08	0.0177	DOC4_DM
2L_22680967_DEL	5.17e-06	0.0484	XLOC_006268	2R	21910	21910	24748	1.05e-17	0.0205	S2_DM
2L_22680967_DEL	5.17e-06	0.0484	XLOC_006268	2R	21910	21910	24748	1.77e-08	0.0177	DOC4_DM
2L_22680967_DEL	2.39e-09	0.0499	XLOC_011651	2RHet	861402	861402	862533	1.77e-08	0.0177	DOC4_DM
2L_22680967_DEL	2.39e-09	0.0499	XLOC_011651	2RHet	861402	861402	862533	1.05e-17	0.0205	S2_DM
2L_22680967_DEL	1.67e-06	0.05	XLOC_011704	2RHet	1921599	1921599	1923490	1.05e-17	0.0205	S2_DM
2L_22680967_DEL	1.67e-06	0.05	XLOC_011704	2RHet	1921599	1921599	1923490	1.77e-08	0.0177	DOC4_DM
2L_22680967_DEL	2.87e-09	0.0489	XLOC_011853	2RHet	624599	623448	624599	1.05e-17	0.0205	S2_DM
2L_22680967_DEL	2.87e-09	0.0489	XLOC_011853	2RHet	624599	623448	624599	1.77e-08	0.0177	DOC4_DM
2L_22680974_SNP	4.23e-09	0.0202	FBgn0040009	2L	22430400	22430400	22441183	6.19e-17	0.0205	S2_DM
2L_22680974_SNP	4.23e-09	0.0202	FBgn0040009	2L	22430400	22430400	22441183	3.2e-08	0.0177	DOC4_DM
2L_22680974_SNP	6.16e-10	0.0244	FBgn0262887	2L	22961737	22961737	22963456	6.19e-17	0.0205	S2_DM
2L_22680974_SNP	6.16e-10	0.0244	FBgn0262887	2L	22961737	22961737	22963456	3.2e-08	0.0177	DOC4_DM
2L_22680974_SNP	6.85e-08	0.0498	XLOC_003055	2L	22739320	22739320	22739796	6.19e-17	0.0205	S2_DM
2L_22680974_SNP	6.85e-08	0.0498	XLOC_003055	2L	22739320	22739320	22739796	3.2e-08	0.0177	DOC4_DM
2L_22680974_SNP	5.58e-08	0.0493	XLOC_006087	2L	22736356	22705670	22736356	3.2e-08	0.0177	DOC4_DM
2L_22680974_SNP	5.58e-08	0.0493	XLOC_006087	2L	22736356	22705670	22736356	6.19e-17	0.0205	S2_DM
2L_22680974_SNP	1.59e-07	0.0484	XLOC_006268	2R	21910	21910	24748	6.19e-17	0.0205	S2_DM
2L_22680974_SNP	1.59e-07	0.0484	XLOC_006268	2R	21910	21910	24748	3.2e-08	0.0177	DOC4_DM
2L_22680974_SNP	1.48e-09	0.0499	XLOC_011651	2RHet	861402	861402	862533	3.2e-08	0.0177	DOC4_DM
2L_22680974_SNP	1.48e-09	0.0499	XLOC_011651	2RHet	861402	861402	862533	6.19e-17	0.0205	S2_DM
2L_22680974_SNP	1.8e-06	0.05	XLOC_011704	2RHet	1921599	1921599	1923490	6.19e-17	0.0205	S2_DM
2L_22680974_SNP	1.8e-06	0.05	XLOC_011704	2RHet	1921599	1921599	1923490	3.2e-08	0.0177	DOC4_DM
2L_22680974_SNP	3.09e-09	0.0489	XLOC_011853	2RHet	624599	623448	624599	3.2e-08	0.0177	DOC4_DM
2L_22680974_SNP	3.09e-09	0.0489	XLOC_011853	2RHet	624599	623448	624599	6.19e-17	0.0205	S2_DM
2L_22680976_SNP	5.1e-09	0.0202	FBgn0040009	2L	22430400	22430400	22441183	1e-16	0.0205	S2_DM
2L_22680976_SNP	5.1e-09	0.0202	FBgn0040009	2L	22430400	22430400	22441183	1.04e-07	0.0177	DOC4_DM
2L_22680976_SNP	3.58e-09	0.0244	FBgn0262887	2L	22961737	22961737	22963456	1e-16	0.0205	S2_DM
2L_22680976_SNP	3.58e-09	0.0244	FBgn0262887	2L	22961737	22961737	22963456	1.04e-07	0.0177	DOC4_DM
2L_22680976_SNP	5.78e-08	0.0498	XLOC_003055	2L	22739320	22739320	22739796	1.04e-07	0.0177	DOC4_DM
2L_22680976_SNP	5.78e-08	0.0498	XLOC_003055	2L	22739320	22739320	22739796	1e-16	0.0205	S2_DM
2L_22680976_SNP	5.09e-08	0.0493	XLOC_006087	2L	22736356	22705670	22736356	1.04e-07	0.0177	DOC4_DM
2L_22680976_SNP	5.09e-08	0.0493	XLOC_006087	2L	22736356	22705670	22736356	1e-16	0.0205	S2_DM
2L_22680976_SNP	3.14e-09	0.0499	XLOC_011651	2RHet	861402	861402	862533	1.04e-07	0.0177	DOC4_DM
2L_22680976_SNP	3.14e-09	0.0499	XLOC_011651	2RHet	861402	861402	862533	1e-16	0.0205	S2_DM
2L_22680976_SNP	3.4e-06	0.05	XLOC_011704	2RHet	1921599	1921599	1923490	1e-16	0.0205	S2_DM
2L_22680976_SNP	3.4e-06	0.05	XLOC_011704	2RHet	1921599	1921599	1923490	1.04e-07	0.0177	DOC4_DM
2L_22680976_SNP	3.46e-09	0.0489	XLOC_011853	2RHet	624599	623448	624599	1.04e-07	0.0177	DOC4_DM
2L_22680976_SNP	3.46e-09	0.0489	XLOC_011853	2RHet	624599	623448	624599	1e-16	0.0205	S2_DM
2L_22680990_SNP	3.71e-09	0.0202	FBgn0040009	2L	22430400	22430400	22441183	8.4e-08	0.0177	DOC4_DM
2L_22680990_SNP	3.71e-09	0.0202	FBgn0040009	2L	22430400	22430400	22441183	1.01e-16	0.0205	S2_DM
2L_22680990_SNP	1.1e-09	0.0244	FBgn0262887	2L	22961737	22961737	22963456	8.4e-08	0.0177	DOC4_DM
2L_22680990_SNP	1.1e-09	0.0244	FBgn0262887	2L	22961737	22961737	22963456	1.01e-16	0.0205	S2_DM
2L_22680990_SNP	1.58e-07	0.0498	XLOC_003055	2L	22739320	22739320	22739796	8.4e-08	0.0177	DOC4_DM
2L_22680990_SNP	1.58e-07	0.0498	XLOC_003055	2L	22739320	22739320	22739796	1.01e-16	0.0205	S2_DM
2L_22680990_SNP	1.51e-07	0.0493	XLOC_006087	2L	22736356	22705670	22736356	1.01e-16	0.0205	S2_DM
2L_22680990_SNP	1.51e-07	0.0493	XLOC_006087	2L	22736356	22705670	22736356	8.4e-08	0.0177	DOC4_DM
2L_22680990_SNP	1.08e-08	0.0499	XLOC_011651	2RHet	861402	861402	862533	8.4e-08	0.0177	DOC4_DM
2L_22680990_SNP	1.08e-08	0.0499	XLOC_011651	2RHet	861402	861402	862533	1.01e-16	0.0205	S2_DM
2L_22680990_SNP	2.55e-06	0.05	XLOC_011704	2RHet	1921599	1921599	1923490	8.4e-08	0.0177	DOC4_DM
2L_22680990_SNP	2.55e-06	0.05	XLOC_011704	2RHet	1921599	1921599	1923490	1.01e-16	0.0205	S2_DM
2L_22680990_SNP	6.6e-09	0.0489	XLOC_011853	2RHet	624599	623448	624599	8.4e-08	0.0177	DOC4_DM
2L_22680990_SNP	6.6e-09	0.0489	XLOC_011853	2RHet	624599	623448	624599	1.01e-16	0.0205	S2_DM
2L_22681005_SNP	3.46e-07	0.0202	FBgn0040009	2L	22430400	22430400	22441183	9.15e-09	0.0205	S2_DM
2L_22681005_SNP	3.48e-07	0.0482	FBgn0085732	2RHet	337700	337700	340299	9.15e-09	0.0205	S2_DM
2L_22681005_SNP	5.87e-10	0.0498	XLOC_003055	2L	22739320	22739320	22739796	9.15e-09	0.0205	S2_DM
2L_22681005_SNP	1.2e-08	0.0499	XLOC_011651	2RHet	861402	861402	862533	9.15e-09	0.0205	S2_DM
2L_22681025_SNP	1.01e-07	0.0202	FBgn0040009	2L	22430400	22430400	22441183	7.75e-09	0.0205	S2_DM
2L_22681025_SNP	4.45e-08	0.0482	FBgn0085732	2RHet	337700	337700	340299	7.75e-09	0.0205	S2_DM
2L_22681025_SNP	1.34e-09	0.0498	XLOC_003055	2L	22739320	22739320	22739796	7.75e-09	0.0205	S2_DM
2L_22681025_SNP	5.78e-09	0.0499	XLOC_011651	2RHet	861402	861402	862533	7.75e-09	0.0205	S2_DM
2L_22681324_DEL	9.51e-09	0.0202	FBgn0040009	2L	22430400	22430400	22441183	3.27e-07	0.0177	DOC4_DM
2L_22681324_DEL	9.51e-09	0.0202	FBgn0040009	2L	22430400	22430400	22441183	1.48e-17	0.0205	S2_DM
2L_22681324_DEL	7.85e-09	0.0244	FBgn0262887	2L	22961737	22961737	22963456	1.48e-17	0.0205	S2_DM
2L_22681324_DEL	7.85e-09	0.0244	FBgn0262887	2L	22961737	22961737	22963456	3.27e-07	0.0177	DOC4_DM
2L_22681324_DEL	1.15e-08	0.0498	XLOC_003055	2L	22739320	22739320	22739796	3.27e-07	0.0177	DOC4_DM
2L_22681324_DEL	1.15e-08	0.0498	XLOC_003055	2L	22739320	22739320	22739796	1.48e-17	0.0205	S2_DM
2L_22681324_DEL	2.34e-06	0.0493	XLOC_006087	2L	22736356	22705670	22736356	1.48e-17	0.0205	S2_DM
2L_22681324_DEL	2.34e-06	0.0493	XLOC_006087	2L	22736356	22705670	22736356	3.27e-07	0.0177	DOC4_DM
2L_22681324_DEL	9.75e-08	0.0499	XLOC_011651	2RHet	861402	861402	862533	3.27e-07	0.0177	DOC4_DM
2L_22681324_DEL	9.75e-08	0.0499	XLOC_011651	2RHet	861402	861402	862533	1.48e-17	0.0205	S2_DM
2L_22681324_DEL	2.75e-07	0.0489	XLOC_011853	2RHet	624599	623448	624599	1.48e-17	0.0205	S2_DM
2L_22681324_DEL	2.75e-07	0.0489	XLOC_011853	2RHet	624599	623448	624599	3.27e-07	0.0177	DOC4_DM
2L_22682100_SNP	1.09e-06	0.0202	FBgn0040009	2L	22430400	22430400	22441183	1.51e-09	0.0205	S2_DM
2L_22682100_SNP	3.92e-08	0.0482	FBgn0085732	2RHet	337700	337700	340299	1.51e-09	0.0205	S2_DM
2L_22682100_SNP	5.5e-11	0.0498	XLOC_003055	2L	22739320	22739320	22739796	1.51e-09	0.0205	S2_DM
2L_22682100_SNP	1.31e-08	0.0499	XLOC_011651	2RHet	861402	861402	862533	1.51e-09	0.0205	S2_DM
2L_22682244_SNP	6.5e-10	0.0202	FBgn0040009	2L	22430400	22430400	22441183	6.79e-18	0.0205	S2_DM
2L_22682244_SNP	6.5e-10	0.0202	FBgn0040009	2L	22430400	22430400	22441183	1.5e-08	0.0177	DOC4_DM
2L_22682244_SNP	1.08e-10	0.0244	FBgn0262887	2L	22961737	22961737	22963456	1.5e-08	0.0177	DOC4_DM
2L_22682244_SNP	1.08e-10	0.0244	FBgn0262887	2L	22961737	22961737	22963456	6.79e-18	0.0205	S2_DM
2L_22682244_SNP	8.05e-09	0.0498	XLOC_003055	2L	22739320	22739320	22739796	6.79e-18	0.0205	S2_DM
2L_22682244_SNP	8.05e-09	0.0498	XLOC_003055	2L	22739320	22739320	22739796	1.5e-08	0.0177	DOC4_DM
2L_22682244_SNP	4.73e-08	0.0493	XLOC_006087	2L	22736356	22705670	22736356	1.5e-08	0.0177	DOC4_DM
2L_22682244_SNP	4.73e-08	0.0493	XLOC_006087	2L	22736356	22705670	22736356	6.79e-18	0.0205	S2_DM
2L_22682244_SNP	5.07e-06	0.0484	XLOC_006268	2R	21910	21910	24748	1.5e-08	0.0177	DOC4_DM
2L_22682244_SNP	5.07e-06	0.0484	XLOC_006268	2R	21910	21910	24748	6.79e-18	0.0205	S2_DM
2L_22682244_SNP	2.51e-09	0.0499	XLOC_011651	2RHet	861402	861402	862533	1.5e-08	0.0177	DOC4_DM
2L_22682244_SNP	2.51e-09	0.0499	XLOC_011651	2RHet	861402	861402	862533	6.79e-18	0.0205	S2_DM
2L_22682244_SNP	7.14e-07	0.05	XLOC_011704	2RHet	1921599	1921599	1923490	1.5e-08	0.0177	DOC4_DM
2L_22682244_SNP	7.14e-07	0.05	XLOC_011704	2RHet	1921599	1921599	1923490	6.79e-18	0.0205	S2_DM
2L_22682244_SNP	1.56e-08	0.0489	XLOC_011853	2RHet	624599	623448	624599	6.79e-18	0.0205	S2_DM
2L_22682244_SNP	1.56e-08	0.0489	XLOC_011853	2RHet	624599	623448	624599	1.5e-08	0.0177	DOC4_DM
2L_22682245_SNP	2.55e-09	0.0202	FBgn0040009	2L	22430400	22430400	22441183	3.29e-17	0.0205	S2_DM
2L_22682245_SNP	2.55e-09	0.0202	FBgn0040009	2L	22430400	22430400	22441183	1.55e-08	0.0177	DOC4_DM
2L_22682245_SNP	2.83e-11	0.0244	FBgn0262887	2L	22961737	22961737	22963456	3.29e-17	0.0205	S2_DM
2L_22682245_SNP	2.83e-11	0.0244	FBgn0262887	2L	22961737	22961737	22963456	1.55e-08	0.0177	DOC4_DM
2L_22682245_SNP	2.63e-08	0.0498	XLOC_003055	2L	22739320	22739320	22739796	3.29e-17	0.0205	S2_DM
2L_22682245_SNP	2.63e-08	0.0498	XLOC_003055	2L	22739320	22739320	22739796	1.55e-08	0.0177	DOC4_DM
2L_22682245_SNP	8.03e-08	0.0493	XLOC_006087	2L	22736356	22705670	22736356	3.29e-17	0.0205	S2_DM
2L_22682245_SNP	8.03e-08	0.0493	XLOC_006087	2L	22736356	22705670	22736356	1.55e-08	0.0177	DOC4_DM
2L_22682245_SNP	4.75e-06	0.0484	XLOC_006268	2R	21910	21910	24748	1.55e-08	0.0177	DOC4_DM
2L_22682245_SNP	4.75e-06	0.0484	XLOC_006268	2R	21910	21910	24748	3.29e-17	0.0205	S2_DM
2L_22682245_SNP	2.57e-09	0.0499	XLOC_011651	2RHet	861402	861402	862533	3.29e-17	0.0205	S2_DM
2L_22682245_SNP	2.57e-09	0.0499	XLOC_011651	2RHet	861402	861402	862533	1.55e-08	0.0177	DOC4_DM
2L_22682245_SNP	1.63e-06	0.05	XLOC_011704	2RHet	1921599	1921599	1923490	3.29e-17	0.0205	S2_DM
2L_22682245_SNP	1.63e-06	0.05	XLOC_011704	2RHet	1921599	1921599	1923490	1.55e-08	0.0177	DOC4_DM
2L_22682245_SNP	1.03e-08	0.0489	XLOC_011853	2RHet	624599	623448	624599	1.55e-08	0.0177	DOC4_DM
2L_22682245_SNP	1.03e-08	0.0489	XLOC_011853	2RHet	624599	623448	624599	3.29e-17	0.0205	S2_DM
2L_22682283_SNP	2.92e-06	0.0244	FBgn0262887	2L	22961737	22961737	22963456	4.04e-08	0.0205	S2_DM
2L_22682283_SNP	2.92e-06	0.0244	FBgn0262887	2L	22961737	22961737	22963456	1.71e-07	0.0177	DOC4_DM
2L_22682283_SNP	8.79e-13	0.0484	XLOC_006268	2R	21910	21910	24748	4.04e-08	0.0205	S2_DM
2L_22682283_SNP	8.79e-13	0.0484	XLOC_006268	2R	21910	21910	24748	1.71e-07	0.0177	DOC4_DM
2L_22682283_SNP	3.18e-07	0.0479	XLOC_006282	2R	78321	78321	108264	4.04e-08	0.0205	S2_DM
2L_22682283_SNP	3.18e-07	0.0479	XLOC_006282	2R	78321	78321	108264	1.71e-07	0.0177	DOC4_DM
2L_22682283_SNP	1.6e-10	0.0499	XLOC_011651	2RHet	861402	861402	862533	1.71e-07	0.0177	DOC4_DM
2L_22682283_SNP	1.6e-10	0.0499	XLOC_011651	2RHet	861402	861402	862533	4.04e-08	0.0205	S2_DM
2L_22682283_SNP	6.68e-08	0.0489	XLOC_011853	2RHet	624599	623448	624599	1.71e-07	0.0177	DOC4_DM
2L_22682283_SNP	6.68e-08	0.0489	XLOC_011853	2RHet	624599	623448	624599	4.04e-08	0.0205	S2_DM
2L_22682283_SNP	3.08e-06	0.0329	XLOC_011942	2RHet	1262608	1258487	1262608	1.71e-07	0.0177	DOC4_DM
2L_22682283_SNP	3.08e-06	0.0329	XLOC_011942	2RHet	1262608	1258487	1262608	4.04e-08	0.0205	S2_DM
2L_22682324_SNP	2.44e-09	0.0202	FBgn0040009	2L	22430400	22430400	22441183	2.9e-08	0.0177	DOC4_DM
2L_22682324_SNP	2.44e-09	0.0202	FBgn0040009	2L	22430400	22430400	22441183	5.05e-18	0.0205	S2_DM
2L_22682324_SNP	2.8e-10	0.0244	FBgn0262887	2L	22961737	22961737	22963456	5.05e-18	0.0205	S2_DM
2L_22682324_SNP	2.8e-10	0.0244	FBgn0262887	2L	22961737	22961737	22963456	2.9e-08	0.0177	DOC4_DM
2L_22682324_SNP	2.14e-08	0.0498	XLOC_003055	2L	22739320	22739320	22739796	5.05e-18	0.0205	S2_DM
2L_22682324_SNP	2.14e-08	0.0498	XLOC_003055	2L	22739320	22739320	22739796	2.9e-08	0.0177	DOC4_DM
2L_22682324_SNP	3.78e-07	0.0493	XLOC_006087	2L	22736356	22705670	22736356	5.05e-18	0.0205	S2_DM
2L_22682324_SNP	3.78e-07	0.0493	XLOC_006087	2L	22736356	22705670	22736356	2.9e-08	0.0177	DOC4_DM
2L_22682324_SNP	6.23e-06	0.0484	XLOC_006268	2R	21910	21910	24748	2.9e-08	0.0177	DOC4_DM
2L_22682324_SNP	6.23e-06	0.0484	XLOC_006268	2R	21910	21910	24748	5.05e-18	0.0205	S2_DM
2L_22682324_SNP	2.19e-09	0.0499	XLOC_011651	2RHet	861402	861402	862533	5.05e-18	0.0205	S2_DM
2L_22682324_SNP	2.19e-09	0.0499	XLOC_011651	2RHet	861402	861402	862533	2.9e-08	0.0177	DOC4_DM
2L_22682324_SNP	2.64e-06	0.05	XLOC_011704	2RHet	1921599	1921599	1923490	2.9e-08	0.0177	DOC4_DM
2L_22682324_SNP	2.64e-06	0.05	XLOC_011704	2RHet	1921599	1921599	1923490	5.05e-18	0.0205	S2_DM
2L_22682324_SNP	3.03e-08	0.0489	XLOC_011853	2RHet	624599	623448	624599	2.9e-08	0.0177	DOC4_DM
2L_22682324_SNP	3.03e-08	0.0489	XLOC_011853	2RHet	624599	623448	624599	5.05e-18	0.0205	S2_DM
2L_22682684_SNP	1.2e-06	0.0202	FBgn0040009	2L	22430400	22430400	22441183	1.51e-09	0.0205	S2_DM
2L_22682684_SNP	4.53e-07	0.0482	FBgn0085732	2RHet	337700	337700	340299	1.51e-09	0.0205	S2_DM
2L_22682684_SNP	1.75e-10	0.0498	XLOC_003055	2L	22739320	22739320	22739796	1.51e-09	0.0205	S2_DM
2L_22682684_SNP	1.47e-07	0.0499	XLOC_011651	2RHet	861402	861402	862533	1.51e-09	0.0205	S2_DM
2L_22682743_SNP	6.02e-09	0.0202	FBgn0040009	2L	22430400	22430400	22441183	5.31e-08	0.0177	DOC4_DM
2L_22682743_SNP	6.02e-09	0.0202	FBgn0040009	2L	22430400	22430400	22441183	3e-18	0.0205	S2_DM
2L_22682743_SNP	9.15e-11	0.0244	FBgn0262887	2L	22961737	22961737	22963456	5.31e-08	0.0177	DOC4_DM
2L_22682743_SNP	9.15e-11	0.0244	FBgn0262887	2L	22961737	22961737	22963456	3e-18	0.0205	S2_DM
2L_22682743_SNP	4.1e-08	0.0498	XLOC_003055	2L	22739320	22739320	22739796	3e-18	0.0205	S2_DM
2L_22682743_SNP	4.1e-08	0.0498	XLOC_003055	2L	22739320	22739320	22739796	5.31e-08	0.0177	DOC4_DM
2L_22682743_SNP	1.06e-07	0.0493	XLOC_006087	2L	22736356	22705670	22736356	3e-18	0.0205	S2_DM
2L_22682743_SNP	1.06e-07	0.0493	XLOC_006087	2L	22736356	22705670	22736356	5.31e-08	0.0177	DOC4_DM
2L_22682743_SNP	7.98e-09	0.0499	XLOC_011651	2RHet	861402	861402	862533	3e-18	0.0205	S2_DM
2L_22682743_SNP	7.98e-09	0.0499	XLOC_011651	2RHet	861402	861402	862533	5.31e-08	0.0177	DOC4_DM
2L_22682743_SNP	1.6e-06	0.05	XLOC_011704	2RHet	1921599	1921599	1923490	3e-18	0.0205	S2_DM
2L_22682743_SNP	1.6e-06	0.05	XLOC_011704	2RHet	1921599	1921599	1923490	5.31e-08	0.0177	DOC4_DM
2L_22682743_SNP	1.27e-08	0.0489	XLOC_011853	2RHet	624599	623448	624599	5.31e-08	0.0177	DOC4_DM
2L_22682743_SNP	1.27e-08	0.0489	XLOC_011853	2RHet	624599	623448	624599	3e-18	0.0205	S2_DM
2L_22682744_SNP	1.58e-09	0.0202	FBgn0040009	2L	22430400	22430400	22441183	1.48e-18	0.0205	S2_DM
2L_22682744_SNP	1.58e-09	0.0202	FBgn0040009	2L	22430400	22430400	22441183	1.56e-08	0.0177	DOC4_DM
2L_22682744_SNP	1.04e-10	0.0244	FBgn0262887	2L	22961737	22961737	22963456	1.56e-08	0.0177	DOC4_DM
2L_22682744_SNP	1.04e-10	0.0244	FBgn0262887	2L	22961737	22961737	22963456	1.48e-18	0.0205	S2_DM
2L_22682744_SNP	1.69e-08	0.0498	XLOC_003055	2L	22739320	22739320	22739796	1.48e-18	0.0205	S2_DM
2L_22682744_SNP	1.69e-08	0.0498	XLOC_003055	2L	22739320	22739320	22739796	1.56e-08	0.0177	DOC4_DM
2L_22682744_SNP	1.63e-07	0.0493	XLOC_006087	2L	22736356	22705670	22736356	1.56e-08	0.0177	DOC4_DM
2L_22682744_SNP	1.63e-07	0.0493	XLOC_006087	2L	22736356	22705670	22736356	1.48e-18	0.0205	S2_DM
2L_22682744_SNP	3.39e-06	0.0484	XLOC_006268	2R	21910	21910	24748	1.48e-18	0.0205	S2_DM
2L_22682744_SNP	3.39e-06	0.0484	XLOC_006268	2R	21910	21910	24748	1.56e-08	0.0177	DOC4_DM
2L_22682744_SNP	2e-09	0.0499	XLOC_011651	2RHet	861402	861402	862533	1.56e-08	0.0177	DOC4_DM
2L_22682744_SNP	2e-09	0.0499	XLOC_011651	2RHet	861402	861402	862533	1.48e-18	0.0205	S2_DM
2L_22682744_SNP	2.64e-06	0.05	XLOC_011704	2RHet	1921599	1921599	1923490	1.56e-08	0.0177	DOC4_DM
2L_22682744_SNP	2.64e-06	0.05	XLOC_011704	2RHet	1921599	1921599	1923490	1.48e-18	0.0205	S2_DM
2L_22682744_SNP	1.07e-08	0.0489	XLOC_011853	2RHet	624599	623448	624599	1.48e-18	0.0205	S2_DM
2L_22682744_SNP	1.07e-08	0.0489	XLOC_011853	2RHet	624599	623448	624599	1.56e-08	0.0177	DOC4_DM
2L_22682955_SNP	7.27e-10	0.0202	FBgn0040009	2L	22430400	22430400	22441183	1.42e-07	0.0177	DOC4_DM
2L_22682955_SNP	7.27e-10	0.0202	FBgn0040009	2L	22430400	22430400	22441183	3.84e-18	0.0205	S2_DM
2L_22682955_SNP	2.77e-09	0.0244	FBgn0262887	2L	22961737	22961737	22963456	1.42e-07	0.0177	DOC4_DM
2L_22682955_SNP	2.77e-09	0.0244	FBgn0262887	2L	22961737	22961737	22963456	3.84e-18	0.0205	S2_DM
2L_22682955_SNP	5.79e-08	0.0498	XLOC_003055	2L	22739320	22739320	22739796	1.42e-07	0.0177	DOC4_DM
2L_22682955_SNP	5.79e-08	0.0498	XLOC_003055	2L	22739320	22739320	22739796	3.84e-18	0.0205	S2_DM
2L_22682955_SNP	3.03e-07	0.0493	XLOC_006087	2L	22736356	22705670	22736356	1.42e-07	0.0177	DOC4_DM
2L_22682955_SNP	3.03e-07	0.0493	XLOC_006087	2L	22736356	22705670	22736356	3.84e-18	0.0205	S2_DM
2L_22682955_SNP	1.05e-08	0.0499	XLOC_011651	2RHet	861402	861402	862533	3.84e-18	0.0205	S2_DM
2L_22682955_SNP	1.05e-08	0.0499	XLOC_011651	2RHet	861402	861402	862533	1.42e-07	0.0177	DOC4_DM
2L_22682955_SNP	9.39e-09	0.0489	XLOC_011853	2RHet	624599	623448	624599	3.84e-18	0.0205	S2_DM
2L_22682955_SNP	9.39e-09	0.0489	XLOC_011853	2RHet	624599	623448	624599	1.42e-07	0.0177	DOC4_DM
2L_22683056_SNP	5.58e-07	0.0202	FBgn0040009	2L	22430400	22430400	22441183	9.98e-06	0.0177	DOC4_DM
2L_22683056_SNP	5.58e-07	0.0202	FBgn0040009	2L	22430400	22430400	22441183	7.55e-10	0.0205	S2_DM
2L_22683056_SNP	1.61e-08	0.0482	FBgn0085732	2RHet	337700	337700	340299	9.98e-06	0.0177	DOC4_DM
2L_22683056_SNP	1.61e-08	0.0482	FBgn0085732	2RHet	337700	337700	340299	7.55e-10	0.0205	S2_DM
2L_22683056_SNP	5.28e-11	0.0498	XLOC_003055	2L	22739320	22739320	22739796	7.55e-10	0.0205	S2_DM
2L_22683056_SNP	5.28e-11	0.0498	XLOC_003055	2L	22739320	22739320	22739796	9.98e-06	0.0177	DOC4_DM
2L_22683056_SNP	8.6e-09	0.0499	XLOC_011651	2RHet	861402	861402	862533	7.55e-10	0.0205	S2_DM
2L_22683056_SNP	8.6e-09	0.0499	XLOC_011651	2RHet	861402	861402	862533	9.98e-06	0.0177	DOC4_DM
2L_22683669_SNP	6.45e-09	0.0202	FBgn0040009	2L	22430400	22430400	22441183	3.42e-17	0.0205	S2_DM
2L_22683669_SNP	6.45e-09	0.0202	FBgn0040009	2L	22430400	22430400	22441183	1.14e-08	0.0177	DOC4_DM
2L_22683669_SNP	1.1e-08	0.0244	FBgn0262887	2L	22961737	22961737	22963456	3.42e-17	0.0205	S2_DM
2L_22683669_SNP	1.1e-08	0.0244	FBgn0262887	2L	22961737	22961737	22963456	1.14e-08	0.0177	DOC4_DM
2L_22683669_SNP	1.06e-09	0.0498	XLOC_003055	2L	22739320	22739320	22739796	3.42e-17	0.0205	S2_DM
2L_22683669_SNP	1.06e-09	0.0498	XLOC_003055	2L	22739320	22739320	22739796	1.14e-08	0.0177	DOC4_DM
2L_22683669_SNP	8.73e-08	0.0493	XLOC_006087	2L	22736356	22705670	22736356	3.42e-17	0.0205	S2_DM
2L_22683669_SNP	8.73e-08	0.0493	XLOC_006087	2L	22736356	22705670	22736356	1.14e-08	0.0177	DOC4_DM
2L_22683669_SNP	8.05e-06	0.0484	XLOC_006268	2R	21910	21910	24748	3.42e-17	0.0205	S2_DM
2L_22683669_SNP	8.05e-06	0.0484	XLOC_006268	2R	21910	21910	24748	1.14e-08	0.0177	DOC4_DM
2L_22683669_SNP	1.22e-09	0.0499	XLOC_011651	2RHet	861402	861402	862533	3.42e-17	0.0205	S2_DM
2L_22683669_SNP	1.22e-09	0.0499	XLOC_011651	2RHet	861402	861402	862533	1.14e-08	0.0177	DOC4_DM
2L_22683669_SNP	2.61e-08	0.0489	XLOC_011853	2RHet	624599	623448	624599	3.42e-17	0.0205	S2_DM
2L_22683669_SNP	2.61e-08	0.0489	XLOC_011853	2RHet	624599	623448	624599	1.14e-08	0.0177	DOC4_DM
2L_22683669_SNP	4.82e-06	0.0329	XLOC_011942	2RHet	1262608	1258487	1262608	1.14e-08	0.0177	DOC4_DM
2L_22683669_SNP	4.82e-06	0.0329	XLOC_011942	2RHet	1262608	1258487	1262608	3.42e-17	0.0205	S2_DM
2L_22683972_SNP	3.43e-09	0.0202	FBgn0040009	2L	22430400	22430400	22441183	7.86e-18	0.0205	S2_DM
2L_22683972_SNP	3.43e-09	0.0202	FBgn0040009	2L	22430400	22430400	22441183	4.64e-08	0.0177	DOC4_DM
2L_22683972_SNP	2.54e-10	0.0244	FBgn0262887	2L	22961737	22961737	22963456	7.86e-18	0.0205	S2_DM
2L_22683972_SNP	2.54e-10	0.0244	FBgn0262887	2L	22961737	22961737	22963456	4.64e-08	0.0177	DOC4_DM
2L_22683972_SNP	1.33e-08	0.0498	XLOC_003055	2L	22739320	22739320	22739796	7.86e-18	0.0205	S2_DM
2L_22683972_SNP	1.33e-08	0.0498	XLOC_003055	2L	22739320	22739320	22739796	4.64e-08	0.0177	DOC4_DM
2L_22683972_SNP	2.41e-07	0.0493	XLOC_006087	2L	22736356	22705670	22736356	4.64e-08	0.0177	DOC4_DM
2L_22683972_SNP	2.41e-07	0.0493	XLOC_006087	2L	22736356	22705670	22736356	7.86e-18	0.0205	S2_DM
2L_22683972_SNP	7.78e-06	0.0484	XLOC_006268	2R	21910	21910	24748	4.64e-08	0.0177	DOC4_DM
2L_22683972_SNP	7.78e-06	0.0484	XLOC_006268	2R	21910	21910	24748	7.86e-18	0.0205	S2_DM
2L_22683972_SNP	5.9e-09	0.0499	XLOC_011651	2RHet	861402	861402	862533	4.64e-08	0.0177	DOC4_DM
2L_22683972_SNP	5.9e-09	0.0499	XLOC_011651	2RHet	861402	861402	862533	7.86e-18	0.0205	S2_DM
2L_22683972_SNP	4.92e-07	0.05	XLOC_011704	2RHet	1921599	1921599	1923490	7.86e-18	0.0205	S2_DM
2L_22683972_SNP	4.92e-07	0.05	XLOC_011704	2RHet	1921599	1921599	1923490	4.64e-08	0.0177	DOC4_DM
2L_22683972_SNP	1.7e-08	0.0489	XLOC_011853	2RHet	624599	623448	624599	4.64e-08	0.0177	DOC4_DM
2L_22683972_SNP	1.7e-08	0.0489	XLOC_011853	2RHet	624599	623448	624599	7.86e-18	0.0205	S2_DM
2L_22684518_SNP	1.86e-09	0.0202	FBgn0040009	2L	22430400	22430400	22441183	4.69e-18	0.0205	S2_DM
2L_22684518_SNP	1.86e-09	0.0202	FBgn0040009	2L	22430400	22430400	22441183	1.68e-08	0.0177	DOC4_DM
2L_22684518_SNP	5.22e-10	0.0244	FBgn0262887	2L	22961737	22961737	22963456	1.68e-08	0.0177	DOC4_DM
2L_22684518_SNP	5.22e-10	0.0244	FBgn0262887	2L	22961737	22961737	22963456	4.69e-18	0.0205	S2_DM
2L_22684518_SNP	4.12e-08	0.0498	XLOC_003055	2L	22739320	22739320	22739796	4.69e-18	0.0205	S2_DM
2L_22684518_SNP	4.12e-08	0.0498	XLOC_003055	2L	22739320	22739320	22739796	1.68e-08	0.0177	DOC4_DM
2L_22684518_SNP	6.55e-07	0.0493	XLOC_006087	2L	22736356	22705670	22736356	1.68e-08	0.0177	DOC4_DM
2L_22684518_SNP	6.55e-07	0.0493	XLOC_006087	2L	22736356	22705670	22736356	4.69e-18	0.0205	S2_DM
2L_22684518_SNP	6.05e-06	0.0484	XLOC_006268	2R	21910	21910	24748	1.68e-08	0.0177	DOC4_DM
2L_22684518_SNP	6.05e-06	0.0484	XLOC_006268	2R	21910	21910	24748	4.69e-18	0.0205	S2_DM
2L_22684518_SNP	4.42e-09	0.0499	XLOC_011651	2RHet	861402	861402	862533	1.68e-08	0.0177	DOC4_DM
2L_22684518_SNP	4.42e-09	0.0499	XLOC_011651	2RHet	861402	861402	862533	4.69e-18	0.0205	S2_DM
2L_22684518_SNP	4.03e-06	0.05	XLOC_011704	2RHet	1921599	1921599	1923490	4.69e-18	0.0205	S2_DM
2L_22684518_SNP	4.03e-06	0.05	XLOC_011704	2RHet	1921599	1921599	1923490	1.68e-08	0.0177	DOC4_DM
2L_22684518_SNP	4.5e-08	0.0489	XLOC_011853	2RHet	624599	623448	624599	4.69e-18	0.0205	S2_DM
2L_22684518_SNP	4.5e-08	0.0489	XLOC_011853	2RHet	624599	623448	624599	1.68e-08	0.0177	DOC4_DM
2L_22684629_SNP	2.55e-09	0.0202	FBgn0040009	2L	22430400	22430400	22441183	2.49e-18	0.0205	S2_DM
2L_22684629_SNP	2.55e-09	0.0202	FBgn0040009	2L	22430400	22430400	22441183	6.27e-08	0.0177	DOC4_DM
2L_22684629_SNP	5.12e-10	0.0244	FBgn0262887	2L	22961737	22961737	22963456	6.27e-08	0.0177	DOC4_DM
2L_22684629_SNP	5.12e-10	0.0244	FBgn0262887	2L	22961737	22961737	22963456	2.49e-18	0.0205	S2_DM
2L_22684629_SNP	2.11e-08	0.0498	XLOC_003055	2L	22739320	22739320	22739796	2.49e-18	0.0205	S2_DM
2L_22684629_SNP	2.11e-08	0.0498	XLOC_003055	2L	22739320	22739320	22739796	6.27e-08	0.0177	DOC4_DM
2L_22684629_SNP	1.14e-07	0.0493	XLOC_006087	2L	22736356	22705670	22736356	6.27e-08	0.0177	DOC4_DM
2L_22684629_SNP	1.14e-07	0.0493	XLOC_006087	2L	22736356	22705670	22736356	2.49e-18	0.0205	S2_DM
2L_22684629_SNP	4.28e-06	0.0484	XLOC_006268	2R	21910	21910	24748	6.27e-08	0.0177	DOC4_DM
2L_22684629_SNP	4.28e-06	0.0484	XLOC_006268	2R	21910	21910	24748	2.49e-18	0.0205	S2_DM
2L_22684629_SNP	3.27e-09	0.0499	XLOC_011651	2RHet	861402	861402	862533	2.49e-18	0.0205	S2_DM
2L_22684629_SNP	3.27e-09	0.0499	XLOC_011651	2RHet	861402	861402	862533	6.27e-08	0.0177	DOC4_DM
2L_22684629_SNP	1.12e-06	0.05	XLOC_011704	2RHet	1921599	1921599	1923490	2.49e-18	0.0205	S2_DM
2L_22684629_SNP	1.12e-06	0.05	XLOC_011704	2RHet	1921599	1921599	1923490	6.27e-08	0.0177	DOC4_DM
2L_22684629_SNP	4.68e-08	0.0489	XLOC_011853	2RHet	624599	623448	624599	6.27e-08	0.0177	DOC4_DM
2L_22684629_SNP	4.68e-08	0.0489	XLOC_011853	2RHet	624599	623448	624599	2.49e-18	0.0205	S2_DM
2L_22684877_SNP	9.28e-08	0.0202	FBgn0040009	2L	22430400	22430400	22441183	6.31e-18	0.0205	S2_DM
2L_22684877_SNP	9.28e-08	0.0202	FBgn0040009	2L	22430400	22430400	22441183	2.09e-08	0.0177	DOC4_DM
2L_22684877_SNP	2.07e-09	0.0244	FBgn0262887	2L	22961737	22961737	22963456	2.09e-08	0.0177	DOC4_DM
2L_22684877_SNP	2.07e-09	0.0244	FBgn0262887	2L	22961737	22961737	22963456	6.31e-18	0.0205	S2_DM
2L_22684877_SNP	1.33e-07	0.0498	XLOC_003055	2L	22739320	22739320	22739796	6.31e-18	0.0205	S2_DM
2L_22684877_SNP	1.33e-07	0.0498	XLOC_003055	2L	22739320	22739320	22739796	2.09e-08	0.0177	DOC4_DM
2L_22684877_SNP	5.48e-07	0.0493	XLOC_006087	2L	22736356	22705670	22736356	6.31e-18	0.0205	S2_DM
2L_22684877_SNP	5.48e-07	0.0493	XLOC_006087	2L	22736356	22705670	22736356	2.09e-08	0.0177	DOC4_DM
2L_22684877_SNP	2.41e-06	0.0484	XLOC_006268	2R	21910	21910	24748	2.09e-08	0.0177	DOC4_DM
2L_22684877_SNP	2.41e-06	0.0484	XLOC_006268	2R	21910	21910	24748	6.31e-18	0.0205	S2_DM
2L_22684877_SNP	3.18e-08	0.0499	XLOC_011651	2RHet	861402	861402	862533	2.09e-08	0.0177	DOC4_DM
2L_22684877_SNP	3.18e-08	0.0499	XLOC_011651	2RHet	861402	861402	862533	6.31e-18	0.0205	S2_DM
2L_22684877_SNP	4.8e-06	0.05	XLOC_011704	2RHet	1921599	1921599	1923490	2.09e-08	0.0177	DOC4_DM
2L_22684877_SNP	4.8e-06	0.05	XLOC_011704	2RHet	1921599	1921599	1923490	6.31e-18	0.0205	S2_DM
2L_22684877_SNP	3.45e-08	0.0489	XLOC_011853	2RHet	624599	623448	624599	6.31e-18	0.0205	S2_DM
2L_22684877_SNP	3.45e-08	0.0489	XLOC_011853	2RHet	624599	623448	624599	2.09e-08	0.0177	DOC4_DM
2L_22684933_SNP	2.06e-06	0.0202	FBgn0040009	2L	22430400	22430400	22441183	3.89e-09	0.0205	S2_DM
2L_22684933_SNP	4.42e-08	0.0482	FBgn0085732	2RHet	337700	337700	340299	3.89e-09	0.0205	S2_DM
2L_22684933_SNP	7.75e-11	0.0498	XLOC_003055	2L	22739320	22739320	22739796	3.89e-09	0.0205	S2_DM
2L_22684933_SNP	1.58e-08	0.0499	XLOC_011651	2RHet	861402	861402	862533	3.89e-09	0.0205	S2_DM
2L_22684934_SNP	7.93e-07	0.0202	FBgn0040009	2L	22430400	22430400	22441183	1.88e-09	0.0205	S2_DM
2L_22684934_SNP	4.68e-08	0.0482	FBgn0085732	2RHet	337700	337700	340299	1.88e-09	0.0205	S2_DM
2L_22684934_SNP	4.11e-11	0.0498	XLOC_003055	2L	22739320	22739320	22739796	1.88e-09	0.0205	S2_DM
2L_22684934_SNP	9.14e-09	0.0499	XLOC_011651	2RHet	861402	861402	862533	1.88e-09	0.0205	S2_DM
2L_22685066_SNP	7.92e-09	0.0202	FBgn0040009	2L	22430400	22430400	22441183	7.33e-18	0.0205	S2_DM
2L_22685066_SNP	7.92e-09	0.0202	FBgn0040009	2L	22430400	22430400	22441183	8.13e-08	0.0177	DOC4_DM
2L_22685066_SNP	1.24e-10	0.0244	FBgn0262887	2L	22961737	22961737	22963456	8.13e-08	0.0177	DOC4_DM
2L_22685066_SNP	1.24e-10	0.0244	FBgn0262887	2L	22961737	22961737	22963456	7.33e-18	0.0205	S2_DM
2L_22685066_SNP	5.53e-08	0.0498	XLOC_003055	2L	22739320	22739320	22739796	8.13e-08	0.0177	DOC4_DM
2L_22685066_SNP	5.53e-08	0.0498	XLOC_003055	2L	22739320	22739320	22739796	7.33e-18	0.0205	S2_DM
2L_22685066_SNP	4.12e-07	0.0493	XLOC_006087	2L	22736356	22705670	22736356	8.13e-08	0.0177	DOC4_DM
2L_22685066_SNP	4.12e-07	0.0493	XLOC_006087	2L	22736356	22705670	22736356	7.33e-18	0.0205	S2_DM
2L_22685066_SNP	4.36e-06	0.0484	XLOC_006268	2R	21910	21910	24748	8.13e-08	0.0177	DOC4_DM
2L_22685066_SNP	4.36e-06	0.0484	XLOC_006268	2R	21910	21910	24748	7.33e-18	0.0205	S2_DM
2L_22685066_SNP	4.02e-09	0.0499	XLOC_011651	2RHet	861402	861402	862533	7.33e-18	0.0205	S2_DM
2L_22685066_SNP	4.02e-09	0.0499	XLOC_011651	2RHet	861402	861402	862533	8.13e-08	0.0177	DOC4_DM
2L_22685066_SNP	5.14e-06	0.05	XLOC_011704	2RHet	1921599	1921599	1923490	8.13e-08	0.0177	DOC4_DM
2L_22685066_SNP	5.14e-06	0.05	XLOC_011704	2RHet	1921599	1921599	1923490	7.33e-18	0.0205	S2_DM
2L_22685066_SNP	1.33e-08	0.0489	XLOC_011853	2RHet	624599	623448	624599	7.33e-18	0.0205	S2_DM
2L_22685066_SNP	1.33e-08	0.0489	XLOC_011853	2RHet	624599	623448	624599	8.13e-08	0.0177	DOC4_DM
2L_22685067_SNP	1.68e-09	0.0202	FBgn0040009	2L	22430400	22430400	22441183	5.51e-19	0.0205	S2_DM
2L_22685067_SNP	1.68e-09	0.0202	FBgn0040009	2L	22430400	22430400	22441183	1.66e-08	0.0177	DOC4_DM
2L_22685067_SNP	4.13e-10	0.0244	FBgn0262887	2L	22961737	22961737	22963456	5.51e-19	0.0205	S2_DM
2L_22685067_SNP	4.13e-10	0.0244	FBgn0262887	2L	22961737	22961737	22963456	1.66e-08	0.0177	DOC4_DM
2L_22685067_SNP	4.87e-08	0.0498	XLOC_003055	2L	22739320	22739320	22739796	1.66e-08	0.0177	DOC4_DM
2L_22685067_SNP	4.87e-08	0.0498	XLOC_003055	2L	22739320	22739320	22739796	5.51e-19	0.0205	S2_DM
2L_22685067_SNP	4.88e-07	0.0493	XLOC_006087	2L	22736356	22705670	22736356	1.66e-08	0.0177	DOC4_DM
2L_22685067_SNP	4.88e-07	0.0493	XLOC_006087	2L	22736356	22705670	22736356	5.51e-19	0.0205	S2_DM
2L_22685067_SNP	1.02e-08	0.0499	XLOC_011651	2RHet	861402	861402	862533	5.51e-19	0.0205	S2_DM
2L_22685067_SNP	1.02e-08	0.0499	XLOC_011651	2RHet	861402	861402	862533	1.66e-08	0.0177	DOC4_DM
2L_22685067_SNP	2.48e-06	0.05	XLOC_011704	2RHet	1921599	1921599	1923490	1.66e-08	0.0177	DOC4_DM
2L_22685067_SNP	2.48e-06	0.05	XLOC_011704	2RHet	1921599	1921599	1923490	5.51e-19	0.0205	S2_DM
2L_22685067_SNP	7.62e-08	0.0489	XLOC_011853	2RHet	624599	623448	624599	1.66e-08	0.0177	DOC4_DM
2L_22685067_SNP	7.62e-08	0.0489	XLOC_011853	2RHet	624599	623448	624599	5.51e-19	0.0205	S2_DM
2L_22685098_SNP	3.15e-07	0.0202	FBgn0040009	2L	22430400	22430400	22441183	1.4e-09	0.0205	S2_DM
2L_22685098_SNP	2.1e-08	0.0482	FBgn0085732	2RHet	337700	337700	340299	1.4e-09	0.0205	S2_DM
2L_22685098_SNP	7.95e-11	0.0498	XLOC_003055	2L	22739320	22739320	22739796	1.4e-09	0.0205	S2_DM
2L_22685098_SNP	2.7e-08	0.0499	XLOC_011651	2RHet	861402	861402	862533	1.4e-09	0.0205	S2_DM
2L_22685732_SNP	4.8e-09	0.0482	FBgn0085732	2RHet	337700	337700	340299	7.02e-07	0.0177	DOC4_DM
2L_22685732_SNP	4.8e-09	0.0482	FBgn0085732	2RHet	337700	337700	340299	3.82e-07	0.0205	S2_DM
2L_22685732_SNP	1.85e-10	0.0498	XLOC_003055	2L	22739320	22739320	22739796	7.02e-07	0.0177	DOC4_DM
2L_22685732_SNP	1.85e-10	0.0498	XLOC_003055	2L	22739320	22739320	22739796	3.82e-07	0.0205	S2_DM
2L_22685732_SNP	1.07e-11	0.0499	XLOC_011651	2RHet	861402	861402	862533	3.82e-07	0.0205	S2_DM
2L_22685732_SNP	1.07e-11	0.0499	XLOC_011651	2RHet	861402	861402	862533	7.02e-07	0.0177	DOC4_DM
2L_22685732_SNP	2.01e-07	0.0489	XLOC_011853	2RHet	624599	623448	624599	7.02e-07	0.0177	DOC4_DM
2L_22685732_SNP	2.01e-07	0.0489	XLOC_011853	2RHet	624599	623448	624599	3.82e-07	0.0205	S2_DM
2L_22685732_SNP	3.24e-07	0.0329	XLOC_011942	2RHet	1262608	1258487	1262608	7.02e-07	0.0177	DOC4_DM
2L_22685732_SNP	3.24e-07	0.0329	XLOC_011942	2RHet	1262608	1258487	1262608	3.82e-07	0.0205	S2_DM
2L_22685775_SNP	4.16e-08	0.0482	FBgn0085732	2RHet	337700	337700	340299	5.6e-07	0.0177	DOC4_DM
2L_22685775_SNP	4.16e-08	0.0482	FBgn0085732	2RHet	337700	337700	340299	2.85e-07	0.0205	S2_DM
2L_22685775_SNP	5.85e-11	0.0498	XLOC_003055	2L	22739320	22739320	22739796	2.85e-07	0.0205	S2_DM
2L_22685775_SNP	5.85e-11	0.0498	XLOC_003055	2L	22739320	22739320	22739796	5.6e-07	0.0177	DOC4_DM
2L_22685775_SNP	7.01e-11	0.0499	XLOC_011651	2RHet	861402	861402	862533	5.6e-07	0.0177	DOC4_DM
2L_22685775_SNP	7.01e-11	0.0499	XLOC_011651	2RHet	861402	861402	862533	2.85e-07	0.0205	S2_DM
2L_22685775_SNP	4.47e-07	0.0489	XLOC_011853	2RHet	624599	623448	624599	2.85e-07	0.0205	S2_DM
2L_22685775_SNP	4.47e-07	0.0489	XLOC_011853	2RHet	624599	623448	624599	5.6e-07	0.0177	DOC4_DM
2L_22685775_SNP	3.19e-07	0.0329	XLOC_011942	2RHet	1262608	1258487	1262608	2.85e-07	0.0205	S2_DM
2L_22685775_SNP	3.19e-07	0.0329	XLOC_011942	2RHet	1262608	1258487	1262608	5.6e-07	0.0177	DOC4_DM
2L_22685791_SNP	2.87e-08	0.0482	FBgn0085732	2RHet	337700	337700	340299	2.24e-06	0.0177	DOC4_DM
2L_22685791_SNP	2.87e-08	0.0482	FBgn0085732	2RHet	337700	337700	340299	5.23e-08	0.0205	S2_DM
2L_22685791_SNP	2.15e-10	0.0498	XLOC_003055	2L	22739320	22739320	22739796	2.24e-06	0.0177	DOC4_DM
2L_22685791_SNP	2.15e-10	0.0498	XLOC_003055	2L	22739320	22739320	22739796	5.23e-08	0.0205	S2_DM
2L_22685791_SNP	1.17e-11	0.0499	XLOC_011651	2RHet	861402	861402	862533	5.23e-08	0.0205	S2_DM
2L_22685791_SNP	1.17e-11	0.0499	XLOC_011651	2RHet	861402	861402	862533	2.24e-06	0.0177	DOC4_DM
2L_22685791_SNP	2.49e-07	0.0489	XLOC_011853	2RHet	624599	623448	624599	5.23e-08	0.0205	S2_DM
2L_22685791_SNP	2.49e-07	0.0489	XLOC_011853	2RHet	624599	623448	624599	2.24e-06	0.0177	DOC4_DM
2L_22685791_SNP	4.9e-07	0.0329	XLOC_011942	2RHet	1262608	1258487	1262608	2.24e-06	0.0177	DOC4_DM
2L_22685791_SNP	4.9e-07	0.0329	XLOC_011942	2RHet	1262608	1258487	1262608	5.23e-08	0.0205	S2_DM
2L_22685900_SNP	3.72e-09	0.0202	FBgn0040009	2L	22430400	22430400	22441183	5.48e-18	0.0205	S2_DM
2L_22685900_SNP	3.72e-09	0.0202	FBgn0040009	2L	22430400	22430400	22441183	1.33e-07	0.0177	DOC4_DM
2L_22685900_SNP	1.9e-09	0.0244	FBgn0262887	2L	22961737	22961737	22963456	1.33e-07	0.0177	DOC4_DM
2L_22685900_SNP	1.9e-09	0.0244	FBgn0262887	2L	22961737	22961737	22963456	5.48e-18	0.0205	S2_DM
2L_22685900_SNP	9.91e-08	0.0498	XLOC_003055	2L	22739320	22739320	22739796	1.33e-07	0.0177	DOC4_DM
2L_22685900_SNP	9.91e-08	0.0498	XLOC_003055	2L	22739320	22739320	22739796	5.48e-18	0.0205	S2_DM
2L_22685900_SNP	2.41e-07	0.0493	XLOC_006087	2L	22736356	22705670	22736356	1.33e-07	0.0177	DOC4_DM
2L_22685900_SNP	2.41e-07	0.0493	XLOC_006087	2L	22736356	22705670	22736356	5.48e-18	0.0205	S2_DM
2L_22685900_SNP	5.58e-09	0.0499	XLOC_011651	2RHet	861402	861402	862533	5.48e-18	0.0205	S2_DM
2L_22685900_SNP	5.58e-09	0.0499	XLOC_011651	2RHet	861402	861402	862533	1.33e-07	0.0177	DOC4_DM
2L_22685900_SNP	3.68e-06	0.05	XLOC_011704	2RHet	1921599	1921599	1923490	1.33e-07	0.0177	DOC4_DM
2L_22685900_SNP	3.68e-06	0.05	XLOC_011704	2RHet	1921599	1921599	1923490	5.48e-18	0.0205	S2_DM
2L_22685900_SNP	1.86e-07	0.0489	XLOC_011853	2RHet	624599	623448	624599	1.33e-07	0.0177	DOC4_DM
2L_22685900_SNP	1.86e-07	0.0489	XLOC_011853	2RHet	624599	623448	624599	5.48e-18	0.0205	S2_DM
2L_22686115_SNP	3.79e-07	0.0244	FBgn0262887	2L	22961737	22961737	22963456	2.47e-09	0.0205	S2_DM
2L_22686253_SNP	8.19e-07	0.0202	FBgn0040009	2L	22430400	22430400	22441183	1.65e-09	0.0205	S2_DM
2L_22686253_SNP	7.32e-08	0.0482	FBgn0085732	2RHet	337700	337700	340299	1.65e-09	0.0205	S2_DM
2L_22686253_SNP	2.65e-11	0.0498	XLOC_003055	2L	22739320	22739320	22739796	1.65e-09	0.0205	S2_DM
2L_22686253_SNP	3.83e-08	0.0499	XLOC_011651	2RHet	861402	861402	862533	1.65e-09	0.0205	S2_DM
2L_22686281_SNP	8.82e-08	0.0202	FBgn0040009	2L	22430400	22430400	22441183	6.96e-08	0.0177	DOC4_DM
2L_22686281_SNP	8.82e-08	0.0202	FBgn0040009	2L	22430400	22430400	22441183	4.17e-16	0.0205	S2_DM
2L_22686281_SNP	1.76e-08	0.0244	FBgn0262887	2L	22961737	22961737	22963456	6.96e-08	0.0177	DOC4_DM
2L_22686281_SNP	1.76e-08	0.0244	FBgn0262887	2L	22961737	22961737	22963456	4.17e-16	0.0205	S2_DM
2L_22686281_SNP	7.39e-08	0.0498	XLOC_003055	2L	22739320	22739320	22739796	6.96e-08	0.0177	DOC4_DM
2L_22686281_SNP	7.39e-08	0.0498	XLOC_003055	2L	22739320	22739320	22739796	4.17e-16	0.0205	S2_DM
2L_22686281_SNP	1.71e-07	0.0484	XLOC_006268	2R	21910	21910	24748	6.96e-08	0.0177	DOC4_DM
2L_22686281_SNP	1.71e-07	0.0484	XLOC_006268	2R	21910	21910	24748	4.17e-16	0.0205	S2_DM
2L_22686281_SNP	8.66e-10	0.0499	XLOC_011651	2RHet	861402	861402	862533	6.96e-08	0.0177	DOC4_DM
2L_22686281_SNP	8.66e-10	0.0499	XLOC_011651	2RHet	861402	861402	862533	4.17e-16	0.0205	S2_DM
2L_22686281_SNP	1.44e-08	0.0489	XLOC_011853	2RHet	624599	623448	624599	6.96e-08	0.0177	DOC4_DM
2L_22686281_SNP	1.44e-08	0.0489	XLOC_011853	2RHet	624599	623448	624599	4.17e-16	0.0205	S2_DM
2L_22686281_SNP	5.55e-06	0.0329	XLOC_011942	2RHet	1262608	1258487	1262608	4.17e-16	0.0205	S2_DM
2L_22686281_SNP	5.55e-06	0.0329	XLOC_011942	2RHet	1262608	1258487	1262608	6.96e-08	0.0177	DOC4_DM
2L_22686423_SNP	8.86e-09	0.0202	FBgn0040009	2L	22430400	22430400	22441183	3.01e-17	0.0205	S2_DM
2L_22686423_SNP	8.86e-09	0.0202	FBgn0040009	2L	22430400	22430400	22441183	8.53e-08	0.0177	DOC4_DM
2L_22686423_SNP	2.69e-09	0.0244	FBgn0262887	2L	22961737	22961737	22963456	8.53e-08	0.0177	DOC4_DM
2L_22686423_SNP	2.69e-09	0.0244	FBgn0262887	2L	22961737	22961737	22963456	3.01e-17	0.0205	S2_DM
2L_22686423_SNP	3.99e-08	0.0498	XLOC_003055	2L	22739320	22739320	22739796	8.53e-08	0.0177	DOC4_DM
2L_22686423_SNP	3.99e-08	0.0498	XLOC_003055	2L	22739320	22739320	22739796	3.01e-17	0.0205	S2_DM
2L_22686423_SNP	6.83e-07	0.0493	XLOC_006087	2L	22736356	22705670	22736356	8.53e-08	0.0177	DOC4_DM
2L_22686423_SNP	6.83e-07	0.0493	XLOC_006087	2L	22736356	22705670	22736356	3.01e-17	0.0205	S2_DM
2L_22686423_SNP	3.28e-06	0.0484	XLOC_006268	2R	21910	21910	24748	8.53e-08	0.0177	DOC4_DM
2L_22686423_SNP	3.28e-06	0.0484	XLOC_006268	2R	21910	21910	24748	3.01e-17	0.0205	S2_DM
2L_22686423_SNP	6.13e-09	0.0499	XLOC_011651	2RHet	861402	861402	862533	8.53e-08	0.0177	DOC4_DM
2L_22686423_SNP	6.13e-09	0.0499	XLOC_011651	2RHet	861402	861402	862533	3.01e-17	0.0205	S2_DM
2L_22686423_SNP	1.78e-07	0.0489	XLOC_011853	2RHet	624599	623448	624599	3.01e-17	0.0205	S2_DM
2L_22686423_SNP	1.78e-07	0.0489	XLOC_011853	2RHet	624599	623448	624599	8.53e-08	0.0177	DOC4_DM
2L_22686456_SNP	2.25e-08	0.0202	FBgn0040009	2L	22430400	22430400	22441183	1.31e-08	0.0177	DOC4_DM
2L_22686456_SNP	2.25e-08	0.0202	FBgn0040009	2L	22430400	22430400	22441183	1.02e-12	0.0205	S2_DM
2L_22686456_SNP	1.82e-07	0.0244	FBgn0262887	2L	22961737	22961737	22963456	1.31e-08	0.0177	DOC4_DM
2L_22686456_SNP	1.82e-07	0.0244	FBgn0262887	2L	22961737	22961737	22963456	1.02e-12	0.0205	S2_DM
2L_22686456_SNP	1.46e-06	0.0499	XLOC_011651	2RHet	861402	861402	862533	1.02e-12	0.0205	S2_DM
2L_22686456_SNP	1.46e-06	0.0499	XLOC_011651	2RHet	861402	861402	862533	1.31e-08	0.0177	DOC4_DM
2L_22686456_SNP	3.24e-07	0.05	XLOC_011704	2RHet	1921599	1921599	1923490	1.02e-12	0.0205	S2_DM
2L_22686456_SNP	3.24e-07	0.05	XLOC_011704	2RHet	1921599	1921599	1923490	1.31e-08	0.0177	DOC4_DM
2L_22686456_SNP	5.15e-08	0.0489	XLOC_011853	2RHet	624599	623448	624599	1.31e-08	0.0177	DOC4_DM
2L_22686456_SNP	5.15e-08	0.0489	XLOC_011853	2RHet	624599	623448	624599	1.02e-12	0.0205	S2_DM
2L_22686456_SNP	1.08e-06	0.0488	XLOC_012081	2RHet	3151739	3149849	3151739	1.02e-12	0.0205	S2_DM
2L_22686456_SNP	1.08e-06	0.0488	XLOC_012081	2RHet	3151739	3149849	3151739	1.31e-08	0.0177	DOC4_DM
2L_22686969_SNP	1.1e-08	0.0484	XLOC_006268	2R	21910	21910	24748	7.16e-09	0.0205	S2_DM
2L_22686969_SNP	1.1e-08	0.0484	XLOC_006268	2R	21910	21910	24748	3.59e-08	0.0177	DOC4_DM
2L_22686969_SNP	2.29e-09	0.0499	XLOC_011651	2RHet	861402	861402	862533	3.59e-08	0.0177	DOC4_DM
2L_22686969_SNP	2.29e-09	0.0499	XLOC_011651	2RHet	861402	861402	862533	7.16e-09	0.0205	S2_DM
2L_22686969_SNP	1.37e-07	0.0489	XLOC_011853	2RHet	624599	623448	624599	3.59e-08	0.0177	DOC4_DM
2L_22686969_SNP	1.37e-07	0.0489	XLOC_011853	2RHet	624599	623448	624599	7.16e-09	0.0205	S2_DM
2L_22686969_SNP	4.97e-07	0.0329	XLOC_011942	2RHet	1262608	1258487	1262608	7.16e-09	0.0205	S2_DM
2L_22686969_SNP	4.97e-07	0.0329	XLOC_011942	2RHet	1262608	1258487	1262608	3.59e-08	0.0177	DOC4_DM
2L_22687129_SNP	2.43e-07	0.0499	XLOC_011651	2RHet	861402	861402	862533	9.48e-07	0.0205	S2_DM
2L_22687132_SNP	1.34e-07	0.0499	XLOC_011651	2RHet	861402	861402	862533	2.29e-06	0.0205	S2_DM
2L_22687144_SNP	5.47e-06	0.0484	XLOC_006268	2R	21910	21910	24748	8.52e-08	0.0205	S2_DM
2L_22687144_SNP	5.47e-06	0.0484	XLOC_006268	2R	21910	21910	24748	2.31e-06	0.0177	DOC4_DM
2L_22687625_SNP	6.29e-07	0.0202	FBgn0040009	2L	22430400	22430400	22441183	5.19e-18	0.0205	S2_DM
2L_22687625_SNP	9.23e-10	0.0244	FBgn0262887	2L	22961737	22961737	22963456	5.19e-18	0.0205	S2_DM
2L_22687625_SNP	1.29e-08	0.0498	XLOC_003055	2L	22739320	22739320	22739796	5.19e-18	0.0205	S2_DM
2L_22687625_SNP	1.02e-08	0.0493	XLOC_006087	2L	22736356	22705670	22736356	5.19e-18	0.0205	S2_DM
2L_22687625_SNP	1.7e-06	0.0499	XLOC_011651	2RHet	861402	861402	862533	5.19e-18	0.0205	S2_DM
2L_22687857_DEL	6.84e-07	0.0484	XLOC_006268	2R	21910	21910	24748	9e-14	0.0205	S2_DM
2L_22687857_DEL	6.84e-07	0.0484	XLOC_006268	2R	21910	21910	24748	6.05e-06	0.0177	DOC4_DM
2L_22687857_DEL	3.33e-07	0.0499	XLOC_011651	2RHet	861402	861402	862533	6.05e-06	0.0177	DOC4_DM
2L_22687857_DEL	3.33e-07	0.0499	XLOC_011651	2RHet	861402	861402	862533	9e-14	0.0205	S2_DM
2L_22687890_SNP	3.08e-07	0.0484	XLOC_006268	2R	21910	21910	24748	3.68e-06	0.0177	DOC4_DM
2L_22687890_SNP	3.08e-07	0.0484	XLOC_006268	2R	21910	21910	24748	3.16e-14	0.0205	S2_DM
2L_22687890_SNP	8.89e-08	0.0499	XLOC_011651	2RHet	861402	861402	862533	3.16e-14	0.0205	S2_DM
2L_22687890_SNP	8.89e-08	0.0499	XLOC_011651	2RHet	861402	861402	862533	3.68e-06	0.0177	DOC4_DM
2L_22687890_SNP	7.68e-07	0.0489	XLOC_011853	2RHet	624599	623448	624599	3.68e-06	0.0177	DOC4_DM
2L_22687890_SNP	7.68e-07	0.0489	XLOC_011853	2RHet	624599	623448	624599	3.16e-14	0.0205	S2_DM
2L_22688100_SNP	6.26e-10	0.0202	FBgn0040009	2L	22430400	22430400	22441183	2.34e-08	0.0177	DOC4_DM
2L_22688100_SNP	6.26e-10	0.0202	FBgn0040009	2L	22430400	22430400	22441183	1.5e-18	0.0205	S2_DM
2L_22688100_SNP	2.34e-10	0.0244	FBgn0262887	2L	22961737	22961737	22963456	1.5e-18	0.0205	S2_DM
2L_22688100_SNP	2.34e-10	0.0244	FBgn0262887	2L	22961737	22961737	22963456	2.34e-08	0.0177	DOC4_DM
2L_22688100_SNP	1.34e-08	0.0498	XLOC_003055	2L	22739320	22739320	22739796	1.5e-18	0.0205	S2_DM
2L_22688100_SNP	1.34e-08	0.0498	XLOC_003055	2L	22739320	22739320	22739796	2.34e-08	0.0177	DOC4_DM
2L_22688100_SNP	8.72e-08	0.0493	XLOC_006087	2L	22736356	22705670	22736356	2.34e-08	0.0177	DOC4_DM
2L_22688100_SNP	8.72e-08	0.0493	XLOC_006087	2L	22736356	22705670	22736356	1.5e-18	0.0205	S2_DM
2L_22688100_SNP	5.22e-06	0.0484	XLOC_006268	2R	21910	21910	24748	2.34e-08	0.0177	DOC4_DM
2L_22688100_SNP	5.22e-06	0.0484	XLOC_006268	2R	21910	21910	24748	1.5e-18	0.0205	S2_DM
2L_22688100_SNP	3.03e-09	0.0499	XLOC_011651	2RHet	861402	861402	862533	2.34e-08	0.0177	DOC4_DM
2L_22688100_SNP	3.03e-09	0.0499	XLOC_011651	2RHet	861402	861402	862533	1.5e-18	0.0205	S2_DM
2L_22688100_SNP	5.69e-07	0.05	XLOC_011704	2RHet	1921599	1921599	1923490	2.34e-08	0.0177	DOC4_DM
2L_22688100_SNP	5.69e-07	0.05	XLOC_011704	2RHet	1921599	1921599	1923490	1.5e-18	0.0205	S2_DM
2L_22688100_SNP	1.56e-08	0.0489	XLOC_011853	2RHet	624599	623448	624599	2.34e-08	0.0177	DOC4_DM
2L_22688100_SNP	1.56e-08	0.0489	XLOC_011853	2RHet	624599	623448	624599	1.5e-18	0.0205	S2_DM
2L_22688117_SNP	5.9e-10	0.0202	FBgn0040009	2L	22430400	22430400	22441183	5.5e-09	0.0177	DOC4_DM
2L_22688117_SNP	5.9e-10	0.0202	FBgn0040009	2L	22430400	22430400	22441183	2.91e-18	0.0205	S2_DM
2L_22688117_SNP	5e-10	0.0244	FBgn0262887	2L	22961737	22961737	22963456	2.91e-18	0.0205	S2_DM
2L_22688117_SNP	5e-10	0.0244	FBgn0262887	2L	22961737	22961737	22963456	5.5e-09	0.0177	DOC4_DM
2L_22688117_SNP	2.03e-08	0.0498	XLOC_003055	2L	22739320	22739320	22739796	2.91e-18	0.0205	S2_DM
2L_22688117_SNP	2.03e-08	0.0498	XLOC_003055	2L	22739320	22739320	22739796	5.5e-09	0.0177	DOC4_DM
2L_22688117_SNP	1.76e-07	0.0493	XLOC_006087	2L	22736356	22705670	22736356	2.91e-18	0.0205	S2_DM
2L_22688117_SNP	1.76e-07	0.0493	XLOC_006087	2L	22736356	22705670	22736356	5.5e-09	0.0177	DOC4_DM
2L_22688117_SNP	7.36e-06	0.0484	XLOC_006268	2R	21910	21910	24748	5.5e-09	0.0177	DOC4_DM
2L_22688117_SNP	7.36e-06	0.0484	XLOC_006268	2R	21910	21910	24748	2.91e-18	0.0205	S2_DM
2L_22688117_SNP	5.85e-09	0.0499	XLOC_011651	2RHet	861402	861402	862533	2.91e-18	0.0205	S2_DM
2L_22688117_SNP	5.85e-09	0.0499	XLOC_011651	2RHet	861402	861402	862533	5.5e-09	0.0177	DOC4_DM
2L_22688117_SNP	4.13e-07	0.05	XLOC_011704	2RHet	1921599	1921599	1923490	5.5e-09	0.0177	DOC4_DM
2L_22688117_SNP	4.13e-07	0.05	XLOC_011704	2RHet	1921599	1921599	1923490	2.91e-18	0.0205	S2_DM
2L_22688117_SNP	1.9e-08	0.0489	XLOC_011853	2RHet	624599	623448	624599	2.91e-18	0.0205	S2_DM
2L_22688117_SNP	1.9e-08	0.0489	XLOC_011853	2RHet	624599	623448	624599	5.5e-09	0.0177	DOC4_DM
2L_22688120_SNP	2.01e-07	0.0202	FBgn0040009	2L	22430400	22430400	22441183	1.59e-11	0.0205	S2_DM
2L_22688120_SNP	2.01e-07	0.0202	FBgn0040009	2L	22430400	22430400	22441183	8.56e-06	0.0177	DOC4_DM
2L_22688120_SNP	7.11e-06	0.0244	FBgn0262887	2L	22961737	22961737	22963456	8.56e-06	0.0177	DOC4_DM
2L_22688120_SNP	7.11e-06	0.0244	FBgn0262887	2L	22961737	22961737	22963456	1.59e-11	0.0205	S2_DM
2L_22688120_SNP	4.05e-06	0.05	XLOC_011704	2RHet	1921599	1921599	1923490	1.59e-11	0.0205	S2_DM
2L_22688120_SNP	4.05e-06	0.05	XLOC_011704	2RHet	1921599	1921599	1923490	8.56e-06	0.0177	DOC4_DM
2L_22688122_SNP	6.44e-07	0.0202	FBgn0040009	2L	22430400	22430400	22441183	3.18e-10	0.0205	S2_DM
2L_22688123_SNP	2.69e-07	0.0202	FBgn0040009	2L	22430400	22430400	22441183	6.2e-11	0.0205	S2_DM
2L_22688125_SNP	2.19e-06	0.0202	FBgn0040009	2L	22430400	22430400	22441183	1.24e-10	0.0205	S2_DM
2L_22688125_SNP	6.6e-06	0.0244	FBgn0262887	2L	22961737	22961737	22963456	1.24e-10	0.0205	S2_DM
2L_22688126_SNP	7.56e-06	0.0202	FBgn0040009	2L	22430400	22430400	22441183	4.26e-10	0.0205	S2_DM
2L_22688126_SNP	2.23e-06	0.0244	FBgn0262887	2L	22961737	22961737	22963456	4.26e-10	0.0205	S2_DM
2L_22688128_MNP	5.1e-06	0.0202	FBgn0040009	2L	22430400	22430400	22441183	7.94e-09	0.0205	S2_DM
2L_22688133_SNP	3.31e-06	0.0202	FBgn0040009	2L	22430400	22430400	22441183	6.64e-09	0.0205	S2_DM
2L_22690031_SNP	1.14e-07	0.0202	FBgn0040009	2L	22430400	22430400	22441183	1.79e-14	0.0205	S2_DM
2L_22690031_SNP	1.14e-07	0.0202	FBgn0040009	2L	22430400	22430400	22441183	2.91e-09	0.0177	DOC4_DM
2L_22690031_SNP	1.67e-08	0.0244	FBgn0262887	2L	22961737	22961737	22963456	1.79e-14	0.0205	S2_DM
2L_22690031_SNP	1.67e-08	0.0244	FBgn0262887	2L	22961737	22961737	22963456	2.91e-09	0.0177	DOC4_DM
2L_22690031_SNP	3.27e-06	0.0484	XLOC_006268	2R	21910	21910	24748	2.91e-09	0.0177	DOC4_DM
2L_22690031_SNP	3.27e-06	0.0484	XLOC_006268	2R	21910	21910	24748	1.79e-14	0.0205	S2_DM
2L_22690031_SNP	3.26e-07	0.0499	XLOC_011651	2RHet	861402	861402	862533	1.79e-14	0.0205	S2_DM
2L_22690031_SNP	3.26e-07	0.0499	XLOC_011651	2RHet	861402	861402	862533	2.91e-09	0.0177	DOC4_DM
2L_22690031_SNP	2.74e-06	0.05	XLOC_011704	2RHet	1921599	1921599	1923490	1.79e-14	0.0205	S2_DM
2L_22690031_SNP	2.74e-06	0.05	XLOC_011704	2RHet	1921599	1921599	1923490	2.91e-09	0.0177	DOC4_DM
2L_22690031_SNP	9.86e-08	0.0489	XLOC_011853	2RHet	624599	623448	624599	1.79e-14	0.0205	S2_DM
2L_22690031_SNP	9.86e-08	0.0489	XLOC_011853	2RHet	624599	623448	624599	2.91e-09	0.0177	DOC4_DM
2L_22690031_SNP	1.62e-08	0.0498	XLOC_011921	2RHet	990729	989859	990729	1.79e-14	0.0205	S2_DM
2L_22690031_SNP	1.62e-08	0.0498	XLOC_011921	2RHet	990729	989859	990729	2.91e-09	0.0177	DOC4_DM
2L_22690032_INS	1.87e-07	0.0202	FBgn0040009	2L	22430400	22430400	22441183	2.42e-14	0.0205	S2_DM
2L_22690032_INS	1.87e-07	0.0202	FBgn0040009	2L	22430400	22430400	22441183	4.12e-09	0.0177	DOC4_DM
2L_22690032_INS	1.94e-08	0.0244	FBgn0262887	2L	22961737	22961737	22963456	2.42e-14	0.0205	S2_DM
2L_22690032_INS	1.94e-08	0.0244	FBgn0262887	2L	22961737	22961737	22963456	4.12e-09	0.0177	DOC4_DM
2L_22690032_INS	5.25e-07	0.0499	XLOC_011651	2RHet	861402	861402	862533	4.12e-09	0.0177	DOC4_DM
2L_22690032_INS	5.25e-07	0.0499	XLOC_011651	2RHet	861402	861402	862533	2.42e-14	0.0205	S2_DM
2L_22690032_INS	1.18e-06	0.05	XLOC_011704	2RHet	1921599	1921599	1923490	4.12e-09	0.0177	DOC4_DM
2L_22690032_INS	1.18e-06	0.05	XLOC_011704	2RHet	1921599	1921599	1923490	2.42e-14	0.0205	S2_DM
2L_22690032_INS	2.21e-07	0.0489	XLOC_011853	2RHet	624599	623448	624599	2.42e-14	0.0205	S2_DM
2L_22690032_INS	2.21e-07	0.0489	XLOC_011853	2RHet	624599	623448	624599	4.12e-09	0.0177	DOC4_DM
2L_22690032_INS	9.25e-09	0.0498	XLOC_011921	2RHet	990729	989859	990729	2.42e-14	0.0205	S2_DM
2L_22690032_INS	9.25e-09	0.0498	XLOC_011921	2RHet	990729	989859	990729	4.12e-09	0.0177	DOC4_DM
2L_22690124_SNP	1.49e-07	0.0202	FBgn0040009	2L	22430400	22430400	22441183	5.91e-06	0.0205	S2_DM
2L_22690124_SNP	2.93e-06	0.0244	FBgn0262887	2L	22961737	22961737	22963456	5.91e-06	0.0205	S2_DM
2L_22690124_SNP	2.62e-12	0.0498	XLOC_003055	2L	22739320	22739320	22739796	5.91e-06	0.0205	S2_DM
2L_22690124_SNP	2.06e-06	0.0493	XLOC_006087	2L	22736356	22705670	22736356	5.91e-06	0.0205	S2_DM
2L_22690315_SNP	9.04e-09	0.0202	FBgn0040009	2L	22430400	22430400	22441183	3.01e-17	0.0205	S2_DM
2L_22690315_SNP	9.04e-09	0.0202	FBgn0040009	2L	22430400	22430400	22441183	4.92e-07	0.0177	DOC4_DM
2L_22690315_SNP	2.67e-09	0.0244	FBgn0262887	2L	22961737	22961737	22963456	4.92e-07	0.0177	DOC4_DM
2L_22690315_SNP	2.67e-09	0.0244	FBgn0262887	2L	22961737	22961737	22963456	3.01e-17	0.0205	S2_DM
2L_22690315_SNP	1.03e-08	0.0498	XLOC_003055	2L	22739320	22739320	22739796	3.01e-17	0.0205	S2_DM
2L_22690315_SNP	1.03e-08	0.0498	XLOC_003055	2L	22739320	22739320	22739796	4.92e-07	0.0177	DOC4_DM
2L_22690315_SNP	3.57e-07	0.0493	XLOC_006087	2L	22736356	22705670	22736356	3.01e-17	0.0205	S2_DM
2L_22690315_SNP	3.57e-07	0.0493	XLOC_006087	2L	22736356	22705670	22736356	4.92e-07	0.0177	DOC4_DM
2L_22690315_SNP	1.31e-08	0.0499	XLOC_011651	2RHet	861402	861402	862533	4.92e-07	0.0177	DOC4_DM
2L_22690315_SNP	1.31e-08	0.0499	XLOC_011651	2RHet	861402	861402	862533	3.01e-17	0.0205	S2_DM
2L_22690315_SNP	3.42e-06	0.05	XLOC_011704	2RHet	1921599	1921599	1923490	3.01e-17	0.0205	S2_DM
2L_22690315_SNP	3.42e-06	0.05	XLOC_011704	2RHet	1921599	1921599	1923490	4.92e-07	0.0177	DOC4_DM
2L_22690315_SNP	9.58e-08	0.0489	XLOC_011853	2RHet	624599	623448	624599	4.92e-07	0.0177	DOC4_DM
2L_22690315_SNP	9.58e-08	0.0489	XLOC_011853	2RHet	624599	623448	624599	3.01e-17	0.0205	S2_DM
2L_22691025_SNP	1.18e-08	0.0202	FBgn0040009	2L	22430400	22430400	22441183	3.6e-18	0.0205	S2_DM
2L_22691025_SNP	1.18e-08	0.0202	FBgn0040009	2L	22430400	22430400	22441183	1.08e-07	0.0177	DOC4_DM
2L_22691025_SNP	1.87e-09	0.0244	FBgn0262887	2L	22961737	22961737	22963456	1.08e-07	0.0177	DOC4_DM
2L_22691025_SNP	1.87e-09	0.0244	FBgn0262887	2L	22961737	22961737	22963456	3.6e-18	0.0205	S2_DM
2L_22691025_SNP	1.06e-07	0.0498	XLOC_003055	2L	22739320	22739320	22739796	3.6e-18	0.0205	S2_DM
2L_22691025_SNP	1.06e-07	0.0498	XLOC_003055	2L	22739320	22739320	22739796	1.08e-07	0.0177	DOC4_DM
2L_22691025_SNP	8.06e-07	0.0493	XLOC_006087	2L	22736356	22705670	22736356	1.08e-07	0.0177	DOC4_DM
2L_22691025_SNP	8.06e-07	0.0493	XLOC_006087	2L	22736356	22705670	22736356	3.6e-18	0.0205	S2_DM
2L_22691025_SNP	5.68e-06	0.0484	XLOC_006268	2R	21910	21910	24748	3.6e-18	0.0205	S2_DM
2L_22691025_SNP	5.68e-06	0.0484	XLOC_006268	2R	21910	21910	24748	1.08e-07	0.0177	DOC4_DM
2L_22691025_SNP	8.46e-09	0.0499	XLOC_011651	2RHet	861402	861402	862533	1.08e-07	0.0177	DOC4_DM
2L_22691025_SNP	8.46e-09	0.0499	XLOC_011651	2RHet	861402	861402	862533	3.6e-18	0.0205	S2_DM
2L_22691025_SNP	4.82e-06	0.05	XLOC_011704	2RHet	1921599	1921599	1923490	3.6e-18	0.0205	S2_DM
2L_22691025_SNP	4.82e-06	0.05	XLOC_011704	2RHet	1921599	1921599	1923490	1.08e-07	0.0177	DOC4_DM
2L_22691025_SNP	4.49e-08	0.0489	XLOC_011853	2RHet	624599	623448	624599	1.08e-07	0.0177	DOC4_DM
2L_22691025_SNP	4.49e-08	0.0489	XLOC_011853	2RHet	624599	623448	624599	3.6e-18	0.0205	S2_DM
2L_22691028_SNP	1.61e-08	0.0202	FBgn0040009	2L	22430400	22430400	22441183	9.07e-18	0.0205	S2_DM
2L_22691028_SNP	1.61e-08	0.0202	FBgn0040009	2L	22430400	22430400	22441183	9.04e-08	0.0177	DOC4_DM
2L_22691028_SNP	9.32e-10	0.0244	FBgn0262887	2L	22961737	22961737	22963456	9.07e-18	0.0205	S2_DM
2L_22691028_SNP	9.32e-10	0.0244	FBgn0262887	2L	22961737	22961737	22963456	9.04e-08	0.0177	DOC4_DM
2L_22691028_SNP	1.24e-07	0.0498	XLOC_003055	2L	22739320	22739320	22739796	9.04e-08	0.0177	DOC4_DM
2L_22691028_SNP	1.24e-07	0.0498	XLOC_003055	2L	22739320	22739320	22739796	9.07e-18	0.0205	S2_DM
2L_22691028_SNP	8.03e-07	0.0493	XLOC_006087	2L	22736356	22705670	22736356	9.04e-08	0.0177	DOC4_DM
2L_22691028_SNP	8.03e-07	0.0493	XLOC_006087	2L	22736356	22705670	22736356	9.07e-18	0.0205	S2_DM
2L_22691028_SNP	1.13e-08	0.0499	XLOC_011651	2RHet	861402	861402	862533	9.07e-18	0.0205	S2_DM
2L_22691028_SNP	1.13e-08	0.0499	XLOC_011651	2RHet	861402	861402	862533	9.04e-08	0.0177	DOC4_DM
2L_22691028_SNP	1.7e-06	0.05	XLOC_011704	2RHet	1921599	1921599	1923490	9.07e-18	0.0205	S2_DM
2L_22691028_SNP	1.7e-06	0.05	XLOC_011704	2RHet	1921599	1921599	1923490	9.04e-08	0.0177	DOC4_DM
2L_22691028_SNP	3.45e-08	0.0489	XLOC_011853	2RHet	624599	623448	624599	9.07e-18	0.0205	S2_DM
2L_22691028_SNP	3.45e-08	0.0489	XLOC_011853	2RHet	624599	623448	624599	9.04e-08	0.0177	DOC4_DM
2L_22691055_SNP	8.09e-09	0.05	XLOC_011704	2RHet	1921599	1921599	1923490	1.09e-09	0.0205	S2_DM
2L_22691148_SNP	2.16e-09	0.0202	FBgn0040009	2L	22430400	22430400	22441183	3.04e-06	0.0177	DOC4_DM
2L_22691148_SNP	2.16e-09	0.0202	FBgn0040009	2L	22430400	22430400	22441183	2.77e-14	0.0205	S2_DM
2L_22691148_SNP	2.83e-08	0.0244	FBgn0262887	2L	22961737	22961737	22963456	2.77e-14	0.0205	S2_DM
2L_22691148_SNP	2.83e-08	0.0244	FBgn0262887	2L	22961737	22961737	22963456	3.04e-06	0.0177	DOC4_DM
2L_22691148_SNP	1.05e-08	0.0498	XLOC_003055	2L	22739320	22739320	22739796	2.77e-14	0.0205	S2_DM
2L_22691148_SNP	1.05e-08	0.0498	XLOC_003055	2L	22739320	22739320	22739796	3.04e-06	0.0177	DOC4_DM
2L_22691148_SNP	5.85e-08	0.0499	XLOC_011651	2RHet	861402	861402	862533	3.04e-06	0.0177	DOC4_DM
2L_22691148_SNP	5.85e-08	0.0499	XLOC_011651	2RHet	861402	861402	862533	2.77e-14	0.0205	S2_DM
2L_22691148_SNP	5.63e-08	0.0489	XLOC_011853	2RHet	624599	623448	624599	2.77e-14	0.0205	S2_DM
2L_22691148_SNP	5.63e-08	0.0489	XLOC_011853	2RHet	624599	623448	624599	3.04e-06	0.0177	DOC4_DM
2L_22691317_SNP	8.06e-08	0.0202	FBgn0040009	2L	22430400	22430400	22441183	4.49e-08	0.0177	DOC4_DM
2L_22691317_SNP	8.06e-08	0.0202	FBgn0040009	2L	22430400	22430400	22441183	4.94e-16	0.0205	S2_DM
2L_22691317_SNP	1.8e-08	0.0244	FBgn0262887	2L	22961737	22961737	22963456	4.94e-16	0.0205	S2_DM
2L_22691317_SNP	1.8e-08	0.0244	FBgn0262887	2L	22961737	22961737	22963456	4.49e-08	0.0177	DOC4_DM
2L_22691317_SNP	1.98e-08	0.0498	XLOC_003055	2L	22739320	22739320	22739796	4.94e-16	0.0205	S2_DM
2L_22691317_SNP	1.98e-08	0.0498	XLOC_003055	2L	22739320	22739320	22739796	4.49e-08	0.0177	DOC4_DM
2L_22691317_SNP	4.96e-08	0.0493	XLOC_006087	2L	22736356	22705670	22736356	4.94e-16	0.0205	S2_DM
2L_22691317_SNP	4.96e-08	0.0493	XLOC_006087	2L	22736356	22705670	22736356	4.49e-08	0.0177	DOC4_DM
2L_22691317_SNP	7.79e-09	0.0499	XLOC_011651	2RHet	861402	861402	862533	4.49e-08	0.0177	DOC4_DM
2L_22691317_SNP	7.79e-09	0.0499	XLOC_011651	2RHet	861402	861402	862533	4.94e-16	0.0205	S2_DM
2L_22691317_SNP	1.23e-09	0.0489	XLOC_011853	2RHet	624599	623448	624599	4.49e-08	0.0177	DOC4_DM
2L_22691317_SNP	1.23e-09	0.0489	XLOC_011853	2RHet	624599	623448	624599	4.94e-16	0.0205	S2_DM
2L_22691394_SNP	8.84e-12	0.05	XLOC_011704	2RHet	1921599	1921599	1923490	1.52e-08	0.0205	S2_DM
2L_22691394_SNP	7.46e-09	0.0494	XLOC_011705	2RHet	1924263	1924263	1926950	1.52e-08	0.0205	S2_DM
2L_22691394_SNP	1.71e-06	0.0487	XLOC_011789	2RHet	3215567	3215567	3217239	1.52e-08	0.0205	S2_DM
2L_22691394_SNP	1.41e-06	0.0488	XLOC_011977	2RHet	1591609	1590552	1591609	1.52e-08	0.0205	S2_DM
2L_22691394_SNP	4.34e-07	0.0488	XLOC_012081	2RHet	3151739	3149849	3151739	1.52e-08	0.0205	S2_DM
2L_22691451_SNP	4.35e-08	0.0202	FBgn0040009	2L	22430400	22430400	22441183	7.31e-09	0.0205	S2_DM
2L_22691676_SNP	8.61e-10	0.0202	FBgn0040009	2L	22430400	22430400	22441183	5.44e-08	0.0177	DOC4_DM
2L_22691676_SNP	8.61e-10	0.0202	FBgn0040009	2L	22430400	22430400	22441183	6.2e-18	0.0205	S2_DM
2L_22691676_SNP	1.84e-09	0.0244	FBgn0262887	2L	22961737	22961737	22963456	5.44e-08	0.0177	DOC4_DM
2L_22691676_SNP	1.84e-09	0.0244	FBgn0262887	2L	22961737	22961737	22963456	6.2e-18	0.0205	S2_DM
2L_22691676_SNP	8.9e-09	0.0498	XLOC_003055	2L	22739320	22739320	22739796	5.44e-08	0.0177	DOC4_DM
2L_22691676_SNP	8.9e-09	0.0498	XLOC_003055	2L	22739320	22739320	22739796	6.2e-18	0.0205	S2_DM
2L_22691676_SNP	3.67e-07	0.0493	XLOC_006087	2L	22736356	22705670	22736356	6.2e-18	0.0205	S2_DM
2L_22691676_SNP	3.67e-07	0.0493	XLOC_006087	2L	22736356	22705670	22736356	5.44e-08	0.0177	DOC4_DM
2L_22691676_SNP	2.03e-06	0.0484	XLOC_006268	2R	21910	21910	24748	6.2e-18	0.0205	S2_DM
2L_22691676_SNP	2.03e-06	0.0484	XLOC_006268	2R	21910	21910	24748	5.44e-08	0.0177	DOC4_DM
2L_22691676_SNP	2.74e-09	0.0499	XLOC_011651	2RHet	861402	861402	862533	5.44e-08	0.0177	DOC4_DM
2L_22691676_SNP	2.74e-09	0.0499	XLOC_011651	2RHet	861402	861402	862533	6.2e-18	0.0205	S2_DM
2L_22691676_SNP	9.32e-07	0.05	XLOC_011704	2RHet	1921599	1921599	1923490	5.44e-08	0.0177	DOC4_DM
2L_22691676_SNP	9.32e-07	0.05	XLOC_011704	2RHet	1921599	1921599	1923490	6.2e-18	0.0205	S2_DM
2L_22691676_SNP	3.53e-08	0.0489	XLOC_011853	2RHet	624599	623448	624599	5.44e-08	0.0177	DOC4_DM
2L_22691676_SNP	3.53e-08	0.0489	XLOC_011853	2RHet	624599	623448	624599	6.2e-18	0.0205	S2_DM
2L_22691722_SNP	3.48e-08	0.0202	FBgn0040009	2L	22430400	22430400	22441183	5.03e-08	0.0177	DOC4_DM
2L_22691722_SNP	3.48e-08	0.0202	FBgn0040009	2L	22430400	22430400	22441183	5.14e-16	0.0205	S2_DM
2L_22691722_SNP	1.11e-07	0.0244	FBgn0262887	2L	22961737	22961737	22963456	5.03e-08	0.0177	DOC4_DM
2L_22691722_SNP	1.11e-07	0.0244	FBgn0262887	2L	22961737	22961737	22963456	5.14e-16	0.0205	S2_DM
2L_22691722_SNP	2.22e-09	0.0498	XLOC_003055	2L	22739320	22739320	22739796	5.14e-16	0.0205	S2_DM
2L_22691722_SNP	2.22e-09	0.0498	XLOC_003055	2L	22739320	22739320	22739796	5.03e-08	0.0177	DOC4_DM
2L_22691722_SNP	6.77e-07	0.0493	XLOC_006087	2L	22736356	22705670	22736356	5.14e-16	0.0205	S2_DM
2L_22691722_SNP	6.77e-07	0.0493	XLOC_006087	2L	22736356	22705670	22736356	5.03e-08	0.0177	DOC4_DM
2L_22691722_SNP	6.66e-06	0.0484	XLOC_006268	2R	21910	21910	24748	5.03e-08	0.0177	DOC4_DM
2L_22691722_SNP	6.66e-06	0.0484	XLOC_006268	2R	21910	21910	24748	5.14e-16	0.0205	S2_DM
2L_22691722_SNP	2.23e-09	0.0499	XLOC_011651	2RHet	861402	861402	862533	5.14e-16	0.0205	S2_DM
2L_22691722_SNP	2.23e-09	0.0499	XLOC_011651	2RHet	861402	861402	862533	5.03e-08	0.0177	DOC4_DM
2L_22691722_SNP	1.39e-07	0.0489	XLOC_011853	2RHet	624599	623448	624599	5.03e-08	0.0177	DOC4_DM
[truncated: 16,573 more rows]
