# Supplementary material for: Gene expression networks in the Drosophila Genetic Reference Panel
Source: HighWire-hosted journal article supplement (doi:10.1101/gr.257592.119), 2020-03-01
Supplement: Supplemental_Table_S10.xlsx.xlsx [file Supplemental_Table_S10.xlsx.xlsx]

## Sheet: Table S10A
Microbial Species	100_F1	100_F2	100_M1	100_M2	101_F1	101_F2	101_M1	101_M2	105_F1	105_F2	105_M1	105_M2	109_F1	109_F2	109_M1	109_M2	129_F1	129_F2	129_M1	129_M2	136_F1	136_F2	136_M1	136_M2	138_F1	138_F2	138_M1	138_M2	142_F1	142_F2	142_M1	142_M2	149_F1	149_F2	149_M1	149_M2	153_F1	153_F2	153_M1	153_M2	158_F1	158_F2	158_M1	158_M2	161_F1	161_F2	161_M1	161_M2	176_F1
Wolbachia pipentis	14.3251	14.878	15.0175	15.9315	6.97859	5.46772	5.29449	5.62364	7.70994	3.75171	3.87382	4.37535	3.8244	6.19376	7.13132	3.88253	7.78198	4.91534	6.45473	4.50871	13.9645	14.2213	15.4054	14.9728	2.73146	3.98975	3.92439	4.29024	14.0446	14.1004	13.6911	16.0523	14.3644	14.6371	15.2225	15.459	14.9241	14.7064	14.8199	15.6465	3.23105	4.05675	4.29692	4.12723	4.92593	4.40109	5.17719	4.9931	14.5229
Sum of Non-Wolbachia Species	13.6075	13.4653	14.0793	14.3158	13.3879	13.8357	14.7013	14.2437	13.8801	14.2228	14.1686	14.3178	14.9285	14.2157	14.7499	15.7539	13.8483	14.4696	14.4268	13.8551	12.8867	12.8001	13.8448	13.7341	12.9954	13.6994	13.3021	13.8275	13.2904	12.9147	12.4691	14.6671	13.4933	13.5245	13.3711	14.6778	13.2525	13.4106	14.3313	13.5544	15.3687	15.5124	14.7448	14.6657	13.5296	13.1977	12.965	13.75	13.2193
Acetobacter aceti	9.41018	9.60674	9.00268	10.3469	7.01469	7.40321	8.32433	7.6294	11.6304	12.2578	12.2513	12.4496	8.38821	8.25605	7.98903	9.15545	10.0663	7.50876	10.1476	8.16855	10.1211	10.3234	11.1093	11.231	9.24451	11.8913	9.88775	11.9265	10.7506	8.62417	10.515	9.60534	9.45958	8.63573	7.88994	7.98165	10.1307	9.913	9.78343	10.0814	8.92703	9.5615	8.22247	9.53578	8.29055	8.45778	8.6611	9.31088	10.2634
Acetobacter cibinongensis	3.51134	3.16541	3.80199	3.97268	3.03367	4.72095	3.65784	4.15555	4.53073	4.82231	4.04484	4.62092	5.85247	4.93261	5.56011	6.72042	3.754	3.56336	3.08996	3.68248	2.79284	2.44199	2.82863	3.08875	3.92196	4.15371	4.31602	4.82049	3.64184	1.99945	3.37061	3.48864	3.66288	4.53425	2.64334	3.54542	2.60938	3.13278	2.05499	3.26578	6.27299	6.4573	5.42807	5.41696	4.35855	2.47082	3.07082	3.24527	3.42085
Acetobacter ghanensis	5.83909	5.66311	5.80778	6.35979	4.86582	6.30176	5.53761	5.92338	6.72821	7.0741	6.7142	6.89864	7.56108	7.28782	6.63544	8.40336	6.45923	5.21667	6.24756	5.44222	5.50595	4.98983	5.29516	5.3587	6.03497	6.25993	6.3531	6.87409	5.90416	4.01156	5.42339	4.89066	6.7458	7.16615	5.15632	6.36112	5.26911	5.12689	4.79236	5.07971	8.27208	8.16541	7.28009	7.33199	6.03717	4.90042	5.45634	5.92253	5.90863
Acetobacter indonesiensis	3.96173	3.37184	4.63788	3.8666	2.76362	3.88038	2.81388	3.82359	4.97456	5.48637	6.07811	5.85043	5.50412	7.17243	5.01921	6.56983	4.9918	3.22138	4.19505	3.3876	3.0762	2.80126	3.89382	3.92721	5.10531	4.69835	5.43435	5.40252	3.86954	2.29115	3.7295	3.10279	5.99174	7.51972	4.51126	6.46271	3.25085	3.5497	2.61631	3.99329	6.20717	6.96551	5.25769	6.67635	4.17608	2.96824	3.86251	4.04467	3.76238
Acetobacter malorum	3.35495	2.27247	3.86182	3.83142	2.0686	3.64072	2.71605	3.21836	4.73262	5.30469	5.1412	5.53695	5.15253	5.84212	4.79683	6.8233	3.81615	3.44244	3.04063	2.64576	3.19095	3.27195	4.05091	4.17911	7.05642	5.2982	7.30861	6.07436	3.82745	2.61707	3.762	3.26627	7.9421	9.42207	6.35644	8.41719	3.071	4.7851	2.36842	5.50865	5.59006	5.5935	4.44625	4.81992	3.31512	2.14896	2.94953	3.18913	4.27536
Acetobacter nitrogenifigens	5.35347	5.57635	5.01557	6.216	2.99805	3.39499	4.24934	3.07317	7.42696	8.19628	8.03851	8.30578	4.37495	5.06557	3.8405	4.90185	6.05942	3.47363	6.04048	3.98731	6.07834	6.32216	6.89293	7.07366	5.40206	7.7549	6.00631	7.93617	6.78314	4.45858	6.63605	5.42843	5.61293	5.35376	4.26047	4.61292	5.91034	5.68528	5.36253	5.99322	5.13351	5.54498	4.19186	5.53484	4.35378	4.25107	4.87139	5.45013	6.1938
Acetobacter okinawensis	3.93251	3.64626	4.19092	4.32864	3.16796	4.95211	4.12143	4.84854	4.69013	4.94916	4.27224	4.5392	6.37021	5.48803	6.00283	7.21602	4.20264	4.01416	3.94995	4.1885	3.16527	2.61996	2.98061	2.80868	4.29236	4.11137	4.58305	4.76478	3.75328	2.33122	3.22278	3.7194	4.52859	4.89644	3.41618	4.22592	2.94603	3.25061	2.18864	3.28901	6.75729	6.92418	5.91349	5.78486	4.60321	2.99209	3.48582	3.91915	3.76238
Acetobacter orientalis	2.61625	2.05012	3.16201	3.33291	2.50909	4.03384	2.97059	3.5826	3.72041	3.83293	2.69492	3.03607	5.07557	4.40498	4.92972	6.19656	3.0559	2.8337	2.44316	2.91702	2.24114	1.06099	1.65896	0.927873	3.58868	2.77414	3.92241	3.92994	2.97426	1.38958	2.72595	2.70691	3.17044	4.34444	2.14676	3.43243	1.68195	2.38566	1.70844	2.52266	5.79911	5.85674	4.87919	4.7336	3.50775	1.76203	2.35196	2.70377	2.64051
Acetobacter papayae	5.13842	3.82748	5.12292	5.01768	3.48343	4.97986	4.14981	5.03434	5.74042	6.01559	5.86879	6.243	4.99427	4.69988	4.11879	5.75456	4.74027	2.70819	4.31398	3.34228	4.12578	4.15675	4.98048	4.78253	4.81609	5.88225	5.50071	6.64827	5.04508	3.78507	4.47007	4.89066	4.52029	4.72812	2.87567	3.7479	4.27175	4.03345	3.7214	4.12564	6.68659	6.78597	6.08698	5.83439	4.04613	2.82955	3.43249	4.12467	4.3499
Acetobacter pasteurianus	11.5424	11.1437	11.8495	11.795	11.095	12.8405	11.8868	12.7338	12.0539	11.772	9.77394	10.9136	14.2601	12.8784	13.7694	15.1312	11.3948	11.8243	10.8657	11.9474	9.57155	8.49975	9.33226	8.51957	11.4491	10.7038	11.7709	11.5717	9.58976	10.1553	8.89475	11.158	10.9249	10.3592	9.97803	9.68821	9.57796	10.4317	8.88766	10.6049	14.5269	14.7695	13.745	13.5112	12.219	10.0545	10.5249	11.1632	10.5582
Acetobacter persici	3.67465	2.88647	3.94077	3.80747	2.26121	3.70031	2.72865	3.49663	4.97308	5.46784	5.20031	5.56765	5.28377	5.72885	4.55641	7.09225	3.66994	2.40262	3.10203	3.19709	3.15661	2.80126	4.17691	3.82904	7.77093	5.4588	7.99448	6.4025	4.15526	2.55074	4.01066	3.17774	8.66183	9.88965	7.05991	9.009	3.35283	5.38864	2.67215	5.81586	5.66171	5.34024	4.422	4.63351	3.34427	2.0388	2.89801	3.21185	4.62326
Acetobacter pomorum	9.48371	9.02624	9.88458	9.72299	8.71897	10.5754	9.82087	10.8184	10.0181	9.85146	7.75733	9.22228	12.255	10.9512	11.8392	13.1303	9.49443	10.043	9.14151	10.0399	7.71989	6.38887	7.28969	6.6055	9.43969	8.66784	9.7622	9.52776	7.64337	8.39879	7.08847	9.53224	8.62618	7.91233	7.74534	7.38546	7.60218	8.49391	7.34149	8.81353	12.5542	12.9111	12.0569	11.9177	10.1094	8.18303	8.57196	9.37676	8.69263
Acetobacter senegalensis	6.30583	5.19277	7.12945	6.23295	5.04231	6.5762	5.72532	6.38644	7.11731	7.38406	8.03002	7.59715	7.98242	9.5176	7.53233	9.18298	6.96752	5.91532	6.29038	5.92456	4.79548	4.54035	5.16898	5.13866	6.3862	6.38453	6.71635	7.16536	5.55213	4.11847	5.28736	5.28323	6.63166	7.96367	5.54536	7.00295	4.67763	5.06792	4.25086	5.31177	8.94015	9.47358	7.7269	9.00409	6.7031	4.97111	6.07551	6.35765	5.70665
Acetobacter syzygii	3.66135	3.35804	3.52291	4.10134	2.88559	4.61435	3.65784	4.28574	4.67387	4.83024	4.30443	4.64579	5.97407	4.8549	5.38809	6.80056	4.09215	3.62021	3.34486	3.59502	3.32071	2.59397	3.17173	3.2185	3.83734	4.12967	4.25613	4.74419	3.64184	2.29115	3.05805	3.3658	3.82439	3.66641	2.58621	2.74801	2.92631	2.90015	2.49768	3.07583	6.54576	6.41601	5.61078	5.3779	4.12662	2.21123	3.01549	3.32036	3.52563
Acetobacter tropicalis	6.33403	4.52171	7.27366	5.57009	4.4508	5.80281	5.37483	5.54323	7.00481	7.33192	9.10453	8.04411	7.49796	10.1205	7.30208	8.78281	7.36212	5.43444	6.63065	5.66716	4.48537	4.22607	5.35435	5.27914	5.59037	6.10823	5.97044	6.84161	5.09643	3.71107	4.77439	4.90727	6.38662	8.09089	5.32078	7.17087	4.31788	4.48499	3.97557	4.92222	8.43126	9.69637	7.5752	9.49344	6.78509	5.1192	6.33079	6.41139	5.37303
Acidiphilium angustum	-0.153442	-0.0191526	0.7106	0.229661	-0.322252	1.69228	0.691189	1.18781	0.685576	0.490708	-0.372333	0.4394	3.08227	1.30809	2.39043	3.81604	-0.0980114	0.734831	-0.994798	-0.0410435	-0.893983	-2.59393	-1.33785	-2.31362	0.885324	-0.441343	0.715224	0.262674	-0.0423556	-0.856281	-0.370887	0.0451274	-0.412757	-0.653363	-0.870823	-1.64002	-0.83948	-1.24861	-0.382047	-0.298936	3.49896	3.13483	2.19496	1.97224	1.02291	-1.12832	-0.00762321	0.020474	-0.0671599
Acidomonas methanolica	2.50155	2.14963	2.43488	2.60718	1.43137	2.69206	1.9494	2.61804	4.09619	4.6083	4.52015	4.70222	4.19866	3.5285	3.44784	4.66046	2.63107	1.4507	2.26136	2.24728	2.81503	2.64549	3.29286	3.62182	2.5453	4.04221	3.11809	4.0872	3.08836	1.56786	2.62748	1.68161	2.62737	2.63	1.08657	1.31025	2.48012	2.3332	2.32263	2.6357	4.88115	4.40752	3.74495	3.69842	2.52495	0.869312	1.83568	1.76671	3.02548
Acidovorax sp.	-0.153442	0.243638	-0.551201	0.155726	1.26151	0.436559	-0.115496	0.124368	-1.0493	0.490708	-0.31101	0.714849	-0.449361	1.05363	-0.86356	-0.247305	0.349036	1.62752	0.950603	1.59538	0.426336	1.64572	0.718273	0.927873	0.738567	2.01649	-0.378106	0.542569	0.37231	1.86942	-0.370887	2.94008	0.0841823	1.78219	0.815413	0.815727	-0.447777	0.0388669	0.498449	1.7272	-0.796339	-0.047636	-1.45674	1.51294	0.204023	1.99227	0.287564	0.020474	-1.44326
Acidovorax temperans	-1.674	-3.32798	-2.13194	-1.76665	-1.73429	-1.72964	-1.52793	-0.164845	-1.95358	-1.93774	-1.8924	-1.22126	-3.10186	-3.18185	-1.70946	-9.96578	-0.971194	-2.48036	-0.481088	-1.62304	-1.04569	-1.18435	-0.339671	-2.31362	-0.979343	-1.177	-3.25368	-1.95532	-1.04087	-0.534876	-3.2971	-0.124623	-1.32859	-1.23719	-1.45447	-2.63553	-1.25366	-1.09695	-1.62739	-0.910974	-3.68704	-1.5684	-3.1845	-1.22116	-2.87408	-0.766451	-2.46054	-0.616166	-1.7642
Acinetobacter gyllenbergii	-2.34931	-2.33524	-1.28676	-2.08735	-3.30968	-1.14627	-3.1046	-1.01155	-1.78427	-0.677934	-1.57154	-1.48362	-3.68064	-3.18185	-2.44328	-2.48882	-1.23366	-2.48036	-1.8	-1.62304	-0.893983	-1.59829	-1.60015	1.26475	-0.312972	-0.955077	-2.26058	-3.52913	-2.93962	-0.27219	-0.309564	-0.801751	-1.91174	-0.238893	-1.04042	-2.05356	-1.8369	-0.959729	0.176776	-0.910974	-9.96578	-1.24733	-3.76292	-0.63732	-2.29264	-0.0304678	-1.87823	-1.78333	-1.44326
Acinetobacter johnsonii	0.40994	1.18165	0.447742	0.229661	0.676846	0.173738	0.741785	0.472007	-0.786762	-0.176113	-0.31101	-0.348322	-0.609594	-0.134519	-0.574531	-0.794002	-0.387175	0.627982	0.719407	0.489014	1.104	0.337074	0.533968	1.48706	1.71215	0.0435243	0.561289	-0.0208578	-0.305093	1.18613	2.93042	1.26672	-0.108268	1.00805	0.957355	-0.642271	-0.140033	0.386489	1.8115	1.39172	-1.11764	-1.39896	-2.19107	0.776315	-0.075817	1.06186	0.780262	0.382728	0.401906
Acinetobacter sp.	0.130065	0.565323	0.628189	-0.506484	-0.152527	0.266767	0.407591	-0.748999	-1.49567	-3.2514	-0.573687	-0.222945	-0.88923	-1.45407	-0.71182	-0.794002	-0.971194	0.320082	-0.632867	-2.20578	1.93153	-0.72581	-0.117539	1.92749	2.14013	-0.955077	0.99625	-0.958116	-0.0423556	0.949207	2.0229	0.575212	0.405838	-0.538061	1.83966	-0.058059	0.77349	0.437077	2.31095	1.32135	-0.895696	-1.76044	-1.07915	0.279162	-0.423326	0.968795	1.33942	0.736124	0.401906
Agrobacterium tumefaciens	-0.506633	-0.755144	-0.872601	-0.391165	-0.514639	-1.40867	-0.79263	-0.526953	-0.257013	-0.803255	-0.31101	0.583689	-0.609594	-0.777485	-2.44328	-1.90656	-0.387175	-1.07036	-0.218389	-0.887853	-0.631396	-0.72581	0.396564	0.487571	-0.260569	0.483728	-0.886327	0.0993194	-0.0423556	-1.27045	-1.89096	-0.317043	-1.49806	-0.0691573	-1.04042	-2.63553	-1.37888	-0.420038	-0.459945	-0.244554	-3.10828	-1.98202	-1.77768	-0.806964	-1.29618	-1.12832	-1.00617	0.020474	-1.44326
Asaia prunellae	1.81365	1.18165	2.12509	2.01538	0.262109	2.39513	1.46842	2.36433	3.49216	4.36057	4.1818	4.56551	4.00473	3.67548	3.39865	4.58526	1.61141	1.35344	1.48089	1.83235	1.99122	2.04154	3.55748	3.18714	2.43046	3.84958	2.79448	3.82926	2.30695	0.726939	2.31343	2.26642	2.1129	2.81489	0.764816	1.97055	1.60136	1.76828	1.34599	2.4	4.67802	4.3039	3.66042	3.47604	2.28553	0.384201	1.31343	1.70399	2.16195
Asaia sp.	1.47166	0.906154	1.8256	2.15475	0.846671	2.49464	1.01294	2.21851	2.97764	3.33485	2.87722	2.83447	3.90075	3.0657	3.083	4.65793	1.52897	1.21263	0.896184	1.03618	1.33657	1.02253	1.32204	1.53766	2.25258	2.64439	2.49297	2.97	2.04962	0.464079	1.46176	1.51816	2.09811	1.69059	0.864295	0.94119	0.886637	1.07057	0.726568	1.4588	5.03409	4.2218	3.28897	3.28869	2.04639	-0.236692	1.76074	1.29974	1.846
Aspergillus nidulans	5.71695	6.10869	5.67039	5.65808	5.34486	5.55562	5.85163	5.69155	5.55162	5.46615	5.60609	5.46424	4.1146	4.80317	5.25855	4.86285	5.41546	5.62013	5.93814	5.86171	5.86358	5.66415	5.69928	5.60106	4.39394	5.6314	4.86079	4.79402	5.65385	5.17732	4.10658	6.20698	5.8444	5.45118	5.69811	5.92725	5.80182	5.26106	4.87995	4.69587	4.66283	4.87651	4.044	4.9048	4.79132	5.79251	5.06097	5.51779	5.89269
Aspergillus terreus,Malassezia globosa	8.66055	8.80052	6.78773	7.05181	9.11266	8.57675	7.38876	6.98104	8.08043	7.95336	6.80052	6.69325	8.01885	8.16531	6.03403	5.6892	8.90275	8.37731	6.92969	6.67478	8.07258	8.37175	6.93774	7.05315	7.16667	8.73113	5.48005	5.71389	7.85381	8.32288	5.20832	7.35359	7.96725	8.03146	6.70314	7.33562	7.94503	8.17189	6.56292	6.01985	7.34718	7.5108	5.2004	6.35543	8.32202	8.32121	6.31696	6.83468	8.36371
Azospirillum brasilense	-1.09057	-2.33524	-3.44442	-0.631829	-3.30968	-0.732034	-0.655354	-1.33275	-1.25529	-0.940507	-1.8924	-2.2179	0.471706	0.0288102	-1.03316	1.50356	-0.556864	-1.07036	-2.21336	-1.20911	-0.51609	-1.86045	-1.11598	-1.31721	0.813811	-2.75546	0.715224	-0.45644	-0.363912	-2.26697	-1.43298	-2.11991	-0.252495	-0.915944	-0.719083	-1.05656	-0.83948	-2.41426	-0.722583	-1.53753	3.24278	0.382613	-0.610507	-0.999249	-0.882032	-9.96578	0.117787	-1.20002	0.0396474
Azospirillum thiophilum	-1.86599	-1.01769	-3.44442	-0.631829	-0.514639	-2.14308	-0.79263	-1.01155	-1.14862	-1.93774	-1.43443	-1.48362	-0.527254	-1.45407	-1.22538	1.02732	-1.55474	-0.611753	-1.47908	-2.20578	-0.756723	-2.59393	-0.465036	-2.31362	-0.0237917	-2.75546	-0.542938	-0.296184	-0.141785	-2.84847	-1.30778	-2.11991	-1.32859	-1.91322	-2.03745	-1.64002	-1.03176	-1.83186	-0.54229	-3.97823	0.652733	-0.570546	-1.3196	-1.22116	-1.0743	-1.35019	-1.14339	-2.77837	-0.766655
Borrelia coriaceae	7.97267	8.56473	8.87071	8.88647	5.59185	5.56022	7.04219	6.85221	6.37623	5.86023	6.78349	6.4336	3.00136	3.76704	4.94407	4.268	8.64007	8.98156	9.43606	9.61945	4.42533	4.56732	5.53095	5.44409	4.78682	5.94388	5.64601	5.68296	6.08065	6.42189	5.74034	7.66985	5.93771	5.88484	6.4354	6.78803	5.06186	4.93563	5.07036	5.06094	5.93724	6.40747	6.41521	7.40058	6.74741	7.15855	6.72565	7.20181	7.49827
Campylobacter mucosalis	-1.35299	-2.33524	-1.13511	-1.09042	-0.000684367	-0.0325162	-2.11081	-2.32912	-1.49567	-0.803255	-2.08428	-2.79951	-0.609594	-1.60564	-0.71182	-1.32341	-0.749206	-1.48439	-1.47908	0.875796	-0.631396	-0.378399	-1.11598	-0.149288	0.141109	-2.75546	-0.886327	-0.842855	1.67907	-1.85367	-1.89096	-0.539136	1.14237	-1.06764	-0.134913	0.444	1.63413	0.900731	-0.170799	-1.67461	0.295439	-2.24391	-2.45279	-1.80444	-1.29618	-1.93331	-0.765611	-0.327061	0.691214
Cardinium endosymbiont	1.67939	1.74535	2.83462	1.8138	1.58332	-0.562375	2.69052	2.57075	1.01881	1.05742	1.99742	1.86323	-0.789873	0.0793875	0.60869	0.0893734	0.689834	0.387144	0.283618	1.43194	0.175001	1.39788	1.24407	3.15508	1.01852	0.935963	0.540839	-0.842855	0.722567	0.785798	0.462284	2.60196	1.45258	1.31457	1.00173	3.18852	1.15858	0.936336	2.02671	0.754591	-0.45583	0.382613	-1.77768	0.439501	-1.55851	0.869312	-0.296808	0.119915	0.139089
Caulobacter henricii	4.9139	5.31927	3.86182	4.11604	3.36258	5.85431	3.9705	5.15951	5.08799	2.46298	3.5075	4.97836	3.67154	3.73978	4.13889	4.49464	4.08495	3.49659	4.56572	5.47758	4.81488	3.38236	3.92538	5.61585	3.57793	3.39478	3.13865	4.32455	3.81092	5.25228	3.4076	3.15937	4.05253	3.85226	3.99013	5.05249	4.36013	6.28799	4.35121	5.25981	3.99132	2.80256	3.05043	5.98007	5.05199	4.2707	3.54843	5.34616	4.54836
Chaetomium globosum	7.60535	8.56322	7.93721	8.03901	7.47361	7.3537	7.63784	7.41684	7.27505	7.3207	7.59008	7.0098	6.49428	6.76984	8.20915	7.13379	7.47375	7.38554	7.95278	7.75117	7.29958	7.58056	8.14467	7.5626	6.02445	7.61036	6.68087	6.66175	6.94068	7.07849	5.82652	8.20976	7.47801	7.07513	7.45547	7.69255	7.49668	7.58996	7.11089	6.81624	5.95962	6.44274	5.82472	6.5326	6.66029	7.34831	6.62756	7.39161	7.25327
Clostridium lentocellum	-1.50458	-1.75271	-1.45624	-3.08124	-1.73429	-0.924337	-0.655354	-1.74658	-2.6283	-1.93774	-3.29854	-3.7895	-1.52518	-3.18185	-0.86356	-3.48075	-1.23366	-0.90077	-1.21671	-1.20911	-0.893983	-4.16158	-2.3342	-1.73105	0.738567	-9.96578	-0.458169	-2.94973	-1.48725	-3.83811	-0.986564	-9.96578	-0.593073	-9.96578	0.764816	-1.31899	1.65025	-1.6102	0.795241	-2.40851	-3.10828	-4.53876	-4.74346	-2.2178	-1.87938	-2.92781	-1.87823	-2.19671	0.232117
Corynebacterium minutissimum	-3.66025	-1.01769	-2.13194	-3.08124	-1.73429	-1.40867	-2.52378	-9.96578	-3.35933	-3.2514	-9.96578	-2.79951	-3.68064	-2.77008	-1.44721	-4.46473	-9.96578	-1.74661	-1.47908	-3.19914	-1.62916	-1.86045	-2.3342	-9.96578	-0.897039	-3.74575	-1.67792	-3.52913	-1.36206	-0.686646	-2.08284	-2.11991	-2.49399	-2.23379	-0.870823	-1.64002	-0.59196	-1.09695	-0.928667	-0.998267	-4.66857	-2.56413	-4.74346	-3.7894	-0.560636	-1.93331	-1.46452	-1.20002	-1.18087
Corynebacterium pseudogenitalium	-2.34931	-1.33889	-1.28676	-1.76665	-0.999242	-2.72486	-1.52793	-1.74658	-2.14543	-4.23773	-2.56726	-1.48362	-2.10806	-4.74086	-2.03021	-3.48075	-3.54208	-0.164882	-1.8	-2.20578	-0.631396	-1.59829	-1.33785	-1.31721	-0.210002	-9.96578	-0.886327	-4.51257	-2.13702	-1.27045	-0.646129	-9.96578	-2.17369	-1.6511	-1.45447	-2.05356	-0.59196	-0.719153	-0.382047	-1.1905	-2.3763	-2.56413	-9.96578	-2.79941	-1.29618	-9.96578	-0.880884	-1.20002	-0.95895
Corynebacterium sp.	-0.588975	1.11755	0.540785	0.0777951	0.136688	0.725872	0.741785	0.751932	0.0865757	-0.562634	-0.5034	0.776213	0.0570152	-0.777485	-0.333854	-1.03456	-0.387175	0.881588	0.00376358	0.489014	0.736468	0.620663	-0.117539	0.139928	1.45444	-1.43939	0.768963	-0.296184	-1.62435	0.390133	1.54712	1.39791	-0.0412249	0.345502	1.27913	-0.320793	0.91359	1.19337	1.49794	1.10804	-2.11451	-1.39896	-1.60831	-0.222843	-0.712402	0.149931	0.439449	-0.0863318	-0.0671599
Corynebacterium terpenotabidum	0.077646	0.243638	1.56265	0.229661	-0.999242	-0.732034	-1.11393	-1.74658	-0.70889	1.9051	-0.807773	-1.80454	-1.11118	-2.45013	-0.333854	-1.90656	-3.54208	-0.164882	-1.47908	-0.625264	0.736468	-0.72581	-1.33785	-0.319013	1.27079	-0.441343	-0.00302674	-1.37222	-1.14019	-0.27219	0.530948	-2.11991	-0.252495	-0.653363	1.08657	-1.31899	1.56781	0.485951	1.25139	-0.0454659	-2.3763	-0.984869	-1.96962	-1.80444	-1.29618	-1.35019	0.0564441	-0.464384	-0.445218
Drosophila A Virus	-9.96578	-3.32798	-2.8647	-9.96578	-9.96578	-3.71536	-1.52793	-3.32189	-9.96578	-9.96578	-3.29854	-9.96578	-9.96578	-9.96578	-9.96578	-9.96578	-9.96578	-9.96578	-9.96578	-9.96578	-9.96578	-9.96578	-9.96578	-9.96578	-9.96578	-3.74575	-9.96578	-9.96578	-4.90679	-9.96578	-9.96578	-2.11991	-9.96578	-9.96578	-9.96578	-9.96578	-4.80127	-9.96578	-9.96578	-2.98965	-9.96578	-9.96578	-9.96578	-9.96578	-9.96578	-9.96578	-9.96578	-3.76851	-9.96578
Enterococcus hirae	1.87637	0.359022	2.37296	-1.76665	-2.31685	-0.562375	-0.944356	-1.01155	-1.37048	-0.803255	-0.895078	-1.48362	-0.609594	0.647227	-0.127645	-1.49288	-1.96837	0.320082	-0.481088	-0.40319	1.56325	-1.37652	-0.465036	-2.31362	1.86148	-1.76034	0.659406	-0.151963	1.00418	0.726939	0.274802	-0.539136	1.66824	-0.538061	0.71238	-0.183453	3.54176	0.748814	1.17614	-0.0927219	1.78653	-0.047636	0.710098	-0.222843	0.364355	-0.766451	1.20455	0.53462	0.624142
Escherichia coli	3.93987	4.30139	4.95769	5.1521	5.34486	3.70862	5.75795	3.64101	3.5368	4.07917	4.29213	2.91852	5.84186	2.41998	2.8589	3.35494	3.31152	4.92384	3.82443	4.60778	3.11249	2.8238	2.89391	4.01019	3.59224	5.69218	4.86902	4.0354	3.21433	8.41024	3.16454	4.24892	2.83791	3.99311	3.47244	3.83939	3.40125	4.89775	4.30191	5.82939	5.23388	4.24117	5.69008	4.53487	5.5098	3.34671	3.40815	4.96329	2.60616
Exophiala xenobiotica	2.40913	2.82758	2.44695	3.21954	2.29095	2.85073	3.5484	2.98572	2.18069	2.07499	2.3022	2.61691	1.32368	1.94833	2.35649	2.04256	2.96476	3.4186	3.33466	4.0068	2.49591	1.83514	2.43136	2.98315	1.45444	2.09309	1.3769	1.84683	2.83083	2.48121	1.17041	3.19589	2.86438	2.13477	2.49603	3.91781	2.7802	3.07006	2.88404	2.69256	1.29485	1.28588	0.918566	2.60014	2.94838	2.50437	1.94126	2.96677	3.01243
Fimbriimonas ginsengisoli	-1.35299	-0.755144	-0.551201	0.431135	-0.999242	-1.72964	2.25828	0.571474	-9.96578	-1.45389	0.10358	-0.222945	-2.68992	-1.96695	-1.44721	-1.49288	-0.0980114	0.834309	0.655317	-0.887853	-1.62916	-2.59393	-0.60234	-3.30647	-1.74289	-2.17374	-1.88366	-1.95532	-0.556292	-2.84847	-1.89096	1.04443	-2.90632	-4.21358	-0.581796	-0.058059	-1.25366	-4.39137	1.43477	-0.606636	-2.11451	-9.96578	-2.45279	-0.999249	-2.87408	-0.352028	-1.29504	-0.616166	-0.95895
Gardnerella vaginalis	-4.64213	-1.01769	-2.45229	-1.76665	-3.30968	-1.72964	-2.11081	-1.33275	-3.93691	-3.2514	-1.72307	-2.79951	-2.68992	-2.77008	-2.44328	-9.96578	-3.54208	-4.04931	-3.78501	-3.19914	-1.62916	-1.01479	-9.96578	-3.30647	0.101617	-9.96578	-2.26058	-2.21723	-1.94517	-2.84847	0.105026	-2.11991	-2.17369	-4.21358	-1.45447	-9.96578	-0.518068	-2.09387	-0.821948	-2.40851	-9.96578	-3.55563	-4.74346	-1.22116	-0.712402	-3.91688	0.48672	-1.46239	-1.7642
Gemmata obscuriglobus	9.65692	10.0045	9.3189	9.38666	9.70627	9.71188	9.5115	9.53379	9.62813	9.32608	9.21647	9.14661	8.41449	9.14086	9.19181	8.57066	8.97896	9.4098	9.293	9.75657	9.61014	9.53731	9.27306	9.56869	8.3343	9.44041	8.6848	8.48012	9.39121	9.51057	7.66903	9.69837	9.79635	9.23425	9.2165	9.49631	9.91397	9.79954	8.68895	9.01575	8.52684	8.60816	7.94869	9.33803	9.26728	9.56276	8.56836	9.2566	9.785
Gemmata sp.	0.679844	-0.0191526	3.12492	4.607	1.58332	-0.0325162	3.32603	1.12371	-1.63277	2.17806	2.69492	2.27817	-0.527254	0.221278	2.79698	0.995631	2.79877	4.30172	4.73418	1.8754	0.952076	1.06099	4.6993	3.74538	-1.06663	1.23538	0.166738	1.45464	1.61959	0.896767	0.62818	4.58122	-0.914457	1.71404	3.51898	4.62232	-0.83948	1.03816	4.60182	1.49121	-1.11764	0.335345	0.644551	0.891727	-1.87938	1.67633	0.287564	1.16654	-1.44326
Gluconacetobacter diazotrophicus	4.62523	4.83243	4.70977	5.66974	3.44426	5.10796	4.3218	4.85842	7.16431	7.97111	7.88299	8.23992	6.59652	5.97161	5.90496	7.38685	4.60598	4.22589	4.1894	4.43147	5.6363	5.91174	6.96837	7.05097	5.61688	7.59178	6.01096	7.34325	6.11268	4.37958	5.66691	5.53561	5.45063	6.02855	3.9567	5.18524	5.45947	5.48945	5.003	5.63005	7.21015	7.03973	5.86034	6.04384	4.83646	3.05003	4.29312	4.01914	5.99246
Gluconobacter frateurii	4.15119	3.70196	4.1509	4.03071	2.84607	4.29906	3.60416	4.41187	4.29356	4.38232	3.99411	4.3453	5.73122	4.6938	5.13135	6.34778	4.22245	2.93802	4.10794	3.44589	2.93134	2.30452	2.81521	2.67941	4.17598	3.91434	4.36774	4.6241	3.73237	2.56761	3.23826	3.30021	4.01758	3.3294	2.6983	2.94063	2.93291	2.53248	2.31095	2.53048	6.43063	6.15184	5.44501	5.20736	4.22391	2.944	3.67627	3.65475	3.56193
Gluconobacter morbifer	2.29896	1.61212	1.94956	2.21059	0.583797	2.09879	1.49816	2.52184	2.36303	2.80109	2.19002	2.4386	3.78466	2.62115	3.1735	4.17909	1.99596	1.28475	1.78035	1.11014	1.20829	0.457277	0.466901	1.07219	2.14984	2.67794	2.5401	2.87217	1.75014	0.229798	1.05857	1.39791	1.95766	1.1863	0.279729	0.678306	1.1128	0.826771	0.690966	0.807028	4.48415	4.19226	3.38743	3.39032	2.06985	0.816874	1.88944	1.11925	1.72318
Gluconobacter oxydans	6.21319	5.60585	6.21047	6.23295	4.76346	6.30313	5.78534	6.38302	6.62157	6.81429	6.52852	6.73539	7.62098	6.51295	6.98765	8.07765	6.39377	5.02469	6.29038	5.27944	5.7003	4.84584	5.4399	5.51211	6.32376	6.5248	6.60102	7.01446	6.42161	4.74478	6.07812	5.56033	6.26026	5.22705	4.65711	4.75213	5.63572	4.82363	5.45961	5.37718	8.34548	8.09753	7.40008	7.27067	6.08831	5.08635	5.7735	5.90346	6.16902
Gluconobacter thailandicus	2.22859	1.3019	1.8256	1.95127	0.583797	2.28823	1.90569	2.24888	2.49229	2.61767	2.40629	2.63358	3.654	2.5057	3.24016	4.0423	1.96494	0.881588	2.19528	1.24759	1.36693	0.720137	0.718273	1.38018	2.20678	2.09309	2.55547	2.76721	2.18914	0.665576	1.96204	0.781534	2.21242	1.0455	0.601419	0.748652	1.22464	0.708197	0.498449	1.33927	4.34418	4.1621	3.41226	3.21303	2.06985	1.01608	1.55435	1.82681	1.81626
Hymenobacter sp.	-0.676302	-0.170993	-0.458224	-1.50444	-0.322252	-0.0325162	-0.115496	-1.01155	-0.786762	-0.677934	-1.30922	-0.99935	-0.609594	-0.607834	0.21306	-1.49288	-0.749206	-0.611753	-0.343767	1.4885	1.45436	-0.48517	-0.7541	-0.511401	2.55264	-0.593128	0.659406	-0.45644	-0.0423556	-0.27219	0.689541	-0.539136	0.199555	-1.06764	1.68498	-1.05656	2.87238	-0.172415	2.0964	0.0446417	-1.24289	-1.5684	-2.19107	0.191773	-0.423326	-0.477391	-0.00762321	-0.201681	0.932084
Hymenobacter swuensis	-9.96578	-1.75271	-9.96578	-4.06908	-9.96578	-9.96578	-3.1046	-9.96578	-2.948	-2.67103	-3.29854	-9.96578	-3.10186	-3.18185	-3.02433	-4.46473	-9.96578	-9.96578	-2.79498	-1.20911	-2.2119	-1.86045	-1.60015	-9.96578	-0.897039	-9.96578	-3.25368	-2.94973	-2.61991	-2.84847	-0.724006	-3.11365	-2.17369	-4.21358	-2.45052	-9.96578	-0.380752	-2.41426	-0.722583	-1.67461	-9.96578	-9.96578	-4.74346	-9.96578	-3.86354	-2.34651	-2.46054	-1.78333	-3.74958
Ideonella sp.	0.130065	0.118218	0.0647349	0.607889	1.80564	0.173738	0.34351	0.472007	-0.635007	0.543139	0.495577	-0.107597	0.727876	0.469011	-0.449179	-1.68494	1.24897	0.451226	1.5174	1.69488	0.689191	0.272996	1.74639	-0.511401	1.03957	0.557677	-0.0333696	0.313258	1.27868	1.31161	0.105026	1.82841	1.02213	1.0455	0.657966	-0.183453	0.480899	0.788319	0.654463	1.56919	-0.533722	-0.570546	-1.07915	0.776315	0.923423	0.521604	0.117787	0.604962	0.232117
Klebsiella pneumoniae	1.84535	0.906154	2.6693	0.492491	1.84627	1.26617	0.407591	1.12371	-0.0996501	0.379759	0.425239	0.361457	-0.375459	0.175515	1.28641	-1.32341	1.48592	0.785427	1.14982	0.695328	1.0675	0.51382	0.881678	0.927873	0.908396	-0.441343	0.411649	-0.374088	0.509713	1.56786	0.748399	0.459815	0.924883	0.345502	0.864295	0.748652	0.886637	2.67629	1.59744	0.321931	-0.533722	-0.111699	0.218604	-0.806964	0.974022	-0.0304678	0.233162	0.119915	0.553799
Kocuria polaris	-1.09057	-1.01769	-1.64832	-2.50035	-1.32045	0.658799	-0.414695	-1.33275	-0.786762	-1.26174	-1.8924	-9.96578	-0.609594	-1.96695	-0.0346343	-1.32341	-1.55474	-0.486406	-0.994798	-1.62304	1.68874	-0.185988	0.774823	-1.31721	1.88493	-2.75546	0.659406	-1.95532	-0.556292	-0.856281	1.49651	-9.96578	0.49888	-1.42935	1.1272	-1.64002	2.60938	0.279659	2.08273	-0.828662	-1.11764	-2.24391	-1.96962	-1.48352	0.0236173	-1.35019	0.176627	-0.464384	0.553799
Kocuria sp.	-3.66025	-3.32798	-4.4288	-9.96578	-1.73429	-1.40867	-2.52378	-3.32189	-1.95358	-2.67103	-2.88705	-3.7895	-1.23642	-9.96578	-3.02433	-3.48075	-9.96578	-0.486406	-1.8	-9.96578	-1.21524	-1.37652	-1.60015	-0.996005	0.454962	-2.17374	-1.77713	-2.53748	-2.93962	-0.686646	-0.893633	-1.53704	-0.914457	-1.42935	-0.870823	-2.63553	0.991552	-1.41811	0.498449	-0.998267	-2.3763	-3.55563	-3.1845	-2.79941	-0.560636	-1.93331	-0.880884	-1.78333	-3.74958
Komagataeibacter europaeus	5.79614	5.85224	5.66782	6.11719	4.23826	5.88398	5.25584	5.3396	6.6258	7.13888	6.80615	6.80513	7.12372	7.09273	6.61495	7.89484	6.40826	4.90965	6.25973	5.28344	5.02938	4.82085	5.30239	5.93424	6.57151	6.44667	6.76978	6.74126	5.59716	4.40327	5.36464	4.99797	7.23765	8.29201	5.61842	7.4343	5.15233	5.67609	4.57522	5.5904	8.0581	7.45764	6.47595	7.02262	5.85342	4.83271	5.65564	5.94643	5.57743
Komagataeibacter hansenii	-3.08138	-0.170993	-1.13511	-0.091959	-3.30968	-2.72486	-9.96578	-9.96578	1.6412	1.49019	3.13031	1.94567	-1.52518	-0.969776	-0.86356	-0.909271	-0.749206	-9.96578	-0.802513	-9.96578	0.482878	0.205939	0.162292	1.53766	-0.819178	1.14231	-0.0333696	1.09865	0.664887	-1.85367	0.987055	0.962007	-1.91174	-0.538061	-2.45052	-2.05356	0.32901	-0.420038	-0.30814	-0.141578	1.36091	1.49391	0.862013	1.14536	-1.55851	-2.34651	-3.45262	-1.78333	-2.75931
Komagataeibacter intermedius	2.61625	2.01537	2.98292	3.33291	1.67639	3.07309	2.48311	2.89262	4.44177	4.89471	4.62782	4.75652	4.90627	4.90308	4.39858	5.6285	2.78107	2.2307	2.28273	2.51572	3.04837	2.92108	3.4224	3.70167	3.89045	4.24047	3.93422	4.48485	3.446	1.53392	3.23312	2.8282	3.6324	4.34444	2.41631	3.65021	2.76548	2.92695	3.60667	3.05972	5.85366	5.12779	4.2591	4.67035	3.20293	0.705908	2.96631	2.58698	3.03842
Komagataeibacter kakiaceti	1.53134	0.243638	1.34771	1.7143	-0.999242	1.3954	1.16898	0.664522	2.3079	2.52946	2.39713	2.40013	2.92298	2.25377	2.4071	3.45738	2.16925	-0.071874	2.26136	1.37307	0.640312	0.620663	1.74639	0.680087	1.69898	2.46385	1.74191	2.97	1.77761	-1.85367	1.19178	-0.124623	2.21242	1.84727	0.279729	1.56542	1.01663	-0.172415	0.456659	0.807028	3.62977	2.86214	2.56633	2.87721	1.70071	0.869312	1.33942	1.21232	1.18572
Komagataeibacter medellinensis	3.19806	2.74513	3.24039	3.84912	1.63061	3.45552	2.89436	2.91173	4.0296	4.16533	4.03602	3.89095	5.10491	4.51931	4.34334	5.64135	4.04843	2.54157	3.80978	2.91702	2.71236	1.98266	3.19264	1.84951	3.70524	3.98975	3.86599	5.06703	3.43742	1.22918	2.87207	2.12206	3.92841	3.79843	2.55677	3.04215	2.39662	2.23655	1.61654	2.17908	5.85653	5.07481	4.39734	4.60842	3.8089	2.36523	3.79838	3.45023	2.94532
Komagataeibacter oboediens	4.77677	4.52171	4.60594	4.99401	3.0855	4.56025	4.31347	4.15555	5.6454	6.34307	5.9948	5.83429	6.27804	6.213	5.66609	6.9899	5.30214	4.07135	5.2904	4.01645	4.21611	4.20047	4.54933	5.03238	5.44411	5.62497	5.65971	5.86777	4.62487	2.85555	4.57339	3.91829	5.99573	6.96276	4.42428	6.14013	4.03147	4.12886	3.60188	4.39338	7.15264	6.55532	5.50048	6.09892	5.00714	3.66119	4.75796	4.75478	4.66974
Komagataeibacter rhaeticus	1.05001	0.565323	1.51758	2.19222	0.48433	1.3954	1.13153	0.986268	2.49229	3.04785	2.67232	2.77558	3.30651	2.75941	2.37356	4.05004	2.32394	3.18416	3.68693	0.373623	1.33657	0.85756	1.46638	1.48706	2.32295	2.61004	2.65397	3.11962	1.5255	0.390133	1.47924	1.51816	2.4754	2.96904	1.08657	2.13716	0.859172	0.900731	1.06927	1.18931	4.09525	3.37582	2.53954	2.95888	1.54207	-0.766451	1.46275	1.01976	2.03859
Komagataeibacter xylinus	3.47127	3.19677	3.81602	4.35366	1.96172	3.75753	3.14989	3.29312	5.82875	6.52108	6.17238	6.2924	5.46442	5.51699	4.90351	6.21474	4.13458	2.77231	3.60448	3.43154	4.12578	4.28818	4.9684	5.37271	4.75536	5.97963	4.92039	6.09619	4.74106	2.89619	4.5956	3.85118	4.50074	5.49584	3.26054	4.56986	3.95893	3.92242	3.22005	4.14104	6.5255	5.80346	4.8136	5.36047	4.18685	2.25129	3.88474	3.37171	4.44527
Kozakia baliensis	1.18001	1.11755	1.58467	1.7143	-0.152527	1.90981	0.928093	1.79331	2.57245	3.25851	2.7535	3.06095	3.80467	2.94133	3.20245	4.4689	0.834139	1.48171	1.05365	1.24759	1.58924	1.06099	1.74639	1.96496	2.44631	2.61004	2.47691	2.79417	2.06084	-0.156846	1.68909	0.874591	2.12755	2.7483	0.815413	1.78216	1.55075	1.33349	1.01272	1.50715	4.76599	3.87035	3.10627	3.15646	1.81616	-0.477391	1.26002	1.11925	2.1854
Lactobacillus brevis	8.51615	8.26525	8.05254	7.6813	4.36251	4.23719	7.78079	5.04303	6.77258	8.21861	8.85608	7.94028	7.96542	9.94823	7.66866	7.40657	4.84194	5.05336	6.40931	6.39304	5.43607	5.47774	6.0379	7.80137	7.46125	6.93175	8.20864	7.97154	9.28236	8.99422	8.52075	10.0883	7.45569	8.73508	7.41092	8.1939	7.27851	7.1747	6.99295	8.16423	11.6993	10.4637	11.5189	10.2909	9.18928	7.69825	9.24692	9.55266	8.71974
Lactobacillus fabifermentans	2.29896	1.97975	2.32144	2.15475	0.262109	-3.71536	0.20612	-0.0130035	-0.313528	1.02091	0.312852	1.27847	2.71881	3.87835	1.48796	2.63257	3.33597	0.320082	2.12604	1.54293	-2.62471	-0.863075	-2.3342	-0.996005	-1.48066	-2.17374	-1.19381	-0.151963	0.298368	-1.04855	-0.893633	0.682058	1.56444	3.59873	1.815	2.84753	0.246616	-0.719153	0.0134304	-0.355449	4.89608	3.43307	4.65413	2.72989	1.92304	0.705908	2.74116	3.55167	2.20848
Lactobacillus fermentum	1.92168	1.18165	1.03235	0.814214	-0.736688	-0.924337	0.0542556	-0.526953	-0.372347	-0.093741	-0.436378	0.27906	0.793426	2.09074	0.719651	0.633268	1.44154	-0.611753	0.283618	0.695328	0.911456	-0.48517	-0.224334	-0.149288	0.659181	-0.762781	-0.0960398	-0.0208578	1.37175	0.534419	0.659187	0.781534	2.14204	1.1863	0.601419	0.94119	2.56757	2.27877	3.08941	1.965	3.61631	2.24779	2.95902	1.74553	0.923423	-0.766451	1.48621	1.79707	0.691214
Lactobacillus kisonensis	1.02254	-0.170993	0.348282	-0.920839	-1.73429	-3.71536	-0.208501	-9.96578	-0.70889	-0.677934	0.626733	-0.000792679	0.301911	1.92086	-0.449179	-0.909271	-1.55474	-4.04931	-1.8	-1.62304	-0.893983	-2.18107	-3.90469	-0.996005	0.101617	-0.762781	0.60134	-0.842855	1.58891	0.534419	0.564092	1.68161	0.356966	0.714479	-0.0419023	0.356603	0.859172	-0.172415	-0.54229	-0.355449	3.55177	1.8371	3.07552	1.74553	1.47338	-0.477391	1.36494	1.38217	0.553799
Lactobacillus plantarum	8.51461	8.56585	8.47293	8.22646	6.24582	3.77347	6.62863	6.33074	6.16173	7.53732	6.16295	7.14243	9.00724	10.0413	7.97127	8.9846	9.59804	7.02794	8.68306	8.09418	3.04837	5.4724	4.21828	5.98755	3.80389	4.38966	3.3176	5.36254	3.686	3.88939	3.323	4.47378	7.45424	9.94095	7.48018	9.2864	5.64581	5.03135	5.40022	6.29234	11.0973	9.76514	10.8145	8.79066	7.95412	7.01319	8.51787	9.47247	7.93609
Lactobacillus rhamnosus	1.92168	2.41262	2.30827	2.01538	-0.152527	-2.14308	0.20612	-0.164845	-0.869077	1.28997	-0.0383003	0.714849	2.83232	3.79	1.63678	2.51453	3.18264	0.451226	2.14949	2.03583	-0.129553	-1.18435	-1.92099	-0.996005	-0.0237917	-2.17374	-1.12685	-0.374088	-0.778331	-1.27045	-0.724006	-1.53704	1.45258	3.58607	1.16671	3.04215	1.60136	0.102936	0.227358	-0.298936	4.68878	3.25401	4.40972	2.58307	1.89705	0.762458	2.50903	3.26713	2.11386
Lactococcus lactis	9.754	1.05047	6.14529	1.46162	1.88579	0.725872	0.132185	0.472007	2.88651	0.195486	2.73181	0.361457	6.33899	-0.0236049	6.94261	-1.49288	-0.556864	1.65499	-0.632867	0.788382	8.56788	0.135612	3.3025	0.767497	5.77978	1.14231	0.659406	-1.22059	7.77059	-0.156846	0.689541	0.459815	9.78015	0.930086	4.48415	1.05661	10.0546	0.334063	1.59744	0.20955	-1.11764	2.4388	-0.972448	0.65086	-0.712402	0.585691	-0.379165	1.01976	0.232117
Leuconostoc carnosum	-1.674	-9.96578	-2.13194	-3.08124	-9.96578	-9.96578	-9.96578	-9.96578	-3.35933	-1.93774	-4.85538	-9.96578	-2.68992	-2.77008	-2.44328	-9.96578	-3.54208	-4.04931	-2.79498	-9.96578	-0.51609	-4.16158	-9.96578	-9.96578	-2.47664	-9.96578	-3.25368	-3.52913	-1.77586	-1.53279	-1.72162	-9.96578	0.0228409	-1.91322	-1.23264	-3.62659	0.368508	0.533224	-1.16918	-2.67001	-2.3763	-2.56413	-2.77274	-3.7894	-2.87408	-3.91688	-2.87294	-2.77837	-3.74958
Leuconostoc pseudomesenteroides	1.82959	-0.533099	0.447742	-0.391165	0.377494	-0.0325162	0.741785	0.834346	0.28993	-0.562634	1.54567	1.23542	-0.696919	-1.96695	0.665237	0.259148	-0.971194	-2.48036	0.588246	-0.40319	0.589719	-1.37652	-0.0181082	-0.319013	-0.979343	-1.177	-0.265772	-0.296184	0.138042	0.0493901	-2.08284	0.0451274	2.05279	-1.91322	-0.870823	-0.642271	2.38703	2.49715	-0.382047	-0.750795	-1.70104	-2.24391	-1.60831	-0.806964	-1.0743	-1.12832	-0.296808	-0.201681	-1.18087
Luteipulveratus mongoliensis	-0.153442	-0.340715	-0.288519	-0.284384	-1.32045	0.436559	-0.0281248	-0.334568	-0.786762	-0.093741	-1.57154	-2.79951	-0.112736	-1.60564	-0.86356	-1.90656	-0.749206	-0.164882	-1.21671	-0.625264	1.03004	-1.37652	-0.60234	-2.31362	1.87326	-0.955077	0.456011	-1.73372	-0.778331	-0.397562	1.47924	-2.11991	1.19893	0.00876551	1.24262	-0.642271	1.85877	0.0388669	1.98322	-0.606636	-0.895696	-1.11014	-2.77274	-0.999249	0.639795	0.0625495	0.390576	-0.201681	0.401906
Mesorhizobium sp.	1.89164	1.18165	-0.210609	0.861493	1.13603	2.28823	0.928093	1.18781	1.46761	0.4363	0.562645	1.32027	1.18402	0.506459	0.357331	0.713388	1.08555	1.05659	1.36545	1.64599	1.91107	0.767414	0.829239	1.26475	1.27079	0.557677	0.411649	0.499531	2.06084	1.49917	2.35189	0.781534	2.59613	0.667203	1.38343	0.815727	2.72801	2.62266	1.79482	1.28484	0.849652	-0.663512	-0.257349	1.361	2.18171	1.06186	0.780262	1.16654	2.88929
Metarhizium brunneum	7.62032	8.20001	8.88326	8.7981	7.99675	7.25284	9.92605	8.03267	7.10995	7.45633	8.5541	8.8533	6.0193	6.94627	8.0377	6.65218	7.299	7.56279	8.915	7.79598	7.50848	7.65865	8.23373	8.10808	5.94299	7.10129	6.49506	6.95845	7.4629	7.50798	6.35044	9.22087	7.82233	7.45028	8.35723	8.56524	7.7518	7.33959	8.70549	7.62662	6.07318	6.42874	5.7863	7.07926	6.81142	7.93615	7.09184	8.42024	7.22949
Methylobacterium extorquens	-1.09057	-0.170993	-0.997891	-0.631829	-0.999242	-0.924337	-0.0281248	-0.748999	-3.93691	-1.93774	-1.72307	-0.637421	-0.696919	-0.0779962	-0.71182	-1.68494	-1.23366	0.627982	-0.802513	-0.0410435	1.33657	-0.0986216	-0.7541	-0.996005	0.975475	0.323385	0.0266911	-0.842855	0.778029	1.14176	0.274802	-0.539136	0.586282	0.345502	0.957355	-0.058059	0.0662056	-0.332689	0.923494	0.392265	0.0505438	-0.400859	-2.45279	-0.222843	0.974022	0.968795	0.889825	0.912902	1.62367
Methylobacterium sp.	0.077646	2.65769	0.348282	0.0777951	1.26151	0.514506	3.22295	1.87346	-0.497708	2.33499	-0.895078	2.27817	0.256145	3.49163	0.357331	1.28501	1.08555	3.15559	0.950603	3.87511	2.4821	3.5472	0.659416	1.53766	1.71215	3.34344	1.3769	3.06162	1.5255	4.74107	1.46176	4.41303	1.62761	4.41052	1.95698	2.46426	1.24601	3.51479	2.50795	3.74042	1.65227	2.35833	-0.532621	3.50352	1.07019	4.12734	2.8171	-0.201681	1.69077
Microbacterium sp.	-0.588975	-0.0191526	-1.45624	-0.631829	-0.514639	-0.0325162	-0.208501	-1.01155	-1.49567	-1.67563	-1.72307	-0.807065	-0.609594	-2.77008	-0.449179	-1.32341	-0.749206	-0.749036	-0.802513	-1.62304	0.782245	-1.18435	0.244683	-0.996005	1.40662	-3.74575	-0.128426	-1.37222	-0.489274	-0.397562	0.689541	0.196991	-0.0412249	-1.42935	0.864295	-1.31899	1.89979	0.223123	1.45613	-0.0927219	-1.24289	-1.76044	-3.1845	-0.63732	0.639795	-1.93331	-0.0746683	-0.616166	-0.445218
Nora virus	0.276778	0.980116	1.42297	4.38231	4.02476	2.70873	4.20495	3.15563	4.22081	-2.67103	0.495577	2.68249	3.21379	0.680373	5.20472	4.17556	0.442074	2.17486	3.90242	2.18018	1.03004	-0.48517	1.56588	0.380735	-0.161149	-0.762781	3.93814	4.10525	2.97426	1.53392	-0.194225	4.86254	5.28089	7.20959	1.8639	7.13274	4.4595	11.3771	9.70074	10.6195	6.45541	1.20929	2.18347	2.80543	5.4214	-3.91688	0.48672	4.94306	1.31893
Paenibacillus borealis	-0.676302	0.243638	-0.551201	-0.091959	-0.514639	0.436559	1.30979	1.47149	-0.202629	-0.803255	0.562645	0.4394	-2.10806	-1.60564	0.549836	0.548435	-0.235361	0.175814	1.40497	1.37307	-0.893983	-0.0986216	1.20345	1.00184	-0.482673	-0.0632832	-0.417582	0.210251	0.179825	-0.27219	-0.309564	2.00345	-0.5001	0.714479	0.71238	0.678306	0.0662056	-0.250328	0.176776	-0.141578	-0.244595	-0.570546	-0.873101	0.0987482	-0.297956	-0.0304678	-0.765611	0.300331	0.624142
Paenibacillus sp.	0.40994	0.465857	0.628189	0.431135	0.262109	-0.0325162	0.971139	0.664522	-0.00353447	-0.356468	0.495577	-0.000792679	-0.112736	0.712774	0.871567	0.259148	-0.235361	0.571436	0.655317	1.03618	1.56325	-0.600478	0.932277	1.26475	1.69898	-0.0632832	0.837637	0.455169	1.13739	0.534419	0.314298	1.33381	1.19893	0.345502	1.83966	1.05661	3.08884	0.748814	2.77775	-0.0927219	0.909741	-0.322957	-0.610507	0.513449	0.816566	0.968795	0.991651	0.797489	1.03895
Pectobacterium carotovorum	7.62518	7.88327	9.34745	10.0746	9.41678	7.02879	10.0494	9.08542	7.94565	9.74611	8.88473	8.68627	6.50227	7.27194	9.55845	9.73007	10.1714	10.8407	11.6758	9.36143	7.05754	7.68428	11.0206	10.3706	7.55286	7.36406	6.80638	8.79188	10.0524	7.38488	7.59128	11.7941	6.59591	7.8604	10.3643	10.3329	7.26778	7.43252	12.7133	9.75993	6.80356	7.38623	6.3246	9.01647	7.68184	9.12776	7.5255	8.37849	6.57963
Plasmodium vivax	9.79599	10.1569	9.32402	9.65585	10.0306	9.81475	9.53791	9.41704	9.52464	9.52086	9.25722	9.05595	8.96163	9.27057	8.9139	8.35539	9.81401	9.65857	9.44542	9.21879	9.02175	9.57507	9.34821	9.56964	8.2496	10.0584	7.92812	8.6253	9.00474	9.40555	7.2378	10.045	9.02118	9.37871	8.95309	9.52791	9.17213	9.36542	8.77262	8.50019	8.29003	8.94277	7.56555	8.41301	9.34353	9.61276	8.01355	9.02287	9.49782
Podospora anserina	7.43286	7.79701	7.57391	7.78992	7.63595	7.2726	8.17986	7.54397	7.36248	7.41999	7.49698	7.34207	6.39285	6.99443	7.07829	6.44044	7.12489	7.52513	7.87137	7.19376	7.69617	7.53262	7.62285	7.53406	6.43618	7.31826	6.26973	6.28861	7.2295	6.9913	5.71381	7.92909	7.41971	7.15388	7.51838	7.93856	7.61866	7.65952	7.28627	6.70147	6.46232	6.6386	5.83026	6.77455	6.99949	7.53792	6.74157	7.24168	7.47704
Propionibacterium acidipropionici	-2.6694	-0.170993	-2.8647	-1.09042	-0.514639	-0.732034	-1.52793	-2.32912	-2.6283	-0.803255	-2.30565	-9.96578	-1.52518	-3.76028	-1.44721	-1.32341	-1.96837	-2.06733	-9.96578	-2.20578	0.175001	-1.01479	-0.923721	-3.30647	0.764087	-2.75546	-0.729061	-1.95532	-0.860648	-0.856281	0.80495	-9.96578	-0.5001	-1.91322	-0.581796	-0.834594	-0.518068	-1.83186	0.498449	-1.09118	-3.68704	-9.96578	-9.96578	-1.22116	-2.87408	-0.614694	-0.658871	-0.978104	0.319508
Propionibacterium acnes	1.71415	3.2122	2.84377	3.05642	3.67606	1.75785	1.5273	3.41863	1.78271	1.22726	2.51188	3.79043	2.19587	1.41041	2.35649	2.20381	1.83373	2.75971	2.07795	2.3114	2.93134	2.35181	2.59734	3.42079	3.81309	1.90758	1.53001	3.25517	2.16853	3.291	3.8351	4.10271	2.1706	2.7483	2.88754	1.67785	2.26676	2.83562	3.23248	2.58405	1.27214	1.74967	0.388391	2.21319	2.06985	2.63126	2.43865	2.8701	3.08904
Pseudodonghicola xiamenensis	1.76476	2.51569	7.84015	9.24134	5.61555	2.47528	7.35259	6.81718	0.211993	3.2268	7.38707	6.41443	1.02937	1.50595	7.17274	6.25796	4.89639	6.62011	9.14334	7.14181	3.32071	3.85139	8.52114	6.72632	1.63125	1.55719	4.12489	6.41847	6.35364	3.47215	5.05792	9.4401	0.668691	1.71404	8.17033	7.60756	1.85877	1.86383	11.1501	6.20893	0.58063	1.78528	4.57498	4.96205	1.94857	3.33743	5.72997	6.5549	0.232117
Pseudomonas fuscovaginae	-1.674	-3.32798	-1.45624	-1.50444	-0.999242	-2.72486	-2.52378	-0.748999	-3.93691	-1.93774	-3.87642	-2.79951	-2.10806	-2.45013	-1.44721	-1.90656	2.02633	-1.74661	-1.8	-2.20578	-0.409322	-2.18107	-1.60015	-1.73105	-0.367351	-2.75546	-1.5851	-2.53748	-0.700459	-1.85367	-1.19258	-0.124623	-1.49806	-3.22702	-0.719083	-1.31899	0.516497	-1.09695	-0.722583	-1.67461	-4.66857	-2.97633	-4.74346	-9.96578	-1.29618	-1.61249	-1.29504	-2.19671	-1.44326
Pseudomonas moraviensis	-1.35299	-3.32798	-0.997891	-1.76665	-0.999242	-0.732034	-0.655354	-0.0130035	-1.63277	-1.67563	-1.57154	-0.637421	-1.88656	-2.45013	-0.86356	-1.32341	3.61106	-1.48439	0.366014	-1.62304	0.426336	-0.600478	-0.339671	0.139928	1.23474	-2.17374	-0.195465	-2.94973	-0.860648	-0.686646	0.14938	-0.539136	-0.252495	-0.0691573	-0.0419023	-3.62659	1.63413	-0.0984962	0.539062	-0.0454659	-2.69636	-1.39896	-2.77274	-1.80444	-0.882032	-1.61249	0.532492	-2.19671	0.0396474
Pseudomonas putida	1.43045	1.46533	1.18428	1.29941	1.80564	0.514506	0.584343	1.41904	0.656448	0.195486	0.529501	1.27847	0.256145	0.430565	-0.0346343	-0.0360342	4.02606	0.320082	1.58777	1.1805	1.104	0.620663	1.53347	0.680087	1.37385	1.32281	0.139795	0.499531	1.25932	0.0493901	0.0592656	1.8742	0.30638	0.345502	0.657966	0.164119	2.5505	2.02133	1.53857	0.976861	-0.895696	-0.570546	-0.257349	0.776315	1.02291	1.34714	1.36494	1.01976	0.232117
Pseudomonas sp.	0.814065	1.11755	0.826009	0.155726	-0.152527	0.588456	0.790665	-0.0130035	-0.257013	0.0581081	0.147933	0.4394	0.109433	-0.318727	0.488478	-0.909271	3.77203	0.627982	-0.103041	0.248193	1.27386	-0.0162453	0.0749099	0.487571	1.73813	-0.593128	1.05511	-0.151963	0.335813	0.534419	1.47924	1.04443	0.890954	-0.0691573	1.51171	-0.058059	3.02848	1.2225	1.77796	0.321931	-0.381928	-0.984869	-1.19437	-0.348221	0.816566	-1.12832	1.11712	0.604962	0.932084
Pseudomonas stutzeri	-0.588975	-0.533099	-0.458224	-1.50444	-1.32045	0.35416	-0.414695	0.249788	-1.63277	-1.26174	-0.725451	-1.48362	-1.37359	-0.969776	-0.574531	-1.17176	3.77203	0.0978825	0.719407	-0.625264	0.367487	-0.0162453	-0.60234	0.26535	1.28849	-0.593128	0.47769	-1.95532	-0.700459	-0.27219	0.426686	0.0451274	-1.32859	-1.23719	0.657966	-1.64002	2.27718	1.2225	1.04127	-0.0927219	-1.24289	-1.76044	-1.96962	-1.22116	-0.882032	-1.12832	0.176627	0.119915	-0.445218
Pseudomonas syringae	-1.21582	-1.01769	-1.13511	-9.96578	-2.31685	-1.72964	-1.11393	-0.526953	-3.35933	-2.25829	-2.88705	-2.79951	-2.36986	-3.18185	-1.03316	-3.48075	2.48566	-1.48439	-1.8	-2.20578	-0.409322	-1.86045	-2.91553	-3.30647	0.546045	-2.17374	-0.729061	-2.94973	-0.947947	-1.53279	-0.724006	-2.11991	-1.17695	-2.23379	-0.0419023	-2.63553	1.22464	-1.6102	0.369262	-1.1905	-1.89301	-2.56413	-2.77274	-2.2178	-1.55851	-1.61249	-0.765611	-3.76851	-0.307893
Psychrobacter glacincola	0.531842	1.70229	4.05558	5.87375	2.74225	1.3536	4.63789	3.13951	0.211993	2.11017	3.77477	1.99812	-1.52518	-1.31693	2.09351	2.21761	0.834139	2.17486	3.18381	2.76504	-0.216917	2.00255	3.41352	2.74549	-0.312972	-0.304017	0.47769	1.06951	2.0383	0.0493901	0.314298	5.15925	-1.32859	1.48784	3.32308	5.52793	0.288401	-0.513019	6.49228	3.18388	0.339797	1.80276	0.772797	3.06105	-1.29618	-0.0304678	1.94126	2.55179	-0.0671599
Psychrobacter sp.	0.0232508	-0.170993	1.64878	-0.091959	-0.999242	-0.924337	-1.11393	-2.32912	-2.6283	-1.0922	-1.43443	-1.80454	-0.112736	-0.969776	-0.449179	-4.46473	-1.23366	-1.26257	-0.481088	-2.20578	0.104676	-2.59393	-1.11598	-2.31362	1.01852	-9.96578	-0.00302674	-1.73372	-1.94517	1.97436	-0.194225	-0.801751	-0.593073	-4.21358	1.08657	-1.05656	0.886637	1.97072	1.01272	-0.676915	-2.3763	-3.55563	-2.45279	-2.2178	-0.423326	-2.92781	0.817715	-0.201681	0.0396474
Rhizobacter sp.	-1.21582	-1.33889	-1.28676	-1.50444	0.136688	-1.40867	-0.307918	-1.01155	-2.14543	-1.0922	-1.43443	-0.485642	-0.609594	-0.690167	-0.227068	-1.49288	0.442074	-1.07036	0.196229	0.248193	-0.409322	-1.18435	0.244683	-1.31721	0.0192339	-0.593128	-1.49789	-0.958116	-0.194194	-0.856281	-1.72162	0.196991	-0.914457	-0.331889	-4.01979	-1.64002	-0.380752	-0.719153	-0.928667	-0.606636	-2.69636	-1.98202	-1.77768	-1.48352	-1.0743	-0.352028	-0.765611	-0.616166	-0.95895
Saccharomyces cerevisiae	8.66791	6.74891	7.18816	7.51846	5.70388	7.16342	7.69312	8.40171	7.01704	8.67695	6.53166	6.713	5.31619	7.69679	6.43151	6.24791	5.27394	9.6841	5.97799	8.39257	7.39428	8.39687	6.11932	9.66858	6.12451	6.68702	5.39928	8.42459	7.62316	7.1298	5.15357	8.3006	9.44074	7.49497	6.57868	7.31983	9.40475	5.0819	6.76208	6.81784	5.65404	8.79391	3.91443	7.14035	4.58297	7.06047	6.79888	6.32936	7.47764
Sphingomonas hengshuiensis	-2.0875	-2.33524	-2.13194	-3.08124	-1.73429	-1.72964	-9.96578	-3.32189	-3.93691	-3.2514	-2.88705	-1.80454	-2.68992	-3.76028	-2.03021	-4.46473	-1.96837	-1.74661	-0.994798	-1.20911	-1.40741	-2.18107	-0.60234	-3.30647	-1.06663	-3.74575	-2.77219	-4.51257	-1.36206	-0.534876	-1.5701	-1.12305	-0.412757	-1.6511	-1.04042	-9.96578	-2.83176	-1.24861	-0.722583	-1.41234	-9.96578	-2.56413	-3.76292	-3.7894	-3.86354	-1.35019	-1.6566	0.736124	-1.44326
Sphingomonas parapaucimobilis	-1.21582	-1.33889	-1.28676	-3.08124	-1.32045	-2.72486	-3.1046	-9.96578	-1.78427	-1.93774	-1.57154	-3.7895	-2.36986	-2.45013	-4.01264	-2.48882	-1.55474	-1.26257	-0.802513	-1.20911	-1.04569	-4.16158	-0.465036	-1.73105	-0.979343	-9.96578	-2.1237	-1.08339	-1.94517	-2.84847	-1.43298	-1.53704	-1.32859	-1.06764	-2.45052	-2.63553	-2.25022	-2.82674	-1.62739	-1.8261	-4.66857	-2.56413	-2.45279	-0.806964	-1.55851	-2.92781	-2.46054	0.604962	-1.18087
Sphingomonas phyllosphaerae	-1.50458	-2.33524	-0.872601	-0.920839	-0.736688	-1.72964	-1.79013	-1.74658	-2.948	-1.67563	-1.72307	-1.48362	-1.69458	-1.96695	-0.574531	-2.48882	-2.55051	0.249751	-0.994798	-1.20911	-0.216917	-1.18435	-0.224334	-1.31721	-0.260569	-2.17374	-1.41566	-1.73372	-0.700459	-0.156846	-0.370887	-1.53704	-0.17858	-1.91322	-0.456445	-0.834594	-1.13844	-0.513019	0.456659	-0.750795	-1.38005	-2.97633	-3.76292	-1.48352	-1.87938	-1.61249	-1.87823	1.01976	-0.307893
Sphingomonas sp.	-1.86599	-2.33524	-2.45229	-3.08124	-0.999242	-2.72486	-2.52378	-3.32189	-4.91498	-4.23773	-2.88705	-9.96578	-3.10186	-2.77008	-1.70946	-2.90117	-1.55474	-1.07036	-1.8	-1.62304	-1.04569	-9.96578	-0.0181082	-1.73105	-1.25884	-2.17374	-2.26058	-1.73372	-2.13702	-2.84847	-2.56582	-0.801751	-1.03974	-3.22702	-1.23264	-1.64002	-1.8369	-2.41426	-0.821948	-3.40087	-2.69636	-2.97633	-3.76292	-3.7894	-2.29264	-1.61249	-4.43691	-0.201681	-3.74958
Sphingomonas wittichii	-2.0875	-1.33889	-3.44442	-1.76665	-2.31685	-3.71536	-2.52378	-1.74658	-2.36675	-1.93774	-2.88705	-1.48362	-2.36986	-2.18841	-1.44721	-2.90117	-0.387175	-2.06733	-0.481088	-2.20578	-2.2119	-2.59393	-0.923721	-1.73105	-0.745305	-3.74575	-2.1237	-2.53748	-1.24687	-2.26697	-2.08284	-1.53704	-1.91174	-3.22702	-3.03154	-1.31899	-2.83176	-2.09387	-0.54229	-1.29716	-3.68704	-2.24391	-3.1845	-2.2178	-9.96578	-3.91688	-1.6566	-0.327061	-1.18087
Sporolactobacillus terrae	-0.97533	1.35846	-0.0663783	-0.00458665	-2.31685	0.588456	-0.208501	-1.74658	-0.372347	1.64215	0.910359	-0.107597	-0.375459	1.22066	-0.333854	-0.325212	-1.96837	1.01479	-1.47908	-0.0410435	0.537287	0.85756	-1.33785	-0.996005	0.975475	-0.955077	0.47769	3.99337	-0.091214	-0.050046	0.659187	-0.801751	0.820603	0.40435	0.864295	-0.058059	1.40641	3.52067	1.70844	0.807028	-1.53164	-0.869612	2.33659	-2.2178	-0.712402	3.02713	0.287564	0.460672	-0.0671599
Staphylococcus aureus	-0.868618	-2.33524	-1.45624	-4.06908	-0.736688	-1.14627	-3.1046	-2.32912	-2.948	-4.23773	-1.8924	-9.96578	-1.88656	-2.77008	-2.03021	-9.96578	-3.54208	-1.48439	-1.21671	-3.19914	-1.21524	-1.01479	-0.60234	-9.96578	0.0610134	-3.74575	-1.67792	-1.95532	-2.61991	-0.856281	-1.30778	-0.124623	-1.17695	-4.21358	-0.34112	-1.64002	2.13554	-0.612408	-0.382047	-0.910974	-2.3763	-3.55563	-3.1845	-9.96578	-9.96578	-1.93331	-1.6566	-1.78333	-9.96578
Staphylococcus epidermidis	1.4512	1.3019	0.7106	-0.920839	1.13603	0.35416	0.527798	0.472007	-0.433666	-1.67563	0.190964	-0.485642	0.301911	-0.870429	-0.127645	-0.325212	-1.96837	1.01479	0.103203	0.110811	1.4258	0.337074	0.466901	0.767497	2.11059	-1.76034	0.269742	0.0993194	-0.700459	0.842349	1.23358	1.04443	0.856207	0.804624	1.31474	-0.834594	3.1749	1.70776	1.90769	1.22828	-0.703386	-0.663512	-1.45674	-0.485541	0.204023	0.149931	0.74181	-0.201681	1.31893
Staphylococcus gallinarum	2.72249	-1.01769	-0.872601	-1.76665	-3.30968	-0.924337	-2.52378	-3.32189	-1.95358	-3.2514	-2.56726	-2.2179	-1.23642	-3.76028	-0.574531	-2.90117	-1.96837	-1.26257	-2.79498	-0.887853	1.73603	-9.96578	-0.339671	-9.96578	0.738567	-0.955077	-1.12685	-1.73372	0.138042	-2.84847	-1.72162	-1.12305	1.60686	-1.6511	-0.0419023	-2.63553	3.20794	-0.513019	-0.722583	-1.09118	-3.10828	-2.97633	-4.74346	-1.80444	-9.96578	-2.92781	-1.29504	-0.978104	-2.17761
Streptococcus pneumoniae	7.77158	7.68882	9.99531	10.0506	7.79034	7.3256	10.6526	9.84647	7.44038	6.35411	9.35646	8.91151	8.09922	6.53237	10.2599	9.07434	6.96654	7.48695	11.1818	10.5145	8.31279	6.58387	10.7498	9.65289	7.54069	7.60274	8.58581	8.52742	7.45388	7.98307	8.07882	11.6425	7.78153	7.31688	9.93121	10.7681	8.27233	8.17329	9.97813	9.44153	7.83585	6.77162	8.5311	9.25053	8.26696	6.67221	8.71931	9.29501	7.93955
Streptococcus salivarius	1.02254	-0.0191526	0.7106	-4.06908	-0.000684367	-0.732034	-1.11393	-0.526953	-1.25529	-1.26174	1.0802	0.27906	0.00262074	-2.18841	-0.574531	-2.48882	-1.55474	-0.071874	-0.218389	-0.210783	0.952076	-0.863075	-2.3342	0.26535	0.712587	-0.955077	-0.831978	-2.21723	0.0506609	1.78538	0.14938	0.0451274	1.5858	0.284151	1.00173	-3.62659	2.34804	4.79967	0.923494	-0.539622	-2.11451	-0.984869	-3.76292	-9.96578	-1.29618	-2.92781	-0.466511	-0.616166	-0.95895
Streptomyces griseoflavus	7.09248	7.44537	6.93748	6.94269	7.11475	7.08416	7.22836	7.1911	6.91658	6.96001	6.87621	6.59875	5.55934	6.34547	6.44267	5.91882	6.56127	6.84623	6.93476	6.79599	6.88274	7.1539	6.96458	7.12421	5.62037	7.11513	5.97617	6.00585	6.55509	6.56948	4.95235	7.41394	6.9496	6.81538	6.67943	6.93669	6.99636	6.93064	5.83169	6.0663	5.76901	6.29306	5.39731	6.32238	6.16245	7.14333	5.92276	6.65362	6.88911
Streptomyces pristinaespiralis	6.82821	7.34921	6.54894	6.50457	6.77267	6.57506	6.72058	6.61199	6.68153	6.58812	6.44655	6.26991	5.18648	6.1027	5.84808	5.39942	6.02035	6.34131	6.3624	6.6471	6.56196	6.84512	6.45618	6.72359	5.13374	6.48863	5.28942	5.39373	6.27991	6.53129	4.72762	6.94796	6.8198	6.43008	6.0949	6.45878	6.93191	6.68657	5.49359	5.7395	5.18	5.64893	4.76816	5.96037	5.83472	6.80769	5.46669	6.44773	6.59175
Streptomyces sp.	4.38216	4.43888	2.67957	2.62098	4.96139	4.44554	2.80201	2.39181	3.94781	3.90481	3.39699	2.60004	3.87827	4.40498	2.456	1.591	4.1276	3.66143	2.67093	2.62067	4.25316	4.27597	2.26366	2.82914	3.71836	4.31166	2.44975	4.59117	2.92597	3.82771	2.57966	2.26642	3.8063	4.12143	3.57144	2.18868	2.9783	4.64148	3.30493	3.26578	2.58912	2.9432	2.65222	1.99823	4.51625	4.31863	2.071	2.78176	3.88204
Terriglobus roseus	-1.86599	-9.96578	-3.44442	-2.50035	-3.30968	-9.96578	-4.09224	-9.96578	-2.948	-9.96578	-3.29854	-2.2179	-9.96578	-4.74086	-9.96578	-2.90117	-9.96578	-9.96578	-3.78501	-9.96578	-2.2119	-9.96578	-3.90469	-9.96578	-2.73807	-9.96578	-1.9987	-2.53748	-1.14019	-1.53279	-2.88561	-3.11365	-1.91174	-4.21358	-1.71671	-9.96578	-1.37888	-3.40659	-1.45796	-3.40087	-4.66857	-9.96578	-3.76292	-3.7894	-3.86354	-9.96578	-2.87294	-1.46239	-3.74958
Tremella mesenterica	8.12674	8.11484	11.5795	12.0115	10.6289	8.08455	13.158	11.5599	6.45658	10.1879	11.3275	11.3897	6.40208	8.29536	10.5038	9.07919	11.2197	13.1114	12.1398	10.2647	8.14992	7.85984	10.9196	10.6222	7.2472	8.39559	8.10166	8.38097	9.01442	9.0249	8.74878	12.3682	7.70549	8.34695	10.7349	13.5649	7.70025	7.58717	11.5363	10.3918	6.95516	7.36873	8.42499	9.31383	7.28085	11.0587	10.1787	11.3677	8.11162
Xanthomonas sp.	-0.588975	-3.32798	-0.650586	-1.76665	-0.514639	-1.72964	-2.11081	-1.74658	-3.93691	-3.2514	-2.30565	-2.79951	-2.36986	-2.77008	-1.22538	-9.96578	-1.55474	-3.0613	-0.994798	-1.62304	-1.62916	-1.59829	-1.33785	-2.31362	-1.25884	-2.75546	-2.77219	-2.94973	-3.35097	-2.84847	-2.08284	-1.12305	-2.49399	-1.91322	-3.03154	-2.63553	-2.02881	-1.41811	-0.722583	-1.67461	-4.66857	-3.55563	-3.76292	-3.7894	-2.29264	-2.92781	-2.46054	-1.78333	-2.75931
Xanthomonas vesicatoria	-0.868618	-0.755144	-1.86996	-0.184966	-0.000684367	-1.40867	-1.79013	-1.01155	-1.49567	-1.0922	-0.895078	-0.807065	-2.36986	-2.45013	-2.44328	-2.16852	-0.235361	-0.90077	-0.343767	-0.625264	-1.04569	-0.863075	0.322621	-2.31362	-1.36549	-0.955077	-1.88366	-1.22059	-2.61991	-0.856281	-1.72162	-0.317043	-9.96578	-2.64657	-2.45052	-0.642271	-2.25022	-0.612408	-1.16918	-0.298936	-2.3763	-2.56413	-1.96962	-2.79941	-2.87408	-1.61249	-1.29504	-0.464384	-2.17761
Yersinia mollaretii	2.3551	2.70207	1.4945	1.33334	0.48433	3.62324	1.01294	1.91192	2.82239	0.195486	0.595045	2.40013	1.02937	1.24302	1.2499	1.99527	1.68939	0.927368	1.86779	3.01654	2.33628	0.767414	1.6286	2.76686	1.10094	0.323385	0.581454	1.66402	1.29778	2.79952	0.71927	-0.539136	1.72711	0.667203	1.65751	2.6225	2.36767	3.82131	2.20135	2.70643	1.27214	1.18283	-0.458725	3.65823	2.89686	1.86892	0.991651	2.51573	2.70684
Yersinia pekkanenii	-0.217499	-9.96578	1.58467	-4.06908	-3.30968	-3.71536	-3.1046	-3.32189	-4.91498	-9.96578	-3.29854	-9.96578	-3.68064	-9.96578	-4.01264	-4.46473	-3.54208	-4.04931	-2.21336	-9.96578	-3.20523	-3.17454	-9.96578	-1.73105	-1.60582	-9.96578	-1.67792	-4.51257	-3.35097	-3.83811	-0.724006	-9.96578	-2.90632	-4.21358	-1.71671	-9.96578	-2.25022	-2.09387	-0.459945	-2.67001	-9.96578	-4.53876	-9.96578	-3.7894	-9.96578	-9.96578	-2.46054	-3.76851	-1.44326
Zymomonas mobilis	1.60727	1.46533	1.18428	2.39863	-0.999242	-1.14627	0.584343	-0.164845	3.60318	4.25057	4.11634	4.21839	-1.23642	0.265635	-1.03316	-1.03456	2.14178	-0.071874	2.21765	-0.0410435	2.60182	2.74332	2.62836	2.46081	2.86128	4.15966	3.39084	4.91154	4.0992	0.726939	4.12058	0.781534	2.1706	0.714479	0.911575	0.263569	2.21353	1.82636	1.99786	2.40851	0.58063	0.382613	-0.69284	1.04919	0.4383	0.816874	2.42658	2.47874	2.831
[truncated: 751 more columns]

## Sheet: Table S10B
Microbial Species	Sex P-value	Sex FDR	Wolbachia P-value	Wolbachia FDR	Sex × Wolbachia P-value	Sex × Wolbachia FDR	H2	Line P-value	Line FDR	Sex × Line P-value	Sex × Line FDR
Wolbachia pipentis	1.11022e-11	n/a	n/a	n/a	n/a	n/a	0.971817	2.34391e-151	n/a	0.357598	n/a
Sum of Non-Wolbachia Species	9.54681e-13	n/a	0.160941	n/a	0.837878	n/a	0.594567	3.05349e-39	n/a	1	n/a
Acetobacter aceti	0.53393	0.603144	0.786775	0.923047	0.342117	0.966045	0.765957	2.31216e-73	9.4028e-72	1	1
Acetobacter cibinongensis	0.00121229	0.00356394	0.0288541	0.35202	0.730331	0.966045	0.600669	4.21363e-46	2.57032e-45	0.999999	1
Acetobacter ghanensis	0.00107389	0.00335934	0.204204	0.534152	0.280329	0.966045	0.580721	2.77329e-43	1.25312e-42	0.999999	1
Acetobacter indonesiensis	0.0972769	0.133346	0.174507	0.534152	0.544773	0.966045	0.65214	1.1685e-58	1.29597e-57	1	1
Acetobacter malorum	0.0238925	0.042357	0.233763	0.54316	0.58372	0.966045	0.630038	2.02978e-54	1.65089e-53	1	1
Acetobacter nitrogenifigens	0.756898	0.810013	0.779641	0.923047	0.407989	0.966045	0.738867	1.47726e-69	3.00375e-68	1	1
Acetobacter okinawensis	0.00296009	0.00752356	0.0350582	0.362887	0.562351	0.966045	0.596611	1.23469e-44	6.8469e-44	1	1
Acetobacter orientalis	7.6046e-05	0.000309254	0.0258841	0.35202	0.673087	0.966045	0.613336	6.58421e-47	4.22776e-46	1	1
Acetobacter papayae	0.0293434	0.0497207	0.544019	0.790123	0.239383	0.966045	0.571621	7.82619e-42	3.2924e-41	1	1
Acetobacter pasteurianus	0.000392549	0.00145124	0.0223086	0.35202	0.803868	0.966045	0.651342	1.05043e-54	9.15371e-54	0.999998	1
Acetobacter persici	0.139915	0.177809	0.349287	0.656102	0.720898	0.966045	0.660737	2.85644e-57	2.90405e-56	0.999999	1
Acetobacter pomorum	0.0665404	0.096642	0.0232526	0.35202	0.925974	0.977708	0.665762	3.36004e-57	3.15326e-56	1	1
Acetobacter senegalensis	0.046384	0.0690103	0.088363	0.417645	0.422349	0.966045	0.683602	8.16427e-61	9.96041e-60	1	1
Acetobacter syzygii	0.00195024	0.00528733	0.0539823	0.396981	0.301573	0.966045	0.592523	2.74861e-42	1.19761e-41	1	1
Acetobacter tropicalis	0.225123	0.27193	0.213404	0.534152	0.381581	0.966045	0.733147	4.14825e-72	1.26522e-70	1	1
Acidiphilium angustum	0.00338309	0.00842319	0.0586616	0.396981	0.398837	0.966045	0.536346	4.14645e-34	1.29709e-33	0.999999	1
Acidomonas methanolica	0.0117196	0.0234392	0.194323	0.534152	0.524134	0.966045	0.559752	2.11116e-34	7.15449e-34	0.999999	1
Acidovorax sp.	0.00863386	0.0195061	0.760243	0.923047	0.711967	0.966045	0.106027	0.000565352	0.000944835	0.999999	1
Acidovorax temperans	0.126364	0.168388	0.891394	0.923047	0.373707	0.966045	0.067598	0.0268382	0.0385208	1	1
Acinetobacter gyllenbergii	0.0960835	0.133207	0.666703	0.900094	0.295359	0.966045	0.0270148	0.359585	0.438694	1	1
Acinetobacter johnsonii	0.000464335	0.00166614	0.214536	0.534152	0.738436	0.966045	0.158071	7.64211e-06	1.50377e-05	0.999999	1
Acinetobacter sp.	7.34308e-06	3.58342e-05	0.0973631	0.417645	0.783839	0.966045	0.100618	0.00312103	0.00494501	0.999999	1
Agrobacterium tumefaciens	0.0414776	0.064054	0.0834321	0.417645	0.25173	0.966045	0.153794	0.00999068	0.0150477	0.369172	1
Asaia prunellae	0.0143207	0.0277322	0.0717757	0.396981	0.432717	0.966045	0.656123	1.08503e-49	7.78665e-49	0.999999	1
Asaia sp.	0.00391331	0.00954847	0.0271289	0.35202	0.270754	0.966045	0.55438	4.10686e-40	1.67012e-39	0.999999	1
Aspergillus nidulans	0.549433	0.611357	0.405217	0.683054	0.464444	0.966045	0.303821	2.57821e-14	6.04888e-14	0.999999	1
Aspergillus terreus,Malassezia globosa	0	0	0.912527	0.927736	0.702446	0.966045	0.357138	1.6677e-11	3.69927e-11	0.234018	1
Azospirillum brasilense	0.000773365	0.00262493	0.860252	0.923047	0.350141	0.966045	0.244021	0.000208403	0.000363217	0.103007	1
Azospirillum thiophilum	0.1484	0.182877	0.423706	0.698543	0.986396	0.986396	0.0366294	0.226967	0.285464	1	1
Borrelia coriaceae	0	0	0.713911	0.918716	0.00117079	0.142836	0.903144	2.75618e-89	3.36255e-87	0.0157236	1
Campylobacter mucosalis	0	0	0.490297	0.739044	0.604352	0.966045	0.0226625	0.495856	0.570702	1	1
Cardinium endosymbiont	0	0	0.0644317	0.396981	0.429982	0.966045	0.351752	1.29574e-18	3.36341e-18	0.999999	1
Caulobacter henricii	0.0116591	0.0234392	0.623984	0.865069	0.247511	0.966045	0.057673	0.0993839	0.13324	1	1
Chaetomium globosum	1.38429e-06	7.34275e-06	0.3046	0.619353	0.378163	0.966045	0.416656	2.00802e-21	5.69717e-21	1	1
Clostridium lentocellum	3.41237e-05	0.000148682	0.00298885	0.330446	0.819458	0.966045	0	1	1	1	1
Corynebacterium minutissimum	0.893789	0.9088	0.0252146	0.35202	0.284941	0.966045	0.00277355	0.923916	0.977752	1	1
Corynebacterium pseudogenitalium	0.0308119	0.051255	0.393774	0.679232	0.182554	0.966045	0.0404973	0.173	0.222169	1	1
Corynebacterium sp.	0.00939553	0.0204688	0.35494	0.656102	0.313299	0.966045	0.109351	0.000458697	0.000777237	1	1
Corynebacterium terpenotabidum	0.0013183	0.0037403	0.80989	0.923047	0.858796	0.966045	0.139388	7.16839e-05	0.000130529	1	1
Drosophila A Virus	3.53615e-07	1.96095e-06	0.699499	0.917623	0.922445	0.977708	0.108987	0.000395145	0.000678982	0.999999	1
Enterococcus hirae	0.00274267	0.00711928	0.457283	0.724527	0.583164	0.966045	0.143762	7.34302e-06	1.4686e-05	1	1
Escherichia coli	0.0404498	0.0632677	0.297972	0.616145	0.978603	0.986396	0.073367	0.0207724	0.03017	1	1
Exophiala xenobiotica	0.000275983	0.00108613	0.789962	0.923047	0.133028	0.966045	0.398368	6.35779e-19	1.6862e-18	0.999999	1
Fimbriimonas ginsengisoli	0	0	0.0582236	0.396981	0.284596	0.966045	0.202041	0.000154685	0.000273502	0.398954	1
Gardnerella vaginalis	0.104195	0.141242	0.850865	0.923047	0.411655	0.966045	0.0252541	0.42258	0.505439	1	1
Gemmata obscuriglobus	4.04472e-08	2.46728e-07	0.363611	0.662097	0.182933	0.966045	0.309367	1.68857e-13	3.81492e-13	0.999999	1
Gemmata sp.	0	0	0.582815	0.83651	0.646028	0.966045	0.225776	8.17804e-09	1.78165e-08	0.999999	1
Gluconacetobacter diazotrophicus	0.0421261	0.0642423	0.243734	0.550659	0.650231	0.966045	0.610759	8.58824e-44	4.36569e-43	0.999998	1
Gluconobacter frateurii	0.00229419	0.00608459	0.193663	0.534152	0.657855	0.966045	0.613626	3.51043e-44	1.86205e-43	0.999999	1
Gluconobacter morbifer	2.18249e-06	1.10943e-05	0.173382	0.534152	0.814934	0.966045	0.546449	3.77111e-34	1.21073e-33	1	1
Gluconobacter oxydans	0.0216801	0.0400754	0.440418	0.711809	0.477407	0.966045	0.568267	1.70484e-38	6.49969e-38	0.999999	1
Gluconobacter thailandicus	0.00136934	0.00379681	0.270521	0.58935	0.643994	0.966045	0.640103	1.30114e-45	7.55897e-45	1	1
Hymenobacter sp.	0.1481	0.182877	0.0356938	0.362887	0.581144	0.966045	0.0232025	0.4303	0.509676	1	1
Hymenobacter swuensis	0.0315092	0.051255	0.322334	0.634615	0.847415	0.966045	0.0713865	0.907367	0.971042	0.26949	1
Ideonella sp.	0.0227648	0.0414524	0.740964	0.923047	0.858507	0.966045	0.208035	8.9407e-05	0.000160407	0.398112	1
Klebsiella pneumoniae	0.128361	0.168388	0.190596	0.534152	0.610831	0.966045	0.199235	1.64824e-07	3.46698e-07	0.999999	1
Kocuria polaris	0.410571	0.468127	0.120119	0.472725	0.34917	0.966045	0.040125	0.176892	0.2248	1	1
Kocuria sp.	0.00705195	0.0162328	0.125396	0.473504	0.33362	0.966045	0.026045	0.386861	0.467297	1	1
Komagataeibacter europaeus	0.006684	0.0156817	0.202011	0.534152	0.939003	0.977708	0.551241	6.71138e-39	2.64125e-38	0.999999	1
Komagataeibacter hansenii	0.782461	0.830089	0.606065	0.849884	0.788352	0.966045	0.432781	4.48896e-23	1.30393e-22	1	1
Komagataeibacter intermedius	0.703067	0.759064	0.128079	0.473504	0.678257	0.966045	0.545847	7.97124e-34	2.43123e-33	1	1
Komagataeibacter kakiaceti	0.133169	0.171017	0.291797	0.61378	0.30097	0.966045	0.606849	9.72921e-44	4.74785e-43	1	1
Komagataeibacter medellinensis	0.0817969	0.116037	0.22303	0.54316	0.150789	0.966045	0.551514	1.279e-36	4.72844e-36	1	1
Komagataeibacter oboediens	0.089043	0.124865	0.179375	0.534152	0.537575	0.966045	0.59468	2.21988e-43	1.04164e-42	0.999998	1
Komagataeibacter rhaeticus	0.597137	0.656313	0.211179	0.534152	0.263754	0.966045	0.508801	1.23332e-26	3.66989e-26	0.756727	1
Komagataeibacter xylinus	0.0311049	0.051255	0.154639	0.534152	0.637575	0.966045	0.639413	1.20152e-52	9.16156e-52	1	1
Kozakia baliensis	0.0116391	0.0234392	0.0548173	0.396981	0.812138	0.966045	0.511758	5.45163e-36	1.95617e-35	1	1
Lactobacillus brevis	0.000383681	0.00145124	0.395291	0.679232	0.33373	0.966045	0.717956	1.05056e-61	1.42409e-60	0.999999	1
Lactobacillus fabifermentans	6.34366e-05	0.000266871	0.715394	0.918716	0.145863	0.966045	0.713654	6.20511e-62	9.46279e-61	1	1
Lactobacillus fermentum	0.0377631	0.0598325	0.88633	0.923047	0.845727	0.966045	0.505806	1.75987e-35	6.13441e-35	1	1
Lactobacillus kisonensis	0.973072	0.97464	0.884105	0.923047	0.130789	0.966045	0.519522	2.93094e-34	9.66417e-34	1	1
Lactobacillus plantarum	2.73482e-05	0.000123573	0.843302	0.923047	0.495599	0.966045	0.782065	2.74469e-78	1.67426e-76	1	1
Lactobacillus rhamnosus	0.0215266	0.0400754	0.887985	0.923047	0.72189	0.966045	0.669477	1.21685e-49	8.24752e-49	0.999999	1
Lactococcus lactis	2.24436e-11	1.61066e-10	0.354487	0.656102	0.85743	0.966045	0.0698064	0.0207728	0.03017	0.999999	1
Leuconostoc carnosum	0.0510813	0.0750833	0.516908	0.759793	0.624655	0.966045	0.041261	0.165221	0.214436	1	1
Leuconostoc pseudomesenteroides	2.61809e-08	1.68109e-07	0.288989	0.61378	0.068615	0.966045	0.124639	5.67354e-05	0.000106488	1	1
Luteipulveratus mongoliensis	0.866021	0.895377	0.0634914	0.396981	0.555814	0.966045	0.00763875	0.793173	0.879701	1	1
Mesorhizobium sp.	2.10845e-10	1.42906e-09	0.171371	0.534152	0.398439	0.966045	0.148167	1.48089e-05	2.86776e-05	1	1
Metarhizium brunneum	0	0	0.496735	0.739044	0.983711	0.986396	0.357852	1.72889e-17	4.30459e-17	1	1
Methylobacterium extorquens	0.00564278	0.0134984	0.0944497	0.417645	0.860134	0.966045	0.128662	0.000736389	0.00121405	0.999999	1
Methylobacterium sp.	0.170822	0.208402	0.389334	0.679232	0.677874	0.966045	0.0318072	0.282099	0.351184	1	1
Microbacterium sp.	0.362934	0.421695	0.0748407	0.396981	0.863106	0.966045	0.0520988	0.0815577	0.110556	1	1
Nora virus	0.000944023	0.00307132	0.749894	0.923047	0.0733974	0.966045	0.78967	2.02694e-70	4.94572e-69	0.999999	1
Paenibacillus borealis	0	0	0.788622	0.923047	0.183318	0.966045	0.520313	2.4087e-20	6.67866e-20	0.0339597	1
Paenibacillus sp.	0	0	0.836058	0.923047	0.745302	0.966045	0.289259	6.60985e-15	1.6128e-14	1	1
Pectobacterium carotovorum	0	0	0.408712	0.683054	0.214048	0.966045	0.116621	0.000931037	0.00151449	0.999999	1
Plasmodium vivax	0	0	0.911863	0.927736	0.73315	0.966045	0.286236	1.13426e-13	2.61094e-13	0.999999	1
Podospora anserina	0.0436915	0.065807	0.892784	0.923047	0.262883	0.966045	0.376283	1.0948e-17	2.78261e-17	0.999999	1
Propionibacterium acidipropionici	0.97464	0.97464	0.09071	0.417645	0.981126	0.986396	0.0570617	0.0571	0.0800712	0.999999	1
Propionibacterium acnes	0.000774568	0.00262493	0.47476	0.739044	0.711917	0.966045	0.127888	0.00336691	0.00519954	0.83	1
Pseudodonghicola xiamenensis	0	0	0.922078	0.929698	0.93178	0.977708	0.181223	6.3756e-05	0.000117852	0.743965	1
Pseudomonas fuscovaginae	0.291325	0.345064	0.0744758	0.396981	0.166771	0.966045	0.059684	0.836745	0.911455	0.391243	1
Pseudomonas moraviensis	0.026191	0.0456472	0.726934	0.923047	0.268326	0.966045	0.0546093	0.900875	0.971042	0.411189	1
Pseudomonas putida	0.133122	0.171017	0.970494	0.970494	0.327465	0.966045	0.184782	0.00986978	0.0150477	0.154995	1
Pseudomonas sp.	0.147005	0.182877	0.228474	0.54316	0.517627	0.966045	0.115738	0.00177071	0.00284245	1	1
Pseudomonas stutzeri	0.681507	0.742356	0.156212	0.534152	0.665401	0.966045	0.153246	0.159923	0.209792	0.0933676	1
Pseudomonas syringae	0.267816	0.320329	0.863502	0.923047	0.741629	0.966045	0.00938952	0.747511	0.836664	1	1
Psychrobacter glacincola	0	0	0.850499	0.923047	0.46801	0.966045	0.211029	9.79339e-09	2.09613e-08	1	1
Psychrobacter sp.	0.00095664	0.00307132	0.18499	0.534152	0.385156	0.966045	0.00256303	0.929666	0.977752	0.999999	1
Rhizobacter sp.	0.00911727	0.0202238	0.843928	0.923047	0.087028	0.966045	0.0892897	0.0514359	0.0729672	0.801582	1
Saccharomyces cerevisiae	8.11361e-06	3.80716e-05	0.605017	0.849884	0.922792	0.977708	0.0207746	0.479443	0.557067	1	1
Sphingomonas hengshuiensis	0.0365189	0.0586224	0.487355	0.739044	0.836052	0.966045	7.64322e-14	1	1	1	1
Sphingomonas parapaucimobilis	0.01843	0.0351321	0.443422	0.711809	0.798179	0.966045	0.0243397	0.435392	0.510748	1	1
Sphingomonas phyllosphaerae	0.0111729	0.0234392	0.0992764	0.417645	0.833751	0.966045	0.00698498	0.810446	0.890761	1	1
Sphingomonas sp.	0.865637	0.895377	0.322509	0.634615	0.211346	0.966045	3.50188e-16	0.999999	1	1	1
Sphingomonas wittichii	0.0265666	0.0456496	0.0108343	0.330446	0.724152	0.966045	0.0475466	0.111047	0.147258	0.999999	1
Sporolactobacillus terrae	0.388334	0.44695	0.264319	0.586307	0.905638	0.977708	0.0727563	0.0161193	0.0239824	1	1
Staphylococcus aureus	0.551223	0.611357	0.0744672	0.396981	0.179389	0.966045	0	1	1	1	1
Staphylococcus epidermidis	0.336398	0.394621	0.10439	0.42452	0.438988	0.966045	0.0893955	0.00336052	0.00519954	1	1
Staphylococcus gallinarum	0.00111117	0.00338906	0.671382	0.900094	0.945652	0.977708	0	1	1	1	1
Streptococcus pneumoniae	0	0	0.632483	0.866999	0.234775	0.966045	0.215151	2.96858e-06	6.03612e-06	0.702381	1
Streptococcus salivarius	0.128217	0.168388	0.00763064	0.330446	0.462028	0.966045	0.0614712	0.0593384	0.0822646	0.999999	1
Streptomyces griseoflavus	0.00122693	0.00356394	0.757232	0.923047	0.541123	0.966045	0.296176	1.31702e-14	3.15053e-14	1	1
Streptomyces pristinaespiralis	2.2333e-07	1.29744e-06	0.690948	0.916257	0.510333	0.966045	0.351234	6.24445e-19	1.6862e-18	1	1
Streptomyces sp.	0	0	0.495883	0.739044	0.883512	0.971068	0.235264	2.03372e-05	3.87678e-05	0.292316	1
Terriglobus roseus	0.893901	0.9088	0.235963	0.54316	0.8318	0.966045	5.54151e-15	0.999999	1	1	1
Tremella mesenterica	0	0	0.814126	0.923047	0.781013	0.966045	0.202267	2.9955e-07	6.19409e-07	0.999999	1
Xanthomonas sp.	0.0111599	0.0234392	0.0586261	0.396981	0.661794	0.966045	0.0194615	0.507309	0.578428	1	1
Xanthomonas vesicatoria	0.0130812	0.0257405	0.386879	0.679232	0.297853	0.966045	0.0790034	0.0674167	0.0924139	0.872279	1
Yersinia mollaretii	0.023956	0.042357	0.341293	0.656102	0.301875	0.966045	0.0124448	0.68918	0.778518	1	1
Yersinia pekkanenii	0.0729019	0.104636	0.0081747	0.330446	0.611556	0.966045	0.0315665	0.285689	0.352061	0.999999	1
Zymomonas mobilis	0.826431	0.869177	0.19983	0.534152	0.876269	0.971068	0.724485	6.75656e-67	1.17757e-65	0.999999	1

## Sheet: Table S10C
Microbial Species	100_mean	101_mean	105_mean	109_mean	129_mean	136_mean	138_mean	142_mean	149_mean	153_mean	158_mean	161_mean	176_mean	177_mean	181_mean	189_mean	195_mean	208_mean	217_mean	21_mean	223_mean	227_mean	228_mean	229_mean	233_mean	235_mean	237_mean	239_mean	256_mean	26_mean	280_mean	287_mean	28_mean	301_mean	303_mean	304_mean	306_mean	309_mean	310_mean	313_mean	315_mean	317_mean	318_mean	319_mean	31_mean	320_mean	321_mean	324_mean	325_mean
Acetobacter aceti	9.53819	7.73361	11.9648	8.52726	9.01557	10.5644	10.655	9.80032	8.51635	9.89635	9.09816	8.74362	10.5164	9.79463	8.14006	9.62583	11.1233	7.71474	8.71678	10.3833	8.95648	9.34528	9.37363	9.86062	10.8445	7.91502	7.83748	9.52821	11.8167	8.51553	11.0457	7.15189	10.3546	9.61341	9.55543	9.72769	6.88948	10.3156	10.0434	10.0562	11.1241	6.88076	8.16159	10.2955	10.6498	9.97854	8.53106	8.80003	6.89001
Acetobacter cibinongensis	3.79229	3.74371	4.26909	5.35098	3.42682	3.08504	4.09618	3.37408	3.77824	3.0659	5.46025	3.22439	4.21207	5.19375	4.41444	3.12938	3.40569	4.68957	3.33159	3.57949	4.36157	5.09897	4.00563	3.31723	5.4413	3.25976	4.15879	4.8317	4.76963	3.27389	4.07483	4.78265	4.38436	2.95462	4.30467	3.71862	4.51775	3.51133	5.12152	4.6294	2.91699	4.59474	3.45437	3.30332	3.26007	2.92565	4.31719	4.26903	4.24411
Acetobacter ghanensis	6.01569	5.64236	6.65604	7.17966	5.79846	5.482	6.25513	5.28719	6.38834	5.2953	7.42572	5.57626	6.23854	7.46657	6.15866	5.83579	5.81839	6.36617	5.80403	5.89046	6.37592	6.95124	5.95006	5.57481	7.76096	5.69785	5.5998	6.71998	6.77808	5.59542	7.0599	6.22287	6.739	5.8236	6.56539	5.7037	6.15661	5.73913	7.07863	6.86609	5.47709	5.95383	5.2919	6.18594	6.50262	5.09813	6.14619	6.33143	6.33047
Acetobacter indonesiensis	4.13382	3.34667	5.35575	5.76959	3.9013	3.66187	4.96996	3.50625	6.0413	3.59826	5.95513	3.73711	4.50309	7.15674	5.03967	3.25704	3.92792	4.48402	4.6061	4.76811	4.65853	5.72074	3.88657	3.30395	7.26393	4.32675	3.53395	6.12988	5.23382	5.51459	4.35296	4.04008	4.18419	4.21954	5.62913	4.63197	4.61312	3.70721	5.70578	5.56278	3.67105	3.83255	3.65749	3.79996	3.88493	3.24349	3.91075	4.38614	5.24562
Acetobacter malorum	3.53113	2.98567	4.96328	5.37733	3.26934	3.83028	6.05809	3.56429	7.63322	4.05705	4.90535	2.97673	5.09103	5.44585	3.77948	3.49252	3.92287	3.92273	5.57262	6.04196	3.60244	4.50492	4.69068	3.69127	5.87709	3.08935	3.27354	4.88191	5.72283	4.28619	4.04825	3.69621	3.84304	4.67329	4.19062	3.64309	3.6898	3.53348	6.88903	4.19799	3.93591	3.45759	3.40068	3.45705	3.30174	3.48695	3.56179	3.60469	3.87669
Acetobacter nitrogenifigens	5.48906	3.59916	7.79172	4.62532	4.94185	6.45513	6.67349	5.75203	4.95585	5.67052	5.13579	4.79611	6.39353	6.35059	4.25372	5.59194	7.02526	3.58382	4.80299	6.26038	4.86501	5.39501	5.32491	5.66882	6.8796	4.11688	3.629	5.40941	7.69868	4.87505	6.93046	2.92827	6.22131	5.5705	5.66526	5.6551	2.96262	6.12666	5.9339	5.89969	6.90448	2.57792	4.19749	6.15254	6.49679	5.87925	4.39375	4.87997	3.38181
Acetobacter okinawensis	4.20742	4.12157	4.41255	5.82961	3.96443	3.24	4.26304	3.55055	4.4146	3.26133	5.89435	3.67466	4.50905	5.48366	4.81628	3.51807	3.2614	5.14289	3.75226	3.55312	4.90473	5.5508	4.47984	3.73733	5.91694	3.84577	4.5706	5.18697	4.84103	3.58577	4.7395	5.23721	4.95596	3.47229	4.79866	4.06751	5.02022	3.90786	5.58951	5.20644	3.05743	5.02442	3.90562	3.93289	3.80794	3.24952	4.79561	4.7345	4.69565
Acetobacter orientalis	3.00092	3.08916	3.1298	4.71119	2.69042	1.8623	3.33083	2.70623	3.41833	2.38271	4.85412	2.49081	3.41412	4.64008	3.77805	2.54105	1.96134	4.02018	2.82513	2.60546	3.65618	4.52285	3.28046	2.46913	4.80847	2.85831	3.36987	4.34793	3.76342	2.70661	3.28166	4.07717	3.68205	2.26795	3.64613	2.92362	3.9977	2.62786	4.44325	3.94915	1.62672	3.83408	2.8496	2.46126	2.26581	2.20729	3.64693	3.65349	3.73632
Acetobacter papayae	4.75171	4.37605	5.68576	4.78032	3.84067	4.52832	5.4709	4.55892	4.07068	4.12968	6.00709	3.69921	4.83329	5.30367	5.15118	4.46713	4.88257	3.96704	3.82847	4.62183	4.09745	4.73571	4.00599	3.93144	6.51827	3.55368	3.49293	4.73987	5.99134	4.38946	5.15436	4.91076	4.92466	3.88868	5.18214	4.08238	3.74372	4.78458	5.06127	4.93551	4.78589	4.51528	3.13474	4.35473	4.72881	4.39783	4.1781	4.12982	3.93943
Acetobacter pasteurianus	11.7824	11.839	10.9476	13.4889	11.2825	9.48763	11.1642	10.342	10.5961	10.2768	13.6022	10.8259	11.8199	12.4745	12.5321	10.6257	9.30988	12.8582	11.0697	10.0522	12.5546	13.3314	12.0102	11.0161	13.2464	11.1549	12.3937	12.8382	11.8704	10.7324	11.3768	13.0937	12.4177	10.1816	11.961	11.4389	12.8118	11.1781	13.2305	12.8137	9.04669	12.905	11.5903	11.1715	10.3715	10.3765	12.5462	12.2761	12.2449
Acetobacter persici	3.735	3.10475	5.10368	5.42547	3.14571	3.65844	6.52561	3.64306	8.2351	4.38198	4.84857	2.95102	5.30163	5.299	3.68002	3.73866	4.02202	3.96866	5.92234	6.34771	3.67865	4.49551	5.01421	3.86343	6.04981	3.0055	3.13816	4.98164	5.96638	4.34236	4.07189	3.57976	3.89349	5.02694	4.0185	3.58489	3.81541	3.70226	7.31062	4.22012	3.83784	3.32509	2.93012	3.61783	3.71113	3.46484	3.46504	3.55838	3.76652
Acetobacter pomorum	9.75252	9.69335	9.00824	11.5241	9.42353	7.50608	9.13003	8.54093	8.32024	8.44947	11.8049	8.87318	9.98158	10.5501	10.7686	8.64984	7.12676	10.9403	9.10685	8.05399	10.7873	11.4168	9.99593	9.06405	11.4449	9.07793	10.4886	10.9369	9.83847	9.07174	9.56943	11.3185	10.6489	8.10483	10.0291	9.53288	10.9065	9.30537	11.2847	10.9729	6.97803	10.9634	9.70055	9.26495	8.38103	8.26598	10.6415	10.3699	10.2894
Acetobacter senegalensis	6.40522	5.8552	7.28888	8.20462	6.16163	5.23612	6.50999	5.37005	6.9167	5.16099	8.41287	5.9397	6.47703	9.46778	7.49269	5.07668	5.64625	7.00253	6.34752	5.97325	7.02747	8.19081	6.11251	5.35079	9.55299	6.6245	6.1019	8.8033	6.96734	7.7258	6.0327	6.76628	6.39525	5.99437	7.89668	6.91907	7.18312	5.69296	7.49365	8.21139	5.17438	6.47105	5.96774	5.664	5.6143	5.3376	6.45488	6.70166	7.55592
Acetobacter syzygii	3.82905	3.74038	4.38266	5.35612	3.57158	3.33014	4.06544	3.34122	3.44109	3.1371	5.55512	3.14951	4.1648	4.95939	4.43271	3.37441	3.34575	4.75693	3.37338	3.4282	4.41835	5.19537	3.96279	3.33086	5.46176	3.38311	3.95952	4.99311	4.72339	3.26922	4.47258	4.76745	4.65772	3.07769	4.34781	3.56605	4.50917	3.8341	5.18366	4.85621	3.22937	4.47785	3.42491	3.68984	3.40438	3.08082	4.40397	4.26533	4.27147
Acetobacter tropicalis	6.10066	5.26195	7.62533	8.13358	6.16084	5.10282	6.02708	4.90672	6.84989	4.72603	8.47567	6.0582	6.10885	10.1003	7.57065	4.65241	5.64071	6.57727	6.38565	5.86105	7.02733	8.32931	5.39861	4.79134	10.266	6.91897	5.25614	8.25627	6.67956	8.42159	5.80725	5.93347	5.90898	6.19751	8.35539	7.20409	6.89856	5.26615	6.98464	7.68682	5.15173	5.63072	5.7976	5.41149	5.65528	4.98686	5.91738	6.41641	7.76273
Acidiphilium angustum	0.358496	0.57625	0.16394	2.08675	-0.173687	-1.26697	0.20064	-0.0510174	-0.53464	-0.368561	2.12873	-0.110687	0.527431	1.16156	0.858463	-0.437233	-1.51805	1.34818	-0.331143	-2.63302	0.96252	1.78868	0.550782	-0.356814	2.17373	0.35929	0.865239	1.59474	0.639589	-0.407958	0.286485	1.69611	0.972633	-1.35261	0.404509	0.447558	1.41541	-0.0165314	1.84995	1.46602	-0.817494	1.4103	-0.251582	-0.130426	-0.714373	-0.688959	1.01101	0.779069	0.918457
Acidomonas methanolica	2.54384	2.17148	4.10107	3.66413	2.15049	3.10415	3.23738	2.39175	2.11784	2.56022	3.85144	1.81752	3.21644	3.71442	2.72176	2.32671	3.09782	2.64133	2.0854	2.82396	2.72681	3.43615	2.65572	2.27357	4.23081	1.89367	2.22283	3.37261	4.10225	2.22712	3.26663	2.79314	3.16108	2.11595	3.04925	2.73113	2.61296	2.78071	3.62038	3.24164	3.20615	2.75801	1.77235	2.68343	2.59219	2.45729	2.65122	2.52647	2.61321
Acidovorax sp.	0.258771	0.412727	0.262972	0.234669	0.639214	0.582421	0.510267	0.670319	0.564668	0.429467	0.212052	0.476869	0.216094	0.14102	0.768153	0.576909	0.558841	0.351684	0.451696	0.420782	0.430495	0.0495337	0.954311	0.354359	0.249976	0.445269	0.583859	0.235174	0.303275	0.777876	0.523892	0.611849	0.478239	0.527343	0.346003	0.441302	0.426334	0.76474	0.0431692	0.147502	0.672862	0.421269	0.519891	0.485249	0.4152	0.230574	0.368467	0.329766	0.352031
Acidovorax temperans	-1.87241	-1.65856	-1.76243	-2.37805	-1.68098	-1.64664	-1.78268	-1.65306	-1.74625	-1.64696	-1.91171	-1.74626	-1.81063	-2.1564	-1.62047	-1.4345	-1.71831	-2.04388	-1.74418	-2.17471	-1.7704	-1.87052	-1.45549	-1.66255	-1.83605	-1.52644	-1.67186	-1.92108	-1.88037	-1.3948	-1.67968	-1.75298	-1.80913	-2.10557	-1.82142	-1.5683	-1.75155	-1.83196	-1.91839	-1.70774	-1.53475	-1.74541	-1.73987	-1.54851	-1.77293	-1.82136	-1.87049	-2.12698	-1.652
Acinetobacter johnsonii	0.435726	0.451175	0.0558846	0.00329775	0.385216	0.563655	0.476021	0.736938	0.322697	0.562322	-0.191711	0.460252	0.332849	0.13977	0.467493	0.841131	0.294903	0.262799	0.83129	0.232263	0.192573	0.270126	0.621309	0.466088	0.192416	0.523655	0.362922	0.0916913	0.366959	0.573453	0.237621	0.431187	0.427187	0.659926	0.286112	0.380635	0.319098	0.493965	0.177243	0.222939	0.39159	0.576918	0.481407	0.266638	0.267062	0.377817	0.166612	0.482785	0.442121
Acinetobacter sp.	-0.0226127	-0.0577111	-0.468616	-0.337645	-0.309871	0.147311	0.0543839	0.185128	0.0417129	0.288532	-0.30727	0.162419	-0.132167	-0.455743	-0.10507	0.0884239	-0.0224758	-0.268277	0.0137501	-0.238651	-0.205477	-0.205876	-0.0310149	0.00534603	-0.460035	0.0680908	-0.109899	-0.167939	0.0478785	-0.163028	-0.158371	-0.10459	-0.229441	0.0416934	-0.227406	-0.213247	-0.0767985	-0.0193876	-0.448968	-0.151921	-0.167575	-0.0493586	-0.164588	-0.164984	-0.262292	0.0642019	0.104756	-0.03804	-0.303256
Agrobacterium tumefaciens	-0.790725	-0.804533	-0.615894	-0.996147	-0.752357	-0.633036	-0.598704	-0.86719	-0.999518	-0.789025	-1.14504	-0.817387	-0.952918	-0.852213	-0.698677	-0.614048	-0.872988	-0.919473	-0.719118	-0.698948	-0.887418	-1.04022	-0.545684	-0.898317	-0.834313	-0.438394	-0.815799	-0.929301	-0.92949	-0.711027	-0.925437	-0.66852	-0.751073	-0.73696	-1.01365	-0.785155	-0.875893	-0.68963	-0.927121	-1.00588	-0.733863	-0.820465	-0.984296	-0.829533	-0.733719	-0.802864	-0.833734	-0.805996	-0.696749
Asaia prunellae	1.9774	1.56967	3.80437	3.5975	1.52283	2.78233	2.98736	2.08304	2.09397	1.97294	3.69791	1.39221	2.73882	3.88708	2.70052	1.44755	2.50138	2.50682	1.54378	2.75662	2.32905	3.42357	2.24819	1.84992	4.20267	1.69566	1.90194	3.10068	4.00911	2.34261	2.30629	2.60824	2.64354	1.55816	2.99007	2.53446	2.48968	2.47261	3.36828	2.87886	2.65259	2.50309	1.24229	2.24797	1.29085	2.08424	2.44026	2.32534	2.50985
Asaia sp.	1.78866	1.53182	2.66663	3.22519	1.13656	1.55148	2.32019	1.60869	1.62962	1.32744	3.45962	1.1774	2.33339	3.29361	2.40342	0.911845	1.48823	2.38402	1.20586	1.49832	2.00572	3.15031	2.14653	1.41189	3.4905	1.24476	2.02842	2.85004	3.1661	1.33988	1.58876	2.66354	2.38865	0.566659	2.15053	1.93884	2.50031	1.83108	3.10912	2.60495	1.63893	2.5168	1.38836	1.28914	0.854091	1.56304	2.15272	2.12424	2.32606
Aspergillus nidulans	5.64113	5.55718	5.50066	5.01605	5.61945	5.58931	5.11793	5.32175	5.60407	5.24132	4.92846	5.35356	5.55362	5.16598	5.64799	5.893	5.29054	5.1635	5.74006	5.55371	5.11658	4.94714	5.37814	5.76614	5.05658	5.4049	5.67063	4.64837	5.28158	5.45987	5.21778	5.30617	5.5581	5.50388	5.36582	5.30604	5.44662	5.54773	5.13898	5.01566	5.35454	5.66401	5.70682	5.53213	5.61989	5.82348	5.53611	5.52309	5.43425
Aspergillus terreus,Malassezia globosa	7.67172	7.78588	7.39164	7.13933	7.60295	7.53695	7.01231	7.27274	7.47501	7.26668	6.90674	7.43326	7.42477	7.17272	7.66745	8.05093	7.39764	7.35434	7.63108	7.57901	7.22673	7.11804	7.50289	7.69903	7.35245	7.51635	7.78299	6.84879	7.05685	7.73521	7.30011	7.43114	7.62729	7.32445	7.35346	7.44602	7.38017	7.52221	7.03576	7.09256	7.49212	7.58779	7.62452	7.47623	7.46658	7.49608	7.62799	7.27723	7.23347
Azospirillum brasilense	-1.43176	-1.27081	-1.29923	-0.550614	-1.16998	-1.15479	-0.82362	-1.29614	-0.962862	-1.22723	-0.443139	-1.87779	-1.11415	-0.36779	-1.44916	-1.15342	-1.70681	-1.02506	-1.6775	-1.21222	-1.32173	-0.718222	-1.24993	-2.3755	-0.483126	-0.832434	-1.10093	-0.874853	-1.00718	-1.44558	-1.16019	-0.887457	-1.15448	-0.97429	-1.12441	-1.4948	-1.02614	-1.26094	-0.651023	-0.987691	-1.05702	-1.15173	-1.32194	-1.50587	-1.4791	-1.34244	-1.48764	-1.142	-0.948869
Borrelia coriaceae	8.47247	6.31119	6.40936	4.12468	9.11624	5.01715	5.59084	6.45096	6.24192	5.05601	6.57987	6.98333	7.64157	5.62558	9.06968	6.65837	8.03229	5.12413	5.78655	5.82547	4.70818	8.11457	7.57768	7.20766	6.54201	6.38699	7.30877	5.91917	5.48686	4.45898	4.35438	6.68746	6.03609	5.16041	5.38417	7.02174	4.25548	7.78882	5.59444	5.18413	7.13643	6.88444	5.26263	6.70899	7.03693	7.39505	6.09093	4.66925	5.68067
Cardinium endosymbiont	1.58393	1.42425	1.36515	0.34694	0.827001	1.22432	0.631882	0.984815	1.39297	1.03678	0.107509	0.200837	0.686789	0.490278	1.09388	1.35114	0.455584	0.904279	1.54054	0.774794	1.39302	0.083004	0.529869	1.70616	-0.149413	0.889225	1.03744	0.0230923	-0.94149	1.67713	0.818442	1.70176	1.42582	0.974183	0.756783	0.724648	1.01679	1.14507	0.555132	0.518032	0.230327	0.578072	1.50437	0.655549	1.32313	0.768411	0.783748	1.53422	0.878607
Chaetomium globosum	7.82788	7.46036	7.33326	7.22426	7.58652	7.53948	6.92249	7.0706	7.37536	7.24807	6.5118	7.11699	7.40686	6.88245	7.59762	7.81582	7.40122	6.90462	7.50632	7.38283	6.71117	6.91698	7.51843	8.48646	6.90524	7.27632	7.51022	6.36879	7.40428	7.54054	7.13022	7.12587	7.50821	7.76352	7.30941	7.29736	7.27986	7.44737	7.01013	6.88298	7.44433	7.83543	7.544	7.46493	7.50648	7.74639	7.57222	7.6496	7.25905
Corynebacterium sp.	0.112466	0.235944	0.0251951	-0.130067	0.123215	0.131599	0.0820977	0.158877	0.121973	0.40607	-0.398142	0.0246921	-0.267518	-0.215782	-0.0964385	0.430843	0.158536	-0.179357	0.109866	-0.16289	-0.0742398	-0.214982	0.213893	-0.127757	-0.229476	0.126334	0.0223444	-0.116348	-0.0347572	-0.0277295	-0.0517304	-0.120684	-0.32967	0.0993437	-0.168208	0.353396	-0.0536524	-0.0740174	-0.353318	-0.0759353	0.23906	0.136594	0.158415	0.159114	0.142417	0.2774	-0.330508	0.0776297	0.203274
Corynebacterium terpenotabidum	-0.254713	-0.904199	-0.592069	-1.02312	-1.02406	-0.624255	-0.506528	-0.757449	-0.574332	-0.142066	-1.15419	-0.753084	-0.860928	-1.01108	-0.878997	-0.477394	-0.865058	-1.29603	-0.663609	-0.863187	-0.923801	-0.93702	-0.471156	-0.538238	-1.20402	-0.809953	-0.76213	-0.837509	-0.784215	-0.909677	-0.904823	-0.874822	-1.98016	-0.655755	-0.96686	-0.198974	-0.706207	-0.662757	-1.89127	-0.856736	-0.595727	-0.968034	-0.484467	-0.687962	-0.80782	-0.45482	-1.27862	-0.667198	-0.584152
Drosophila A Virus	-7.30827	-6.71784	-7.92231	-8.46991	-8.46991	-8.43668	-7.95904	-7.37677	-8.43668	-7.43954	-8.46991	-7.96091	-7.44724	-7.54668	-7.12942	-7.21965	-7.41882	-8.05244	-6.67388	-7.93305	-7.37009	-8.03458	-7.22972	-7.23982	-7.5214	-7.96991	-7.16399	-7.08617	-6.88327	-8.46991	-8.43668	-8.43668	-8.46991	-8.46991	-8.46991	-8.43668	-7.9153	-8.00173	-7.26183	-8.46991	-7.78225	-8.43668	-7.86762	-7.332	-7.96765	-8.02092	-8.43668	-8.01539	-8.46991
Enterococcus hirae	0.2571	-0.484473	-0.456079	-0.157811	-0.253198	-0.288667	0.0623063	0.119	0.138317	0.511449	0.224778	0.135477	-0.285225	0.522669	0.574109	-0.250791	-0.202463	0.521678	0.190903	-0.720766	0.179471	0.0211771	-0.0683377	-0.272391	-0.949163	0.0430783	-0.0455347	0.101499	-0.0600967	-0.301968	-0.159854	0.0135447	-0.033547	0.550033	-0.057235	0.161731	-0.404502	0.327547	-0.594318	-0.0069159	-0.126499	-0.0723712	0.252366	0.0985396	-0.0845231	0.0125248	-0.0313988	0.323806	-0.127763
Escherichia coli	4.26061	4.2881	4.07007	4.04897	4.18077	3.92925	4.27225	4.30192	4.00757	4.26538	4.36311	4.21446	4.05253	4.00081	4.26752	4.89859	4.23038	4.20736	4.21446	4.26764	4.22248	3.95758	4.16264	4.07809	3.85062	4.13749	4.16193	3.93063	4.14506	4.39094	4.2423	4.29316	4.07019	4.18982	3.99512	4.422	4.12233	4.15032	4.12433	3.92835	4.18777	4.19462	4.13534	4.17144	4.14756	4.10326	4.33259	4.12034	4.19806
Exophiala xenobiotica	2.64428	2.79851	2.34462	2.07173	3.17037	2.43419	1.90843	2.42199	2.7368	2.73931	1.78651	2.55986	2.57121	2.14685	2.67032	4.11228	3.68406	2.13699	2.59528	2.47633	2.19547	2.31886	2.52023	2.89618	2.03393	2.8307	2.70109	1.56164	2.36232	3.11578	2.33048	2.53917	2.22326	2.31234	2.33897	2.36664	2.26568	2.75174	2.06694	1.92308	2.54637	2.34588	2.50132	2.58889	2.52395	2.53954	3.0449	2.37484	2.33461
Fimbriimonas ginsengisoli	-1.36968	-0.97928	-2.19517	-1.78338	-0.937195	-1.98638	-1.79995	-1.58101	-1.9475	-1.6401	-2.6123	-1.52645	-1.33799	-3.3042	-1.38503	-2.02833	-1.51772	-1.90752	-1.823	-2.64268	-1.68632	-1.90013	-1.54563	-1.40335	-2.35769	-2.27687	-1.42426	-1.9107	-2.72469	-0.24767	-2.62004	-1.55015	-1.93275	-2.66404	-1.61069	-1.71981	-1.49708	-1.76313	-2.50558	-3.76273	-1.88663	-1.76357	-1.76246	-1.67183	-1.69286	-1.76898	-1.94386	-1.92822	-1.79239
Gemmata obscuriglobus	9.47832	9.52303	9.33913	9.01831	9.35855	9.4177	8.95763	9.14171	9.37826	9.32608	8.87453	9.23286	9.43644	9.03658	9.34511	9.77091	9.3479	9.00492	9.59634	9.50818	8.97957	8.88466	9.4147	9.62245	9.09494	9.42852	9.51543	8.56401	9.15498	9.40405	9.18443	9.22104	9.53822	9.36465	9.35583	9.33287	9.44053	9.38946	9.09172	8.99206	9.40831	9.48913	9.56995	9.39916	9.31001	9.62061	9.39543	9.3249	9.19247
Gemmata sp.	1.84645	1.48037	1.41547	1.14199	2.51811	2.12443	0.913631	1.75669	1.92025	1.56366	0.77416	0.841068	0.898407	0.415346	2.23664	1.05639	1.79325	1.41501	1.23664	0.417467	1.35416	0.903141	1.4525	1.68863	1.19171	1.32948	1.83214	0.750164	0.953865	2.68833	1.87489	1.66537	1.28347	1.66943	1.8084	1.3907	1.22814	1.90689	0.859667	1.50375	1.15239	1.61201	1.71752	1.92829	1.9457	1.46598	1.0235	2.08865	2.43344
Gluconacetobacter diazotrophicus	5.0928	4.4927	7.40946	6.24534	4.43239	6.32848	6.39692	5.49338	5.26185	5.46905	6.30876	4.16197	6.30399	6.5054	5.28916	4.61264	6.16499	5.3482	4.58225	6.19239	5.08911	6.11787	5.44908	5.35944	6.91284	4.15275	5.06608	5.87761	7.32127	5.04043	5.42273	5.3249	5.82893	4.67513	5.68985	5.60634	5.1866	5.94026	6.43581	5.65827	6.42271	5.1362	4.27507	5.60551	4.49326	5.68645	5.13656	5.03955	5.05486
Gluconobacter frateurii	4.06564	3.71456	4.11505	5.17104	3.61804	2.91992	4.12949	3.37524	3.40709	2.82841	5.45847	3.57152	3.90035	4.63882	4.2969	3.8481	3.41948	4.29702	3.32751	3.44527	4.31854	4.71085	3.71389	3.32723	5.67989	3.36223	3.69371	4.53154	4.37246	3.35605	5.12867	4.59912	4.70393	3.57474	4.5674	3.30398	4.03403	3.54103	4.76756	4.8416	2.95131	4.30987	3.25105	4.03623	4.47073	2.9315	4.17303	4.19302	3.90229
Gluconobacter morbifer	2.06061	1.6367	2.27648	3.09753	1.52668	1.05304	2.36909	1.30806	1.23882	1.10126	3.44862	1.46958	1.88464	2.58825	2.35508	1.81099	1.48639	2.21058	1.40827	1.51724	2.10948	2.61448	1.78728	1.34098	3.59627	1.12121	1.70143	2.44417	2.47675	1.28347	2.87378	2.52728	2.51097	1.58962	2.4721	1.4979	1.96303	1.71695	2.62558	2.69812	1.33604	2.13531	1.19805	1.96966	2.32258	1.27391	1.9115	2.19901	1.68005
Gluconobacter oxydans	6.09003	5.79233	6.52027	7.0454	5.7405	5.50926	6.47075	5.78379	5.38287	5.46682	7.44763	5.71179	6.16874	6.68379	6.25439	5.96367	5.97946	6.14042	5.43889	5.58883	6.20924	6.53909	5.78558	5.61471	7.73701	5.26809	5.61598	6.51591	6.79899	5.56902	7.13341	6.52335	6.74499	5.65879	6.55901	5.4849	5.94059	5.86364	6.73462	6.83258	5.60503	6.24217	5.22053	6.14644	6.63432	5.42859	5.99499	6.14309	5.70209
Gluconobacter thailandicus	1.90117	1.68566	2.37024	3.09189	1.52407	1.21689	2.25466	1.52656	1.3095	1.12594	3.46219	1.56302	1.94227	2.64662	2.30596	1.87525	1.70737	2.188	1.21565	1.30595	2.12807	2.64746	1.62042	1.34839	3.69853	1.14476	1.64143	2.47147	2.67885	1.47027	3.15483	2.48362	2.62304	1.40854	2.39546	1.12688	1.92652	1.82226	2.74968	2.71644	1.24206	2.23732	1.17506	1.86096	2.27845	1.23389	2.00682	2.04047	1.75067
Ideonella sp.	0.343747	0.553908	0.285888	0.153599	0.781041	0.480641	0.45547	0.730186	0.517642	0.619617	0.103201	0.486643	0.268389	0.0526312	0.547696	0.85295	0.443128	0.352486	0.226935	0.536016	0.394418	0.0937387	0.99877	0.223886	0.152335	0.657405	0.504488	0.0216295	0.36927	0.754064	0.500732	0.571838	0.367443	0.598481	0.344533	0.578678	0.541614	0.692003	0.0862566	0.246509	0.69573	0.272502	0.510559	0.73248	0.351874	0.272505	0.415645	0.497318	0.47472
Klebsiella pneumoniae	1.03152	0.918738	0.472691	0.310113	0.85299	0.716971	0.402586	0.703867	0.65368	0.977774	0.185806	0.501351	0.461362	0.411311	0.95625	2.15729	0.687005	0.438899	0.715611	0.658491	0.465818	0.47025	0.866349	0.633073	0.170224	0.93896	0.775148	0.19326	0.453592	0.616771	0.28411	0.556032	0.64471	0.642919	0.533399	0.890149	0.605142	0.854887	0.176683	0.440655	0.673671	0.859987	0.613826	0.430501	0.573724	0.66666	0.735764	0.463783	0.676848
Komagataeibacter europaeus	5.9457	5.25521	6.63829	6.91878	5.70044	5.45827	6.46241	5.30792	7.01527	5.43899	6.97862	5.58145	6.07708	7.23968	5.83137	5.71832	6.00431	5.85633	6.07666	6.30765	6.12864	6.48491	5.76506	5.64758	7.55166	5.43311	5.56577	6.84547	6.8506	6.01266	6.78107	5.91844	6.51974	5.75959	6.43688	5.6857	5.85095	5.6697	7.02669	6.9139	5.72102	5.68221	5.14542	6.20947	6.55309	5.41622	5.82674	5.85343	5.74712
Komagataeibacter hansenii	-1.19423	-5.13627	1.29864	-1.05045	-4.29215	0.099065	0.0146228	-0.207583	-1.66017	-0.452567	0.668741	-1.96807	-0.689686	0.33343	-1.15073	-1.7032	0.150631	-3.67343	-1.93942	-0.634467	-2.02239	-0.361779	-1.57999	-0.609423	0.618012	-2.70681	-5.36536	-0.823691	0.564049	-0.406642	-0.428032	-1.47069	0.146454	-0.365561	-0.389782	-1.13603	-5.56298	-0.757029	-1.07383	-1.7505	0.611531	-3.8881	-1.9869	-0.69114	-1.58646	-1.24233	-0.825104	-3.76643	-3.63265
Komagataeibacter intermedius	2.92947	2.60172	4.3806	4.61148	2.53653	3.37361	3.93134	2.94889	3.57018	3.22156	4.62689	2.46449	3.66526	4.98094	3.59852	2.38392	3.3475	3.5263	3.00499	3.26222	3.30448	4.26473	3.29939	2.88736	5.13816	2.4455	2.79092	4.39143	4.62441	3.4396	3.17608	3.49249	3.45009	2.70194	3.91289	3.41376	3.75824	3.14689	4.29962	3.9865	3.40383	3.34653	2.33184	3.00599	2.4987	3.04647	3.03576	3.22124	3.51184
Komagataeibacter kakiaceti	1.31404	0.612202	2.2054	2.50804	1.3657	1.06672	2.04191	0.486587	1.54379	0.726872	2.70043	1.23445	1.43837	2.6771	1.48619	1.47043	1.59151	1.30225	0.926195	1.55424	1.66757	2.1186	0.801644	1.10942	3.1663	0.809017	1.04657	2.09904	2.42636	0.873381	2.73972	1.58573	2.16715	1.37811	2.0883	1.08972	0.988923	1.33018	2.27101	2.27955	1.42926	0.960174	0.906059	1.85631	2.30575	0.85051	1.1694	1.51104	1.12062
Komagataeibacter medellinensis	3.3536	2.76562	3.85215	4.57662	3.26936	2.66891	3.9573	2.65303	3.41449	2.39708	4.64481	3.29137	3.30369	4.47155	3.5337	3.18036	3.26793	3.56102	2.93875	3.26066	3.72902	4.1045	3.08347	2.9039	5.08189	2.89695	2.89576	4.22904	4.10069	3.13005	4.72933	3.72153	4.05489	3.20811	3.83083	3.15518	3.45216	3.19182	4.24152	4.39266	2.8136	3.44283	2.7127	3.42402	4.06695	2.18852	3.2001	3.52793	3.25242
Komagataeibacter oboediens	4.83081	4.07316	5.7185	6.00248	4.62118	4.63854	5.45769	4.20574	5.81862	4.24493	6.03673	4.51453	5.1109	6.34623	4.84429	4.58583	4.89729	4.91419	4.65736	5.11334	5.05761	5.54916	4.66777	4.4731	6.63296	4.26239	4.37233	5.78982	5.90593	4.73892	5.7798	4.9256	5.46935	4.64749	5.42244	4.58006	4.77726	4.60618	5.97368	5.82672	4.72941	4.54468	4.00114	5.02227	5.46344	4.27069	4.56329	4.823	4.75568
Komagataeibacter rhaeticus	1.46832	1.07414	2.46615	2.76514	2.18351	1.43296	2.41011	1.38626	2.13402	1.20813	2.86071	0.926908	1.98012	3.03427	1.88234	0.797956	1.39015	1.79522	0.943227	2.23215	1.69182	2.45246	1.49346	0.944958	3.24744	0.7639	1.27552	2.48608	2.48302	1.56953	1.60685	2.02473	1.64121	0.667829	2.11888	1.44605	1.65691	1.97301	2.62765	2.06136	1.54986	1.60466	1.52733	1.87963	0.274505	1.10966	1.43924	1.42578	1.64222
Komagataeibacter xylinus	3.87883	3.0865	5.85875	5.26388	3.47666	4.73716	5.18761	4.15191	4.5338	3.96751	5.35226	3.42225	4.85287	5.97056	4.36758	3.38121	4.67204	4.13747	3.62538	4.66672	4.18166	5.09018	4.11193	3.83799	6.10206	3.34171	3.65858	5.18822	5.88952	4.24394	4.28547	4.15259	4.39508	3.56513	4.81634	4.46381	4.09069	4.41121	5.25946	4.85414	4.73452	3.81597	3.01933	3.99668	3.71183	4.12935	3.85093	3.8145	4.12364
Kozakia baliensis	1.59533	1.12281	2.56945	3.12898	1.15075	1.74976	2.30341	1.36747	1.97419	1.55649	3.22622	0.969267	2.13646	3.09564	2.19543	0.781616	1.63807	2.11139	0.940448	1.06889	1.98038	2.88218	1.862	1.32135	3.32751	1.21957	1.87148	2.71213	3.00096	1.36113	1.73206	2.24339	2.08515	0.335824	2.14643	1.73722	2.33269	1.65243	2.98543	2.56053	1.62135	2.08501	0.88814	1.18649	0.425786	1.46453	1.9437	1.82933	1.88403
Lactobacillus brevis	8.22499	5.52741	7.88671	8.16018	5.81745	6.45799	7.61026	9.21987	8.06116	7.56372	10.6606	8.77441	9.13676	10.9687	9.29616	5.29061	8.11278	11.0104	9.17466	6.6954	9.64475	9.91362	7.47377	7.668	9.15842	8.61655	8.59832	9.8882	9.28079	8.73421	7.99072	8.87664	8.66867	10.2083	9.27759	8.83776	7.26906	9.55277	6.38673	9.10451	7.96154	8.60764	8.99822	9.26301	9.60465	6.1482	9.56536	9.92851	8.04082
Lactobacillus fabifermentans	2.18615	-0.632484	0.63053	2.5434	1.77256	-1.35215	-1.02784	-0.0215658	2.42944	0.0118803	3.67842	2.13535	2.43839	5.13723	2.77577	-3.37658	2.01714	3.13106	3.16018	0.163033	1.36578	3.26294	-0.431545	0.784918	0.54464	2.22394	-1.0274	5.10417	1.62677	2.82396	-0.0216533	2.93245	2.25676	3.66452	2.54614	1.82817	0.600284	0.431945	2.76987	3.10934	-0.0939187	0.453076	0.726899	2.80398	1.73477	-1.23703	1.16603	3.76971	3.3161
Lactobacillus fermentum	1.20639	-0.201075	0.102381	1.07896	0.591053	0.222421	0.183335	0.884305	1.19052	2.20112	2.35112	0.918861	0.876599	2.66851	2.34366	0.103774	0.714119	2.62497	1.59818	0.0105017	0.898108	1.68298	0.0969229	0.762097	0.766966	1.08849	0.408413	2.88309	1.15874	1.31142	0.285455	1.5049	0.817007	2.58737	1.38349	1.29259	0.352893	1.68858	1.38446	1.92812	0.23612	1.18528	1.2553	1.77967	1.18372	0.163337	0.96655	1.96832	1.57831
Lactobacillus kisonensis	0.124147	-3.12848	-0.110506	0.219495	-1.78898	-1.552	-0.139298	0.954637	0.348957	0.0246568	2.11714	0.804038	0.57766	2.63375	1.41122	-1.04222	-0.172539	2.37119	1.11513	-1.1103	1.18163	1.33839	-0.363571	-0.428552	0.777499	0.679314	0.321099	1.71446	0.610557	0.678025	-0.333385	0.796926	0.496169	1.74401	0.999133	0.523031	-0.3013	1.42007	-0.9205	1.05389	-0.0707529	0.388174	0.816224	0.924197	1.205	-0.946361	0.737004	1.66643	0.266687
Lactobacillus plantarum	8.42286	5.84387	6.78477	8.88821	8.28028	4.90464	4.41703	4.12066	8.51212	5.75611	9.93136	8.17614	8.50018	10.9936	8.66781	4.15276	8.1447	9.22006	9.18805	6.22087	7.35031	9.49834	5.24558	6.69442	6.2928	8.2379	3.19782	11.5004	7.43491	9.10881	5.92488	9.30798	8.78591	9.9756	8.63138	7.88751	6.68518	6.12432	9.03276	9.46146	5.65185	6.38817	6.287	8.96823	7.81548	3.72611	7.11653	9.95266	9.52372
Lactobacillus rhamnosus	2.11431	-0.346496	0.399388	2.55267	1.8952	-0.75389	-0.667865	-0.771455	2.24551	0.55096	3.47884	2.03239	2.19845	4.68493	2.6464	-3.34591	1.69627	2.80272	2.93048	-0.355656	1.17024	3.08627	-0.302087	0.486979	0.132235	1.97197	-1.91319	4.93296	1.38811	2.73739	-0.118761	2.94443	2.25626	3.38909	2.09742	1.82521	0.58403	0.36246	2.6788	3.11542	-0.479484	0.701676	0.532906	2.52041	1.58495	-1.38091	1.15678	3.43981	3.15566
Lactococcus lactis	2.79938	1.97346	2.14428	2.46692	1.86021	2.47397	2.15499	2.2425	2.67469	2.44062	1.84554	1.81751	1.7702	1.91641	2.54871	1.82636	2.02407	2.64263	2.57301	1.91335	2.23049	2.39777	2.52094	2.87459	2.38439	2.55775	2.72248	2.14049	2.68242	1.93962	2.60329	2.63796	1.84299	2.8991	2.51953	2.09512	2.76097	2.97783	2.5695	1.75926	2.57898	2.53449	3.07215	2.83786	1.95858	2.57527	2.21241	2.90275	2.00735
Leuconostoc pseudomesenteroides	-0.144184	-0.0462672	0.00700944	-0.37835	-0.516877	-0.368892	-0.467146	-0.434785	-0.391535	0.0733826	-0.797534	-0.465586	-0.531652	-0.583512	-0.0337102	-0.263967	-0.6914	-0.392383	-0.330813	-0.399875	-0.516809	-0.682055	0.117576	0.00538787	-0.515244	-0.286419	0.113734	-0.450275	-0.250813	-0.610815	-0.519001	0.178531	-0.627362	-0.174761	-0.656084	-0.38471	-0.360629	-0.054133	0.0416287	-0.5603	-0.337294	-0.725345	-0.140523	0.361039	-0.660065	-0.283759	-0.190076	-0.205795	-0.498385
Mesorhizobium sp.	1.05129	1.27543	1.09558	0.990379	1.23577	1.15882	0.98817	1.35586	1.2296	1.53402	0.839452	1.23955	1.29505	0.798541	1.25507	1.47733	1.30868	0.828579	1.35633	1.13083	0.928435	0.859993	1.3057	1.18468	1.06243	1.33676	1.15238	0.686654	0.997488	1.219	1.22779	1.22181	1.04775	1.06589	1.041	1.28562	1.27854	1.17354	0.991506	0.914822	1.31379	1.20881	1.18645	1.29283	1.0642	1.31674	1.18314	1.09412	1.33564
Metarhizium brunneum	8.13388	8.11984	7.90677	7.16153	7.83758	7.78997	6.96175	7.62314	7.90839	7.77523	6.76668	7.61096	7.49756	7.26274	7.52557	8.21495	8.0085	7.1081	7.95473	7.93081	7.04745	7.2781	7.50752	8.20833	7.11608	7.39841	7.6878	6.7804	7.39254	8.00392	7.32779	7.48046	7.86127	7.69906	7.62738	7.46912	7.86946	8.26979	7.23219	7.18287	7.52395	7.66504	7.78815	8.04822	7.98044	8.03567	7.68224	7.49239	7.13829
Methylobacterium extorquens	-0.555041	-0.465416	-0.979182	-0.509137	-0.349242	-0.334185	-0.169899	-0.132963	-0.11666	-0.189235	-0.495609	0.132994	-0.157854	-0.602889	-0.430866	-0.170095	-0.263181	-0.440472	-0.553217	-0.730017	-0.535008	-0.877821	0.319867	-1.17576	-0.777499	-0.271716	-0.632412	-0.70102	-1.04418	-0.463399	-0.265682	0.0280044	-0.930177	-0.246093	-0.287057	-0.12281	-0.0740791	-0.397778	-0.996822	-0.603285	-0.230557	-1.0668	-0.219246	-0.536421	-0.72713	-0.571715	-0.802791	-0.482096	-0.526466
Nora virus	2.03215	3.49224	1.29687	3.30012	2.2278	0.960811	1.85744	2.52773	5.41324	8.85171	3.1546	1.81404	2.9968	1.89015	3.66697	3.25523	2.48272	8.30981	1.77115	3.57369	11.7729	14.4915	13.3147	2.52842	1.25847	14.5215	3.65335	11.1413	12.4618	4.51772	1.8908	3.29125	1.90058	2.07903	14.8289	2.46064	3.14193	14.5515	0.927414	15.0214	9.02413	3.40276	1.73205	2.97425	2.4908	3.27517	14.5295	1.7463	13.7974
Paenibacillus borealis	-0.14888	0.571511	0.0682125	-0.417341	0.574354	0.276604	-0.071127	0.348898	0.349557	0.0234515	-0.226597	-0.0786412	0.215427	-0.37103	0.716615	0.406343	0.589617	-0.877069	0.461085	0.287824	-0.463841	-0.520506	-0.216933	-0.20287	-0.09192	0.315586	0.200421	-0.29646	0.847434	0.477797	-0.0957782	0.83502	0.665502	0.553232	-0.085855	0.150679	0.224833	0.336344	-0.161358	0.505855	0.332978	0.450168	0.576164	0.619025	0.727217	1.11015	1.21653	0.0239742	0.459693
Paenibacillus sp.	0.501393	0.500051	0.232056	0.479221	0.525189	0.691057	0.664714	0.715853	0.889427	1.21186	0.287026	0.764759	0.407786	0.385137	1.20154	0.559518	0.752782	0.412041	0.793669	0.70711	0.639855	0.20658	0.875305	0.57856	0.373128	0.718556	0.783201	0.292106	0.649027	0.39839	0.530012	0.790533	0.349484	1.04278	0.503134	0.907499	0.762434	0.534544	0.239429	0.293645	0.591386	0.0930243	0.790526	0.52308	0.382993	0.77783	0.663703	0.545031	0.56615
Pectobacterium carotovorum	8.79318	8.81706	8.78962	8.59955	9.37594	8.89707	8.37945	8.95665	8.81245	8.98696	8.29441	8.56939	8.49764	8.32388	9.08059	8.78871	9.34312	8.83716	9.12802	8.7149	8.77889	8.49091	8.50044	8.83577	8.31872	8.54693	8.56116	8.54497	8.89403	9.31183	8.75083	8.73383	8.9944	8.83745	8.99545	8.94222	8.97181	8.6411	8.64561	8.50906	8.92669	8.80911	8.71591	9.04219	9.1759	8.71239	8.88085	9.12236	8.58372
Plasmodium vivax	9.5618	9.53742	9.31541	9.02941	9.43524	9.34342	8.93085	9.0629	9.24582	9.08096	8.67674	9.10506	9.38878	8.99672	9.71394	9.72774	9.35603	9.16406	9.54415	9.48362	9.10304	8.91338	9.43987	9.59086	9.02779	9.47669	9.51934	8.67515	9.14942	9.38097	9.1679	9.19563	9.38524	9.23646	9.32694	9.42977	9.29203	9.38237	8.99331	8.98484	9.36293	9.48851	9.5228	9.351	9.33925	9.45221	9.50437	9.34539	9.29095
Podospora anserina	7.51322	7.52564	7.34696	6.86698	7.36351	7.47646	6.76212	7.03068	7.41368	7.27853	6.65483	7.15238	7.25968	6.82025	7.30027	7.74709	7.37433	6.88863	7.46109	7.37002	6.90866	6.73272	7.20663	7.35018	6.88709	7.28064	7.53589	6.33826	6.76087	7.62369	7.08142	7.04992	7.43268	7.38164	7.23654	7.21416	7.18121	7.38525	6.85451	6.83691	7.20242	7.26963	7.25479	7.36693	7.15648	7.4988	7.28449	7.10186	7.10301
Propionibacterium acnes	2.57222	2.55151	2.46028	2.36238	2.43213	2.61279	2.56228	2.7919	2.45752	2.58011	2.14506	2.51989	2.583	2.25519	2.71342	2.66615	2.48091	2.23631	2.46505	2.50122	2.52607	2.3732	2.68616	2.38954	2.22892	2.8422	2.69334	2.26989	2.36809	2.44722	2.60152	2.39251	2.16677	2.71671	2.35765	2.48324	2.5171	2.5862	2.11222	2.35516	2.74359	2.47912	2.56026	2.71615	2.65962	2.6704	2.50091	2.55247	2.47914
Pseudodonghicola xiamenensis	5.11066	5.2145	4.66768	4.52888	5.81804	5.22586	4.28553	5.43328	4.76197	5.08013	4.08632	4.70368	4.42185	4.09413	5.41271	4.9302	5.60562	5.17378	4.74055	4.78494	5.01136	4.52976	4.58719	4.61318	4.30421	4.92373	4.7113	4.63043	4.23874	5.62423	4.95231	4.85045	5.02209	5.08696	5.2571	4.87628	5.08296	5.19145	4.46585	4.53965	4.80204	4.61149	4.93932	5.15504	5.45613	4.75016	4.69906	5.29714	4.82719
Pseudomonas putida	1.0797	0.997691	0.869703	0.712462	1.2124	0.968819	0.921716	0.91527	0.779235	1.21108	0.59219	1.03087	0.908496	0.717838	0.938733	1.15138	1.01315	0.828787	1.02471	1.02552	0.930059	0.678282	1.11443	0.820229	0.760795	1.39575	1.09588	0.794925	0.832141	1.19947	0.813399	0.945049	0.963656	0.968223	1.25764	1.10652	0.955521	0.9759	0.7618	0.731098	1.05216	1.1024	1.09349	1.00156	0.89387	0.985606	0.939488	0.819824	1.23617
Pseudomonas sp.	0.509222	0.391133	0.320244	0.232744	0.677345	0.4153	0.46283	0.550505	0.454419	0.804535	0.0369319	0.408034	0.314296	0.0967468	0.258667	0.658207	0.36488	0.0642672	0.50206	0.286977	0.403632	0.213892	0.51582	0.507692	0.182756	0.692349	0.741192	0.304584	0.354775	0.441046	0.351105	0.490485	0.300668	0.485241	0.490781	0.474975	0.29622	0.348148	0.308424	0.14029	0.495251	0.44434	0.602452	0.471759	0.465795	0.53602	0.247192	0.418293	0.570259
Psychrobacter glacincola	2.42448	2.37092	1.8827	1.02648	1.99419	1.87932	0.956851	1.82978	2.01702	2.07404	1.60893	1.24581	1.57542	1.67268	3.25249	1.55915	2.11235	2.48923	2.00196	1.31223	2.46063	1.43893	0.935838	1.85255	0.940788	2.19543	1.80474	1.81095	1.2054	1.71895	1.76974	1.52469	1.84278	1.87692	2.64489	2.19874	1.73356	1.63898	0.828189	0.850104	1.3317	1.94809	1.22985	1.82323	2.60156	1.22255	1.36587	2.15265	1.5103
Sporolactobacillus terrae	-0.211212	-0.42063	-0.0768737	-0.189533	-0.348381	-0.285933	0.0675849	-0.246805	-0.10855	0.214622	-0.33696	-0.017726	-0.427796	-0.384744	-0.318635	-0.0211158	-0.339229	-0.157437	-0.247553	-0.49759	-0.38108	-0.280613	-0.191954	-0.0933122	-0.361631	-0.120194	-0.129999	-0.469447	-0.402906	-0.513027	-0.206592	-0.390439	-0.391719	-0.195866	-0.356459	-0.317117	-0.43012	-0.363899	-0.492163	-0.982484	-0.211522	-0.466411	0.045023	-0.144856	-0.310257	-0.181199	-0.447842	-0.406829	-0.430612
Staphylococcus epidermidis	0.431038	0.462449	0.117469	0.21493	0.234795	0.46307	0.337633	0.422371	0.402709	0.81703	0.0536603	0.349952	0.213382	0.175546	0.443062	0.614284	0.480688	0.191458	0.390446	0.0881035	0.296827	0.136716	0.520243	0.344437	0.132193	0.307468	0.510356	0.251647	0.34485	0.353652	0.436256	0.467733	0.067545	0.567805	0.260525	0.449733	0.449269	0.538286	0.296277	0.138879	0.620171	0.427271	0.600844	0.483371	0.391823	0.419436	0.201972	0.385035	0.482519
Streptococcus pneumoniae	8.75393	8.78438	8.35057	8.58299	8.84968	8.72865	8.37428	8.71142	8.78951	8.79776	8.39046	8.45938	8.78628	8.14469	8.87175	9.01509	8.86967	8.60455	9.1923	8.78708	8.74366	8.19533	8.52469	8.9118	8.25321	8.64005	8.61842	8.35115	8.72311	8.71143	8.59874	8.57359	8.69837	8.77712	8.53489	8.81245	8.70603	8.68868	8.41728	8.26847	8.66764	8.74022	8.66374	8.72908	8.7129	8.64079	9.02251	8.5782	8.45942
Streptomyces griseoflavus	6.94223	6.98432	6.78564	6.30179	6.75219	6.89634	6.37255	6.48316	6.77961	6.53557	6.2258	6.5552	6.78109	6.3231	6.76178	7.1196	6.60228	6.37066	6.99769	6.84678	6.29321	6.23047	6.66529	7.03399	6.39155	6.7202	6.85777	5.9491	6.50952	6.68437	6.4963	6.59238	6.92135	6.70773	6.65537	6.59307	6.70747	6.79165	6.42795	6.36012	6.62384	6.85662	7.01185	6.85564	6.87559	7.05455	6.78895	6.77018	6.62517
Streptomyces pristinaespiralis	6.6309	6.55274	6.43401	5.84408	6.32884	6.52075	5.80454	6.16158	6.38679	6.22397	5.6766	6.18957	6.39628	6.02225	6.16563	6.74528	6.23002	6.05517	6.58835	6.49312	5.74651	5.8774	6.21256	6.67206	6.02342	6.28155	6.49405	5.42059	6.03559	6.39559	6.13775	6.18918	6.55868	6.41572	6.30536	6.15779	6.32626	6.38057	6.05209	6.03135	6.20924	6.55482	6.60955	6.47598	6.4139	6.69496	6.41254	6.31336	5.95144
Streptomyces sp.	3.3719	3.44559	3.35981	3.18629	3.27199	3.31483	3.49928	3.0839	3.32236	3.37977	2.94105	3.34131	3.19805	3.07273	3.49042	3.76871	3.43765	3.08854	3.36244	3.32459	2.87371	3.01811	3.37403	3.2008	3.17145	3.48088	3.61429	2.92964	3.05618	3.37326	3.13874	3.32398	3.28983	3.24512	3.09984	3.23846	3.13189	3.35908	2.91759	3.03805	3.37495	3.22593	3.45963	3.31834	3.22243	3.39551	3.2943	3.16033	3.16258
Tremella mesenterica	9.73338	10.1712	9.65892	9.01928	10.5872	9.44624	8.74801	9.64826	9.79881	9.40395	8.74012	9.72492	9.27668	9.1109	10.203	9.43811	10.1425	9.69213	9.26804	9.15692	9.75158	9.01646	9.12006	9.70039	8.78698	9.83466	9.82404	8.66329	9.00519	11.4393	9.76815	9.82001	9.61968	9.37344	9.61615	9.28044	9.47505	9.73292	9.13113	8.79126	9.35946	9.28116	9.75901	9.53246	9.98844	9.50029	9.2792	9.59048	9.26803
Zymomonas mobilis	1.50506	-0.148785	3.94101	-0.44842	1.21471	2.36774	3.7435	2.20655	0.912566	1.91388	0.546513	1.65167	2.60002	2.45143	-0.0148411	1.95597	3.22466	-1.71176	0.87825	2.13278	0.829472	1.53003	2.02191	1.73922	2.78332	0.847449	-0.901772	1.35612	4.05872	0.784109	2.85707	-1.47287	2.1044	1.65763	1.42845	1.85852	-1.4925	2.39487	1.96388	2.38387	2.59114	-1.62492	0.51033	1.8393	2.6664	1.76222	0.41636	0.762675	-1.66317
[truncated: 151 more columns]

## Sheet: Table S10D
Module	Module Size	Average Connectivity	Microbial Species in Module
1	4	0.348518	Acetobacter aceti, Acetobacter nitrogenifigens, Zymomonas mobilis, Komagataeibacter hansenii
2	7	0.188079	Lactobacillus fabifermentans, Lactobacillus rhamnosus, Lactobacillus plantarum, Lactobacillus fermentum, Lactobacillus kisonensis, Lactobacillus brevis, Enterococcus hirae
3	15	0.127921	Streptomyces griseoflavus, Gemmata obscuriglobus, Aspergillus nidulans, Streptomyces pristinaespiralis, Plasmodium vivax, Podospora anserina, Aspergillus terreus,Malassezia globosa, Chaetomium globosum, Metarhizium brunneum, Exophiala xenobiotica, Streptomyces sp., Streptococcus pneumoniae, Klebsiella pneumoniae, Mesorhizobium sp., Paenibacillus borealis
4	43	0.122941	Acetobacter syzygii, Acetobacter ghanensis, Acetobacter okinawensis, Acetobacter cibinongensis, Komagataeibacter medellinensis, Gluconobacter thailandicus, Asaia sp., Acetobacter orientalis, Gluconobacter frateurii, Gluconobacter morbifer, Komagataeibacter oboediens, Gluconobacter oxydans, Kozakia baliensis, Komagataeibacter kakiaceti, Asaia prunellae, Acidomonas methanolica, Komagataeibacter eur…
5	5	0.0665227	Pseudodonghicola xiamenensis, Pectobacterium carotovorum, Tremella mesenterica, Gemmata sp., Psychrobacter glacincola
