# Supplementary figures and images for: Gene expression networks in the Drosophila Genetic Reference Panel
Source: HighWire-hosted journal article supplement (doi:10.1101/gr.257592.119), 2020-03-01

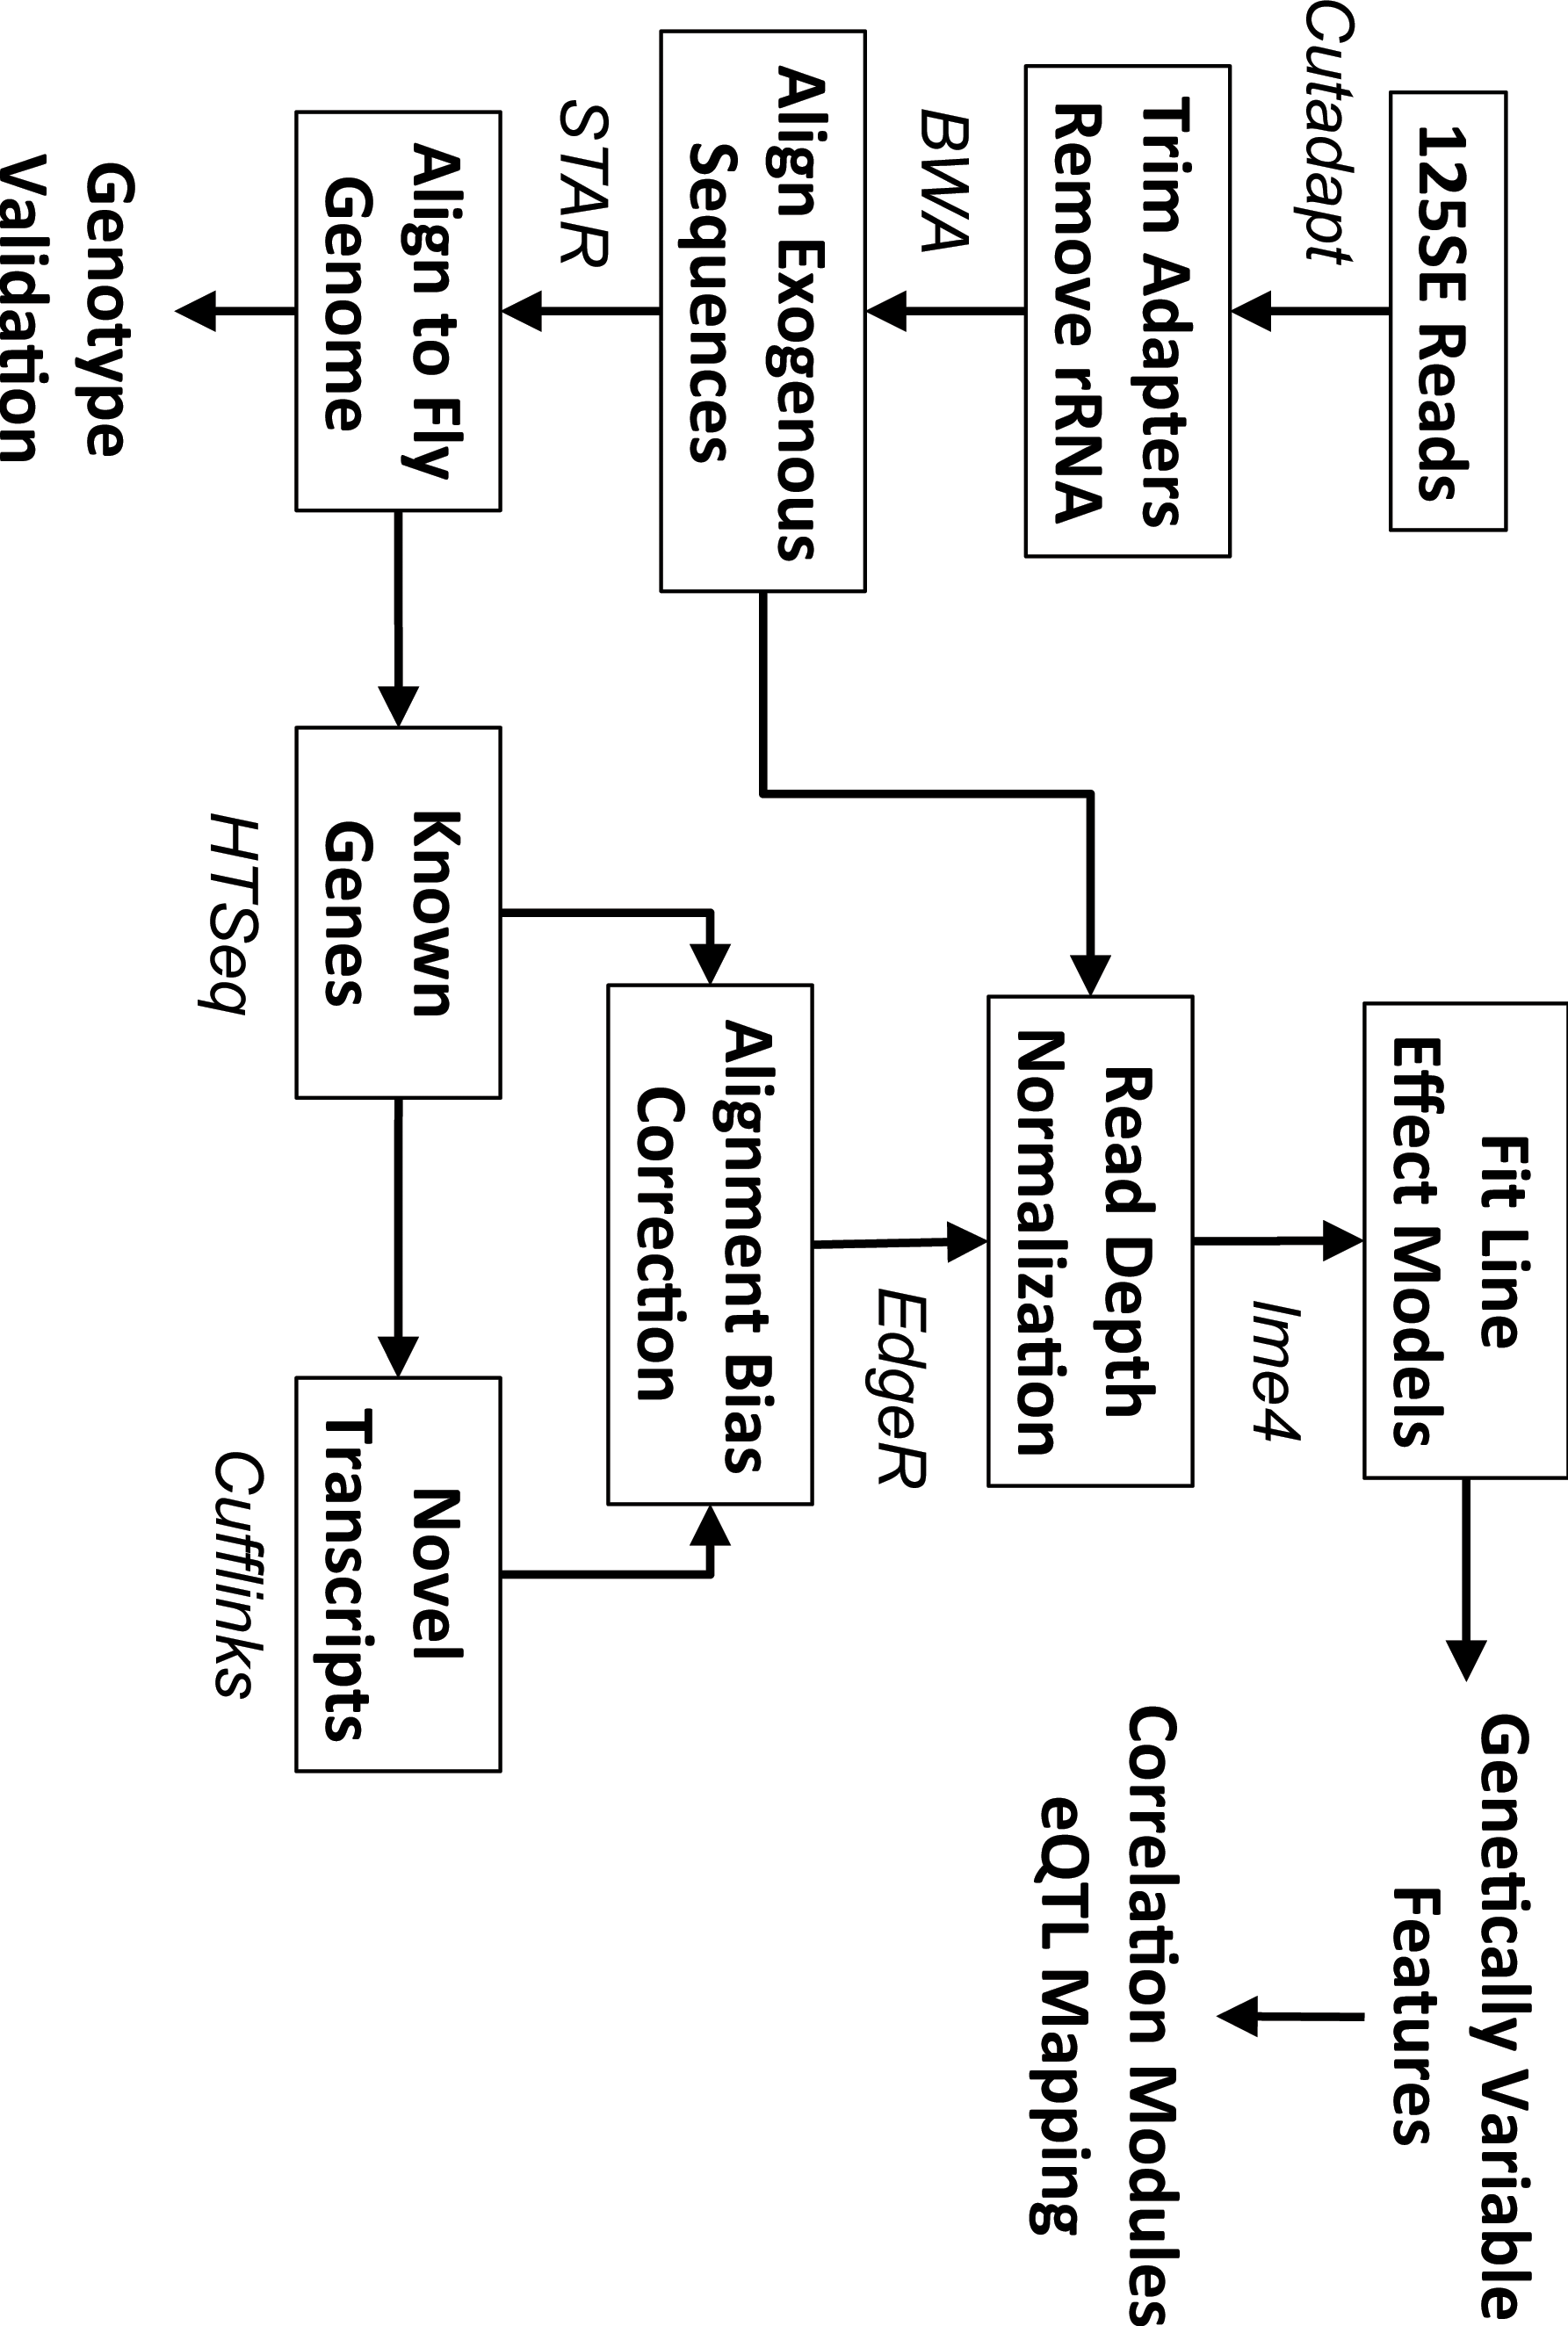
**Supplemental Figure S1.** **Schematic of the bioinformatics pipeline used for RNAseq analysis.**

Supplement: Supplemental_Fig_S1.docx [file Supplemental_Fig_S1.docx]
